# Supplementary material for: BridGE: a pathway-based analysis tool for detecting genetic interactions from GWAS
Source: Springer Nature journal article supplement (doi:10.1038/s41596-024-00954-8), 2024-03-21
Supplement: MOESM2 [file 41596_2024_954_MOESM2_ESM8.zip]

## Sheet: Summary_table_PD-NIA cohort
The number of discoveries made in PD-NIA cohort at different FDR cutoffs based on recessive/dominant combined disease model.
The original BridGE summary table , which is reported in the Fang et. al. 2019
	min(FDR)	FDR<=0.05	FDR<=0.1	FDR<=0.15	FDR<=0.2	FDR<=0.25
BPM	0.0428571	9	31	79	114	173
WPM	0	2	2	3	3	4
PATH	0.1	-	2	2	5	5
BridGE 2.0 summary table
	min(FDR)	FDR<=0.05	FDR<=0.1	FDR<=0.15	FDR<=0.2	FDR<=0.25
BPM	0	9	14	20	29	41
WPM	0	2	3	3	4	4
PATH	0	1	1	3	5	5

## Sheet: Summary_table_PD-NGRC cohort
The number of discoveries made in PD-NIA cohort at different FDR cutoffs based on dominant-dominant disease model.
The original BridGE summary table , which is reported in the Fang et. al. 2019
	min(FDR)	FDR<=0.05	FDR<=0.1	FDR<=0.15	FDR<=0.2	FDR<=0.25	FDR<=0.3
BPM	0.3	-	-	-	-	-	11
WPM	0	1	2	2	3	4	5
PATH	0.17	-	-	-	12	12	12
BridGE 2.0 summary table
	min(FDR)	FDR<=0.05	FDR<=0.1	FDR<=0.15	FDR<=0.2	FDR<=0.25	FDR<=0.3
BPM	0	2	4	6	6	8	8
WPM	0.1	0	1	1	1	3	3
PATH	0.154545	0	0	0	11	11	11
