# Supplementary material for: BridGE: a pathway-based analysis tool for detecting genetic interactions from GWAS
Source: Springer Nature journal article supplement (doi:10.1038/s41596-024-00954-8), 2024-03-21
Supplement: MOESM3 [file 41596_2024_954_MOESM3_ESM9.zip]

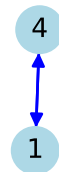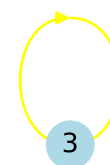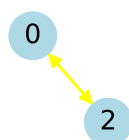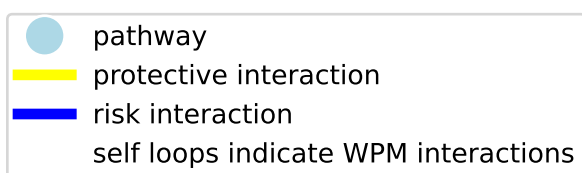

- 0: REACTOME\_ORGANELLE\_BIOGENESIS\_AND\_MAINTENANCE
- 1: REACTOME\_INTERFERON\_SIGNALING
- 2: KEGG\_NEUROTROPHIN\_SIGNALING\_PATHWAY
- 3: REACTOME\_ACTIVATION\_OF\_MATRIX\_METALLOPROTEINASES
- 4: REACTOME\_METABOLISM\_OF\_CARBOHYDRATES
