# Supplementary material for: BridGE: a pathway-based analysis tool for detecting genetic interactions from GWAS
Source: Springer Nature journal article supplement (doi:10.1038/s41596-024-00954-8), 2024-03-21
Supplement: MOESM3 [file 41596_2024_954_MOESM3_ESM9.zip]

## Sheet: Sheet1
path1	path2	snp1	chr1	loc1	gene1	snp2	chr2	loc2	gene2	GI type	case frequency	control frequency	GI	OR	effect	LD
KEGG_NEUROTROPHIN_SIGNALING_PATHWAY	REACTOME_ORGANELLE_BIOGENESIS_AND_MAINTENANCE	rs201635960	5	180199887	MAPK9	rs2655172	8	70154581	NCOA2	recessive_dominant	0.0899001	0.158713	5.10166	0.523606	protective	NA
KEGG_NEUROTROPHIN_SIGNALING_PATHWAY	REACTOME_ORGANELLE_BIOGENESIS_AND_MAINTENANCE	rs2239798	6	36177857	MAPK13	rs17166570	5	132660439	KIF3A	dominant	0.0255272	0.0654828	4.28529	0.373847	protective	NA
KEGG_NEUROTROPHIN_SIGNALING_PATHWAY	REACTOME_ORGANELLE_BIOGENESIS_AND_MAINTENANCE	rs998521	15	66407072	MAP2K1	rs2489138	1	156526564	MEF2D	dominant	0.193119	0.27081	4.1409	0.644452	protective	NA
KEGG_NEUROTROPHIN_SIGNALING_PATHWAY	REACTOME_ORGANELLE_BIOGENESIS_AND_MAINTENANCE	rs2908290	7	44216137	CAMK2B	rs2489138	1	156526564	MEF2D	dominant	0.381798	0.469478	3.92341	0.697896	protective	NA
KEGG_NEUROTROPHIN_SIGNALING_PATHWAY	REACTOME_ORGANELLE_BIOGENESIS_AND_MAINTENANCE	rs7497619	15	49007401	SHC4	rs6432044	2	10041284	CYS1	recessive_dominant	0.0310766	0.0721421	3.89403	0.412512	protective	NA
KEGG_NEUROTROPHIN_SIGNALING_PATHWAY	REACTOME_ORGANELLE_BIOGENESIS_AND_MAINTENANCE	rs2908290	7	44216137	CAMK2B	rs2655172	8	70154581	NCOA2	recessive_dominant	0.104329	0.165372	3.86778	0.587876	protective	NA
KEGG_NEUROTROPHIN_SIGNALING_PATHWAY	REACTOME_ORGANELLE_BIOGENESIS_AND_MAINTENANCE	rs7482257	11	27755298	BDNF	rs890980	5	477303	EXOC3	recessive	0.0266371	0.063263	3.65666	0.405209	protective	NA
KEGG_NEUROTROPHIN_SIGNALING_PATHWAY	REACTOME_ORGANELLE_BIOGENESIS_AND_MAINTENANCE	rs2908290	7	44216137	CAMK2B	rs2130923	4	23781504	PPARGC1A	recessive_dominant	0.0466149	0.0899001	3.61852	0.494977	protective	NA
KEGG_NEUROTROPHIN_SIGNALING_PATHWAY	REACTOME_ORGANELLE_BIOGENESIS_AND_MAINTENANCE	rs9347129	6	166895934	RPS6KA2	rs201143490	9	136452021	INPP5E	recessive_dominant	0.00554939	0.0288568	3.57306	0.1878	protective	NA
KEGG_NEUROTROPHIN_SIGNALING_PATHWAY	REACTOME_ORGANELLE_BIOGENESIS_AND_MAINTENANCE	rs9347129	6	166895934	RPS6KA2	rs73916491	20	59046695	TUBB1	dominant	0.0233074	0.0577137	3.55127	0.38962	protective	NA
KEGG_NEUROTROPHIN_SIGNALING_PATHWAY	REACTOME_ORGANELLE_BIOGENESIS_AND_MAINTENANCE	rs1245510	10	73799959	CAMK2G	rs2489138	1	156526564	MEF2D	recessive_dominant	0.0921199	0.148724	3.51772	0.580785	protective	NA
KEGG_NEUROTROPHIN_SIGNALING_PATHWAY	REACTOME_ORGANELLE_BIOGENESIS_AND_MAINTENANCE	rs2169633	15	66467291	MAP2K1	rs11707509	3	196346629	TCTEX1D2	recessive_dominant	0.063263	0.112098	3.48092	0.534935	protective	NA
KEGG_NEUROTROPHIN_SIGNALING_PATHWAY	REACTOME_ORGANELLE_BIOGENESIS_AND_MAINTENANCE	rs2803965	14	73098014	PSEN1	rs4917904	10	102447292	ACTR1A	recessive_dominant	0.0199778	0.0521643	3.39013	0.370401	protective	NA
KEGG_NEUROTROPHIN_SIGNALING_PATHWAY	REACTOME_ORGANELLE_BIOGENESIS_AND_MAINTENANCE	rs998521	15	66407072	MAP2K1	rs9348164	6	167071948	FGFR1OP	dominant	0.186459	0.255272	3.36718	0.668652	protective	NA
KEGG_NEUROTROPHIN_SIGNALING_PATHWAY	REACTOME_ORGANELLE_BIOGENESIS_AND_MAINTENANCE	rs557328	19	7902965	MAP2K7	rs890980	5	477303	EXOC3	recessive_dominant	0.104329	0.160932	3.36709	0.607307	protective	NA
KEGG_NEUROTROPHIN_SIGNALING_PATHWAY	REACTOME_ORGANELLE_BIOGENESIS_AND_MAINTENANCE	rs998521	15	66407072	MAP2K1	rs13061728	3	97786914	ARL6	dominant	0.221976	0.295228	3.3539	0.681089	protective	NA
KEGG_NEUROTROPHIN_SIGNALING_PATHWAY	REACTOME_ORGANELLE_BIOGENESIS_AND_MAINTENANCE	rs201635960	5	180199887	MAPK9	rs2847251	18	12751036	CEP76	recessive_dominant	0.0144284	0.0421754	3.31542	0.332474	protective	NA
KEGG_NEUROTROPHIN_SIGNALING_PATHWAY	REACTOME_ORGANELLE_BIOGENESIS_AND_MAINTENANCE	rs2169633	15	66467291	MAP2K1	rs7848846	9	137151050	SSNA1	recessive	0.00443951	0.0244173	3.28717	0.17817	protective	NA
KEGG_NEUROTROPHIN_SIGNALING_PATHWAY	REACTOME_ORGANELLE_BIOGENESIS_AND_MAINTENANCE	rs13322072	3	179282730	PIK3CA	rs2489138	1	156526564	MEF2D	dominant	0.352941	0.430633	3.28024	0.721181	protective	NA
KEGG_NEUROTROPHIN_SIGNALING_PATHWAY	REACTOME_ORGANELLE_BIOGENESIS_AND_MAINTENANCE	rs1007802	1	206735691	MAPKAPK2	rs12933372	16	80566189	DYNLRB2	recessive	0.00443951	0.0255272	3.27874	0.170229	protective	NA
KEGG_NEUROTROPHIN_SIGNALING_PATHWAY	REACTOME_ORGANELLE_BIOGENESIS_AND_MAINTENANCE	rs7076160	10	48473929	MAPK8	rs73094828	20	32316895	KIF3B	dominant	0.0688124	0.115427	3.26187	0.566311	protective	NA
KEGG_NEUROTROPHIN_SIGNALING_PATHWAY	REACTOME_ORGANELLE_BIOGENESIS_AND_MAINTENANCE	rs2517	9	130855035	ABL1	rs34144731	4	55921913	CEP135/EXOC1	recessive_dominant	0.00110988	0.0166482	3.23323	0.0656296	protective	NA
KEGG_NEUROTROPHIN_SIGNALING_PATHWAY	REACTOME_ORGANELLE_BIOGENESIS_AND_MAINTENANCE	rs13322072	3	179282730	PIK3CA	rs4959880	6	442206	EXOC2	dominant	0.27192	0.344062	3.1651	0.712013	protective	NA
KEGG_NEUROTROPHIN_SIGNALING_PATHWAY	REACTOME_ORGANELLE_BIOGENESIS_AND_MAINTENANCE	rs998521	15	66407072	MAP2K1	rs2072826	6	135253558	AHI1	dominant	0.134295	0.195339	3.16221	0.639022	protective	NA
KEGG_NEUROTROPHIN_SIGNALING_PATHWAY	REACTOME_ORGANELLE_BIOGENESIS_AND_MAINTENANCE	rs998521	15	66407072	MAP2K1	rs12679073	8	130222310	ASAP1	dominant	0.176471	0.241953	3.13698	0.671363	protective	NA
KEGG_NEUROTROPHIN_SIGNALING_PATHWAY	REACTOME_ORGANELLE_BIOGENESIS_AND_MAINTENANCE	rs6924899	6	166476996	RPS6KA2	rs16996724	22	36772774	IFT27	dominant	0.0499445	0.0932297	3.09795	0.511307	protective	NA
KEGG_NEUROTROPHIN_SIGNALING_PATHWAY	REACTOME_ORGANELLE_BIOGENESIS_AND_MAINTENANCE	rs6924899	6	166476996	RPS6KA2	rs9678422	2	169532214	BBS5	recessive_dominant	0.00110988	0.0166482	3.0944	0.0656296	protective	NA
KEGG_NEUROTROPHIN_SIGNALING_PATHWAY	REACTOME_ORGANELLE_BIOGENESIS_AND_MAINTENANCE	rs9786966	1	3623414	TP73	rs2655172	8	70154581	NCOA2	recessive_dominant	0.082131	0.133185	3.09393	0.582366	protective	NA
KEGG_NEUROTROPHIN_SIGNALING_PATHWAY	REACTOME_ORGANELLE_BIOGENESIS_AND_MAINTENANCE	rs7805383	7	140908104	BRAF	rs17166570	5	132660439	KIF3A	dominant	0.0577137	0.099889	3.08982	0.551917	protective	NA
KEGG_NEUROTROPHIN_SIGNALING_PATHWAY	REACTOME_ORGANELLE_BIOGENESIS_AND_MAINTENANCE	rs13322072	3	179282730	PIK3CA	rs11432188	9	34575985	DCTN3	dominant	0.153163	0.214206	3.08801	0.663484	protective	NA
KEGG_NEUROTROPHIN_SIGNALING_PATHWAY	REACTOME_ORGANELLE_BIOGENESIS_AND_MAINTENANCE	rs2075076	7	44274642	CAMK2B	rs2655172	8	70154581	NCOA2	recessive_dominant	0.0621532	0.108768	3.02739	0.543026	protective	NA
KEGG_NEUROTROPHIN_SIGNALING_PATHWAY	REACTOME_ORGANELLE_BIOGENESIS_AND_MAINTENANCE	rs3844536	19	396948	SHC2	rs2489138	1	156526564	MEF2D	dominant	0.370699	0.445061	3.00426	0.734495	protective	NA
KEGG_NEUROTROPHIN_SIGNALING_PATHWAY	REACTOME_ORGANELLE_BIOGENESIS_AND_MAINTENANCE	rs71166958	19	4089029	MAP2K2	rs979802	11	103388805	DYNC2H1	recessive	0	0.0133185	2.9984	0	protective	NA
KEGG_NEUROTROPHIN_SIGNALING_PATHWAY	REACTOME_ORGANELLE_BIOGENESIS_AND_MAINTENANCE	rs7482257	11	27755298	BDNF	rs746884	20	59067268	TUBB1	recessive	0.017758	0.045505	2.99315	0.37922	protective	NA
KEGG_NEUROTROPHIN_SIGNALING_PATHWAY	REACTOME_ORGANELLE_BIOGENESIS_AND_MAINTENANCE	rs7482257	11	27755298	BDNF	rs17166570	5	132660439	KIF3A	dominant	0.0510544	0.0954495	2.99071	0.50986	protective	NA
KEGG_NEUROTROPHIN_SIGNALING_PATHWAY	REACTOME_ORGANELLE_BIOGENESIS_AND_MAINTENANCE	rs8142362	22	20979079	CRKL	rs2655172	8	70154581	NCOA2	recessive_dominant	0.0810211	0.130966	2.97302	0.585022	protective	NA
KEGG_NEUROTROPHIN_SIGNALING_PATHWAY	REACTOME_ORGANELLE_BIOGENESIS_AND_MAINTENANCE	rs11862662	16	81975892	PLCG2	rs6432044	2	10041284	CYS1	recessive_dominant	0.054384	0.0965594	2.97106	0.538098	protective	NA
KEGG_NEUROTROPHIN_SIGNALING_PATHWAY	REACTOME_ORGANELLE_BIOGENESIS_AND_MAINTENANCE	rs13322072	3	179282730	PIK3CA	rs16996724	22	36772774	IFT27	dominant	0.054384	0.0976693	2.96903	0.53133	protective	NA
KEGG_NEUROTROPHIN_SIGNALING_PATHWAY	REACTOME_ORGANELLE_BIOGENESIS_AND_MAINTENANCE	rs4877972	9	88989455	SHC3	rs6432044	2	10041284	CYS1	recessive_dominant	0.09101	0.139845	2.95445	0.61583	protective	NA
KEGG_NEUROTROPHIN_SIGNALING_PATHWAY	REACTOME_ORGANELLE_BIOGENESIS_AND_MAINTENANCE	rs13322072	3	179282730	PIK3CA	rs7833836	8	17935642	PCM1	dominant	0.391787	0.470588	2.95161	0.724681	protective	NA
KEGG_NEUROTROPHIN_SIGNALING_PATHWAY	REACTOME_ORGANELLE_BIOGENESIS_AND_MAINTENANCE	rs55967668	5	68241438	PIK3R1	rs1365962	2	218857832	PRKAG3	recessive_dominant	0.0288568	0.0610433	2.94791	0.45706	protective	NA
KEGG_NEUROTROPHIN_SIGNALING_PATHWAY	REACTOME_ORGANELLE_BIOGENESIS_AND_MAINTENANCE	rs55967668	5	68241438	PIK3R1	rs2489138	1	156526564	MEF2D	dominant	0.172031	0.234184	2.94627	0.679453	protective	NA
KEGG_NEUROTROPHIN_SIGNALING_PATHWAY	REACTOME_ORGANELLE_BIOGENESIS_AND_MAINTENANCE	rs1902716	10	48395086	MAPK8	rs11707509	3	196346629	TCTEX1D2	recessive_dominant	0.0443951	0.082131	2.92937	0.519195	protective	NA
KEGG_NEUROTROPHIN_SIGNALING_PATHWAY	REACTOME_ORGANELLE_BIOGENESIS_AND_MAINTENANCE	rs56002030	19	49073984	NTF4	rs10402773	19	33004535	CEP89	dominant	0.502775	0.576027	2.91811	0.744245	protective	2.653e-04
KEGG_NEUROTROPHIN_SIGNALING_PATHWAY	REACTOME_ORGANELLE_BIOGENESIS_AND_MAINTENANCE	rs55702801	14	73255495	PSEN1	rs10402773	19	33004535	CEP89	dominant	0.165372	0.225305	2.91585	0.681283	protective	NA
KEGG_NEUROTROPHIN_SIGNALING_PATHWAY	REACTOME_ORGANELLE_BIOGENESIS_AND_MAINTENANCE	rs56002030	19	49073984	NTF4	rs2655172	8	70154581	NCOA2	recessive_dominant	0.124306	0.1798	2.89418	0.647546	protective	NA
KEGG_NEUROTROPHIN_SIGNALING_PATHWAY	REACTOME_ORGANELLE_BIOGENESIS_AND_MAINTENANCE	rs2908290	7	44216137	CAMK2B	rs6432044	2	10041284	CYS1	recessive_dominant	0.0876804	0.135405	2.8846	0.613667	protective	NA
KEGG_NEUROTROPHIN_SIGNALING_PATHWAY	REACTOME_ORGANELLE_BIOGENESIS_AND_MAINTENANCE	rs7805383	7	140908104	BRAF	rs7438356	4	15624770	CC2D2A	recessive_dominant	0.128746	0.18313	2.88068	0.659147	protective	NA
KEGG_NEUROTROPHIN_SIGNALING_PATHWAY	REACTOME_ORGANELLE_BIOGENESIS_AND_MAINTENANCE	rs13322072	3	179282730	PIK3CA	rs7247709	19	52240015	PPP2R1A	dominant	0.376249	0.448391	2.87707	0.742059	protective	NA
KEGG_NEUROTROPHIN_SIGNALING_PATHWAY	REACTOME_ORGANELLE_BIOGENESIS_AND_MAINTENANCE	rs557328	19	7902965	MAP2K7	rs2655172	8	70154581	NCOA2	dominant	0.299667	0.368479	2.85647	0.733345	protective	NA
KEGG_NEUROTROPHIN_SIGNALING_PATHWAY	REACTOME_ORGANELLE_BIOGENESIS_AND_MAINTENANCE	rs7805383	7	140908104	BRAF	rs2655172	8	70154581	NCOA2	recessive_dominant	0.117647	0.172031	2.85391	0.64172	protective	NA
KEGG_NEUROTROPHIN_SIGNALING_PATHWAY	REACTOME_ORGANELLE_BIOGENESIS_AND_MAINTENANCE	rs1245510	10	73799959	CAMK2G	rs16996724	22	36772774	IFT27	dominant	0.0688124	0.112098	2.84135	0.585327	protective	NA
KEGG_NEUROTROPHIN_SIGNALING_PATHWAY	REACTOME_ORGANELLE_BIOGENESIS_AND_MAINTENANCE	rs55702801	14	73255495	PSEN1	rs890980	5	477303	EXOC3	recessive_dominant	0.0399556	0.0765816	2.83639	0.501835	protective	NA
KEGG_NEUROTROPHIN_SIGNALING_PATHWAY	REACTOME_ORGANELLE_BIOGENESIS_AND_MAINTENANCE	rs529025836	17	63636272	MAP3K3	rs10402773	19	33004535	CEP89	recessive_dominant	0.144284	0.200888	2.83321	0.670723	protective	NA
KEGG_NEUROTROPHIN_SIGNALING_PATHWAY	REACTOME_ORGANELLE_BIOGENESIS_AND_MAINTENANCE	rs7805383	7	140908104	BRAF	rs11168720	12	49146750	TUBA1A/TUBA1B	recessive	0.0166482	0.0443951	2.81903	0.364419	protective	NA
KEGG_NEUROTROPHIN_SIGNALING_PATHWAY	REACTOME_ORGANELLE_BIOGENESIS_AND_MAINTENANCE	rs1902716	10	48395086	MAPK8	rs6432044	2	10041284	CYS1	recessive_dominant	0.0499445	0.0899001	2.81479	0.532191	protective	NA
KEGG_NEUROTROPHIN_SIGNALING_PATHWAY	REACTOME_ORGANELLE_BIOGENESIS_AND_MAINTENANCE	rs9347129	6	166895934	RPS6KA2	rs6464184	7	151625412	PRKAG2	recessive_dominant	0.0110988	0.0332963	2.81397	0.325851	protective	NA
KEGG_NEUROTROPHIN_SIGNALING_PATHWAY	REACTOME_ORGANELLE_BIOGENESIS_AND_MAINTENANCE	rs557328	19	7902965	MAP2K7	rs7804751	7	151645370	PRKAG2	recessive	0.0210877	0.0488346	2.80307	0.419578	protective	NA
KEGG_NEUROTROPHIN_SIGNALING_PATHWAY	REACTOME_ORGANELLE_BIOGENESIS_AND_MAINTENANCE	rs56002030	19	49073984	NTF4	rs16996724	22	36772774	IFT27	dominant	0.0776915	0.122087	2.80298	0.605732	protective	NA
KEGG_NEUROTROPHIN_SIGNALING_PATHWAY	REACTOME_ORGANELLE_BIOGENESIS_AND_MAINTENANCE	rs557328	19	7902965	MAP2K7	rs6961764	7	133131298	CHCHD3	dominant	0.330744	0.400666	2.78146	0.73924	protective	NA
KEGG_NEUROTROPHIN_SIGNALING_PATHWAY	REACTOME_ORGANELLE_BIOGENESIS_AND_MAINTENANCE	rs998521	15	66407072	MAP2K1	rs4761574	12	94503883	CEP83	dominant	0.225305	0.290788	2.77714	0.709317	protective	NA
KEGG_NEUROTROPHIN_SIGNALING_PATHWAY	REACTOME_ORGANELLE_BIOGENESIS_AND_MAINTENANCE	rs998521	15	66407072	MAP2K1	rs2655172	8	70154581	NCOA2	dominant	0.214206	0.278579	2.74136	0.705933	protective	NA
KEGG_NEUROTROPHIN_SIGNALING_PATHWAY	REACTOME_ORGANELLE_BIOGENESIS_AND_MAINTENANCE	rs56002030	19	49073984	NTF4	rs890980	5	477303	EXOC3	recessive_dominant	0.150943	0.205327	2.71731	0.688048	protective	NA
KEGG_NEUROTROPHIN_SIGNALING_PATHWAY	REACTOME_ORGANELLE_BIOGENESIS_AND_MAINTENANCE	rs17051913	9	89061524	SHC3	rs11896513	2	219219183	TUBA4A/TUBA4B	dominant	0.0310766	0.063263	2.71473	0.47491	protective	NA
KEGG_NEUROTROPHIN_SIGNALING_PATHWAY	REACTOME_ORGANELLE_BIOGENESIS_AND_MAINTENANCE	rs7482257	11	27755298	BDNF	rs2655172	8	70154581	NCOA2	recessive_dominant	0.0932297	0.143174	2.71277	0.615297	protective	NA
KEGG_NEUROTROPHIN_SIGNALING_PATHWAY	REACTOME_ORGANELLE_BIOGENESIS_AND_MAINTENANCE	rs529025836	17	63636272	MAP3K3	rs12761305	10	92814031	EXOC6	recessive_dominant	0.134295	0.186459	2.70655	0.676839	protective	NA
KEGG_NEUROTROPHIN_SIGNALING_PATHWAY	REACTOME_ORGANELLE_BIOGENESIS_AND_MAINTENANCE	rs1245510	10	73799959	CAMK2G	rs17166570	5	132660439	KIF3A	dominant	0.0610433	0.100999	2.70451	0.578677	protective	NA
KEGG_NEUROTROPHIN_SIGNALING_PATHWAY	REACTOME_ORGANELLE_BIOGENESIS_AND_MAINTENANCE	rs2803965	14	73098014	PSEN1	rs28396987	22	36823436	IFT27	recessive	0.00776915	0.0277469	2.69754	0.274362	protective	NA
KEGG_NEUROTROPHIN_SIGNALING_PATHWAY	REACTOME_ORGANELLE_BIOGENESIS_AND_MAINTENANCE	rs3861824	1	58807217	JUN	rs6593798	1	147135704	PRKAB2	recessive_dominant	0.00443951	0.0221976	2.68809	0.196433	protective	4.932e-05
KEGG_NEUROTROPHIN_SIGNALING_PATHWAY	REACTOME_ORGANELLE_BIOGENESIS_AND_MAINTENANCE	rs4791329	17	7693455	TP53	rs5787093	10	95735645	TCTN3	recessive	0.0244173	0.0532741	2.67963	0.444776	protective	NA
KEGG_NEUROTROPHIN_SIGNALING_PATHWAY	REACTOME_ORGANELLE_BIOGENESIS_AND_MAINTENANCE	rs7497619	15	49007401	SHC4	rs17166570	5	132660439	KIF3A	dominant	0.0255272	0.0566038	2.67868	0.436598	protective	NA
KEGG_NEUROTROPHIN_SIGNALING_PATHWAY	REACTOME_ORGANELLE_BIOGENESIS_AND_MAINTENANCE	rs2803965	14	73098014	PSEN1	rs11707509	3	196346629	TCTEX1D2	recessive_dominant	0.0599334	0.099889	2.67681	0.574498	protective	NA
KEGG_NEUROTROPHIN_SIGNALING_PATHWAY	REACTOME_ORGANELLE_BIOGENESIS_AND_MAINTENANCE	rs529025836	17	63636272	MAP3K3	rs7214893	17	76140308	EXOC7	recessive_dominant	0.120977	0.170921	2.65011	0.667577	protective	0.001
KEGG_NEUROTROPHIN_SIGNALING_PATHWAY	REACTOME_ORGANELLE_BIOGENESIS_AND_MAINTENANCE	rs557328	19	7902965	MAP2K7	rs71626264	3	177098521	TBL1XR1	dominant	0.291898	0.357381	2.64248	0.741238	protective	NA
KEGG_NEUROTROPHIN_SIGNALING_PATHWAY	REACTOME_ORGANELLE_BIOGENESIS_AND_MAINTENANCE	rs2803965	14	73098014	PSEN1	rs2489138	1	156526564	MEF2D	dominant	0.290788	0.357381	2.63413	0.737264	protective	NA
KEGG_NEUROTROPHIN_SIGNALING_PATHWAY	REACTOME_ORGANELLE_BIOGENESIS_AND_MAINTENANCE	rs2803965	14	73098014	PSEN1	rs6855480	4	23747576	PPARGC1A	recessive_dominant	0.00887902	0.0288568	2.62674	0.30149	protective	NA
KEGG_NEUROTROPHIN_SIGNALING_PATHWAY	REACTOME_ORGANELLE_BIOGENESIS_AND_MAINTENANCE	rs55702801	14	73255495	PSEN1	rs71626264	3	177098521	TBL1XR1	dominant	0.140954	0.193119	2.62357	0.685564	protective	NA
KEGG_NEUROTROPHIN_SIGNALING_PATHWAY	REACTOME_ORGANELLE_BIOGENESIS_AND_MAINTENANCE	rs9947044	18	63263494	BCL2	rs2847251	18	12751036	CEP76	recessive_dominant	0.0266371	0.0577137	2.62135	0.446803	protective	0.001
KEGG_NEUROTROPHIN_SIGNALING_PATHWAY	REACTOME_ORGANELLE_BIOGENESIS_AND_MAINTENANCE	rs139443871	19	4165336	MAP2K2	rs13061728	3	97786914	ARL6	recessive_dominant	0.107658	0.159822	2.61761	0.634233	protective	NA
KEGG_NEUROTROPHIN_SIGNALING_PATHWAY	REACTOME_ORGANELLE_BIOGENESIS_AND_MAINTENANCE	rs13322072	3	179282730	PIK3CA	rs6961764	7	133131298	CHCHD3	dominant	0.416204	0.485017	2.61249	0.756976	protective	NA
KEGG_NEUROTROPHIN_SIGNALING_PATHWAY	REACTOME_ORGANELLE_BIOGENESIS_AND_MAINTENANCE	rs55894401	16	81730962	PLCG2	rs3806410	1	156337134	CCT3	recessive	0.00332963	0.0188679	2.61163	0.173719	protective	NA
KEGG_NEUROTROPHIN_SIGNALING_PATHWAY	REACTOME_ORGANELLE_BIOGENESIS_AND_MAINTENANCE	rs998521	15	66407072	MAP2K1	rs7833836	8	17935642	PCM1	dominant	0.218646	0.281909	2.61055	0.712794	protective	NA
KEGG_NEUROTROPHIN_SIGNALING_PATHWAY	REACTOME_ORGANELLE_BIOGENESIS_AND_MAINTENANCE	rs12986190	19	40273038	AKT2	rs10779788	1	5945990	NPHP4	dominant	0.208657	0.27081	2.60275	0.709976	protective	NA
KEGG_NEUROTROPHIN_SIGNALING_PATHWAY	REACTOME_ORGANELLE_BIOGENESIS_AND_MAINTENANCE	rs56002030	19	49073984	NTF4	rs10779788	1	5945990	NPHP4	dominant	0.380688	0.45394	2.59204	0.739438	protective	NA
KEGG_NEUROTROPHIN_SIGNALING_PATHWAY	REACTOME_ORGANELLE_BIOGENESIS_AND_MAINTENANCE	rs1902716	10	48395086	MAPK8	rs2655172	8	70154581	NCOA2	recessive_dominant	0.0554939	0.0976693	2.59179	0.542811	protective	NA
KEGG_NEUROTROPHIN_SIGNALING_PATHWAY	REACTOME_ORGANELLE_BIOGENESIS_AND_MAINTENANCE	rs2075076	7	44274642	CAMK2B	rs2280545	11	204147	SIRT3	recessive_dominant	0.0133185	0.036626	2.56797	0.355047	protective	NA
KEGG_NEUROTROPHIN_SIGNALING_PATHWAY	REACTOME_ORGANELLE_BIOGENESIS_AND_MAINTENANCE	rs2908290	7	44216137	CAMK2B	rs7247709	19	52240015	PPP2R1A	dominant	0.427303	0.495006	2.56167	0.76118	protective	NA
KEGG_NEUROTROPHIN_SIGNALING_PATHWAY	REACTOME_ORGANELLE_BIOGENESIS_AND_MAINTENANCE	rs4877972	9	88989455	SHC3	rs4936388	11	117440404	CEP164	recessive_dominant	0.0144284	0.0388457	2.55676	0.362227	protective	NA
KEGG_NEUROTROPHIN_SIGNALING_PATHWAY	REACTOME_ORGANELLE_BIOGENESIS_AND_MAINTENANCE	rs998521	15	66407072	MAP2K1	rs2018797	7	129210004	SMO	dominant	0.228635	0.291898	2.55298	0.719031	protective	NA
KEGG_NEUROTROPHIN_SIGNALING_PATHWAY	REACTOME_ORGANELLE_BIOGENESIS_AND_MAINTENANCE	rs11102837	1	115346655	NGF	rs533119830	22	40656205	MCHR1	recessive_dominant	0.0488346	0.0843507	2.55274	0.55733	protective	NA
KEGG_NEUROTROPHIN_SIGNALING_PATHWAY	REACTOME_ORGANELLE_BIOGENESIS_AND_MAINTENANCE	rs12425324	12	111407697	SH2B3	rs16996724	22	36772774	IFT27	dominant	0.0688124	0.109878	2.54494	0.598644	protective	NA
KEGG_NEUROTROPHIN_SIGNALING_PATHWAY	REACTOME_ORGANELLE_BIOGENESIS_AND_MAINTENANCE	rs529025836	17	63636272	MAP3K3	rs376270	16	57950057	CNGB1	recessive_dominant	0.120977	0.174251	2.53736	0.652191	protective	NA
KEGG_NEUROTROPHIN_SIGNALING_PATHWAY	REACTOME_ORGANELLE_BIOGENESIS_AND_MAINTENANCE	rs998521	15	66407072	MAP2K1	rs201143490	9	136452021	INPP5E	dominant	0.173141	0.231964	2.51472	0.693311	protective	NA
KEGG_NEUROTROPHIN_SIGNALING_PATHWAY	REACTOME_ORGANELLE_BIOGENESIS_AND_MAINTENANCE	rs2239798	6	36177857	MAPK13	rs7804751	7	151645370	PRKAG2	recessive_dominant	0.0610433	0.0987791	2.50877	0.593142	protective	NA
KEGG_NEUROTROPHIN_SIGNALING_PATHWAY	REACTOME_ORGANELLE_BIOGENESIS_AND_MAINTENANCE	rs11102837	1	115346655	NGF	rs11168720	12	49146750	TUBA1A/TUBA1B	recessive	0.0188679	0.0443951	2.50339	0.413942	protective	NA
KEGG_NEUROTROPHIN_SIGNALING_PATHWAY	REACTOME_ORGANELLE_BIOGENESIS_AND_MAINTENANCE	rs76273626	18	63123969	BCL2	rs4655200	1	20672101	KIF17	recessive_dominant	0.0166482	0.0410655	2.50339	0.395339	protective	NA
KEGG_NEUROTROPHIN_SIGNALING_PATHWAY	REACTOME_ORGANELLE_BIOGENESIS_AND_MAINTENANCE	rs112761996	7	6329248	RAC1	rs73886521	22	46273829	PPARA	dominant	0.00665927	0.0244173	2.49931	0.267852	protective	NA
KEGG_NEUROTROPHIN_SIGNALING_PATHWAY	REACTOME_ORGANELLE_BIOGENESIS_AND_MAINTENANCE	rs998521	15	66407072	MAP2K1	rs7438356	4	15624770	CC2D2A	dominant	0.204218	0.265261	2.49334	0.710819	protective	NA
KEGG_NEUROTROPHIN_SIGNALING_PATHWAY	REACTOME_ORGANELLE_BIOGENESIS_AND_MAINTENANCE	rs1245510	10	73799959	CAMK2G	rs7247709	19	52240015	PPP2R1A	dominant	0.422863	0.489456	2.49222	0.76426	protective	NA
KEGG_NEUROTROPHIN_SIGNALING_PATHWAY	REACTOME_ORGANELLE_BIOGENESIS_AND_MAINTENANCE	rs8073151	17	1495834	CRK	rs11287280	3	45836823	LZTFL1	recessive_dominant	0.0122087	0.0344062	2.48512	0.346865	protective	NA
KEGG_NEUROTROPHIN_SIGNALING_PATHWAY	REACTOME_ORGANELLE_BIOGENESIS_AND_MAINTENANCE	rs2908290	7	44216137	CAMK2B	rs6534321	4	122692023	BBS12	dominant	0.204218	0.261931	2.48375	0.723117	protective	NA
KEGG_NEUROTROPHIN_SIGNALING_PATHWAY	REACTOME_ORGANELLE_BIOGENESIS_AND_MAINTENANCE	rs13322072	3	179282730	PIK3CA	rs6432044	2	10041284	CYS1	recessive_dominant	0.0854606	0.130966	2.47761	0.620074	protective	NA
KEGG_NEUROTROPHIN_SIGNALING_PATHWAY	REACTOME_ORGANELLE_BIOGENESIS_AND_MAINTENANCE	rs7805383	7	140908104	BRAF	rs10402773	19	33004535	CEP89	dominant	0.469478	0.536071	2.47291	0.765846	protective	NA
KEGG_NEUROTROPHIN_SIGNALING_PATHWAY	REACTOME_ORGANELLE_BIOGENESIS_AND_MAINTENANCE	rs1245510	10	73799959	CAMK2G	rs62151837	2	73390396	ALMS1	dominant	0.368479	0.437292	2.47118	0.750823	protective	NA
KEGG_NEUROTROPHIN_SIGNALING_PATHWAY	REACTOME_ORGANELLE_BIOGENESIS_AND_MAINTENANCE	rs1245510	10	73799959	CAMK2G	rs10402773	19	33004535	CEP89	dominant	0.45616	0.522752	2.4709	0.765761	protective	NA
KEGG_NEUROTROPHIN_SIGNALING_PATHWAY	REACTOME_ORGANELLE_BIOGENESIS_AND_MAINTENANCE	rs56002030	19	49073984	NTF4	rs536327334	13	20581760	IFT88	recessive	0.0188679	0.045505	2.46696	0.403377	protective	NA
KEGG_NEUROTROPHIN_SIGNALING_PATHWAY	REACTOME_ORGANELLE_BIOGENESIS_AND_MAINTENANCE	rs557328	19	7902965	MAP2K7	rs7966731	12	96871649	NEDD1	dominant	0.310766	0.378468	2.46245	0.740457	protective	NA
KEGG_NEUROTROPHIN_SIGNALING_PATHWAY	REACTOME_ORGANELLE_BIOGENESIS_AND_MAINTENANCE	rs13322072	3	179282730	PIK3CA	rs4287754	2	61906147	CCT4	recessive_dominant	0.0344062	0.0665927	2.45868	0.499444	protective	NA
KEGG_NEUROTROPHIN_SIGNALING_PATHWAY	REACTOME_ORGANELLE_BIOGENESIS_AND_MAINTENANCE	rs3128321	1	1953252	CALML6	rs553512184	1	153989995	CRTC2	recessive	0.00110988	0.0144284	2.45841	0.0758974	protective	4.824e-04
KEGG_NEUROTROPHIN_SIGNALING_PATHWAY	REACTOME_ORGANELLE_BIOGENESIS_AND_MAINTENANCE	rs998521	15	66407072	MAP2K1	rs6593798	1	147135704	PRKAB2	dominant	0.134295	0.188679	2.45428	0.667051	protective	NA
KEGG_NEUROTROPHIN_SIGNALING_PATHWAY	REACTOME_ORGANELLE_BIOGENESIS_AND_MAINTENANCE	rs325923	1	111691513	RAP1A	rs6432044	2	10041284	CYS1	recessive_dominant	0.0987791	0.144284	2.45187	0.650047	protective	NA
KEGG_NEUROTROPHIN_SIGNALING_PATHWAY	REACTOME_ORGANELLE_BIOGENESIS_AND_MAINTENANCE	rs7805383	7	140908104	BRAF	rs4959880	6	442206	EXOC2	dominant	0.340733	0.405105	2.44412	0.758969	protective	NA
KEGG_NEUROTROPHIN_SIGNALING_PATHWAY	REACTOME_ORGANELLE_BIOGENESIS_AND_MAINTENANCE	rs11102837	1	115346655	NGF	rs4959880	6	442206	EXOC2	dominant	0.293008	0.36071	2.44376	0.73452	protective	NA
KEGG_NEUROTROPHIN_SIGNALING_PATHWAY	REACTOME_ORGANELLE_BIOGENESIS_AND_MAINTENANCE	rs4877972	9	88989455	SHC3	rs16996724	22	36772774	IFT27	dominant	0.0665927	0.106548	2.44257	0.598246	protective	NA
KEGG_NEUROTROPHIN_SIGNALING_PATHWAY	REACTOME_ORGANELLE_BIOGENESIS_AND_MAINTENANCE	rs111530414	5	56815966	MAP3K1	rs73094828	20	32316895	KIF3B	dominant	0.0233074	0.0499445	2.44237	0.453939	protective	NA
KEGG_NEUROTROPHIN_SIGNALING_PATHWAY	REACTOME_ORGANELLE_BIOGENESIS_AND_MAINTENANCE	rs2169633	15	66467291	MAP2K1	rs10402773	19	33004535	CEP89	recessive	0.0288568	0.0566038	2.43921	0.495238	protective	NA
KEGG_NEUROTROPHIN_SIGNALING_PATHWAY	REACTOME_ORGANELLE_BIOGENESIS_AND_MAINTENANCE	rs7805383	7	140908104	BRAF	rs9294982	6	169696898	TCTE3	recessive_dominant	0.134295	0.18313	2.43103	0.691966	protective	NA
KEGG_NEUROTROPHIN_SIGNALING_PATHWAY	REACTOME_ORGANELLE_BIOGENESIS_AND_MAINTENANCE	rs9347129	6	166895934	RPS6KA2	rs4936388	11	117440404	CEP164	recessive_dominant	0.00554939	0.0221976	2.41618	0.245815	protective	NA
KEGG_NEUROTROPHIN_SIGNALING_PATHWAY	REACTOME_ORGANELLE_BIOGENESIS_AND_MAINTENANCE	rs557328	19	7902965	MAP2K7	rs6432044	2	10041284	CYS1	dominant	0.288568	0.350721	2.41525	0.750903	protective	NA
KEGG_NEUROTROPHIN_SIGNALING_PATHWAY	REACTOME_ORGANELLE_BIOGENESIS_AND_MAINTENANCE	rs4791329	17	7693455	TP53	rs528424379	16	23661801	PLK1	recessive_dominant	0.0199778	0.045505	2.40922	0.427589	protective	NA
KEGG_NEUROTROPHIN_SIGNALING_PATHWAY	REACTOME_ORGANELLE_BIOGENESIS_AND_MAINTENANCE	rs1245510	10	73799959	CAMK2G	rs533119830	22	40656205	MCHR1	recessive_dominant	0.063263	0.100999	2.40854	0.601141	protective	NA
KEGG_NEUROTROPHIN_SIGNALING_PATHWAY	REACTOME_ORGANELLE_BIOGENESIS_AND_MAINTENANCE	rs9347129	6	166895934	RPS6KA2	rs2234182	19	6535080	TUBB4A	recessive_dominant	0.0133185	0.0344062	2.4001	0.378824	protective	NA
KEGG_NEUROTROPHIN_SIGNALING_PATHWAY	REACTOME_ORGANELLE_BIOGENESIS_AND_MAINTENANCE	rs7033070	9	131586374	RAPGEF1	rs6432044	2	10041284	CYS1	recessive_dominant	0.0776915	0.119867	2.39996	0.61851	protective	NA
KEGG_NEUROTROPHIN_SIGNALING_PATHWAY	REACTOME_ORGANELLE_BIOGENESIS_AND_MAINTENANCE	rs557328	19	7902965	MAP2K7	rs10402773	19	33004535	CEP89	dominant	0.324084	0.387347	2.39335	0.758367	protective	3.731e-04
KEGG_NEUROTROPHIN_SIGNALING_PATHWAY	REACTOME_ORGANELLE_BIOGENESIS_AND_MAINTENANCE	rs557328	19	7902965	MAP2K7	rs77793021	14	22943872	HAUS4	recessive_dominant	0.0099889	0.0299667	2.39053	0.326607	protective	NA
KEGG_NEUROTROPHIN_SIGNALING_PATHWAY	REACTOME_ORGANELLE_BIOGENESIS_AND_MAINTENANCE	rs1902716	10	48395086	MAPK8	rs16996724	22	36772774	IFT27	dominant	0.036626	0.0699223	2.3774	0.505706	protective	NA
KEGG_NEUROTROPHIN_SIGNALING_PATHWAY	REACTOME_ORGANELLE_BIOGENESIS_AND_MAINTENANCE	rs557328	19	7902965	MAP2K7	rs62151837	2	73390396	ALMS1	dominant	0.27636	0.337403	2.37252	0.749985	protective	NA
KEGG_NEUROTROPHIN_SIGNALING_PATHWAY	REACTOME_ORGANELLE_BIOGENESIS_AND_MAINTENANCE	rs529025836	17	63636272	MAP3K3	rs71626264	3	177098521	TBL1XR1	recessive_dominant	0.120977	0.167592	2.36326	0.683574	protective	NA
KEGG_NEUROTROPHIN_SIGNALING_PATHWAY	REACTOME_ORGANELLE_BIOGENESIS_AND_MAINTENANCE	rs7805383	7	140908104	BRAF	rs2790035	9	128439923	ODF2	recessive_dominant	0.133185	0.18091	2.363	0.695663	protective	NA
KEGG_NEUROTROPHIN_SIGNALING_PATHWAY	REACTOME_ORGANELLE_BIOGENESIS_AND_MAINTENANCE	rs13322072	3	179282730	PIK3CA	rs7798741	7	33585000	BBS9	dominant	0.408435	0.473918	2.35792	0.766427	protective	NA
KEGG_NEUROTROPHIN_SIGNALING_PATHWAY	REACTOME_ORGANELLE_BIOGENESIS_AND_MAINTENANCE	rs3844536	19	396948	SHC2	rs1396893	8	55779322	TGS1	recessive_dominant	0.0688124	0.106548	2.35717	0.619661	protective	NA
KEGG_NEUROTROPHIN_SIGNALING_PATHWAY	REACTOME_ORGANELLE_BIOGENESIS_AND_MAINTENANCE	rs13322072	3	179282730	PIK3CA	rs7438356	4	15624770	CC2D2A	dominant	0.375139	0.439512	2.34763	0.765605	protective	NA
KEGG_NEUROTROPHIN_SIGNALING_PATHWAY	REACTOME_ORGANELLE_BIOGENESIS_AND_MAINTENANCE	rs557328	19	7902965	MAP2K7	rs1917460	11	103527656	DYNC2H1	dominant	0.261931	0.321865	2.34019	0.747711	protective	NA
KEGG_NEUROTROPHIN_SIGNALING_PATHWAY	REACTOME_ORGANELLE_BIOGENESIS_AND_MAINTENANCE	rs2169633	15	66467291	MAP2K1	rs16996724	22	36772774	IFT27	dominant	0.0643729	0.103219	2.3395	0.597763	protective	NA
KEGG_NEUROTROPHIN_SIGNALING_PATHWAY	REACTOME_ORGANELLE_BIOGENESIS_AND_MAINTENANCE	rs7222654	17	8932404	PIK3R5	rs10883462	10	102095122	PPRC1	recessive	0	0.0110988	2.33891	0	protective	NA
KEGG_NEUROTROPHIN_SIGNALING_PATHWAY	REACTOME_ORGANELLE_BIOGENESIS_AND_MAINTENANCE	rs2075076	7	44274642	CAMK2B	rs1975944	12	69808396	RAB3IP	recessive	0.00221976	0.0155383	2.33333	0.14095	protective	NA
KEGG_NEUROTROPHIN_SIGNALING_PATHWAY	REACTOME_ORGANELLE_BIOGENESIS_AND_MAINTENANCE	rs557328	19	7902965	MAP2K7	rs553512184	1	153989995	CRTC2	dominant	0.329634	0.391787	2.32076	0.763353	protective	NA
KEGG_NEUROTROPHIN_SIGNALING_PATHWAY	REACTOME_ORGANELLE_BIOGENESIS_AND_MAINTENANCE	rs13322072	3	179282730	PIK3CA	rs10402773	19	33004535	CEP89	dominant	0.411765	0.476138	2.31571	0.770163	protective	NA
KEGG_NEUROTROPHIN_SIGNALING_PATHWAY	REACTOME_ORGANELLE_BIOGENESIS_AND_MAINTENANCE	rs529025836	17	63636272	MAP3K3	rs34782630	7	129593069	NRF1	recessive_dominant	0.054384	0.0899001	2.31463	0.582218	protective	NA
KEGG_NEUROTROPHIN_SIGNALING_PATHWAY	REACTOME_ORGANELLE_BIOGENESIS_AND_MAINTENANCE	rs557328	19	7902965	MAP2K7	rs57574050	17	76091089	EXOC7	recessive_dominant	0.00554939	0.0133185	2.31321	0.413411	protective	NA
KEGG_NEUROTROPHIN_SIGNALING_PATHWAY	REACTOME_ORGANELLE_BIOGENESIS_AND_MAINTENANCE	rs998521	15	66407072	MAP2K1	rs34487560	4	56029268	CEP135	dominant	0.216426	0.27636	2.31078	0.723233	protective	NA
KEGG_NEUROTROPHIN_SIGNALING_PATHWAY	REACTOME_ORGANELLE_BIOGENESIS_AND_MAINTENANCE	rs62315570	4	86331750	MAPK10	rs2489138	1	156526564	MEF2D	dominant	0.36182	0.426193	2.30812	0.763324	protective	NA
KEGG_NEUROTROPHIN_SIGNALING_PATHWAY	REACTOME_ORGANELLE_BIOGENESIS_AND_MAINTENANCE	rs2075076	7	44274642	CAMK2B	rs6432044	2	10041284	CYS1	recessive_dominant	0.0688124	0.108768	2.30018	0.605507	protective	NA
KEGG_NEUROTROPHIN_SIGNALING_PATHWAY	REACTOME_ORGANELLE_BIOGENESIS_AND_MAINTENANCE	rs2803965	14	73098014	PSEN1	rs11287280	3	45836823	LZTFL1	recessive_dominant	0.00332963	0.017758	2.29815	0.184786	protective	NA
KEGG_NEUROTROPHIN_SIGNALING_PATHWAY	REACTOME_ORGANELLE_BIOGENESIS_AND_MAINTENANCE	rs557328	19	7902965	MAP2K7	rs2489138	1	156526564	MEF2D	dominant	0.26859	0.329634	2.29755	0.746811	protective	NA
KEGG_NEUROTROPHIN_SIGNALING_PATHWAY	REACTOME_ORGANELLE_BIOGENESIS_AND_MAINTENANCE	rs17051913	9	89061524	SHC3	rs11168720	12	49146750	TUBA1A/TUBA1B	recessive_dominant	0.0421754	0.0732519	2.29496	0.557077	protective	NA
KEGG_NEUROTROPHIN_SIGNALING_PATHWAY	REACTOME_ORGANELLE_BIOGENESIS_AND_MAINTENANCE	rs998521	15	66407072	MAP2K1	rs896806	2	19961843	WDR35	dominant	0.219756	0.279689	2.29092	0.725361	protective	NA
KEGG_NEUROTROPHIN_SIGNALING_PATHWAY	REACTOME_ORGANELLE_BIOGENESIS_AND_MAINTENANCE	rs7805383	7	140908104	BRAF	rs1396893	8	55779322	TGS1	recessive_dominant	0.110988	0.155383	2.28442	0.678616	protective	NA
KEGG_NEUROTROPHIN_SIGNALING_PATHWAY	REACTOME_ORGANELLE_BIOGENESIS_AND_MAINTENANCE	rs55967668	5	68241438	PIK3R1	rs57574050	17	76091089	EXOC7	dominant	0.0677026	0.104329	2.284	0.623442	protective	NA
KEGG_NEUROTROPHIN_SIGNALING_PATHWAY	REACTOME_ORGANELLE_BIOGENESIS_AND_MAINTENANCE	rs2803965	14	73098014	PSEN1	rs10402773	19	33004535	CEP89	dominant	0.345172	0.407325	2.27808	0.766979	protective	NA
KEGG_NEUROTROPHIN_SIGNALING_PATHWAY	REACTOME_ORGANELLE_BIOGENESIS_AND_MAINTENANCE	rs3844536	19	396948	SHC2	rs16996724	22	36772774	IFT27	dominant	0.054384	0.09101	2.27786	0.574416	protective	NA
KEGG_NEUROTROPHIN_SIGNALING_PATHWAY	REACTOME_ORGANELLE_BIOGENESIS_AND_MAINTENANCE	rs62044000	16	81927776	PLCG2	rs11707509	3	196346629	TCTEX1D2	recessive_dominant	0.00776915	0.0266371	2.27592	0.28612	protective	NA
KEGG_NEUROTROPHIN_SIGNALING_PATHWAY	REACTOME_ORGANELLE_BIOGENESIS_AND_MAINTENANCE	rs1245510	10	73799959	CAMK2G	rs12761305	10	92814031	EXOC6	recessive_dominant	0.0976693	0.139845	2.27086	0.665769	protective	0.009
KEGG_NEUROTROPHIN_SIGNALING_PATHWAY	REACTOME_ORGANELLE_BIOGENESIS_AND_MAINTENANCE	rs11102837	1	115346655	NGF	rs2489138	1	156526564	MEF2D	dominant	0.340733	0.403996	2.26577	0.762474	protective	0.022
KEGG_NEUROTROPHIN_SIGNALING_PATHWAY	REACTOME_ORGANELLE_BIOGENESIS_AND_MAINTENANCE	rs6916254	6	136738115	MAP3K5	rs72742147	9	78289116	CEP78	dominant	0.017758	0.0399556	2.26211	0.434401	protective	NA
KEGG_NEUROTROPHIN_SIGNALING_PATHWAY	REACTOME_ORGANELLE_BIOGENESIS_AND_MAINTENANCE	rs998521	15	66407072	MAP2K1	rs7214893	17	76140308	EXOC7	dominant	0.192009	0.249723	2.25924	0.713968	protective	NA
KEGG_NEUROTROPHIN_SIGNALING_PATHWAY	REACTOME_ORGANELLE_BIOGENESIS_AND_MAINTENANCE	rs9347129	6	166895934	RPS6KA2	rs12935211	16	58015332	CNGB1	recessive_dominant	0.0144284	0.0355161	2.25696	0.397558	protective	NA
KEGG_NEUROTROPHIN_SIGNALING_PATHWAY	REACTOME_ORGANELLE_BIOGENESIS_AND_MAINTENANCE	rs11063604	12	5408423	NTF3	rs4726122	7	151675463	PRKAG2	recessive_dominant	0.0266371	0.0532741	2.2568	0.486317	protective	NA
KEGG_NEUROTROPHIN_SIGNALING_PATHWAY	REACTOME_ORGANELLE_BIOGENESIS_AND_MAINTENANCE	rs529025836	17	63636272	MAP3K3	rs9348164	6	167071948	FGFR1OP	recessive_dominant	0.117647	0.162042	2.2501	0.689498	protective	NA
KEGG_NEUROTROPHIN_SIGNALING_PATHWAY	REACTOME_ORGANELLE_BIOGENESIS_AND_MAINTENANCE	rs12923110	16	81885762	PLCG2	rs71421442	14	57152633	EXOC5	recessive	0.00554939	0.0221976	2.24099	0.245815	protective	NA
KEGG_NEUROTROPHIN_SIGNALING_PATHWAY	REACTOME_ORGANELLE_BIOGENESIS_AND_MAINTENANCE	rs4791329	17	7693455	TP53	rs9975804	21	29058105	CCT8	recessive_dominant	0.0554939	0.0932297	2.24054	0.571457	protective	NA
KEGG_NEUROTROPHIN_SIGNALING_PATHWAY	REACTOME_ORGANELLE_BIOGENESIS_AND_MAINTENANCE	rs9786966	1	3623414	TP73	rs200502024	3	121820354	IQCB1	recessive_dominant	0.0099889	0.0288568	2.2403	0.339557	protective	NA
KEGG_NEUROTROPHIN_SIGNALING_PATHWAY	REACTOME_ORGANELLE_BIOGENESIS_AND_MAINTENANCE	rs62315570	4	86331750	MAPK10	rs34144731	4	55921913	CEP135/EXOC1	recessive_dominant	0.00554939	0.0221976	2.23819	0.245815	protective	0.003
KEGG_NEUROTROPHIN_SIGNALING_PATHWAY	REACTOME_ORGANELLE_BIOGENESIS_AND_MAINTENANCE	rs12950747	17	8996860	PIK3R5	rs17017668	1	211694508	NEK2	dominant	0.00665927	0.0233074	2.23063	0.280926	protective	NA
KEGG_NEUROTROPHIN_SIGNALING_PATHWAY	REACTOME_ORGANELLE_BIOGENESIS_AND_MAINTENANCE	rs1902716	10	48395086	MAPK8	rs12761305	10	92814031	EXOC6	recessive_dominant	0.0654828	0.102109	2.22992	0.61617	protective	7.584e-04
KEGG_NEUROTROPHIN_SIGNALING_PATHWAY	REACTOME_ORGANELLE_BIOGENESIS_AND_MAINTENANCE	rs1007802	1	206735691	MAPKAPK2	rs4936388	11	117440404	CEP164	recessive	0.00332963	0.017758	2.22751	0.184786	protective	NA
KEGG_NEUROTROPHIN_SIGNALING_PATHWAY	REACTOME_ORGANELLE_BIOGENESIS_AND_MAINTENANCE	rs34137352	1	3694480	TP73	rs34144731	4	55921913	CEP135/EXOC1	recessive_dominant	0.00110988	0.0133185	2.22349	0.0823148	protective	NA
KEGG_NEUROTROPHIN_SIGNALING_PATHWAY	REACTOME_ORGANELLE_BIOGENESIS_AND_MAINTENANCE	rs629608	1	111738116	RAP1A	rs76940793	3	160447833	IFT80	recessive_dominant	0.00554939	0.0210877	2.22267	0.259046	protective	NA
KEGG_NEUROTROPHIN_SIGNALING_PATHWAY	REACTOME_ORGANELLE_BIOGENESIS_AND_MAINTENANCE	rs7805383	7	140908104	BRAF	rs71421442	14	57152633	EXOC5	recessive_dominant	0.0532741	0.0865705	2.22058	0.593742	protective	NA
KEGG_NEUROTROPHIN_SIGNALING_PATHWAY	REACTOME_ORGANELLE_BIOGENESIS_AND_MAINTENANCE	rs55702801	14	73255495	PSEN1	rs7214893	17	76140308	EXOC7	dominant	0.145394	0.193119	2.21354	0.71083	protective	NA
KEGG_NEUROTROPHIN_SIGNALING_PATHWAY	REACTOME_ORGANELLE_BIOGENESIS_AND_MAINTENANCE	rs56002030	19	49073984	NTF4	rs17166570	5	132660439	KIF3A	dominant	0.0554939	0.09101	2.21317	0.586828	protective	NA
KEGG_NEUROTROPHIN_SIGNALING_PATHWAY	REACTOME_ORGANELLE_BIOGENESIS_AND_MAINTENANCE	rs2908290	7	44216137	CAMK2B	rs17166570	5	132660439	KIF3A	dominant	0.0621532	0.0987791	2.21246	0.604641	protective	NA
KEGG_NEUROTROPHIN_SIGNALING_PATHWAY	REACTOME_ORGANELLE_BIOGENESIS_AND_MAINTENANCE	rs1245510	10	73799959	CAMK2G	rs7966731	12	96871649	NEDD1	recessive	0.0388457	0.0688124	2.2116	0.546916	protective	NA
KEGG_NEUROTROPHIN_SIGNALING_PATHWAY	REACTOME_ORGANELLE_BIOGENESIS_AND_MAINTENANCE	rs2908290	7	44216137	CAMK2B	rs201143490	9	136452021	INPP5E	recessive_dominant	0.0865705	0.126526	2.20527	0.654282	protective	NA
KEGG_NEUROTROPHIN_SIGNALING_PATHWAY	REACTOME_ORGANELLE_BIOGENESIS_AND_MAINTENANCE	rs78011207	2	226712412	IRS1	rs890980	5	477303	EXOC3	recessive	0.00887902	0.0288568	2.20358	0.30149	protective	NA
KEGG_NEUROTROPHIN_SIGNALING_PATHWAY	REACTOME_ORGANELLE_BIOGENESIS_AND_MAINTENANCE	rs998521	15	66407072	MAP2K1	rs10418927	19	16168734	RAB8A	dominant	0.217536	0.27636	2.19867	0.727973	protective	NA
KEGG_NEUROTROPHIN_SIGNALING_PATHWAY	REACTOME_ORGANELLE_BIOGENESIS_AND_MAINTENANCE	rs557328	19	7902965	MAP2K7	rs12935211	16	58015332	CNGB1	recessive	0.0144284	0.0355161	2.19776	0.397558	protective	NA
KEGG_NEUROTROPHIN_SIGNALING_PATHWAY	REACTOME_ORGANELLE_BIOGENESIS_AND_MAINTENANCE	rs557328	19	7902965	MAP2K7	rs533119830	22	40656205	MCHR1	recessive_dominant	0.0677026	0.103219	2.19577	0.630927	protective	NA
KEGG_NEUROTROPHIN_SIGNALING_PATHWAY	REACTOME_ORGANELLE_BIOGENESIS_AND_MAINTENANCE	rs557328	19	7902965	MAP2K7	rs28716841	5	132733467	KIF3A	dominant	0.0388457	0.0721421	2.19556	0.519808	protective	NA
KEGG_NEUROTROPHIN_SIGNALING_PATHWAY	REACTOME_ORGANELLE_BIOGENESIS_AND_MAINTENANCE	rs557328	19	7902965	MAP2K7	rs17166570	5	132660439	KIF3A	dominant	0.0432852	0.0776915	2.19233	0.537106	protective	NA
KEGG_NEUROTROPHIN_SIGNALING_PATHWAY	REACTOME_ORGANELLE_BIOGENESIS_AND_MAINTENANCE	rs139443871	19	4165336	MAP2K2	rs3858285	10	92955129	EXOC6	recessive_dominant	0.0876804	0.128746	2.18672	0.65038	protective	NA
KEGG_NEUROTROPHIN_SIGNALING_PATHWAY	REACTOME_ORGANELLE_BIOGENESIS_AND_MAINTENANCE	rs10772805	12	14912466	ARHGDIB	rs34144731	4	55921913	CEP135/EXOC1	recessive_dominant	0.00554939	0.0221976	2.18533	0.245815	protective	NA
KEGG_NEUROTROPHIN_SIGNALING_PATHWAY	REACTOME_ORGANELLE_BIOGENESIS_AND_MAINTENANCE	rs4820983	22	31929654	YWHAH	rs2065994	1	243265536	SDCCAG8	recessive	0.0244173	0.0499445	2.18519	0.476097	protective	NA
KEGG_NEUROTROPHIN_SIGNALING_PATHWAY	REACTOME_ORGANELLE_BIOGENESIS_AND_MAINTENANCE	rs1018102	1	22041073	CDC42	rs2655172	8	70154581	NCOA2	recessive_dominant	0.116537	0.165372	2.18247	0.665745	protective	NA
KEGG_NEUROTROPHIN_SIGNALING_PATHWAY	REACTOME_ORGANELLE_BIOGENESIS_AND_MAINTENANCE	rs2803965	14	73098014	PSEN1	rs57156634	11	103446048	DYNC2H1	recessive_dominant	0.0110988	0.0299667	2.1815	0.363304	protective	NA
KEGG_NEUROTROPHIN_SIGNALING_PATHWAY	REACTOME_ORGANELLE_BIOGENESIS_AND_MAINTENANCE	rs8142362	22	20979079	CRKL	rs4655200	1	20672101	KIF17	dominant	0.225305	0.283019	2.17831	0.736772	protective	NA
KEGG_NEUROTROPHIN_SIGNALING_PATHWAY	REACTOME_ORGANELLE_BIOGENESIS_AND_MAINTENANCE	rs3844536	19	396948	SHC2	rs73054883	19	52207932	PPP2R1A	recessive_dominant	0.00110988	0.0133185	2.17704	0.0823148	protective	0.003
KEGG_NEUROTROPHIN_SIGNALING_PATHWAY	REACTOME_ORGANELLE_BIOGENESIS_AND_MAINTENANCE	rs59425633	2	9585705	YWHAQ	rs73916491	20	59046695	TUBB1	dominant	0.0133185	0.0332963	2.17687	0.391901	protective	NA
KEGG_NEUROTROPHIN_SIGNALING_PATHWAY	REACTOME_ORGANELLE_BIOGENESIS_AND_MAINTENANCE	rs56002030	19	49073984	NTF4	rs34144731	4	55921913	CEP135/EXOC1	recessive_dominant	0.00776915	0.0266371	2.17264	0.28612	protective	NA
KEGG_NEUROTROPHIN_SIGNALING_PATHWAY	REACTOME_ORGANELLE_BIOGENESIS_AND_MAINTENANCE	rs2224949	14	50096560	SOS2	rs7562959	2	121577641	CLASP1	recessive_dominant	0.00110988	0.0122087	2.17235	0.089899	protective	NA
KEGG_NEUROTROPHIN_SIGNALING_PATHWAY	REACTOME_ORGANELLE_BIOGENESIS_AND_MAINTENANCE	rs7805383	7	140908104	BRAF	rs2021883	7	33122453	BBS9	recessive_dominant	0.140954	0.190899	2.17103	0.695443	protective	1.487e-04
KEGG_NEUROTROPHIN_SIGNALING_PATHWAY	REACTOME_ORGANELLE_BIOGENESIS_AND_MAINTENANCE	rs2517	9	130855035	ABL1	rs11432188	9	34575985	DCTN3	dominant	0.0876804	0.126526	2.17003	0.663476	protective	3.206e-04
KEGG_NEUROTROPHIN_SIGNALING_PATHWAY	REACTOME_ORGANELLE_BIOGENESIS_AND_MAINTENANCE	rs8073151	17	1495834	CRK	rs2130923	4	23781504	PPARGC1A	recessive_dominant	0.0721421	0.108768	2.16935	0.637084	protective	NA
KEGG_NEUROTROPHIN_SIGNALING_PATHWAY	REACTOME_ORGANELLE_BIOGENESIS_AND_MAINTENANCE	rs7222654	17	8932404	PIK3R5	rs10402773	19	33004535	CEP89	recessive	0.00110988	0.0122087	2.16712	0.089899	protective	NA
KEGG_NEUROTROPHIN_SIGNALING_PATHWAY	REACTOME_ORGANELLE_BIOGENESIS_AND_MAINTENANCE	rs998521	15	66407072	MAP2K1	rs536327334	13	20581760	IFT88	dominant	0.243063	0.302997	2.16292	0.738681	protective	NA
KEGG_NEUROTROPHIN_SIGNALING_PATHWAY	REACTOME_ORGANELLE_BIOGENESIS_AND_MAINTENANCE	rs998521	15	66407072	MAP2K1	rs533119830	22	40656205	MCHR1	dominant	0.190899	0.247503	2.1599	0.717341	protective	NA
KEGG_NEUROTROPHIN_SIGNALING_PATHWAY	REACTOME_ORGANELLE_BIOGENESIS_AND_MAINTENANCE	rs1007802	1	206735691	MAPKAPK2	rs73054883	19	52207932	PPP2R1A	recessive_dominant	0.00332963	0.0166482	2.1569	0.197327	protective	NA
KEGG_NEUROTROPHIN_SIGNALING_PATHWAY	REACTOME_ORGANELLE_BIOGENESIS_AND_MAINTENANCE	rs201635960	5	180199887	MAPK9	rs71421442	14	57152633	EXOC5	recessive_dominant	0.0377358	0.0665927	2.15546	0.549673	protective	NA
KEGG_NEUROTROPHIN_SIGNALING_PATHWAY	REACTOME_ORGANELLE_BIOGENESIS_AND_MAINTENANCE	rs1007802	1	206735691	MAPKAPK2	rs4655200	1	20672101	KIF17	recessive_dominant	0.0521643	0.0843507	2.14575	0.597421	protective	2.275e-04
KEGG_NEUROTROPHIN_SIGNALING_PATHWAY	REACTOME_ORGANELLE_BIOGENESIS_AND_MAINTENANCE	rs2169633	15	66467291	MAP2K1	rs7247709	19	52240015	PPP2R1A	dominant	0.381798	0.442841	2.14574	0.777023	protective	NA
KEGG_NEUROTROPHIN_SIGNALING_PATHWAY	REACTOME_ORGANELLE_BIOGENESIS_AND_MAINTENANCE	rs111530414	5	56815966	MAP3K1	rs10460000	18	12320551	TUBB6	recessive_dominant	0.0155383	0.036626	2.1449	0.415155	protective	NA
KEGG_NEUROTROPHIN_SIGNALING_PATHWAY	REACTOME_ORGANELLE_BIOGENESIS_AND_MAINTENANCE	rs8073151	17	1495834	CRK	rs10402773	19	33004535	CEP89	recessive_dominant	0.169811	0.220866	2.14436	0.721562	protective	NA
KEGG_NEUROTROPHIN_SIGNALING_PATHWAY	REACTOME_ORGANELLE_BIOGENESIS_AND_MAINTENANCE	rs2087072	1	243829549	AKT3	rs277552	2	121632454	CLASP1	recessive	0.0166482	0.0388457	2.13758	0.418897	protective	NA
KEGG_NEUROTROPHIN_SIGNALING_PATHWAY	REACTOME_ORGANELLE_BIOGENESIS_AND_MAINTENANCE	rs68104879	17	8896949	PIK3R5	rs6534321	4	122692023	BBS12	recessive_dominant	0.0110988	0.0310766	2.13544	0.349928	protective	NA
KEGG_NEUROTROPHIN_SIGNALING_PATHWAY	REACTOME_ORGANELLE_BIOGENESIS_AND_MAINTENANCE	rs557328	19	7902965	MAP2K7	rs2234182	19	6535080	TUBB4A	dominant	0.253052	0.309656	2.1285	0.755276	protective	6.330e-05
KEGG_NEUROTROPHIN_SIGNALING_PATHWAY	REACTOME_ORGANELLE_BIOGENESIS_AND_MAINTENANCE	rs10806852	6	166864334	RPS6KA2	rs37815	16	3455912	CLUAP1	dominant	0.0732519	0.109878	2.127	0.640319	protective	NA
KEGG_NEUROTROPHIN_SIGNALING_PATHWAY	REACTOME_ORGANELLE_BIOGENESIS_AND_MAINTENANCE	rs7076160	10	48473929	MAPK8	rs10883462	10	102095122	PPRC1	recessive_dominant	0.0721421	0.108768	2.12399	0.637084	protective	1.967e-05
KEGG_NEUROTROPHIN_SIGNALING_PATHWAY	REACTOME_ORGANELLE_BIOGENESIS_AND_MAINTENANCE	rs34137352	1	3694480	TP73	rs2065994	1	243265536	SDCCAG8	recessive_dominant	0.0321865	0.0599334	2.12244	0.52164	protective	0.003
KEGG_NEUROTROPHIN_SIGNALING_PATHWAY	REACTOME_ORGANELLE_BIOGENESIS_AND_MAINTENANCE	rs4307417	9	89218258	SHC3	rs57574050	17	76091089	EXOC7	recessive	0	0.00887902	2.11399	0	protective	NA
KEGG_NEUROTROPHIN_SIGNALING_PATHWAY	REACTOME_ORGANELLE_BIOGENESIS_AND_MAINTENANCE	rs9347129	6	166895934	RPS6KA2	rs11896513	2	219219183	TUBA4A/TUBA4B	dominant	0.0244173	0.0488346	2.11398	0.487486	protective	NA
KEGG_NEUROTROPHIN_SIGNALING_PATHWAY	REACTOME_ORGANELLE_BIOGENESIS_AND_MAINTENANCE	rs4820983	22	31929654	YWHAH	rs71626264	3	177098521	TBL1XR1	recessive	0.036626	0.0643729	2.11388	0.552578	protective	NA
KEGG_NEUROTROPHIN_SIGNALING_PATHWAY	REACTOME_ORGANELLE_BIOGENESIS_AND_MAINTENANCE	rs28574697	19	48959488	BAX	rs2018797	7	129210004	SMO	recessive_dominant	0.0277469	0.054384	2.11327	0.496226	protective	NA
KEGG_NEUROTROPHIN_SIGNALING_PATHWAY	REACTOME_ORGANELLE_BIOGENESIS_AND_MAINTENANCE	rs12337518	9	84884971	NTRK2	rs74183366	19	35674986	HAUS5	recessive_dominant	0.00776915	0.0255272	2.11091	0.298901	protective	NA
KEGG_NEUROTROPHIN_SIGNALING_PATHWAY	REACTOME_ORGANELLE_BIOGENESIS_AND_MAINTENANCE	rs7805383	7	140908104	BRAF	rs6593798	1	147135704	PRKAB2	recessive_dominant	0.0743618	0.112098	2.1097	0.636323	protective	NA
KEGG_NEUROTROPHIN_SIGNALING_PATHWAY	REACTOME_ORGANELLE_BIOGENESIS_AND_MAINTENANCE	rs2227485	12	68647713	RAP1B	rs73054883	19	52207932	PPP2R1A	recessive_dominant	0.00221976	0.0144284	2.1069	0.151964	protective	NA
KEGG_NEUROTROPHIN_SIGNALING_PATHWAY	REACTOME_ORGANELLE_BIOGENESIS_AND_MAINTENANCE	rs4877972	9	88989455	SHC3	rs12761305	10	92814031	EXOC6	dominant	0.422863	0.482797	2.10483	0.784907	protective	NA
KEGG_NEUROTROPHIN_SIGNALING_PATHWAY	REACTOME_ORGANELLE_BIOGENESIS_AND_MAINTENANCE	rs55894401	16	81730962	PLCG2	rs12819938	12	119702178	PRKAB1	recessive	0.0155383	0.036626	2.10459	0.415155	protective	NA
KEGG_NEUROTROPHIN_SIGNALING_PATHWAY	REACTOME_ORGANELLE_BIOGENESIS_AND_MAINTENANCE	rs529025836	17	63636272	MAP3K3	rs4917904	10	102447292	ACTR1A	recessive_dominant	0.0854606	0.124306	2.10054	0.658298	protective	NA
KEGG_NEUROTROPHIN_SIGNALING_PATHWAY	REACTOME_ORGANELLE_BIOGENESIS_AND_MAINTENANCE	rs2087072	1	243829549	AKT3	rs2790035	9	128439923	ODF2	recessive_dominant	0.123196	0.166482	2.09884	0.703468	protective	NA
KEGG_NEUROTROPHIN_SIGNALING_PATHWAY	REACTOME_ORGANELLE_BIOGENESIS_AND_MAINTENANCE	rs6924899	6	166476996	RPS6KA2	rs17166570	5	132660439	KIF3A	dominant	0.0477248	0.0810211	2.09843	0.568445	protective	NA
KEGG_NEUROTROPHIN_SIGNALING_PATHWAY	REACTOME_ORGANELLE_BIOGENESIS_AND_MAINTENANCE	rs56002030	19	49073984	NTF4	rs2847251	18	12751036	CEP76	recessive_dominant	0.0310766	0.0588235	2.09826	0.513173	protective	NA
KEGG_NEUROTROPHIN_SIGNALING_PATHWAY	REACTOME_ORGANELLE_BIOGENESIS_AND_MAINTENANCE	rs7482257	11	27755298	BDNF	rs7438356	4	15624770	CC2D2A	recessive	0.0244173	0.0488346	2.09757	0.487486	protective	NA
KEGG_NEUROTROPHIN_SIGNALING_PATHWAY	REACTOME_ORGANELLE_BIOGENESIS_AND_MAINTENANCE	rs2075076	7	44274642	CAMK2B	rs2847251	18	12751036	CEP76	recessive_dominant	0.0244173	0.0488346	2.09757	0.487486	protective	NA
KEGG_NEUROTROPHIN_SIGNALING_PATHWAY	REACTOME_ORGANELLE_BIOGENESIS_AND_MAINTENANCE	rs13322072	3	179282730	PIK3CA	rs553512184	1	153989995	CRTC2	dominant	0.405105	0.466149	2.09618	0.779873	protective	NA
KEGG_NEUROTROPHIN_SIGNALING_PATHWAY	REACTOME_ORGANELLE_BIOGENESIS_AND_MAINTENANCE	rs7805383	7	140908104	BRAF	rs11180783	12	76383340	BBS10	recessive_dominant	0.114317	0.158713	2.09432	0.684175	protective	NA
KEGG_NEUROTROPHIN_SIGNALING_PATHWAY	REACTOME_ORGANELLE_BIOGENESIS_AND_MAINTENANCE	rs8073151	17	1495834	CRK	rs2847251	18	12751036	CEP76	recessive_dominant	0.0321865	0.0599334	2.09424	0.52164	protective	NA
KEGG_NEUROTROPHIN_SIGNALING_PATHWAY	REACTOME_ORGANELLE_BIOGENESIS_AND_MAINTENANCE	rs55702801	14	73255495	PSEN1	rs7804751	7	151645370	PRKAG2	recessive_dominant	0.0599334	0.0954495	2.09361	0.604184	protective	NA
KEGG_NEUROTROPHIN_SIGNALING_PATHWAY	REACTOME_ORGANELLE_BIOGENESIS_AND_MAINTENANCE	rs4791329	17	7693455	TP53	rs4936388	11	117440404	CEP164	recessive_dominant	0.0166482	0.0310766	2.08858	0.527854	protective	NA
KEGG_NEUROTROPHIN_SIGNALING_PATHWAY	REACTOME_ORGANELLE_BIOGENESIS_AND_MAINTENANCE	rs2908290	7	44216137	CAMK2B	rs235301	21	46297256	PCNT	recessive_dominant	0.082131	0.120977	2.08713	0.650167	protective	NA
KEGG_NEUROTROPHIN_SIGNALING_PATHWAY	REACTOME_ORGANELLE_BIOGENESIS_AND_MAINTENANCE	rs112786844	11	565302	HRAS	rs17166570	5	132660439	KIF3A	dominant	0.0110988	0.0332963	2.08618	0.325851	protective	NA
KEGG_NEUROTROPHIN_SIGNALING_PATHWAY	REACTOME_ORGANELLE_BIOGENESIS_AND_MAINTENANCE	rs17051913	9	89061524	SHC3	rs11707509	3	196346629	TCTEX1D2	recessive_dominant	0.0443951	0.0743618	2.08604	0.578293	protective	NA
KEGG_NEUROTROPHIN_SIGNALING_PATHWAY	REACTOME_ORGANELLE_BIOGENESIS_AND_MAINTENANCE	rs2087072	1	243829549	AKT3	rs2655172	8	70154581	NCOA2	recessive_dominant	0.0954495	0.135405	2.08574	0.673781	protective	NA
KEGG_NEUROTROPHIN_SIGNALING_PATHWAY	REACTOME_ORGANELLE_BIOGENESIS_AND_MAINTENANCE	rs2803965	14	73098014	PSEN1	rs6432044	2	10041284	CYS1	recessive_dominant	0.0654828	0.103219	2.0837	0.608791	protective	NA
KEGG_NEUROTROPHIN_SIGNALING_PATHWAY	REACTOME_ORGANELLE_BIOGENESIS_AND_MAINTENANCE	rs998521	15	66407072	MAP2K1	rs2790035	9	128439923	ODF2	dominant	0.219756	0.277469	2.07945	0.733417	protective	NA
KEGG_NEUROTROPHIN_SIGNALING_PATHWAY	REACTOME_ORGANELLE_BIOGENESIS_AND_MAINTENANCE	rs111530414	5	56815966	MAP3K1	rs2072826	6	135253558	AHI1	dominant	0.0432852	0.0732519	2.07913	0.5724	protective	NA
KEGG_NEUROTROPHIN_SIGNALING_PATHWAY	REACTOME_ORGANELLE_BIOGENESIS_AND_MAINTENANCE	rs998521	15	66407072	MAP2K1	rs3806410	1	156337134	CCT3	dominant	0.159822	0.213097	2.0791	0.702444	protective	NA
KEGG_NEUROTROPHIN_SIGNALING_PATHWAY	REACTOME_ORGANELLE_BIOGENESIS_AND_MAINTENANCE	rs1902716	10	48395086	MAPK8	rs10402773	19	33004535	CEP89	dominant	0.27303	0.329634	2.07887	0.763791	protective	NA
KEGG_NEUROTROPHIN_SIGNALING_PATHWAY	REACTOME_ORGANELLE_BIOGENESIS_AND_MAINTENANCE	rs1007802	1	206735691	MAPKAPK2	rs6432044	2	10041284	CYS1	recessive_dominant	0.0976693	0.139845	2.0754	0.665769	protective	NA
KEGG_NEUROTROPHIN_SIGNALING_PATHWAY	REACTOME_ORGANELLE_BIOGENESIS_AND_MAINTENANCE	rs2169633	15	66467291	MAP2K1	rs2362419	12	94366781	CEP83	recessive	0.0166482	0.0377358	2.07199	0.431716	protective	NA
KEGG_NEUROTROPHIN_SIGNALING_PATHWAY	REACTOME_ORGANELLE_BIOGENESIS_AND_MAINTENANCE	rs56002030	19	49073984	NTF4	rs2072826	6	135253558	AHI1	dominant	0.322974	0.381798	2.07025	0.772431	protective	NA
KEGG_NEUROTROPHIN_SIGNALING_PATHWAY	REACTOME_ORGANELLE_BIOGENESIS_AND_MAINTENANCE	rs2227485	12	68647713	RAP1B	rs2655172	8	70154581	NCOA2	recessive_dominant	0.124306	0.173141	2.0688	0.677911	protective	NA
KEGG_NEUROTROPHIN_SIGNALING_PATHWAY	REACTOME_ORGANELLE_BIOGENESIS_AND_MAINTENANCE	rs3128321	1	1953252	CALML6	rs11287280	3	45836823	LZTFL1	recessive_dominant	0.00554939	0.0210877	2.06817	0.259046	protective	NA
KEGG_NEUROTROPHIN_SIGNALING_PATHWAY	REACTOME_ORGANELLE_BIOGENESIS_AND_MAINTENANCE	rs998521	15	66407072	MAP2K1	rs142436966	2	74351590	DCTN1	dominant	0.188679	0.244173	2.06814	0.719873	protective	NA
KEGG_NEUROTROPHIN_SIGNALING_PATHWAY	REACTOME_ORGANELLE_BIOGENESIS_AND_MAINTENANCE	rs12923110	16	81885762	PLCG2	rs4821542	22	37252918	SSTR3	recessive	0.00554939	0.0199778	2.06575	0.273748	protective	NA
KEGG_NEUROTROPHIN_SIGNALING_PATHWAY	REACTOME_ORGANELLE_BIOGENESIS_AND_MAINTENANCE	rs1007802	1	206735691	MAPKAPK2	rs6751305	2	61876220	CCT4	recessive	0.0355161	0.0654828	2.06561	0.525521	protective	NA
KEGG_NEUROTROPHIN_SIGNALING_PATHWAY	REACTOME_ORGANELLE_BIOGENESIS_AND_MAINTENANCE	rs55702801	14	73255495	PSEN1	rs2655172	8	70154581	NCOA2	dominant	0.153163	0.199778	2.06516	0.724465	protective	NA
KEGG_NEUROTROPHIN_SIGNALING_PATHWAY	REACTOME_ORGANELLE_BIOGENESIS_AND_MAINTENANCE	rs8073151	17	1495834	CRK	rs1396893	8	55779322	TGS1	recessive_dominant	0.126526	0.170921	2.06253	0.702635	protective	NA
KEGG_NEUROTROPHIN_SIGNALING_PATHWAY	REACTOME_ORGANELLE_BIOGENESIS_AND_MAINTENANCE	rs66508783	19	18115826	PIK3R2	rs6432044	2	10041284	CYS1	recessive_dominant	0.0677026	0.106548	2.06064	0.608941	protective	NA
KEGG_NEUROTROPHIN_SIGNALING_PATHWAY	REACTOME_ORGANELLE_BIOGENESIS_AND_MAINTENANCE	rs3844536	19	396948	SHC2	rs112830612	9	19007971	HAUS6	dominant	0.0954495	0.134295	2.06	0.680221	protective	NA
KEGG_NEUROTROPHIN_SIGNALING_PATHWAY	REACTOME_ORGANELLE_BIOGENESIS_AND_MAINTENANCE	rs55702801	14	73255495	PSEN1	rs17017668	1	211694508	NEK2	dominant	0.0244173	0.0510544	2.05849	0.465203	protective	NA
KEGG_NEUROTROPHIN_SIGNALING_PATHWAY	REACTOME_ORGANELLE_BIOGENESIS_AND_MAINTENANCE	rs557328	19	7902965	MAP2K7	rs1396893	8	55779322	TGS1	dominant	0.27525	0.331853	2.05787	0.764652	protective	NA
KEGG_NEUROTROPHIN_SIGNALING_PATHWAY	REACTOME_ORGANELLE_BIOGENESIS_AND_MAINTENANCE	rs56002030	19	49073984	NTF4	rs6751305	2	61876220	CCT4	dominant	0.490566	0.54939	2.05552	0.789824	protective	NA
KEGG_NEUROTROPHIN_SIGNALING_PATHWAY	REACTOME_ORGANELLE_BIOGENESIS_AND_MAINTENANCE	rs7497619	15	49007401	SHC4	rs28716841	5	132733467	KIF3A	dominant	0.0277469	0.0532741	2.05511	0.507158	protective	NA
KEGG_NEUROTROPHIN_SIGNALING_PATHWAY	REACTOME_ORGANELLE_BIOGENESIS_AND_MAINTENANCE	rs998521	15	66407072	MAP2K1	rs2388229	16	53556997	RPGRIP1L	dominant	0.224195	0.281909	2.05346	0.736113	protective	NA
KEGG_NEUROTROPHIN_SIGNALING_PATHWAY	REACTOME_ORGANELLE_BIOGENESIS_AND_MAINTENANCE	rs529025836	17	63636272	MAP3K3	rs6593798	1	147135704	PRKAB2	recessive_dominant	0.0810211	0.118757	2.05117	0.654228	protective	NA
KEGG_NEUROTROPHIN_SIGNALING_PATHWAY	REACTOME_ORGANELLE_BIOGENESIS_AND_MAINTENANCE	rs2224949	14	50096560	SOS2	rs7247709	19	52240015	PPP2R1A	dominant	0.411765	0.471698	2.0499	0.784	protective	NA
KEGG_NEUROTROPHIN_SIGNALING_PATHWAY	REACTOME_ORGANELLE_BIOGENESIS_AND_MAINTENANCE	rs139443871	19	4165336	MAP2K2	rs7798741	7	33585000	BBS9	recessive_dominant	0.103219	0.143174	2.04966	0.68881	protective	NA
KEGG_NEUROTROPHIN_SIGNALING_PATHWAY	REACTOME_ORGANELLE_BIOGENESIS_AND_MAINTENANCE	rs10772805	12	14912466	ARHGDIB	rs17166570	5	132660439	KIF3A	dominant	0.0599334	0.0954495	2.04953	0.604184	protective	NA
KEGG_NEUROTROPHIN_SIGNALING_PATHWAY	REACTOME_ORGANELLE_BIOGENESIS_AND_MAINTENANCE	rs7482257	11	27755298	BDNF	rs57574050	17	76091089	EXOC7	recessive_dominant	0.0399556	0.0677026	2.04943	0.573107	protective	NA
KEGG_NEUROTROPHIN_SIGNALING_PATHWAY	REACTOME_ORGANELLE_BIOGENESIS_AND_MAINTENANCE	rs1245510	10	73799959	CAMK2G	rs771795	3	101718657	CEP97	recessive	0.0332963	0.0599334	2.04913	0.540247	protective	NA
KEGG_NEUROTROPHIN_SIGNALING_PATHWAY	REACTOME_ORGANELLE_BIOGENESIS_AND_MAINTENANCE	rs529025836	17	63636272	MAP3K3	rs1611011	13	20695628	IFT88	recessive_dominant	0.107658	0.148724	2.04813	0.690568	protective	NA
KEGG_NEUROTROPHIN_SIGNALING_PATHWAY	REACTOME_ORGANELLE_BIOGENESIS_AND_MAINTENANCE	rs12425324	12	111407697	SH2B3	rs6961764	7	133131298	CHCHD3	recessive	0.0377358	0.0654828	2.04804	0.559654	protective	NA
KEGG_NEUROTROPHIN_SIGNALING_PATHWAY	REACTOME_ORGANELLE_BIOGENESIS_AND_MAINTENANCE	rs7222654	17	8932404	PIK3R5	rs2021883	7	33122453	BBS9	recessive_dominant	0.0499445	0.082131	2.04451	0.587506	protective	NA
KEGG_NEUROTROPHIN_SIGNALING_PATHWAY	REACTOME_ORGANELLE_BIOGENESIS_AND_MAINTENANCE	rs4791329	17	7693455	TP53	rs4726122	7	151675463	PRKAG2	recessive	0.0199778	0.0432852	2.04327	0.450562	protective	NA
KEGG_NEUROTROPHIN_SIGNALING_PATHWAY	REACTOME_ORGANELLE_BIOGENESIS_AND_MAINTENANCE	rs56002030	19	49073984	NTF4	rs71421442	14	57152633	EXOC5	dominant	0.3596	0.418424	2.04121	0.780475	protective	NA
KEGG_NEUROTROPHIN_SIGNALING_PATHWAY	REACTOME_ORGANELLE_BIOGENESIS_AND_MAINTENANCE	rs55894401	16	81730962	PLCG2	rs528424379	16	23661801	PLK1	dominant	0.082131	0.122087	2.0409	0.643443	protective	2.691e-05
KEGG_NEUROTROPHIN_SIGNALING_PATHWAY	REACTOME_ORGANELLE_BIOGENESIS_AND_MAINTENANCE	rs1007802	1	206735691	MAPKAPK2	rs11168720	12	49146750	TUBA1A/TUBA1B	recessive_dominant	0.0754717	0.110988	2.0407	0.653878	protective	NA
KEGG_NEUROTROPHIN_SIGNALING_PATHWAY	REACTOME_ORGANELLE_BIOGENESIS_AND_MAINTENANCE	rs557328	19	7902965	MAP2K7	rs4959880	6	442206	EXOC2	dominant	0.255272	0.310766	2.03993	0.760219	protective	NA
KEGG_NEUROTROPHIN_SIGNALING_PATHWAY	REACTOME_ORGANELLE_BIOGENESIS_AND_MAINTENANCE	rs1902716	10	48395086	MAPK8	rs71421442	14	57152633	EXOC5	dominant	0.194229	0.243063	2.03898	0.750657	protective	NA
KEGG_NEUROTROPHIN_SIGNALING_PATHWAY	REACTOME_ORGANELLE_BIOGENESIS_AND_MAINTENANCE	rs1245510	10	73799959	CAMK2G	rs71421442	14	57152633	EXOC5	dominant	0.288568	0.344062	2.03602	0.773288	protective	NA
KEGG_NEUROTROPHIN_SIGNALING_PATHWAY	REACTOME_ORGANELLE_BIOGENESIS_AND_MAINTENANCE	rs4144887	6	166747512	RPS6KA2	rs37815	16	3455912	CLUAP1	recessive_dominant	0.0133185	0.0321865	2.03536	0.40588	protective	NA
KEGG_NEUROTROPHIN_SIGNALING_PATHWAY	REACTOME_ORGANELLE_BIOGENESIS_AND_MAINTENANCE	rs998521	15	66407072	MAP2K1	rs62387366	6	13542137	SIRT5	recessive	0	0.00887902	2.03395	0	protective	NA
KEGG_NEUROTROPHIN_SIGNALING_PATHWAY	REACTOME_ORGANELLE_BIOGENESIS_AND_MAINTENANCE	rs998521	15	66407072	MAP2K1	rs2671332	11	103231440	DYNC2H1	dominant	0.209767	0.266371	2.03388	0.731092	protective	NA
KEGG_NEUROTROPHIN_SIGNALING_PATHWAY	REACTOME_ORGANELLE_BIOGENESIS_AND_MAINTENANCE	rs4307417	9	89218258	SHC3	rs200502024	3	121820354	IQCB1	recessive_dominant	0.0110988	0.0332963	2.03228	0.325851	protective	NA
KEGG_NEUROTROPHIN_SIGNALING_PATHWAY	REACTOME_ORGANELLE_BIOGENESIS_AND_MAINTENANCE	rs8142362	22	20979079	CRKL	rs4917904	10	102447292	ACTR1A	recessive_dominant	0.0266371	0.0510544	2.03208	0.508651	protective	NA
KEGG_NEUROTROPHIN_SIGNALING_PATHWAY	REACTOME_ORGANELLE_BIOGENESIS_AND_MAINTENANCE	rs7805383	7	140908104	BRAF	rs62151837	2	73390396	ALMS1	recessive_dominant	0.105438	0.146504	2.02893	0.686659	protective	NA
KEGG_NEUROTROPHIN_SIGNALING_PATHWAY	REACTOME_ORGANELLE_BIOGENESIS_AND_MAINTENANCE	rs7805383	7	140908104	BRAF	rs277552	2	121632454	CLASP1	recessive_dominant	0.0754717	0.110988	2.02881	0.653878	protective	NA
KEGG_NEUROTROPHIN_SIGNALING_PATHWAY	REACTOME_ORGANELLE_BIOGENESIS_AND_MAINTENANCE	rs62315570	4	86331750	MAPK10	rs10077397	5	88903298	MEF2C	recessive_dominant	0.054384	0.0865705	2.02817	0.606823	protective	NA
KEGG_NEUROTROPHIN_SIGNALING_PATHWAY	REACTOME_ORGANELLE_BIOGENESIS_AND_MAINTENANCE	rs12986190	19	40273038	AKT2	rs11707509	3	196346629	TCTEX1D2	recessive_dominant	0.0466149	0.0765816	2.02409	0.589563	protective	NA
KEGG_NEUROTROPHIN_SIGNALING_PATHWAY	REACTOME_ORGANELLE_BIOGENESIS_AND_MAINTENANCE	rs7222654	17	8932404	PIK3R5	rs11707509	3	196346629	TCTEX1D2	recessive_dominant	0.036626	0.0643729	2.02326	0.552578	protective	NA
KEGG_NEUROTROPHIN_SIGNALING_PATHWAY	REACTOME_ORGANELLE_BIOGENESIS_AND_MAINTENANCE	rs13322072	3	179282730	PIK3CA	rs55924499	7	151517706	PRKAG2	dominant	0.339623	0.398446	2.02323	0.776442	protective	NA
KEGG_NEUROTROPHIN_SIGNALING_PATHWAY	REACTOME_ORGANELLE_BIOGENESIS_AND_MAINTENANCE	rs56002030	19	49073984	NTF4	rs2790035	9	128439923	ODF2	dominant	0.493896	0.551609	2.02024	0.793268	protective	NA
KEGG_NEUROTROPHIN_SIGNALING_PATHWAY	REACTOME_ORGANELLE_BIOGENESIS_AND_MAINTENANCE	rs13322072	3	179282730	PIK3CA	rs7943261	11	95767956	CEP57	dominant	0.152053	0.200888	2.01712	0.713315	protective	NA
KEGG_NEUROTROPHIN_SIGNALING_PATHWAY	REACTOME_ORGANELLE_BIOGENESIS_AND_MAINTENANCE	rs6094276	20	44949946	YWHAB	rs2362419	12	94366781	CEP83	recessive	0.0099889	0.0277469	2.01681	0.353543	protective	NA
KEGG_NEUROTROPHIN_SIGNALING_PATHWAY	REACTOME_ORGANELLE_BIOGENESIS_AND_MAINTENANCE	rs1018102	1	22041073	CDC42	rs11168720	12	49146750	TUBA1A/TUBA1B	recessive_dominant	0.0732519	0.109878	2.01618	0.640319	protective	NA
KEGG_NEUROTROPHIN_SIGNALING_PATHWAY	REACTOME_ORGANELLE_BIOGENESIS_AND_MAINTENANCE	rs4877972	9	88989455	SHC3	rs2489138	1	156526564	MEF2D	dominant	0.422863	0.483907	2.01502	0.781426	protective	NA
KEGG_NEUROTROPHIN_SIGNALING_PATHWAY	REACTOME_ORGANELLE_BIOGENESIS_AND_MAINTENANCE	rs998521	15	66407072	MAP2K1	rs235301	21	46297256	PCNT	dominant	0.196448	0.251942	2.01386	0.725887	protective	NA
KEGG_NEUROTROPHIN_SIGNALING_PATHWAY	REACTOME_ORGANELLE_BIOGENESIS_AND_MAINTENANCE	rs2803965	14	73098014	PSEN1	rs16996724	22	36772774	IFT27	dominant	0.0521643	0.0865705	2.01318	0.580691	protective	NA
KEGG_NEUROTROPHIN_SIGNALING_PATHWAY	REACTOME_ORGANELLE_BIOGENESIS_AND_MAINTENANCE	rs62315570	4	86331750	MAPK10	rs4655200	1	20672101	KIF17	dominant	0.265261	0.320755	2.01121	0.764528	protective	NA
KEGG_NEUROTROPHIN_SIGNALING_PATHWAY	REACTOME_ORGANELLE_BIOGENESIS_AND_MAINTENANCE	rs28574697	19	48959488	BAX	rs201143490	9	136452021	INPP5E	dominant	0.0943396	0.134295	2.00784	0.671488	protective	NA
KEGG_NEUROTROPHIN_SIGNALING_PATHWAY	REACTOME_ORGANELLE_BIOGENESIS_AND_MAINTENANCE	rs3844536	19	396948	SHC2	rs7247709	19	52240015	PPP2R1A	dominant	0.412875	0.471698	2.00523	0.787599	protective	0.008
KEGG_NEUROTROPHIN_SIGNALING_PATHWAY	REACTOME_ORGANELLE_BIOGENESIS_AND_MAINTENANCE	rs8142362	22	20979079	CRKL	rs139876794	2	231758505	PDE6D	dominant	0.0577137	0.0899001	2.00415	0.620047	protective	NA
KEGG_NEUROTROPHIN_SIGNALING_PATHWAY	REACTOME_ORGANELLE_BIOGENESIS_AND_MAINTENANCE	rs2224949	14	50096560	SOS2	rs1365962	2	218857832	PRKAG3	recessive_dominant	0.0843507	0.120977	2.0038	0.669358	protective	NA
KEGG_NEUROTROPHIN_SIGNALING_PATHWAY	REACTOME_ORGANELLE_BIOGENESIS_AND_MAINTENANCE	rs2239798	6	36177857	MAPK13	rs57156634	11	103446048	DYNC2H1	dominant	0.0410655	0.0688124	2.00184	0.579506	protective	NA
KEGG_NEUROTROPHIN_SIGNALING_PATHWAY	REACTOME_ORGANELLE_BIOGENESIS_AND_MAINTENANCE	rs13322072	3	179282730	PIK3CA	rs71626264	3	177098521	TBL1XR1	dominant	0.354051	0.412875	2.00058	0.779436	protective	2.690e-04
KEGG_NEUROTROPHIN_SIGNALING_PATHWAY	REACTOME_ORGANELLE_BIOGENESIS_AND_MAINTENANCE	rs9759629	4	113743604	CAMK2D	rs7247709	19	52240015	PPP2R1A	dominant	0.348502	0.406215	2.00013	0.781923	protective	NA
KEGG_NEUROTROPHIN_SIGNALING_PATHWAY	REACTOME_ORGANELLE_BIOGENESIS_AND_MAINTENANCE	rs2803965	14	73098014	PSEN1	rs11168720	12	49146750	TUBA1A/TUBA1B	recessive_dominant	0.0499445	0.0799112	1.99975	0.605286	protective	NA
KEGG_NEUROTROPHIN_SIGNALING_PATHWAY	REACTOME_ORGANELLE_BIOGENESIS_AND_MAINTENANCE	rs1902716	10	48395086	MAPK8	rs4726122	7	151675463	PRKAG2	dominant	0.248613	0.300777	1.9992	0.769185	protective	NA
KEGG_NEUROTROPHIN_SIGNALING_PATHWAY	REACTOME_ORGANELLE_BIOGENESIS_AND_MAINTENANCE	rs55702801	14	73255495	PSEN1	rs6751305	2	61876220	CCT4	dominant	0.164262	0.210877	1.99677	0.7355	protective	NA
KEGG_NEUROTROPHIN_SIGNALING_PATHWAY	REACTOME_ORGANELLE_BIOGENESIS_AND_MAINTENANCE	rs72765496	5	56945800	MAP3K1	rs57156634	11	103446048	DYNC2H1	dominant	0.00554939	0.0199778	1.99369	0.273748	protective	NA
KEGG_NEUROTROPHIN_SIGNALING_PATHWAY	REACTOME_ORGANELLE_BIOGENESIS_AND_MAINTENANCE	rs201635960	5	180199887	MAPK9	rs7129263	11	248077	SIRT3	recessive	0	0.00887902	1.99332	0	protective	NA
KEGG_NEUROTROPHIN_SIGNALING_PATHWAY	REACTOME_ORGANELLE_BIOGENESIS_AND_MAINTENANCE	rs557328	19	7902965	MAP2K7	rs71421442	14	57152633	EXOC5	dominant	0.224195	0.277469	1.99308	0.752515	protective	NA
KEGG_NEUROTROPHIN_SIGNALING_PATHWAY	REACTOME_ORGANELLE_BIOGENESIS_AND_MAINTENANCE	rs3844536	19	396948	SHC2	rs10402773	19	33004535	CEP89	dominant	0.408435	0.467259	1.99148	0.78719	protective	0.003
KEGG_NEUROTROPHIN_SIGNALING_PATHWAY	REACTOME_ORGANELLE_BIOGENESIS_AND_MAINTENANCE	rs529025836	17	63636272	MAP3K3	rs553512184	1	153989995	CRTC2	recessive_dominant	0.152053	0.196448	1.98965	0.733487	protective	NA
KEGG_NEUROTROPHIN_SIGNALING_PATHWAY	REACTOME_ORGANELLE_BIOGENESIS_AND_MAINTENANCE	rs139443871	19	4165336	MAP2K2	rs2311600	2	121340676	CLASP1	recessive	0.0233074	0.0477248	1.98882	0.476163	protective	NA
KEGG_NEUROTROPHIN_SIGNALING_PATHWAY	REACTOME_ORGANELLE_BIOGENESIS_AND_MAINTENANCE	rs7076160	10	48473929	MAPK8	rs2489138	1	156526564	MEF2D	dominant	0.239734	0.295228	1.98851	0.752758	protective	NA
KEGG_NEUROTROPHIN_SIGNALING_PATHWAY	REACTOME_ORGANELLE_BIOGENESIS_AND_MAINTENANCE	rs2908290	7	44216137	CAMK2B	rs10077397	5	88903298	MEF2C	recessive_dominant	0.0743618	0.108768	1.98701	0.658261	protective	NA
KEGG_NEUROTROPHIN_SIGNALING_PATHWAY	REACTOME_ORGANELLE_BIOGENESIS_AND_MAINTENANCE	rs4877972	9	88989455	SHC3	rs62151837	2	73390396	ALMS1	dominant	0.346282	0.401776	1.98414	0.788714	protective	NA
KEGG_NEUROTROPHIN_SIGNALING_PATHWAY	REACTOME_ORGANELLE_BIOGENESIS_AND_MAINTENANCE	rs201635960	5	180199887	MAPK9	rs4917904	10	102447292	ACTR1A	recessive_dominant	0.0266371	0.0510544	1.98395	0.508651	protective	NA
KEGG_NEUROTROPHIN_SIGNALING_PATHWAY	REACTOME_ORGANELLE_BIOGENESIS_AND_MAINTENANCE	rs2803965	14	73098014	PSEN1	rs4679312	3	126676788	CHCHD6	recessive	0.0233074	0.045505	1.98295	0.500554	protective	NA
KEGG_NEUROTROPHIN_SIGNALING_PATHWAY	REACTOME_ORGANELLE_BIOGENESIS_AND_MAINTENANCE	rs2803965	14	73098014	PSEN1	rs6961764	7	133131298	CHCHD3	dominant	0.345172	0.401776	1.98143	0.784853	protective	NA
KEGG_NEUROTROPHIN_SIGNALING_PATHWAY	REACTOME_ORGANELLE_BIOGENESIS_AND_MAINTENANCE	rs139443871	19	4165336	MAP2K2	rs7804751	7	151645370	PRKAG2	recessive_dominant	0.115427	0.156493	1.9803	0.703347	protective	NA
KEGG_NEUROTROPHIN_SIGNALING_PATHWAY	REACTOME_ORGANELLE_BIOGENESIS_AND_MAINTENANCE	rs4877972	9	88989455	SHC3	rs73054883	19	52207932	PPP2R1A	recessive_dominant	0.00110988	0.0133185	1.9783	0.0823148	protective	NA
KEGG_NEUROTROPHIN_SIGNALING_PATHWAY	REACTOME_ORGANELLE_BIOGENESIS_AND_MAINTENANCE	rs13322072	3	179282730	PIK3CA	rs528424379	16	23661801	PLK1	recessive_dominant	0.0288568	0.0532741	1.97769	0.528048	protective	NA
KEGG_NEUROTROPHIN_SIGNALING_PATHWAY	REACTOME_ORGANELLE_BIOGENESIS_AND_MAINTENANCE	rs7033070	9	131586374	RAPGEF1	rs37815	16	3455912	CLUAP1	recessive_dominant	0.0122087	0.0299667	1.97751	0.400083	protective	NA
KEGG_NEUROTROPHIN_SIGNALING_PATHWAY	REACTOME_ORGANELLE_BIOGENESIS_AND_MAINTENANCE	rs325923	1	111691513	RAP1A	rs4821542	22	37252918	SSTR3	recessive	0.00554939	0.0199778	1.97468	0.273748	protective	NA
KEGG_NEUROTROPHIN_SIGNALING_PATHWAY	REACTOME_ORGANELLE_BIOGENESIS_AND_MAINTENANCE	rs2803965	14	73098014	PSEN1	rs7247709	19	52240015	PPP2R1A	dominant	0.321865	0.378468	1.97418	0.779454	protective	NA
KEGG_NEUROTROPHIN_SIGNALING_PATHWAY	REACTOME_ORGANELLE_BIOGENESIS_AND_MAINTENANCE	rs3861824	1	58807217	JUN	rs2311600	2	121340676	CLASP1	dominant	0.0943396	0.137625	1.97318	0.652722	protective	NA
KEGG_NEUROTROPHIN_SIGNALING_PATHWAY	REACTOME_ORGANELLE_BIOGENESIS_AND_MAINTENANCE	rs529025836	17	63636272	MAP3K3	rs896806	2	19961843	WDR35	recessive_dominant	0.143174	0.188679	1.96814	0.718523	protective	NA
KEGG_NEUROTROPHIN_SIGNALING_PATHWAY	REACTOME_ORGANELLE_BIOGENESIS_AND_MAINTENANCE	rs9347129	6	166895934	RPS6KA2	rs7798741	7	33585000	BBS9	recessive	0.00332963	0.0166482	1.96754	0.197327	protective	NA
KEGG_NEUROTROPHIN_SIGNALING_PATHWAY	REACTOME_ORGANELLE_BIOGENESIS_AND_MAINTENANCE	rs998521	15	66407072	MAP2K1	rs4679312	3	126676788	CHCHD6	dominant	0.220866	0.277469	1.96625	0.738171	protective	NA
KEGG_NEUROTROPHIN_SIGNALING_PATHWAY	REACTOME_ORGANELLE_BIOGENESIS_AND_MAINTENANCE	rs1902716	10	48395086	MAPK8	rs7247709	19	52240015	PPP2R1A	dominant	0.265261	0.319645	1.96557	0.768436	protective	NA
KEGG_NEUROTROPHIN_SIGNALING_PATHWAY	REACTOME_ORGANELLE_BIOGENESIS_AND_MAINTENANCE	rs7222654	17	8932404	PIK3R5	rs1396893	8	55779322	TGS1	recessive_dominant	0.0166482	0.036626	1.96387	0.445311	protective	NA
KEGG_NEUROTROPHIN_SIGNALING_PATHWAY	REACTOME_ORGANELLE_BIOGENESIS_AND_MAINTENANCE	rs998521	15	66407072	MAP2K1	rs60599587	16	2054872	PKD1	dominant	0.204218	0.259711	1.96232	0.73149	protective	NA
KEGG_NEUROTROPHIN_SIGNALING_PATHWAY	REACTOME_ORGANELLE_BIOGENESIS_AND_MAINTENANCE	rs55967668	5	68241438	PIK3R1	rs71421442	14	57152633	EXOC5	dominant	0.124306	0.165372	1.96003	0.716428	protective	NA
KEGG_NEUROTROPHIN_SIGNALING_PATHWAY	REACTOME_ORGANELLE_BIOGENESIS_AND_MAINTENANCE	rs8073151	17	1495834	CRK	rs9294982	6	169696898	TCTE3	recessive	0.0388457	0.0665927	1.95641	0.566493	protective	NA
KEGG_NEUROTROPHIN_SIGNALING_PATHWAY	REACTOME_ORGANELLE_BIOGENESIS_AND_MAINTENANCE	rs6094276	20	44949946	YWHAB	rs37815	16	3455912	CLUAP1	recessive	0	0.00887902	1.95533	0	protective	NA
KEGG_NEUROTROPHIN_SIGNALING_PATHWAY	REACTOME_ORGANELLE_BIOGENESIS_AND_MAINTENANCE	rs11102837	1	115346655	NGF	rs10460000	18	12320551	TUBB6	recessive_dominant	0.0699223	0.104329	1.9541	0.64542	protective	NA
KEGG_NEUROTROPHIN_SIGNALING_PATHWAY	REACTOME_ORGANELLE_BIOGENESIS_AND_MAINTENANCE	rs529025836	17	63636272	MAP3K3	rs62151837	2	73390396	ALMS1	recessive_dominant	0.117647	0.158713	1.95345	0.70676	protective	NA
KEGG_NEUROTROPHIN_SIGNALING_PATHWAY	REACTOME_ORGANELLE_BIOGENESIS_AND_MAINTENANCE	rs529025836	17	63636272	MAP3K3	rs235301	21	46297256	PCNT	recessive_dominant	0.132075	0.17869	1.95285	0.699433	protective	NA
KEGG_NEUROTROPHIN_SIGNALING_PATHWAY	REACTOME_ORGANELLE_BIOGENESIS_AND_MAINTENANCE	rs201635960	5	180199887	MAPK9	rs200502024	3	121820354	IQCB1	recessive_dominant	0.0122087	0.0310766	1.94878	0.385353	protective	NA
KEGG_NEUROTROPHIN_SIGNALING_PATHWAY	REACTOME_ORGANELLE_BIOGENESIS_AND_MAINTENANCE	rs2087072	1	243829549	AKT3	rs2847251	18	12751036	CEP76	recessive_dominant	0.0288568	0.054384	1.94795	0.516665	protective	NA
KEGG_NEUROTROPHIN_SIGNALING_PATHWAY	REACTOME_ORGANELLE_BIOGENESIS_AND_MAINTENANCE	rs9347129	6	166895934	RPS6KA2	rs376270	16	57950057	CNGB1	recessive_dominant	0.0122087	0.0299667	1.9473	0.400083	protective	NA
KEGG_NEUROTROPHIN_SIGNALING_PATHWAY	REACTOME_ORGANELLE_BIOGENESIS_AND_MAINTENANCE	rs529025836	17	63636272	MAP3K3	rs4655200	1	20672101	KIF17	recessive_dominant	0.0976693	0.136515	1.94699	0.684647	protective	NA
KEGG_NEUROTROPHIN_SIGNALING_PATHWAY	REACTOME_ORGANELLE_BIOGENESIS_AND_MAINTENANCE	rs2169633	15	66467291	MAP2K1	rs57156634	11	103446048	DYNC2H1	recessive_dominant	0.0221976	0.0443951	1.94494	0.488649	protective	NA
KEGG_NEUROTROPHIN_SIGNALING_PATHWAY	REACTOME_ORGANELLE_BIOGENESIS_AND_MAINTENANCE	rs545970	6	44239677	NFKBIE	rs4917904	10	102447292	ACTR1A	recessive_dominant	0.0255272	0.0488346	1.94417	0.510225	protective	NA
KEGG_NEUROTROPHIN_SIGNALING_PATHWAY	REACTOME_ORGANELLE_BIOGENESIS_AND_MAINTENANCE	rs9759629	4	113743604	CAMK2D	rs200502024	3	121820354	IQCB1	recessive_dominant	0.0133185	0.0332963	1.94287	0.391901	protective	NA
KEGG_NEUROTROPHIN_SIGNALING_PATHWAY	REACTOME_ORGANELLE_BIOGENESIS_AND_MAINTENANCE	rs200089036	19	38902723	NFKBIB	rs6961764	7	133131298	CHCHD3	recessive_dominant	0.124306	0.165372	1.94267	0.716428	protective	NA
KEGG_NEUROTROPHIN_SIGNALING_PATHWAY	REACTOME_ORGANELLE_BIOGENESIS_AND_MAINTENANCE	rs9759629	4	113743604	CAMK2D	rs6432044	2	10041284	CYS1	recessive_dominant	0.0976693	0.138735	1.94173	0.671961	protective	NA
KEGG_NEUROTROPHIN_SIGNALING_PATHWAY	REACTOME_ORGANELLE_BIOGENESIS_AND_MAINTENANCE	rs4791329	17	7693455	TP53	rs6751305	2	61876220	CCT4	recessive_dominant	0.103219	0.142064	1.94049	0.69509	protective	NA
KEGG_NEUROTROPHIN_SIGNALING_PATHWAY	REACTOME_ORGANELLE_BIOGENESIS_AND_MAINTENANCE	rs55702801	14	73255495	PSEN1	rs4726122	7	151675463	PRKAG2	dominant	0.158713	0.204218	1.93831	0.735137	protective	NA
KEGG_NEUROTROPHIN_SIGNALING_PATHWAY	REACTOME_ORGANELLE_BIOGENESIS_AND_MAINTENANCE	rs529025836	17	63636272	MAP3K3	rs10077397	5	88903298	MEF2C	recessive	0.00887902	0.0277469	1.93678	0.313908	protective	NA
KEGG_NEUROTROPHIN_SIGNALING_PATHWAY	REACTOME_ORGANELLE_BIOGENESIS_AND_MAINTENANCE	rs4307417	9	89218258	SHC3	rs6534321	4	122692023	BBS12	recessive	0.00221976	0.0133185	1.93652	0.164813	protective	NA
KEGG_NEUROTROPHIN_SIGNALING_PATHWAY	REACTOME_ORGANELLE_BIOGENESIS_AND_MAINTENANCE	rs13322072	3	179282730	PIK3CA	rs1396893	8	55779322	TGS1	dominant	0.347392	0.405105	1.93553	0.781698	protective	NA
KEGG_NEUROTROPHIN_SIGNALING_PATHWAY	REACTOME_ORGANELLE_BIOGENESIS_AND_MAINTENANCE	rs11102837	1	115346655	NGF	rs2072826	6	135253558	AHI1	recessive_dominant	0.0388457	0.0654828	1.9322	0.57678	protective	NA
KEGG_NEUROTROPHIN_SIGNALING_PATHWAY	REACTOME_ORGANELLE_BIOGENESIS_AND_MAINTENANCE	rs3861824	1	58807217	JUN	rs7247709	19	52240015	PPP2R1A	recessive_dominant	0.0122087	0.0310766	1.93111	0.385353	protective	NA
KEGG_NEUROTROPHIN_SIGNALING_PATHWAY	REACTOME_ORGANELLE_BIOGENESIS_AND_MAINTENANCE	rs3861824	1	58807217	JUN	rs12935211	16	58015332	CNGB1	dominant	0.0921199	0.128746	1.93014	0.686652	protective	NA
KEGG_NEUROTROPHIN_SIGNALING_PATHWAY	REACTOME_ORGANELLE_BIOGENESIS_AND_MAINTENANCE	rs10806852	6	166864334	RPS6KA2	rs10812525	9	27084462	IFT74	dominant	0.157603	0.206437	1.92877	0.719183	protective	NA
KEGG_NEUROTROPHIN_SIGNALING_PATHWAY	REACTOME_ORGANELLE_BIOGENESIS_AND_MAINTENANCE	rs557328	19	7902965	MAP2K7	rs1821526	12	94388174	CEP83	recessive_dominant	0.0388457	0.0654828	1.9281	0.57678	protective	NA
KEGG_NEUROTROPHIN_SIGNALING_PATHWAY	REACTOME_ORGANELLE_BIOGENESIS_AND_MAINTENANCE	rs4877972	9	88989455	SHC3	rs7247709	19	52240015	PPP2R1A	dominant	0.442841	0.500555	1.92558	0.793058	protective	NA
KEGG_NEUROTROPHIN_SIGNALING_PATHWAY	REACTOME_ORGANELLE_BIOGENESIS_AND_MAINTENANCE	rs6072793	20	41185524	PLCG1	rs6961764	7	133131298	CHCHD3	recessive_dominant	0.110988	0.157603	1.92486	0.6673	protective	NA
KEGG_NEUROTROPHIN_SIGNALING_PATHWAY	REACTOME_ORGANELLE_BIOGENESIS_AND_MAINTENANCE	rs139443871	19	4165336	MAP2K2	rs2655172	8	70154581	NCOA2	recessive_dominant	0.0843507	0.120977	1.92318	0.669358	protective	NA
KEGG_NEUROTROPHIN_SIGNALING_PATHWAY	REACTOME_ORGANELLE_BIOGENESIS_AND_MAINTENANCE	rs3844536	19	396948	SHC2	rs9294982	6	169696898	TCTE3	recessive_dominant	0.108768	0.147614	1.91844	0.704726	protective	NA
KEGG_NEUROTROPHIN_SIGNALING_PATHWAY	REACTOME_ORGANELLE_BIOGENESIS_AND_MAINTENANCE	rs1245510	10	73799959	CAMK2G	rs11707509	3	196346629	TCTEX1D2	recessive_dominant	0.0943396	0.132075	1.91515	0.684524	protective	NA
KEGG_NEUROTROPHIN_SIGNALING_PATHWAY	REACTOME_ORGANELLE_BIOGENESIS_AND_MAINTENANCE	rs2803965	14	73098014	PSEN1	rs235301	21	46297256	PCNT	recessive_dominant	0.0477248	0.0799112	1.91388	0.577036	protective	NA
KEGG_NEUROTROPHIN_SIGNALING_PATHWAY	REACTOME_ORGANELLE_BIOGENESIS_AND_MAINTENANCE	rs4791329	17	7693455	TP53	rs1396893	8	55779322	TGS1	recessive	0.0133185	0.0332963	1.91228	0.391901	protective	NA
KEGG_NEUROTROPHIN_SIGNALING_PATHWAY	REACTOME_ORGANELLE_BIOGENESIS_AND_MAINTENANCE	rs557328	19	7902965	MAP2K7	rs6593798	1	147135704	PRKAB2	dominant	0.187569	0.237514	1.91225	0.741171	protective	NA
KEGG_NEUROTROPHIN_SIGNALING_PATHWAY	REACTOME_ORGANELLE_BIOGENESIS_AND_MAINTENANCE	rs4820983	22	31929654	YWHAH	rs37815	16	3455912	CLUAP1	recessive_dominant	0.0532741	0.0843507	1.91199	0.610847	protective	NA
KEGG_NEUROTROPHIN_SIGNALING_PATHWAY	REACTOME_ORGANELLE_BIOGENESIS_AND_MAINTENANCE	rs11102837	1	115346655	NGF	rs71626264	3	177098521	TBL1XR1	recessive	0.0266371	0.0499445	1.91159	0.520563	protective	NA
KEGG_NEUROTROPHIN_SIGNALING_PATHWAY	REACTOME_ORGANELLE_BIOGENESIS_AND_MAINTENANCE	rs9759629	4	113743604	CAMK2D	rs4959880	6	442206	EXOC2	dominant	0.278579	0.331853	1.91026	0.777474	protective	NA
KEGG_NEUROTROPHIN_SIGNALING_PATHWAY	REACTOME_ORGANELLE_BIOGENESIS_AND_MAINTENANCE	rs55702801	14	73255495	PSEN1	rs11985061	8	130359659	ASAP1	dominant	0.1798	0.231964	1.91015	0.725822	protective	NA
KEGG_NEUROTROPHIN_SIGNALING_PATHWAY	REACTOME_ORGANELLE_BIOGENESIS_AND_MAINTENANCE	rs17051913	9	89061524	SHC3	rs10402773	19	33004535	CEP89	dominant	0.254162	0.307436	1.90973	0.767664	protective	NA
KEGG_NEUROTROPHIN_SIGNALING_PATHWAY	REACTOME_ORGANELLE_BIOGENESIS_AND_MAINTENANCE	rs12337518	9	84884971	NTRK2	rs12933372	16	80566189	DYNLRB2	recessive_dominant	0.00332963	0.0155383	1.90919	0.211661	protective	NA
KEGG_NEUROTROPHIN_SIGNALING_PATHWAY	REACTOME_ORGANELLE_BIOGENESIS_AND_MAINTENANCE	rs557328	19	7902965	MAP2K7	rs34487560	4	56029268	CEP135	dominant	0.304107	0.3596	1.90793	0.77824	protective	NA
KEGG_NEUROTROPHIN_SIGNALING_PATHWAY	REACTOME_ORGANELLE_BIOGENESIS_AND_MAINTENANCE	rs139443871	19	4165336	MAP2K2	rs11180783	12	76383340	BBS10	recessive_dominant	0.0854606	0.123196	1.90749	0.66507	protective	NA
KEGG_NEUROTROPHIN_SIGNALING_PATHWAY	REACTOME_ORGANELLE_BIOGENESIS_AND_MAINTENANCE	rs531967415	1	114764150	NRAS	rs71421442	14	57152633	EXOC5	recessive_dominant	0.045505	0.0776915	1.90727	0.565963	protective	NA
KEGG_NEUROTROPHIN_SIGNALING_PATHWAY	REACTOME_ORGANELLE_BIOGENESIS_AND_MAINTENANCE	rs8073151	17	1495834	CRK	rs34144731	4	55921913	CEP135/EXOC1	recessive_dominant	0.00776915	0.0233074	1.90622	0.328113	protective	NA
KEGG_NEUROTROPHIN_SIGNALING_PATHWAY	REACTOME_ORGANELLE_BIOGENESIS_AND_MAINTENANCE	rs1902716	10	48395086	MAPK8	rs536327334	13	20581760	IFT88	dominant	0.299667	0.357381	1.90569	0.769409	protective	NA
KEGG_NEUROTROPHIN_SIGNALING_PATHWAY	REACTOME_ORGANELLE_BIOGENESIS_AND_MAINTENANCE	rs36133170	6	166600960	RPS6KA2	rs9409189	9	120382927	CDK5RAP2	recessive_dominant	0	0.00887902	1.90471	0	protective	NA
KEGG_NEUROTROPHIN_SIGNALING_PATHWAY	REACTOME_ORGANELLE_BIOGENESIS_AND_MAINTENANCE	rs147511193	3	119945039	GSK3B	rs1975944	12	69808396	RAB3IP	recessive_dominant	0.00332963	0.017758	1.90224	0.184786	protective	NA
KEGG_NEUROTROPHIN_SIGNALING_PATHWAY	REACTOME_ORGANELLE_BIOGENESIS_AND_MAINTENANCE	rs7222654	17	8932404	PIK3R5	rs1361784	6	84090690	CEP162	recessive_dominant	0.0155383	0.036626	1.90185	0.415155	protective	NA
KEGG_NEUROTROPHIN_SIGNALING_PATHWAY	REACTOME_ORGANELLE_BIOGENESIS_AND_MAINTENANCE	rs1245510	10	73799959	CAMK2G	rs6534321	4	122692023	BBS12	recessive_dominant	0.0166482	0.0288568	1.90182	0.56976	protective	NA
KEGG_NEUROTROPHIN_SIGNALING_PATHWAY	REACTOME_ORGANELLE_BIOGENESIS_AND_MAINTENANCE	rs4877972	9	88989455	SHC3	rs1365962	2	218857832	PRKAG3	recessive_dominant	0.103219	0.142064	1.90027	0.69509	protective	NA
KEGG_NEUROTROPHIN_SIGNALING_PATHWAY	REACTOME_ORGANELLE_BIOGENESIS_AND_MAINTENANCE	rs12950747	17	8996860	PIK3R5	rs201714196	11	95748746	CEP57	recessive_dominant	0.00221976	0.0133185	1.89934	0.164813	protective	NA
KEGG_NEUROTROPHIN_SIGNALING_PATHWAY	REACTOME_ORGANELLE_BIOGENESIS_AND_MAINTENANCE	rs139443871	19	4165336	MAP2K2	rs4655200	1	20672101	KIF17	recessive_dominant	0.0488346	0.0776915	1.89913	0.609502	protective	NA
KEGG_NEUROTROPHIN_SIGNALING_PATHWAY	REACTOME_ORGANELLE_BIOGENESIS_AND_MAINTENANCE	rs12337518	9	84884971	NTRK2	rs71626264	3	177098521	TBL1XR1	recessive_dominant	0.0166482	0.036626	1.89869	0.445311	protective	NA
KEGG_NEUROTROPHIN_SIGNALING_PATHWAY	REACTOME_ORGANELLE_BIOGENESIS_AND_MAINTENANCE	rs7805383	7	140908104	BRAF	rs7943261	11	95767956	CEP57	recessive_dominant	0.0588235	0.0921199	1.89723	0.615964	protective	NA
KEGG_NEUROTROPHIN_SIGNALING_PATHWAY	REACTOME_ORGANELLE_BIOGENESIS_AND_MAINTENANCE	rs7076160	10	48473929	MAPK8	rs2655172	8	70154581	NCOA2	dominant	0.241953	0.291898	1.89677	0.774285	protective	NA
KEGG_NEUROTROPHIN_SIGNALING_PATHWAY	REACTOME_ORGANELLE_BIOGENESIS_AND_MAINTENANCE	rs998521	15	66407072	MAP2K1	rs56071638	16	53234175	CHD9	dominant	0.233074	0.289678	1.89557	0.745214	protective	NA
KEGG_NEUROTROPHIN_SIGNALING_PATHWAY	REACTOME_ORGANELLE_BIOGENESIS_AND_MAINTENANCE	rs2803965	14	73098014	PSEN1	rs12935211	16	58015332	CNGB1	dominant	0.318535	0.374029	1.89502	0.782281	protective	NA
KEGG_NEUROTROPHIN_SIGNALING_PATHWAY	REACTOME_ORGANELLE_BIOGENESIS_AND_MAINTENANCE	rs2803965	14	73098014	PSEN1	rs528424379	16	23661801	PLK1	recessive_dominant	0.0166482	0.036626	1.8946	0.445311	protective	NA
KEGG_NEUROTROPHIN_SIGNALING_PATHWAY	REACTOME_ORGANELLE_BIOGENESIS_AND_MAINTENANCE	rs7033070	9	131586374	RAPGEF1	rs11432188	9	34575985	DCTN3	dominant	0.150943	0.197558	1.88861	0.722097	protective	1.568e-04
KEGG_NEUROTROPHIN_SIGNALING_PATHWAY	REACTOME_ORGANELLE_BIOGENESIS_AND_MAINTENANCE	rs2075076	7	44274642	CAMK2B	rs10077397	5	88903298	MEF2C	recessive_dominant	0.0288568	0.0521643	1.88859	0.539915	protective	NA
KEGG_NEUROTROPHIN_SIGNALING_PATHWAY	REACTOME_ORGANELLE_BIOGENESIS_AND_MAINTENANCE	rs529025836	17	63636272	MAP3K3	rs3806410	1	156337134	CCT3	recessive	0.0166482	0.0388457	1.88624	0.418897	protective	NA
KEGG_NEUROTROPHIN_SIGNALING_PATHWAY	REACTOME_ORGANELLE_BIOGENESIS_AND_MAINTENANCE	rs4820983	22	31929654	YWHAH	rs6432044	2	10041284	CYS1	recessive_dominant	0.0987791	0.139845	1.88389	0.674163	protective	NA
KEGG_NEUROTROPHIN_SIGNALING_PATHWAY	REACTOME_ORGANELLE_BIOGENESIS_AND_MAINTENANCE	rs2803965	14	73098014	PSEN1	rs2671332	11	103231440	DYNC2H1	recessive_dominant	0.0432852	0.0732519	1.88303	0.5724	protective	NA
KEGG_NEUROTROPHIN_SIGNALING_PATHWAY	REACTOME_ORGANELLE_BIOGENESIS_AND_MAINTENANCE	rs62315570	4	86331750	MAPK10	rs71421442	14	57152633	EXOC5	recessive_dominant	0.0421754	0.0699223	1.88214	0.585701	protective	NA
KEGG_NEUROTROPHIN_SIGNALING_PATHWAY	REACTOME_ORGANELLE_BIOGENESIS_AND_MAINTENANCE	rs7076160	10	48473929	MAPK8	rs10402773	19	33004535	CEP89	dominant	0.263041	0.316315	1.88204	0.771465	protective	NA
KEGG_NEUROTROPHIN_SIGNALING_PATHWAY	REACTOME_ORGANELLE_BIOGENESIS_AND_MAINTENANCE	rs200089036	19	38902723	NFKBIB	rs6432044	2	10041284	CYS1	recessive_dominant	0.102109	0.143174	1.88176	0.680561	protective	NA
KEGG_NEUROTROPHIN_SIGNALING_PATHWAY	REACTOME_ORGANELLE_BIOGENESIS_AND_MAINTENANCE	rs9347129	6	166895934	RPS6KA2	rs2018797	7	129210004	SMO	recessive_dominant	0.0155383	0.0344062	1.88009	0.442957	protective	NA
KEGG_NEUROTROPHIN_SIGNALING_PATHWAY	REACTOME_ORGANELLE_BIOGENESIS_AND_MAINTENANCE	rs557328	19	7902965	MAP2K7	rs771795	3	101718657	CEP97	dominant	0.318535	0.374029	1.87943	0.782281	protective	NA
KEGG_NEUROTROPHIN_SIGNALING_PATHWAY	REACTOME_ORGANELLE_BIOGENESIS_AND_MAINTENANCE	rs1007802	1	206735691	MAPKAPK2	rs11707509	3	196346629	TCTEX1D2	recessive_dominant	0.0876804	0.123196	1.87817	0.684005	protective	NA
KEGG_NEUROTROPHIN_SIGNALING_PATHWAY	REACTOME_ORGANELLE_BIOGENESIS_AND_MAINTENANCE	rs1245510	10	73799959	CAMK2G	rs10779788	1	5945990	NPHP4	dominant	0.374029	0.428413	1.87659	0.797206	protective	NA
KEGG_NEUROTROPHIN_SIGNALING_PATHWAY	REACTOME_ORGANELLE_BIOGENESIS_AND_MAINTENANCE	rs11063604	12	5408423	NTF3	rs34144731	4	55921913	CEP135/EXOC1	recessive_dominant	0.00221976	0.0144284	1.87653	0.151964	protective	NA
KEGG_NEUROTROPHIN_SIGNALING_PATHWAY	REACTOME_ORGANELLE_BIOGENESIS_AND_MAINTENANCE	rs2612043	12	66183500	IRAK3	rs34144731	4	55921913	CEP135/EXOC1	recessive_dominant	0.00221976	0.0144284	1.87653	0.151964	protective	NA
KEGG_NEUROTROPHIN_SIGNALING_PATHWAY	REACTOME_ORGANELLE_BIOGENESIS_AND_MAINTENANCE	rs998521	15	66407072	MAP2K1	rs57574050	17	76091089	EXOC7	dominant	0.0799112	0.122087	1.87643	0.624542	protective	NA
KEGG_NEUROTROPHIN_SIGNALING_PATHWAY	REACTOME_ORGANELLE_BIOGENESIS_AND_MAINTENANCE	rs998521	15	66407072	MAP2K1	rs28396987	22	36823436	IFT27	dominant	0.170921	0.223085	1.87548	0.717963	protective	NA
KEGG_NEUROTROPHIN_SIGNALING_PATHWAY	REACTOME_ORGANELLE_BIOGENESIS_AND_MAINTENANCE	rs2803965	14	73098014	PSEN1	rs55924499	7	151517706	PRKAG2	recessive_dominant	0.0466149	0.0743618	1.87535	0.608622	protective	NA
KEGG_NEUROTROPHIN_SIGNALING_PATHWAY	REACTOME_ORGANELLE_BIOGENESIS_AND_MAINTENANCE	rs545970	6	44239677	NFKBIE	rs6593798	1	147135704	PRKAB2	recessive_dominant	0.0122087	0.0299667	1.87326	0.400083	protective	NA
KEGG_NEUROTROPHIN_SIGNALING_PATHWAY	REACTOME_ORGANELLE_BIOGENESIS_AND_MAINTENANCE	rs62315570	4	86331750	MAPK10	rs2790035	9	128439923	ODF2	dominant	0.406215	0.462819	1.87125	0.794029	protective	NA
KEGG_NEUROTROPHIN_SIGNALING_PATHWAY	REACTOME_ORGANELLE_BIOGENESIS_AND_MAINTENANCE	rs12425324	12	111407697	SH2B3	rs11707509	3	196346629	TCTEX1D2	recessive	0.0277469	0.0521643	1.87112	0.518556	protective	NA
KEGG_NEUROTROPHIN_SIGNALING_PATHWAY	REACTOME_ORGANELLE_BIOGENESIS_AND_MAINTENANCE	rs55894401	16	81730962	PLCG2	rs896806	2	19961843	WDR35	recessive_dominant	0.0554939	0.0876804	1.86738	0.611343	protective	NA
KEGG_NEUROTROPHIN_SIGNALING_PATHWAY	REACTOME_ORGANELLE_BIOGENESIS_AND_MAINTENANCE	rs531967415	1	114764150	NRAS	rs16996724	22	36772774	IFT27	dominant	0.0643729	0.099889	1.86734	0.619982	protective	NA
KEGG_NEUROTROPHIN_SIGNALING_PATHWAY	REACTOME_ORGANELLE_BIOGENESIS_AND_MAINTENANCE	rs2169633	15	66467291	MAP2K1	rs4761574	12	94503883	CEP83	recessive_dominant	0.0965594	0.134295	1.86684	0.688976	protective	NA
KEGG_NEUROTROPHIN_SIGNALING_PATHWAY	REACTOME_ORGANELLE_BIOGENESIS_AND_MAINTENANCE	rs2087072	1	243829549	AKT3	rs73054883	19	52207932	PPP2R1A	recessive_dominant	0.00110988	0.0110988	1.86569	0.099	protective	NA
KEGG_NEUROTROPHIN_SIGNALING_PATHWAY	REACTOME_ORGANELLE_BIOGENESIS_AND_MAINTENANCE	rs12425324	12	111407697	SH2B3	rs17166570	5	132660439	KIF3A	dominant	0.063263	0.0976693	1.8656	0.623936	protective	NA
KEGG_NEUROTROPHIN_SIGNALING_PATHWAY	REACTOME_ORGANELLE_BIOGENESIS_AND_MAINTENANCE	rs529025836	17	63636272	MAP3K3	rs6464184	7	151625412	PRKAG2	recessive_dominant	0.105438	0.144284	1.86511	0.699036	protective	NA
KEGG_NEUROTROPHIN_SIGNALING_PATHWAY	REACTOME_ORGANELLE_BIOGENESIS_AND_MAINTENANCE	rs7076160	10	48473929	MAPK8	rs1917460	11	103527656	DYNC2H1	dominant	0.205327	0.254162	1.8643	0.758215	protective	NA
KEGG_NEUROTROPHIN_SIGNALING_PATHWAY	REACTOME_ORGANELLE_BIOGENESIS_AND_MAINTENANCE	rs9786966	1	3623414	TP73	rs73054883	19	52207932	PPP2R1A	recessive_dominant	0.00221976	0.0133185	1.86386	0.164813	protective	NA
KEGG_NEUROTROPHIN_SIGNALING_PATHWAY	REACTOME_ORGANELLE_BIOGENESIS_AND_MAINTENANCE	rs9347129	6	166895934	RPS6KA2	rs7833836	8	17935642	PCM1	recessive_dominant	0.0155383	0.0344062	1.86256	0.442957	protective	NA
KEGG_NEUROTROPHIN_SIGNALING_PATHWAY	REACTOME_ORGANELLE_BIOGENESIS_AND_MAINTENANCE	rs998521	15	66407072	MAP2K1	rs1365962	2	218857832	PRKAG3	recessive_dominant	0.0499445	0.0865705	1.86062	0.554682	protective	NA
KEGG_NEUROTROPHIN_SIGNALING_PATHWAY	REACTOME_ORGANELLE_BIOGENESIS_AND_MAINTENANCE	rs2075076	7	44274642	CAMK2B	rs73094828	20	32316895	KIF3B	dominant	0.0921199	0.127636	1.86019	0.693505	protective	NA
KEGG_NEUROTROPHIN_SIGNALING_PATHWAY	REACTOME_ORGANELLE_BIOGENESIS_AND_MAINTENANCE	rs62315570	4	86331750	MAPK10	rs7783031	7	151590143	PRKAG2	recessive	0.00332963	0.0155383	1.86014	0.211661	protective	NA
KEGG_NEUROTROPHIN_SIGNALING_PATHWAY	REACTOME_ORGANELLE_BIOGENESIS_AND_MAINTENANCE	rs13322072	3	179282730	PIK3CA	rs4761574	12	94503883	CEP83	dominant	0.435072	0.492786	1.85871	0.792687	protective	NA
KEGG_NEUROTROPHIN_SIGNALING_PATHWAY	REACTOME_ORGANELLE_BIOGENESIS_AND_MAINTENANCE	rs7805383	7	140908104	BRAF	rs5756349	22	37196680	SSTR3	recessive_dominant	0.137625	0.18313	1.85803	0.71186	protective	NA
KEGG_NEUROTROPHIN_SIGNALING_PATHWAY	REACTOME_ORGANELLE_BIOGENESIS_AND_MAINTENANCE	rs55967668	5	68241438	PIK3R1	rs6855480	4	23747576	PPARGC1A	dominant	0.0665927	0.0987791	1.8569	0.65091	protective	NA
KEGG_NEUROTROPHIN_SIGNALING_PATHWAY	REACTOME_ORGANELLE_BIOGENESIS_AND_MAINTENANCE	rs201635960	5	180199887	MAPK9	rs71626264	3	177098521	TBL1XR1	dominant	0.351831	0.406215	1.85565	0.793449	protective	NA
KEGG_NEUROTROPHIN_SIGNALING_PATHWAY	REACTOME_ORGANELLE_BIOGENESIS_AND_MAINTENANCE	rs7805383	7	140908104	BRAF	rs7247709	19	52240015	PPP2R1A	dominant	0.460599	0.517203	1.85557	0.797104	protective	NA
KEGG_NEUROTROPHIN_SIGNALING_PATHWAY	REACTOME_ORGANELLE_BIOGENESIS_AND_MAINTENANCE	rs13322072	3	179282730	PIK3CA	rs890980	5	477303	EXOC3	recessive	0.036626	0.0643729	1.85289	0.552578	protective	NA
KEGG_NEUROTROPHIN_SIGNALING_PATHWAY	REACTOME_ORGANELLE_BIOGENESIS_AND_MAINTENANCE	rs557328	19	7902965	MAP2K7	rs6751305	2	61876220	CCT4	dominant	0.335183	0.390677	1.85159	0.786339	protective	NA
KEGG_NEUROTROPHIN_SIGNALING_PATHWAY	REACTOME_ORGANELLE_BIOGENESIS_AND_MAINTENANCE	rs56002030	19	49073984	NTF4	rs9294982	6	169696898	TCTE3	dominant	0.45061	0.511654	1.85096	0.782839	protective	NA
KEGG_NEUROTROPHIN_SIGNALING_PATHWAY	REACTOME_ORGANELLE_BIOGENESIS_AND_MAINTENANCE	rs9347129	6	166895934	RPS6KA2	rs200502024	3	121820354	IQCB1	recessive_dominant	0.00443951	0.0188679	1.84629	0.231884	protective	NA
KEGG_NEUROTROPHIN_SIGNALING_PATHWAY	REACTOME_ORGANELLE_BIOGENESIS_AND_MAINTENANCE	rs2075076	7	44274642	CAMK2B	rs4959880	6	442206	EXOC2	dominant	0.225305	0.27525	1.84611	0.765777	protective	NA
KEGG_NEUROTROPHIN_SIGNALING_PATHWAY	REACTOME_ORGANELLE_BIOGENESIS_AND_MAINTENANCE	rs1245510	10	73799959	CAMK2G	rs201143490	9	136452021	INPP5E	recessive_dominant	0.108768	0.147614	1.84556	0.704726	protective	NA
KEGG_NEUROTROPHIN_SIGNALING_PATHWAY	REACTOME_ORGANELLE_BIOGENESIS_AND_MAINTENANCE	rs62315570	4	86331750	MAPK10	rs2847251	18	12751036	CEP76	recessive_dominant	0.0332963	0.0577137	1.84378	0.562351	protective	NA
KEGG_NEUROTROPHIN_SIGNALING_PATHWAY	REACTOME_ORGANELLE_BIOGENESIS_AND_MAINTENANCE	rs3128321	1	1953252	CALML6	rs2655172	8	70154581	NCOA2	recessive_dominant	0.0477248	0.0832408	1.84237	0.55195	protective	NA
KEGG_NEUROTROPHIN_SIGNALING_PATHWAY	REACTOME_ORGANELLE_BIOGENESIS_AND_MAINTENANCE	rs7805383	7	140908104	BRAF	rs2105847	4	2271113	HAUS3	recessive_dominant	0.0932297	0.130966	1.84167	0.68224	protective	NA
KEGG_NEUROTROPHIN_SIGNALING_PATHWAY	REACTOME_ORGANELLE_BIOGENESIS_AND_MAINTENANCE	rs4877972	9	88989455	SHC3	rs71626264	3	177098521	TBL1XR1	dominant	0.374029	0.427303	1.83451	0.800829	protective	NA
KEGG_NEUROTROPHIN_SIGNALING_PATHWAY	REACTOME_ORGANELLE_BIOGENESIS_AND_MAINTENANCE	rs11063604	12	5408423	NTF3	rs11429505	8	70278596	NCOA2	recessive_dominant	0.0266371	0.0488346	1.83434	0.533015	protective	NA
KEGG_NEUROTROPHIN_SIGNALING_PATHWAY	REACTOME_ORGANELLE_BIOGENESIS_AND_MAINTENANCE	rs998521	15	66407072	MAP2K1	rs979802	11	103388805	DYNC2H1	dominant	0.207547	0.261931	1.83357	0.737994	protective	NA
KEGG_NEUROTROPHIN_SIGNALING_PATHWAY	REACTOME_ORGANELLE_BIOGENESIS_AND_MAINTENANCE	rs9347129	6	166895934	RPS6KA2	rs12302358	12	110239437	IFT81	dominant	0.0721421	0.106548	1.8335	0.651976	protective	NA
KEGG_NEUROTROPHIN_SIGNALING_PATHWAY	REACTOME_ORGANELLE_BIOGENESIS_AND_MAINTENANCE	rs12986190	19	40273038	AKT2	rs17017668	1	211694508	NEK2	dominant	0.0554939	0.0854606	1.83265	0.628748	protective	NA
KEGG_NEUROTROPHIN_SIGNALING_PATHWAY	REACTOME_ORGANELLE_BIOGENESIS_AND_MAINTENANCE	rs998521	15	66407072	MAP2K1	rs10779788	1	5945990	NPHP4	dominant	0.176471	0.228635	1.83243	0.722954	protective	NA
KEGG_NEUROTROPHIN_SIGNALING_PATHWAY	REACTOME_ORGANELLE_BIOGENESIS_AND_MAINTENANCE	rs4791329	17	7693455	TP53	rs11168720	12	49146750	TUBA1A/TUBA1B	recessive_dominant	0.0688124	0.100999	1.83221	0.657769	protective	NA
KEGG_NEUROTROPHIN_SIGNALING_PATHWAY	REACTOME_ORGANELLE_BIOGENESIS_AND_MAINTENANCE	rs7076160	10	48473929	MAPK8	rs10460000	18	12320551	TUBB6	recessive_dominant	0.0399556	0.0677026	1.83144	0.573107	protective	NA
KEGG_NEUROTROPHIN_SIGNALING_PATHWAY	REACTOME_ORGANELLE_BIOGENESIS_AND_MAINTENANCE	rs9347129	6	166895934	RPS6KA2	rs74183366	19	35674986	HAUS5	recessive_dominant	0.0155383	0.0344062	1.82941	0.442957	protective	NA
KEGG_NEUROTROPHIN_SIGNALING_PATHWAY	REACTOME_ORGANELLE_BIOGENESIS_AND_MAINTENANCE	rs9759629	4	113743604	CAMK2D	rs4726122	7	151675463	PRKAG2	dominant	0.36182	0.416204	1.82576	0.795251	protective	NA
KEGG_NEUROTROPHIN_SIGNALING_PATHWAY	REACTOME_ORGANELLE_BIOGENESIS_AND_MAINTENANCE	rs8078982	17	49485912	NGFR	rs11287280	3	45836823	LZTFL1	recessive_dominant	0.0099889	0.0266371	1.8223	0.368694	protective	NA
KEGG_NEUROTROPHIN_SIGNALING_PATHWAY	REACTOME_ORGANELLE_BIOGENESIS_AND_MAINTENANCE	rs62315570	4	86331750	MAPK10	rs200502024	3	121820354	IQCB1	recessive_dominant	0.0110988	0.0288568	1.82208	0.377709	protective	NA
KEGG_NEUROTROPHIN_SIGNALING_PATHWAY	REACTOME_ORGANELLE_BIOGENESIS_AND_MAINTENANCE	rs4307417	9	89218258	SHC3	rs34144731	4	55921913	CEP135/EXOC1	recessive_dominant	0.00554939	0.0221976	1.82198	0.245815	protective	NA
KEGG_NEUROTROPHIN_SIGNALING_PATHWAY	REACTOME_ORGANELLE_BIOGENESIS_AND_MAINTENANCE	rs3844536	19	396948	SHC2	rs7804751	7	151645370	PRKAG2	recessive_dominant	0.143174	0.18424	1.81686	0.739864	protective	NA
KEGG_NEUROTROPHIN_SIGNALING_PATHWAY	REACTOME_ORGANELLE_BIOGENESIS_AND_MAINTENANCE	rs12425324	12	111407697	SH2B3	rs34144731	4	55921913	CEP135/EXOC1	recessive_dominant	0.00887902	0.0244173	1.81618	0.357935	protective	NA
KEGG_NEUROTROPHIN_SIGNALING_PATHWAY	REACTOME_ORGANELLE_BIOGENESIS_AND_MAINTENANCE	rs1007802	1	206735691	MAPKAPK2	rs34144731	4	55921913	CEP135/EXOC1	recessive_dominant	0.00887902	0.0244173	1.81618	0.357935	protective	NA
KEGG_NEUROTROPHIN_SIGNALING_PATHWAY	REACTOME_ORGANELLE_BIOGENESIS_AND_MAINTENANCE	rs34137352	1	3694480	TP73	rs1917460	11	103527656	DYNC2H1	dominant	0.102109	0.140954	1.81541	0.693069	protective	NA
KEGG_NEUROTROPHIN_SIGNALING_PATHWAY	REACTOME_ORGANELLE_BIOGENESIS_AND_MAINTENANCE	rs2908290	7	44216137	CAMK2B	rs896806	2	19961843	WDR35	recessive_dominant	0.107658	0.147614	1.81481	0.696667	protective	NA
KEGG_NEUROTROPHIN_SIGNALING_PATHWAY	REACTOME_ORGANELLE_BIOGENESIS_AND_MAINTENANCE	rs2087072	1	243829549	AKT3	rs7438356	4	15624770	CC2D2A	recessive_dominant	0.106548	0.143174	1.8137	0.713679	protective	NA
KEGG_NEUROTROPHIN_SIGNALING_PATHWAY	REACTOME_ORGANELLE_BIOGENESIS_AND_MAINTENANCE	rs1007802	1	206735691	MAPKAPK2	rs2655172	8	70154581	NCOA2	recessive_dominant	0.122087	0.168701	1.81306	0.685259	protective	NA
KEGG_NEUROTROPHIN_SIGNALING_PATHWAY	REACTOME_ORGANELLE_BIOGENESIS_AND_MAINTENANCE	rs998521	15	66407072	MAP2K1	rs771795	3	101718657	CEP97	dominant	0.210877	0.265261	1.81254	0.740191	protective	NA
KEGG_NEUROTROPHIN_SIGNALING_PATHWAY	REACTOME_ORGANELLE_BIOGENESIS_AND_MAINTENANCE	rs56002030	19	49073984	NTF4	rs62151837	2	73390396	ALMS1	dominant	0.390677	0.443951	1.81252	0.80306	protective	NA
KEGG_NEUROTROPHIN_SIGNALING_PATHWAY	REACTOME_ORGANELLE_BIOGENESIS_AND_MAINTENANCE	rs9347129	6	166895934	RPS6KA2	rs37815	16	3455912	CLUAP1	dominant	0.0799112	0.114317	1.81209	0.672889	protective	NA
KEGG_NEUROTROPHIN_SIGNALING_PATHWAY	REACTOME_ORGANELLE_BIOGENESIS_AND_MAINTENANCE	rs2537850	14	90970875	RPS6KA5	rs17017668	1	211694508	NEK2	recessive_dominant	0	0.00776915	1.81126	0	protective	NA
KEGG_NEUROTROPHIN_SIGNALING_PATHWAY	REACTOME_ORGANELLE_BIOGENESIS_AND_MAINTENANCE	rs6916254	6	136738115	MAP3K5	rs73149474	4	55863337	EXOC1	recessive_dominant	0	0.00776915	1.81126	0	protective	NA
KEGG_NEUROTROPHIN_SIGNALING_PATHWAY	REACTOME_ORGANELLE_BIOGENESIS_AND_MAINTENANCE	rs2908290	7	44216137	CAMK2B	rs4959880	6	442206	EXOC2	dominant	0.332963	0.386238	1.80823	0.793218	protective	NA
KEGG_NEUROTROPHIN_SIGNALING_PATHWAY	REACTOME_ORGANELLE_BIOGENESIS_AND_MAINTENANCE	rs8142362	22	20979079	CRKL	rs2130923	4	23781504	PPARGC1A	dominant	0.17869	0.223085	1.80749	0.757698	protective	NA
KEGG_NEUROTROPHIN_SIGNALING_PATHWAY	REACTOME_ORGANELLE_BIOGENESIS_AND_MAINTENANCE	rs10772805	12	14912466	ARHGDIB	rs4917904	10	102447292	ACTR1A	recessive_dominant	0.0377358	0.0677026	1.80707	0.540019	protective	NA
KEGG_NEUROTROPHIN_SIGNALING_PATHWAY	REACTOME_ORGANELLE_BIOGENESIS_AND_MAINTENANCE	rs9347129	6	166895934	RPS6KA2	rs55924499	7	151517706	PRKAG2	recessive_dominant	0.0199778	0.0399556	1.80454	0.489807	protective	NA
KEGG_NEUROTROPHIN_SIGNALING_PATHWAY	REACTOME_ORGANELLE_BIOGENESIS_AND_MAINTENANCE	rs4877972	9	88989455	SHC3	rs11168720	12	49146750	TUBA1A/TUBA1B	recessive_dominant	0.0776915	0.112098	1.80445	0.667215	protective	NA
KEGG_NEUROTROPHIN_SIGNALING_PATHWAY	REACTOME_ORGANELLE_BIOGENESIS_AND_MAINTENANCE	rs13322072	3	179282730	PIK3CA	rs1015410	7	107134828	PRKAR2B	dominant	0.349612	0.408435	1.80188	0.77856	protective	NA
KEGG_NEUROTROPHIN_SIGNALING_PATHWAY	REACTOME_ORGANELLE_BIOGENESIS_AND_MAINTENANCE	rs4877972	9	88989455	SHC3	rs2790035	9	128439923	ODF2	dominant	0.446171	0.499445	1.80035	0.807401	protective	0.004
KEGG_NEUROTROPHIN_SIGNALING_PATHWAY	REACTOME_ORGANELLE_BIOGENESIS_AND_MAINTENANCE	rs2239798	6	36177857	MAPK13	rs113582339	7	151529654	PRKAG2	recessive_dominant	0.00776915	0.0255272	1.79974	0.298901	protective	NA
KEGG_NEUROTROPHIN_SIGNALING_PATHWAY	REACTOME_ORGANELLE_BIOGENESIS_AND_MAINTENANCE	rs139443871	19	4165336	MAP2K2	rs771795	3	101718657	CEP97	recessive_dominant	0.0943396	0.129856	1.79968	0.698006	protective	NA
KEGG_NEUROTROPHIN_SIGNALING_PATHWAY	REACTOME_ORGANELLE_BIOGENESIS_AND_MAINTENANCE	rs68104879	17	8896949	PIK3R5	rs34144731	4	55921913	CEP135/EXOC1	recessive_dominant	0.00887902	0.0244173	1.79951	0.357935	protective	NA
KEGG_NEUROTROPHIN_SIGNALING_PATHWAY	REACTOME_ORGANELLE_BIOGENESIS_AND_MAINTENANCE	rs2087072	1	243829549	AKT3	rs28588283	4	55820993	EXOC1	recessive	0.0266371	0.0499445	1.79891	0.520563	protective	NA
KEGG_NEUROTROPHIN_SIGNALING_PATHWAY	REACTOME_ORGANELLE_BIOGENESIS_AND_MAINTENANCE	rs3844536	19	396948	SHC2	rs71626264	3	177098521	TBL1XR1	dominant	0.350721	0.402886	1.79858	0.800584	protective	NA
KEGG_NEUROTROPHIN_SIGNALING_PATHWAY	REACTOME_ORGANELLE_BIOGENESIS_AND_MAINTENANCE	rs2517	9	130855035	ABL1	rs61591040	16	23680612	PLK1	dominant	0.0332963	0.0577137	1.79821	0.562351	protective	NA
KEGG_NEUROTROPHIN_SIGNALING_PATHWAY	REACTOME_ORGANELLE_BIOGENESIS_AND_MAINTENANCE	rs529025836	17	63636272	MAP3K3	rs2790035	9	128439923	ODF2	recessive_dominant	0.138735	0.1798	1.79591	0.734814	protective	NA
KEGG_NEUROTROPHIN_SIGNALING_PATHWAY	REACTOME_ORGANELLE_BIOGENESIS_AND_MAINTENANCE	rs4144887	6	166747512	RPS6KA2	rs890980	5	477303	EXOC3	recessive_dominant	0.104329	0.142064	1.79555	0.703435	protective	NA
KEGG_NEUROTROPHIN_SIGNALING_PATHWAY	REACTOME_ORGANELLE_BIOGENESIS_AND_MAINTENANCE	rs112786844	11	565302	HRAS	rs2072826	6	135253558	AHI1	recessive_dominant	0.00443951	0.017758	1.79475	0.246656	protective	NA
KEGG_NEUROTROPHIN_SIGNALING_PATHWAY	REACTOME_ORGANELLE_BIOGENESIS_AND_MAINTENANCE	rs55967668	5	68241438	PIK3R1	rs1917460	11	103527656	DYNC2H1	dominant	0.154273	0.197558	1.79472	0.740932	protective	NA
KEGG_NEUROTROPHIN_SIGNALING_PATHWAY	REACTOME_ORGANELLE_BIOGENESIS_AND_MAINTENANCE	rs62315570	4	86331750	MAPK10	rs34782630	7	129593069	NRF1	dominant	0.164262	0.207547	1.79423	0.750453	protective	NA
KEGG_NEUROTROPHIN_SIGNALING_PATHWAY	REACTOME_ORGANELLE_BIOGENESIS_AND_MAINTENANCE	rs2859240	1	172624233	FASLG	rs6432044	2	10041284	CYS1	recessive_dominant	0.105438	0.148724	1.79415	0.674651	protective	NA
KEGG_NEUROTROPHIN_SIGNALING_PATHWAY	REACTOME_ORGANELLE_BIOGENESIS_AND_MAINTENANCE	rs6916254	6	136738115	MAP3K5	rs2655172	8	70154581	NCOA2	recessive_dominant	0.0310766	0.0621532	1.79333	0.483963	protective	NA
KEGG_NEUROTROPHIN_SIGNALING_PATHWAY	REACTOME_ORGANELLE_BIOGENESIS_AND_MAINTENANCE	rs201635960	5	180199887	MAPK9	rs3828282	2	218779144	PRKAG3	recessive	0.0122087	0.0288568	1.78979	0.415946	protective	NA
KEGG_NEUROTROPHIN_SIGNALING_PATHWAY	REACTOME_ORGANELLE_BIOGENESIS_AND_MAINTENANCE	rs12986190	19	40273038	AKT2	rs62151837	2	73390396	ALMS1	dominant	0.220866	0.267481	1.78348	0.776324	protective	NA
KEGG_NEUROTROPHIN_SIGNALING_PATHWAY	REACTOME_ORGANELLE_BIOGENESIS_AND_MAINTENANCE	rs557328	19	7902965	MAP2K7	rs11168720	12	49146750	TUBA1A/TUBA1B	recessive_dominant	0.0643729	0.0943396	1.78282	0.660498	protective	NA
KEGG_NEUROTROPHIN_SIGNALING_PATHWAY	REACTOME_ORGANELLE_BIOGENESIS_AND_MAINTENANCE	rs2517	9	130855035	ABL1	rs7943261	11	95767956	CEP57	dominant	0.0876804	0.123196	1.77979	0.684005	protective	NA
KEGG_NEUROTROPHIN_SIGNALING_PATHWAY	REACTOME_ORGANELLE_BIOGENESIS_AND_MAINTENANCE	rs2169633	15	66467291	MAP2K1	rs28396987	22	36823436	IFT27	recessive	0.0155383	0.0344062	1.77877	0.442957	protective	NA
KEGG_NEUROTROPHIN_SIGNALING_PATHWAY	REACTOME_ORGANELLE_BIOGENESIS_AND_MAINTENANCE	rs4791329	17	7693455	TP53	rs4273371	3	108119071	IFT57	recessive_dominant	0.0854606	0.122087	1.77838	0.671966	protective	NA
KEGG_NEUROTROPHIN_SIGNALING_PATHWAY	REACTOME_ORGANELLE_BIOGENESIS_AND_MAINTENANCE	rs6916254	6	136738115	MAP3K5	rs6751305	2	61876220	CCT4	dominant	0.160932	0.205327	1.77767	0.742314	protective	NA
KEGG_NEUROTROPHIN_SIGNALING_PATHWAY	REACTOME_ORGANELLE_BIOGENESIS_AND_MAINTENANCE	rs4877972	9	88989455	SHC3	rs10779788	1	5945990	NPHP4	dominant	0.369589	0.421754	1.77734	0.803804	protective	NA
KEGG_NEUROTROPHIN_SIGNALING_PATHWAY	REACTOME_ORGANELLE_BIOGENESIS_AND_MAINTENANCE	rs529025836	17	63636272	MAP3K3	rs11429505	8	70278596	NCOA2	recessive_dominant	0.158713	0.200888	1.77678	0.750448	protective	NA
KEGG_NEUROTROPHIN_SIGNALING_PATHWAY	REACTOME_ORGANELLE_BIOGENESIS_AND_MAINTENANCE	rs13322072	3	179282730	PIK3CA	rs37815	16	3455912	CLUAP1	dominant	0.174251	0.221976	1.77594	0.73963	protective	NA
KEGG_NEUROTROPHIN_SIGNALING_PATHWAY	REACTOME_ORGANELLE_BIOGENESIS_AND_MAINTENANCE	rs3861824	1	58807217	JUN	rs6074138	20	10418801	MKKS	recessive_dominant	0.0244173	0.0466149	1.77522	0.511891	protective	NA
KEGG_NEUROTROPHIN_SIGNALING_PATHWAY	REACTOME_ORGANELLE_BIOGENESIS_AND_MAINTENANCE	rs139443871	19	4165336	MAP2K2	rs12679073	8	130222310	ASAP1	recessive_dominant	0.0865705	0.120977	1.77491	0.688642	protective	NA
KEGG_NEUROTROPHIN_SIGNALING_PATHWAY	REACTOME_ORGANELLE_BIOGENESIS_AND_MAINTENANCE	rs6094276	20	44949946	YWHAB	rs4731710	7	130481474	CEP41	recessive_dominant	0.0421754	0.0699223	1.77434	0.585701	protective	NA
KEGG_NEUROTROPHIN_SIGNALING_PATHWAY	REACTOME_ORGANELLE_BIOGENESIS_AND_MAINTENANCE	rs8078982	17	49485912	NGFR	rs2072826	6	135253558	AHI1	recessive_dominant	0.0532741	0.082131	1.77429	0.628877	protective	NA
KEGG_NEUROTROPHIN_SIGNALING_PATHWAY	REACTOME_ORGANELLE_BIOGENESIS_AND_MAINTENANCE	rs9347129	6	166895934	RPS6KA2	rs10421830	19	45210634	MARK4	recessive_dominant	0.0144284	0.0321865	1.77429	0.440199	protective	NA
KEGG_NEUROTROPHIN_SIGNALING_PATHWAY	REACTOME_ORGANELLE_BIOGENESIS_AND_MAINTENANCE	rs12070845	1	109261850	SORT1	rs5756349	22	37196680	SSTR3	recessive_dominant	0	0.00776915	1.77387	0	protective	NA
KEGG_NEUROTROPHIN_SIGNALING_PATHWAY	REACTOME_ORGANELLE_BIOGENESIS_AND_MAINTENANCE	rs12425324	12	111407697	SH2B3	rs37815	16	3455912	CLUAP1	dominant	0.206437	0.258602	1.77366	0.745809	protective	NA
KEGG_NEUROTROPHIN_SIGNALING_PATHWAY	REACTOME_ORGANELLE_BIOGENESIS_AND_MAINTENANCE	rs2169633	15	66467291	MAP2K1	rs4917904	10	102447292	ACTR1A	recessive_dominant	0.0554939	0.0843507	1.77335	0.637795	protective	NA
KEGG_NEUROTROPHIN_SIGNALING_PATHWAY	REACTOME_ORGANELLE_BIOGENESIS_AND_MAINTENANCE	rs998521	15	66407072	MAP2K1	rs71421442	14	57152633	EXOC5	dominant	0.156493	0.206437	1.77297	0.713179	protective	NA
KEGG_NEUROTROPHIN_SIGNALING_PATHWAY	REACTOME_ORGANELLE_BIOGENESIS_AND_MAINTENANCE	rs4791329	17	7693455	TP53	rs2847251	18	12751036	CEP76	recessive_dominant	0.0577137	0.0876804	1.77112	0.637295	protective	NA
KEGG_NEUROTROPHIN_SIGNALING_PATHWAY	REACTOME_ORGANELLE_BIOGENESIS_AND_MAINTENANCE	rs2908290	7	44216137	CAMK2B	rs10402773	19	33004535	CEP89	dominant	0.447281	0.502775	1.76765	0.800305	protective	NA
KEGG_NEUROTROPHIN_SIGNALING_PATHWAY	REACTOME_ORGANELLE_BIOGENESIS_AND_MAINTENANCE	rs4877972	9	88989455	SHC3	rs10402773	19	33004535	CEP89	dominant	0.448391	0.503885	1.76747	0.800344	protective	NA
KEGG_NEUROTROPHIN_SIGNALING_PATHWAY	REACTOME_ORGANELLE_BIOGENESIS_AND_MAINTENANCE	rs9759629	4	113743604	CAMK2D	rs10812525	9	27084462	IFT74	dominant	0.338513	0.391787	1.76516	0.794437	protective	NA
KEGG_NEUROTROPHIN_SIGNALING_PATHWAY	REACTOME_ORGANELLE_BIOGENESIS_AND_MAINTENANCE	rs147511193	3	119945039	GSK3B	rs11144552	9	78262765	CEP78	recessive_dominant	0	0.00776915	1.76513	0	protective	NA
KEGG_NEUROTROPHIN_SIGNALING_PATHWAY	REACTOME_ORGANELLE_BIOGENESIS_AND_MAINTENANCE	rs2908290	7	44216137	CAMK2B	rs7848846	9	137151050	SSNA1	recessive	0.00887902	0.0255272	1.76497	0.341984	protective	NA
KEGG_NEUROTROPHIN_SIGNALING_PATHWAY	REACTOME_ORGANELLE_BIOGENESIS_AND_MAINTENANCE	rs2908290	7	44216137	CAMK2B	rs12761305	10	92814031	EXOC6	dominant	0.413984	0.467259	1.76402	0.805442	protective	NA
KEGG_NEUROTROPHIN_SIGNALING_PATHWAY	REACTOME_ORGANELLE_BIOGENESIS_AND_MAINTENANCE	rs7076160	10	48473929	MAPK8	rs6751305	2	61876220	CCT4	recessive_dominant	0.082131	0.116537	1.76341	0.678344	protective	NA
KEGG_NEUROTROPHIN_SIGNALING_PATHWAY	REACTOME_ORGANELLE_BIOGENESIS_AND_MAINTENANCE	rs9347129	6	166895934	RPS6KA2	rs10418927	19	16168734	RAB8A	recessive_dominant	0.017758	0.0388457	1.76209	0.447328	protective	NA
KEGG_NEUROTROPHIN_SIGNALING_PATHWAY	REACTOME_ORGANELLE_BIOGENESIS_AND_MAINTENANCE	rs201635960	5	180199887	MAPK9	rs57156634	11	103446048	DYNC2H1	dominant	0.082131	0.115427	1.76095	0.685727	protective	NA
KEGG_NEUROTROPHIN_SIGNALING_PATHWAY	REACTOME_ORGANELLE_BIOGENESIS_AND_MAINTENANCE	rs2517	9	130855035	ABL1	rs12679073	8	130222310	ASAP1	recessive_dominant	0.0144284	0.0321865	1.75761	0.440199	protective	NA
KEGG_NEUROTROPHIN_SIGNALING_PATHWAY	REACTOME_ORGANELLE_BIOGENESIS_AND_MAINTENANCE	rs6916254	6	136738115	MAP3K5	rs9294982	6	169696898	TCTE3	recessive_dominant	0.0466149	0.0732519	1.75754	0.618584	protective	2.209e-05
KEGG_NEUROTROPHIN_SIGNALING_PATHWAY	REACTOME_ORGANELLE_BIOGENESIS_AND_MAINTENANCE	rs9347129	6	166895934	RPS6KA2	rs2212010	21	25811151	GABPA	recessive_dominant	0.0155383	0.0344062	1.75743	0.442957	protective	NA
KEGG_NEUROTROPHIN_SIGNALING_PATHWAY	REACTOME_ORGANELLE_BIOGENESIS_AND_MAINTENANCE	rs9347129	6	166895934	RPS6KA2	rs4679312	3	126676788	CHCHD6	recessive	0.00887902	0.0244173	1.7573	0.357935	protective	NA
KEGG_NEUROTROPHIN_SIGNALING_PATHWAY	REACTOME_ORGANELLE_BIOGENESIS_AND_MAINTENANCE	rs2908290	7	44216137	CAMK2B	rs73094828	20	32316895	KIF3B	dominant	0.144284	0.186459	1.75579	0.735671	protective	NA
KEGG_NEUROTROPHIN_SIGNALING_PATHWAY	REACTOME_ORGANELLE_BIOGENESIS_AND_MAINTENANCE	rs7222654	17	8932404	PIK3R5	rs55759073	19	619337	POLRMT	dominant	0.0577137	0.0887902	1.75291	0.628563	protective	NA
KEGG_NEUROTROPHIN_SIGNALING_PATHWAY	REACTOME_ORGANELLE_BIOGENESIS_AND_MAINTENANCE	rs112761996	7	6329248	RAC1	rs4917904	10	102447292	ACTR1A	recessive_dominant	0	0.00332963	1.75289	0	protective	NA
KEGG_NEUROTROPHIN_SIGNALING_PATHWAY	REACTOME_ORGANELLE_BIOGENESIS_AND_MAINTENANCE	rs200089036	19	38902723	NFKBIB	rs3806410	1	156337134	CCT3	recessive_dominant	0.0854606	0.119867	1.75271	0.68614	protective	NA
KEGG_NEUROTROPHIN_SIGNALING_PATHWAY	REACTOME_ORGANELLE_BIOGENESIS_AND_MAINTENANCE	rs4791329	17	7693455	TP53	rs979802	11	103388805	DYNC2H1	recessive	0.0221976	0.0443951	1.75155	0.488649	protective	NA
KEGG_NEUROTROPHIN_SIGNALING_PATHWAY	REACTOME_ORGANELLE_BIOGENESIS_AND_MAINTENANCE	rs9759629	4	113743604	CAMK2D	rs3806410	1	156337134	CCT3	dominant	0.244173	0.298557	1.75154	0.758998	protective	NA
KEGG_NEUROTROPHIN_SIGNALING_PATHWAY	REACTOME_ORGANELLE_BIOGENESIS_AND_MAINTENANCE	rs2169633	15	66467291	MAP2K1	rs12679073	8	130222310	ASAP1	recessive_dominant	0.0710322	0.103219	1.75146	0.664329	protective	NA
KEGG_NEUROTROPHIN_SIGNALING_PATHWAY	REACTOME_ORGANELLE_BIOGENESIS_AND_MAINTENANCE	rs62315570	4	86331750	MAPK10	rs72742147	9	78289116	CEP78	recessive_dominant	0.0122087	0.0288568	1.7502	0.415946	protective	NA
KEGG_NEUROTROPHIN_SIGNALING_PATHWAY	REACTOME_ORGANELLE_BIOGENESIS_AND_MAINTENANCE	rs557328	19	7902965	MAP2K7	rs11429505	8	70278596	NCOA2	dominant	0.352941	0.407325	1.74999	0.793659	protective	NA
KEGG_NEUROTROPHIN_SIGNALING_PATHWAY	REACTOME_ORGANELLE_BIOGENESIS_AND_MAINTENANCE	rs2908290	7	44216137	CAMK2B	rs7833836	8	17935642	PCM1	dominant	0.435072	0.489456	1.74978	0.803318	protective	NA
KEGG_NEUROTROPHIN_SIGNALING_PATHWAY	REACTOME_ORGANELLE_BIOGENESIS_AND_MAINTENANCE	rs998521	15	66407072	MAP2K1	rs11419917	22	31576509	SFI1	recessive	0.00332963	0.0144284	1.74903	0.228199	protective	NA
KEGG_NEUROTROPHIN_SIGNALING_PATHWAY	REACTOME_ORGANELLE_BIOGENESIS_AND_MAINTENANCE	rs531967415	1	114764150	NRAS	rs113230548	2	231791498	PDE6D	recessive_dominant	0.00332963	0.0155383	1.74718	0.211661	protective	NA
KEGG_NEUROTROPHIN_SIGNALING_PATHWAY	REACTOME_ORGANELLE_BIOGENESIS_AND_MAINTENANCE	rs2239798	6	36177857	MAPK13	rs73886521	22	46273829	PPARA	dominant	0.0643729	0.0943396	1.747	0.660498	protective	NA
KEGG_NEUROTROPHIN_SIGNALING_PATHWAY	REACTOME_ORGANELLE_BIOGENESIS_AND_MAINTENANCE	rs11063604	12	5408423	NTF3	rs4761574	12	94503883	CEP83	recessive_dominant	0.0244173	0.045505	1.74602	0.524987	protective	0.001
KEGG_NEUROTROPHIN_SIGNALING_PATHWAY	REACTOME_ORGANELLE_BIOGENESIS_AND_MAINTENANCE	rs529025836	17	63636272	MAP3K3	rs4726122	7	151675463	PRKAG2	recessive_dominant	0.132075	0.172031	1.74531	0.732398	protective	NA
KEGG_NEUROTROPHIN_SIGNALING_PATHWAY	REACTOME_ORGANELLE_BIOGENESIS_AND_MAINTENANCE	rs7805383	7	140908104	BRAF	rs554784053	7	129217256	SMO	recessive_dominant	0.0244173	0.0488346	1.74471	0.487486	protective	0.002
KEGG_NEUROTROPHIN_SIGNALING_PATHWAY	REACTOME_ORGANELLE_BIOGENESIS_AND_MAINTENANCE	rs7076160	10	48473929	MAPK8	rs72742147	9	78289116	CEP78	dominant	0.0432852	0.0710322	1.74432	0.591702	protective	NA
KEGG_NEUROTROPHIN_SIGNALING_PATHWAY	REACTOME_ORGANELLE_BIOGENESIS_AND_MAINTENANCE	rs11063604	12	5408423	NTF3	rs55924499	7	151517706	PRKAG2	recessive_dominant	0.0199778	0.0399556	1.74376	0.489807	protective	NA
KEGG_NEUROTROPHIN_SIGNALING_PATHWAY	REACTOME_ORGANELLE_BIOGENESIS_AND_MAINTENANCE	rs10772805	12	14912466	ARHGDIB	rs11287280	3	45836823	LZTFL1	recessive_dominant	0.0133185	0.0321865	1.74302	0.40588	protective	NA
KEGG_NEUROTROPHIN_SIGNALING_PATHWAY	REACTOME_ORGANELLE_BIOGENESIS_AND_MAINTENANCE	rs2612043	12	66183500	IRAK3	rs71626264	3	177098521	TBL1XR1	dominant	0.169811	0.213097	1.74281	0.755327	protective	NA
KEGG_NEUROTROPHIN_SIGNALING_PATHWAY	REACTOME_ORGANELLE_BIOGENESIS_AND_MAINTENANCE	rs557328	19	7902965	MAP2K7	rs4679312	3	126676788	CHCHD6	recessive	0.0310766	0.054384	1.74195	0.557683	protective	NA
KEGG_NEUROTROPHIN_SIGNALING_PATHWAY	REACTOME_ORGANELLE_BIOGENESIS_AND_MAINTENANCE	rs8142362	22	20979079	CRKL	rs2388229	16	53556997	RPGRIP1L	recessive_dominant	0.109878	0.155383	1.74163	0.670992	protective	NA
KEGG_NEUROTROPHIN_SIGNALING_PATHWAY	REACTOME_ORGANELLE_BIOGENESIS_AND_MAINTENANCE	rs11063604	12	5408423	NTF3	rs34487560	4	56029268	CEP135	recessive_dominant	0.0288568	0.0510544	1.74055	0.552298	protective	NA
KEGG_NEUROTROPHIN_SIGNALING_PATHWAY	REACTOME_ORGANELLE_BIOGENESIS_AND_MAINTENANCE	rs1902716	10	48395086	MAPK8	rs62151837	2	73390396	ALMS1	dominant	0.214206	0.259711	1.7369	0.777023	protective	NA
KEGG_NEUROTROPHIN_SIGNALING_PATHWAY	REACTOME_ORGANELLE_BIOGENESIS_AND_MAINTENANCE	rs2908290	7	44216137	CAMK2B	rs6855480	4	23747576	PPARGC1A	recessive_dominant	0.0488346	0.0765816	1.73651	0.619079	protective	NA
KEGG_NEUROTROPHIN_SIGNALING_PATHWAY	REACTOME_ORGANELLE_BIOGENESIS_AND_MAINTENANCE	rs4144887	6	166747512	RPS6KA2	rs73916491	20	59046695	TUBB1	dominant	0.0432852	0.0688124	1.73513	0.612248	protective	NA
KEGG_NEUROTROPHIN_SIGNALING_PATHWAY	REACTOME_ORGANELLE_BIOGENESIS_AND_MAINTENANCE	rs34137352	1	3694480	TP73	rs28588283	4	55820993	EXOC1	recessive_dominant	0.017758	0.036626	1.73291	0.475535	protective	NA
KEGG_NEUROTROPHIN_SIGNALING_PATHWAY	REACTOME_ORGANELLE_BIOGENESIS_AND_MAINTENANCE	rs68104879	17	8896949	PIK3R5	rs2369963	3	132730101	NPHP3	recessive_dominant	0.0688124	0.102109	1.73176	0.649816	protective	NA
KEGG_NEUROTROPHIN_SIGNALING_PATHWAY	REACTOME_ORGANELLE_BIOGENESIS_AND_MAINTENANCE	rs2075076	7	44274642	CAMK2B	rs200502024	3	121820354	IQCB1	recessive_dominant	0.00776915	0.0199778	1.73111	0.384104	protective	NA
KEGG_NEUROTROPHIN_SIGNALING_PATHWAY	REACTOME_ORGANELLE_BIOGENESIS_AND_MAINTENANCE	rs7805383	7	140908104	BRAF	rs10077397	5	88903298	MEF2C	recessive_dominant	0.0932297	0.129856	1.73111	0.68895	protective	NA
KEGG_NEUROTROPHIN_SIGNALING_PATHWAY	REACTOME_ORGANELLE_BIOGENESIS_AND_MAINTENANCE	rs55702801	14	73255495	PSEN1	rs2244700	7	133987374	EXOC4	recessive_dominant	0.0466149	0.0765816	1.73046	0.589563	protective	NA
KEGG_NEUROTROPHIN_SIGNALING_PATHWAY	REACTOME_ORGANELLE_BIOGENESIS_AND_MAINTENANCE	rs1902716	10	48395086	MAPK8	rs1396893	8	55779322	TGS1	dominant	0.219756	0.266371	1.73044	0.775711	protective	NA
KEGG_NEUROTROPHIN_SIGNALING_PATHWAY	REACTOME_ORGANELLE_BIOGENESIS_AND_MAINTENANCE	rs55702801	14	73255495	PSEN1	rs10812525	9	27084462	IFT74	dominant	0.163152	0.206437	1.73029	0.749444	protective	NA
KEGG_NEUROTROPHIN_SIGNALING_PATHWAY	REACTOME_ORGANELLE_BIOGENESIS_AND_MAINTENANCE	rs2087072	1	243829549	AKT3	rs200502024	3	121820354	IQCB1	recessive_dominant	0.0099889	0.0199778	1.73017	0.494955	protective	NA
KEGG_NEUROTROPHIN_SIGNALING_PATHWAY	REACTOME_ORGANELLE_BIOGENESIS_AND_MAINTENANCE	rs6916254	6	136738115	MAP3K5	rs12302358	12	110239437	IFT81	dominant	0.0566038	0.0865705	1.72993	0.633077	protective	NA
KEGG_NEUROTROPHIN_SIGNALING_PATHWAY	REACTOME_ORGANELLE_BIOGENESIS_AND_MAINTENANCE	rs13322072	3	179282730	PIK3CA	rs1365962	2	218857832	PRKAG3	recessive_dominant	0.0799112	0.117647	1.72536	0.651387	protective	NA
KEGG_NEUROTROPHIN_SIGNALING_PATHWAY	REACTOME_ORGANELLE_BIOGENESIS_AND_MAINTENANCE	rs9347129	6	166895934	RPS6KA2	rs227911	17	64541343	POLG2	recessive_dominant	0.0122087	0.0288568	1.72509	0.415946	protective	NA
KEGG_NEUROTROPHIN_SIGNALING_PATHWAY	REACTOME_ORGANELLE_BIOGENESIS_AND_MAINTENANCE	rs2908290	7	44216137	CAMK2B	rs10779788	1	5945990	NPHP4	dominant	0.376249	0.428413	1.72493	0.804791	protective	NA
KEGG_NEUROTROPHIN_SIGNALING_PATHWAY	REACTOME_ORGANELLE_BIOGENESIS_AND_MAINTENANCE	rs998521	15	66407072	MAP2K1	rs7804751	7	151645370	PRKAG2	dominant	0.225305	0.279689	1.72441	0.749005	protective	NA
KEGG_NEUROTROPHIN_SIGNALING_PATHWAY	REACTOME_ORGANELLE_BIOGENESIS_AND_MAINTENANCE	rs998521	15	66407072	MAP2K1	rs7247709	19	52240015	PPP2R1A	dominant	0.225305	0.279689	1.72441	0.749005	protective	NA
KEGG_NEUROTROPHIN_SIGNALING_PATHWAY	REACTOME_ORGANELLE_BIOGENESIS_AND_MAINTENANCE	rs2908290	7	44216137	CAMK2B	rs34144731	4	55921913	CEP135/EXOC1	recessive_dominant	0.00665927	0.0233074	1.72398	0.280926	protective	NA
KEGG_NEUROTROPHIN_SIGNALING_PATHWAY	REACTOME_ORGANELLE_BIOGENESIS_AND_MAINTENANCE	rs139443871	19	4165336	MAP2K2	rs7247709	19	52240015	PPP2R1A	recessive_dominant	0.107658	0.147614	1.72247	0.696667	protective	4.897e-04
KEGG_NEUROTROPHIN_SIGNALING_PATHWAY	REACTOME_ORGANELLE_BIOGENESIS_AND_MAINTENANCE	rs201635960	5	180199887	MAPK9	rs7247709	19	52240015	PPP2R1A	recessive	0.0166482	0.0344062	1.72201	0.475133	protective	NA
KEGG_NEUROTROPHIN_SIGNALING_PATHWAY	REACTOME_ORGANELLE_BIOGENESIS_AND_MAINTENANCE	rs13322072	3	179282730	PIK3CA	rs4329481	1	20658089	KIF17	recessive_dominant	0.0721421	0.109878	1.72128	0.629863	protective	NA
KEGG_NEUROTROPHIN_SIGNALING_PATHWAY	REACTOME_ORGANELLE_BIOGENESIS_AND_MAINTENANCE	rs8142362	22	20979079	CRKL	rs6534321	4	122692023	BBS12	dominant	0.169811	0.213097	1.72105	0.755327	protective	NA
KEGG_NEUROTROPHIN_SIGNALING_PATHWAY	REACTOME_ORGANELLE_BIOGENESIS_AND_MAINTENANCE	rs55967668	5	68241438	PIK3R1	rs113291905	19	14136613	PRKACA	recessive_dominant	0.00110988	0.0099889	1.72082	0.110123	protective	NA
KEGG_NEUROTROPHIN_SIGNALING_PATHWAY	REACTOME_ORGANELLE_BIOGENESIS_AND_MAINTENANCE	rs9759629	4	113743604	CAMK2D	rs10402773	19	33004535	CEP89	dominant	0.400666	0.45505	1.71871	0.800592	protective	NA
KEGG_NEUROTROPHIN_SIGNALING_PATHWAY	REACTOME_ORGANELLE_BIOGENESIS_AND_MAINTENANCE	rs200089036	19	38902723	NFKBIB	rs10812525	9	27084462	IFT74	recessive_dominant	0.106548	0.142064	1.71863	0.720186	protective	NA
KEGG_NEUROTROPHIN_SIGNALING_PATHWAY	REACTOME_ORGANELLE_BIOGENESIS_AND_MAINTENANCE	rs998521	15	66407072	MAP2K1	rs11429505	8	70278596	NCOA2	dominant	0.245283	0.300777	1.71671	0.755535	protective	NA
KEGG_NEUROTROPHIN_SIGNALING_PATHWAY	REACTOME_ORGANELLE_BIOGENESIS_AND_MAINTENANCE	rs9759629	4	113743604	CAMK2D	rs6961764	7	133131298	CHCHD3	dominant	0.437292	0.491676	1.71634	0.803434	protective	NA
KEGG_NEUROTROPHIN_SIGNALING_PATHWAY	REACTOME_ORGANELLE_BIOGENESIS_AND_MAINTENANCE	rs7222654	17	8932404	PIK3R5	rs17166570	5	132660439	KIF3A	dominant	0.0288568	0.0554939	1.71626	0.505737	protective	NA
KEGG_NEUROTROPHIN_SIGNALING_PATHWAY	REACTOME_ORGANELLE_BIOGENESIS_AND_MAINTENANCE	rs11063604	12	5408423	NTF3	rs7129263	11	248077	SIRT3	recessive_dominant	0.0166482	0.0355161	1.71443	0.459756	protective	NA
KEGG_NEUROTROPHIN_SIGNALING_PATHWAY	REACTOME_ORGANELLE_BIOGENESIS_AND_MAINTENANCE	rs2803965	14	73098014	PSEN1	rs10812525	9	27084462	IFT74	dominant	0.318535	0.368479	1.71406	0.801102	protective	NA
KEGG_NEUROTROPHIN_SIGNALING_PATHWAY	REACTOME_ORGANELLE_BIOGENESIS_AND_MAINTENANCE	rs529025836	17	63636272	MAP3K3	rs7798741	7	33585000	BBS9	recessive_dominant	0.153163	0.194229	1.71385	0.750331	protective	NA
KEGG_NEUROTROPHIN_SIGNALING_PATHWAY	REACTOME_ORGANELLE_BIOGENESIS_AND_MAINTENANCE	rs2803965	14	73098014	PSEN1	rs2369963	3	132730101	NPHP3	recessive_dominant	0.0654828	0.0976693	1.71338	0.647363	protective	NA
KEGG_NEUROTROPHIN_SIGNALING_PATHWAY	REACTOME_ORGANELLE_BIOGENESIS_AND_MAINTENANCE	rs7482257	11	27755298	BDNF	rs4917904	10	102447292	ACTR1A	recessive_dominant	0.0754717	0.108768	1.71207	0.668888	protective	NA
KEGG_NEUROTROPHIN_SIGNALING_PATHWAY	REACTOME_ORGANELLE_BIOGENESIS_AND_MAINTENANCE	rs8142362	22	20979079	CRKL	rs7804751	7	151645370	PRKAG2	recessive_dominant	0.108768	0.144284	1.71192	0.723805	protective	NA
KEGG_NEUROTROPHIN_SIGNALING_PATHWAY	REACTOME_ORGANELLE_BIOGENESIS_AND_MAINTENANCE	rs59425633	2	9585705	YWHAQ	rs10460000	18	12320551	TUBB6	recessive_dominant	0.0166482	0.0355161	1.71147	0.459756	protective	NA
KEGG_NEUROTROPHIN_SIGNALING_PATHWAY	REACTOME_ORGANELLE_BIOGENESIS_AND_MAINTENANCE	rs9759629	4	113743604	CAMK2D	rs4821542	22	37252918	SSTR3	recessive_dominant	0.0199778	0.0410655	1.71062	0.476018	protective	NA
KEGG_NEUROTROPHIN_SIGNALING_PATHWAY	REACTOME_ORGANELLE_BIOGENESIS_AND_MAINTENANCE	rs62315570	4	86331750	MAPK10	rs1365962	2	218857832	PRKAG3	recessive_dominant	0.0854606	0.118757	1.70993	0.693426	protective	NA
KEGG_NEUROTROPHIN_SIGNALING_PATHWAY	REACTOME_ORGANELLE_BIOGENESIS_AND_MAINTENANCE	rs325923	1	111691513	RAP1A	rs200502024	3	121820354	IQCB1	recessive_dominant	0.0133185	0.0310766	1.70932	0.420858	protective	NA
KEGG_NEUROTROPHIN_SIGNALING_PATHWAY	REACTOME_ORGANELLE_BIOGENESIS_AND_MAINTENANCE	rs7614231	3	120097127	GSK3B	rs57156634	11	103446048	DYNC2H1	recessive_dominant	0.00221976	0.0133185	1.70722	0.164813	protective	NA
KEGG_NEUROTROPHIN_SIGNALING_PATHWAY	REACTOME_ORGANELLE_BIOGENESIS_AND_MAINTENANCE	rs4791329	17	7693455	TP53	rs7966731	12	96871649	NEDD1	recessive_dominant	0.0943396	0.128746	1.70655	0.704921	protective	NA
KEGG_NEUROTROPHIN_SIGNALING_PATHWAY	REACTOME_ORGANELLE_BIOGENESIS_AND_MAINTENANCE	rs55702801	14	73255495	PSEN1	rs200502024	3	121820354	IQCB1	recessive_dominant	0.00110988	0.0133185	1.70596	0.0823148	protective	NA
KEGG_NEUROTROPHIN_SIGNALING_PATHWAY	REACTOME_ORGANELLE_BIOGENESIS_AND_MAINTENANCE	rs10413331	19	58203728	ZNF274	rs533119830	22	40656205	MCHR1	recessive_dominant	0.0466149	0.0765816	1.70497	0.589563	protective	NA
KEGG_NEUROTROPHIN_SIGNALING_PATHWAY	REACTOME_ORGANELLE_BIOGENESIS_AND_MAINTENANCE	rs557328	19	7902965	MAP2K7	rs10421830	19	45210634	MARK4	recessive_dominant	0.0432852	0.0688124	1.7042	0.612248	protective	7.602e-04
KEGG_NEUROTROPHIN_SIGNALING_PATHWAY	REACTOME_ORGANELLE_BIOGENESIS_AND_MAINTENANCE	rs112761996	7	6329248	RAC1	rs4726122	7	151675463	PRKAG2	recessive_dominant	0	0.00443951	1.70385	0	protective	3.579e-04
KEGG_NEUROTROPHIN_SIGNALING_PATHWAY	REACTOME_ORGANELLE_BIOGENESIS_AND_MAINTENANCE	rs529025836	17	63636272	MAP3K3	rs2130923	4	23781504	PPARGC1A	recessive_dominant	0.0732519	0.106548	1.70282	0.662799	protective	NA
KEGG_NEUROTROPHIN_SIGNALING_PATHWAY	REACTOME_ORGANELLE_BIOGENESIS_AND_MAINTENANCE	rs2075076	7	44274642	CAMK2B	rs11287280	3	45836823	LZTFL1	recessive_dominant	0.0144284	0.0321865	1.70256	0.440199	protective	NA
KEGG_NEUROTROPHIN_SIGNALING_PATHWAY	REACTOME_ORGANELLE_BIOGENESIS_AND_MAINTENANCE	rs2537850	14	90970875	RPS6KA5	rs2655172	8	70154581	NCOA2	recessive_dominant	0.0776915	0.117647	1.70256	0.631769	protective	NA
KEGG_NEUROTROPHIN_SIGNALING_PATHWAY	REACTOME_ORGANELLE_BIOGENESIS_AND_MAINTENANCE	rs78011207	2	226712412	IRS1	rs2847251	18	12751036	CEP76	recessive	0	0.0099889	1.70221	0	protective	NA
KEGG_NEUROTROPHIN_SIGNALING_PATHWAY	REACTOME_ORGANELLE_BIOGENESIS_AND_MAINTENANCE	rs529025836	17	63636272	MAP3K3	rs201143490	9	136452021	INPP5E	recessive_dominant	0.112098	0.149834	1.70216	0.716352	protective	NA
KEGG_NEUROTROPHIN_SIGNALING_PATHWAY	REACTOME_ORGANELLE_BIOGENESIS_AND_MAINTENANCE	rs62315570	4	86331750	MAPK10	rs553512184	1	153989995	CRTC2	recessive_dominant	0.0932297	0.128746	1.70116	0.695775	protective	NA
KEGG_NEUROTROPHIN_SIGNALING_PATHWAY	REACTOME_ORGANELLE_BIOGENESIS_AND_MAINTENANCE	rs7076160	10	48473929	MAPK8	rs7798741	7	33585000	BBS9	recessive_dominant	0.0710322	0.103219	1.70115	0.664329	protective	NA
KEGG_NEUROTROPHIN_SIGNALING_PATHWAY	REACTOME_ORGANELLE_BIOGENESIS_AND_MAINTENANCE	rs72765496	5	56945800	MAP3K1	rs76940793	3	160447833	IFT80	dominant	0.00443951	0.0166482	1.70069	0.263397	protective	NA
KEGG_NEUROTROPHIN_SIGNALING_PATHWAY	REACTOME_ORGANELLE_BIOGENESIS_AND_MAINTENANCE	rs2517	9	130855035	ABL1	rs10812525	9	27084462	IFT74	dominant	0.218646	0.267481	1.70045	0.766338	protective	0.001
KEGG_NEUROTROPHIN_SIGNALING_PATHWAY	REACTOME_ORGANELLE_BIOGENESIS_AND_MAINTENANCE	rs8142362	22	20979079	CRKL	rs11287280	3	45836823	LZTFL1	recessive_dominant	0.0099889	0.0221976	1.7002	0.444451	protective	NA
KEGG_NEUROTROPHIN_SIGNALING_PATHWAY	REACTOME_ORGANELLE_BIOGENESIS_AND_MAINTENANCE	rs10806852	6	166864334	RPS6KA2	rs4959880	6	442206	EXOC2	dominant	0.127636	0.168701	1.6999	0.720964	protective	0.005
KEGG_NEUROTROPHIN_SIGNALING_PATHWAY	REACTOME_ORGANELLE_BIOGENESIS_AND_MAINTENANCE	rs2169633	15	66467291	MAP2K1	rs28588283	4	55820993	EXOC1	recessive_dominant	0.0566038	0.0843507	1.69988	0.651316	protective	NA
KEGG_NEUROTROPHIN_SIGNALING_PATHWAY	REACTOME_ORGANELLE_BIOGENESIS_AND_MAINTENANCE	rs76273626	18	63123969	BCL2	rs59972802	17	2672013	PAFAH1B1	recessive	0.00110988	0.0099889	1.69961	0.110123	protective	NA
KEGG_NEUROTROPHIN_SIGNALING_PATHWAY	REACTOME_ORGANELLE_BIOGENESIS_AND_MAINTENANCE	rs9947044	18	63263494	BCL2	rs533119830	22	40656205	MCHR1	recessive_dominant	0.0643729	0.0987791	1.69859	0.627721	protective	NA
KEGG_NEUROTROPHIN_SIGNALING_PATHWAY	REACTOME_ORGANELLE_BIOGENESIS_AND_MAINTENANCE	rs7076160	10	48473929	MAPK8	rs7247709	19	52240015	PPP2R1A	dominant	0.254162	0.304107	1.69825	0.7798	protective	NA
KEGG_NEUROTROPHIN_SIGNALING_PATHWAY	REACTOME_ORGANELLE_BIOGENESIS_AND_MAINTENANCE	rs529025836	17	63636272	MAP3K3	rs4870327	6	155281493	TFB1M	recessive_dominant	0.109878	0.147614	1.69616	0.712804	protective	NA
KEGG_NEUROTROPHIN_SIGNALING_PATHWAY	REACTOME_ORGANELLE_BIOGENESIS_AND_MAINTENANCE	rs7805383	7	140908104	BRAF	rs2489138	1	156526564	MEF2D	dominant	0.436182	0.492786	1.69569	0.796273	protective	NA
KEGG_NEUROTROPHIN_SIGNALING_PATHWAY	REACTOME_ORGANELLE_BIOGENESIS_AND_MAINTENANCE	rs13322072	3	179282730	PIK3CA	rs4936388	11	117440404	CEP164	dominant	0.207547	0.256382	1.69487	0.759637	protective	NA
KEGG_NEUROTROPHIN_SIGNALING_PATHWAY	REACTOME_ORGANELLE_BIOGENESIS_AND_MAINTENANCE	rs66508783	19	18115826	PIK3R2	rs2388229	16	53556997	RPGRIP1L	recessive	0.00443951	0.0166482	1.69452	0.263397	protective	NA
KEGG_NEUROTROPHIN_SIGNALING_PATHWAY	REACTOME_ORGANELLE_BIOGENESIS_AND_MAINTENANCE	rs7033070	9	131586374	RAPGEF1	rs74183366	19	35674986	HAUS5	recessive	0.0099889	0.0288568	1.69251	0.339557	protective	NA
KEGG_NEUROTROPHIN_SIGNALING_PATHWAY	REACTOME_ORGANELLE_BIOGENESIS_AND_MAINTENANCE	rs998521	15	66407072	MAP2K1	rs10812525	9	27084462	IFT74	dominant	0.230855	0.285239	1.69134	0.752113	protective	NA
KEGG_NEUROTROPHIN_SIGNALING_PATHWAY	REACTOME_ORGANELLE_BIOGENESIS_AND_MAINTENANCE	rs200089036	19	38902723	NFKBIB	rs62151837	2	73390396	ALMS1	recessive_dominant	0.0987791	0.134295	1.69097	0.706551	protective	NA
KEGG_NEUROTROPHIN_SIGNALING_PATHWAY	REACTOME_ORGANELLE_BIOGENESIS_AND_MAINTENANCE	rs2169633	15	66467291	MAP2K1	rs6961764	7	133131298	CHCHD3	recessive_dominant	0.0899001	0.123196	1.6894	0.703032	protective	NA
KEGG_NEUROTROPHIN_SIGNALING_PATHWAY	REACTOME_ORGANELLE_BIOGENESIS_AND_MAINTENANCE	rs62315570	4	86331750	MAPK10	rs2356069	7	139162346	TTC26	recessive	0.0110988	0.0277469	1.68868	0.393266	protective	NA
KEGG_NEUROTROPHIN_SIGNALING_PATHWAY	REACTOME_ORGANELLE_BIOGENESIS_AND_MAINTENANCE	rs56002030	19	49073984	NTF4	rs2130923	4	23781504	PPARGC1A	dominant	0.267481	0.315205	1.68696	0.793305	protective	NA
KEGG_NEUROTROPHIN_SIGNALING_PATHWAY	REACTOME_ORGANELLE_BIOGENESIS_AND_MAINTENANCE	rs56002030	19	49073984	NTF4	rs7438356	4	15624770	CC2D2A	recessive_dominant	0.116537	0.154273	1.68684	0.72313	protective	NA
KEGG_NEUROTROPHIN_SIGNALING_PATHWAY	REACTOME_ORGANELLE_BIOGENESIS_AND_MAINTENANCE	rs7805383	7	140908104	BRAF	rs34144731	4	55921913	CEP135/EXOC1	recessive_dominant	0.00776915	0.0233074	1.68663	0.328113	protective	NA
KEGG_NEUROTROPHIN_SIGNALING_PATHWAY	REACTOME_ORGANELLE_BIOGENESIS_AND_MAINTENANCE	rs4791329	17	7693455	TP53	rs4917904	10	102447292	ACTR1A	recessive	0.00665927	0.0221976	1.68619	0.295307	protective	NA
KEGG_NEUROTROPHIN_SIGNALING_PATHWAY	REACTOME_ORGANELLE_BIOGENESIS_AND_MAINTENANCE	rs11102837	1	115346655	NGF	rs7966731	12	96871649	NEDD1	recessive	0.0288568	0.0510544	1.68602	0.552298	protective	NA
KEGG_NEUROTROPHIN_SIGNALING_PATHWAY	REACTOME_ORGANELLE_BIOGENESIS_AND_MAINTENANCE	rs2169633	15	66467291	MAP2K1	rs1365962	2	218857832	PRKAG3	recessive_dominant	0.082131	0.114317	1.68595	0.693253	protective	NA
KEGG_NEUROTROPHIN_SIGNALING_PATHWAY	REACTOME_ORGANELLE_BIOGENESIS_AND_MAINTENANCE	rs17051913	9	89061524	SHC3	rs11668155	19	52247306	PPP2R1A	dominant	0.167592	0.211987	1.68458	0.748412	protective	NA
KEGG_NEUROTROPHIN_SIGNALING_PATHWAY	REACTOME_ORGANELLE_BIOGENESIS_AND_MAINTENANCE	rs76273626	18	63123969	BCL2	rs10779788	1	5945990	NPHP4	dominant	0.152053	0.200888	1.68453	0.713315	protective	NA
KEGG_NEUROTROPHIN_SIGNALING_PATHWAY	REACTOME_ORGANELLE_BIOGENESIS_AND_MAINTENANCE	rs11063604	12	5408423	NTF3	rs1556034	1	6689319	DNAJC11	recessive_dominant	0.0255272	0.0466149	1.68449	0.535769	protective	NA
KEGG_NEUROTROPHIN_SIGNALING_PATHWAY	REACTOME_ORGANELLE_BIOGENESIS_AND_MAINTENANCE	rs4307417	9	89218258	SHC3	rs4679312	3	126676788	CHCHD6	recessive	0.0421754	0.0688124	1.68437	0.595858	protective	NA
KEGG_NEUROTROPHIN_SIGNALING_PATHWAY	REACTOME_ORGANELLE_BIOGENESIS_AND_MAINTENANCE	rs529025836	17	63636272	MAP3K3	rs2655172	8	70154581	NCOA2	recessive_dominant	0.120977	0.166482	1.68402	0.689049	protective	NA
KEGG_NEUROTROPHIN_SIGNALING_PATHWAY	REACTOME_ORGANELLE_BIOGENESIS_AND_MAINTENANCE	rs2239798	6	36177857	MAPK13	rs2058594	14	76039214	IFT43	recessive_dominant	0.00776915	0.0221976	1.68366	0.344911	protective	NA
KEGG_NEUROTROPHIN_SIGNALING_PATHWAY	REACTOME_ORGANELLE_BIOGENESIS_AND_MAINTENANCE	rs12986190	19	40273038	AKT2	rs17166570	5	132660439	KIF3A	dominant	0.0255272	0.0510544	1.68138	0.486902	protective	NA
KEGG_NEUROTROPHIN_SIGNALING_PATHWAY	REACTOME_ORGANELLE_BIOGENESIS_AND_MAINTENANCE	rs17051913	9	89061524	SHC3	rs10460000	18	12320551	TUBB6	recessive_dominant	0.045505	0.0710322	1.68057	0.623492	protective	NA
KEGG_NEUROTROPHIN_SIGNALING_PATHWAY	REACTOME_ORGANELLE_BIOGENESIS_AND_MAINTENANCE	rs11102837	1	115346655	NGF	rs36222127	17	75876781	FBF1	recessive_dominant	0.082131	0.114317	1.67886	0.693253	protective	NA
KEGG_NEUROTROPHIN_SIGNALING_PATHWAY	REACTOME_ORGANELLE_BIOGENESIS_AND_MAINTENANCE	rs2239798	6	36177857	MAPK13	rs12819938	12	119702178	PRKAB1	recessive	0.00332963	0.0155383	1.67753	0.211661	protective	NA
KEGG_NEUROTROPHIN_SIGNALING_PATHWAY	REACTOME_ORGANELLE_BIOGENESIS_AND_MAINTENANCE	rs1007802	1	206735691	MAPKAPK2	rs11287280	3	45836823	LZTFL1	recessive_dominant	0.0155383	0.0332963	1.67739	0.458249	protective	NA
KEGG_NEUROTROPHIN_SIGNALING_PATHWAY	REACTOME_ORGANELLE_BIOGENESIS_AND_MAINTENANCE	rs325923	1	111691513	RAP1A	rs11287280	3	45836823	LZTFL1	recessive_dominant	0.0155383	0.0332963	1.67739	0.458249	protective	NA
KEGG_NEUROTROPHIN_SIGNALING_PATHWAY	REACTOME_ORGANELLE_BIOGENESIS_AND_MAINTENANCE	rs529025836	17	63636272	MAP3K3	rs536327334	13	20581760	IFT88	recessive_dominant	0.160932	0.201998	1.67689	0.757711	protective	NA
KEGG_NEUROTROPHIN_SIGNALING_PATHWAY	REACTOME_ORGANELLE_BIOGENESIS_AND_MAINTENANCE	rs4307417	9	89218258	SHC3	rs12302358	12	110239437	IFT81	recessive	0.00221976	0.0122087	1.67663	0.179998	protective	NA
KEGG_NEUROTROPHIN_SIGNALING_PATHWAY	REACTOME_ORGANELLE_BIOGENESIS_AND_MAINTENANCE	rs6924899	6	166476996	RPS6KA2	rs12302358	12	110239437	IFT81	recessive	0.00110988	0.0099889	1.67481	0.110123	protective	NA
KEGG_NEUROTROPHIN_SIGNALING_PATHWAY	REACTOME_ORGANELLE_BIOGENESIS_AND_MAINTENANCE	rs8078982	17	49485912	NGFR	rs4921870	8	18023154	PCM1	recessive	0.0144284	0.0310766	1.67444	0.456443	protective	NA
KEGG_NEUROTROPHIN_SIGNALING_PATHWAY	REACTOME_ORGANELLE_BIOGENESIS_AND_MAINTENANCE	rs9759629	4	113743604	CAMK2D	rs1365962	2	218857832	PRKAG3	recessive_dominant	0.0754717	0.107658	1.67443	0.676625	protective	NA
KEGG_NEUROTROPHIN_SIGNALING_PATHWAY	REACTOME_ORGANELLE_BIOGENESIS_AND_MAINTENANCE	rs9759629	4	113743604	CAMK2D	rs17166570	5	132660439	KIF3A	dominant	0.0643729	0.0976693	1.67438	0.635636	protective	NA
KEGG_NEUROTROPHIN_SIGNALING_PATHWAY	REACTOME_ORGANELLE_BIOGENESIS_AND_MAINTENANCE	rs139443871	19	4165336	MAP2K2	rs1365962	2	218857832	PRKAG3	recessive_dominant	0.0965594	0.130966	1.67147	0.70921	protective	NA
KEGG_NEUROTROPHIN_SIGNALING_PATHWAY	REACTOME_ORGANELLE_BIOGENESIS_AND_MAINTENANCE	rs12425324	12	111407697	SH2B3	rs11168720	12	49146750	TUBA1A/TUBA1B	recessive_dominant	0.0754717	0.106548	1.66967	0.684524	protective	7.878e-05
KEGG_NEUROTROPHIN_SIGNALING_PATHWAY	REACTOME_ORGANELLE_BIOGENESIS_AND_MAINTENANCE	rs147511193	3	119945039	GSK3B	rs28588283	4	55820993	EXOC1	recessive_dominant	0.0099889	0.0255272	1.66947	0.385163	protective	NA
KEGG_NEUROTROPHIN_SIGNALING_PATHWAY	REACTOME_ORGANELLE_BIOGENESIS_AND_MAINTENANCE	rs2908290	7	44216137	CAMK2B	rs2388229	16	53556997	RPGRIP1L	recessive_dominant	0.117647	0.155383	1.66933	0.724762	protective	NA
KEGG_NEUROTROPHIN_SIGNALING_PATHWAY	REACTOME_ORGANELLE_BIOGENESIS_AND_MAINTENANCE	rs10806852	6	166864334	RPS6KA2	rs7438356	4	15624770	CC2D2A	dominant	0.174251	0.219756	1.66902	0.749233	protective	NA
KEGG_NEUROTROPHIN_SIGNALING_PATHWAY	REACTOME_ORGANELLE_BIOGENESIS_AND_MAINTENANCE	rs55894401	16	81730962	PLCG2	rs200502024	3	121820354	IQCB1	recessive_dominant	0.00776915	0.0233074	1.6689	0.328113	protective	NA
KEGG_NEUROTROPHIN_SIGNALING_PATHWAY	REACTOME_ORGANELLE_BIOGENESIS_AND_MAINTENANCE	rs34137352	1	3694480	TP73	rs55924499	7	151517706	PRKAG2	dominant	0.115427	0.154273	1.66861	0.715344	protective	NA
KEGG_NEUROTROPHIN_SIGNALING_PATHWAY	REACTOME_ORGANELLE_BIOGENESIS_AND_MAINTENANCE	rs3844536	19	396948	SHC2	rs34144731	4	55921913	CEP135/EXOC1	recessive_dominant	0.00443951	0.017758	1.66851	0.246656	protective	NA
KEGG_NEUROTROPHIN_SIGNALING_PATHWAY	REACTOME_ORGANELLE_BIOGENESIS_AND_MAINTENANCE	rs2803965	14	73098014	PSEN1	rs4655200	1	20672101	KIF17	recessive_dominant	0.0332963	0.0588235	1.66757	0.551091	protective	NA
KEGG_NEUROTROPHIN_SIGNALING_PATHWAY	REACTOME_ORGANELLE_BIOGENESIS_AND_MAINTENANCE	rs2075076	7	44274642	CAMK2B	rs528424379	16	23661801	PLK1	dominant	0.0843507	0.116537	1.66643	0.698367	protective	NA
KEGG_NEUROTROPHIN_SIGNALING_PATHWAY	REACTOME_ORGANELLE_BIOGENESIS_AND_MAINTENANCE	rs2087072	1	243829549	AKT3	rs17166570	5	132660439	KIF3A	dominant	0.0510544	0.082131	1.66556	0.601264	protective	NA
KEGG_NEUROTROPHIN_SIGNALING_PATHWAY	REACTOME_ORGANELLE_BIOGENESIS_AND_MAINTENANCE	rs59043558	5	150334662	CAMK2A	rs200502024	3	121820354	IQCB1	recessive_dominant	0.00554939	0.0199778	1.6651	0.273748	protective	NA
KEGG_NEUROTROPHIN_SIGNALING_PATHWAY	REACTOME_ORGANELLE_BIOGENESIS_AND_MAINTENANCE	rs2169633	15	66467291	MAP2K1	rs34782630	7	129593069	NRF1	dominant	0.145394	0.186459	1.66494	0.742293	protective	NA
KEGG_NEUROTROPHIN_SIGNALING_PATHWAY	REACTOME_ORGANELLE_BIOGENESIS_AND_MAINTENANCE	rs8142362	22	20979079	CRKL	rs11707509	3	196346629	TCTEX1D2	recessive_dominant	0.0665927	0.0965594	1.66229	0.667514	protective	NA
KEGG_NEUROTROPHIN_SIGNALING_PATHWAY	REACTOME_ORGANELLE_BIOGENESIS_AND_MAINTENANCE	rs2908290	7	44216137	CAMK2B	rs112830612	9	19007971	HAUS6	dominant	0.120977	0.159822	1.66108	0.723494	protective	NA
KEGG_NEUROTROPHIN_SIGNALING_PATHWAY	REACTOME_ORGANELLE_BIOGENESIS_AND_MAINTENANCE	rs4474932	2	47159123	CALM2	rs12761305	10	92814031	EXOC6	recessive_dominant	0.00110988	0.00554939	1.66061	0.199111	protective	NA
KEGG_NEUROTROPHIN_SIGNALING_PATHWAY	REACTOME_ORGANELLE_BIOGENESIS_AND_MAINTENANCE	rs55894401	16	81730962	PLCG2	rs11144552	9	78262765	CEP78	recessive_dominant	0.0155383	0.0332963	1.6597	0.458249	protective	NA
KEGG_NEUROTROPHIN_SIGNALING_PATHWAY	REACTOME_ORGANELLE_BIOGENESIS_AND_MAINTENANCE	rs8073151	17	1495834	CRK	rs4287754	2	61906147	CCT4	recessive_dominant	0.045505	0.0721421	1.65914	0.613166	protective	NA
KEGG_NEUROTROPHIN_SIGNALING_PATHWAY	REACTOME_ORGANELLE_BIOGENESIS_AND_MAINTENANCE	rs201635960	5	180199887	MAPK9	rs10402773	19	33004535	CEP89	dominant	0.390677	0.443951	1.65723	0.80306	protective	NA
KEGG_NEUROTROPHIN_SIGNALING_PATHWAY	REACTOME_ORGANELLE_BIOGENESIS_AND_MAINTENANCE	rs7805383	7	140908104	BRAF	rs2369963	3	132730101	NPHP3	recessive_dominant	0.0987791	0.133185	1.65505	0.713352	protective	NA
KEGG_NEUROTROPHIN_SIGNALING_PATHWAY	REACTOME_ORGANELLE_BIOGENESIS_AND_MAINTENANCE	rs147511193	3	119945039	GSK3B	rs1365962	2	218857832	PRKAG3	recessive_dominant	0	0.00776915	1.65503	0	protective	NA
KEGG_NEUROTROPHIN_SIGNALING_PATHWAY	REACTOME_ORGANELLE_BIOGENESIS_AND_MAINTENANCE	rs34137352	1	3694480	TP73	rs2489138	1	156526564	MEF2D	recessive_dominant	0.0277469	0.0488346	1.65384	0.555858	protective	0.004
KEGG_NEUROTROPHIN_SIGNALING_PATHWAY	REACTOME_ORGANELLE_BIOGENESIS_AND_MAINTENANCE	rs34137352	1	3694480	TP73	rs73916491	20	59046695	TUBB1	dominant	0.0133185	0.0299667	1.65311	0.436945	protective	NA
KEGG_NEUROTROPHIN_SIGNALING_PATHWAY	REACTOME_ORGANELLE_BIOGENESIS_AND_MAINTENANCE	rs7076160	10	48473929	MAPK8	rs7438356	4	15624770	CC2D2A	dominant	0.246393	0.291898	1.65186	0.793137	protective	NA
KEGG_NEUROTROPHIN_SIGNALING_PATHWAY	REACTOME_ORGANELLE_BIOGENESIS_AND_MAINTENANCE	rs2908290	7	44216137	CAMK2B	rs7214893	17	76140308	EXOC7	dominant	0.389567	0.440622	1.65121	0.810185	protective	NA
KEGG_NEUROTROPHIN_SIGNALING_PATHWAY	REACTOME_ORGANELLE_BIOGENESIS_AND_MAINTENANCE	rs10413331	19	58203728	ZNF274	rs12761305	10	92814031	EXOC6	recessive_dominant	0.0710322	0.105438	1.65093	0.648733	protective	NA
KEGG_NEUROTROPHIN_SIGNALING_PATHWAY	REACTOME_ORGANELLE_BIOGENESIS_AND_MAINTENANCE	rs529025836	17	63636272	MAP3K3	rs11896513	2	219219183	TUBA4A/TUBA4B	recessive_dominant	0.0144284	0.0344062	1.64975	0.410854	protective	NA
KEGG_NEUROTROPHIN_SIGNALING_PATHWAY	REACTOME_ORGANELLE_BIOGENESIS_AND_MAINTENANCE	rs2087072	1	243829549	AKT3	rs12359370	10	102181217	PPRC1	recessive_dominant	0.0521643	0.0799112	1.6485	0.633668	protective	NA
KEGG_NEUROTROPHIN_SIGNALING_PATHWAY	REACTOME_ORGANELLE_BIOGENESIS_AND_MAINTENANCE	rs7805383	7	140908104	BRAF	rs553512184	1	153989995	CRTC2	recessive_dominant	0.156493	0.197558	1.64558	0.75357	protective	NA
KEGG_NEUROTROPHIN_SIGNALING_PATHWAY	REACTOME_ORGANELLE_BIOGENESIS_AND_MAINTENANCE	rs10413331	19	58203728	ZNF274	rs12935211	16	58015332	CNGB1	recessive	0.0144284	0.0310766	1.64385	0.456443	protective	NA
KEGG_NEUROTROPHIN_SIGNALING_PATHWAY	REACTOME_ORGANELLE_BIOGENESIS_AND_MAINTENANCE	rs7805383	7	140908104	BRAF	rs6751305	2	61876220	CCT4	dominant	0.460599	0.510544	1.64064	0.818639	protective	NA
KEGG_NEUROTROPHIN_SIGNALING_PATHWAY	REACTOME_ORGANELLE_BIOGENESIS_AND_MAINTENANCE	rs13322072	3	179282730	PIK3CA	rs2790035	9	128439923	ODF2	dominant	0.418424	0.472808	1.64056	0.802221	protective	NA
KEGG_NEUROTROPHIN_SIGNALING_PATHWAY	REACTOME_ORGANELLE_BIOGENESIS_AND_MAINTENANCE	rs4877972	9	88989455	SHC3	rs2655172	8	70154581	NCOA2	recessive_dominant	0.105438	0.148724	1.63984	0.674651	protective	NA
KEGG_NEUROTROPHIN_SIGNALING_PATHWAY	REACTOME_ORGANELLE_BIOGENESIS_AND_MAINTENANCE	rs6072793	20	41185524	PLCG1	rs10883462	10	102095122	PPRC1	recessive_dominant	0.100999	0.138735	1.63917	0.697442	protective	NA
KEGG_NEUROTROPHIN_SIGNALING_PATHWAY	REACTOME_ORGANELLE_BIOGENESIS_AND_MAINTENANCE	rs62315570	4	86331750	MAPK10	rs7966731	12	96871649	NEDD1	recessive	0.0199778	0.0388457	1.63874	0.504384	protective	NA
KEGG_NEUROTROPHIN_SIGNALING_PATHWAY	REACTOME_ORGANELLE_BIOGENESIS_AND_MAINTENANCE	rs2224949	14	50096560	SOS2	rs71626264	3	177098521	TBL1XR1	recessive_dominant	0.0954495	0.130966	1.6385	0.700198	protective	NA
KEGG_NEUROTROPHIN_SIGNALING_PATHWAY	REACTOME_ORGANELLE_BIOGENESIS_AND_MAINTENANCE	rs12950747	17	8996860	PIK3R5	rs57156634	11	103446048	DYNC2H1	dominant	0.00887902	0.0233074	1.63807	0.375407	protective	NA
KEGG_NEUROTROPHIN_SIGNALING_PATHWAY	REACTOME_ORGANELLE_BIOGENESIS_AND_MAINTENANCE	rs62315570	4	86331750	MAPK10	rs4959880	6	442206	EXOC2	dominant	0.305216	0.355161	1.63718	0.797599	protective	NA
KEGG_NEUROTROPHIN_SIGNALING_PATHWAY	REACTOME_ORGANELLE_BIOGENESIS_AND_MAINTENANCE	rs13322072	3	179282730	PIK3CA	rs2388229	16	53556997	RPGRIP1L	dominant	0.426193	0.480577	1.63645	0.802784	protective	NA
KEGG_NEUROTROPHIN_SIGNALING_PATHWAY	REACTOME_ORGANELLE_BIOGENESIS_AND_MAINTENANCE	rs2224949	14	50096560	SOS2	rs2655172	8	70154581	NCOA2	recessive_dominant	0.0887902	0.129856	1.63541	0.652946	protective	NA
KEGG_NEUROTROPHIN_SIGNALING_PATHWAY	REACTOME_ORGANELLE_BIOGENESIS_AND_MAINTENANCE	rs2239798	6	36177857	MAPK13	rs2671332	11	103231440	DYNC2H1	recessive_dominant	0.0210877	0.0410655	1.63532	0.503034	protective	NA
KEGG_NEUROTROPHIN_SIGNALING_PATHWAY	REACTOME_ORGANELLE_BIOGENESIS_AND_MAINTENANCE	rs12986190	19	40273038	AKT2	rs7804751	7	151645370	PRKAG2	recessive_dominant	0.103219	0.137625	1.63344	0.721225	protective	NA
KEGG_NEUROTROPHIN_SIGNALING_PATHWAY	REACTOME_ORGANELLE_BIOGENESIS_AND_MAINTENANCE	rs9347129	6	166895934	RPS6KA2	rs896806	2	19961843	WDR35	recessive_dominant	0.017758	0.0355161	1.63339	0.49096	protective	NA
KEGG_NEUROTROPHIN_SIGNALING_PATHWAY	REACTOME_ORGANELLE_BIOGENESIS_AND_MAINTENANCE	rs4307417	9	89218258	SHC3	rs6432044	2	10041284	CYS1	recessive	0.0277469	0.054384	1.63194	0.496226	protective	NA
KEGG_NEUROTROPHIN_SIGNALING_PATHWAY	REACTOME_ORGANELLE_BIOGENESIS_AND_MAINTENANCE	rs629608	1	111738116	RAP1A	rs12933372	16	80566189	DYNLRB2	recessive_dominant	0.0233074	0.045505	1.6299	0.500554	protective	NA
KEGG_NEUROTROPHIN_SIGNALING_PATHWAY	REACTOME_ORGANELLE_BIOGENESIS_AND_MAINTENANCE	rs11102837	1	115346655	NGF	rs35407590	7	33271040	BBS9	recessive	0.0122087	0.0288568	1.62934	0.415946	protective	NA
KEGG_NEUROTROPHIN_SIGNALING_PATHWAY	REACTOME_ORGANELLE_BIOGENESIS_AND_MAINTENANCE	rs9759629	4	113743604	CAMK2D	rs37815	16	3455912	CLUAP1	dominant	0.172031	0.213097	1.62801	0.767252	protective	NA
KEGG_NEUROTROPHIN_SIGNALING_PATHWAY	REACTOME_ORGANELLE_BIOGENESIS_AND_MAINTENANCE	rs1018102	1	22041073	CDC42	rs10402773	19	33004535	CEP89	dominant	0.473918	0.527192	1.62783	0.807915	protective	NA
KEGG_NEUROTROPHIN_SIGNALING_PATHWAY	REACTOME_ORGANELLE_BIOGENESIS_AND_MAINTENANCE	rs557328	19	7902965	MAP2K7	rs5756349	22	37196680	SSTR3	dominant	0.329634	0.381798	1.62772	0.796189	protective	NA
KEGG_NEUROTROPHIN_SIGNALING_PATHWAY	REACTOME_ORGANELLE_BIOGENESIS_AND_MAINTENANCE	rs55702801	14	73255495	PSEN1	rs34487560	4	56029268	CEP135	dominant	0.165372	0.207547	1.62712	0.756528	protective	NA
KEGG_NEUROTROPHIN_SIGNALING_PATHWAY	REACTOME_ORGANELLE_BIOGENESIS_AND_MAINTENANCE	rs531967415	1	114764150	NRAS	rs34144731	4	55921913	CEP135/EXOC1	recessive_dominant	0.00776915	0.0221976	1.62648	0.344911	protective	NA
KEGG_NEUROTROPHIN_SIGNALING_PATHWAY	REACTOME_ORGANELLE_BIOGENESIS_AND_MAINTENANCE	rs55967668	5	68241438	PIK3R1	rs2388229	16	53556997	RPGRIP1L	recessive	0.00332963	0.0144284	1.62618	0.228199	protective	NA
KEGG_NEUROTROPHIN_SIGNALING_PATHWAY	REACTOME_ORGANELLE_BIOGENESIS_AND_MAINTENANCE	rs62315570	4	86331750	MAPK10	rs533119830	22	40656205	MCHR1	recessive_dominant	0.0610433	0.0899001	1.62556	0.658144	protective	NA
KEGG_NEUROTROPHIN_SIGNALING_PATHWAY	REACTOME_ORGANELLE_BIOGENESIS_AND_MAINTENANCE	rs3844536	19	396948	SHC2	rs62151837	2	73390396	ALMS1	dominant	0.320755	0.368479	1.62488	0.809321	protective	NA
KEGG_NEUROTROPHIN_SIGNALING_PATHWAY	REACTOME_ORGANELLE_BIOGENESIS_AND_MAINTENANCE	rs10413331	19	58203728	ZNF274	rs4936388	11	117440404	CEP164	recessive_dominant	0.0155383	0.0288568	1.62426	0.531177	protective	NA
KEGG_NEUROTROPHIN_SIGNALING_PATHWAY	REACTOME_ORGANELLE_BIOGENESIS_AND_MAINTENANCE	rs201635960	5	180199887	MAPK9	rs57574050	17	76091089	EXOC7	recessive_dominant	0.00443951	0.0133185	1.62422	0.33036	protective	NA
KEGG_NEUROTROPHIN_SIGNALING_PATHWAY	REACTOME_ORGANELLE_BIOGENESIS_AND_MAINTENANCE	rs201635960	5	180199887	MAPK9	rs277552	2	121632454	CLASP1	recessive_dominant	0.0621532	0.09101	1.62338	0.661914	protective	NA
KEGG_NEUROTROPHIN_SIGNALING_PATHWAY	REACTOME_ORGANELLE_BIOGENESIS_AND_MAINTENANCE	rs7482257	11	27755298	BDNF	rs10418927	19	16168734	RAB8A	recessive	0.0244173	0.0443951	1.6233	0.538737	protective	NA
KEGG_NEUROTROPHIN_SIGNALING_PATHWAY	REACTOME_ORGANELLE_BIOGENESIS_AND_MAINTENANCE	rs139443871	19	4165336	MAP2K2	rs113291905	19	14136613	PRKACA	recessive_dominant	0.0110988	0.0288568	1.62283	0.377709	protective	1.887e-04
KEGG_NEUROTROPHIN_SIGNALING_PATHWAY	REACTOME_ORGANELLE_BIOGENESIS_AND_MAINTENANCE	rs7805383	7	140908104	BRAF	rs12761305	10	92814031	EXOC6	recessive_dominant	0.124306	0.160932	1.62171	0.740108	protective	NA
KEGG_NEUROTROPHIN_SIGNALING_PATHWAY	REACTOME_ORGANELLE_BIOGENESIS_AND_MAINTENANCE	rs62315570	4	86331750	MAPK10	rs1396893	8	55779322	TGS1	recessive_dominant	0.0765816	0.107658	1.61965	0.687401	protective	NA
KEGG_NEUROTROPHIN_SIGNALING_PATHWAY	REACTOME_ORGANELLE_BIOGENESIS_AND_MAINTENANCE	rs2803965	14	73098014	PSEN1	rs17166570	5	132660439	KIF3A	dominant	0.0466149	0.0765816	1.6192	0.589563	protective	NA
KEGG_NEUROTROPHIN_SIGNALING_PATHWAY	REACTOME_ORGANELLE_BIOGENESIS_AND_MAINTENANCE	rs139443871	19	4165336	MAP2K2	rs2388229	16	53556997	RPGRIP1L	recessive	0.0432852	0.0699223	1.619	0.601812	protective	NA
KEGG_NEUROTROPHIN_SIGNALING_PATHWAY	REACTOME_ORGANELLE_BIOGENESIS_AND_MAINTENANCE	rs9759629	4	113743604	CAMK2D	rs533119830	22	40656205	MCHR1	dominant	0.334073	0.384018	1.61666	0.804697	protective	NA
KEGG_NEUROTROPHIN_SIGNALING_PATHWAY	REACTOME_ORGANELLE_BIOGENESIS_AND_MAINTENANCE	rs200089036	19	38902723	NFKBIB	rs533119830	22	40656205	MCHR1	recessive_dominant	0.100999	0.134295	1.61609	0.724212	protective	NA
KEGG_NEUROTROPHIN_SIGNALING_PATHWAY	REACTOME_ORGANELLE_BIOGENESIS_AND_MAINTENANCE	rs2908290	7	44216137	CAMK2B	rs4655200	1	20672101	KIF17	recessive_dominant	0.0488346	0.0776915	1.61546	0.609502	protective	NA
KEGG_NEUROTROPHIN_SIGNALING_PATHWAY	REACTOME_ORGANELLE_BIOGENESIS_AND_MAINTENANCE	rs6916254	6	136738115	MAP3K5	rs7247709	19	52240015	PPP2R1A	dominant	0.158713	0.201998	1.61375	0.745288	protective	NA
KEGG_NEUROTROPHIN_SIGNALING_PATHWAY	REACTOME_ORGANELLE_BIOGENESIS_AND_MAINTENANCE	rs12950747	17	8996860	PIK3R5	rs6751305	2	61876220	CCT4	recessive_dominant	0.0188679	0.0377358	1.61367	0.490385	protective	NA
KEGG_NEUROTROPHIN_SIGNALING_PATHWAY	REACTOME_ORGANELLE_BIOGENESIS_AND_MAINTENANCE	rs9759629	4	113743604	CAMK2D	rs9294982	6	169696898	TCTE3	recessive_dominant	0.145394	0.18424	1.61269	0.753286	protective	NA
KEGG_NEUROTROPHIN_SIGNALING_PATHWAY	REACTOME_ORGANELLE_BIOGENESIS_AND_MAINTENANCE	rs56002030	19	49073984	NTF4	rs12761305	10	92814031	EXOC6	dominant	0.478357	0.528302	1.61094	0.818769	protective	NA
KEGG_NEUROTROPHIN_SIGNALING_PATHWAY	REACTOME_ORGANELLE_BIOGENESIS_AND_MAINTENANCE	rs4877972	9	88989455	SHC3	rs7798741	7	33585000	BBS9	dominant	0.45616	0.512764	1.60962	0.797018	protective	NA
KEGG_NEUROTROPHIN_SIGNALING_PATHWAY	REACTOME_ORGANELLE_BIOGENESIS_AND_MAINTENANCE	rs1902716	10	48395086	MAPK8	rs11429505	8	70278596	NCOA2	recessive_dominant	0.0943396	0.128746	1.60941	0.704921	protective	NA
KEGG_NEUROTROPHIN_SIGNALING_PATHWAY	REACTOME_ORGANELLE_BIOGENESIS_AND_MAINTENANCE	rs12986190	19	40273038	AKT2	rs6961764	7	133131298	CHCHD3	recessive_dominant	0.0776915	0.108768	1.60939	0.690218	protective	NA
KEGG_NEUROTROPHIN_SIGNALING_PATHWAY	REACTOME_ORGANELLE_BIOGENESIS_AND_MAINTENANCE	rs2075076	7	44274642	CAMK2B	rs4655200	1	20672101	KIF17	dominant	0.231964	0.27636	1.60859	0.79084	protective	NA
KEGG_NEUROTROPHIN_SIGNALING_PATHWAY	REACTOME_ORGANELLE_BIOGENESIS_AND_MAINTENANCE	rs7076160	10	48473929	MAPK8	rs7943261	11	95767956	CEP57	dominant	0.106548	0.142064	1.60804	0.720186	protective	NA
KEGG_NEUROTROPHIN_SIGNALING_PATHWAY	REACTOME_ORGANELLE_BIOGENESIS_AND_MAINTENANCE	rs201635960	5	180199887	MAPK9	rs2369963	3	132730101	NPHP3	recessive_dominant	0.0788013	0.109878	1.60718	0.692978	protective	NA
KEGG_NEUROTROPHIN_SIGNALING_PATHWAY	REACTOME_ORGANELLE_BIOGENESIS_AND_MAINTENANCE	rs2075076	7	44274642	CAMK2B	rs11707509	3	196346629	TCTEX1D2	recessive_dominant	0.0621532	0.09101	1.60711	0.661914	protective	NA
KEGG_NEUROTROPHIN_SIGNALING_PATHWAY	REACTOME_ORGANELLE_BIOGENESIS_AND_MAINTENANCE	rs529025836	17	63636272	MAP3K3	rs4287754	2	61906147	CCT4	recessive_dominant	0.0110988	0.0188679	1.60657	0.583614	protective	NA
KEGG_NEUROTROPHIN_SIGNALING_PATHWAY	REACTOME_ORGANELLE_BIOGENESIS_AND_MAINTENANCE	rs10806852	6	166864334	RPS6KA2	rs3806410	1	156337134	CCT3	recessive_dominant	0.0144284	0.0310766	1.60594	0.456443	protective	NA
KEGG_NEUROTROPHIN_SIGNALING_PATHWAY	REACTOME_ORGANELLE_BIOGENESIS_AND_MAINTENANCE	rs62315570	4	86331750	MAPK10	rs4726122	7	151675463	PRKAG2	recessive_dominant	0.09101	0.126526	1.60582	0.691194	protective	NA
KEGG_NEUROTROPHIN_SIGNALING_PATHWAY	REACTOME_ORGANELLE_BIOGENESIS_AND_MAINTENANCE	rs4791329	17	7693455	TP53	rs1917460	11	103527656	DYNC2H1	recessive_dominant	0.0776915	0.108768	1.60425	0.690218	protective	NA
KEGG_NEUROTROPHIN_SIGNALING_PATHWAY	REACTOME_ORGANELLE_BIOGENESIS_AND_MAINTENANCE	rs1245510	10	73799959	CAMK2G	rs37815	16	3455912	CLUAP1	dominant	0.207547	0.250832	1.60386	0.782238	protective	NA
KEGG_NEUROTROPHIN_SIGNALING_PATHWAY	REACTOME_ORGANELLE_BIOGENESIS_AND_MAINTENANCE	rs10806852	6	166864334	RPS6KA2	rs55759073	19	619337	POLRMT	dominant	0.0421754	0.0665927	1.60338	0.617188	protective	NA
KEGG_NEUROTROPHIN_SIGNALING_PATHWAY	REACTOME_ORGANELLE_BIOGENESIS_AND_MAINTENANCE	rs7076160	10	48473929	MAPK8	rs6961764	7	133131298	CHCHD3	dominant	0.27636	0.321865	1.60286	0.804628	protective	NA
KEGG_NEUROTROPHIN_SIGNALING_PATHWAY	REACTOME_ORGANELLE_BIOGENESIS_AND_MAINTENANCE	rs2224949	14	50096560	SOS2	rs10883462	10	102095122	PPRC1	recessive_dominant	0.133185	0.170921	1.60233	0.745298	protective	NA
KEGG_NEUROTROPHIN_SIGNALING_PATHWAY	REACTOME_ORGANELLE_BIOGENESIS_AND_MAINTENANCE	rs17688145	5	56856967	MAP3K1	rs2655172	8	70154581	NCOA2	recessive_dominant	0.0310766	0.0610433	1.60189	0.493346	protective	NA
KEGG_NEUROTROPHIN_SIGNALING_PATHWAY	REACTOME_ORGANELLE_BIOGENESIS_AND_MAINTENANCE	rs2859240	1	172624233	FASLG	rs34144731	4	55921913	CEP135/EXOC1	recessive_dominant	0.00887902	0.0255272	1.60111	0.341984	protective	NA
KEGG_NEUROTROPHIN_SIGNALING_PATHWAY	REACTOME_ORGANELLE_BIOGENESIS_AND_MAINTENANCE	rs55894401	16	81730962	PLCG2	rs2388229	16	53556997	RPGRIP1L	recessive	0.0188679	0.0377358	1.5999	0.490385	protective	2.827e-04
KEGG_NEUROTROPHIN_SIGNALING_PATHWAY	REACTOME_ORGANELLE_BIOGENESIS_AND_MAINTENANCE	rs13322072	3	179282730	PIK3CA	rs201143490	9	136452021	INPP5E	dominant	0.286349	0.337403	1.59986	0.78797	protective	NA
KEGG_NEUROTROPHIN_SIGNALING_PATHWAY	REACTOME_ORGANELLE_BIOGENESIS_AND_MAINTENANCE	rs2517	9	130855035	ABL1	rs113291905	19	14136613	PRKACA	dominant	0.0321865	0.054384	1.59835	0.578262	protective	NA
KEGG_NEUROTROPHIN_SIGNALING_PATHWAY	REACTOME_ORGANELLE_BIOGENESIS_AND_MAINTENANCE	rs2908290	7	44216137	CAMK2B	rs62151837	2	73390396	ALMS1	dominant	0.376249	0.426193	1.59803	0.812125	protective	NA
KEGG_NEUROTROPHIN_SIGNALING_PATHWAY	REACTOME_ORGANELLE_BIOGENESIS_AND_MAINTENANCE	rs2087072	1	243829549	AKT3	rs6961764	7	133131298	CHCHD3	recessive	0.0377358	0.0621532	1.59802	0.591737	protective	NA
KEGG_NEUROTROPHIN_SIGNALING_PATHWAY	REACTOME_ORGANELLE_BIOGENESIS_AND_MAINTENANCE	rs62315570	4	86331750	MAPK10	rs7247709	19	52240015	PPP2R1A	dominant	0.401776	0.45394	1.5979	0.807907	protective	NA
KEGG_NEUROTROPHIN_SIGNALING_PATHWAY	REACTOME_ORGANELLE_BIOGENESIS_AND_MAINTENANCE	rs62315570	4	86331750	MAPK10	rs2130923	4	23781504	PPARGC1A	dominant	0.207547	0.249723	1.59788	0.786878	protective	0.003
KEGG_NEUROTROPHIN_SIGNALING_PATHWAY	REACTOME_ORGANELLE_BIOGENESIS_AND_MAINTENANCE	rs34137352	1	3694480	TP73	rs9975804	21	29058105	CCT8	recessive_dominant	0.00665927	0.0199778	1.59741	0.328864	protective	NA
KEGG_NEUROTROPHIN_SIGNALING_PATHWAY	REACTOME_ORGANELLE_BIOGENESIS_AND_MAINTENANCE	rs2803965	14	73098014	PSEN1	rs4761574	12	94503883	CEP83	dominant	0.36515	0.415094	1.59691	0.810474	protective	NA
KEGG_NEUROTROPHIN_SIGNALING_PATHWAY	REACTOME_ORGANELLE_BIOGENESIS_AND_MAINTENANCE	rs8078982	17	49485912	NGFR	rs11419917	22	31576509	SFI1	recessive	0.0099889	0.0244173	1.59645	0.403129	protective	NA
KEGG_NEUROTROPHIN_SIGNALING_PATHWAY	REACTOME_ORGANELLE_BIOGENESIS_AND_MAINTENANCE	rs4877972	9	88989455	SHC3	rs34782630	7	129593069	NRF1	dominant	0.170921	0.211987	1.59555	0.766346	protective	NA
KEGG_NEUROTROPHIN_SIGNALING_PATHWAY	REACTOME_ORGANELLE_BIOGENESIS_AND_MAINTENANCE	rs139443871	19	4165336	MAP2K2	rs1556034	1	6689319	DNAJC11	recessive_dominant	0.102109	0.137625	1.59535	0.712588	protective	NA
KEGG_NEUROTROPHIN_SIGNALING_PATHWAY	REACTOME_ORGANELLE_BIOGENESIS_AND_MAINTENANCE	rs12986190	19	40273038	AKT2	rs2655172	8	70154581	NCOA2	dominant	0.253052	0.298557	1.5948	0.795948	protective	NA
KEGG_NEUROTROPHIN_SIGNALING_PATHWAY	REACTOME_ORGANELLE_BIOGENESIS_AND_MAINTENANCE	rs2239798	6	36177857	MAPK13	rs34487560	4	56029268	CEP135	recessive	0.00332963	0.0144284	1.5941	0.228199	protective	NA
KEGG_NEUROTROPHIN_SIGNALING_PATHWAY	REACTOME_ORGANELLE_BIOGENESIS_AND_MAINTENANCE	rs200089036	19	38902723	NFKBIB	rs71626264	3	177098521	TBL1XR1	recessive_dominant	0.104329	0.139845	1.59288	0.716449	protective	NA
KEGG_NEUROTROPHIN_SIGNALING_PATHWAY	REACTOME_ORGANELLE_BIOGENESIS_AND_MAINTENANCE	rs531967415	1	114764150	NRAS	rs73054883	19	52207932	PPP2R1A	recessive_dominant	0.00443951	0.0166482	1.59209	0.263397	protective	NA
KEGG_NEUROTROPHIN_SIGNALING_PATHWAY	REACTOME_ORGANELLE_BIOGENESIS_AND_MAINTENANCE	rs62044000	16	81927776	PLCG2	rs6593798	1	147135704	PRKAB2	recessive_dominant	0	0.00776915	1.59207	0	protective	NA
KEGG_NEUROTROPHIN_SIGNALING_PATHWAY	REACTOME_ORGANELLE_BIOGENESIS_AND_MAINTENANCE	rs4474932	2	47159123	CALM2	rs6593798	1	147135704	PRKAB2	recessive_dominant	0	0.00776915	1.59207	0	protective	NA
KEGG_NEUROTROPHIN_SIGNALING_PATHWAY	REACTOME_ORGANELLE_BIOGENESIS_AND_MAINTENANCE	rs139443871	19	4165336	MAP2K2	rs9294982	6	169696898	TCTE3	recessive_dominant	0.106548	0.140954	1.59187	0.726796	protective	NA
KEGG_NEUROTROPHIN_SIGNALING_PATHWAY	REACTOME_ORGANELLE_BIOGENESIS_AND_MAINTENANCE	rs201635960	5	180199887	MAPK9	rs10460000	18	12320551	TUBB6	recessive_dominant	0.0643729	0.0932297	1.59104	0.66918	protective	NA
KEGG_NEUROTROPHIN_SIGNALING_PATHWAY	REACTOME_ORGANELLE_BIOGENESIS_AND_MAINTENANCE	rs998521	15	66407072	MAP2K1	rs73886521	22	46273829	PPARA	dominant	0.0599334	0.0965594	1.59052	0.596507	protective	NA
KEGG_NEUROTROPHIN_SIGNALING_PATHWAY	REACTOME_ORGANELLE_BIOGENESIS_AND_MAINTENANCE	rs11862662	16	81975892	PLCG2	rs17166570	5	132660439	KIF3A	dominant	0.036626	0.0643729	1.58866	0.552578	protective	NA
KEGG_NEUROTROPHIN_SIGNALING_PATHWAY	REACTOME_ORGANELLE_BIOGENESIS_AND_MAINTENANCE	rs3844536	19	396948	SHC2	rs17166570	5	132660439	KIF3A	dominant	0.0477248	0.0776915	1.58722	0.594955	protective	NA
KEGG_NEUROTROPHIN_SIGNALING_PATHWAY	REACTOME_ORGANELLE_BIOGENESIS_AND_MAINTENANCE	rs55894401	16	81730962	PLCG2	rs1396893	8	55779322	TGS1	recessive	0.0110988	0.0266371	1.58588	0.41012	protective	NA
KEGG_NEUROTROPHIN_SIGNALING_PATHWAY	REACTOME_ORGANELLE_BIOGENESIS_AND_MAINTENANCE	rs13322072	3	179282730	PIK3CA	rs7214893	17	76140308	EXOC7	dominant	0.331853	0.384018	1.58557	0.796694	protective	NA
KEGG_NEUROTROPHIN_SIGNALING_PATHWAY	REACTOME_ORGANELLE_BIOGENESIS_AND_MAINTENANCE	rs4144887	6	166747512	RPS6KA2	rs28716841	5	132733467	KIF3A	dominant	0.0432852	0.0688124	1.58517	0.612248	protective	NA
KEGG_NEUROTROPHIN_SIGNALING_PATHWAY	REACTOME_ORGANELLE_BIOGENESIS_AND_MAINTENANCE	rs759228	22	20998186	CRKL	rs746884	20	59067268	TUBB1	recessive_dominant	0.00332963	0.00776915	1.58445	0.426662	protective	NA
KEGG_NEUROTROPHIN_SIGNALING_PATHWAY	REACTOME_ORGANELLE_BIOGENESIS_AND_MAINTENANCE	rs2612043	12	66183500	IRAK3	rs28588283	4	55820993	EXOC1	recessive_dominant	0.0299667	0.0510544	1.58407	0.574197	protective	NA
KEGG_NEUROTROPHIN_SIGNALING_PATHWAY	REACTOME_ORGANELLE_BIOGENESIS_AND_MAINTENANCE	rs55967668	5	68241438	PIK3R1	rs12302358	12	110239437	IFT81	recessive_dominant	0.00665927	0.0210877	1.58365	0.311203	protective	NA
KEGG_NEUROTROPHIN_SIGNALING_PATHWAY	REACTOME_ORGANELLE_BIOGENESIS_AND_MAINTENANCE	rs557328	19	7902965	MAP2K7	rs2072826	6	135253558	AHI1	dominant	0.201998	0.248613	1.58282	0.765038	protective	NA
KEGG_NEUROTROPHIN_SIGNALING_PATHWAY	REACTOME_ORGANELLE_BIOGENESIS_AND_MAINTENANCE	rs12986190	19	40273038	AKT2	rs4936388	11	117440404	CEP164	dominant	0.136515	0.176471	1.582	0.737789	protective	NA
KEGG_NEUROTROPHIN_SIGNALING_PATHWAY	REACTOME_ORGANELLE_BIOGENESIS_AND_MAINTENANCE	rs7076160	10	48473929	MAPK8	rs2105847	4	2271113	HAUS3	dominant	0.221976	0.27081	1.58075	0.768223	protective	NA
KEGG_NEUROTROPHIN_SIGNALING_PATHWAY	REACTOME_ORGANELLE_BIOGENESIS_AND_MAINTENANCE	rs2224949	14	50096560	SOS2	rs73094828	20	32316895	KIF3B	dominant	0.128746	0.165372	1.58067	0.745796	protective	NA
KEGG_NEUROTROPHIN_SIGNALING_PATHWAY	REACTOME_ORGANELLE_BIOGENESIS_AND_MAINTENANCE	rs8073151	17	1495834	CRK	rs6593798	1	147135704	PRKAB2	recessive_dominant	0.0410655	0.054384	1.57849	0.744615	protective	NA
KEGG_NEUROTROPHIN_SIGNALING_PATHWAY	REACTOME_ORGANELLE_BIOGENESIS_AND_MAINTENANCE	rs2224949	14	50096560	SOS2	rs6432044	2	10041284	CYS1	recessive_dominant	0.104329	0.143174	1.57844	0.697079	protective	NA
KEGG_NEUROTROPHIN_SIGNALING_PATHWAY	REACTOME_ORGANELLE_BIOGENESIS_AND_MAINTENANCE	rs325923	1	111691513	RAP1A	rs2072826	6	135253558	AHI1	recessive_dominant	0.0443951	0.0688124	1.57831	0.628676	protective	NA
KEGG_NEUROTROPHIN_SIGNALING_PATHWAY	REACTOME_ORGANELLE_BIOGENESIS_AND_MAINTENANCE	rs2224949	14	50096560	SOS2	rs17166570	5	132660439	KIF3A	dominant	0.054384	0.0854606	1.578	0.61545	protective	NA
KEGG_NEUROTROPHIN_SIGNALING_PATHWAY	REACTOME_ORGANELLE_BIOGENESIS_AND_MAINTENANCE	rs1245510	10	73799959	CAMK2G	rs28716841	5	132733467	KIF3A	recessive_dominant	0.0188679	0.0388457	1.57776	0.475824	protective	NA
KEGG_NEUROTROPHIN_SIGNALING_PATHWAY	REACTOME_ORGANELLE_BIOGENESIS_AND_MAINTENANCE	rs7033070	9	131586374	RAPGEF1	rs4821542	22	37252918	SSTR3	recessive_dominant	0.0233074	0.0421754	1.57704	0.541956	protective	NA
KEGG_NEUROTROPHIN_SIGNALING_PATHWAY	REACTOME_ORGANELLE_BIOGENESIS_AND_MAINTENANCE	rs66508783	19	18115826	PIK3R2	rs200502024	3	121820354	IQCB1	recessive_dominant	0.0110988	0.0288568	1.57507	0.377709	protective	NA
KEGG_NEUROTROPHIN_SIGNALING_PATHWAY	REACTOME_ORGANELLE_BIOGENESIS_AND_MAINTENANCE	rs2224949	14	50096560	SOS2	rs2369963	3	132730101	NPHP3	recessive_dominant	0.0943396	0.126526	1.57327	0.719115	protective	NA
KEGG_NEUROTROPHIN_SIGNALING_PATHWAY	REACTOME_ORGANELLE_BIOGENESIS_AND_MAINTENANCE	rs1245510	10	73799959	CAMK2G	rs34782630	7	129593069	NRF1	recessive_dominant	0.0532741	0.0799112	1.57292	0.647909	protective	NA
KEGG_NEUROTROPHIN_SIGNALING_PATHWAY	REACTOME_ORGANELLE_BIOGENESIS_AND_MAINTENANCE	rs13322072	3	179282730	PIK3CA	rs2105847	4	2271113	HAUS3	dominant	0.340733	0.392897	1.57162	0.798612	protective	NA
KEGG_NEUROTROPHIN_SIGNALING_PATHWAY	REACTOME_ORGANELLE_BIOGENESIS_AND_MAINTENANCE	rs2087072	1	243829549	AKT3	rs6751305	2	61876220	CCT4	recessive	0.0388457	0.063263	1.57068	0.598436	protective	NA
KEGG_NEUROTROPHIN_SIGNALING_PATHWAY	REACTOME_ORGANELLE_BIOGENESIS_AND_MAINTENANCE	rs66508783	19	18115826	PIK3R2	rs57574050	17	76091089	EXOC7	recessive_dominant	0.00665927	0.0144284	1.56873	0.457929	protective	NA
KEGG_NEUROTROPHIN_SIGNALING_PATHWAY	REACTOME_ORGANELLE_BIOGENESIS_AND_MAINTENANCE	rs200089036	19	38902723	NFKBIB	rs11287280	3	45836823	LZTFL1	recessive_dominant	0.0133185	0.0299667	1.56842	0.436945	protective	NA
KEGG_NEUROTROPHIN_SIGNALING_PATHWAY	REACTOME_ORGANELLE_BIOGENESIS_AND_MAINTENANCE	rs998521	15	66407072	MAP2K1	rs10402773	19	33004535	CEP89	dominant	0.233074	0.286349	1.56826	0.757413	protective	NA
KEGG_NEUROTROPHIN_SIGNALING_PATHWAY	REACTOME_ORGANELLE_BIOGENESIS_AND_MAINTENANCE	rs200089036	19	38902723	NFKBIB	rs12761305	10	92814031	EXOC6	recessive_dominant	0.110988	0.146504	1.56822	0.727311	protective	NA
KEGG_NEUROTROPHIN_SIGNALING_PATHWAY	REACTOME_ORGANELLE_BIOGENESIS_AND_MAINTENANCE	rs201635960	5	180199887	MAPK9	rs34144731	4	55921913	CEP135/EXOC1	recessive_dominant	0.00554939	0.0188679	1.56806	0.290179	protective	NA
KEGG_NEUROTROPHIN_SIGNALING_PATHWAY	REACTOME_ORGANELLE_BIOGENESIS_AND_MAINTENANCE	rs4791329	17	7693455	TP53	rs10418927	19	16168734	RAB8A	recessive	0.0266371	0.0488346	1.56723	0.533015	protective	NA
KEGG_NEUROTROPHIN_SIGNALING_PATHWAY	REACTOME_ORGANELLE_BIOGENESIS_AND_MAINTENANCE	rs2239798	6	36177857	MAPK13	rs2655172	8	70154581	NCOA2	dominant	0.215316	0.258602	1.56691	0.786689	protective	NA
KEGG_NEUROTROPHIN_SIGNALING_PATHWAY	REACTOME_ORGANELLE_BIOGENESIS_AND_MAINTENANCE	rs3844536	19	396948	SHC2	rs11287280	3	45836823	LZTFL1	recessive_dominant	0.0144284	0.0321865	1.56447	0.440199	protective	NA
KEGG_NEUROTROPHIN_SIGNALING_PATHWAY	REACTOME_ORGANELLE_BIOGENESIS_AND_MAINTENANCE	rs55702801	14	73255495	PSEN1	rs2018797	7	129210004	SMO	dominant	0.17869	0.220866	1.5643	0.7675	protective	NA
KEGG_NEUROTROPHIN_SIGNALING_PATHWAY	REACTOME_ORGANELLE_BIOGENESIS_AND_MAINTENANCE	rs9947044	18	63263494	BCL2	rs73054883	19	52207932	PPP2R1A	recessive_dominant	0.00110988	0.0099889	1.56336	0.110123	protective	NA
KEGG_NEUROTROPHIN_SIGNALING_PATHWAY	REACTOME_ORGANELLE_BIOGENESIS_AND_MAINTENANCE	rs10413331	19	58203728	ZNF274	rs4917904	10	102447292	ACTR1A	recessive_dominant	0.0244173	0.045505	1.56221	0.524987	protective	NA
KEGG_NEUROTROPHIN_SIGNALING_PATHWAY	REACTOME_ORGANELLE_BIOGENESIS_AND_MAINTENANCE	rs4877972	9	88989455	SHC3	rs10883462	10	102095122	PPRC1	dominant	0.427303	0.487236	1.56061	0.785215	protective	NA
KEGG_NEUROTROPHIN_SIGNALING_PATHWAY	REACTOME_ORGANELLE_BIOGENESIS_AND_MAINTENANCE	rs1245510	10	73799959	CAMK2G	rs7783031	7	151590143	PRKAG2	recessive_dominant	0.0976693	0.132075	1.5599	0.711299	protective	NA
KEGG_NEUROTROPHIN_SIGNALING_PATHWAY	REACTOME_ORGANELLE_BIOGENESIS_AND_MAINTENANCE	rs2169633	15	66467291	MAP2K1	rs2018797	7	129210004	SMO	recessive	0.0332963	0.0554939	1.55962	0.586223	protective	NA
KEGG_NEUROTROPHIN_SIGNALING_PATHWAY	REACTOME_ORGANELLE_BIOGENESIS_AND_MAINTENANCE	rs998521	15	66407072	MAP2K1	rs9294982	6	169696898	TCTE3	dominant	0.199778	0.250832	1.55942	0.745646	protective	NA
KEGG_NEUROTROPHIN_SIGNALING_PATHWAY	REACTOME_ORGANELLE_BIOGENESIS_AND_MAINTENANCE	rs325923	1	111691513	RAP1A	rs2489138	1	156526564	MEF2D	dominant	0.407325	0.461709	1.55914	0.80126	protective	0.003
KEGG_NEUROTROPHIN_SIGNALING_PATHWAY	REACTOME_ORGANELLE_BIOGENESIS_AND_MAINTENANCE	rs12070845	1	109261850	SORT1	rs2311600	2	121340676	CLASP1	recessive_dominant	0	0.00665927	1.55866	0	protective	NA
KEGG_NEUROTROPHIN_SIGNALING_PATHWAY	REACTOME_ORGANELLE_BIOGENESIS_AND_MAINTENANCE	rs2803965	14	73098014	PSEN1	rs2790035	9	128439923	ODF2	dominant	0.341842	0.389567	1.55776	0.813864	protective	NA
KEGG_NEUROTROPHIN_SIGNALING_PATHWAY	REACTOME_ORGANELLE_BIOGENESIS_AND_MAINTENANCE	rs7805383	7	140908104	BRAF	rs11668155	19	52247306	PPP2R1A	dominant	0.291898	0.339623	1.55765	0.80155	protective	NA
KEGG_NEUROTROPHIN_SIGNALING_PATHWAY	REACTOME_ORGANELLE_BIOGENESIS_AND_MAINTENANCE	rs9759629	4	113743604	CAMK2D	rs201143490	9	136452021	INPP5E	dominant	0.27525	0.320755	1.55733	0.804252	protective	NA
KEGG_NEUROTROPHIN_SIGNALING_PATHWAY	REACTOME_ORGANELLE_BIOGENESIS_AND_MAINTENANCE	rs10413331	19	58203728	ZNF274	rs2847251	18	12751036	CEP76	recessive	0.00110988	0.0122087	1.55712	0.089899	protective	NA
KEGG_NEUROTROPHIN_SIGNALING_PATHWAY	REACTOME_ORGANELLE_BIOGENESIS_AND_MAINTENANCE	rs557328	19	7902965	MAP2K7	rs12359370	10	102181217	PPRC1	dominant	0.142064	0.18424	1.55537	0.733179	protective	NA
KEGG_NEUROTROPHIN_SIGNALING_PATHWAY	REACTOME_ORGANELLE_BIOGENESIS_AND_MAINTENANCE	rs7033070	9	131586374	RAPGEF1	rs2072826	6	135253558	AHI1	recessive_dominant	0.0377358	0.0599334	1.55382	0.615105	protective	NA
KEGG_NEUROTROPHIN_SIGNALING_PATHWAY	REACTOME_ORGANELLE_BIOGENESIS_AND_MAINTENANCE	rs55894401	16	81730962	PLCG2	rs4917904	10	102447292	ACTR1A	recessive_dominant	0.036626	0.0588235	1.55324	0.608295	protective	NA
KEGG_NEUROTROPHIN_SIGNALING_PATHWAY	REACTOME_ORGANELLE_BIOGENESIS_AND_MAINTENANCE	rs11862662	16	81975892	PLCG2	rs533119830	22	40656205	MCHR1	recessive_dominant	0.0443951	0.0710322	1.55297	0.607578	protective	NA
KEGG_NEUROTROPHIN_SIGNALING_PATHWAY	REACTOME_ORGANELLE_BIOGENESIS_AND_MAINTENANCE	rs12425324	12	111407697	SH2B3	rs6855480	4	23747576	PPARGC1A	recessive_dominant	0.0521643	0.0776915	1.5521	0.653346	protective	NA
KEGG_NEUROTROPHIN_SIGNALING_PATHWAY	REACTOME_ORGANELLE_BIOGENESIS_AND_MAINTENANCE	rs2908290	7	44216137	CAMK2B	rs71421442	14	57152633	EXOC5	recessive	0.00887902	0.0244173	1.55098	0.357935	protective	NA
KEGG_NEUROTROPHIN_SIGNALING_PATHWAY	REACTOME_ORGANELLE_BIOGENESIS_AND_MAINTENANCE	rs2075076	7	44274642	CAMK2B	rs2369963	3	132730101	NPHP3	recessive	0.0133185	0.0310766	1.55031	0.420858	protective	NA
KEGG_NEUROTROPHIN_SIGNALING_PATHWAY	REACTOME_ORGANELLE_BIOGENESIS_AND_MAINTENANCE	rs1902716	10	48395086	MAPK8	rs2130923	4	23781504	PPARGC1A	dominant	0.150943	0.189789	1.55005	0.758934	protective	NA
KEGG_NEUROTROPHIN_SIGNALING_PATHWAY	REACTOME_ORGANELLE_BIOGENESIS_AND_MAINTENANCE	rs1018102	1	22041073	CDC42	rs11707509	3	196346629	TCTEX1D2	recessive_dominant	0.0943396	0.127636	1.5497	0.711957	protective	NA
KEGG_NEUROTROPHIN_SIGNALING_PATHWAY	REACTOME_ORGANELLE_BIOGENESIS_AND_MAINTENANCE	rs1902716	10	48395086	MAPK8	rs7562959	2	121577641	CLASP1	recessive_dominant	0	0.00887902	1.54863	0	protective	NA
KEGG_NEUROTROPHIN_SIGNALING_PATHWAY	REACTOME_ORGANELLE_BIOGENESIS_AND_MAINTENANCE	rs998521	15	66407072	MAP2K1	rs16996724	22	36772774	IFT27	dominant	0.0310766	0.0610433	1.54675	0.493346	protective	NA
KEGG_NEUROTROPHIN_SIGNALING_PATHWAY	REACTOME_ORGANELLE_BIOGENESIS_AND_MAINTENANCE	rs55702801	14	73255495	PSEN1	rs2072826	6	135253558	AHI1	dominant	0.118757	0.156493	1.54555	0.72637	protective	NA
KEGG_NEUROTROPHIN_SIGNALING_PATHWAY	REACTOME_ORGANELLE_BIOGENESIS_AND_MAINTENANCE	rs9347129	6	166895934	RPS6KA2	rs10883462	10	102095122	PPRC1	recessive_dominant	0.0199778	0.0377358	1.54495	0.519819	protective	NA
KEGG_NEUROTROPHIN_SIGNALING_PATHWAY	REACTOME_ORGANELLE_BIOGENESIS_AND_MAINTENANCE	rs6094276	20	44949946	YWHAB	rs28588283	4	55820993	EXOC1	recessive_dominant	0.0788013	0.110988	1.54475	0.685193	protective	NA
KEGG_NEUROTROPHIN_SIGNALING_PATHWAY	REACTOME_ORGANELLE_BIOGENESIS_AND_MAINTENANCE	rs10806852	6	166864334	RPS6KA2	rs73916491	20	59046695	TUBB1	recessive_dominant	0	0.00776915	1.54404	0	protective	NA
KEGG_NEUROTROPHIN_SIGNALING_PATHWAY	REACTOME_ORGANELLE_BIOGENESIS_AND_MAINTENANCE	rs10413331	19	58203728	ZNF274	rs2072826	6	135253558	AHI1	recessive	0.00443951	0.0166482	1.53795	0.263397	protective	NA
KEGG_NEUROTROPHIN_SIGNALING_PATHWAY	REACTOME_ORGANELLE_BIOGENESIS_AND_MAINTENANCE	rs201635960	5	180199887	MAPK9	rs2072826	6	135253558	AHI1	dominant	0.239734	0.283019	1.53638	0.798832	protective	NA
KEGG_NEUROTROPHIN_SIGNALING_PATHWAY	REACTOME_ORGANELLE_BIOGENESIS_AND_MAINTENANCE	rs55702801	14	73255495	PSEN1	rs9409189	9	120382927	CDK5RAP2	dominant	0.158713	0.203108	1.53629	0.740185	protective	NA
KEGG_NEUROTROPHIN_SIGNALING_PATHWAY	REACTOME_ORGANELLE_BIOGENESIS_AND_MAINTENANCE	rs3844536	19	396948	SHC2	rs6751305	2	61876220	CCT4	dominant	0.408435	0.45616	1.53561	0.823142	protective	NA
KEGG_NEUROTROPHIN_SIGNALING_PATHWAY	REACTOME_ORGANELLE_BIOGENESIS_AND_MAINTENANCE	rs2908290	7	44216137	CAMK2B	rs55924499	7	151517706	PRKAG2	dominant	0.376249	0.425083	1.53495	0.81582	protective	0.001
KEGG_NEUROTROPHIN_SIGNALING_PATHWAY	REACTOME_ORGANELLE_BIOGENESIS_AND_MAINTENANCE	rs139443871	19	4165336	MAP2K2	rs7129263	11	248077	SIRT3	recessive_dominant	0.0677026	0.0976693	1.53479	0.670901	protective	NA
KEGG_NEUROTROPHIN_SIGNALING_PATHWAY	REACTOME_ORGANELLE_BIOGENESIS_AND_MAINTENANCE	rs139443871	19	4165336	MAP2K2	rs57156634	11	103446048	DYNC2H1	recessive_dominant	0.00110988	0.00443951	1.5345	0.249167	protective	NA
KEGG_NEUROTROPHIN_SIGNALING_PATHWAY	REACTOME_ORGANELLE_BIOGENESIS_AND_MAINTENANCE	rs56002030	19	49073984	NTF4	rs6534321	4	122692023	BBS12	dominant	0.249723	0.294118	1.53371	0.798817	protective	NA
KEGG_NEUROTROPHIN_SIGNALING_PATHWAY	REACTOME_ORGANELLE_BIOGENESIS_AND_MAINTENANCE	rs2087072	1	243829549	AKT3	rs5756349	22	37196680	SSTR3	recessive	0.0299667	0.0521643	1.53323	0.561322	protective	NA
KEGG_NEUROTROPHIN_SIGNALING_PATHWAY	REACTOME_ORGANELLE_BIOGENESIS_AND_MAINTENANCE	rs2517	9	130855035	ABL1	rs10421830	19	45210634	MARK4	recessive_dominant	0.0144284	0.0310766	1.53317	0.456443	protective	NA
KEGG_NEUROTROPHIN_SIGNALING_PATHWAY	REACTOME_ORGANELLE_BIOGENESIS_AND_MAINTENANCE	rs55702801	14	73255495	PSEN1	rs746884	20	59067268	TUBB1	dominant	0.148724	0.188679	1.53262	0.751239	protective	NA
KEGG_NEUROTROPHIN_SIGNALING_PATHWAY	REACTOME_ORGANELLE_BIOGENESIS_AND_MAINTENANCE	rs1007802	1	206735691	MAPKAPK2	rs71626264	3	177098521	TBL1XR1	dominant	0.420644	0.473918	1.5314	0.805971	protective	NA
KEGG_NEUROTROPHIN_SIGNALING_PATHWAY	REACTOME_ORGANELLE_BIOGENESIS_AND_MAINTENANCE	rs2537850	14	90970875	RPS6KA5	rs113582339	7	151529654	PRKAG2	recessive_dominant	0.017758	0.0355161	1.53132	0.49096	protective	NA
KEGG_NEUROTROPHIN_SIGNALING_PATHWAY	REACTOME_ORGANELLE_BIOGENESIS_AND_MAINTENANCE	rs2239798	6	36177857	MAPK13	rs10779788	1	5945990	NPHP4	dominant	0.196448	0.237514	1.53003	0.784834	protective	NA
KEGG_NEUROTROPHIN_SIGNALING_PATHWAY	REACTOME_ORGANELLE_BIOGENESIS_AND_MAINTENANCE	rs2908290	7	44216137	CAMK2B	rs36222127	17	75876781	FBF1	dominant	0.322974	0.370699	1.52991	0.809841	protective	NA
KEGG_NEUROTROPHIN_SIGNALING_PATHWAY	REACTOME_ORGANELLE_BIOGENESIS_AND_MAINTENANCE	rs557328	19	7902965	MAP2K7	rs612700	11	74127339	C2CD3	dominant	0.298557	0.348502	1.52934	0.79569	protective	NA
KEGG_NEUROTROPHIN_SIGNALING_PATHWAY	REACTOME_ORGANELLE_BIOGENESIS_AND_MAINTENANCE	rs557328	19	7902965	MAP2K7	rs746884	20	59067268	TUBB1	dominant	0.299667	0.349612	1.52702	0.796015	protective	NA
KEGG_NEUROTROPHIN_SIGNALING_PATHWAY	REACTOME_ORGANELLE_BIOGENESIS_AND_MAINTENANCE	rs7076160	10	48473929	MAPK8	rs4726122	7	151675463	PRKAG2	dominant	0.246393	0.289678	1.52643	0.80172	protective	NA
KEGG_NEUROTROPHIN_SIGNALING_PATHWAY	REACTOME_ORGANELLE_BIOGENESIS_AND_MAINTENANCE	rs11862662	16	81975892	PLCG2	rs113230548	2	231791498	PDE6D	recessive_dominant	0.00221976	0.0122087	1.5263	0.179998	protective	NA
KEGG_NEUROTROPHIN_SIGNALING_PATHWAY	REACTOME_ORGANELLE_BIOGENESIS_AND_MAINTENANCE	rs12070845	1	109261850	SORT1	rs11707509	3	196346629	TCTEX1D2	recessive_dominant	0	0.00665927	1.52549	0	protective	NA
KEGG_NEUROTROPHIN_SIGNALING_PATHWAY	REACTOME_ORGANELLE_BIOGENESIS_AND_MAINTENANCE	rs2087072	1	243829549	AKT3	rs11168720	12	49146750	TUBA1A/TUBA1B	recessive_dominant	0.099889	0.132075	1.52439	0.729258	protective	NA
KEGG_NEUROTROPHIN_SIGNALING_PATHWAY	REACTOME_ORGANELLE_BIOGENESIS_AND_MAINTENANCE	rs1018102	1	22041073	CDC42	rs6593798	1	147135704	PRKAB2	recessive_dominant	0.0288568	0.0499445	1.52431	0.565232	protective	0.005
KEGG_NEUROTROPHIN_SIGNALING_PATHWAY	REACTOME_ORGANELLE_BIOGENESIS_AND_MAINTENANCE	rs2087072	1	243829549	AKT3	rs4273371	3	108119071	IFT57	recessive_dominant	0.122087	0.162042	1.52404	0.719135	protective	NA
KEGG_NEUROTROPHIN_SIGNALING_PATHWAY	REACTOME_ORGANELLE_BIOGENESIS_AND_MAINTENANCE	rs1902716	10	48395086	MAPK8	rs7804751	7	151645370	PRKAG2	recessive_dominant	0.0932297	0.126526	1.52375	0.709785	protective	NA
KEGG_NEUROTROPHIN_SIGNALING_PATHWAY	REACTOME_ORGANELLE_BIOGENESIS_AND_MAINTENANCE	rs325923	1	111691513	RAP1A	rs28716841	5	132733467	KIF3A	recessive_dominant	0.0199778	0.0399556	1.52275	0.489807	protective	NA
KEGG_NEUROTROPHIN_SIGNALING_PATHWAY	REACTOME_ORGANELLE_BIOGENESIS_AND_MAINTENANCE	rs1007802	1	206735691	MAPKAPK2	rs200502024	3	121820354	IQCB1	recessive_dominant	0.0122087	0.0288568	1.52264	0.415946	protective	NA
KEGG_NEUROTROPHIN_SIGNALING_PATHWAY	REACTOME_ORGANELLE_BIOGENESIS_AND_MAINTENANCE	rs531967415	1	114764150	NRAS	rs200502024	3	121820354	IQCB1	recessive_dominant	0.0122087	0.0288568	1.52264	0.415946	protective	NA
KEGG_NEUROTROPHIN_SIGNALING_PATHWAY	REACTOME_ORGANELLE_BIOGENESIS_AND_MAINTENANCE	rs12986190	19	40273038	AKT2	rs9294982	6	169696898	TCTE3	recessive	0.00665927	0.0199778	1.52233	0.328864	protective	NA
KEGG_NEUROTROPHIN_SIGNALING_PATHWAY	REACTOME_ORGANELLE_BIOGENESIS_AND_MAINTENANCE	rs11862662	16	81975892	PLCG2	rs73886521	22	46273829	PPARA	recessive_dominant	0.00110988	0.0099889	1.52195	0.110123	protective	NA
KEGG_NEUROTROPHIN_SIGNALING_PATHWAY	REACTOME_ORGANELLE_BIOGENESIS_AND_MAINTENANCE	rs1245510	10	73799959	CAMK2G	rs2655172	8	70154581	NCOA2	dominant	0.399556	0.447281	1.52183	0.822299	protective	NA
KEGG_NEUROTROPHIN_SIGNALING_PATHWAY	REACTOME_ORGANELLE_BIOGENESIS_AND_MAINTENANCE	rs1902716	10	48395086	MAPK8	rs771795	3	101718657	CEP97	dominant	0.257492	0.304107	1.52084	0.793558	protective	NA
KEGG_NEUROTROPHIN_SIGNALING_PATHWAY	REACTOME_ORGANELLE_BIOGENESIS_AND_MAINTENANCE	rs2908290	7	44216137	CAMK2B	rs4679312	3	126676788	CHCHD6	dominant	0.45394	0.504994	1.52074	0.814858	protective	NA
KEGG_NEUROTROPHIN_SIGNALING_PATHWAY	REACTOME_ORGANELLE_BIOGENESIS_AND_MAINTENANCE	rs7076160	10	48473929	MAPK8	rs34144731	4	55921913	CEP135/EXOC1	dominant	0.0954495	0.128746	1.52062	0.714089	protective	NA
KEGG_NEUROTROPHIN_SIGNALING_PATHWAY	REACTOME_ORGANELLE_BIOGENESIS_AND_MAINTENANCE	rs8073151	17	1495834	CRK	rs28396987	22	36823436	IFT27	recessive	0.0299667	0.0521643	1.51976	0.561322	protective	NA
KEGG_NEUROTROPHIN_SIGNALING_PATHWAY	REACTOME_ORGANELLE_BIOGENESIS_AND_MAINTENANCE	rs998521	15	66407072	MAP2K1	rs6961764	7	133131298	CHCHD3	dominant	0.223085	0.27525	1.5197	0.756066	protective	NA
KEGG_NEUROTROPHIN_SIGNALING_PATHWAY	REACTOME_ORGANELLE_BIOGENESIS_AND_MAINTENANCE	rs55702801	14	73255495	PSEN1	rs11668155	19	52247306	PPP2R1A	dominant	0.109878	0.146504	1.51898	0.71914	protective	NA
KEGG_NEUROTROPHIN_SIGNALING_PATHWAY	REACTOME_ORGANELLE_BIOGENESIS_AND_MAINTENANCE	rs10806852	6	166864334	RPS6KA2	rs4821542	22	37252918	SSTR3	recessive_dominant	0.00776915	0.0210877	1.51815	0.363476	protective	NA
KEGG_NEUROTROPHIN_SIGNALING_PATHWAY	REACTOME_ORGANELLE_BIOGENESIS_AND_MAINTENANCE	rs7482257	11	27755298	BDNF	rs62151837	2	73390396	ALMS1	recessive_dominant	0.0876804	0.119867	1.5181	0.705675	protective	NA
KEGG_NEUROTROPHIN_SIGNALING_PATHWAY	REACTOME_ORGANELLE_BIOGENESIS_AND_MAINTENANCE	rs55702801	14	73255495	PSEN1	rs2489138	1	156526564	MEF2D	dominant	0.156493	0.200888	1.51715	0.738005	protective	NA
KEGG_NEUROTROPHIN_SIGNALING_PATHWAY	REACTOME_ORGANELLE_BIOGENESIS_AND_MAINTENANCE	rs3844536	19	396948	SHC2	rs71421442	14	57152633	EXOC5	dominant	0.289678	0.334073	1.51697	0.812915	protective	NA
KEGG_NEUROTROPHIN_SIGNALING_PATHWAY	REACTOME_ORGANELLE_BIOGENESIS_AND_MAINTENANCE	rs9521149	13	109715612	IRS2	rs34144731	4	55921913	CEP135/EXOC1	recessive_dominant	0.0099889	0.0266371	1.51689	0.368694	protective	NA
KEGG_NEUROTROPHIN_SIGNALING_PATHWAY	REACTOME_ORGANELLE_BIOGENESIS_AND_MAINTENANCE	rs3861824	1	58807217	JUN	rs11668155	19	52247306	PPP2R1A	dominant	0.0654828	0.0932297	1.51671	0.681526	protective	NA
KEGG_NEUROTROPHIN_SIGNALING_PATHWAY	REACTOME_ORGANELLE_BIOGENESIS_AND_MAINTENANCE	rs3861824	1	58807217	JUN	rs16996724	22	36772774	IFT27	dominant	0.0133185	0.0344062	1.51666	0.378824	protective	NA
KEGG_NEUROTROPHIN_SIGNALING_PATHWAY	REACTOME_ORGANELLE_BIOGENESIS_AND_MAINTENANCE	rs2908290	7	44216137	CAMK2B	rs3806410	1	156337134	CCT3	recessive_dominant	0.0899001	0.120977	1.51633	0.717744	protective	NA
KEGG_NEUROTROPHIN_SIGNALING_PATHWAY	REACTOME_ORGANELLE_BIOGENESIS_AND_MAINTENANCE	rs2087072	1	243829549	AKT3	rs1611011	13	20695628	IFT88	recessive_dominant	0.100999	0.133185	1.5159	0.731183	protective	NA
KEGG_NEUROTROPHIN_SIGNALING_PATHWAY	REACTOME_ORGANELLE_BIOGENESIS_AND_MAINTENANCE	rs2169633	15	66467291	MAP2K1	rs71421442	14	57152633	EXOC5	recessive_dominant	0.0677026	0.0965594	1.5157	0.679447	protective	NA
KEGG_NEUROTROPHIN_SIGNALING_PATHWAY	REACTOME_ORGANELLE_BIOGENESIS_AND_MAINTENANCE	rs17051913	9	89061524	SHC3	rs3828282	2	218779144	PRKAG3	recessive_dominant	0.0532741	0.0799112	1.51502	0.647909	protective	NA
KEGG_NEUROTROPHIN_SIGNALING_PATHWAY	REACTOME_ORGANELLE_BIOGENESIS_AND_MAINTENANCE	rs557328	19	7902965	MAP2K7	rs2671332	11	103231440	DYNC2H1	recessive_dominant	0.0765816	0.108768	1.51455	0.67954	protective	NA
KEGG_NEUROTROPHIN_SIGNALING_PATHWAY	REACTOME_ORGANELLE_BIOGENESIS_AND_MAINTENANCE	rs2908290	7	44216137	CAMK2B	rs16996724	22	36772774	IFT27	dominant	0.0732519	0.107658	1.5136	0.655152	protective	NA
KEGG_NEUROTROPHIN_SIGNALING_PATHWAY	REACTOME_ORGANELLE_BIOGENESIS_AND_MAINTENANCE	rs13322072	3	179282730	PIK3CA	rs2065994	1	243265536	SDCCAG8	dominant	0.389567	0.441731	1.51279	0.806546	protective	NA
KEGG_NEUROTROPHIN_SIGNALING_PATHWAY	REACTOME_ORGANELLE_BIOGENESIS_AND_MAINTENANCE	rs2803965	14	73098014	PSEN1	rs2130923	4	23781504	PPARGC1A	recessive_dominant	0.0210877	0.0410655	1.51214	0.503034	protective	NA
KEGG_NEUROTROPHIN_SIGNALING_PATHWAY	REACTOME_ORGANELLE_BIOGENESIS_AND_MAINTENANCE	rs62044000	16	81927776	PLCG2	rs1396893	8	55779322	TGS1	recessive_dominant	0.0122087	0.0277469	1.51192	0.433079	protective	NA
KEGG_NEUROTROPHIN_SIGNALING_PATHWAY	REACTOME_ORGANELLE_BIOGENESIS_AND_MAINTENANCE	rs2239798	6	36177857	MAPK13	rs1396893	8	55779322	TGS1	recessive_dominant	0.0410655	0.0643729	1.51186	0.622426	protective	NA
KEGG_NEUROTROPHIN_SIGNALING_PATHWAY	REACTOME_ORGANELLE_BIOGENESIS_AND_MAINTENANCE	rs557328	19	7902965	MAP2K7	rs10779788	1	5945990	NPHP4	recessive_dominant	0.0643729	0.0932297	1.51089	0.66918	protective	NA
KEGG_NEUROTROPHIN_SIGNALING_PATHWAY	REACTOME_ORGANELLE_BIOGENESIS_AND_MAINTENANCE	rs8073151	17	1495834	CRK	rs6855480	4	23747576	PPARGC1A	recessive_dominant	0.0532741	0.0799112	1.5108	0.647909	protective	NA
KEGG_NEUROTROPHIN_SIGNALING_PATHWAY	REACTOME_ORGANELLE_BIOGENESIS_AND_MAINTENANCE	rs28574697	19	48959488	BAX	rs34782630	7	129593069	NRF1	dominant	0.0499445	0.0754717	1.50909	0.643984	protective	NA
KEGG_NEUROTROPHIN_SIGNALING_PATHWAY	REACTOME_ORGANELLE_BIOGENESIS_AND_MAINTENANCE	rs2517	9	130855035	ABL1	rs7790557	7	129759641	NRF1	recessive	0	0.00665927	1.50878	0	protective	NA
KEGG_NEUROTROPHIN_SIGNALING_PATHWAY	REACTOME_ORGANELLE_BIOGENESIS_AND_MAINTENANCE	rs12425324	12	111407697	SH2B3	rs4917904	10	102447292	ACTR1A	recessive_dominant	0.0732519	0.102109	1.50604	0.695053	protective	NA
KEGG_NEUROTROPHIN_SIGNALING_PATHWAY	REACTOME_ORGANELLE_BIOGENESIS_AND_MAINTENANCE	rs1007802	1	206735691	MAPKAPK2	rs4917904	10	102447292	ACTR1A	recessive	0.0122087	0.0288568	1.50591	0.415946	protective	NA
KEGG_NEUROTROPHIN_SIGNALING_PATHWAY	REACTOME_ORGANELLE_BIOGENESIS_AND_MAINTENANCE	rs7805383	7	140908104	BRAF	rs11432188	9	34575985	DCTN3	dominant	0.211987	0.253052	1.50555	0.794064	protective	NA
KEGG_NEUROTROPHIN_SIGNALING_PATHWAY	REACTOME_ORGANELLE_BIOGENESIS_AND_MAINTENANCE	rs529025836	17	63636272	MAP3K3	rs4959880	6	442206	EXOC2	recessive_dominant	0.105438	0.142064	1.50418	0.7118	protective	NA
KEGG_NEUROTROPHIN_SIGNALING_PATHWAY	REACTOME_ORGANELLE_BIOGENESIS_AND_MAINTENANCE	rs8073151	17	1495834	CRK	rs6961764	7	133131298	CHCHD3	recessive_dominant	0.165372	0.203108	1.50355	0.777395	protective	NA
KEGG_NEUROTROPHIN_SIGNALING_PATHWAY	REACTOME_ORGANELLE_BIOGENESIS_AND_MAINTENANCE	rs1007802	1	206735691	MAPKAPK2	rs73886521	22	46273829	PPARA	recessive_dominant	0.00443951	0.0155383	1.50355	0.282529	protective	NA
KEGG_NEUROTROPHIN_SIGNALING_PATHWAY	REACTOME_ORGANELLE_BIOGENESIS_AND_MAINTENANCE	rs36133170	6	166600960	RPS6KA2	rs4959880	6	442206	EXOC2	recessive_dominant	0.00332963	0.00887902	1.50315	0.372912	protective	0.013
KEGG_NEUROTROPHIN_SIGNALING_PATHWAY	REACTOME_ORGANELLE_BIOGENESIS_AND_MAINTENANCE	rs66508783	19	18115826	PIK3R2	rs16949510	18	46102543	HAUS1	recessive_dominant	0.00665927	0.0199778	1.50304	0.328864	protective	NA
KEGG_NEUROTROPHIN_SIGNALING_PATHWAY	REACTOME_ORGANELLE_BIOGENESIS_AND_MAINTENANCE	rs55702801	14	73255495	PSEN1	rs2234182	19	6535080	TUBB4A	dominant	0.124306	0.162042	1.50229	0.734066	protective	NA
KEGG_NEUROTROPHIN_SIGNALING_PATHWAY	REACTOME_ORGANELLE_BIOGENESIS_AND_MAINTENANCE	rs8078982	17	49485912	NGFR	rs4917904	10	102447292	ACTR1A	recessive	0.00332963	0.0155383	1.50192	0.211661	protective	NA
KEGG_NEUROTROPHIN_SIGNALING_PATHWAY	REACTOME_ORGANELLE_BIOGENESIS_AND_MAINTENANCE	rs55967668	5	68241438	PIK3R1	rs4731710	7	130481474	CEP41	recessive_dominant	0.0221976	0.0421754	1.50098	0.515562	protective	NA
KEGG_NEUROTROPHIN_SIGNALING_PATHWAY	REACTOME_ORGANELLE_BIOGENESIS_AND_MAINTENANCE	rs78011207	2	226712412	IRS1	rs10779788	1	5945990	NPHP4	recessive	0.00332963	0.0133185	1.50064	0.247494	protective	NA
KEGG_NEUROTROPHIN_SIGNALING_PATHWAY	REACTOME_ORGANELLE_BIOGENESIS_AND_MAINTENANCE	rs1245510	10	73799959	CAMK2G	rs200502024	3	121820354	IQCB1	recessive_dominant	0.0133185	0.0310766	1.49972	0.420858	protective	NA
KEGG_NEUROTROPHIN_SIGNALING_PATHWAY	REACTOME_ORGANELLE_BIOGENESIS_AND_MAINTENANCE	rs36133170	6	166600960	RPS6KA2	rs58183008	19	14155328	PRKACA	recessive_dominant	0.00110988	0.0099889	1.49845	0.110123	protective	NA
KEGG_NEUROTROPHIN_SIGNALING_PATHWAY	REACTOME_ORGANELLE_BIOGENESIS_AND_MAINTENANCE	rs2239798	6	36177857	MAPK13	rs28396987	22	36823436	IFT27	recessive_dominant	0.0188679	0.0377358	1.49824	0.490385	protective	NA
KEGG_NEUROTROPHIN_SIGNALING_PATHWAY	REACTOME_ORGANELLE_BIOGENESIS_AND_MAINTENANCE	rs13322072	3	179282730	PIK3CA	rs9409189	9	120382927	CDK5RAP2	dominant	0.382908	0.439512	1.49768	0.791299	protective	NA
KEGG_NEUROTROPHIN_SIGNALING_PATHWAY	REACTOME_ORGANELLE_BIOGENESIS_AND_MAINTENANCE	rs2908290	7	44216137	CAMK2B	rs533119830	22	40656205	MCHR1	recessive_dominant	0.104329	0.136515	1.49737	0.736765	protective	NA
KEGG_NEUROTROPHIN_SIGNALING_PATHWAY	REACTOME_ORGANELLE_BIOGENESIS_AND_MAINTENANCE	rs1245510	10	73799959	CAMK2G	rs11168720	12	49146750	TUBA1A/TUBA1B	recessive	0.0244173	0.045505	1.49569	0.524987	protective	NA
KEGG_NEUROTROPHIN_SIGNALING_PATHWAY	REACTOME_ORGANELLE_BIOGENESIS_AND_MAINTENANCE	rs12986190	19	40273038	AKT2	rs4761574	12	94503883	CEP83	dominant	0.301887	0.352941	1.49402	0.792793	protective	NA
KEGG_NEUROTROPHIN_SIGNALING_PATHWAY	REACTOME_ORGANELLE_BIOGENESIS_AND_MAINTENANCE	rs11102837	1	115346655	NGF	rs4821542	22	37252918	SSTR3	recessive_dominant	0.0255272	0.0443951	1.49351	0.563867	protective	NA
KEGG_NEUROTROPHIN_SIGNALING_PATHWAY	REACTOME_ORGANELLE_BIOGENESIS_AND_MAINTENANCE	rs1902716	10	48395086	MAPK8	rs37815	16	3455912	CLUAP1	dominant	0.132075	0.168701	1.49339	0.749857	protective	NA
KEGG_NEUROTROPHIN_SIGNALING_PATHWAY	REACTOME_ORGANELLE_BIOGENESIS_AND_MAINTENANCE	rs56002030	19	49073984	NTF4	rs6961764	7	133131298	CHCHD3	recessive_dominant	0.145394	0.18313	1.49339	0.758882	protective	NA
KEGG_NEUROTROPHIN_SIGNALING_PATHWAY	REACTOME_ORGANELLE_BIOGENESIS_AND_MAINTENANCE	rs17051913	9	89061524	SHC3	rs2847251	18	12751036	CEP76	recessive_dominant	0.0133185	0.0310766	1.49251	0.420858	protective	NA
KEGG_NEUROTROPHIN_SIGNALING_PATHWAY	REACTOME_ORGANELLE_BIOGENESIS_AND_MAINTENANCE	rs7805383	7	140908104	BRAF	rs36222127	17	75876781	FBF1	dominant	0.337403	0.389567	1.49248	0.797912	protective	NA
KEGG_NEUROTROPHIN_SIGNALING_PATHWAY	REACTOME_ORGANELLE_BIOGENESIS_AND_MAINTENANCE	rs200089036	19	38902723	NFKBIB	rs979802	11	103388805	DYNC2H1	recessive_dominant	0.108768	0.142064	1.49223	0.737021	protective	NA
KEGG_NEUROTROPHIN_SIGNALING_PATHWAY	REACTOME_ORGANELLE_BIOGENESIS_AND_MAINTENANCE	rs531967415	1	114764150	NRAS	rs4726122	7	151675463	PRKAG2	recessive_dominant	0.107658	0.140954	1.492	0.73528	protective	NA
KEGG_NEUROTROPHIN_SIGNALING_PATHWAY	REACTOME_ORGANELLE_BIOGENESIS_AND_MAINTENANCE	rs2517	9	130855035	ABL1	rs71421442	14	57152633	EXOC5	recessive_dominant	0.0244173	0.0443951	1.49136	0.538737	protective	NA
KEGG_NEUROTROPHIN_SIGNALING_PATHWAY	REACTOME_ORGANELLE_BIOGENESIS_AND_MAINTENANCE	rs2169633	15	66467291	MAP2K1	rs62151837	2	73390396	ALMS1	dominant	0.328524	0.376249	1.49056	0.811097	protective	NA
KEGG_NEUROTROPHIN_SIGNALING_PATHWAY	REACTOME_ORGANELLE_BIOGENESIS_AND_MAINTENANCE	rs12070845	1	109261850	SORT1	rs890980	5	477303	EXOC3	recessive_dominant	0	0.00665927	1.49053	0	protective	NA
KEGG_NEUROTROPHIN_SIGNALING_PATHWAY	REACTOME_ORGANELLE_BIOGENESIS_AND_MAINTENANCE	rs17051913	9	89061524	SHC3	rs2130923	4	23781504	PPARGC1A	dominant	0.129856	0.165372	1.49047	0.753184	protective	NA
KEGG_NEUROTROPHIN_SIGNALING_PATHWAY	REACTOME_ORGANELLE_BIOGENESIS_AND_MAINTENANCE	rs9521149	13	109715612	IRS2	rs16996724	22	36772774	IFT27	dominant	0.0743618	0.108768	1.49	0.658261	protective	NA
KEGG_NEUROTROPHIN_SIGNALING_PATHWAY	REACTOME_ORGANELLE_BIOGENESIS_AND_MAINTENANCE	rs2075076	7	44274642	CAMK2B	rs76940793	3	160447833	IFT80	dominant	0.0344062	0.0566038	1.48963	0.59387	protective	NA
KEGG_NEUROTROPHIN_SIGNALING_PATHWAY	REACTOME_ORGANELLE_BIOGENESIS_AND_MAINTENANCE	rs1902716	10	48395086	MAPK8	rs553512184	1	153989995	CRTC2	dominant	0.291898	0.336293	1.48955	0.813568	protective	NA
KEGG_NEUROTROPHIN_SIGNALING_PATHWAY	REACTOME_ORGANELLE_BIOGENESIS_AND_MAINTENANCE	rs66508783	19	18115826	PIK3R2	rs4917904	10	102447292	ACTR1A	recessive_dominant	0.0221976	0.0443951	1.48817	0.488649	protective	NA
KEGG_NEUROTROPHIN_SIGNALING_PATHWAY	REACTOME_ORGANELLE_BIOGENESIS_AND_MAINTENANCE	rs2908290	7	44216137	CAMK2B	rs11287280	3	45836823	LZTFL1	recessive_dominant	0.0188679	0.0321865	1.48814	0.578249	protective	NA
KEGG_NEUROTROPHIN_SIGNALING_PATHWAY	REACTOME_ORGANELLE_BIOGENESIS_AND_MAINTENANCE	rs557328	19	7902965	MAP2K7	rs7214893	17	76140308	EXOC7	dominant	0.281909	0.330744	1.48784	0.794384	protective	NA
KEGG_NEUROTROPHIN_SIGNALING_PATHWAY	REACTOME_ORGANELLE_BIOGENESIS_AND_MAINTENANCE	rs9347129	6	166895934	RPS6KA2	rs2356069	7	139162346	TTC26	recessive	0.00443951	0.0166482	1.48662	0.263397	protective	NA
KEGG_NEUROTROPHIN_SIGNALING_PATHWAY	REACTOME_ORGANELLE_BIOGENESIS_AND_MAINTENANCE	rs557328	19	7902965	MAP2K7	rs34782630	7	129593069	NRF1	recessive_dominant	0.0299667	0.0510544	1.48219	0.574197	protective	NA
KEGG_NEUROTROPHIN_SIGNALING_PATHWAY	REACTOME_ORGANELLE_BIOGENESIS_AND_MAINTENANCE	rs557328	19	7902965	MAP2K7	rs11707509	3	196346629	TCTEX1D2	recessive_dominant	0.0677026	0.100999	1.48217	0.646389	protective	NA
KEGG_NEUROTROPHIN_SIGNALING_PATHWAY	REACTOME_ORGANELLE_BIOGENESIS_AND_MAINTENANCE	rs7076160	10	48473929	MAPK8	rs4531944	2	166001810	TTC21B	dominant	0.147614	0.186459	1.48175	0.755588	protective	NA
KEGG_NEUROTROPHIN_SIGNALING_PATHWAY	REACTOME_ORGANELLE_BIOGENESIS_AND_MAINTENANCE	rs7805383	7	140908104	BRAF	rs11707509	3	196346629	TCTEX1D2	recessive_dominant	0.134295	0.172031	1.48157	0.746617	protective	NA
KEGG_NEUROTROPHIN_SIGNALING_PATHWAY	REACTOME_ORGANELLE_BIOGENESIS_AND_MAINTENANCE	rs7222654	17	8932404	PIK3R5	rs6534321	4	122692023	BBS12	recessive_dominant	0.00887902	0.0221976	1.48146	0.394625	protective	NA
KEGG_NEUROTROPHIN_SIGNALING_PATHWAY	REACTOME_ORGANELLE_BIOGENESIS_AND_MAINTENANCE	rs7482257	11	27755298	BDNF	rs36222127	17	75876781	FBF1	recessive_dominant	0.0832408	0.113208	1.48112	0.711259	protective	NA
KEGG_NEUROTROPHIN_SIGNALING_PATHWAY	REACTOME_ORGANELLE_BIOGENESIS_AND_MAINTENANCE	rs55702801	14	73255495	PSEN1	rs2130923	4	23781504	PPARGC1A	dominant	0.0921199	0.126526	1.48102	0.700478	protective	NA
KEGG_NEUROTROPHIN_SIGNALING_PATHWAY	REACTOME_ORGANELLE_BIOGENESIS_AND_MAINTENANCE	rs557328	19	7902965	MAP2K7	rs10416968	19	41407637	B9D2	dominant	0.324084	0.374029	1.48077	0.802444	protective	0.002
KEGG_NEUROTROPHIN_SIGNALING_PATHWAY	REACTOME_ORGANELLE_BIOGENESIS_AND_MAINTENANCE	rs12070845	1	109261850	SORT1	rs6701114	1	1022037	PERM1	recessive_dominant	0	0.00776915	1.48014	0	protective	0.009
KEGG_NEUROTROPHIN_SIGNALING_PATHWAY	REACTOME_ORGANELLE_BIOGENESIS_AND_MAINTENANCE	rs56002030	19	49073984	NTF4	rs72620819	2	238354982	TRAF3IP1	recessive	0.00221976	0.0122087	1.4801	0.179998	protective	NA
KEGG_NEUROTROPHIN_SIGNALING_PATHWAY	REACTOME_ORGANELLE_BIOGENESIS_AND_MAINTENANCE	rs2859240	1	172624233	FASLG	rs73054883	19	52207932	PPP2R1A	recessive_dominant	0.00332963	0.0155383	1.48007	0.211661	protective	NA
KEGG_NEUROTROPHIN_SIGNALING_PATHWAY	REACTOME_ORGANELLE_BIOGENESIS_AND_MAINTENANCE	rs11063604	12	5408423	NTF3	rs37815	16	3455912	CLUAP1	recessive_dominant	0.0110988	0.0277469	1.47972	0.393266	protective	NA
KEGG_NEUROTROPHIN_SIGNALING_PATHWAY	REACTOME_ORGANELLE_BIOGENESIS_AND_MAINTENANCE	rs545970	6	44239677	NFKBIE	rs71421442	14	57152633	EXOC5	recessive_dominant	0.0355161	0.0577137	1.4792	0.601222	protective	NA
KEGG_NEUROTROPHIN_SIGNALING_PATHWAY	REACTOME_ORGANELLE_BIOGENESIS_AND_MAINTENANCE	rs1018102	1	22041073	CDC42	rs17166570	5	132660439	KIF3A	dominant	0.0654828	0.0976693	1.47906	0.647363	protective	NA
KEGG_NEUROTROPHIN_SIGNALING_PATHWAY	REACTOME_ORGANELLE_BIOGENESIS_AND_MAINTENANCE	rs4820983	22	31929654	YWHAH	rs17166570	5	132660439	KIF3A	dominant	0.0654828	0.0976693	1.47906	0.647363	protective	NA
KEGG_NEUROTROPHIN_SIGNALING_PATHWAY	REACTOME_ORGANELLE_BIOGENESIS_AND_MAINTENANCE	rs9347129	6	166895934	RPS6KA2	rs4655200	1	20672101	KIF17	recessive_dominant	0.0099889	0.0255272	1.47831	0.385163	protective	NA
KEGG_NEUROTROPHIN_SIGNALING_PATHWAY	REACTOME_ORGANELLE_BIOGENESIS_AND_MAINTENANCE	rs8073151	17	1495834	CRK	rs4936388	11	117440404	CEP164	recessive_dominant	0.0710322	0.099889	1.47831	0.689022	protective	NA
KEGG_NEUROTROPHIN_SIGNALING_PATHWAY	REACTOME_ORGANELLE_BIOGENESIS_AND_MAINTENANCE	rs4144887	6	166747512	RPS6KA2	rs6751305	2	61876220	CCT4	recessive_dominant	0.117647	0.152053	1.47753	0.743552	protective	NA
KEGG_NEUROTROPHIN_SIGNALING_PATHWAY	REACTOME_ORGANELLE_BIOGENESIS_AND_MAINTENANCE	rs1245510	10	73799959	CAMK2G	rs34487560	4	56029268	CEP135	recessive	0.0288568	0.0499445	1.47746	0.565232	protective	NA
KEGG_NEUROTROPHIN_SIGNALING_PATHWAY	REACTOME_ORGANELLE_BIOGENESIS_AND_MAINTENANCE	rs557328	19	7902965	MAP2K7	rs2065994	1	243265536	SDCCAG8	dominant	0.326304	0.376249	1.47698	0.802962	protective	NA
KEGG_NEUROTROPHIN_SIGNALING_PATHWAY	REACTOME_ORGANELLE_BIOGENESIS_AND_MAINTENANCE	rs2803965	14	73098014	PSEN1	rs2072826	6	135253558	AHI1	dominant	0.210877	0.253052	1.47686	0.788795	protective	NA
KEGG_NEUROTROPHIN_SIGNALING_PATHWAY	REACTOME_ORGANELLE_BIOGENESIS_AND_MAINTENANCE	rs55894401	16	81730962	PLCG2	rs28396987	22	36823436	IFT27	recessive	0.0166482	0.0332963	1.47582	0.491535	protective	NA
KEGG_NEUROTROPHIN_SIGNALING_PATHWAY	REACTOME_ORGANELLE_BIOGENESIS_AND_MAINTENANCE	rs529025836	17	63636272	MAP3K3	rs1365962	2	218857832	PRKAG3	recessive	0.0332963	0.0577137	1.47539	0.562351	protective	NA
KEGG_NEUROTROPHIN_SIGNALING_PATHWAY	REACTOME_ORGANELLE_BIOGENESIS_AND_MAINTENANCE	rs2517	9	130855035	ABL1	rs4531944	2	166001810	TTC21B	recessive	0	0.00665927	1.47366	0	protective	NA
KEGG_NEUROTROPHIN_SIGNALING_PATHWAY	REACTOME_ORGANELLE_BIOGENESIS_AND_MAINTENANCE	rs62315570	4	86331750	MAPK10	rs9294982	6	169696898	TCTE3	dominant	0.396226	0.447281	1.4725	0.810949	protective	NA
KEGG_NEUROTROPHIN_SIGNALING_PATHWAY	REACTOME_ORGANELLE_BIOGENESIS_AND_MAINTENANCE	rs998521	15	66407072	MAP2K1	rs11668155	19	52247306	PPP2R1A	dominant	0.127636	0.172031	1.47221	0.704178	protective	NA
KEGG_NEUROTROPHIN_SIGNALING_PATHWAY	REACTOME_ORGANELLE_BIOGENESIS_AND_MAINTENANCE	rs55702801	14	73255495	PSEN1	rs37815	16	3455912	CLUAP1	dominant	0.0743618	0.106548	1.47211	0.673649	protective	NA
KEGG_NEUROTROPHIN_SIGNALING_PATHWAY	REACTOME_ORGANELLE_BIOGENESIS_AND_MAINTENANCE	rs8073151	17	1495834	CRK	rs28716841	5	132733467	KIF3A	recessive_dominant	0.0210877	0.0410655	1.47151	0.503034	protective	NA
KEGG_NEUROTROPHIN_SIGNALING_PATHWAY	REACTOME_ORGANELLE_BIOGENESIS_AND_MAINTENANCE	rs2169633	15	66467291	MAP2K1	rs6432044	2	10041284	CYS1	recessive_dominant	0.0776915	0.106548	1.47006	0.706353	protective	NA
KEGG_NEUROTROPHIN_SIGNALING_PATHWAY	REACTOME_ORGANELLE_BIOGENESIS_AND_MAINTENANCE	rs531967415	1	114764150	NRAS	rs7214893	17	76140308	EXOC7	recessive_dominant	0.0954495	0.126526	1.46973	0.728468	protective	NA
KEGG_NEUROTROPHIN_SIGNALING_PATHWAY	REACTOME_ORGANELLE_BIOGENESIS_AND_MAINTENANCE	rs10413331	19	58203728	ZNF274	rs10812525	9	27084462	IFT74	recessive_dominant	0.0532741	0.0788013	1.46954	0.657827	protective	NA
KEGG_NEUROTROPHIN_SIGNALING_PATHWAY	REACTOME_ORGANELLE_BIOGENESIS_AND_MAINTENANCE	rs62315570	4	86331750	MAPK10	rs2369963	3	132730101	NPHP3	recessive_dominant	0.09101	0.122087	1.46907	0.719969	protective	NA
KEGG_NEUROTROPHIN_SIGNALING_PATHWAY	REACTOME_ORGANELLE_BIOGENESIS_AND_MAINTENANCE	rs2517	9	130855035	ABL1	rs112830612	9	19007971	HAUS6	recessive_dominant	0.00110988	0.0099889	1.46839	0.110123	protective	0.005
KEGG_NEUROTROPHIN_SIGNALING_PATHWAY	REACTOME_ORGANELLE_BIOGENESIS_AND_MAINTENANCE	rs201635960	5	180199887	MAPK9	rs2388229	16	53556997	RPGRIP1L	recessive_dominant	0.0621532	0.0899001	1.4672	0.670904	protective	NA
KEGG_NEUROTROPHIN_SIGNALING_PATHWAY	REACTOME_ORGANELLE_BIOGENESIS_AND_MAINTENANCE	rs7076160	10	48473929	MAPK8	rs2388229	16	53556997	RPGRIP1L	dominant	0.286349	0.334073	1.46677	0.799822	protective	NA
KEGG_NEUROTROPHIN_SIGNALING_PATHWAY	REACTOME_ORGANELLE_BIOGENESIS_AND_MAINTENANCE	rs3861824	1	58807217	JUN	rs73094828	20	32316895	KIF3B	dominant	0.0233074	0.0432852	1.46634	0.527448	protective	NA
KEGG_NEUROTROPHIN_SIGNALING_PATHWAY	REACTOME_ORGANELLE_BIOGENESIS_AND_MAINTENANCE	rs3861824	1	58807217	JUN	rs7833836	8	17935642	PCM1	dominant	0.104329	0.135405	1.46448	0.743759	protective	NA
KEGG_NEUROTROPHIN_SIGNALING_PATHWAY	REACTOME_ORGANELLE_BIOGENESIS_AND_MAINTENANCE	rs13322072	3	179282730	PIK3CA	rs11168720	12	49146750	TUBA1A/TUBA1B	dominant	0.315205	0.36515	1.46426	0.800264	protective	NA
KEGG_NEUROTROPHIN_SIGNALING_PATHWAY	REACTOME_ORGANELLE_BIOGENESIS_AND_MAINTENANCE	rs200089036	19	38902723	NFKBIB	rs73054883	19	52207932	PPP2R1A	recessive_dominant	0.00332963	0.0133185	1.46321	0.247494	protective	2.031e-05
KEGG_NEUROTROPHIN_SIGNALING_PATHWAY	REACTOME_ORGANELLE_BIOGENESIS_AND_MAINTENANCE	rs34137352	1	3694480	TP73	rs533119830	22	40656205	MCHR1	dominant	0.116537	0.149834	1.46289	0.748465	protective	NA
KEGG_NEUROTROPHIN_SIGNALING_PATHWAY	REACTOME_ORGANELLE_BIOGENESIS_AND_MAINTENANCE	rs1245510	10	73799959	CAMK2G	rs4726122	7	151675463	PRKAG2	dominant	0.410655	0.45727	1.46288	0.827025	protective	NA
KEGG_NEUROTROPHIN_SIGNALING_PATHWAY	REACTOME_ORGANELLE_BIOGENESIS_AND_MAINTENANCE	rs1245510	10	73799959	CAMK2G	rs4821542	22	37252918	SSTR3	recessive_dominant	0.0244173	0.045505	1.46267	0.524987	protective	NA
KEGG_NEUROTROPHIN_SIGNALING_PATHWAY	REACTOME_ORGANELLE_BIOGENESIS_AND_MAINTENANCE	rs7805383	7	140908104	BRAF	rs10779788	1	5945990	NPHP4	dominant	0.375139	0.420644	1.4625	0.826874	protective	NA
KEGG_NEUROTROPHIN_SIGNALING_PATHWAY	REACTOME_ORGANELLE_BIOGENESIS_AND_MAINTENANCE	rs7076160	10	48473929	MAPK8	rs1611011	13	20695628	IFT88	dominant	0.216426	0.257492	1.4623	0.796467	protective	NA
KEGG_NEUROTROPHIN_SIGNALING_PATHWAY	REACTOME_ORGANELLE_BIOGENESIS_AND_MAINTENANCE	rs557328	19	7902965	MAP2K7	rs2388229	16	53556997	RPGRIP1L	recessive_dominant	0.0799112	0.108768	1.46214	0.711652	protective	NA
KEGG_NEUROTROPHIN_SIGNALING_PATHWAY	REACTOME_ORGANELLE_BIOGENESIS_AND_MAINTENANCE	rs8073151	17	1495834	CRK	rs62151837	2	73390396	ALMS1	recessive_dominant	0.142064	0.17869	1.46144	0.761091	protective	NA
KEGG_NEUROTROPHIN_SIGNALING_PATHWAY	REACTOME_ORGANELLE_BIOGENESIS_AND_MAINTENANCE	rs62044000	16	81927776	PLCG2	rs4329481	1	20658089	KIF17	recessive_dominant	0.00110988	0.00887902	1.46077	0.124028	protective	NA
KEGG_NEUROTROPHIN_SIGNALING_PATHWAY	REACTOME_ORGANELLE_BIOGENESIS_AND_MAINTENANCE	rs1902716	10	48395086	MAPK8	rs6534321	4	122692023	BBS12	dominant	0.137625	0.174251	1.46028	0.756265	protective	NA
KEGG_NEUROTROPHIN_SIGNALING_PATHWAY	REACTOME_ORGANELLE_BIOGENESIS_AND_MAINTENANCE	rs36133170	6	166600960	RPS6KA2	rs10418927	19	16168734	RAB8A	recessive_dominant	0.00110988	0.0099889	1.46006	0.110123	protective	NA
KEGG_NEUROTROPHIN_SIGNALING_PATHWAY	REACTOME_ORGANELLE_BIOGENESIS_AND_MAINTENANCE	rs201635960	5	180199887	MAPK9	rs2212010	21	25811151	GABPA	recessive_dominant	0.0521643	0.082131	1.46004	0.615055	protective	NA
KEGG_NEUROTROPHIN_SIGNALING_PATHWAY	REACTOME_ORGANELLE_BIOGENESIS_AND_MAINTENANCE	rs2239798	6	36177857	MAPK13	rs76940793	3	160447833	IFT80	dominant	0.0233074	0.0421754	1.45931	0.541956	protective	NA
KEGG_NEUROTROPHIN_SIGNALING_PATHWAY	REACTOME_ORGANELLE_BIOGENESIS_AND_MAINTENANCE	rs2239798	6	36177857	MAPK13	rs2072826	6	135253558	AHI1	recessive_dominant	0.0233074	0.0421754	1.45931	0.541956	protective	6.538e-05
KEGG_NEUROTROPHIN_SIGNALING_PATHWAY	REACTOME_ORGANELLE_BIOGENESIS_AND_MAINTENANCE	rs11063604	12	5408423	NTF3	rs6464184	7	151625412	PRKAG2	recessive_dominant	0.017758	0.0355161	1.45796	0.49096	protective	NA
KEGG_NEUROTROPHIN_SIGNALING_PATHWAY	REACTOME_ORGANELLE_BIOGENESIS_AND_MAINTENANCE	rs11063604	12	5408423	NTF3	rs7804751	7	151645370	PRKAG2	recessive_dominant	0.0277469	0.0477248	1.45757	0.569449	protective	NA
KEGG_NEUROTROPHIN_SIGNALING_PATHWAY	REACTOME_ORGANELLE_BIOGENESIS_AND_MAINTENANCE	rs2803965	14	73098014	PSEN1	rs34782630	7	129593069	NRF1	recessive_dominant	0.0221976	0.0410655	1.45672	0.53011	protective	NA
KEGG_NEUROTROPHIN_SIGNALING_PATHWAY	REACTOME_ORGANELLE_BIOGENESIS_AND_MAINTENANCE	rs55702801	14	73255495	PSEN1	rs6432044	2	10041284	CYS1	recessive_dominant	0.036626	0.0643729	1.45584	0.552578	protective	NA
KEGG_NEUROTROPHIN_SIGNALING_PATHWAY	REACTOME_ORGANELLE_BIOGENESIS_AND_MAINTENANCE	rs17051913	9	89061524	SHC3	rs7833836	8	17935642	PCM1	dominant	0.241953	0.293008	1.45579	0.770143	protective	NA
KEGG_NEUROTROPHIN_SIGNALING_PATHWAY	REACTOME_ORGANELLE_BIOGENESIS_AND_MAINTENANCE	rs66508783	19	18115826	PIK3R2	rs6961764	7	133131298	CHCHD3	recessive_dominant	0.0532741	0.0788013	1.45436	0.657827	protective	NA
KEGG_NEUROTROPHIN_SIGNALING_PATHWAY	REACTOME_ORGANELLE_BIOGENESIS_AND_MAINTENANCE	rs3861824	1	58807217	JUN	rs533119830	22	40656205	MCHR1	recessive_dominant	0.0099889	0.0255272	1.45428	0.385163	protective	NA
KEGG_NEUROTROPHIN_SIGNALING_PATHWAY	REACTOME_ORGANELLE_BIOGENESIS_AND_MAINTENANCE	rs2803965	14	73098014	PSEN1	rs2655172	8	70154581	NCOA2	dominant	0.318535	0.36404	1.45399	0.816572	protective	NA
KEGG_NEUROTROPHIN_SIGNALING_PATHWAY	REACTOME_ORGANELLE_BIOGENESIS_AND_MAINTENANCE	rs9759629	4	113743604	CAMK2D	rs11429505	8	70278596	NCOA2	dominant	0.420644	0.471698	1.45386	0.81318	protective	NA
KEGG_NEUROTROPHIN_SIGNALING_PATHWAY	REACTOME_ORGANELLE_BIOGENESIS_AND_MAINTENANCE	rs8078982	17	49485912	NGFR	rs74183366	19	35674986	HAUS5	recessive	0.0122087	0.0266371	1.4538	0.451639	protective	NA
KEGG_NEUROTROPHIN_SIGNALING_PATHWAY	REACTOME_ORGANELLE_BIOGENESIS_AND_MAINTENANCE	rs55967668	5	68241438	PIK3R1	rs11168720	12	49146750	TUBA1A/TUBA1B	recessive_dominant	0.0255272	0.0466149	1.45369	0.535769	protective	NA
KEGG_NEUROTROPHIN_SIGNALING_PATHWAY	REACTOME_ORGANELLE_BIOGENESIS_AND_MAINTENANCE	rs2908290	7	44216137	CAMK2B	rs2748246	5	149795273	PPARGC1B	recessive_dominant	0.0921199	0.127636	1.45362	0.693505	protective	NA
KEGG_NEUROTROPHIN_SIGNALING_PATHWAY	REACTOME_ORGANELLE_BIOGENESIS_AND_MAINTENANCE	rs4791329	17	7693455	TP53	rs7833836	8	17935642	PCM1	recessive_dominant	0.0932297	0.124306	1.45356	0.724296	protective	NA
KEGG_NEUROTROPHIN_SIGNALING_PATHWAY	REACTOME_ORGANELLE_BIOGENESIS_AND_MAINTENANCE	rs4791329	17	7693455	TP53	rs2065994	1	243265536	SDCCAG8	recessive_dominant	0.0932297	0.124306	1.45356	0.724296	protective	NA
KEGG_NEUROTROPHIN_SIGNALING_PATHWAY	REACTOME_ORGANELLE_BIOGENESIS_AND_MAINTENANCE	rs325923	1	111691513	RAP1A	rs17166570	5	132660439	KIF3A	dominant	0.0665927	0.0987791	1.45307	0.65091	protective	NA
KEGG_NEUROTROPHIN_SIGNALING_PATHWAY	REACTOME_ORGANELLE_BIOGENESIS_AND_MAINTENANCE	rs1902716	10	48395086	MAPK8	rs6961764	7	133131298	CHCHD3	dominant	0.277469	0.320755	1.45272	0.813229	protective	NA
KEGG_NEUROTROPHIN_SIGNALING_PATHWAY	REACTOME_ORGANELLE_BIOGENESIS_AND_MAINTENANCE	rs531967415	1	114764150	NRAS	rs11287280	3	45836823	LZTFL1	recessive_dominant	0.0144284	0.0299667	1.45189	0.473891	protective	NA
KEGG_NEUROTROPHIN_SIGNALING_PATHWAY	REACTOME_ORGANELLE_BIOGENESIS_AND_MAINTENANCE	rs9759629	4	113743604	CAMK2D	rs17017668	1	211694508	NEK2	dominant	0.0965594	0.128746	1.45074	0.72328	protective	NA
KEGG_NEUROTROPHIN_SIGNALING_PATHWAY	REACTOME_ORGANELLE_BIOGENESIS_AND_MAINTENANCE	rs998521	15	66407072	MAP2K1	rs4726122	7	151675463	PRKAG2	dominant	0.199778	0.249723	1.45048	0.750069	protective	NA
KEGG_NEUROTROPHIN_SIGNALING_PATHWAY	REACTOME_ORGANELLE_BIOGENESIS_AND_MAINTENANCE	rs7482257	11	27755298	BDNF	rs3806410	1	156337134	CCT3	recessive_dominant	0.0865705	0.117647	1.45044	0.710814	protective	NA
KEGG_NEUROTROPHIN_SIGNALING_PATHWAY	REACTOME_ORGANELLE_BIOGENESIS_AND_MAINTENANCE	rs9759629	4	113743604	CAMK2D	rs12935211	16	58015332	CNGB1	dominant	0.339623	0.385128	1.44945	0.821079	protective	NA
KEGG_NEUROTROPHIN_SIGNALING_PATHWAY	REACTOME_ORGANELLE_BIOGENESIS_AND_MAINTENANCE	rs2239798	6	36177857	MAPK13	rs71421442	14	57152633	EXOC5	recessive_dominant	0.0210877	0.0399556	1.44896	0.517605	protective	NA
KEGG_NEUROTROPHIN_SIGNALING_PATHWAY	REACTOME_ORGANELLE_BIOGENESIS_AND_MAINTENANCE	rs8073151	17	1495834	CRK	rs227911	17	64541343	POLG2	recessive	0.0377358	0.0610433	1.44845	0.603209	protective	0.002
KEGG_NEUROTROPHIN_SIGNALING_PATHWAY	REACTOME_ORGANELLE_BIOGENESIS_AND_MAINTENANCE	rs4144887	6	166747512	RPS6KA2	rs62151837	2	73390396	ALMS1	dominant	0.254162	0.297447	1.44745	0.804887	protective	NA
KEGG_NEUROTROPHIN_SIGNALING_PATHWAY	REACTOME_ORGANELLE_BIOGENESIS_AND_MAINTENANCE	rs12070845	1	109261850	SORT1	rs6961764	7	133131298	CHCHD3	recessive_dominant	0	0.00776915	1.447	0	protective	NA
KEGG_NEUROTROPHIN_SIGNALING_PATHWAY	REACTOME_ORGANELLE_BIOGENESIS_AND_MAINTENANCE	rs9759629	4	113743604	CAMK2D	rs1917460	11	103527656	DYNC2H1	dominant	0.304107	0.349612	1.44696	0.812962	protective	NA
KEGG_NEUROTROPHIN_SIGNALING_PATHWAY	REACTOME_ORGANELLE_BIOGENESIS_AND_MAINTENANCE	rs7805383	7	140908104	BRAF	rs201143490	9	136452021	INPP5E	dominant	0.369589	0.415094	1.44603	0.826104	protective	NA
KEGG_NEUROTROPHIN_SIGNALING_PATHWAY	REACTOME_ORGANELLE_BIOGENESIS_AND_MAINTENANCE	rs2803965	14	73098014	PSEN1	rs11668155	19	52247306	PPP2R1A	recessive_dominant	0.0310766	0.0510544	1.44489	0.596145	protective	NA
KEGG_NEUROTROPHIN_SIGNALING_PATHWAY	REACTOME_ORGANELLE_BIOGENESIS_AND_MAINTENANCE	rs2908290	7	44216137	CAMK2B	rs536327334	13	20581760	IFT88	dominant	0.473918	0.521643	1.44488	0.826093	protective	NA
KEGG_NEUROTROPHIN_SIGNALING_PATHWAY	REACTOME_ORGANELLE_BIOGENESIS_AND_MAINTENANCE	rs8073151	17	1495834	CRK	rs12935211	16	58015332	CNGB1	recessive_dominant	0.168701	0.205327	1.44375	0.785422	protective	NA
KEGG_NEUROTROPHIN_SIGNALING_PATHWAY	REACTOME_ORGANELLE_BIOGENESIS_AND_MAINTENANCE	rs2908290	7	44216137	CAMK2B	rs10883462	10	102095122	PPRC1	dominant	0.45283	0.500555	1.44284	0.825751	protective	NA
KEGG_NEUROTROPHIN_SIGNALING_PATHWAY	REACTOME_ORGANELLE_BIOGENESIS_AND_MAINTENANCE	rs6916254	6	136738115	MAP3K5	rs2311600	2	121340676	CLASP1	recessive	0	0.00665927	1.44266	0	protective	NA
KEGG_NEUROTROPHIN_SIGNALING_PATHWAY	REACTOME_ORGANELLE_BIOGENESIS_AND_MAINTENANCE	rs529025836	17	63636272	MAP3K3	rs11707509	3	196346629	TCTEX1D2	recessive	0.017758	0.0377358	1.44178	0.461017	protective	NA
KEGG_NEUROTROPHIN_SIGNALING_PATHWAY	REACTOME_ORGANELLE_BIOGENESIS_AND_MAINTENANCE	rs7805383	7	140908104	BRAF	rs11287280	3	45836823	LZTFL1	recessive_dominant	0.0133185	0.0299667	1.44148	0.436945	protective	NA
KEGG_NEUROTROPHIN_SIGNALING_PATHWAY	REACTOME_ORGANELLE_BIOGENESIS_AND_MAINTENANCE	rs9347129	6	166895934	RPS6KA2	rs2072826	6	135253558	AHI1	recessive_dominant	0.00887902	0.0233074	1.44122	0.375407	protective	2.686e-04
KEGG_NEUROTROPHIN_SIGNALING_PATHWAY	REACTOME_ORGANELLE_BIOGENESIS_AND_MAINTENANCE	rs2537850	14	90970875	RPS6KA5	rs6855480	4	23747576	PPARGC1A	recessive_dominant	0.0244173	0.0432852	1.43976	0.553193	protective	NA
KEGG_NEUROTROPHIN_SIGNALING_PATHWAY	REACTOME_ORGANELLE_BIOGENESIS_AND_MAINTENANCE	rs12425324	12	111407697	SH2B3	rs10460000	18	12320551	TUBB6	recessive_dominant	0.0876804	0.118757	1.43964	0.713168	protective	NA
KEGG_NEUROTROPHIN_SIGNALING_PATHWAY	REACTOME_ORGANELLE_BIOGENESIS_AND_MAINTENANCE	rs370589300	22	21718890	MAPK1	rs2021883	7	33122453	BBS9	recessive_dominant	0.0144284	0.0299667	1.43937	0.473891	protective	NA
KEGG_NEUROTROPHIN_SIGNALING_PATHWAY	REACTOME_ORGANELLE_BIOGENESIS_AND_MAINTENANCE	rs11063604	12	5408423	NTF3	rs6432044	2	10041284	CYS1	recessive_dominant	0.054384	0.0854606	1.43917	0.61545	protective	NA
KEGG_NEUROTROPHIN_SIGNALING_PATHWAY	REACTOME_ORGANELLE_BIOGENESIS_AND_MAINTENANCE	rs7805383	7	140908104	BRAF	rs60599587	16	2054872	PKD1	recessive_dominant	0.124306	0.166482	1.43845	0.710706	protective	NA
KEGG_NEUROTROPHIN_SIGNALING_PATHWAY	REACTOME_ORGANELLE_BIOGENESIS_AND_MAINTENANCE	rs4820983	22	31929654	YWHAH	rs11287280	3	45836823	LZTFL1	recessive_dominant	0.0133185	0.0299667	1.43811	0.436945	protective	NA
KEGG_NEUROTROPHIN_SIGNALING_PATHWAY	REACTOME_ORGANELLE_BIOGENESIS_AND_MAINTENANCE	rs9786966	1	3623414	TP73	rs76940793	3	160447833	IFT80	recessive_dominant	0.0122087	0.0266371	1.43784	0.451639	protective	NA
KEGG_NEUROTROPHIN_SIGNALING_PATHWAY	REACTOME_ORGANELLE_BIOGENESIS_AND_MAINTENANCE	rs2908290	7	44216137	CAMK2B	rs113582339	7	151529654	PRKAG2	recessive_dominant	0.0210877	0.0421754	1.43674	0.489229	protective	2.908e-04
KEGG_NEUROTROPHIN_SIGNALING_PATHWAY	REACTOME_ORGANELLE_BIOGENESIS_AND_MAINTENANCE	rs17051913	9	89061524	SHC3	rs235301	21	46297256	PCNT	recessive_dominant	0.0144284	0.0221976	1.43654	0.644876	protective	NA
KEGG_NEUROTROPHIN_SIGNALING_PATHWAY	REACTOME_ORGANELLE_BIOGENESIS_AND_MAINTENANCE	rs4307417	9	89218258	SHC3	rs59972802	17	2672013	PAFAH1B1	recessive	0.0099889	0.0233074	1.43637	0.422806	protective	NA
KEGG_NEUROTROPHIN_SIGNALING_PATHWAY	REACTOME_ORGANELLE_BIOGENESIS_AND_MAINTENANCE	rs529025836	17	63636272	MAP3K3	rs6074138	20	10418801	MKKS	recessive	0.0399556	0.0654828	1.4363	0.593945	protective	NA
KEGG_NEUROTROPHIN_SIGNALING_PATHWAY	REACTOME_ORGANELLE_BIOGENESIS_AND_MAINTENANCE	rs11102837	1	115346655	NGF	rs28716841	5	132733467	KIF3A	dominant	0.0699223	0.0976693	1.4358	0.694551	protective	NA
KEGG_NEUROTROPHIN_SIGNALING_PATHWAY	REACTOME_ORGANELLE_BIOGENESIS_AND_MAINTENANCE	rs7033070	9	131586374	RAPGEF1	rs6961764	7	133131298	CHCHD3	recessive_dominant	0.124306	0.158713	1.43566	0.752444	protective	NA
KEGG_NEUROTROPHIN_SIGNALING_PATHWAY	REACTOME_ORGANELLE_BIOGENESIS_AND_MAINTENANCE	rs3844536	19	396948	SHC2	rs528424379	16	23661801	PLK1	dominant	0.0932297	0.124306	1.43511	0.724296	protective	NA
KEGG_NEUROTROPHIN_SIGNALING_PATHWAY	REACTOME_ORGANELLE_BIOGENESIS_AND_MAINTENANCE	rs201635960	5	180199887	MAPK9	rs4726122	7	151675463	PRKAG2	dominant	0.344062	0.388457	1.43411	0.825767	protective	NA
KEGG_NEUROTROPHIN_SIGNALING_PATHWAY	REACTOME_ORGANELLE_BIOGENESIS_AND_MAINTENANCE	rs4144887	6	166747512	RPS6KA2	rs2847251	18	12751036	CEP76	recessive_dominant	0.017758	0.036626	1.43326	0.475535	protective	NA
KEGG_NEUROTROPHIN_SIGNALING_PATHWAY	REACTOME_ORGANELLE_BIOGENESIS_AND_MAINTENANCE	rs2087072	1	243829549	AKT3	rs11429505	8	70278596	NCOA2	recessive_dominant	0.142064	0.176471	1.43221	0.772747	protective	NA
KEGG_NEUROTROPHIN_SIGNALING_PATHWAY	REACTOME_ORGANELLE_BIOGENESIS_AND_MAINTENANCE	rs55702801	14	73255495	PSEN1	rs7833836	8	17935642	PCM1	dominant	0.167592	0.207547	1.43195	0.768727	protective	NA
KEGG_NEUROTROPHIN_SIGNALING_PATHWAY	REACTOME_ORGANELLE_BIOGENESIS_AND_MAINTENANCE	rs200089036	19	38902723	NFKBIB	rs2655172	8	70154581	NCOA2	recessive_dominant	0.115427	0.149834	1.43148	0.740406	protective	NA
KEGG_NEUROTROPHIN_SIGNALING_PATHWAY	REACTOME_ORGANELLE_BIOGENESIS_AND_MAINTENANCE	rs2239798	6	36177857	MAPK13	rs3828282	2	218779144	PRKAG3	recessive	0.00443951	0.0155383	1.43104	0.282529	protective	NA
KEGG_NEUROTROPHIN_SIGNALING_PATHWAY	REACTOME_ORGANELLE_BIOGENESIS_AND_MAINTENANCE	rs1902716	10	48395086	MAPK8	rs4761574	12	94503883	CEP83	dominant	0.291898	0.335183	1.43095	0.817626	protective	NA
KEGG_NEUROTROPHIN_SIGNALING_PATHWAY	REACTOME_ORGANELLE_BIOGENESIS_AND_MAINTENANCE	rs9347129	6	166895934	RPS6KA2	rs17166570	5	132660439	KIF3A	dominant	0.0266371	0.0510544	1.43093	0.508651	protective	NA
KEGG_NEUROTROPHIN_SIGNALING_PATHWAY	REACTOME_ORGANELLE_BIOGENESIS_AND_MAINTENANCE	rs557328	19	7902965	MAP2K7	rs10812525	9	27084462	IFT74	dominant	0.308546	0.357381	1.43085	0.802379	protective	NA
KEGG_NEUROTROPHIN_SIGNALING_PATHWAY	REACTOME_ORGANELLE_BIOGENESIS_AND_MAINTENANCE	rs56002030	19	49073984	NTF4	rs34487560	4	56029268	CEP135	dominant	0.489456	0.536071	1.43039	0.829679	protective	NA
KEGG_NEUROTROPHIN_SIGNALING_PATHWAY	REACTOME_ORGANELLE_BIOGENESIS_AND_MAINTENANCE	rs11102837	1	115346655	NGF	rs57156634	11	103446048	DYNC2H1	recessive_dominant	0.0233074	0.0421754	1.42996	0.541956	protective	NA
KEGG_NEUROTROPHIN_SIGNALING_PATHWAY	REACTOME_ORGANELLE_BIOGENESIS_AND_MAINTENANCE	rs11063604	12	5408423	NTF3	rs2280545	11	204147	SIRT3	recessive_dominant	0.0110988	0.0266371	1.42985	0.41012	protective	NA
KEGG_NEUROTROPHIN_SIGNALING_PATHWAY	REACTOME_ORGANELLE_BIOGENESIS_AND_MAINTENANCE	rs8073151	17	1495834	CRK	rs2388229	16	53556997	RPGRIP1L	recessive_dominant	0.169811	0.208657	1.42938	0.77575	protective	NA
KEGG_NEUROTROPHIN_SIGNALING_PATHWAY	REACTOME_ORGANELLE_BIOGENESIS_AND_MAINTENANCE	rs529025836	17	63636272	MAP3K3	rs7438356	4	15624770	CC2D2A	recessive	0.0299667	0.0532741	1.42896	0.548985	protective	NA
KEGG_NEUROTROPHIN_SIGNALING_PATHWAY	REACTOME_ORGANELLE_BIOGENESIS_AND_MAINTENANCE	rs325923	1	111691513	RAP1A	rs37815	16	3455912	CLUAP1	recessive_dominant	0.0166482	0.0321865	1.42876	0.509068	protective	NA
KEGG_NEUROTROPHIN_SIGNALING_PATHWAY	REACTOME_ORGANELLE_BIOGENESIS_AND_MAINTENANCE	rs6916254	6	136738115	MAP3K5	rs6852518	4	39282858	WDR19	dominant	0.0210877	0.0388457	1.42851	0.533009	protective	NA
KEGG_NEUROTROPHIN_SIGNALING_PATHWAY	REACTOME_ORGANELLE_BIOGENESIS_AND_MAINTENANCE	rs2239798	6	36177857	MAPK13	rs12935211	16	58015332	CNGB1	recessive_dominant	0.0521643	0.0765816	1.428	0.663612	protective	NA
KEGG_NEUROTROPHIN_SIGNALING_PATHWAY	REACTOME_ORGANELLE_BIOGENESIS_AND_MAINTENANCE	rs1245510	10	73799959	CAMK2G	rs10421830	19	45210634	MARK4	dominant	0.245283	0.287458	1.42688	0.805598	protective	NA
KEGG_NEUROTROPHIN_SIGNALING_PATHWAY	REACTOME_ORGANELLE_BIOGENESIS_AND_MAINTENANCE	rs7805383	7	140908104	BRAF	rs4273371	3	108119071	IFT57	recessive_dominant	0.127636	0.164262	1.42604	0.744404	protective	NA
KEGG_NEUROTROPHIN_SIGNALING_PATHWAY	REACTOME_ORGANELLE_BIOGENESIS_AND_MAINTENANCE	rs11063604	12	5408423	NTF3	rs7833836	8	17935642	PCM1	recessive_dominant	0.0288568	0.0488346	1.42587	0.578753	protective	NA
KEGG_NEUROTROPHIN_SIGNALING_PATHWAY	REACTOME_ORGANELLE_BIOGENESIS_AND_MAINTENANCE	rs12228989	12	68593207	RAP1B	rs11287280	3	45836823	LZTFL1	recessive_dominant	0.00110988	0.0110988	1.42541	0.099	protective	NA
KEGG_NEUROTROPHIN_SIGNALING_PATHWAY	REACTOME_ORGANELLE_BIOGENESIS_AND_MAINTENANCE	rs2239798	6	36177857	MAPK13	rs201143490	9	136452021	INPP5E	dominant	0.176471	0.215316	1.42519	0.780928	protective	NA
KEGG_NEUROTROPHIN_SIGNALING_PATHWAY	REACTOME_ORGANELLE_BIOGENESIS_AND_MAINTENANCE	rs6916254	6	136738115	MAP3K5	rs277552	2	121632454	CLASP1	recessive_dominant	0.0266371	0.045505	1.42387	0.574019	protective	NA
KEGG_NEUROTROPHIN_SIGNALING_PATHWAY	REACTOME_ORGANELLE_BIOGENESIS_AND_MAINTENANCE	rs2803965	14	73098014	PSEN1	rs553512184	1	153989995	CRTC2	dominant	0.348502	0.394007	1.42382	0.822727	protective	NA
KEGG_NEUROTROPHIN_SIGNALING_PATHWAY	REACTOME_ORGANELLE_BIOGENESIS_AND_MAINTENANCE	rs9759629	4	113743604	CAMK2D	rs2489138	1	156526564	MEF2D	dominant	0.331853	0.382908	1.42372	0.800443	protective	NA
KEGG_NEUROTROPHIN_SIGNALING_PATHWAY	REACTOME_ORGANELLE_BIOGENESIS_AND_MAINTENANCE	rs6094276	20	44949946	YWHAB	rs10421830	19	45210634	MARK4	recessive	0.00332963	0.0133185	1.42324	0.247494	protective	NA
KEGG_NEUROTROPHIN_SIGNALING_PATHWAY	REACTOME_ORGANELLE_BIOGENESIS_AND_MAINTENANCE	rs76273626	18	63123969	BCL2	rs6701114	1	1022037	PERM1	recessive	0	0.00665927	1.42301	0	protective	NA
KEGG_NEUROTROPHIN_SIGNALING_PATHWAY	REACTOME_ORGANELLE_BIOGENESIS_AND_MAINTENANCE	rs545970	6	44239677	NFKBIE	rs113582339	7	151529654	PRKAG2	recessive_dominant	0.0144284	0.0299667	1.42272	0.473891	protective	NA
KEGG_NEUROTROPHIN_SIGNALING_PATHWAY	REACTOME_ORGANELLE_BIOGENESIS_AND_MAINTENANCE	rs7497619	15	49007401	SHC4	rs12933372	16	80566189	DYNLRB2	recessive_dominant	0.0144284	0.0299667	1.42227	0.473891	protective	NA
KEGG_NEUROTROPHIN_SIGNALING_PATHWAY	REACTOME_ORGANELLE_BIOGENESIS_AND_MAINTENANCE	rs55702801	14	73255495	PSEN1	rs12935211	16	58015332	CNGB1	dominant	0.169811	0.209767	1.42137	0.770563	protective	NA
KEGG_NEUROTROPHIN_SIGNALING_PATHWAY	REACTOME_ORGANELLE_BIOGENESIS_AND_MAINTENANCE	rs139443871	19	4165336	MAP2K2	rs142436966	2	74351590	DCTN1	recessive_dominant	0.0788013	0.108768	1.42131	0.700922	protective	NA
KEGG_NEUROTROPHIN_SIGNALING_PATHWAY	REACTOME_ORGANELLE_BIOGENESIS_AND_MAINTENANCE	rs2803965	14	73098014	PSEN1	rs56071638	16	53234175	CHD9	recessive_dominant	0.054384	0.0799112	1.42021	0.662184	protective	NA
KEGG_NEUROTROPHIN_SIGNALING_PATHWAY	REACTOME_ORGANELLE_BIOGENESIS_AND_MAINTENANCE	rs7805383	7	140908104	BRAF	rs890980	5	477303	EXOC3	recessive_dominant	0.144284	0.18202	1.42021	0.757727	protective	NA
KEGG_NEUROTROPHIN_SIGNALING_PATHWAY	REACTOME_ORGANELLE_BIOGENESIS_AND_MAINTENANCE	rs55702801	14	73255495	PSEN1	rs3806410	1	156337134	CCT3	dominant	0.122087	0.158713	1.41964	0.737139	protective	NA
KEGG_NEUROTROPHIN_SIGNALING_PATHWAY	REACTOME_ORGANELLE_BIOGENESIS_AND_MAINTENANCE	rs11063604	12	5408423	NTF3	rs1821526	12	94388174	CEP83	recessive_dominant	0.0233074	0.0421754	1.41961	0.541956	protective	0.024
KEGG_NEUROTROPHIN_SIGNALING_PATHWAY	REACTOME_ORGANELLE_BIOGENESIS_AND_MAINTENANCE	rs11063604	12	5408423	NTF3	rs1611011	13	20695628	IFT88	recessive_dominant	0.0233074	0.0421754	1.41961	0.541956	protective	NA
KEGG_NEUROTROPHIN_SIGNALING_PATHWAY	REACTOME_ORGANELLE_BIOGENESIS_AND_MAINTENANCE	rs7222654	17	8932404	PIK3R5	rs6593798	1	147135704	PRKAB2	dominant	0.133185	0.167592	1.41961	0.763158	protective	NA
KEGG_NEUROTROPHIN_SIGNALING_PATHWAY	REACTOME_ORGANELLE_BIOGENESIS_AND_MAINTENANCE	rs12425324	12	111407697	SH2B3	rs6464184	7	151625412	PRKAG2	recessive_dominant	0.0987791	0.129856	1.41913	0.734453	protective	NA
KEGG_NEUROTROPHIN_SIGNALING_PATHWAY	REACTOME_ORGANELLE_BIOGENESIS_AND_MAINTENANCE	rs4791329	17	7693455	TP53	rs2234182	19	6535080	TUBB4A	recessive_dominant	0.0743618	0.103219	1.41872	0.697971	protective	NA
KEGG_NEUROTROPHIN_SIGNALING_PATHWAY	REACTOME_ORGANELLE_BIOGENESIS_AND_MAINTENANCE	rs2803965	14	73098014	PSEN1	rs533119830	22	40656205	MCHR1	dominant	0.297447	0.341842	1.41741	0.815145	protective	NA
KEGG_NEUROTROPHIN_SIGNALING_PATHWAY	REACTOME_ORGANELLE_BIOGENESIS_AND_MAINTENANCE	rs3844536	19	396948	SHC2	rs12761305	10	92814031	EXOC6	dominant	0.389567	0.435072	1.41734	0.82866	protective	NA
KEGG_NEUROTROPHIN_SIGNALING_PATHWAY	REACTOME_ORGANELLE_BIOGENESIS_AND_MAINTENANCE	rs2908290	7	44216137	CAMK2B	rs9678422	2	169532214	BBS5	recessive_dominant	0.0133185	0.0299667	1.41655	0.436945	protective	NA
KEGG_NEUROTROPHIN_SIGNALING_PATHWAY	REACTOME_ORGANELLE_BIOGENESIS_AND_MAINTENANCE	rs325923	1	111691513	RAP1A	rs7438356	4	15624770	CC2D2A	recessive_dominant	0.107658	0.139845	1.41547	0.742073	protective	NA
KEGG_NEUROTROPHIN_SIGNALING_PATHWAY	REACTOME_ORGANELLE_BIOGENESIS_AND_MAINTENANCE	rs4877972	9	88989455	SHC3	rs7804751	7	151645370	PRKAG2	recessive_dominant	0.160932	0.198668	1.41458	0.773625	protective	NA
KEGG_NEUROTROPHIN_SIGNALING_PATHWAY	REACTOME_ORGANELLE_BIOGENESIS_AND_MAINTENANCE	rs55967668	5	68241438	PIK3R1	rs4531944	2	166001810	TTC21B	recessive	0.00110988	0.00887902	1.41347	0.124028	protective	NA
KEGG_NEUROTROPHIN_SIGNALING_PATHWAY	REACTOME_ORGANELLE_BIOGENESIS_AND_MAINTENANCE	rs7497619	15	49007401	SHC4	rs7562959	2	121577641	CLASP1	recessive_dominant	0.00110988	0.00887902	1.41347	0.124028	protective	NA
KEGG_NEUROTROPHIN_SIGNALING_PATHWAY	REACTOME_ORGANELLE_BIOGENESIS_AND_MAINTENANCE	rs6916254	6	136738115	MAP3K5	rs34144731	4	55921913	CEP135/EXOC1	recessive_dominant	0.00110988	0.00887902	1.41347	0.124028	protective	NA
KEGG_NEUROTROPHIN_SIGNALING_PATHWAY	REACTOME_ORGANELLE_BIOGENESIS_AND_MAINTENANCE	rs8073151	17	1495834	CRK	rs200502024	3	121820354	IQCB1	recessive	0.00332963	0.0155383	1.41294	0.211661	protective	NA
KEGG_NEUROTROPHIN_SIGNALING_PATHWAY	REACTOME_ORGANELLE_BIOGENESIS_AND_MAINTENANCE	rs13322072	3	179282730	PIK3CA	rs200502024	3	121820354	IQCB1	recessive	0.00332963	0.0155383	1.41294	0.211661	protective	0.007
KEGG_NEUROTROPHIN_SIGNALING_PATHWAY	REACTOME_ORGANELLE_BIOGENESIS_AND_MAINTENANCE	rs9759629	4	113743604	CAMK2D	rs7798741	7	33585000	BBS9	dominant	0.408435	0.45838	1.4127	0.815813	protective	NA
KEGG_NEUROTROPHIN_SIGNALING_PATHWAY	REACTOME_ORGANELLE_BIOGENESIS_AND_MAINTENANCE	rs28574697	19	48959488	BAX	rs4329481	1	20658089	KIF17	recessive_dominant	0.0155383	0.0321865	1.41239	0.474595	protective	NA
KEGG_NEUROTROPHIN_SIGNALING_PATHWAY	REACTOME_ORGANELLE_BIOGENESIS_AND_MAINTENANCE	rs7805383	7	140908104	BRAF	rs9329423	1	5828193	NPHP4	recessive_dominant	0.082131	0.114317	1.41155	0.693253	protective	NA
KEGG_NEUROTROPHIN_SIGNALING_PATHWAY	REACTOME_ORGANELLE_BIOGENESIS_AND_MAINTENANCE	rs62315570	4	86331750	MAPK10	rs890980	5	477303	EXOC3	recessive_dominant	0.145394	0.18202	1.4113	0.764547	protective	NA
KEGG_NEUROTROPHIN_SIGNALING_PATHWAY	REACTOME_ORGANELLE_BIOGENESIS_AND_MAINTENANCE	rs13322072	3	179282730	PIK3CA	rs6751305	2	61876220	CCT4	dominant	0.423973	0.475028	1.41112	0.813417	protective	NA
KEGG_NEUROTROPHIN_SIGNALING_PATHWAY	REACTOME_ORGANELLE_BIOGENESIS_AND_MAINTENANCE	rs8073151	17	1495834	CRK	rs10077397	5	88903298	MEF2C	recessive	0.0166482	0.0344062	1.41105	0.475133	protective	NA
KEGG_NEUROTROPHIN_SIGNALING_PATHWAY	REACTOME_ORGANELLE_BIOGENESIS_AND_MAINTENANCE	rs2087072	1	243829549	AKT3	rs11707509	3	196346629	TCTEX1D2	recessive	0.0122087	0.0288568	1.41019	0.415946	protective	NA
KEGG_NEUROTROPHIN_SIGNALING_PATHWAY	REACTOME_ORGANELLE_BIOGENESIS_AND_MAINTENANCE	rs2169633	15	66467291	MAP2K1	rs12761305	10	92814031	EXOC6	dominant	0.36404	0.409545	1.4098	0.825286	protective	NA
KEGG_NEUROTROPHIN_SIGNALING_PATHWAY	REACTOME_ORGANELLE_BIOGENESIS_AND_MAINTENANCE	rs10806852	6	166864334	RPS6KA2	rs6961764	7	133131298	CHCHD3	recessive_dominant	0.0566038	0.082131	1.40867	0.670541	protective	NA
KEGG_NEUROTROPHIN_SIGNALING_PATHWAY	REACTOME_ORGANELLE_BIOGENESIS_AND_MAINTENANCE	rs2908290	7	44216137	CAMK2B	rs12819938	12	119702178	PRKAB1	recessive_dominant	0.162042	0.200888	1.40839	0.769236	protective	NA
KEGG_NEUROTROPHIN_SIGNALING_PATHWAY	REACTOME_ORGANELLE_BIOGENESIS_AND_MAINTENANCE	rs2075076	7	44274642	CAMK2B	rs73054883	19	52207932	PPP2R1A	recessive_dominant	0.00110988	0.0099889	1.40737	0.110123	protective	NA
KEGG_NEUROTROPHIN_SIGNALING_PATHWAY	REACTOME_ORGANELLE_BIOGENESIS_AND_MAINTENANCE	rs2908290	7	44216137	CAMK2B	rs56071638	16	53234175	CHD9	dominant	0.469478	0.522752	1.40733	0.807904	protective	NA
KEGG_NEUROTROPHIN_SIGNALING_PATHWAY	REACTOME_ORGANELLE_BIOGENESIS_AND_MAINTENANCE	rs2087072	1	243829549	AKT3	rs113230548	2	231791498	PDE6D	recessive_dominant	0.00443951	0.0155383	1.40598	0.282529	protective	NA
KEGG_NEUROTROPHIN_SIGNALING_PATHWAY	REACTOME_ORGANELLE_BIOGENESIS_AND_MAINTENANCE	rs7222654	17	8932404	PIK3R5	rs13061728	3	97786914	ARL6	recessive_dominant	0.0266371	0.0443951	1.40554	0.589054	protective	NA
KEGG_NEUROTROPHIN_SIGNALING_PATHWAY	REACTOME_ORGANELLE_BIOGENESIS_AND_MAINTENANCE	rs7398141	12	69475910	FRS2	rs34144731	4	55921913	CEP135/EXOC1	recessive_dominant	0.00554939	0.0199778	1.40553	0.273748	protective	NA
KEGG_NEUROTROPHIN_SIGNALING_PATHWAY	REACTOME_ORGANELLE_BIOGENESIS_AND_MAINTENANCE	rs139443871	19	4165336	MAP2K2	rs201143490	9	136452021	INPP5E	recessive_dominant	0.0765816	0.106548	1.405	0.695425	protective	NA
KEGG_NEUROTROPHIN_SIGNALING_PATHWAY	REACTOME_ORGANELLE_BIOGENESIS_AND_MAINTENANCE	rs12337518	9	84884971	NTRK2	rs6855480	4	23747576	PPARGC1A	dominant	0.0233074	0.0421754	1.40378	0.541956	protective	NA
KEGG_NEUROTROPHIN_SIGNALING_PATHWAY	REACTOME_ORGANELLE_BIOGENESIS_AND_MAINTENANCE	rs68104879	17	8896949	PIK3R5	rs10460000	18	12320551	TUBB6	recessive_dominant	0.0588235	0.0865705	1.40351	0.659455	protective	NA
KEGG_NEUROTROPHIN_SIGNALING_PATHWAY	REACTOME_ORGANELLE_BIOGENESIS_AND_MAINTENANCE	rs55967668	5	68241438	PIK3R1	rs7833836	8	17935642	PCM1	dominant	0.188679	0.226415	1.40346	0.794574	protective	NA
KEGG_NEUROTROPHIN_SIGNALING_PATHWAY	REACTOME_ORGANELLE_BIOGENESIS_AND_MAINTENANCE	rs7222654	17	8932404	PIK3R5	rs10232215	7	92097166	AKAP9	recessive_dominant	0.0199778	0.036626	1.40314	0.536189	protective	NA
KEGG_NEUROTROPHIN_SIGNALING_PATHWAY	REACTOME_ORGANELLE_BIOGENESIS_AND_MAINTENANCE	rs56002030	19	49073984	NTF4	rs6593798	1	147135704	PRKAB2	dominant	0.280799	0.324084	1.4027	0.814292	protective	NA
KEGG_NEUROTROPHIN_SIGNALING_PATHWAY	REACTOME_ORGANELLE_BIOGENESIS_AND_MAINTENANCE	rs557328	19	7902965	MAP2K7	rs74183366	19	35674986	HAUS5	dominant	0.285239	0.332963	1.40132	0.799467	protective	0.001
KEGG_NEUROTROPHIN_SIGNALING_PATHWAY	REACTOME_ORGANELLE_BIOGENESIS_AND_MAINTENANCE	rs2803965	14	73098014	PSEN1	rs7626359	3	126796501	CHCHD6	dominant	0.237514	0.279689	1.40095	0.802234	protective	NA
KEGG_NEUROTROPHIN_SIGNALING_PATHWAY	REACTOME_ORGANELLE_BIOGENESIS_AND_MAINTENANCE	rs9347129	6	166895934	RPS6KA2	rs890980	5	477303	EXOC3	recessive_dominant	0.0221976	0.0344062	1.40093	0.637106	protective	NA
KEGG_NEUROTROPHIN_SIGNALING_PATHWAY	REACTOME_ORGANELLE_BIOGENESIS_AND_MAINTENANCE	rs6916254	6	136738115	MAP3K5	rs201143490	9	136452021	INPP5E	dominant	0.119867	0.154273	1.40089	0.746605	protective	NA
KEGG_NEUROTROPHIN_SIGNALING_PATHWAY	REACTOME_ORGANELLE_BIOGENESIS_AND_MAINTENANCE	rs2239798	6	36177857	MAPK13	rs612700	11	74127339	C2CD3	recessive_dominant	0.0233074	0.0410655	1.40074	0.557248	protective	NA
KEGG_NEUROTROPHIN_SIGNALING_PATHWAY	REACTOME_ORGANELLE_BIOGENESIS_AND_MAINTENANCE	rs34137352	1	3694480	TP73	rs201143490	9	136452021	INPP5E	dominant	0.0965594	0.128746	1.40042	0.72328	protective	NA
KEGG_NEUROTROPHIN_SIGNALING_PATHWAY	REACTOME_ORGANELLE_BIOGENESIS_AND_MAINTENANCE	rs111530414	5	56815966	MAP3K1	rs2130923	4	23781504	PPARGC1A	recessive_dominant	0.00221976	0.0110988	1.39976	0.19822	protective	NA
KEGG_NEUROTROPHIN_SIGNALING_PATHWAY	REACTOME_ORGANELLE_BIOGENESIS_AND_MAINTENANCE	rs7805383	7	140908104	BRAF	rs12935211	16	58015332	CNGB1	dominant	0.439512	0.488346	1.39954	0.821584	protective	NA
KEGG_NEUROTROPHIN_SIGNALING_PATHWAY	REACTOME_ORGANELLE_BIOGENESIS_AND_MAINTENANCE	rs3844536	19	396948	SHC2	rs10883462	10	102095122	PPRC1	recessive_dominant	0.108768	0.140954	1.39949	0.743786	protective	NA
KEGG_NEUROTROPHIN_SIGNALING_PATHWAY	REACTOME_ORGANELLE_BIOGENESIS_AND_MAINTENANCE	rs11102837	1	115346655	NGF	rs7247709	19	52240015	PPP2R1A	recessive_dominant	0.0987791	0.134295	1.39895	0.706551	protective	NA
KEGG_NEUROTROPHIN_SIGNALING_PATHWAY	REACTOME_ORGANELLE_BIOGENESIS_AND_MAINTENANCE	rs2612043	12	66183500	IRAK3	rs979802	11	103388805	DYNC2H1	recessive_dominant	0.0377358	0.0621532	1.39866	0.591737	protective	NA
KEGG_NEUROTROPHIN_SIGNALING_PATHWAY	REACTOME_ORGANELLE_BIOGENESIS_AND_MAINTENANCE	rs139443871	19	4165336	MAP2K2	rs2847251	18	12751036	CEP76	recessive_dominant	0.0377358	0.0566038	1.39858	0.653595	protective	NA
KEGG_NEUROTROPHIN_SIGNALING_PATHWAY	REACTOME_ORGANELLE_BIOGENESIS_AND_MAINTENANCE	rs10806852	6	166864334	RPS6KA2	rs9348164	6	167071948	FGFR1OP	recessive	0.00221976	0.0110988	1.39851	0.19822	protective	7.479e-04
KEGG_NEUROTROPHIN_SIGNALING_PATHWAY	REACTOME_ORGANELLE_BIOGENESIS_AND_MAINTENANCE	rs17051913	9	89061524	SHC3	rs7943261	11	95767956	CEP57	dominant	0.0976693	0.128746	1.39837	0.732494	protective	NA
KEGG_NEUROTROPHIN_SIGNALING_PATHWAY	REACTOME_ORGANELLE_BIOGENESIS_AND_MAINTENANCE	rs6072793	20	41185524	PLCG1	rs6534321	4	122692023	BBS12	recessive_dominant	0.0199778	0.0377358	1.39826	0.519819	protective	NA
KEGG_NEUROTROPHIN_SIGNALING_PATHWAY	REACTOME_ORGANELLE_BIOGENESIS_AND_MAINTENANCE	rs8073151	17	1495834	CRK	rs7247709	19	52240015	PPP2R1A	dominant	0.489456	0.54162	1.39802	0.811355	protective	NA
KEGG_NEUROTROPHIN_SIGNALING_PATHWAY	REACTOME_ORGANELLE_BIOGENESIS_AND_MAINTENANCE	rs4877972	9	88989455	SHC3	rs142436966	2	74351590	DCTN1	dominant	0.36182	0.417314	1.39775	0.791628	protective	NA
KEGG_NEUROTROPHIN_SIGNALING_PATHWAY	REACTOME_ORGANELLE_BIOGENESIS_AND_MAINTENANCE	rs3128321	1	1953252	CALML6	rs9409189	9	120382927	CDK5RAP2	recessive	0.00554939	0.017758	1.3976	0.308664	protective	NA
KEGG_NEUROTROPHIN_SIGNALING_PATHWAY	REACTOME_ORGANELLE_BIOGENESIS_AND_MAINTENANCE	rs13322072	3	179282730	PIK3CA	rs10779788	1	5945990	NPHP4	dominant	0.3596	0.409545	1.39673	0.80957	protective	NA
KEGG_NEUROTROPHIN_SIGNALING_PATHWAY	REACTOME_ORGANELLE_BIOGENESIS_AND_MAINTENANCE	rs7805383	7	140908104	BRAF	rs376270	16	57950057	CNGB1	recessive_dominant	0.132075	0.168701	1.39608	0.749857	protective	NA
KEGG_NEUROTROPHIN_SIGNALING_PATHWAY	REACTOME_ORGANELLE_BIOGENESIS_AND_MAINTENANCE	rs7522448	1	109279791	SORT1	rs890980	5	477303	EXOC3	recessive_dominant	0.107658	0.142064	1.39496	0.728593	protective	NA
KEGG_NEUROTROPHIN_SIGNALING_PATHWAY	REACTOME_ORGANELLE_BIOGENESIS_AND_MAINTENANCE	rs56002030	19	49073984	NTF4	rs11168720	12	49146750	TUBA1A/TUBA1B	dominant	0.392897	0.438402	1.39382	0.829028	protective	NA
KEGG_NEUROTROPHIN_SIGNALING_PATHWAY	REACTOME_ORGANELLE_BIOGENESIS_AND_MAINTENANCE	rs4877972	9	88989455	SHC3	rs12935211	16	58015332	CNGB1	dominant	0.410655	0.45616	1.39337	0.830733	protective	NA
KEGG_NEUROTROPHIN_SIGNALING_PATHWAY	REACTOME_ORGANELLE_BIOGENESIS_AND_MAINTENANCE	rs55702801	14	73255495	PSEN1	rs10883462	10	102095122	PPRC1	recessive_dominant	0.0144284	0.0233074	1.39322	0.613471	protective	NA
KEGG_NEUROTROPHIN_SIGNALING_PATHWAY	REACTOME_ORGANELLE_BIOGENESIS_AND_MAINTENANCE	rs7805383	7	140908104	BRAF	rs4726122	7	151675463	PRKAG2	dominant	0.412875	0.45727	1.39285	0.834639	protective	0.003
KEGG_NEUROTROPHIN_SIGNALING_PATHWAY	REACTOME_ORGANELLE_BIOGENESIS_AND_MAINTENANCE	rs3861824	1	58807217	JUN	rs200502024	3	121820354	IQCB1	dominant	0.0432852	0.0665927	1.39242	0.634165	protective	NA
KEGG_NEUROTROPHIN_SIGNALING_PATHWAY	REACTOME_ORGANELLE_BIOGENESIS_AND_MAINTENANCE	rs998521	15	66407072	MAP2K1	rs71626264	3	177098521	TBL1XR1	dominant	0.208657	0.258602	1.39225	0.755943	protective	NA
KEGG_NEUROTROPHIN_SIGNALING_PATHWAY	REACTOME_ORGANELLE_BIOGENESIS_AND_MAINTENANCE	rs2908290	7	44216137	CAMK2B	rs71626264	3	177098521	TBL1XR1	dominant	0.407325	0.45394	1.39093	0.826736	protective	NA
KEGG_NEUROTROPHIN_SIGNALING_PATHWAY	REACTOME_ORGANELLE_BIOGENESIS_AND_MAINTENANCE	rs139443871	19	4165336	MAP2K2	rs2072826	6	135253558	AHI1	recessive_dominant	0.045505	0.0677026	1.39014	0.6565	protective	NA
KEGG_NEUROTROPHIN_SIGNALING_PATHWAY	REACTOME_ORGANELLE_BIOGENESIS_AND_MAINTENANCE	rs11102837	1	115346655	NGF	rs10077397	5	88903298	MEF2C	recessive_dominant	0.063263	0.0887902	1.39004	0.693084	protective	NA
KEGG_NEUROTROPHIN_SIGNALING_PATHWAY	REACTOME_ORGANELLE_BIOGENESIS_AND_MAINTENANCE	rs3861824	1	58807217	JUN	rs7438356	4	15624770	CC2D2A	dominant	0.107658	0.138735	1.38949	0.748975	protective	NA
KEGG_NEUROTROPHIN_SIGNALING_PATHWAY	REACTOME_ORGANELLE_BIOGENESIS_AND_MAINTENANCE	rs529025836	17	63636272	MAP3K3	rs113582339	7	151529654	PRKAG2	recessive_dominant	0.0221976	0.0410655	1.38939	0.53011	protective	NA
KEGG_NEUROTROPHIN_SIGNALING_PATHWAY	REACTOME_ORGANELLE_BIOGENESIS_AND_MAINTENANCE	rs71166958	19	4089029	MAP2K2	rs1611011	13	20695628	IFT88	recessive_dominant	0.0355161	0.0577137	1.38928	0.601222	protective	NA
KEGG_NEUROTROPHIN_SIGNALING_PATHWAY	REACTOME_ORGANELLE_BIOGENESIS_AND_MAINTENANCE	rs9759629	4	113743604	CAMK2D	rs11668155	19	52247306	PPP2R1A	dominant	0.277469	0.319645	1.38914	0.817386	protective	NA
KEGG_NEUROTROPHIN_SIGNALING_PATHWAY	REACTOME_ORGANELLE_BIOGENESIS_AND_MAINTENANCE	rs2908290	7	44216137	CAMK2B	rs7438356	4	15624770	CC2D2A	dominant	0.413984	0.460599	1.38819	0.8273	protective	NA
KEGG_NEUROTROPHIN_SIGNALING_PATHWAY	REACTOME_ORGANELLE_BIOGENESIS_AND_MAINTENANCE	rs2169633	15	66467291	MAP2K1	rs11144552	9	78262765	CEP78	recessive_dominant	0.0244173	0.0432852	1.38753	0.553193	protective	NA
KEGG_NEUROTROPHIN_SIGNALING_PATHWAY	REACTOME_ORGANELLE_BIOGENESIS_AND_MAINTENANCE	rs13322072	3	179282730	PIK3CA	rs12761305	10	92814031	EXOC6	dominant	0.36737	0.417314	1.38729	0.81082	protective	NA
KEGG_NEUROTROPHIN_SIGNALING_PATHWAY	REACTOME_ORGANELLE_BIOGENESIS_AND_MAINTENANCE	rs12950747	17	8996860	PIK3R5	rs235301	21	46297256	PCNT	recessive_dominant	0.00443951	0.0155383	1.38717	0.282529	protective	NA
KEGG_NEUROTROPHIN_SIGNALING_PATHWAY	REACTOME_ORGANELLE_BIOGENESIS_AND_MAINTENANCE	rs2224949	14	50096560	SOS2	rs201143490	9	136452021	INPP5E	dominant	0.301887	0.345172	1.38633	0.82037	protective	NA
KEGG_NEUROTROPHIN_SIGNALING_PATHWAY	REACTOME_ORGANELLE_BIOGENESIS_AND_MAINTENANCE	rs7398141	12	69475910	FRS2	rs3913673	6	159777567	TCP1	recessive_dominant	0	0.00887902	1.38594	0	protective	NA
KEGG_NEUROTROPHIN_SIGNALING_PATHWAY	REACTOME_ORGANELLE_BIOGENESIS_AND_MAINTENANCE	rs55894401	16	81730962	PLCG2	rs7247709	19	52240015	PPP2R1A	dominant	0.338513	0.386238	1.38536	0.813204	protective	NA
KEGG_NEUROTROPHIN_SIGNALING_PATHWAY	REACTOME_ORGANELLE_BIOGENESIS_AND_MAINTENANCE	rs3844536	19	396948	SHC2	rs6432044	2	10041284	CYS1	dominant	0.3596	0.403996	1.38499	0.828404	protective	NA
KEGG_NEUROTROPHIN_SIGNALING_PATHWAY	REACTOME_ORGANELLE_BIOGENESIS_AND_MAINTENANCE	rs2908290	7	44216137	CAMK2B	rs34487560	4	56029268	CEP135	dominant	0.425083	0.471698	1.38454	0.828108	protective	NA
KEGG_NEUROTROPHIN_SIGNALING_PATHWAY	REACTOME_ORGANELLE_BIOGENESIS_AND_MAINTENANCE	rs66508783	19	18115826	PIK3R2	rs6855480	4	23747576	PPARGC1A	recessive_dominant	0.0133185	0.0277469	1.38451	0.472981	protective	NA
KEGG_NEUROTROPHIN_SIGNALING_PATHWAY	REACTOME_ORGANELLE_BIOGENESIS_AND_MAINTENANCE	rs1245510	10	73799959	CAMK2G	rs4959880	6	442206	EXOC2	dominant	0.330744	0.377358	1.38436	0.815423	protective	NA
KEGG_NEUROTROPHIN_SIGNALING_PATHWAY	REACTOME_ORGANELLE_BIOGENESIS_AND_MAINTENANCE	rs6916254	6	136738115	MAP3K5	rs28716841	5	132733467	KIF3A	dominant	0.0122087	0.0288568	1.38419	0.415946	protective	NA
KEGG_NEUROTROPHIN_SIGNALING_PATHWAY	REACTOME_ORGANELLE_BIOGENESIS_AND_MAINTENANCE	rs6916254	6	136738115	MAP3K5	rs528424379	16	23661801	PLK1	dominant	0.0410655	0.063263	1.38349	0.634097	protective	NA
KEGG_NEUROTROPHIN_SIGNALING_PATHWAY	REACTOME_ORGANELLE_BIOGENESIS_AND_MAINTENANCE	rs7805383	7	140908104	BRAF	rs6961764	7	133131298	CHCHD3	recessive_dominant	0.137625	0.172031	1.38341	0.768082	protective	5.561e-04
KEGG_NEUROTROPHIN_SIGNALING_PATHWAY	REACTOME_ORGANELLE_BIOGENESIS_AND_MAINTENANCE	rs139443871	19	4165336	MAP2K2	rs74114353	10	5359473	TUBAL3	recessive_dominant	0.0144284	0.0321865	1.38339	0.440199	protective	NA
KEGG_NEUROTROPHIN_SIGNALING_PATHWAY	REACTOME_ORGANELLE_BIOGENESIS_AND_MAINTENANCE	rs10413331	19	58203728	ZNF274	rs979802	11	103388805	DYNC2H1	recessive_dominant	0.0510544	0.0743618	1.38214	0.669704	protective	NA
KEGG_NEUROTROPHIN_SIGNALING_PATHWAY	REACTOME_ORGANELLE_BIOGENESIS_AND_MAINTENANCE	rs7805383	7	140908104	BRAF	rs7177165	15	90632720	CRTC3	recessive_dominant	0.0965594	0.134295	1.38125	0.688976	protective	NA
KEGG_NEUROTROPHIN_SIGNALING_PATHWAY	REACTOME_ORGANELLE_BIOGENESIS_AND_MAINTENANCE	rs55967668	5	68241438	PIK3R1	rs979802	11	103388805	DYNC2H1	dominant	0.17869	0.216426	1.38107	0.787706	protective	NA
KEGG_NEUROTROPHIN_SIGNALING_PATHWAY	REACTOME_ORGANELLE_BIOGENESIS_AND_MAINTENANCE	rs2239798	6	36177857	MAPK13	rs6593798	1	147135704	PRKAB2	recessive_dominant	0.0110988	0.0255272	1.38106	0.428439	protective	NA
KEGG_NEUROTROPHIN_SIGNALING_PATHWAY	REACTOME_ORGANELLE_BIOGENESIS_AND_MAINTENANCE	rs2803965	14	73098014	PSEN1	rs7833836	8	17935642	PCM1	dominant	0.326304	0.370699	1.38033	0.822234	protective	NA
KEGG_NEUROTROPHIN_SIGNALING_PATHWAY	REACTOME_ORGANELLE_BIOGENESIS_AND_MAINTENANCE	rs7805383	7	140908104	BRAF	rs12679073	8	130222310	ASAP1	recessive_dominant	0.119867	0.155383	1.3802	0.740299	protective	NA
KEGG_NEUROTROPHIN_SIGNALING_PATHWAY	REACTOME_ORGANELLE_BIOGENESIS_AND_MAINTENANCE	rs7482257	11	27755298	BDNF	rs200502024	3	121820354	IQCB1	recessive_dominant	0.00776915	0.0221976	1.37999	0.344911	protective	NA
KEGG_NEUROTROPHIN_SIGNALING_PATHWAY	REACTOME_ORGANELLE_BIOGENESIS_AND_MAINTENANCE	rs11063604	12	5408423	NTF3	rs9409189	9	120382927	CDK5RAP2	recessive_dominant	0.0288568	0.0499445	1.37992	0.565232	protective	NA
KEGG_NEUROTROPHIN_SIGNALING_PATHWAY	REACTOME_ORGANELLE_BIOGENESIS_AND_MAINTENANCE	rs17051913	9	89061524	SHC3	rs4917904	10	102447292	ACTR1A	recessive_dominant	0.0221976	0.0410655	1.37935	0.53011	protective	NA
KEGG_NEUROTROPHIN_SIGNALING_PATHWAY	REACTOME_ORGANELLE_BIOGENESIS_AND_MAINTENANCE	rs139443871	19	4165336	MAP2K2	rs1015410	7	107134828	PRKAR2B	recessive_dominant	0.105438	0.138735	1.37931	0.731712	protective	NA
KEGG_NEUROTROPHIN_SIGNALING_PATHWAY	REACTOME_ORGANELLE_BIOGENESIS_AND_MAINTENANCE	rs55967668	5	68241438	PIK3R1	rs2280545	11	204147	SIRT3	dominant	0.0621532	0.0887902	1.37916	0.680118	protective	NA
KEGG_NEUROTROPHIN_SIGNALING_PATHWAY	REACTOME_ORGANELLE_BIOGENESIS_AND_MAINTENANCE	rs1902716	10	48395086	MAPK8	rs2072826	6	135253558	AHI1	dominant	0.170921	0.208657	1.37905	0.781865	protective	NA
KEGG_NEUROTROPHIN_SIGNALING_PATHWAY	REACTOME_ORGANELLE_BIOGENESIS_AND_MAINTENANCE	rs2239798	6	36177857	MAPK13	rs10402773	19	33004535	CEP89	dominant	0.228635	0.27303	1.37888	0.789203	protective	NA
KEGG_NEUROTROPHIN_SIGNALING_PATHWAY	REACTOME_ORGANELLE_BIOGENESIS_AND_MAINTENANCE	rs7497619	15	49007401	SHC4	rs37815	16	3455912	CLUAP1	recessive_dominant	0.00776915	0.0199778	1.37821	0.384104	protective	NA
KEGG_NEUROTROPHIN_SIGNALING_PATHWAY	REACTOME_ORGANELLE_BIOGENESIS_AND_MAINTENANCE	rs2087072	1	243829549	AKT3	rs1396893	8	55779322	TGS1	recessive_dominant	0.107658	0.138735	1.37803	0.748975	protective	NA
KEGG_NEUROTROPHIN_SIGNALING_PATHWAY	REACTOME_ORGANELLE_BIOGENESIS_AND_MAINTENANCE	rs12425324	12	111407697	SH2B3	rs2072826	6	135253558	AHI1	recessive_dominant	0.0932297	0.123196	1.37794	0.731748	protective	NA
KEGG_NEUROTROPHIN_SIGNALING_PATHWAY	REACTOME_ORGANELLE_BIOGENESIS_AND_MAINTENANCE	rs55967668	5	68241438	PIK3R1	rs12679073	8	130222310	ASAP1	dominant	0.149834	0.18535	1.37765	0.774613	protective	NA
KEGG_NEUROTROPHIN_SIGNALING_PATHWAY	REACTOME_ORGANELLE_BIOGENESIS_AND_MAINTENANCE	rs10772805	12	14912466	ARHGDIB	rs6593798	1	147135704	PRKAB2	recessive_dominant	0.0377358	0.0554939	1.37735	0.667451	protective	NA
KEGG_NEUROTROPHIN_SIGNALING_PATHWAY	REACTOME_ORGANELLE_BIOGENESIS_AND_MAINTENANCE	rs6094276	20	44949946	YWHAB	rs12935211	16	58015332	CNGB1	recessive	0.0166482	0.0321865	1.37702	0.509068	protective	NA
KEGG_NEUROTROPHIN_SIGNALING_PATHWAY	REACTOME_ORGANELLE_BIOGENESIS_AND_MAINTENANCE	rs56002030	19	49073984	NTF4	rs6432044	2	10041284	CYS1	dominant	0.437292	0.482797	1.37699	0.832501	protective	NA
KEGG_NEUROTROPHIN_SIGNALING_PATHWAY	REACTOME_ORGANELLE_BIOGENESIS_AND_MAINTENANCE	rs12070845	1	109261850	SORT1	rs58183008	19	14155328	PRKACA	recessive_dominant	0	0.00665927	1.37647	0	protective	NA
KEGG_NEUROTROPHIN_SIGNALING_PATHWAY	REACTOME_ORGANELLE_BIOGENESIS_AND_MAINTENANCE	rs55702801	14	73255495	PSEN1	rs2388229	16	53556997	RPGRIP1L	dominant	0.1798	0.219756	1.37646	0.778325	protective	NA
KEGG_NEUROTROPHIN_SIGNALING_PATHWAY	REACTOME_ORGANELLE_BIOGENESIS_AND_MAINTENANCE	rs201635960	5	180199887	MAPK9	rs6751305	2	61876220	CCT4	dominant	0.386238	0.430633	1.37581	0.832031	protective	NA
KEGG_NEUROTROPHIN_SIGNALING_PATHWAY	REACTOME_ORGANELLE_BIOGENESIS_AND_MAINTENANCE	rs11102837	1	115346655	NGF	rs37815	16	3455912	CLUAP1	dominant	0.186459	0.224195	1.37577	0.793106	protective	NA
KEGG_NEUROTROPHIN_SIGNALING_PATHWAY	REACTOME_ORGANELLE_BIOGENESIS_AND_MAINTENANCE	rs7222654	17	8932404	PIK3R5	rs1611011	13	20695628	IFT88	recessive_dominant	0.0299667	0.0488346	1.37575	0.601701	protective	NA
KEGG_NEUROTROPHIN_SIGNALING_PATHWAY	REACTOME_ORGANELLE_BIOGENESIS_AND_MAINTENANCE	rs7482257	11	27755298	BDNF	rs2847251	18	12751036	CEP76	recessive_dominant	0.0321865	0.054384	1.37497	0.578262	protective	NA
KEGG_NEUROTROPHIN_SIGNALING_PATHWAY	REACTOME_ORGANELLE_BIOGENESIS_AND_MAINTENANCE	rs4877972	9	88989455	SHC3	rs28716841	5	132733467	KIF3A	dominant	0.0621532	0.0899001	1.37487	0.670904	protective	NA
KEGG_NEUROTROPHIN_SIGNALING_PATHWAY	REACTOME_ORGANELLE_BIOGENESIS_AND_MAINTENANCE	rs2612043	12	66183500	IRAK3	rs62151837	2	73390396	ALMS1	dominant	0.159822	0.196448	1.37436	0.778094	protective	NA
KEGG_NEUROTROPHIN_SIGNALING_PATHWAY	REACTOME_ORGANELLE_BIOGENESIS_AND_MAINTENANCE	rs9347129	6	166895934	RPS6KA2	rs11985061	8	130359659	ASAP1	recessive	0.00332963	0.0144284	1.37385	0.228199	protective	NA
KEGG_NEUROTROPHIN_SIGNALING_PATHWAY	REACTOME_ORGANELLE_BIOGENESIS_AND_MAINTENANCE	rs9347129	6	166895934	RPS6KA2	rs2021883	7	33122453	BBS9	recessive	0.00332963	0.0144284	1.37385	0.228199	protective	NA
KEGG_NEUROTROPHIN_SIGNALING_PATHWAY	REACTOME_ORGANELLE_BIOGENESIS_AND_MAINTENANCE	rs9947044	18	63263494	BCL2	rs11287280	3	45836823	LZTFL1	recessive_dominant	0.0166482	0.0332963	1.37329	0.491535	protective	NA
KEGG_NEUROTROPHIN_SIGNALING_PATHWAY	REACTOME_ORGANELLE_BIOGENESIS_AND_MAINTENANCE	rs557328	19	7902965	MAP2K7	rs56071638	16	53234175	CHD9	recessive_dominant	0.0865705	0.116537	1.37311	0.718486	protective	NA
KEGG_NEUROTROPHIN_SIGNALING_PATHWAY	REACTOME_ORGANELLE_BIOGENESIS_AND_MAINTENANCE	rs7076160	10	48473929	MAPK8	rs10779788	1	5945990	NPHP4	dominant	0.224195	0.264151	1.37243	0.805028	protective	NA
KEGG_NEUROTROPHIN_SIGNALING_PATHWAY	REACTOME_ORGANELLE_BIOGENESIS_AND_MAINTENANCE	rs2612043	12	66183500	IRAK3	rs2847251	18	12751036	CEP76	dominant	0.100999	0.132075	1.37238	0.738272	protective	NA
KEGG_NEUROTROPHIN_SIGNALING_PATHWAY	REACTOME_ORGANELLE_BIOGENESIS_AND_MAINTENANCE	rs62315570	4	86331750	MAPK10	rs62151837	2	73390396	ALMS1	dominant	0.330744	0.374029	1.37203	0.827081	protective	NA
KEGG_NEUROTROPHIN_SIGNALING_PATHWAY	REACTOME_ORGANELLE_BIOGENESIS_AND_MAINTENANCE	rs4307417	9	89218258	SHC3	rs771795	3	101718657	CEP97	recessive	0.0355161	0.0566038	1.37171	0.613732	protective	NA
KEGG_NEUROTROPHIN_SIGNALING_PATHWAY	REACTOME_ORGANELLE_BIOGENESIS_AND_MAINTENANCE	rs55967668	5	68241438	PIK3R1	rs13288249	9	78211618	CEP78	dominant	0.129856	0.164262	1.37155	0.759282	protective	NA
KEGG_NEUROTROPHIN_SIGNALING_PATHWAY	REACTOME_ORGANELLE_BIOGENESIS_AND_MAINTENANCE	rs6094276	20	44949946	YWHAB	rs12302358	12	110239437	IFT81	recessive_dominant	0.00887902	0.0210877	1.37106	0.415866	protective	NA
KEGG_NEUROTROPHIN_SIGNALING_PATHWAY	REACTOME_ORGANELLE_BIOGENESIS_AND_MAINTENANCE	rs9347129	6	166895934	RPS6KA2	rs4921870	8	18023154	PCM1	recessive_dominant	0.0144284	0.0299667	1.37099	0.473891	protective	NA
KEGG_NEUROTROPHIN_SIGNALING_PATHWAY	REACTOME_ORGANELLE_BIOGENESIS_AND_MAINTENANCE	rs4791329	17	7693455	TP53	rs73886521	22	46273829	PPARA	recessive_dominant	0.00554939	0.0122087	1.37075	0.451502	protective	NA
KEGG_NEUROTROPHIN_SIGNALING_PATHWAY	REACTOME_ORGANELLE_BIOGENESIS_AND_MAINTENANCE	rs998521	15	66407072	MAP2K1	rs2065994	1	243265536	SDCCAG8	dominant	0.211987	0.261931	1.37068	0.758027	protective	NA
KEGG_NEUROTROPHIN_SIGNALING_PATHWAY	REACTOME_ORGANELLE_BIOGENESIS_AND_MAINTENANCE	rs7522448	1	109279791	SORT1	rs113230548	2	231791498	PDE6D	recessive_dominant	0.00443951	0.0155383	1.36983	0.282529	protective	NA
KEGG_NEUROTROPHIN_SIGNALING_PATHWAY	REACTOME_ORGANELLE_BIOGENESIS_AND_MAINTENANCE	rs2908290	7	44216137	CAMK2B	rs4921870	8	18023154	PCM1	recessive_dominant	0.0976693	0.128746	1.36886	0.732494	protective	NA
KEGG_NEUROTROPHIN_SIGNALING_PATHWAY	REACTOME_ORGANELLE_BIOGENESIS_AND_MAINTENANCE	rs4791329	17	7693455	TP53	rs6432044	2	10041284	CYS1	recessive_dominant	0.09101	0.120977	1.36653	0.727493	protective	NA
KEGG_NEUROTROPHIN_SIGNALING_PATHWAY	REACTOME_ORGANELLE_BIOGENESIS_AND_MAINTENANCE	rs55967668	5	68241438	PIK3R1	rs6534321	4	122692023	BBS12	recessive_dominant	0.00887902	0.0233074	1.36625	0.375407	protective	NA
KEGG_NEUROTROPHIN_SIGNALING_PATHWAY	REACTOME_ORGANELLE_BIOGENESIS_AND_MAINTENANCE	rs2169633	15	66467291	MAP2K1	rs890980	5	477303	EXOC3	recessive_dominant	0.136515	0.172031	1.36588	0.760909	protective	NA
KEGG_NEUROTROPHIN_SIGNALING_PATHWAY	REACTOME_ORGANELLE_BIOGENESIS_AND_MAINTENANCE	rs139443871	19	4165336	MAP2K2	rs10460000	18	12320551	TUBB6	recessive_dominant	0.0799112	0.107658	1.36508	0.719884	protective	NA
KEGG_NEUROTROPHIN_SIGNALING_PATHWAY	REACTOME_ORGANELLE_BIOGENESIS_AND_MAINTENANCE	rs9786966	1	3623414	TP73	rs37815	16	3455912	CLUAP1	recessive_dominant	0.0144284	0.0299667	1.36505	0.473891	protective	NA
KEGG_NEUROTROPHIN_SIGNALING_PATHWAY	REACTOME_ORGANELLE_BIOGENESIS_AND_MAINTENANCE	rs11102837	1	115346655	NGF	rs4329481	1	20658089	KIF17	recessive_dominant	0.0710322	0.099889	1.36383	0.689022	protective	0.034
KEGG_NEUROTROPHIN_SIGNALING_PATHWAY	REACTOME_ORGANELLE_BIOGENESIS_AND_MAINTENANCE	rs12986190	19	40273038	AKT2	rs9348164	6	167071948	FGFR1OP	dominant	0.245283	0.286349	1.36247	0.809981	protective	NA
KEGG_NEUROTROPHIN_SIGNALING_PATHWAY	REACTOME_ORGANELLE_BIOGENESIS_AND_MAINTENANCE	rs3128321	1	1953252	CALML6	rs11707509	3	196346629	TCTEX1D2	recessive_dominant	0.0399556	0.063263	1.36213	0.616246	protective	NA
KEGG_NEUROTROPHIN_SIGNALING_PATHWAY	REACTOME_ORGANELLE_BIOGENESIS_AND_MAINTENANCE	rs111530414	5	56815966	MAP3K1	rs16996724	22	36772774	IFT27	dominant	0.00776915	0.0255272	1.36159	0.298901	protective	NA
KEGG_NEUROTROPHIN_SIGNALING_PATHWAY	REACTOME_ORGANELLE_BIOGENESIS_AND_MAINTENANCE	rs11063604	12	5408423	NTF3	rs4936388	11	117440404	CEP164	recessive_dominant	0.00776915	0.0199778	1.36127	0.384104	protective	NA
KEGG_NEUROTROPHIN_SIGNALING_PATHWAY	REACTOME_ORGANELLE_BIOGENESIS_AND_MAINTENANCE	rs36133170	6	166600960	RPS6KA2	rs6432044	2	10041284	CYS1	recessive_dominant	0.0099889	0.0288568	1.35997	0.339557	protective	NA
KEGG_NEUROTROPHIN_SIGNALING_PATHWAY	REACTOME_ORGANELLE_BIOGENESIS_AND_MAINTENANCE	rs7805383	7	140908104	BRAF	rs4761574	12	94503883	CEP83	recessive_dominant	0.155383	0.193119	1.35951	0.76865	protective	NA
KEGG_NEUROTROPHIN_SIGNALING_PATHWAY	REACTOME_ORGANELLE_BIOGENESIS_AND_MAINTENANCE	rs7222654	17	8932404	PIK3R5	rs10418927	19	16168734	RAB8A	recessive_dominant	0.0566038	0.0810211	1.3591	0.680548	protective	NA
KEGG_NEUROTROPHIN_SIGNALING_PATHWAY	REACTOME_ORGANELLE_BIOGENESIS_AND_MAINTENANCE	rs200089036	19	38902723	NFKBIB	rs2072826	6	135253558	AHI1	recessive_dominant	0.0754717	0.103219	1.35862	0.709239	protective	NA
KEGG_NEUROTROPHIN_SIGNALING_PATHWAY	REACTOME_ORGANELLE_BIOGENESIS_AND_MAINTENANCE	rs11063604	12	5408423	NTF3	rs7783031	7	151590143	PRKAG2	recessive_dominant	0.0199778	0.0377358	1.35856	0.519819	protective	NA
KEGG_NEUROTROPHIN_SIGNALING_PATHWAY	REACTOME_ORGANELLE_BIOGENESIS_AND_MAINTENANCE	rs1245510	10	73799959	CAMK2G	rs6751305	2	61876220	CCT4	recessive_dominant	0.166482	0.203108	1.35821	0.783655	protective	NA
KEGG_NEUROTROPHIN_SIGNALING_PATHWAY	REACTOME_ORGANELLE_BIOGENESIS_AND_MAINTENANCE	rs2169633	15	66467291	MAP2K1	rs2388229	16	53556997	RPGRIP1L	recessive_dominant	0.0899001	0.118757	1.35813	0.733007	protective	NA
KEGG_NEUROTROPHIN_SIGNALING_PATHWAY	REACTOME_ORGANELLE_BIOGENESIS_AND_MAINTENANCE	rs12070845	1	109261850	SORT1	rs36222127	17	75876781	FBF1	recessive_dominant	0	0.00665927	1.35771	0	protective	NA
KEGG_NEUROTROPHIN_SIGNALING_PATHWAY	REACTOME_ORGANELLE_BIOGENESIS_AND_MAINTENANCE	rs139443871	19	4165336	MAP2K2	rs528424379	16	23661801	PLK1	dominant	0.108768	0.140954	1.35749	0.743786	protective	NA
KEGG_NEUROTROPHIN_SIGNALING_PATHWAY	REACTOME_ORGANELLE_BIOGENESIS_AND_MAINTENANCE	rs9786966	1	3623414	TP73	rs10402773	19	33004535	CEP89	dominant	0.433962	0.482797	1.35742	0.821303	protective	NA
KEGG_NEUROTROPHIN_SIGNALING_PATHWAY	REACTOME_ORGANELLE_BIOGENESIS_AND_MAINTENANCE	rs7033070	9	131586374	RAPGEF1	rs10460000	18	12320551	TUBB6	recessive_dominant	0.0588235	0.0832408	1.3564	0.688333	protective	NA
KEGG_NEUROTROPHIN_SIGNALING_PATHWAY	REACTOME_ORGANELLE_BIOGENESIS_AND_MAINTENANCE	rs17051913	9	89061524	SHC3	rs6751305	2	61876220	CCT4	dominant	0.258602	0.299667	1.35632	0.815164	protective	NA
KEGG_NEUROTROPHIN_SIGNALING_PATHWAY	REACTOME_ORGANELLE_BIOGENESIS_AND_MAINTENANCE	rs71166958	19	4089029	MAP2K2	rs890980	5	477303	EXOC3	recessive_dominant	0.0588235	0.0865705	1.35593	0.659455	protective	NA
KEGG_NEUROTROPHIN_SIGNALING_PATHWAY	REACTOME_ORGANELLE_BIOGENESIS_AND_MAINTENANCE	rs545970	6	44239677	NFKBIE	rs12935211	16	58015332	CNGB1	recessive_dominant	0.0899001	0.125416	1.3556	0.688841	protective	NA
KEGG_NEUROTROPHIN_SIGNALING_PATHWAY	REACTOME_ORGANELLE_BIOGENESIS_AND_MAINTENANCE	rs7805383	7	140908104	BRAF	rs10460000	18	12320551	TUBB6	recessive_dominant	0.082131	0.110988	1.35453	0.716735	protective	NA
KEGG_NEUROTROPHIN_SIGNALING_PATHWAY	REACTOME_ORGANELLE_BIOGENESIS_AND_MAINTENANCE	rs9786966	1	3623414	TP73	rs17166570	5	132660439	KIF3A	recessive_dominant	0.0110988	0.0299667	1.35396	0.363304	protective	NA
KEGG_NEUROTROPHIN_SIGNALING_PATHWAY	REACTOME_ORGANELLE_BIOGENESIS_AND_MAINTENANCE	rs3844536	19	396948	SHC2	rs2790035	9	128439923	ODF2	dominant	0.411765	0.45616	1.35393	0.83455	protective	NA
KEGG_NEUROTROPHIN_SIGNALING_PATHWAY	REACTOME_ORGANELLE_BIOGENESIS_AND_MAINTENANCE	rs6916254	6	136738115	MAP3K5	rs12672218	7	134088779	EXOC4	recessive_dominant	0.0166482	0.0321865	1.35376	0.509068	protective	NA
KEGG_NEUROTROPHIN_SIGNALING_PATHWAY	REACTOME_ORGANELLE_BIOGENESIS_AND_MAINTENANCE	rs201635960	5	180199887	MAPK9	rs7438356	4	15624770	CC2D2A	dominant	0.351831	0.396226	1.35373	0.827136	protective	NA
KEGG_NEUROTROPHIN_SIGNALING_PATHWAY	REACTOME_ORGANELLE_BIOGENESIS_AND_MAINTENANCE	rs3861824	1	58807217	JUN	rs59972802	17	2672013	PAFAH1B1	dominant	0.0610433	0.0865705	1.35292	0.685958	protective	NA
KEGG_NEUROTROPHIN_SIGNALING_PATHWAY	REACTOME_ORGANELLE_BIOGENESIS_AND_MAINTENANCE	rs4791329	17	7693455	TP53	rs235301	21	46297256	PCNT	recessive_dominant	0.0887902	0.118757	1.3529	0.723075	protective	NA
KEGG_NEUROTROPHIN_SIGNALING_PATHWAY	REACTOME_ORGANELLE_BIOGENESIS_AND_MAINTENANCE	rs11102837	1	115346655	NGF	rs6464184	7	151625412	PRKAG2	recessive_dominant	0.0765816	0.103219	1.35246	0.720533	protective	NA
KEGG_NEUROTROPHIN_SIGNALING_PATHWAY	REACTOME_ORGANELLE_BIOGENESIS_AND_MAINTENANCE	rs557328	19	7902965	MAP2K7	rs2130923	4	23781504	PPARGC1A	dominant	0.159822	0.200888	1.35242	0.756694	protective	NA
KEGG_NEUROTROPHIN_SIGNALING_PATHWAY	REACTOME_ORGANELLE_BIOGENESIS_AND_MAINTENANCE	rs34137352	1	3694480	TP73	rs11707509	3	196346629	TCTEX1D2	recessive_dominant	0.0344062	0.0566038	1.35228	0.59387	protective	NA
KEGG_NEUROTROPHIN_SIGNALING_PATHWAY	REACTOME_ORGANELLE_BIOGENESIS_AND_MAINTENANCE	rs557328	19	7902965	MAP2K7	rs7783031	7	151590143	PRKAG2	recessive_dominant	0.0488346	0.0721421	1.35152	0.660336	protective	NA
KEGG_NEUROTROPHIN_SIGNALING_PATHWAY	REACTOME_ORGANELLE_BIOGENESIS_AND_MAINTENANCE	rs55894401	16	81730962	PLCG2	rs12980154	19	18770119	CRTC1	recessive	0.017758	0.0355161	1.34971	0.49096	protective	NA
KEGG_NEUROTROPHIN_SIGNALING_PATHWAY	REACTOME_ORGANELLE_BIOGENESIS_AND_MAINTENANCE	rs8142362	22	20979079	CRKL	rs1365962	2	218857832	PRKAG3	recessive_dominant	0.0732519	0.100999	1.34965	0.70356	protective	NA
KEGG_NEUROTROPHIN_SIGNALING_PATHWAY	REACTOME_ORGANELLE_BIOGENESIS_AND_MAINTENANCE	rs201635960	5	180199887	MAPK9	rs11168720	12	49146750	TUBA1A/TUBA1B	recessive_dominant	0.054384	0.0799112	1.34944	0.662184	protective	NA
KEGG_NEUROTROPHIN_SIGNALING_PATHWAY	REACTOME_ORGANELLE_BIOGENESIS_AND_MAINTENANCE	rs998521	15	66407072	MAP2K1	rs10883462	10	102095122	PPRC1	dominant	0.215316	0.265261	1.34919	0.76005	protective	NA
KEGG_NEUROTROPHIN_SIGNALING_PATHWAY	REACTOME_ORGANELLE_BIOGENESIS_AND_MAINTENANCE	rs55702801	14	73255495	PSEN1	rs11429505	8	70278596	NCOA2	dominant	0.186459	0.226415	1.34873	0.783083	protective	NA
KEGG_NEUROTROPHIN_SIGNALING_PATHWAY	REACTOME_ORGANELLE_BIOGENESIS_AND_MAINTENANCE	rs2803965	14	73098014	PSEN1	rs4726122	7	151675463	PRKAG2	dominant	0.300777	0.344062	1.347	0.820077	protective	NA
KEGG_NEUROTROPHIN_SIGNALING_PATHWAY	REACTOME_ORGANELLE_BIOGENESIS_AND_MAINTENANCE	rs55894401	16	81730962	PLCG2	rs201143490	9	136452021	INPP5E	recessive_dominant	0.0432852	0.0677026	1.34621	0.623027	protective	NA
KEGG_NEUROTROPHIN_SIGNALING_PATHWAY	REACTOME_ORGANELLE_BIOGENESIS_AND_MAINTENANCE	rs201635960	5	180199887	MAPK9	rs62151837	2	73390396	ALMS1	dominant	0.301887	0.344062	1.34518	0.824412	protective	NA
KEGG_NEUROTROPHIN_SIGNALING_PATHWAY	REACTOME_ORGANELLE_BIOGENESIS_AND_MAINTENANCE	rs1245510	10	73799959	CAMK2G	rs6432044	2	10041284	CYS1	recessive_dominant	0.100999	0.137625	1.34446	0.703973	protective	NA
KEGG_NEUROTROPHIN_SIGNALING_PATHWAY	REACTOME_ORGANELLE_BIOGENESIS_AND_MAINTENANCE	rs759228	22	20998186	CRKL	rs3806410	1	156337134	CCT3	recessive_dominant	0.00665927	0.017758	1.34335	0.37081	protective	NA
KEGG_NEUROTROPHIN_SIGNALING_PATHWAY	REACTOME_ORGANELLE_BIOGENESIS_AND_MAINTENANCE	rs12986190	19	40273038	AKT2	rs71626264	3	177098521	TBL1XR1	dominant	0.243063	0.284129	1.34334	0.809058	protective	NA
KEGG_NEUROTROPHIN_SIGNALING_PATHWAY	REACTOME_ORGANELLE_BIOGENESIS_AND_MAINTENANCE	rs55894401	16	81730962	PLCG2	rs10402773	19	33004535	CEP89	dominant	0.3596	0.407325	1.34246	0.817042	protective	NA
KEGG_NEUROTROPHIN_SIGNALING_PATHWAY	REACTOME_ORGANELLE_BIOGENESIS_AND_MAINTENANCE	rs7522448	1	109279791	SORT1	rs2369963	3	132730101	NPHP3	recessive_dominant	0.0799112	0.110988	1.34161	0.695682	protective	NA
KEGG_NEUROTROPHIN_SIGNALING_PATHWAY	REACTOME_ORGANELLE_BIOGENESIS_AND_MAINTENANCE	rs1902716	10	48395086	MAPK8	rs7438356	4	15624770	CC2D2A	recessive_dominant	0.0566038	0.0832408	1.34145	0.6608	protective	NA
KEGG_NEUROTROPHIN_SIGNALING_PATHWAY	REACTOME_ORGANELLE_BIOGENESIS_AND_MAINTENANCE	rs12986190	19	40273038	AKT2	rs12935211	16	58015332	CNGB1	recessive_dominant	0.0854606	0.114317	1.34059	0.723984	protective	NA
KEGG_NEUROTROPHIN_SIGNALING_PATHWAY	REACTOME_ORGANELLE_BIOGENESIS_AND_MAINTENANCE	rs759228	22	20998186	CRKL	rs10421830	19	45210634	MARK4	dominant	0.0410655	0.0621532	1.34045	0.646185	protective	NA
KEGG_NEUROTROPHIN_SIGNALING_PATHWAY	REACTOME_ORGANELLE_BIOGENESIS_AND_MAINTENANCE	rs8073151	17	1495834	CRK	rs3913673	6	159777567	TCP1	recessive_dominant	0.00221976	0.0110988	1.34022	0.19822	protective	NA
KEGG_NEUROTROPHIN_SIGNALING_PATHWAY	REACTOME_ORGANELLE_BIOGENESIS_AND_MAINTENANCE	rs2075076	7	44274642	CAMK2B	rs7798741	7	33585000	BBS9	recessive_dominant	0.063263	0.0876804	1.3397	0.702712	protective	0.002
KEGG_NEUROTROPHIN_SIGNALING_PATHWAY	REACTOME_ORGANELLE_BIOGENESIS_AND_MAINTENANCE	rs8078982	17	49485912	NGFR	rs4936388	11	117440404	CEP164	recessive_dominant	0.0166482	0.0288568	1.33957	0.56976	protective	NA
KEGG_NEUROTROPHIN_SIGNALING_PATHWAY	REACTOME_ORGANELLE_BIOGENESIS_AND_MAINTENANCE	rs10806852	6	166864334	RPS6KA2	rs11996811	8	55744132	TGS1	recessive_dominant	0.0166482	0.0344062	1.33941	0.475133	protective	NA
KEGG_NEUROTROPHIN_SIGNALING_PATHWAY	REACTOME_ORGANELLE_BIOGENESIS_AND_MAINTENANCE	rs55702801	14	73255495	PSEN1	rs2790035	9	128439923	ODF2	dominant	0.167592	0.206437	1.33913	0.773943	protective	NA
KEGG_NEUROTROPHIN_SIGNALING_PATHWAY	REACTOME_ORGANELLE_BIOGENESIS_AND_MAINTENANCE	rs7482257	11	27755298	BDNF	rs12935211	16	58015332	CNGB1	recessive_dominant	0.115427	0.146504	1.33898	0.760199	protective	NA
KEGG_NEUROTROPHIN_SIGNALING_PATHWAY	REACTOME_ORGANELLE_BIOGENESIS_AND_MAINTENANCE	rs78011207	2	226712412	IRS1	rs28716841	5	132733467	KIF3A	recessive_dominant	0.00221976	0.0133185	1.33847	0.164813	protective	NA
KEGG_NEUROTROPHIN_SIGNALING_PATHWAY	REACTOME_ORGANELLE_BIOGENESIS_AND_MAINTENANCE	rs55702801	14	73255495	PSEN1	rs2555285	12	119688325	PRKAB1	dominant	0.164262	0.204218	1.33814	0.765893	protective	NA
KEGG_NEUROTROPHIN_SIGNALING_PATHWAY	REACTOME_ORGANELLE_BIOGENESIS_AND_MAINTENANCE	rs2239798	6	36177857	MAPK13	rs72742147	9	78289116	CEP78	dominant	0.0510544	0.0743618	1.338	0.669704	protective	NA
KEGG_NEUROTROPHIN_SIGNALING_PATHWAY	REACTOME_ORGANELLE_BIOGENESIS_AND_MAINTENANCE	rs629608	1	111738116	RAP1A	rs112830612	9	19007971	HAUS6	recessive_dominant	0.00110988	0.00887902	1.3378	0.124028	protective	NA
KEGG_NEUROTROPHIN_SIGNALING_PATHWAY	REACTOME_ORGANELLE_BIOGENESIS_AND_MAINTENANCE	rs10413331	19	58203728	ZNF274	rs72721702	14	75960724	IFT43	recessive_dominant	0.00332963	0.0133185	1.33778	0.247494	protective	NA
KEGG_NEUROTROPHIN_SIGNALING_PATHWAY	REACTOME_ORGANELLE_BIOGENESIS_AND_MAINTENANCE	rs28574697	19	48959488	BAX	rs1396893	8	55779322	TGS1	recessive_dominant	0.0288568	0.0477248	1.33763	0.592904	protective	NA
KEGG_NEUROTROPHIN_SIGNALING_PATHWAY	REACTOME_ORGANELLE_BIOGENESIS_AND_MAINTENANCE	rs7076160	10	48473929	MAPK8	rs4761574	12	94503883	CEP83	dominant	0.279689	0.320755	1.33751	0.82226	protective	NA
KEGG_NEUROTROPHIN_SIGNALING_PATHWAY	REACTOME_ORGANELLE_BIOGENESIS_AND_MAINTENANCE	rs9759629	4	113743604	CAMK2D	rs536327334	13	20581760	IFT88	dominant	0.416204	0.460599	1.33709	0.834899	protective	NA
KEGG_NEUROTROPHIN_SIGNALING_PATHWAY	REACTOME_ORGANELLE_BIOGENESIS_AND_MAINTENANCE	rs9786966	1	3623414	TP73	rs1365962	2	218857832	PRKAG3	recessive_dominant	0.0843507	0.114317	1.33666	0.713716	protective	NA
KEGG_NEUROTROPHIN_SIGNALING_PATHWAY	REACTOME_ORGANELLE_BIOGENESIS_AND_MAINTENANCE	rs531967415	1	114764150	NRAS	rs4329481	1	20658089	KIF17	recessive	0.0144284	0.0288568	1.33654	0.49268	protective	1.491e-04
KEGG_NEUROTROPHIN_SIGNALING_PATHWAY	REACTOME_ORGANELLE_BIOGENESIS_AND_MAINTENANCE	rs62315570	4	86331750	MAPK10	rs73094828	20	32316895	KIF3B	recessive_dominant	0.0321865	0.0532741	1.33574	0.591002	protective	NA
KEGG_NEUROTROPHIN_SIGNALING_PATHWAY	REACTOME_ORGANELLE_BIOGENESIS_AND_MAINTENANCE	rs529025836	17	63636272	MAP3K3	rs2369963	3	132730101	NPHP3	recessive_dominant	0.136515	0.172031	1.33552	0.760909	protective	NA
KEGG_NEUROTROPHIN_SIGNALING_PATHWAY	REACTOME_ORGANELLE_BIOGENESIS_AND_MAINTENANCE	rs8073151	17	1495834	CRK	rs2234182	19	6535080	TUBB4A	recessive_dominant	0.133185	0.166482	1.33478	0.76927	protective	NA
KEGG_NEUROTROPHIN_SIGNALING_PATHWAY	REACTOME_ORGANELLE_BIOGENESIS_AND_MAINTENANCE	rs2803965	14	73098014	PSEN1	rs612700	11	74127339	C2CD3	dominant	0.296337	0.340733	1.33455	0.814836	protective	NA
KEGG_NEUROTROPHIN_SIGNALING_PATHWAY	REACTOME_ORGANELLE_BIOGENESIS_AND_MAINTENANCE	rs7805383	7	140908104	BRAF	rs7214893	17	76140308	EXOC7	dominant	0.407325	0.45061	1.33448	0.837923	protective	NA
KEGG_NEUROTROPHIN_SIGNALING_PATHWAY	REACTOME_ORGANELLE_BIOGENESIS_AND_MAINTENANCE	rs2169633	15	66467291	MAP2K1	rs17017668	1	211694508	NEK2	dominant	0.0887902	0.116537	1.33365	0.738704	protective	NA
KEGG_NEUROTROPHIN_SIGNALING_PATHWAY	REACTOME_ORGANELLE_BIOGENESIS_AND_MAINTENANCE	rs8142362	22	20979079	CRKL	rs7129263	11	248077	SIRT3	recessive_dominant	0.0310766	0.0510544	1.33355	0.596145	protective	NA
KEGG_NEUROTROPHIN_SIGNALING_PATHWAY	REACTOME_ORGANELLE_BIOGENESIS_AND_MAINTENANCE	rs7805383	7	140908104	BRAF	rs55924499	7	151517706	PRKAG2	dominant	0.380688	0.428413	1.33339	0.820125	protective	2.108e-05
KEGG_NEUROTROPHIN_SIGNALING_PATHWAY	REACTOME_ORGANELLE_BIOGENESIS_AND_MAINTENANCE	rs13322072	3	179282730	PIK3CA	rs7562959	2	121577641	CLASP1	recessive	0	0.00665927	1.33334	0	protective	NA
KEGG_NEUROTROPHIN_SIGNALING_PATHWAY	REACTOME_ORGANELLE_BIOGENESIS_AND_MAINTENANCE	rs2169633	15	66467291	MAP2K1	rs11168720	12	49146750	TUBA1A/TUBA1B	recessive_dominant	0.0643729	0.09101	1.33313	0.68718	protective	NA
KEGG_NEUROTROPHIN_SIGNALING_PATHWAY	REACTOME_ORGANELLE_BIOGENESIS_AND_MAINTENANCE	rs36133170	6	166600960	RPS6KA2	rs2130923	4	23781504	PPARGC1A	recessive_dominant	0	0.00776915	1.33243	0	protective	NA
KEGG_NEUROTROPHIN_SIGNALING_PATHWAY	REACTOME_ORGANELLE_BIOGENESIS_AND_MAINTENANCE	rs12425324	12	111407697	SH2B3	rs4936388	11	117440404	CEP164	recessive_dominant	0.0188679	0.0344062	1.33131	0.539702	protective	NA
KEGG_NEUROTROPHIN_SIGNALING_PATHWAY	REACTOME_ORGANELLE_BIOGENESIS_AND_MAINTENANCE	rs12950747	17	8996860	PIK3R5	rs11168720	12	49146750	TUBA1A/TUBA1B	recessive_dominant	0.00554939	0.0188679	1.33023	0.290179	protective	NA
KEGG_NEUROTROPHIN_SIGNALING_PATHWAY	REACTOME_ORGANELLE_BIOGENESIS_AND_MAINTENANCE	rs4820983	22	31929654	YWHAH	rs16996724	22	36772774	IFT27	recessive_dominant	0.0188679	0.0410655	1.33	0.449064	protective	0.001
KEGG_NEUROTROPHIN_SIGNALING_PATHWAY	REACTOME_ORGANELLE_BIOGENESIS_AND_MAINTENANCE	rs2087072	1	243829549	AKT3	rs12933372	16	80566189	DYNLRB2	recessive_dominant	0.0188679	0.036626	1.32953	0.505828	protective	NA
KEGG_NEUROTROPHIN_SIGNALING_PATHWAY	REACTOME_ORGANELLE_BIOGENESIS_AND_MAINTENANCE	rs201635960	5	180199887	MAPK9	rs7476037	10	5376275	TUBAL3	recessive_dominant	0.0577137	0.0843507	1.32804	0.664869	protective	NA
KEGG_NEUROTROPHIN_SIGNALING_PATHWAY	REACTOME_ORGANELLE_BIOGENESIS_AND_MAINTENANCE	rs7482257	11	27755298	BDNF	rs2489138	1	156526564	MEF2D	dominant	0.406215	0.45727	1.32631	0.811968	protective	NA
KEGG_NEUROTROPHIN_SIGNALING_PATHWAY	REACTOME_ORGANELLE_BIOGENESIS_AND_MAINTENANCE	rs55894401	16	81730962	PLCG2	rs2234182	19	6535080	TUBB4A	recessive_dominant	0.0466149	0.0688124	1.32561	0.661647	protective	NA
KEGG_NEUROTROPHIN_SIGNALING_PATHWAY	REACTOME_ORGANELLE_BIOGENESIS_AND_MAINTENANCE	rs529025836	17	63636272	MAP3K3	rs1917460	11	103527656	DYNC2H1	recessive_dominant	0.108768	0.142064	1.32511	0.737021	protective	NA
KEGG_NEUROTROPHIN_SIGNALING_PATHWAY	REACTOME_ORGANELLE_BIOGENESIS_AND_MAINTENANCE	rs2908290	7	44216137	CAMK2B	rs11432188	9	34575985	DCTN3	dominant	0.203108	0.243063	1.32269	0.793719	protective	NA
KEGG_NEUROTROPHIN_SIGNALING_PATHWAY	REACTOME_ORGANELLE_BIOGENESIS_AND_MAINTENANCE	rs200089036	19	38902723	NFKBIB	rs4329481	1	20658089	KIF17	recessive_dominant	0.0843507	0.114317	1.32089	0.713716	protective	NA
KEGG_NEUROTROPHIN_SIGNALING_PATHWAY	REACTOME_ORGANELLE_BIOGENESIS_AND_MAINTENANCE	rs545970	6	44239677	NFKBIE	rs16996724	22	36772774	IFT27	dominant	0.0532741	0.0832408	1.31968	0.619742	protective	NA
KEGG_NEUROTROPHIN_SIGNALING_PATHWAY	REACTOME_ORGANELLE_BIOGENESIS_AND_MAINTENANCE	rs531967415	1	114764150	NRAS	rs553512184	1	153989995	CRTC2	recessive_dominant	0.122087	0.155383	1.31916	0.755915	protective	8.243e-04
KEGG_NEUROTROPHIN_SIGNALING_PATHWAY	REACTOME_ORGANELLE_BIOGENESIS_AND_MAINTENANCE	rs2908290	7	44216137	CAMK2B	rs37815	16	3455912	CLUAP1	dominant	0.204218	0.244173	1.3191	0.79437	protective	NA
KEGG_NEUROTROPHIN_SIGNALING_PATHWAY	REACTOME_ORGANELLE_BIOGENESIS_AND_MAINTENANCE	rs4820983	22	31929654	YWHAH	rs34144731	4	55921913	CEP135/EXOC1	recessive_dominant	0.00776915	0.0210877	1.31866	0.363476	protective	NA
KEGG_NEUROTROPHIN_SIGNALING_PATHWAY	REACTOME_ORGANELLE_BIOGENESIS_AND_MAINTENANCE	rs6924899	6	166476996	RPS6KA2	rs34144731	4	55921913	CEP135/EXOC1	recessive_dominant	0.00776915	0.0210877	1.31866	0.363476	protective	NA
KEGG_NEUROTROPHIN_SIGNALING_PATHWAY	REACTOME_ORGANELLE_BIOGENESIS_AND_MAINTENANCE	rs7482257	11	27755298	BDNF	rs34144731	4	55921913	CEP135/EXOC1	recessive_dominant	0.00776915	0.0210877	1.31866	0.363476	protective	NA
KEGG_NEUROTROPHIN_SIGNALING_PATHWAY	REACTOME_ORGANELLE_BIOGENESIS_AND_MAINTENANCE	rs2908290	7	44216137	CAMK2B	rs200502024	3	121820354	IQCB1	recessive_dominant	0.0133185	0.0310766	1.31854	0.420858	protective	NA
KEGG_NEUROTROPHIN_SIGNALING_PATHWAY	REACTOME_ORGANELLE_BIOGENESIS_AND_MAINTENANCE	rs13322072	3	179282730	PIK3CA	rs9385719	6	135524516	AHI1	dominant	0.418424	0.468368	1.31806	0.816645	protective	NA
KEGG_NEUROTROPHIN_SIGNALING_PATHWAY	REACTOME_ORGANELLE_BIOGENESIS_AND_MAINTENANCE	rs13322072	3	179282730	PIK3CA	rs7804751	7	151645370	PRKAG2	recessive_dominant	0.129856	0.168701	1.31795	0.735374	protective	NA
KEGG_NEUROTROPHIN_SIGNALING_PATHWAY	REACTOME_ORGANELLE_BIOGENESIS_AND_MAINTENANCE	rs2908290	7	44216137	CAMK2B	rs2790035	9	128439923	ODF2	dominant	0.45727	0.502775	1.31794	0.833236	protective	NA
KEGG_NEUROTROPHIN_SIGNALING_PATHWAY	REACTOME_ORGANELLE_BIOGENESIS_AND_MAINTENANCE	rs2075076	7	44274642	CAMK2B	rs9329423	1	5828193	NPHP4	recessive_dominant	0.0210877	0.0377358	1.3175	0.54932	protective	NA
KEGG_NEUROTROPHIN_SIGNALING_PATHWAY	REACTOME_ORGANELLE_BIOGENESIS_AND_MAINTENANCE	rs325923	1	111691513	RAP1A	rs2847251	18	12751036	CEP76	recessive_dominant	0.0299667	0.0510544	1.31705	0.574197	protective	NA
KEGG_NEUROTROPHIN_SIGNALING_PATHWAY	REACTOME_ORGANELLE_BIOGENESIS_AND_MAINTENANCE	rs17051913	9	89061524	SHC3	rs142436966	2	74351590	DCTN1	recessive_dominant	0.0443951	0.0665927	1.31624	0.651181	protective	NA
KEGG_NEUROTROPHIN_SIGNALING_PATHWAY	REACTOME_ORGANELLE_BIOGENESIS_AND_MAINTENANCE	rs34137352	1	3694480	TP73	rs73886521	22	46273829	PPARA	recessive_dominant	0	0.00665927	1.31622	0	protective	NA
KEGG_NEUROTROPHIN_SIGNALING_PATHWAY	REACTOME_ORGANELLE_BIOGENESIS_AND_MAINTENANCE	rs557328	19	7902965	MAP2K7	rs536327334	13	20581760	IFT88	recessive_dominant	0.082131	0.108768	1.31611	0.733189	protective	NA
KEGG_NEUROTROPHIN_SIGNALING_PATHWAY	REACTOME_ORGANELLE_BIOGENESIS_AND_MAINTENANCE	rs13322072	3	179282730	PIK3CA	rs12935211	16	58015332	CNGB1	dominant	0.36515	0.413984	1.31554	0.814188	protective	NA
KEGG_NEUROTROPHIN_SIGNALING_PATHWAY	REACTOME_ORGANELLE_BIOGENESIS_AND_MAINTENANCE	rs4877972	9	88989455	SHC3	rs6593798	1	147135704	PRKAB2	dominant	0.231964	0.27192	1.31544	0.808682	protective	NA
KEGG_NEUROTROPHIN_SIGNALING_PATHWAY	REACTOME_ORGANELLE_BIOGENESIS_AND_MAINTENANCE	rs2239798	6	36177857	MAPK13	rs4655200	1	20672101	KIF17	dominant	0.149834	0.18424	1.31523	0.780341	protective	NA
KEGG_NEUROTROPHIN_SIGNALING_PATHWAY	REACTOME_ORGANELLE_BIOGENESIS_AND_MAINTENANCE	rs72765496	5	56945800	MAP3K1	rs2065994	1	243265536	SDCCAG8	recessive_dominant	0.0144284	0.0288568	1.31247	0.49268	protective	NA
KEGG_NEUROTROPHIN_SIGNALING_PATHWAY	REACTOME_ORGANELLE_BIOGENESIS_AND_MAINTENANCE	rs13322072	3	179282730	PIK3CA	rs1917460	11	103527656	DYNC2H1	dominant	0.316315	0.36404	1.31219	0.808249	protective	NA
KEGG_NEUROTROPHIN_SIGNALING_PATHWAY	REACTOME_ORGANELLE_BIOGENESIS_AND_MAINTENANCE	rs147511193	3	119945039	GSK3B	rs1611011	13	20695628	IFT88	recessive_dominant	0	0.00665927	1.31209	0	protective	NA
KEGG_NEUROTROPHIN_SIGNALING_PATHWAY	REACTOME_ORGANELLE_BIOGENESIS_AND_MAINTENANCE	rs557328	19	7902965	MAP2K7	rs142436966	2	74351590	DCTN1	dominant	0.257492	0.302997	1.3116	0.797735	protective	NA
KEGG_NEUROTROPHIN_SIGNALING_PATHWAY	REACTOME_ORGANELLE_BIOGENESIS_AND_MAINTENANCE	rs9759629	4	113743604	CAMK2D	rs2105847	4	2271113	HAUS3	dominant	0.346282	0.399556	1.31157	0.796038	protective	0.028
KEGG_NEUROTROPHIN_SIGNALING_PATHWAY	REACTOME_ORGANELLE_BIOGENESIS_AND_MAINTENANCE	rs2169633	15	66467291	MAP2K1	rs57206977	11	66535424	BBS1	recessive_dominant	0.0110988	0.0255272	1.31087	0.428439	protective	NA
KEGG_NEUROTROPHIN_SIGNALING_PATHWAY	REACTOME_ORGANELLE_BIOGENESIS_AND_MAINTENANCE	rs7805383	7	140908104	BRAF	rs28396987	22	36823436	IFT27	recessive_dominant	0.115427	0.149834	1.31082	0.740406	protective	NA
KEGG_NEUROTROPHIN_SIGNALING_PATHWAY	REACTOME_ORGANELLE_BIOGENESIS_AND_MAINTENANCE	rs9947044	18	63263494	BCL2	rs4917904	10	102447292	ACTR1A	recessive_dominant	0.0388457	0.0610433	1.31001	0.621667	protective	NA
KEGG_NEUROTROPHIN_SIGNALING_PATHWAY	REACTOME_ORGANELLE_BIOGENESIS_AND_MAINTENANCE	rs62315570	4	86331750	MAPK10	rs979802	11	103388805	DYNC2H1	dominant	0.389567	0.443951	1.30922	0.799323	protective	NA
KEGG_NEUROTROPHIN_SIGNALING_PATHWAY	REACTOME_ORGANELLE_BIOGENESIS_AND_MAINTENANCE	rs2859240	1	172624233	FASLG	rs11287280	3	45836823	LZTFL1	recessive_dominant	0.0155383	0.0332963	1.30914	0.458249	protective	NA
KEGG_NEUROTROPHIN_SIGNALING_PATHWAY	REACTOME_ORGANELLE_BIOGENESIS_AND_MAINTENANCE	rs3861824	1	58807217	JUN	rs428183	7	158962061	WDR60	recessive_dominant	0.0410655	0.063263	1.30822	0.634097	protective	NA
KEGG_NEUROTROPHIN_SIGNALING_PATHWAY	REACTOME_ORGANELLE_BIOGENESIS_AND_MAINTENANCE	rs55702801	14	73255495	PSEN1	rs2021883	7	33122453	BBS9	dominant	0.174251	0.213097	1.30822	0.779241	protective	NA
KEGG_NEUROTROPHIN_SIGNALING_PATHWAY	REACTOME_ORGANELLE_BIOGENESIS_AND_MAINTENANCE	rs3861824	1	58807217	JUN	rs55759073	19	619337	POLRMT	dominant	0.0244173	0.0432852	1.30705	0.553193	protective	NA
KEGG_NEUROTROPHIN_SIGNALING_PATHWAY	REACTOME_ORGANELLE_BIOGENESIS_AND_MAINTENANCE	rs9759629	4	113743604	CAMK2D	rs55924499	7	151517706	PRKAG2	dominant	0.346282	0.389567	1.30693	0.830032	protective	NA
KEGG_NEUROTROPHIN_SIGNALING_PATHWAY	REACTOME_ORGANELLE_BIOGENESIS_AND_MAINTENANCE	rs55702801	14	73255495	PSEN1	rs10421830	19	45210634	MARK4	recessive_dominant	0.00221976	0.0110988	1.30682	0.19822	protective	NA
KEGG_NEUROTROPHIN_SIGNALING_PATHWAY	REACTOME_ORGANELLE_BIOGENESIS_AND_MAINTENANCE	rs34137352	1	3694480	TP73	rs142436966	2	74351590	DCTN1	recessive_dominant	0.0255272	0.0432852	1.30674	0.578997	protective	NA
KEGG_NEUROTROPHIN_SIGNALING_PATHWAY	REACTOME_ORGANELLE_BIOGENESIS_AND_MAINTENANCE	rs56002030	19	49073984	NTF4	rs73094828	20	32316895	KIF3B	dominant	0.168701	0.205327	1.30661	0.785422	protective	NA
KEGG_NEUROTROPHIN_SIGNALING_PATHWAY	REACTOME_ORGANELLE_BIOGENESIS_AND_MAINTENANCE	rs139443871	19	4165336	MAP2K2	rs11707509	3	196346629	TCTEX1D2	recessive_dominant	0.0899001	0.118757	1.30621	0.733007	protective	NA
KEGG_NEUROTROPHIN_SIGNALING_PATHWAY	REACTOME_ORGANELLE_BIOGENESIS_AND_MAINTENANCE	rs7805383	7	140908104	BRAF	rs3858285	10	92955129	EXOC6	recessive	0.0488346	0.0754717	1.30615	0.628938	protective	NA
KEGG_NEUROTROPHIN_SIGNALING_PATHWAY	REACTOME_ORGANELLE_BIOGENESIS_AND_MAINTENANCE	rs4877972	9	88989455	SHC3	rs2847251	18	12751036	CEP76	recessive_dominant	0.0332963	0.0554939	1.30574	0.586223	protective	NA
KEGG_NEUROTROPHIN_SIGNALING_PATHWAY	REACTOME_ORGANELLE_BIOGENESIS_AND_MAINTENANCE	rs2803965	14	73098014	PSEN1	rs1365962	2	218857832	PRKAG3	recessive_dominant	0.0488346	0.0743618	1.30525	0.639092	protective	NA
KEGG_NEUROTROPHIN_SIGNALING_PATHWAY	REACTOME_ORGANELLE_BIOGENESIS_AND_MAINTENANCE	rs2908290	7	44216137	CAMK2B	rs10421830	19	45210634	MARK4	recessive_dominant	0.0699223	0.0965594	1.3051	0.703399	protective	NA
KEGG_NEUROTROPHIN_SIGNALING_PATHWAY	REACTOME_ORGANELLE_BIOGENESIS_AND_MAINTENANCE	rs12070845	1	109261850	SORT1	rs536327334	13	20581760	IFT88	recessive_dominant	0	0.00665927	1.30488	0	protective	NA
KEGG_NEUROTROPHIN_SIGNALING_PATHWAY	REACTOME_ORGANELLE_BIOGENESIS_AND_MAINTENANCE	rs529025836	17	63636272	MAP3K3	rs12935211	16	58015332	CNGB1	recessive_dominant	0.142064	0.17758	1.30456	0.766882	protective	NA
KEGG_NEUROTROPHIN_SIGNALING_PATHWAY	REACTOME_ORGANELLE_BIOGENESIS_AND_MAINTENANCE	rs529025836	17	63636272	MAP3K3	rs10812525	9	27084462	IFT74	recessive_dominant	0.142064	0.17758	1.30456	0.766882	protective	NA
KEGG_NEUROTROPHIN_SIGNALING_PATHWAY	REACTOME_ORGANELLE_BIOGENESIS_AND_MAINTENANCE	rs557328	19	7902965	MAP2K7	rs12819938	12	119702178	PRKAB1	recessive	0.0310766	0.0510544	1.3041	0.596145	protective	NA
KEGG_NEUROTROPHIN_SIGNALING_PATHWAY	REACTOME_ORGANELLE_BIOGENESIS_AND_MAINTENANCE	rs4144887	6	166747512	RPS6KA2	rs113230548	2	231791498	PDE6D	recessive_dominant	0.00110988	0.00887902	1.30401	0.124028	protective	NA
KEGG_NEUROTROPHIN_SIGNALING_PATHWAY	REACTOME_ORGANELLE_BIOGENESIS_AND_MAINTENANCE	rs9759629	4	113743604	CAMK2D	rs4655200	1	20672101	KIF17	dominant	0.256382	0.296337	1.30387	0.818682	protective	NA
KEGG_NEUROTROPHIN_SIGNALING_PATHWAY	REACTOME_ORGANELLE_BIOGENESIS_AND_MAINTENANCE	rs7805383	7	140908104	BRAF	rs533119830	22	40656205	MCHR1	recessive_dominant	0.0776915	0.105438	1.30374	0.714675	protective	NA
KEGG_NEUROTROPHIN_SIGNALING_PATHWAY	REACTOME_ORGANELLE_BIOGENESIS_AND_MAINTENANCE	rs545970	6	44239677	NFKBIE	rs6534321	4	122692023	BBS12	recessive_dominant	0.0166482	0.0321865	1.30289	0.509068	protective	NA
KEGG_NEUROTROPHIN_SIGNALING_PATHWAY	REACTOME_ORGANELLE_BIOGENESIS_AND_MAINTENANCE	rs55894401	16	81730962	PLCG2	rs4870327	6	155281493	TFB1M	recessive_dominant	0.0477248	0.0721421	1.30288	0.644576	protective	NA
KEGG_NEUROTROPHIN_SIGNALING_PATHWAY	REACTOME_ORGANELLE_BIOGENESIS_AND_MAINTENANCE	rs9347129	6	166895934	RPS6KA2	rs2655172	8	70154581	NCOA2	recessive_dominant	0.0199778	0.0388457	1.30226	0.504384	protective	NA
KEGG_NEUROTROPHIN_SIGNALING_PATHWAY	REACTOME_ORGANELLE_BIOGENESIS_AND_MAINTENANCE	rs17051913	9	89061524	SHC3	rs12682725	9	19146715	HAUS6	recessive_dominant	0.0166482	0.0321865	1.30151	0.509068	protective	4.758e-05
KEGG_NEUROTROPHIN_SIGNALING_PATHWAY	REACTOME_ORGANELLE_BIOGENESIS_AND_MAINTENANCE	rs62315570	4	86331750	MAPK10	rs12761305	10	92814031	EXOC6	recessive_dominant	0.108768	0.139845	1.30091	0.750657	protective	NA
KEGG_NEUROTROPHIN_SIGNALING_PATHWAY	REACTOME_ORGANELLE_BIOGENESIS_AND_MAINTENANCE	rs1018102	1	22041073	CDC42	rs9294982	6	169696898	TCTE3	recessive_dominant	0.135405	0.174251	1.29972	0.742157	protective	NA
KEGG_NEUROTROPHIN_SIGNALING_PATHWAY	REACTOME_ORGANELLE_BIOGENESIS_AND_MAINTENANCE	rs1902716	10	48395086	MAPK8	rs2021883	7	33122453	BBS9	dominant	0.26859	0.314095	1.29868	0.801922	protective	NA
KEGG_NEUROTROPHIN_SIGNALING_PATHWAY	REACTOME_ORGANELLE_BIOGENESIS_AND_MAINTENANCE	rs2908290	7	44216137	CAMK2B	rs4821542	22	37252918	SSTR3	recessive_dominant	0.0244173	0.045505	1.29829	0.524987	protective	NA
KEGG_NEUROTROPHIN_SIGNALING_PATHWAY	REACTOME_ORGANELLE_BIOGENESIS_AND_MAINTENANCE	rs34137352	1	3694480	TP73	rs4959880	6	442206	EXOC2	dominant	0.106548	0.140954	1.29802	0.726796	protective	NA
KEGG_NEUROTROPHIN_SIGNALING_PATHWAY	REACTOME_ORGANELLE_BIOGENESIS_AND_MAINTENANCE	rs8073151	17	1495834	CRK	rs71421442	14	57152633	EXOC5	recessive_dominant	0.125416	0.157603	1.2974	0.766489	protective	NA
KEGG_NEUROTROPHIN_SIGNALING_PATHWAY	REACTOME_ORGANELLE_BIOGENESIS_AND_MAINTENANCE	rs7076160	10	48473929	MAPK8	rs4959880	6	442206	EXOC2	dominant	0.18313	0.223085	1.29711	0.780743	protective	NA
KEGG_NEUROTROPHIN_SIGNALING_PATHWAY	REACTOME_ORGANELLE_BIOGENESIS_AND_MAINTENANCE	rs629608	1	111738116	RAP1A	rs201143490	9	136452021	INPP5E	recessive_dominant	0.109878	0.142064	1.29673	0.74547	protective	NA
KEGG_NEUROTROPHIN_SIGNALING_PATHWAY	REACTOME_ORGANELLE_BIOGENESIS_AND_MAINTENANCE	rs1018102	1	22041073	CDC42	rs7438356	4	15624770	CC2D2A	recessive_dominant	0.112098	0.144284	1.29627	0.74876	protective	NA
KEGG_NEUROTROPHIN_SIGNALING_PATHWAY	REACTOME_ORGANELLE_BIOGENESIS_AND_MAINTENANCE	rs8073151	17	1495834	CRK	rs771795	3	101718657	CEP97	recessive_dominant	0.169811	0.205327	1.29582	0.791646	protective	NA
KEGG_NEUROTROPHIN_SIGNALING_PATHWAY	REACTOME_ORGANELLE_BIOGENESIS_AND_MAINTENANCE	rs55702801	14	73255495	PSEN1	rs9294982	6	169696898	TCTE3	dominant	0.157603	0.195339	1.29533	0.770676	protective	NA
KEGG_NEUROTROPHIN_SIGNALING_PATHWAY	REACTOME_ORGANELLE_BIOGENESIS_AND_MAINTENANCE	rs2803965	14	73098014	PSEN1	rs4959880	6	442206	EXOC2	dominant	0.258602	0.301887	1.29527	0.806606	protective	NA
KEGG_NEUROTROPHIN_SIGNALING_PATHWAY	REACTOME_ORGANELLE_BIOGENESIS_AND_MAINTENANCE	rs55967668	5	68241438	PIK3R1	rs12935211	16	58015332	CNGB1	dominant	0.189789	0.225305	1.29513	0.805439	protective	NA
KEGG_NEUROTROPHIN_SIGNALING_PATHWAY	REACTOME_ORGANELLE_BIOGENESIS_AND_MAINTENANCE	rs2075076	7	44274642	CAMK2B	rs4679312	3	126676788	CHCHD6	recessive_dominant	0.0510544	0.0732519	1.29506	0.680666	protective	NA
KEGG_NEUROTROPHIN_SIGNALING_PATHWAY	REACTOME_ORGANELLE_BIOGENESIS_AND_MAINTENANCE	rs3861824	1	58807217	JUN	rs7476037	10	5376275	TUBAL3	dominant	0.082131	0.109878	1.29482	0.724879	protective	NA
KEGG_NEUROTROPHIN_SIGNALING_PATHWAY	REACTOME_ORGANELLE_BIOGENESIS_AND_MAINTENANCE	rs10806852	6	166864334	RPS6KA2	rs57156634	11	103446048	DYNC2H1	recessive_dominant	0	0.00221976	1.29465	0	protective	NA
KEGG_NEUROTROPHIN_SIGNALING_PATHWAY	REACTOME_ORGANELLE_BIOGENESIS_AND_MAINTENANCE	rs2087072	1	243829549	AKT3	rs10402773	19	33004535	CEP89	recessive_dominant	0.119867	0.156493	1.29461	0.734083	protective	NA
KEGG_NEUROTROPHIN_SIGNALING_PATHWAY	REACTOME_ORGANELLE_BIOGENESIS_AND_MAINTENANCE	rs68104879	17	8896949	PIK3R5	rs17166570	5	132660439	KIF3A	dominant	0.0521643	0.0810211	1.29442	0.624234	protective	NA
KEGG_NEUROTROPHIN_SIGNALING_PATHWAY	REACTOME_ORGANELLE_BIOGENESIS_AND_MAINTENANCE	rs4791329	17	7693455	TP53	rs4870327	6	155281493	TFB1M	recessive_dominant	0.0754717	0.103219	1.29437	0.709239	protective	NA
KEGG_NEUROTROPHIN_SIGNALING_PATHWAY	REACTOME_ORGANELLE_BIOGENESIS_AND_MAINTENANCE	rs62315570	4	86331750	MAPK10	rs6751305	2	61876220	CCT4	recessive	0.0332963	0.0532741	1.2942	0.612084	protective	NA
KEGG_NEUROTROPHIN_SIGNALING_PATHWAY	REACTOME_ORGANELLE_BIOGENESIS_AND_MAINTENANCE	rs1245510	10	73799959	CAMK2G	rs11429505	8	70278596	NCOA2	dominant	0.499445	0.54273	1.29415	0.840668	protective	NA
KEGG_NEUROTROPHIN_SIGNALING_PATHWAY	REACTOME_ORGANELLE_BIOGENESIS_AND_MAINTENANCE	rs2859240	1	172624233	FASLG	rs2021883	7	33122453	BBS9	recessive	0.0310766	0.0532741	1.29383	0.569969	protective	NA
KEGG_NEUROTROPHIN_SIGNALING_PATHWAY	REACTOME_ORGANELLE_BIOGENESIS_AND_MAINTENANCE	rs12986190	19	40273038	AKT2	rs2018797	7	129210004	SMO	recessive_dominant	0.09101	0.119867	1.29354	0.735156	protective	NA
KEGG_NEUROTROPHIN_SIGNALING_PATHWAY	REACTOME_ORGANELLE_BIOGENESIS_AND_MAINTENANCE	rs62315570	4	86331750	MAPK10	rs7438356	4	15624770	CC2D2A	recessive_dominant	0.102109	0.132075	1.29352	0.747307	protective	7.722e-05
KEGG_NEUROTROPHIN_SIGNALING_PATHWAY	REACTOME_ORGANELLE_BIOGENESIS_AND_MAINTENANCE	rs12986190	19	40273038	AKT2	rs34487560	4	56029268	CEP135	dominant	0.27525	0.316315	1.29262	0.82087	protective	NA
KEGG_NEUROTROPHIN_SIGNALING_PATHWAY	REACTOME_ORGANELLE_BIOGENESIS_AND_MAINTENANCE	rs78011207	2	226712412	IRS1	rs2065994	1	243265536	SDCCAG8	recessive	0.00665927	0.017758	1.29192	0.37081	protective	NA
KEGG_NEUROTROPHIN_SIGNALING_PATHWAY	REACTOME_ORGANELLE_BIOGENESIS_AND_MAINTENANCE	rs56002030	19	49073984	NTF4	rs4917904	10	102447292	ACTR1A	recessive_dominant	0.0521643	0.0776915	1.29138	0.653346	protective	NA
KEGG_NEUROTROPHIN_SIGNALING_PATHWAY	REACTOME_ORGANELLE_BIOGENESIS_AND_MAINTENANCE	rs529025836	17	63636272	MAP3K3	rs72620819	2	238354982	TRAF3IP1	recessive_dominant	0.0532741	0.0799112	1.2909	0.647909	protective	NA
KEGG_NEUROTROPHIN_SIGNALING_PATHWAY	REACTOME_ORGANELLE_BIOGENESIS_AND_MAINTENANCE	rs2087072	1	243829549	AKT3	rs62151837	2	73390396	ALMS1	recessive_dominant	0.0921199	0.122087	1.29009	0.72964	protective	NA
KEGG_NEUROTROPHIN_SIGNALING_PATHWAY	REACTOME_ORGANELLE_BIOGENESIS_AND_MAINTENANCE	rs55702801	14	73255495	PSEN1	rs7247709	19	52240015	PPP2R1A	dominant	0.172031	0.211987	1.28995	0.772357	protective	NA
KEGG_NEUROTROPHIN_SIGNALING_PATHWAY	REACTOME_ORGANELLE_BIOGENESIS_AND_MAINTENANCE	rs3861824	1	58807217	JUN	rs11168720	12	49146750	TUBA1A/TUBA1B	dominant	0.0887902	0.116537	1.28934	0.738704	protective	NA
KEGG_NEUROTROPHIN_SIGNALING_PATHWAY	REACTOME_ORGANELLE_BIOGENESIS_AND_MAINTENANCE	rs7805383	7	140908104	BRAF	rs112830612	9	19007971	HAUS6	dominant	0.126526	0.158713	1.28926	0.767827	protective	NA
KEGG_NEUROTROPHIN_SIGNALING_PATHWAY	REACTOME_ORGANELLE_BIOGENESIS_AND_MAINTENANCE	rs7497619	15	49007401	SHC4	rs34782630	7	129593069	NRF1	dominant	0.0921199	0.123196	1.28903	0.722152	protective	NA
KEGG_NEUROTROPHIN_SIGNALING_PATHWAY	REACTOME_ORGANELLE_BIOGENESIS_AND_MAINTENANCE	rs529025836	17	63636272	MAP3K3	rs37815	16	3455912	CLUAP1	recessive_dominant	0.0610433	0.0887902	1.28856	0.667184	protective	NA
KEGG_NEUROTROPHIN_SIGNALING_PATHWAY	REACTOME_ORGANELLE_BIOGENESIS_AND_MAINTENANCE	rs2169633	15	66467291	MAP2K1	rs2065994	1	243265536	SDCCAG8	recessive	0.0277469	0.0466149	1.28811	0.583687	protective	NA
KEGG_NEUROTROPHIN_SIGNALING_PATHWAY	REACTOME_ORGANELLE_BIOGENESIS_AND_MAINTENANCE	rs7076160	10	48473929	MAPK8	rs62151837	2	73390396	ALMS1	dominant	0.203108	0.240844	1.28772	0.803384	protective	NA
KEGG_NEUROTROPHIN_SIGNALING_PATHWAY	REACTOME_ORGANELLE_BIOGENESIS_AND_MAINTENANCE	rs4877972	9	88989455	SHC3	rs9348164	6	167071948	FGFR1OP	dominant	0.386238	0.429523	1.28751	0.835808	protective	NA
KEGG_NEUROTROPHIN_SIGNALING_PATHWAY	REACTOME_ORGANELLE_BIOGENESIS_AND_MAINTENANCE	rs9759629	4	113743604	CAMK2D	rs71421442	14	57152633	EXOC5	dominant	0.265261	0.305216	1.28742	0.821829	protective	NA
KEGG_NEUROTROPHIN_SIGNALING_PATHWAY	REACTOME_ORGANELLE_BIOGENESIS_AND_MAINTENANCE	rs4820983	22	31929654	YWHAH	rs11432188	9	34575985	DCTN3	recessive_dominant	0.0610433	0.0865705	1.28694	0.685958	protective	NA
KEGG_NEUROTROPHIN_SIGNALING_PATHWAY	REACTOME_ORGANELLE_BIOGENESIS_AND_MAINTENANCE	rs62315570	4	86331750	MAPK10	rs746884	20	59067268	TUBB1	recessive_dominant	0.0799112	0.113208	1.28693	0.680338	protective	NA
KEGG_NEUROTROPHIN_SIGNALING_PATHWAY	REACTOME_ORGANELLE_BIOGENESIS_AND_MAINTENANCE	rs55894401	16	81730962	PLCG2	rs2021883	7	33122453	BBS9	recessive_dominant	0.0532741	0.0776915	1.2868	0.668029	protective	NA
KEGG_NEUROTROPHIN_SIGNALING_PATHWAY	REACTOME_ORGANELLE_BIOGENESIS_AND_MAINTENANCE	rs2239798	6	36177857	MAPK13	rs36222127	17	75876781	FBF1	dominant	0.174251	0.210877	1.28656	0.789665	protective	NA
KEGG_NEUROTROPHIN_SIGNALING_PATHWAY	REACTOME_ORGANELLE_BIOGENESIS_AND_MAINTENANCE	rs12070845	1	109261850	SORT1	rs553512184	1	153989995	CRTC2	recessive_dominant	0	0.00665927	1.28624	0	protective	0.002
KEGG_NEUROTROPHIN_SIGNALING_PATHWAY	REACTOME_ORGANELLE_BIOGENESIS_AND_MAINTENANCE	rs2777926	1	156790684	NTRK1	rs73054883	19	52207932	PPP2R1A	recessive_dominant	0	0.00776915	1.28613	0	protective	NA
KEGG_NEUROTROPHIN_SIGNALING_PATHWAY	REACTOME_ORGANELLE_BIOGENESIS_AND_MAINTENANCE	rs2612043	12	66183500	IRAK3	rs12679073	8	130222310	ASAP1	recessive_dominant	0.0344062	0.0532741	1.28584	0.633214	protective	NA
KEGG_NEUROTROPHIN_SIGNALING_PATHWAY	REACTOME_ORGANELLE_BIOGENESIS_AND_MAINTENANCE	rs2517	9	130855035	ABL1	rs227911	17	64541343	POLG2	recessive_dominant	0.0432852	0.0654828	1.28552	0.64568	protective	NA
KEGG_NEUROTROPHIN_SIGNALING_PATHWAY	REACTOME_ORGANELLE_BIOGENESIS_AND_MAINTENANCE	rs529025836	17	63636272	MAP3K3	rs11180783	12	76383340	BBS10	recessive_dominant	0.128746	0.163152	1.28521	0.757953	protective	NA
KEGG_NEUROTROPHIN_SIGNALING_PATHWAY	REACTOME_ORGANELLE_BIOGENESIS_AND_MAINTENANCE	rs56002030	19	49073984	NTF4	rs11429505	8	70278596	NCOA2	dominant	0.539401	0.582686	1.28443	0.838719	protective	NA
KEGG_NEUROTROPHIN_SIGNALING_PATHWAY	REACTOME_ORGANELLE_BIOGENESIS_AND_MAINTENANCE	rs12986190	19	40273038	AKT2	rs553512184	1	153989995	CRTC2	dominant	0.294118	0.335183	1.28424	0.826435	protective	NA
KEGG_NEUROTROPHIN_SIGNALING_PATHWAY	REACTOME_ORGANELLE_BIOGENESIS_AND_MAINTENANCE	rs9786966	1	3623414	TP73	rs536327334	13	20581760	IFT88	recessive	0.0199778	0.036626	1.2839	0.536189	protective	NA
KEGG_NEUROTROPHIN_SIGNALING_PATHWAY	REACTOME_ORGANELLE_BIOGENESIS_AND_MAINTENANCE	rs12070845	1	109261850	SORT1	rs8053605	16	1594158	IFT140	recessive_dominant	0	0.00665927	1.28354	0	protective	NA
KEGG_NEUROTROPHIN_SIGNALING_PATHWAY	REACTOME_ORGANELLE_BIOGENESIS_AND_MAINTENANCE	rs139443871	19	4165336	MAP2K2	rs3806410	1	156337134	CCT3	recessive_dominant	0.0710322	0.0987791	1.28333	0.697623	protective	NA
KEGG_NEUROTROPHIN_SIGNALING_PATHWAY	REACTOME_ORGANELLE_BIOGENESIS_AND_MAINTENANCE	rs62315570	4	86331750	MAPK10	rs55924499	7	151517706	PRKAG2	dominant	0.332963	0.377358	1.28306	0.823627	protective	NA
KEGG_NEUROTROPHIN_SIGNALING_PATHWAY	REACTOME_ORGANELLE_BIOGENESIS_AND_MAINTENANCE	rs4877972	9	88989455	SHC3	rs13061728	3	97786914	ARL6	dominant	0.463929	0.514983	1.28186	0.815066	protective	NA
KEGG_NEUROTROPHIN_SIGNALING_PATHWAY	REACTOME_ORGANELLE_BIOGENESIS_AND_MAINTENANCE	rs2908290	7	44216137	CAMK2B	rs2018797	7	129210004	SMO	dominant	0.447281	0.496115	1.28152	0.82191	protective	5.373e-05
KEGG_NEUROTROPHIN_SIGNALING_PATHWAY	REACTOME_ORGANELLE_BIOGENESIS_AND_MAINTENANCE	rs2224949	14	50096560	SOS2	rs37815	16	3455912	CLUAP1	dominant	0.193119	0.229745	1.28102	0.802424	protective	NA
KEGG_NEUROTROPHIN_SIGNALING_PATHWAY	REACTOME_ORGANELLE_BIOGENESIS_AND_MAINTENANCE	rs6916254	6	136738115	MAP3K5	rs2105847	4	2271113	HAUS3	recessive_dominant	0.00554939	0.0155383	1.28077	0.353555	protective	NA
KEGG_NEUROTROPHIN_SIGNALING_PATHWAY	REACTOME_ORGANELLE_BIOGENESIS_AND_MAINTENANCE	rs11063604	12	5408423	NTF3	rs11432188	9	34575985	DCTN3	recessive_dominant	0.0099889	0.0244173	1.28045	0.403129	protective	NA
KEGG_NEUROTROPHIN_SIGNALING_PATHWAY	REACTOME_ORGANELLE_BIOGENESIS_AND_MAINTENANCE	rs139443871	19	4165336	MAP2K2	rs10402773	19	33004535	CEP89	dominant	0.463929	0.511654	1.28043	0.826002	protective	0.001
KEGG_NEUROTROPHIN_SIGNALING_PATHWAY	REACTOME_ORGANELLE_BIOGENESIS_AND_MAINTENANCE	rs2517	9	130855035	ABL1	rs55924499	7	151517706	PRKAG2	dominant	0.187569	0.225305	1.28017	0.793844	protective	NA
KEGG_NEUROTROPHIN_SIGNALING_PATHWAY	REACTOME_ORGANELLE_BIOGENESIS_AND_MAINTENANCE	rs2224949	14	50096560	SOS2	rs4959880	6	442206	EXOC2	dominant	0.304107	0.348502	1.27959	0.816942	protective	NA
KEGG_NEUROTROPHIN_SIGNALING_PATHWAY	REACTOME_ORGANELLE_BIOGENESIS_AND_MAINTENANCE	rs2803965	14	73098014	PSEN1	rs2065994	1	243265536	SDCCAG8	recessive_dominant	0.0621532	0.0865705	1.27939	0.699257	protective	NA
KEGG_NEUROTROPHIN_SIGNALING_PATHWAY	REACTOME_ORGANELLE_BIOGENESIS_AND_MAINTENANCE	rs325923	1	111691513	RAP1A	rs528424379	16	23661801	PLK1	dominant	0.120977	0.153163	1.27826	0.760934	protective	NA
KEGG_NEUROTROPHIN_SIGNALING_PATHWAY	REACTOME_ORGANELLE_BIOGENESIS_AND_MAINTENANCE	rs6094276	20	44949946	YWHAB	rs71626264	3	177098521	TBL1XR1	dominant	0.296337	0.338513	1.27773	0.82294	protective	NA
KEGG_NEUROTROPHIN_SIGNALING_PATHWAY	REACTOME_ORGANELLE_BIOGENESIS_AND_MAINTENANCE	rs7805383	7	140908104	BRAF	rs12672218	7	134088779	EXOC4	recessive_dominant	0.106548	0.139845	1.27767	0.733511	protective	7.471e-05
KEGG_NEUROTROPHIN_SIGNALING_PATHWAY	REACTOME_ORGANELLE_BIOGENESIS_AND_MAINTENANCE	rs10420028	19	58144415	ZNF274	rs1396893	8	55779322	TGS1	recessive_dominant	0.0110988	0.0255272	1.27672	0.428439	protective	NA
KEGG_NEUROTROPHIN_SIGNALING_PATHWAY	REACTOME_ORGANELLE_BIOGENESIS_AND_MAINTENANCE	rs9759629	4	113743604	CAMK2D	rs142436966	2	74351590	DCTN1	recessive	0.00887902	0.0221976	1.27586	0.394625	protective	NA
KEGG_NEUROTROPHIN_SIGNALING_PATHWAY	REACTOME_ORGANELLE_BIOGENESIS_AND_MAINTENANCE	rs2224949	14	50096560	SOS2	rs62151837	2	73390396	ALMS1	dominant	0.346282	0.388457	1.27556	0.833917	protective	NA
KEGG_NEUROTROPHIN_SIGNALING_PATHWAY	REACTOME_ORGANELLE_BIOGENESIS_AND_MAINTENANCE	rs9521149	13	109715612	IRS2	rs200502024	3	121820354	IQCB1	recessive	0.00110988	0.0110988	1.27542	0.099	protective	NA
KEGG_NEUROTROPHIN_SIGNALING_PATHWAY	REACTOME_ORGANELLE_BIOGENESIS_AND_MAINTENANCE	rs4144887	6	166747512	RPS6KA2	rs7438356	4	15624770	CC2D2A	recessive_dominant	0.0677026	0.0932297	1.27539	0.706307	protective	NA
KEGG_NEUROTROPHIN_SIGNALING_PATHWAY	REACTOME_ORGANELLE_BIOGENESIS_AND_MAINTENANCE	rs557328	19	7902965	MAP2K7	rs36222127	17	75876781	FBF1	dominant	0.241953	0.286349	1.27519	0.795476	protective	NA
KEGG_NEUROTROPHIN_SIGNALING_PATHWAY	REACTOME_ORGANELLE_BIOGENESIS_AND_MAINTENANCE	rs55702801	14	73255495	PSEN1	rs4917904	10	102447292	ACTR1A	recessive_dominant	0.0155383	0.0344062	1.27477	0.442957	protective	NA
KEGG_NEUROTROPHIN_SIGNALING_PATHWAY	REACTOME_ORGANELLE_BIOGENESIS_AND_MAINTENANCE	rs4144887	6	166747512	RPS6KA2	rs2369963	3	132730101	NPHP3	recessive_dominant	0.0699223	0.0965594	1.27474	0.703399	protective	NA
KEGG_NEUROTROPHIN_SIGNALING_PATHWAY	REACTOME_ORGANELLE_BIOGENESIS_AND_MAINTENANCE	rs3128321	1	1953252	CALML6	rs2021883	7	33122453	BBS9	recessive	0.00443951	0.0144284	1.27457	0.304605	protective	NA
KEGG_NEUROTROPHIN_SIGNALING_PATHWAY	REACTOME_ORGANELLE_BIOGENESIS_AND_MAINTENANCE	rs7222654	17	8932404	PIK3R5	rs200118470	16	15672080	NDE1	recessive_dominant	0.00554939	0.0166482	1.2745	0.329613	protective	NA
KEGG_NEUROTROPHIN_SIGNALING_PATHWAY	REACTOME_ORGANELLE_BIOGENESIS_AND_MAINTENANCE	rs629608	1	111738116	RAP1A	rs62151837	2	73390396	ALMS1	recessive	0.017758	0.0332963	1.27447	0.524896	protective	NA
KEGG_NEUROTROPHIN_SIGNALING_PATHWAY	REACTOME_ORGANELLE_BIOGENESIS_AND_MAINTENANCE	rs201635960	5	180199887	MAPK9	rs1611011	13	20695628	IFT88	recessive_dominant	0.0499445	0.0721421	1.27437	0.676132	protective	NA
KEGG_NEUROTROPHIN_SIGNALING_PATHWAY	REACTOME_ORGANELLE_BIOGENESIS_AND_MAINTENANCE	rs7033070	9	131586374	RAPGEF1	rs7943261	11	95767956	CEP57	dominant	0.142064	0.1798	1.2738	0.75537	protective	NA
KEGG_NEUROTROPHIN_SIGNALING_PATHWAY	REACTOME_ORGANELLE_BIOGENESIS_AND_MAINTENANCE	rs4877972	9	88989455	SHC3	rs10812525	9	27084462	IFT74	dominant	0.420644	0.463929	1.27368	0.838957	protective	2.908e-04
KEGG_NEUROTROPHIN_SIGNALING_PATHWAY	REACTOME_ORGANELLE_BIOGENESIS_AND_MAINTENANCE	rs72765496	5	56945800	MAP3K1	rs59972802	17	2672013	PAFAH1B1	recessive_dominant	0.00110988	1	1.27322	0	protective	NA
KEGG_NEUROTROPHIN_SIGNALING_PATHWAY	REACTOME_ORGANELLE_BIOGENESIS_AND_MAINTENANCE	rs325923	1	111691513	RAP1A	rs2130923	4	23781504	PPARGC1A	dominant	0.235294	0.27525	1.27302	0.810174	protective	NA
KEGG_NEUROTROPHIN_SIGNALING_PATHWAY	REACTOME_ORGANELLE_BIOGENESIS_AND_MAINTENANCE	rs557328	19	7902965	MAP2K7	rs11985061	8	130359659	ASAP1	dominant	0.355161	0.402886	1.27295	0.816299	protective	NA
KEGG_NEUROTROPHIN_SIGNALING_PATHWAY	REACTOME_ORGANELLE_BIOGENESIS_AND_MAINTENANCE	rs2169633	15	66467291	MAP2K1	rs2847251	18	12751036	CEP76	recessive_dominant	0.0477248	0.0699223	1.2729	0.66663	protective	NA
KEGG_NEUROTROPHIN_SIGNALING_PATHWAY	REACTOME_ORGANELLE_BIOGENESIS_AND_MAINTENANCE	rs4144887	6	166747512	RPS6KA2	rs2655172	8	70154581	NCOA2	recessive_dominant	0.0843507	0.122087	1.27263	0.662435	protective	NA
KEGG_NEUROTROPHIN_SIGNALING_PATHWAY	REACTOME_ORGANELLE_BIOGENESIS_AND_MAINTENANCE	rs2169633	15	66467291	MAP2K1	rs7562959	2	121577641	CLASP1	recessive_dominant	0.00665927	0.0122087	1.27262	0.542407	protective	NA
KEGG_NEUROTROPHIN_SIGNALING_PATHWAY	REACTOME_ORGANELLE_BIOGENESIS_AND_MAINTENANCE	rs76430287	6	136548799	MAP3K5	rs113582339	7	151529654	PRKAG2	recessive_dominant	0.00110988	0.00887902	1.272	0.124028	protective	NA
KEGG_NEUROTROPHIN_SIGNALING_PATHWAY	REACTOME_ORGANELLE_BIOGENESIS_AND_MAINTENANCE	rs11063604	12	5408423	NTF3	rs7214893	17	76140308	EXOC7	recessive_dominant	0.0221976	0.0399556	1.27184	0.545466	protective	NA
KEGG_NEUROTROPHIN_SIGNALING_PATHWAY	REACTOME_ORGANELLE_BIOGENESIS_AND_MAINTENANCE	rs9347129	6	166895934	RPS6KA2	rs7783031	7	151590143	PRKAG2	recessive_dominant	0.00887902	0.0221976	1.271	0.394625	protective	NA
KEGG_NEUROTROPHIN_SIGNALING_PATHWAY	REACTOME_ORGANELLE_BIOGENESIS_AND_MAINTENANCE	rs55967668	5	68241438	PIK3R1	rs533119830	22	40656205	MCHR1	dominant	0.173141	0.207547	1.2705	0.799512	protective	NA
KEGG_NEUROTROPHIN_SIGNALING_PATHWAY	REACTOME_ORGANELLE_BIOGENESIS_AND_MAINTENANCE	rs7805383	7	140908104	BRAF	rs71626264	3	177098521	TBL1XR1	dominant	0.429523	0.472808	1.27042	0.839522	protective	NA
KEGG_NEUROTROPHIN_SIGNALING_PATHWAY	REACTOME_ORGANELLE_BIOGENESIS_AND_MAINTENANCE	rs4877972	9	88989455	SHC3	rs34487560	4	56029268	CEP135	dominant	0.439512	0.482797	1.27039	0.840041	protective	NA
KEGG_NEUROTROPHIN_SIGNALING_PATHWAY	REACTOME_ORGANELLE_BIOGENESIS_AND_MAINTENANCE	rs998521	15	66407072	MAP2K1	rs1709535	5	616781	CEP72	dominant	0.227525	0.277469	1.27021	0.766983	protective	NA
KEGG_NEUROTROPHIN_SIGNALING_PATHWAY	REACTOME_ORGANELLE_BIOGENESIS_AND_MAINTENANCE	rs56002030	19	49073984	NTF4	rs55924499	7	151517706	PRKAG2	dominant	0.408435	0.45172	1.27014	0.838018	protective	NA
KEGG_NEUROTROPHIN_SIGNALING_PATHWAY	REACTOME_ORGANELLE_BIOGENESIS_AND_MAINTENANCE	rs1902716	10	48395086	MAPK8	rs73916491	20	59046695	TUBB1	recessive_dominant	0.00332963	0.0133185	1.26934	0.247494	protective	NA
KEGG_NEUROTROPHIN_SIGNALING_PATHWAY	REACTOME_ORGANELLE_BIOGENESIS_AND_MAINTENANCE	rs545970	6	44239677	NFKBIE	rs1611011	13	20695628	IFT88	recessive_dominant	0.0410655	0.063263	1.26878	0.634097	protective	NA
KEGG_NEUROTROPHIN_SIGNALING_PATHWAY	REACTOME_ORGANELLE_BIOGENESIS_AND_MAINTENANCE	rs139443871	19	4165336	MAP2K2	rs17166570	5	132660439	KIF3A	dominant	0.0599334	0.0899001	1.26877	0.645415	protective	NA
KEGG_NEUROTROPHIN_SIGNALING_PATHWAY	REACTOME_ORGANELLE_BIOGENESIS_AND_MAINTENANCE	rs11102837	1	115346655	NGF	rs10421830	19	45210634	MARK4	recessive	0.00665927	0.0188679	1.26825	0.348603	protective	NA
KEGG_NEUROTROPHIN_SIGNALING_PATHWAY	REACTOME_ORGANELLE_BIOGENESIS_AND_MAINTENANCE	rs7497619	15	49007401	SHC4	rs73094828	20	32316895	KIF3B	dominant	0.0832408	0.110988	1.26807	0.7273	protective	NA
KEGG_NEUROTROPHIN_SIGNALING_PATHWAY	REACTOME_ORGANELLE_BIOGENESIS_AND_MAINTENANCE	rs76273626	18	63123969	BCL2	rs72742147	9	78289116	CEP78	recessive_dominant	0	0.00665927	1.268	0	protective	NA
KEGG_NEUROTROPHIN_SIGNALING_PATHWAY	REACTOME_ORGANELLE_BIOGENESIS_AND_MAINTENANCE	rs7805383	7	140908104	BRAF	rs6432044	2	10041284	CYS1	recessive_dominant	0.0965594	0.132075	1.26766	0.702352	protective	NA
KEGG_NEUROTROPHIN_SIGNALING_PATHWAY	REACTOME_ORGANELLE_BIOGENESIS_AND_MAINTENANCE	rs998521	15	66407072	MAP2K1	rs4959880	6	442206	EXOC2	dominant	0.17869	0.225305	1.26741	0.748089	protective	NA
KEGG_NEUROTROPHIN_SIGNALING_PATHWAY	REACTOME_ORGANELLE_BIOGENESIS_AND_MAINTENANCE	rs4144887	6	166747512	RPS6KA2	rs71421442	14	57152633	EXOC5	dominant	0.224195	0.261931	1.2673	0.814299	protective	NA
KEGG_NEUROTROPHIN_SIGNALING_PATHWAY	REACTOME_ORGANELLE_BIOGENESIS_AND_MAINTENANCE	rs1007802	1	206735691	MAPKAPK2	rs72742147	9	78289116	CEP78	dominant	0.0743618	0.099889	1.26726	0.723914	protective	NA
KEGG_NEUROTROPHIN_SIGNALING_PATHWAY	REACTOME_ORGANELLE_BIOGENESIS_AND_MAINTENANCE	rs1245510	10	73799959	CAMK2G	rs57156634	11	103446048	DYNC2H1	dominant	0.104329	0.135405	1.26682	0.743759	protective	NA
KEGG_NEUROTROPHIN_SIGNALING_PATHWAY	REACTOME_ORGANELLE_BIOGENESIS_AND_MAINTENANCE	rs1007802	1	206735691	MAPKAPK2	rs1365962	2	218857832	PRKAG3	recessive_dominant	0.109878	0.139845	1.26677	0.759263	protective	NA
KEGG_NEUROTROPHIN_SIGNALING_PATHWAY	REACTOME_ORGANELLE_BIOGENESIS_AND_MAINTENANCE	rs6916254	6	136738115	MAP3K5	rs10883462	10	102095122	PPRC1	recessive_dominant	0.0122087	0.0188679	1.26619	0.642697	protective	NA
KEGG_NEUROTROPHIN_SIGNALING_PATHWAY	REACTOME_ORGANELLE_BIOGENESIS_AND_MAINTENANCE	rs629608	1	111738116	RAP1A	rs4679312	3	126676788	CHCHD6	recessive	0.0344062	0.0532741	1.26511	0.633214	protective	NA
KEGG_NEUROTROPHIN_SIGNALING_PATHWAY	REACTOME_ORGANELLE_BIOGENESIS_AND_MAINTENANCE	rs200089036	19	38902723	NFKBIB	rs11429505	8	70278596	NCOA2	recessive_dominant	0.138735	0.169811	1.26458	0.787514	protective	NA
KEGG_NEUROTROPHIN_SIGNALING_PATHWAY	REACTOME_ORGANELLE_BIOGENESIS_AND_MAINTENANCE	rs2224949	14	50096560	SOS2	rs2489138	1	156526564	MEF2D	dominant	0.391787	0.441731	1.26356	0.814102	protective	NA
KEGG_NEUROTROPHIN_SIGNALING_PATHWAY	REACTOME_ORGANELLE_BIOGENESIS_AND_MAINTENANCE	rs9759629	4	113743604	CAMK2D	rs71626264	3	177098521	TBL1XR1	recessive_dominant	0.0976693	0.127636	1.26314	0.739804	protective	NA
KEGG_NEUROTROPHIN_SIGNALING_PATHWAY	REACTOME_ORGANELLE_BIOGENESIS_AND_MAINTENANCE	rs2169633	15	66467291	MAP2K1	rs10421830	19	45210634	MARK4	dominant	0.207547	0.248613	1.26297	0.79156	protective	NA
KEGG_NEUROTROPHIN_SIGNALING_PATHWAY	REACTOME_ORGANELLE_BIOGENESIS_AND_MAINTENANCE	rs9947044	18	63263494	BCL2	rs200502024	3	121820354	IQCB1	recessive_dominant	0.00887902	0.0233074	1.26244	0.375407	protective	NA
KEGG_NEUROTROPHIN_SIGNALING_PATHWAY	REACTOME_ORGANELLE_BIOGENESIS_AND_MAINTENANCE	rs201635960	5	180199887	MAPK9	rs5756349	22	37196680	SSTR3	recessive_dominant	0.128746	0.162042	1.26222	0.764157	protective	NA
KEGG_NEUROTROPHIN_SIGNALING_PATHWAY	REACTOME_ORGANELLE_BIOGENESIS_AND_MAINTENANCE	rs2169633	15	66467291	MAP2K1	rs4726122	7	151675463	PRKAG2	recessive_dominant	0.082131	0.109878	1.26193	0.724879	protective	NA
KEGG_NEUROTROPHIN_SIGNALING_PATHWAY	REACTOME_ORGANELLE_BIOGENESIS_AND_MAINTENANCE	rs2227485	12	68647713	RAP1B	rs1365962	2	218857832	PRKAG3	recessive_dominant	0.114317	0.147614	1.26184	0.745322	protective	NA
KEGG_NEUROTROPHIN_SIGNALING_PATHWAY	REACTOME_ORGANELLE_BIOGENESIS_AND_MAINTENANCE	rs2517	9	130855035	ABL1	rs9329423	1	5828193	NPHP4	recessive_dominant	0.0166482	0.0321865	1.26183	0.509068	protective	NA
KEGG_NEUROTROPHIN_SIGNALING_PATHWAY	REACTOME_ORGANELLE_BIOGENESIS_AND_MAINTENANCE	rs4791329	17	7693455	TP53	rs6961764	7	133131298	CHCHD3	recessive_dominant	0.105438	0.135405	1.26178	0.752603	protective	NA
KEGG_NEUROTROPHIN_SIGNALING_PATHWAY	REACTOME_ORGANELLE_BIOGENESIS_AND_MAINTENANCE	rs2224949	14	50096560	SOS2	rs528424379	16	23661801	PLK1	dominant	0.126526	0.157603	1.26172	0.774254	protective	NA
KEGG_NEUROTROPHIN_SIGNALING_PATHWAY	REACTOME_ORGANELLE_BIOGENESIS_AND_MAINTENANCE	rs10806852	6	166864334	RPS6KA2	rs1396893	8	55779322	TGS1	recessive	0.00332963	0.0133185	1.26167	0.247494	protective	NA
KEGG_NEUROTROPHIN_SIGNALING_PATHWAY	REACTOME_ORGANELLE_BIOGENESIS_AND_MAINTENANCE	rs2075076	7	44274642	CAMK2B	rs7833836	8	17935642	PCM1	recessive_dominant	0.0599334	0.0832408	1.26164	0.702149	protective	NA
KEGG_NEUROTROPHIN_SIGNALING_PATHWAY	REACTOME_ORGANELLE_BIOGENESIS_AND_MAINTENANCE	rs2087072	1	243829549	AKT3	rs2072826	6	135253558	AHI1	recessive	0.0099889	0.0244173	1.26123	0.403129	protective	NA
KEGG_NEUROTROPHIN_SIGNALING_PATHWAY	REACTOME_ORGANELLE_BIOGENESIS_AND_MAINTENANCE	rs531967415	1	114764150	NRAS	rs12819938	12	119702178	PRKAB1	recessive	0.0388457	0.0599334	1.26084	0.633928	protective	NA
KEGG_NEUROTROPHIN_SIGNALING_PATHWAY	REACTOME_ORGANELLE_BIOGENESIS_AND_MAINTENANCE	rs56002030	19	49073984	NTF4	rs12935211	16	58015332	CNGB1	dominant	0.477248	0.520533	1.2606	0.840927	protective	NA
KEGG_NEUROTROPHIN_SIGNALING_PATHWAY	REACTOME_ORGANELLE_BIOGENESIS_AND_MAINTENANCE	rs7033070	9	131586374	RAPGEF1	rs1396893	8	55779322	TGS1	recessive_dominant	0.0688124	0.0932297	1.26058	0.718741	protective	NA
KEGG_NEUROTROPHIN_SIGNALING_PATHWAY	REACTOME_ORGANELLE_BIOGENESIS_AND_MAINTENANCE	rs4144887	6	166747512	RPS6KA2	rs536327334	13	20581760	IFT88	recessive_dominant	0.0577137	0.0810211	1.25954	0.694709	protective	NA
KEGG_NEUROTROPHIN_SIGNALING_PATHWAY	REACTOME_ORGANELLE_BIOGENESIS_AND_MAINTENANCE	rs4474932	2	47159123	CALM2	rs1204507	16	464377	RAB11FIP3	recessive	0	0.00554939	1.25942	0	protective	NA
KEGG_NEUROTROPHIN_SIGNALING_PATHWAY	REACTOME_ORGANELLE_BIOGENESIS_AND_MAINTENANCE	rs2803965	14	73098014	PSEN1	rs2847251	18	12751036	CEP76	recessive_dominant	0.0233074	0.0432852	1.259	0.527448	protective	NA
KEGG_NEUROTROPHIN_SIGNALING_PATHWAY	REACTOME_ORGANELLE_BIOGENESIS_AND_MAINTENANCE	rs62044000	16	81927776	PLCG2	rs533119830	22	40656205	MCHR1	recessive_dominant	0.00221976	1	1.25809	0	protective	NA
KEGG_NEUROTROPHIN_SIGNALING_PATHWAY	REACTOME_ORGANELLE_BIOGENESIS_AND_MAINTENANCE	rs557328	19	7902965	MAP2K7	rs3806410	1	156337134	CCT3	recessive_dominant	0.0554939	0.0788013	1.25741	0.686847	protective	NA
KEGG_NEUROTROPHIN_SIGNALING_PATHWAY	REACTOME_ORGANELLE_BIOGENESIS_AND_MAINTENANCE	rs45596236	3	53220569	PRKCD	rs2655172	8	70154581	NCOA2	recessive_dominant	0.0699223	0.105438	1.2567	0.637834	protective	NA
KEGG_NEUROTROPHIN_SIGNALING_PATHWAY	REACTOME_ORGANELLE_BIOGENESIS_AND_MAINTENANCE	rs557328	19	7902965	MAP2K7	rs11144552	9	78262765	CEP78	recessive_dominant	0.0144284	0.0299667	1.25647	0.473891	protective	NA
KEGG_NEUROTROPHIN_SIGNALING_PATHWAY	REACTOME_ORGANELLE_BIOGENESIS_AND_MAINTENANCE	rs17051913	9	89061524	SHC3	rs76940793	3	160447833	IFT80	dominant	0.0266371	0.0443951	1.25618	0.589054	protective	NA
KEGG_NEUROTROPHIN_SIGNALING_PATHWAY	REACTOME_ORGANELLE_BIOGENESIS_AND_MAINTENANCE	rs629608	1	111738116	RAP1A	rs4936388	11	117440404	CEP164	recessive_dominant	0.0599334	0.0843507	1.25567	0.692071	protective	NA
KEGG_NEUROTROPHIN_SIGNALING_PATHWAY	REACTOME_ORGANELLE_BIOGENESIS_AND_MAINTENANCE	rs3128321	1	1953252	CALML6	rs10402773	19	33004535	CEP89	recessive	0.00443951	0.0144284	1.25506	0.304605	protective	NA
KEGG_NEUROTROPHIN_SIGNALING_PATHWAY	REACTOME_ORGANELLE_BIOGENESIS_AND_MAINTENANCE	rs78011207	2	226712412	IRS1	rs7798741	7	33585000	BBS9	recessive	0.017758	0.0332963	1.25487	0.524896	protective	NA
KEGG_NEUROTROPHIN_SIGNALING_PATHWAY	REACTOME_ORGANELLE_BIOGENESIS_AND_MAINTENANCE	rs200089036	19	38902723	NFKBIB	rs11707509	3	196346629	TCTEX1D2	recessive_dominant	0.0965594	0.125416	1.25352	0.74532	protective	NA
KEGG_NEUROTROPHIN_SIGNALING_PATHWAY	REACTOME_ORGANELLE_BIOGENESIS_AND_MAINTENANCE	rs8142362	22	20979079	CRKL	rs34487560	4	56029268	CEP135	dominant	0.339623	0.386238	1.25296	0.817241	protective	NA
KEGG_NEUROTROPHIN_SIGNALING_PATHWAY	REACTOME_ORGANELLE_BIOGENESIS_AND_MAINTENANCE	rs6094276	20	44949946	YWHAB	rs12819938	12	119702178	PRKAB1	recessive_dominant	0.108768	0.138735	1.25241	0.757639	protective	NA
KEGG_NEUROTROPHIN_SIGNALING_PATHWAY	REACTOME_ORGANELLE_BIOGENESIS_AND_MAINTENANCE	rs10806852	6	166864334	RPS6KA2	rs979802	11	103388805	DYNC2H1	dominant	0.164262	0.203108	1.25241	0.771152	protective	NA
KEGG_NEUROTROPHIN_SIGNALING_PATHWAY	REACTOME_ORGANELLE_BIOGENESIS_AND_MAINTENANCE	rs2908290	7	44216137	CAMK2B	rs11429505	8	70278596	NCOA2	recessive_dominant	0.134295	0.165372	1.25208	0.782929	protective	NA
KEGG_NEUROTROPHIN_SIGNALING_PATHWAY	REACTOME_ORGANELLE_BIOGENESIS_AND_MAINTENANCE	rs200089036	19	38902723	NFKBIB	rs11168720	12	49146750	TUBA1A/TUBA1B	recessive_dominant	0.0832408	0.110988	1.25205	0.7273	protective	NA
KEGG_NEUROTROPHIN_SIGNALING_PATHWAY	REACTOME_ORGANELLE_BIOGENESIS_AND_MAINTENANCE	rs998521	15	66407072	MAP2K1	rs4870327	6	155281493	TFB1M	dominant	0.18091	0.227525	1.25155	0.749871	protective	NA
KEGG_NEUROTROPHIN_SIGNALING_PATHWAY	REACTOME_ORGANELLE_BIOGENESIS_AND_MAINTENANCE	rs2803965	14	73098014	PSEN1	rs10416968	19	41407637	B9D2	recessive_dominant	0.054384	0.0788013	1.25121	0.67232	protective	NA
KEGG_NEUROTROPHIN_SIGNALING_PATHWAY	REACTOME_ORGANELLE_BIOGENESIS_AND_MAINTENANCE	rs201635960	5	180199887	MAPK9	rs896806	2	19961843	WDR35	recessive_dominant	0.0588235	0.0832408	1.25119	0.688333	protective	NA
KEGG_NEUROTROPHIN_SIGNALING_PATHWAY	REACTOME_ORGANELLE_BIOGENESIS_AND_MAINTENANCE	rs7522448	1	109279791	SORT1	rs112830612	9	19007971	HAUS6	dominant	0.100999	0.137625	1.25072	0.703973	protective	NA
KEGG_NEUROTROPHIN_SIGNALING_PATHWAY	REACTOME_ORGANELLE_BIOGENESIS_AND_MAINTENANCE	rs34137352	1	3694480	TP73	rs71421442	14	57152633	EXOC5	dominant	0.0943396	0.123196	1.25051	0.741366	protective	NA
KEGG_NEUROTROPHIN_SIGNALING_PATHWAY	REACTOME_ORGANELLE_BIOGENESIS_AND_MAINTENANCE	rs8142362	22	20979079	CRKL	rs113582339	7	151529654	PRKAG2	recessive_dominant	0.0199778	0.036626	1.25042	0.536189	protective	NA
KEGG_NEUROTROPHIN_SIGNALING_PATHWAY	REACTOME_ORGANELLE_BIOGENESIS_AND_MAINTENANCE	rs7482257	11	27755298	BDNF	rs9348164	6	167071948	FGFR1OP	recessive_dominant	0.109878	0.138735	1.25025	0.766324	protective	NA
KEGG_NEUROTROPHIN_SIGNALING_PATHWAY	REACTOME_ORGANELLE_BIOGENESIS_AND_MAINTENANCE	rs62315570	4	86331750	MAPK10	rs11168720	12	49146750	TUBA1A/TUBA1B	dominant	0.307436	0.348502	1.25004	0.829858	protective	NA
KEGG_NEUROTROPHIN_SIGNALING_PATHWAY	REACTOME_ORGANELLE_BIOGENESIS_AND_MAINTENANCE	rs200089036	19	38902723	NFKBIB	rs2065994	1	243265536	SDCCAG8	recessive_dominant	0.117647	0.148724	1.24999	0.763184	protective	NA
KEGG_NEUROTROPHIN_SIGNALING_PATHWAY	REACTOME_ORGANELLE_BIOGENESIS_AND_MAINTENANCE	rs12986190	19	40273038	AKT2	rs34144731	4	55921913	CEP135/EXOC1	dominant	0.0854606	0.113208	1.24988	0.731998	protective	NA
KEGG_NEUROTROPHIN_SIGNALING_PATHWAY	REACTOME_ORGANELLE_BIOGENESIS_AND_MAINTENANCE	rs1007802	1	206735691	MAPKAPK2	rs71421442	14	57152633	EXOC5	dominant	0.342952	0.388457	1.24956	0.821713	protective	NA
KEGG_NEUROTROPHIN_SIGNALING_PATHWAY	REACTOME_ORGANELLE_BIOGENESIS_AND_MAINTENANCE	rs2224949	14	50096560	SOS2	rs10779788	1	5945990	NPHP4	dominant	0.382908	0.426193	1.24933	0.835418	protective	NA
KEGG_NEUROTROPHIN_SIGNALING_PATHWAY	REACTOME_ORGANELLE_BIOGENESIS_AND_MAINTENANCE	rs56002030	19	49073984	NTF4	rs4679312	3	126676788	CHCHD6	dominant	0.483907	0.527192	1.24931	0.84091	protective	NA
KEGG_NEUROTROPHIN_SIGNALING_PATHWAY	REACTOME_ORGANELLE_BIOGENESIS_AND_MAINTENANCE	rs2803965	14	73098014	PSEN1	rs2311600	2	121340676	CLASP1	dominant	0.319645	0.36515	1.24871	0.816831	protective	NA
KEGG_NEUROTROPHIN_SIGNALING_PATHWAY	REACTOME_ORGANELLE_BIOGENESIS_AND_MAINTENANCE	rs759228	22	20998186	CRKL	rs11896513	2	219219183	TUBA4A/TUBA4B	dominant	0.00332963	0.0122087	1.24853	0.270298	protective	NA
KEGG_NEUROTROPHIN_SIGNALING_PATHWAY	REACTOME_ORGANELLE_BIOGENESIS_AND_MAINTENANCE	rs11063604	12	5408423	NTF3	rs4731710	7	130481474	CEP41	recessive_dominant	0.0199778	0.0399556	1.24843	0.489807	protective	NA
KEGG_NEUROTROPHIN_SIGNALING_PATHWAY	REACTOME_ORGANELLE_BIOGENESIS_AND_MAINTENANCE	rs998521	15	66407072	MAP2K1	rs6751305	2	61876220	CCT4	dominant	0.230855	0.280799	1.24839	0.768749	protective	NA
KEGG_NEUROTROPHIN_SIGNALING_PATHWAY	REACTOME_ORGANELLE_BIOGENESIS_AND_MAINTENANCE	rs78011207	2	226712412	IRS1	rs201714196	11	95748746	CEP57	recessive	0	0.00554939	1.24812	0	protective	NA
KEGG_NEUROTROPHIN_SIGNALING_PATHWAY	REACTOME_ORGANELLE_BIOGENESIS_AND_MAINTENANCE	rs7076160	10	48473929	MAPK8	rs11287280	3	45836823	LZTFL1	dominant	0.106548	0.137625	1.24782	0.747265	protective	NA
KEGG_NEUROTROPHIN_SIGNALING_PATHWAY	REACTOME_ORGANELLE_BIOGENESIS_AND_MAINTENANCE	rs3128321	1	1953252	CALML6	rs9975804	21	29058105	CCT8	recessive	0	0.00554939	1.2478	0	protective	NA
KEGG_NEUROTROPHIN_SIGNALING_PATHWAY	REACTOME_ORGANELLE_BIOGENESIS_AND_MAINTENANCE	rs76273626	18	63123969	BCL2	rs9294982	6	169696898	TCTE3	recessive_dominant	0.0144284	0.0221976	1.24777	0.644876	protective	NA
KEGG_NEUROTROPHIN_SIGNALING_PATHWAY	REACTOME_ORGANELLE_BIOGENESIS_AND_MAINTENANCE	rs9947044	18	63263494	BCL2	rs4936388	11	117440404	CEP164	recessive	0.00110988	0.0099889	1.24748	0.110123	protective	NA
KEGG_NEUROTROPHIN_SIGNALING_PATHWAY	REACTOME_ORGANELLE_BIOGENESIS_AND_MAINTENANCE	rs68104879	17	8896949	PIK3R5	rs11707509	3	196346629	TCTEX1D2	recessive_dominant	0.0721421	0.0987791	1.24709	0.70937	protective	NA
KEGG_NEUROTROPHIN_SIGNALING_PATHWAY	REACTOME_ORGANELLE_BIOGENESIS_AND_MAINTENANCE	rs7222654	17	8932404	PIK3R5	rs7783031	7	151590143	PRKAG2	recessive_dominant	0.0244173	0.0410655	1.24702	0.584448	protective	NA
KEGG_NEUROTROPHIN_SIGNALING_PATHWAY	REACTOME_ORGANELLE_BIOGENESIS_AND_MAINTENANCE	rs7076160	10	48473929	MAPK8	rs12935211	16	58015332	CNGB1	dominant	0.251942	0.290788	1.24684	0.82142	protective	NA
KEGG_NEUROTROPHIN_SIGNALING_PATHWAY	REACTOME_ORGANELLE_BIOGENESIS_AND_MAINTENANCE	rs3844536	19	396948	SHC2	rs201143490	9	136452021	INPP5E	dominant	0.314095	0.355161	1.24664	0.831427	protective	NA
KEGG_NEUROTROPHIN_SIGNALING_PATHWAY	REACTOME_ORGANELLE_BIOGENESIS_AND_MAINTENANCE	rs8142362	22	20979079	CRKL	rs71421442	14	57152633	EXOC5	recessive_dominant	0.0477248	0.0699223	1.24653	0.66663	protective	NA
KEGG_NEUROTROPHIN_SIGNALING_PATHWAY	REACTOME_ORGANELLE_BIOGENESIS_AND_MAINTENANCE	rs9347129	6	166895934	RPS6KA2	rs1687996	19	35587635	HAUS5	recessive_dominant	0.0155383	0.0344062	1.24634	0.442957	protective	NA
KEGG_NEUROTROPHIN_SIGNALING_PATHWAY	REACTOME_ORGANELLE_BIOGENESIS_AND_MAINTENANCE	rs7222654	17	8932404	PIK3R5	rs7626359	3	126796501	CHCHD6	recessive_dominant	0.0255272	0.0421754	1.24587	0.594923	protective	NA
KEGG_NEUROTROPHIN_SIGNALING_PATHWAY	REACTOME_ORGANELLE_BIOGENESIS_AND_MAINTENANCE	rs1018102	1	22041073	CDC42	rs10460000	18	12320551	TUBB6	recessive_dominant	0.0776915	0.104329	1.24562	0.723174	protective	NA
KEGG_NEUROTROPHIN_SIGNALING_PATHWAY	REACTOME_ORGANELLE_BIOGENESIS_AND_MAINTENANCE	rs139443871	19	4165336	MAP2K2	rs71421442	14	57152633	EXOC5	recessive_dominant	0.0743618	0.102109	1.24518	0.706431	protective	NA
KEGG_NEUROTROPHIN_SIGNALING_PATHWAY	REACTOME_ORGANELLE_BIOGENESIS_AND_MAINTENANCE	rs6094276	20	44949946	YWHAB	rs10460000	18	12320551	TUBB6	recessive_dominant	0.0588235	0.082131	1.24514	0.69848	protective	NA
KEGG_NEUROTROPHIN_SIGNALING_PATHWAY	REACTOME_ORGANELLE_BIOGENESIS_AND_MAINTENANCE	rs557328	19	7902965	MAP2K7	rs2369963	3	132730101	NPHP3	recessive_dominant	0.0665927	0.09101	1.24505	0.712566	protective	NA
KEGG_NEUROTROPHIN_SIGNALING_PATHWAY	REACTOME_ORGANELLE_BIOGENESIS_AND_MAINTENANCE	rs55894401	16	81730962	PLCG2	rs12682725	9	19146715	HAUS6	recessive_dominant	0.0344062	0.0577137	1.24503	0.581764	protective	NA
KEGG_NEUROTROPHIN_SIGNALING_PATHWAY	REACTOME_ORGANELLE_BIOGENESIS_AND_MAINTENANCE	rs2169633	15	66467291	MAP2K1	rs2790035	9	128439923	ODF2	dominant	0.400666	0.442841	1.2447	0.841093	protective	NA
KEGG_NEUROTROPHIN_SIGNALING_PATHWAY	REACTOME_ORGANELLE_BIOGENESIS_AND_MAINTENANCE	rs1018102	1	22041073	CDC42	rs890980	5	477303	EXOC3	recessive_dominant	0.162042	0.197558	1.24334	0.78546	protective	NA
KEGG_NEUROTROPHIN_SIGNALING_PATHWAY	REACTOME_ORGANELLE_BIOGENESIS_AND_MAINTENANCE	rs55967668	5	68241438	PIK3R1	rs11429505	8	70278596	NCOA2	dominant	0.214206	0.249723	1.2431	0.819008	protective	NA
KEGG_NEUROTROPHIN_SIGNALING_PATHWAY	REACTOME_ORGANELLE_BIOGENESIS_AND_MAINTENANCE	rs201635960	5	180199887	MAPK9	rs4679312	3	126676788	CHCHD6	recessive_dominant	0.0699223	0.0954495	1.24286	0.712452	protective	NA
KEGG_NEUROTROPHIN_SIGNALING_PATHWAY	REACTOME_ORGANELLE_BIOGENESIS_AND_MAINTENANCE	rs71166958	19	4089029	MAP2K2	rs4936388	11	117440404	CEP164	recessive_dominant	0.0099889	0.0221976	1.24279	0.444451	protective	NA
KEGG_NEUROTROPHIN_SIGNALING_PATHWAY	REACTOME_ORGANELLE_BIOGENESIS_AND_MAINTENANCE	rs13322072	3	179282730	PIK3CA	rs10812525	9	27084462	IFT74	dominant	0.36404	0.411765	1.24248	0.817751	protective	NA
KEGG_NEUROTROPHIN_SIGNALING_PATHWAY	REACTOME_ORGANELLE_BIOGENESIS_AND_MAINTENANCE	rs147511193	3	119945039	GSK3B	rs1204507	16	464377	RAB11FIP3	recessive	0	0.00554939	1.24246	0	protective	NA
KEGG_NEUROTROPHIN_SIGNALING_PATHWAY	REACTOME_ORGANELLE_BIOGENESIS_AND_MAINTENANCE	rs10772805	12	14912466	ARHGDIB	rs28716841	5	132733467	KIF3A	recessive_dominant	0.00110988	0.00332963	1.24239	0.332593	protective	NA
KEGG_NEUROTROPHIN_SIGNALING_PATHWAY	REACTOME_ORGANELLE_BIOGENESIS_AND_MAINTENANCE	rs55894401	16	81730962	PLCG2	rs6961764	7	133131298	CHCHD3	recessive_dominant	0.0610433	0.0854606	1.2422	0.695711	protective	NA
KEGG_NEUROTROPHIN_SIGNALING_PATHWAY	REACTOME_ORGANELLE_BIOGENESIS_AND_MAINTENANCE	rs1902716	10	48395086	MAPK8	rs896806	2	19961843	WDR35	dominant	0.266371	0.306326	1.24205	0.822206	protective	NA
KEGG_NEUROTROPHIN_SIGNALING_PATHWAY	REACTOME_ORGANELLE_BIOGENESIS_AND_MAINTENANCE	rs2803965	14	73098014	PSEN1	rs12679073	8	130222310	ASAP1	dominant	0.283019	0.324084	1.24201	0.82327	protective	NA
KEGG_NEUROTROPHIN_SIGNALING_PATHWAY	REACTOME_ORGANELLE_BIOGENESIS_AND_MAINTENANCE	rs200089036	19	38902723	NFKBIB	rs12935211	16	58015332	CNGB1	recessive_dominant	0.112098	0.140954	1.24095	0.769429	protective	NA
KEGG_NEUROTROPHIN_SIGNALING_PATHWAY	REACTOME_ORGANELLE_BIOGENESIS_AND_MAINTENANCE	rs2239798	6	36177857	MAPK13	rs11287280	3	45836823	LZTFL1	dominant	0.0876804	0.114317	1.24082	0.744596	protective	NA
KEGG_NEUROTROPHIN_SIGNALING_PATHWAY	REACTOME_ORGANELLE_BIOGENESIS_AND_MAINTENANCE	rs6072793	20	41185524	PLCG1	rs12302358	12	110239437	IFT81	recessive_dominant	0.0122087	0.0255272	1.24033	0.471812	protective	NA
KEGG_NEUROTROPHIN_SIGNALING_PATHWAY	REACTOME_ORGANELLE_BIOGENESIS_AND_MAINTENANCE	rs17051913	9	89061524	SHC3	rs4655200	1	20672101	KIF17	dominant	0.168701	0.203108	1.24001	0.796224	protective	NA
KEGG_NEUROTROPHIN_SIGNALING_PATHWAY	REACTOME_ORGANELLE_BIOGENESIS_AND_MAINTENANCE	rs1902716	10	48395086	MAPK8	rs2388229	16	53556997	RPGRIP1L	dominant	0.288568	0.328524	1.23971	0.829047	protective	NA
KEGG_NEUROTROPHIN_SIGNALING_PATHWAY	REACTOME_ORGANELLE_BIOGENESIS_AND_MAINTENANCE	rs2537850	14	90970875	RPS6KA5	rs16996724	22	36772774	IFT27	dominant	0.0499445	0.0788013	1.23928	0.614552	protective	NA
KEGG_NEUROTROPHIN_SIGNALING_PATHWAY	REACTOME_ORGANELLE_BIOGENESIS_AND_MAINTENANCE	rs6916254	6	136738115	MAP3K5	rs62151837	2	73390396	ALMS1	dominant	0.139845	0.173141	1.23865	0.776427	protective	NA
KEGG_NEUROTROPHIN_SIGNALING_PATHWAY	REACTOME_ORGANELLE_BIOGENESIS_AND_MAINTENANCE	rs557328	19	7902965	MAP2K7	rs7438356	4	15624770	CC2D2A	dominant	0.287458	0.332963	1.23864	0.808198	protective	NA
KEGG_NEUROTROPHIN_SIGNALING_PATHWAY	REACTOME_ORGANELLE_BIOGENESIS_AND_MAINTENANCE	rs2169633	15	66467291	MAP2K1	rs979802	11	103388805	DYNC2H1	recessive	0.0244173	0.0421754	1.23806	0.568409	protective	NA
KEGG_NEUROTROPHIN_SIGNALING_PATHWAY	REACTOME_ORGANELLE_BIOGENESIS_AND_MAINTENANCE	rs2075076	7	44274642	CAMK2B	rs10883462	10	102095122	PPRC1	recessive_dominant	0.0577137	0.0799112	1.23781	0.705209	protective	NA
KEGG_NEUROTROPHIN_SIGNALING_PATHWAY	REACTOME_ORGANELLE_BIOGENESIS_AND_MAINTENANCE	rs8073151	17	1495834	CRK	rs13288249	9	78211618	CEP78	recessive	0.00776915	0.0210877	1.23667	0.363476	protective	NA
KEGG_NEUROTROPHIN_SIGNALING_PATHWAY	REACTOME_ORGANELLE_BIOGENESIS_AND_MAINTENANCE	rs7805383	7	140908104	BRAF	rs17017668	1	211694508	NEK2	recessive_dominant	0.00332963	0.00665927	1.23648	0.49833	protective	NA
KEGG_NEUROTROPHIN_SIGNALING_PATHWAY	REACTOME_ORGANELLE_BIOGENESIS_AND_MAINTENANCE	rs36133170	6	166600960	RPS6KA2	rs7476037	10	5376275	TUBAL3	recessive_dominant	0.00221976	0.0099889	1.2363	0.220492	protective	NA
KEGG_NEUROTROPHIN_SIGNALING_PATHWAY	REACTOME_ORGANELLE_BIOGENESIS_AND_MAINTENANCE	rs2517	9	130855035	ABL1	rs7438356	4	15624770	CC2D2A	dominant	0.207547	0.243063	1.23609	0.815612	protective	NA
KEGG_NEUROTROPHIN_SIGNALING_PATHWAY	REACTOME_ORGANELLE_BIOGENESIS_AND_MAINTENANCE	rs629608	1	111738116	RAP1A	rs2847251	18	12751036	CEP76	recessive_dominant	0.0321865	0.0488346	1.23595	0.647753	protective	NA
KEGG_NEUROTROPHIN_SIGNALING_PATHWAY	REACTOME_ORGANELLE_BIOGENESIS_AND_MAINTENANCE	rs78011207	2	226712412	IRS1	rs55924499	7	151517706	PRKAG2	recessive_dominant	0.0388457	0.0588235	1.23594	0.646651	protective	NA
KEGG_NEUROTROPHIN_SIGNALING_PATHWAY	REACTOME_ORGANELLE_BIOGENESIS_AND_MAINTENANCE	rs8073151	17	1495834	CRK	rs6751305	2	61876220	CCT4	recessive_dominant	0.160932	0.195339	1.23589	0.790081	protective	NA
KEGG_NEUROTROPHIN_SIGNALING_PATHWAY	REACTOME_ORGANELLE_BIOGENESIS_AND_MAINTENANCE	rs62315570	4	86331750	MAPK10	rs112830612	9	19007971	HAUS6	dominant	0.110988	0.140954	1.23514	0.76086	protective	NA
KEGG_NEUROTROPHIN_SIGNALING_PATHWAY	REACTOME_ORGANELLE_BIOGENESIS_AND_MAINTENANCE	rs13322072	3	179282730	PIK3CA	rs61591040	16	23680612	PLK1	recessive_dominant	0.0199778	0.0355161	1.23507	0.553582	protective	NA
KEGG_NEUROTROPHIN_SIGNALING_PATHWAY	REACTOME_ORGANELLE_BIOGENESIS_AND_MAINTENANCE	rs2517	9	130855035	ABL1	rs56071638	16	53234175	CHD9	recessive_dominant	0.0699223	0.0965594	1.23468	0.703399	protective	NA
KEGG_NEUROTROPHIN_SIGNALING_PATHWAY	REACTOME_ORGANELLE_BIOGENESIS_AND_MAINTENANCE	rs12425324	12	111407697	SH2B3	rs7438356	4	15624770	CC2D2A	recessive_dominant	0.106548	0.135405	1.23432	0.76147	protective	NA
KEGG_NEUROTROPHIN_SIGNALING_PATHWAY	REACTOME_ORGANELLE_BIOGENESIS_AND_MAINTENANCE	rs12986190	19	40273038	AKT2	rs2362419	12	94366781	CEP83	recessive_dominant	0.0588235	0.0832408	1.23426	0.688333	protective	NA
KEGG_NEUROTROPHIN_SIGNALING_PATHWAY	REACTOME_ORGANELLE_BIOGENESIS_AND_MAINTENANCE	rs55894401	16	81730962	PLCG2	rs37815	16	3455912	CLUAP1	dominant	0.160932	0.195339	1.23376	0.790081	protective	9.992e-05
KEGG_NEUROTROPHIN_SIGNALING_PATHWAY	REACTOME_ORGANELLE_BIOGENESIS_AND_MAINTENANCE	rs8073151	17	1495834	CRK	rs2072826	6	135253558	AHI1	recessive_dominant	0.0421754	0.0643729	1.23368	0.639989	protective	NA
KEGG_NEUROTROPHIN_SIGNALING_PATHWAY	REACTOME_ORGANELLE_BIOGENESIS_AND_MAINTENANCE	rs8078982	17	49485912	NGFR	rs771795	3	101718657	CEP97	recessive	0.0266371	0.0432852	1.23338	0.604859	protective	NA
KEGG_NEUROTROPHIN_SIGNALING_PATHWAY	REACTOME_ORGANELLE_BIOGENESIS_AND_MAINTENANCE	rs6924899	6	166476996	RPS6KA2	rs7943261	11	95767956	CEP57	recessive_dominant	0.0244173	0.0410655	1.23298	0.584448	protective	NA
KEGG_NEUROTROPHIN_SIGNALING_PATHWAY	REACTOME_ORGANELLE_BIOGENESIS_AND_MAINTENANCE	rs529025836	17	63636272	MAP3K3	rs227018	14	22993908	HAUS4	recessive_dominant	0.114317	0.147614	1.23298	0.745322	protective	NA
KEGG_NEUROTROPHIN_SIGNALING_PATHWAY	REACTOME_ORGANELLE_BIOGENESIS_AND_MAINTENANCE	rs3861824	1	58807217	JUN	rs9294982	6	169696898	TCTE3	dominant	0.125416	0.155383	1.23288	0.779487	protective	NA
KEGG_NEUROTROPHIN_SIGNALING_PATHWAY	REACTOME_ORGANELLE_BIOGENESIS_AND_MAINTENANCE	rs10413331	19	58203728	ZNF274	rs1821526	12	94388174	CEP83	recessive_dominant	0.036626	0.0554939	1.23264	0.647074	protective	NA
KEGG_NEUROTROPHIN_SIGNALING_PATHWAY	REACTOME_ORGANELLE_BIOGENESIS_AND_MAINTENANCE	rs529025836	17	63636272	MAP3K3	rs2671332	11	103231440	DYNC2H1	recessive_dominant	0.156493	0.192009	1.23238	0.780712	protective	NA
KEGG_NEUROTROPHIN_SIGNALING_PATHWAY	REACTOME_ORGANELLE_BIOGENESIS_AND_MAINTENANCE	rs6094276	20	44949946	YWHAB	rs28716841	5	132733467	KIF3A	dominant	0.0466149	0.0699223	1.23224	0.650369	protective	NA
KEGG_NEUROTROPHIN_SIGNALING_PATHWAY	REACTOME_ORGANELLE_BIOGENESIS_AND_MAINTENANCE	rs8142362	22	20979079	CRKL	rs34782630	7	129593069	NRF1	dominant	0.136515	0.167592	1.23199	0.785253	protective	NA
KEGG_NEUROTROPHIN_SIGNALING_PATHWAY	REACTOME_ORGANELLE_BIOGENESIS_AND_MAINTENANCE	rs7076160	10	48473929	MAPK8	rs55924499	7	151517706	PRKAG2	dominant	0.225305	0.263041	1.2317	0.814818	protective	NA
KEGG_NEUROTROPHIN_SIGNALING_PATHWAY	REACTOME_ORGANELLE_BIOGENESIS_AND_MAINTENANCE	rs1245510	10	73799959	CAMK2G	rs7476037	10	5376275	TUBAL3	recessive_dominant	0.119867	0.152053	1.23041	0.759492	protective	3.253e-04
KEGG_NEUROTROPHIN_SIGNALING_PATHWAY	REACTOME_ORGANELLE_BIOGENESIS_AND_MAINTENANCE	rs1245510	10	73799959	CAMK2G	rs536327334	13	20581760	IFT88	recessive_dominant	0.144284	0.175361	1.23012	0.792904	protective	NA
KEGG_NEUROTROPHIN_SIGNALING_PATHWAY	REACTOME_ORGANELLE_BIOGENESIS_AND_MAINTENANCE	rs4877972	9	88989455	SHC3	rs6464184	7	151625412	PRKAG2	dominant	0.316315	0.357381	1.22968	0.83193	protective	NA
KEGG_NEUROTROPHIN_SIGNALING_PATHWAY	REACTOME_ORGANELLE_BIOGENESIS_AND_MAINTENANCE	rs55967668	5	68241438	PIK3R1	rs2234182	19	6535080	TUBB4A	dominant	0.156493	0.189789	1.22959	0.792013	protective	NA
KEGG_NEUROTROPHIN_SIGNALING_PATHWAY	REACTOME_ORGANELLE_BIOGENESIS_AND_MAINTENANCE	rs4791329	17	7693455	TP53	rs1611011	13	20695628	IFT88	recessive_dominant	0.0710322	0.0976693	1.22928	0.706419	protective	NA
KEGG_NEUROTROPHIN_SIGNALING_PATHWAY	REACTOME_ORGANELLE_BIOGENESIS_AND_MAINTENANCE	rs4791329	17	7693455	TP53	rs7129263	11	248077	SIRT3	recessive_dominant	0.0432852	0.0610433	1.22928	0.695929	protective	NA
KEGG_NEUROTROPHIN_SIGNALING_PATHWAY	REACTOME_ORGANELLE_BIOGENESIS_AND_MAINTENANCE	rs10806852	6	166864334	RPS6KA2	rs7966731	12	96871649	NEDD1	recessive	0.00332963	0.0122087	1.22886	0.270298	protective	NA
KEGG_NEUROTROPHIN_SIGNALING_PATHWAY	REACTOME_ORGANELLE_BIOGENESIS_AND_MAINTENANCE	rs55702801	14	73255495	PSEN1	rs4761574	12	94503883	CEP83	dominant	0.193119	0.231964	1.22882	0.792455	protective	NA
KEGG_NEUROTROPHIN_SIGNALING_PATHWAY	REACTOME_ORGANELLE_BIOGENESIS_AND_MAINTENANCE	rs201635960	5	180199887	MAPK9	rs13410771	2	121472844	CLASP1	recessive_dominant	0.0110988	0.0255272	1.22857	0.428439	protective	NA
KEGG_NEUROTROPHIN_SIGNALING_PATHWAY	REACTOME_ORGANELLE_BIOGENESIS_AND_MAINTENANCE	rs2908290	7	44216137	CAMK2B	rs7943261	11	95767956	CEP57	dominant	0.187569	0.225305	1.22822	0.793844	protective	NA
KEGG_NEUROTROPHIN_SIGNALING_PATHWAY	REACTOME_ORGANELLE_BIOGENESIS_AND_MAINTENANCE	rs2517	9	130855035	ABL1	rs1917460	11	103527656	DYNC2H1	dominant	0.18424	0.219756	1.22813	0.801883	protective	NA
KEGG_NEUROTROPHIN_SIGNALING_PATHWAY	REACTOME_ORGANELLE_BIOGENESIS_AND_MAINTENANCE	rs12425324	12	111407697	SH2B3	rs10077397	5	88903298	MEF2C	recessive_dominant	0.0932297	0.119867	1.2281	0.75493	protective	NA
KEGG_NEUROTROPHIN_SIGNALING_PATHWAY	REACTOME_ORGANELLE_BIOGENESIS_AND_MAINTENANCE	rs2803965	14	73098014	PSEN1	rs979802	11	103388805	DYNC2H1	recessive_dominant	0.0588235	0.0810211	1.22807	0.708904	protective	NA
KEGG_NEUROTROPHIN_SIGNALING_PATHWAY	REACTOME_ORGANELLE_BIOGENESIS_AND_MAINTENANCE	rs557328	19	7902965	MAP2K7	rs112830612	9	19007971	HAUS6	dominant	0.0865705	0.119867	1.22709	0.695896	protective	NA
KEGG_NEUROTROPHIN_SIGNALING_PATHWAY	REACTOME_ORGANELLE_BIOGENESIS_AND_MAINTENANCE	rs2169633	15	66467291	MAP2K1	rs376270	16	57950057	CNGB1	recessive_dominant	0.0776915	0.104329	1.22677	0.723174	protective	NA
KEGG_NEUROTROPHIN_SIGNALING_PATHWAY	REACTOME_ORGANELLE_BIOGENESIS_AND_MAINTENANCE	rs7482257	11	27755298	BDNF	rs73054883	19	52207932	PPP2R1A	recessive_dominant	0.00332963	0.0133185	1.22676	0.247494	protective	NA
KEGG_NEUROTROPHIN_SIGNALING_PATHWAY	REACTOME_ORGANELLE_BIOGENESIS_AND_MAINTENANCE	rs2517	9	130855035	ABL1	rs34487560	4	56029268	CEP135	recessive	0.00554939	0.0155383	1.22629	0.353555	protective	NA
KEGG_NEUROTROPHIN_SIGNALING_PATHWAY	REACTOME_ORGANELLE_BIOGENESIS_AND_MAINTENANCE	rs10413331	19	58203728	ZNF274	rs36222127	17	75876781	FBF1	recessive_dominant	0.0410655	0.0610433	1.22629	0.658712	protective	NA
KEGG_NEUROTROPHIN_SIGNALING_PATHWAY	REACTOME_ORGANELLE_BIOGENESIS_AND_MAINTENANCE	rs2908290	7	44216137	CAMK2B	rs13061728	3	97786914	ARL6	recessive_dominant	0.119867	0.149834	1.22604	0.772762	protective	NA
KEGG_NEUROTROPHIN_SIGNALING_PATHWAY	REACTOME_ORGANELLE_BIOGENESIS_AND_MAINTENANCE	rs1245510	10	73799959	CAMK2G	rs7798741	7	33585000	BBS9	dominant	0.45616	0.498335	1.22581	0.84438	protective	NA
KEGG_NEUROTROPHIN_SIGNALING_PATHWAY	REACTOME_ORGANELLE_BIOGENESIS_AND_MAINTENANCE	rs13322072	3	179282730	PIK3CA	rs11419917	22	31576509	SFI1	recessive_dominant	0.0732519	0.105438	1.22571	0.670608	protective	NA
KEGG_NEUROTROPHIN_SIGNALING_PATHWAY	REACTOME_ORGANELLE_BIOGENESIS_AND_MAINTENANCE	rs11063604	12	5408423	NTF3	rs1558995	7	134041704	EXOC4	recessive_dominant	0.0277469	0.0488346	1.22513	0.555858	protective	NA
KEGG_NEUROTROPHIN_SIGNALING_PATHWAY	REACTOME_ORGANELLE_BIOGENESIS_AND_MAINTENANCE	rs557328	19	7902965	MAP2K7	rs10418927	19	16168734	RAB8A	dominant	0.335183	0.381798	1.22513	0.816351	protective	0.002
KEGG_NEUROTROPHIN_SIGNALING_PATHWAY	REACTOME_ORGANELLE_BIOGENESIS_AND_MAINTENANCE	rs9786966	1	3623414	TP73	rs4936388	11	117440404	CEP164	recessive_dominant	0.0199778	0.036626	1.22472	0.536189	protective	NA
KEGG_NEUROTROPHIN_SIGNALING_PATHWAY	REACTOME_ORGANELLE_BIOGENESIS_AND_MAINTENANCE	rs13322072	3	179282730	PIK3CA	rs11180783	12	76383340	BBS10	dominant	0.379578	0.427303	1.22455	0.81998	protective	NA
KEGG_NEUROTROPHIN_SIGNALING_PATHWAY	REACTOME_ORGANELLE_BIOGENESIS_AND_MAINTENANCE	rs2087072	1	243829549	AKT3	rs4959880	6	442206	EXOC2	recessive_dominant	0.082131	0.113208	1.22406	0.700927	protective	NA
KEGG_NEUROTROPHIN_SIGNALING_PATHWAY	REACTOME_ORGANELLE_BIOGENESIS_AND_MAINTENANCE	rs55967668	5	68241438	PIK3R1	rs4917904	10	102447292	ACTR1A	recessive_dominant	0.0133185	0.0288568	1.22403	0.45427	protective	NA
KEGG_NEUROTROPHIN_SIGNALING_PATHWAY	REACTOME_ORGANELLE_BIOGENESIS_AND_MAINTENANCE	rs59425633	2	9585705	YWHAQ	rs9294982	6	169696898	TCTE3	recessive_dominant	0.00332963	0.00776915	1.22377	0.426662	protective	NA
KEGG_NEUROTROPHIN_SIGNALING_PATHWAY	REACTOME_ORGANELLE_BIOGENESIS_AND_MAINTENANCE	rs8073151	17	1495834	CRK	rs6534321	4	122692023	BBS12	recessive_dominant	0.0277469	0.0377358	1.22368	0.72774	protective	NA
KEGG_NEUROTROPHIN_SIGNALING_PATHWAY	REACTOME_ORGANELLE_BIOGENESIS_AND_MAINTENANCE	rs7805383	7	140908104	BRAF	rs2065994	1	243265536	SDCCAG8	recessive_dominant	0.127636	0.162042	1.22335	0.756605	protective	NA
KEGG_NEUROTROPHIN_SIGNALING_PATHWAY	REACTOME_ORGANELLE_BIOGENESIS_AND_MAINTENANCE	rs2239798	6	36177857	MAPK13	rs746884	20	59067268	TUBB1	recessive_dominant	0.0210877	0.036626	1.22306	0.566619	protective	NA
KEGG_NEUROTROPHIN_SIGNALING_PATHWAY	REACTOME_ORGANELLE_BIOGENESIS_AND_MAINTENANCE	rs12923110	16	81885762	PLCG2	rs11432188	9	34575985	DCTN3	recessive_dominant	0.0499445	0.0732519	1.22252	0.665091	protective	NA
KEGG_NEUROTROPHIN_SIGNALING_PATHWAY	REACTOME_ORGANELLE_BIOGENESIS_AND_MAINTENANCE	rs12070845	1	109261850	SORT1	rs2021883	7	33122453	BBS9	recessive_dominant	0.00110988	0.00776915	1.22166	0.141905	protective	NA
KEGG_NEUROTROPHIN_SIGNALING_PATHWAY	REACTOME_ORGANELLE_BIOGENESIS_AND_MAINTENANCE	rs9347129	6	166895934	RPS6KA2	rs1709535	5	616781	CEP72	recessive_dominant	0.0110988	0.0266371	1.22042	0.41012	protective	NA
KEGG_NEUROTROPHIN_SIGNALING_PATHWAY	REACTOME_ORGANELLE_BIOGENESIS_AND_MAINTENANCE	rs7805383	7	140908104	BRAF	rs200502024	3	121820354	IQCB1	dominant	0.176471	0.210877	1.22029	0.80188	protective	NA
KEGG_NEUROTROPHIN_SIGNALING_PATHWAY	REACTOME_ORGANELLE_BIOGENESIS_AND_MAINTENANCE	rs12950747	17	8996860	PIK3R5	rs9348164	6	167071948	FGFR1OP	recessive_dominant	0.00221976	0.0099889	1.22	0.220492	protective	NA
KEGG_NEUROTROPHIN_SIGNALING_PATHWAY	REACTOME_ORGANELLE_BIOGENESIS_AND_MAINTENANCE	rs10413331	19	58203728	ZNF274	rs2369963	3	132730101	NPHP3	recessive_dominant	0.0710322	0.0987791	1.2199	0.697623	protective	NA
KEGG_NEUROTROPHIN_SIGNALING_PATHWAY	REACTOME_ORGANELLE_BIOGENESIS_AND_MAINTENANCE	rs8142362	22	20979079	CRKL	rs11668155	19	52247306	PPP2R1A	dominant	0.217536	0.253052	1.21966	0.82063	protective	NA
KEGG_NEUROTROPHIN_SIGNALING_PATHWAY	REACTOME_ORGANELLE_BIOGENESIS_AND_MAINTENANCE	rs45596236	3	53220569	PRKCD	rs57156634	11	103446048	DYNC2H1	recessive_dominant	0.00110988	0.00443951	1.21954	0.249167	protective	NA
KEGG_NEUROTROPHIN_SIGNALING_PATHWAY	REACTOME_ORGANELLE_BIOGENESIS_AND_MAINTENANCE	rs3861824	1	58807217	JUN	rs78072264	1	246568004	TFB2M	dominant	0.0144284	0.0299667	1.21928	0.473891	protective	0.001
KEGG_NEUROTROPHIN_SIGNALING_PATHWAY	REACTOME_ORGANELLE_BIOGENESIS_AND_MAINTENANCE	rs2612043	12	66183500	IRAK3	rs6464184	7	151625412	PRKAG2	dominant	0.134295	0.168701	1.21926	0.764415	protective	NA
KEGG_NEUROTROPHIN_SIGNALING_PATHWAY	REACTOME_ORGANELLE_BIOGENESIS_AND_MAINTENANCE	rs72765496	5	56945800	MAP3K1	rs7798741	7	33585000	BBS9	recessive_dominant	0.0144284	0.0277469	1.21923	0.512973	protective	NA
KEGG_NEUROTROPHIN_SIGNALING_PATHWAY	REACTOME_ORGANELLE_BIOGENESIS_AND_MAINTENANCE	rs55967668	5	68241438	PIK3R1	rs612700	11	74127339	C2CD3	recessive_dominant	0.0166482	0.0310766	1.21872	0.527854	protective	NA
KEGG_NEUROTROPHIN_SIGNALING_PATHWAY	REACTOME_ORGANELLE_BIOGENESIS_AND_MAINTENANCE	rs4791329	17	7693455	TP53	rs7214893	17	76140308	EXOC7	recessive_dominant	0.0832408	0.110988	1.21862	0.7273	protective	5.570e-05
KEGG_NEUROTROPHIN_SIGNALING_PATHWAY	REACTOME_ORGANELLE_BIOGENESIS_AND_MAINTENANCE	rs7522448	1	109279791	SORT1	rs6534321	4	122692023	BBS12	recessive_dominant	0.0144284	0.0299667	1.21815	0.473891	protective	NA
KEGG_NEUROTROPHIN_SIGNALING_PATHWAY	REACTOME_ORGANELLE_BIOGENESIS_AND_MAINTENANCE	rs67689534	1	206718845	MAPKAPK2	rs10421830	19	45210634	MARK4	recessive	0.00110988	0.0099889	1.21782	0.110123	protective	NA
KEGG_NEUROTROPHIN_SIGNALING_PATHWAY	REACTOME_ORGANELLE_BIOGENESIS_AND_MAINTENANCE	rs3128321	1	1953252	CALML6	rs7562959	2	121577641	CLASP1	recessive_dominant	0.00221976	0.0110988	1.21759	0.19822	protective	NA
KEGG_NEUROTROPHIN_SIGNALING_PATHWAY	REACTOME_ORGANELLE_BIOGENESIS_AND_MAINTENANCE	rs2517	9	130855035	ABL1	rs2655172	8	70154581	NCOA2	dominant	0.218646	0.256382	1.21665	0.811627	protective	NA
KEGG_NEUROTROPHIN_SIGNALING_PATHWAY	REACTOME_ORGANELLE_BIOGENESIS_AND_MAINTENANCE	rs8142362	22	20979079	CRKL	rs73886521	22	46273829	PPARA	dominant	0.0976693	0.125416	1.21603	0.754814	protective	4.040e-04
KEGG_NEUROTROPHIN_SIGNALING_PATHWAY	REACTOME_ORGANELLE_BIOGENESIS_AND_MAINTENANCE	rs1007802	1	206735691	MAPKAPK2	rs528424379	16	23661801	PLK1	dominant	0.124306	0.154273	1.21598	0.778182	protective	NA
KEGG_NEUROTROPHIN_SIGNALING_PATHWAY	REACTOME_ORGANELLE_BIOGENESIS_AND_MAINTENANCE	rs7805383	7	140908104	BRAF	rs2212010	21	25811151	GABPA	recessive_dominant	0.128746	0.163152	1.21596	0.757953	protective	NA
KEGG_NEUROTROPHIN_SIGNALING_PATHWAY	REACTOME_ORGANELLE_BIOGENESIS_AND_MAINTENANCE	rs11063604	12	5408423	NTF3	rs35407590	7	33271040	BBS9	recessive_dominant	0.0299667	0.0488346	1.21574	0.601701	protective	NA
KEGG_NEUROTROPHIN_SIGNALING_PATHWAY	REACTOME_ORGANELLE_BIOGENESIS_AND_MAINTENANCE	rs12986190	19	40273038	AKT2	rs113291905	19	14136613	PRKACA	recessive_dominant	0.00221976	0.0099889	1.21481	0.220492	protective	5.459e-04
KEGG_NEUROTROPHIN_SIGNALING_PATHWAY	REACTOME_ORGANELLE_BIOGENESIS_AND_MAINTENANCE	rs557328	19	7902965	MAP2K7	rs11432188	9	34575985	DCTN3	dominant	0.152053	0.190899	1.21443	0.760022	protective	NA
KEGG_NEUROTROPHIN_SIGNALING_PATHWAY	REACTOME_ORGANELLE_BIOGENESIS_AND_MAINTENANCE	rs111530414	5	56815966	MAP3K1	rs28716841	5	132733467	KIF3A	dominant	0.00443951	0.0166482	1.21437	0.263397	protective	0.001
KEGG_NEUROTROPHIN_SIGNALING_PATHWAY	REACTOME_ORGANELLE_BIOGENESIS_AND_MAINTENANCE	rs55702801	14	73255495	PSEN1	rs28588283	4	55820993	EXOC1	dominant	0.133185	0.168701	1.21433	0.757126	protective	NA
KEGG_NEUROTROPHIN_SIGNALING_PATHWAY	REACTOME_ORGANELLE_BIOGENESIS_AND_MAINTENANCE	rs2517	9	130855035	ABL1	rs2018797	7	129210004	SMO	recessive_dominant	0.0699223	0.0943396	1.21417	0.721718	protective	NA
KEGG_NEUROTROPHIN_SIGNALING_PATHWAY	REACTOME_ORGANELLE_BIOGENESIS_AND_MAINTENANCE	rs11102837	1	115346655	NGF	rs62151837	2	73390396	ALMS1	recessive	0.0255272	0.0432852	1.2136	0.578997	protective	NA
KEGG_NEUROTROPHIN_SIGNALING_PATHWAY	REACTOME_ORGANELLE_BIOGENESIS_AND_MAINTENANCE	rs9759629	4	113743604	CAMK2D	rs201714196	11	95748746	CEP57	recessive	0.00554939	0.0166482	1.21285	0.329613	protective	NA
KEGG_NEUROTROPHIN_SIGNALING_PATHWAY	REACTOME_ORGANELLE_BIOGENESIS_AND_MAINTENANCE	rs2517	9	130855035	ABL1	rs4936388	11	117440404	CEP164	recessive_dominant	0.0110988	0.0233074	1.21271	0.470312	protective	NA
KEGG_NEUROTROPHIN_SIGNALING_PATHWAY	REACTOME_ORGANELLE_BIOGENESIS_AND_MAINTENANCE	rs13322072	3	179282730	PIK3CA	rs112830612	9	19007971	HAUS6	recessive_dominant	0.00332963	0.0099889	1.21269	0.331106	protective	NA
KEGG_NEUROTROPHIN_SIGNALING_PATHWAY	REACTOME_ORGANELLE_BIOGENESIS_AND_MAINTENANCE	rs2239798	6	36177857	MAPK13	rs12302358	12	110239437	IFT81	recessive	0	0.00665927	1.21222	0	protective	NA
KEGG_NEUROTROPHIN_SIGNALING_PATHWAY	REACTOME_ORGANELLE_BIOGENESIS_AND_MAINTENANCE	rs1007802	1	206735691	MAPKAPK2	rs10460000	18	12320551	TUBB6	recessive_dominant	0.0876804	0.113208	1.21208	0.752839	protective	NA
KEGG_NEUROTROPHIN_SIGNALING_PATHWAY	REACTOME_ORGANELLE_BIOGENESIS_AND_MAINTENANCE	rs1245510	10	73799959	CAMK2G	rs1396893	8	55779322	TGS1	recessive_dominant	0.102109	0.125416	1.21196	0.793025	protective	NA
KEGG_NEUROTROPHIN_SIGNALING_PATHWAY	REACTOME_ORGANELLE_BIOGENESIS_AND_MAINTENANCE	rs4877972	9	88989455	SHC3	rs7833836	8	17935642	PCM1	dominant	0.448391	0.490566	1.21171	0.844142	protective	NA
KEGG_NEUROTROPHIN_SIGNALING_PATHWAY	REACTOME_ORGANELLE_BIOGENESIS_AND_MAINTENANCE	rs4877972	9	88989455	SHC3	rs6751305	2	61876220	CCT4	dominant	0.45505	0.497225	1.21169	0.84435	protective	NA
KEGG_NEUROTROPHIN_SIGNALING_PATHWAY	REACTOME_ORGANELLE_BIOGENESIS_AND_MAINTENANCE	rs36133170	6	166600960	RPS6KA2	rs12679073	8	130222310	ASAP1	recessive_dominant	0.00887902	0.0210877	1.2116	0.415866	protective	NA
KEGG_NEUROTROPHIN_SIGNALING_PATHWAY	REACTOME_ORGANELLE_BIOGENESIS_AND_MAINTENANCE	rs4144887	6	166747512	RPS6KA2	rs533119830	22	40656205	MCHR1	recessive_dominant	0.045505	0.0677026	1.21146	0.6565	protective	NA
KEGG_NEUROTROPHIN_SIGNALING_PATHWAY	REACTOME_ORGANELLE_BIOGENESIS_AND_MAINTENANCE	rs2537850	14	90970875	RPS6KA5	rs71626264	3	177098521	TBL1XR1	dominant	0.298557	0.342952	1.21128	0.815452	protective	NA
KEGG_NEUROTROPHIN_SIGNALING_PATHWAY	REACTOME_ORGANELLE_BIOGENESIS_AND_MAINTENANCE	rs62044000	16	81927776	PLCG2	rs2847251	18	12751036	CEP76	dominant	0.0277469	0.045505	1.21045	0.598619	protective	NA
KEGG_NEUROTROPHIN_SIGNALING_PATHWAY	REACTOME_ORGANELLE_BIOGENESIS_AND_MAINTENANCE	rs200089036	19	38902723	NFKBIB	rs1687996	19	35587635	HAUS5	recessive	0.0399556	0.0610433	1.21031	0.640168	protective	5.470e-04
KEGG_NEUROTROPHIN_SIGNALING_PATHWAY	REACTOME_ORGANELLE_BIOGENESIS_AND_MAINTENANCE	rs9347129	6	166895934	RPS6KA2	rs9385719	6	135524516	AHI1	recessive	0.00443951	0.0166482	1.21027	0.263397	protective	8.723e-04
KEGG_NEUROTROPHIN_SIGNALING_PATHWAY	REACTOME_ORGANELLE_BIOGENESIS_AND_MAINTENANCE	rs71166958	19	4089029	MAP2K2	rs9294982	6	169696898	TCTE3	recessive_dominant	0.0554939	0.0788013	1.20969	0.686847	protective	NA
KEGG_NEUROTROPHIN_SIGNALING_PATHWAY	REACTOME_ORGANELLE_BIOGENESIS_AND_MAINTENANCE	rs28574697	19	48959488	BAX	rs57156634	11	103446048	DYNC2H1	dominant	0.0332963	0.0521643	1.20951	0.62584	protective	NA
KEGG_NEUROTROPHIN_SIGNALING_PATHWAY	REACTOME_ORGANELLE_BIOGENESIS_AND_MAINTENANCE	rs8073151	17	1495834	CRK	rs11707509	3	196346629	TCTEX1D2	recessive_dominant	0.0987791	0.128746	1.20946	0.74173	protective	NA
KEGG_NEUROTROPHIN_SIGNALING_PATHWAY	REACTOME_ORGANELLE_BIOGENESIS_AND_MAINTENANCE	rs2169633	15	66467291	MAP2K1	rs73886521	22	46273829	PPARA	dominant	0.112098	0.140954	1.20945	0.769429	protective	NA
KEGG_NEUROTROPHIN_SIGNALING_PATHWAY	REACTOME_ORGANELLE_BIOGENESIS_AND_MAINTENANCE	rs62044000	16	81927776	PLCG2	rs4287754	2	61906147	CCT4	recessive_dominant	0.00110988	0.00776915	1.20917	0.141905	protective	NA
KEGG_NEUROTROPHIN_SIGNALING_PATHWAY	REACTOME_ORGANELLE_BIOGENESIS_AND_MAINTENANCE	rs62044000	16	81927776	PLCG2	rs7562959	2	121577641	CLASP1	recessive_dominant	0.00110988	0.00776915	1.20917	0.141905	protective	NA
KEGG_NEUROTROPHIN_SIGNALING_PATHWAY	REACTOME_ORGANELLE_BIOGENESIS_AND_MAINTENANCE	rs6916254	6	136738115	MAP3K5	rs1917460	11	103527656	DYNC2H1	recessive_dominant	0.00443951	0.0144284	1.20902	0.304605	protective	NA
KEGG_NEUROTROPHIN_SIGNALING_PATHWAY	REACTOME_ORGANELLE_BIOGENESIS_AND_MAINTENANCE	rs56002030	19	49073984	NTF4	rs1396893	8	55779322	TGS1	dominant	0.418424	0.460599	1.20901	0.842555	protective	NA
KEGG_NEUROTROPHIN_SIGNALING_PATHWAY	REACTOME_ORGANELLE_BIOGENESIS_AND_MAINTENANCE	rs2803965	14	73098014	PSEN1	rs746884	20	59067268	TUBB1	recessive	0.00776915	0.0199778	1.20892	0.384104	protective	NA
KEGG_NEUROTROPHIN_SIGNALING_PATHWAY	REACTOME_ORGANELLE_BIOGENESIS_AND_MAINTENANCE	rs4791329	17	7693455	TP53	rs376270	16	57950057	CNGB1	recessive_dominant	0.0843507	0.112098	1.20869	0.729673	protective	NA
KEGG_NEUROTROPHIN_SIGNALING_PATHWAY	REACTOME_ORGANELLE_BIOGENESIS_AND_MAINTENANCE	rs76273626	18	63123969	BCL2	rs7966731	12	96871649	NEDD1	recessive	0.00221976	0.0099889	1.20848	0.220492	protective	NA
KEGG_NEUROTROPHIN_SIGNALING_PATHWAY	REACTOME_ORGANELLE_BIOGENESIS_AND_MAINTENANCE	rs55967668	5	68241438	PIK3R1	rs2655172	8	70154581	NCOA2	dominant	0.175361	0.210877	1.20846	0.795764	protective	NA
KEGG_NEUROTROPHIN_SIGNALING_PATHWAY	REACTOME_ORGANELLE_BIOGENESIS_AND_MAINTENANCE	rs1007802	1	206735691	MAPKAPK2	rs17166570	5	132660439	KIF3A	dominant	0.0554939	0.0843507	1.20817	0.637795	protective	NA
KEGG_NEUROTROPHIN_SIGNALING_PATHWAY	REACTOME_ORGANELLE_BIOGENESIS_AND_MAINTENANCE	rs1007802	1	206735691	MAPKAPK2	rs10402773	19	33004535	CEP89	dominant	0.498335	0.54495	1.20815	0.829488	protective	NA
KEGG_NEUROTROPHIN_SIGNALING_PATHWAY	REACTOME_ORGANELLE_BIOGENESIS_AND_MAINTENANCE	rs3844536	19	396948	SHC2	rs7438356	4	15624770	CC2D2A	dominant	0.36626	0.406215	1.20807	0.844793	protective	NA
KEGG_NEUROTROPHIN_SIGNALING_PATHWAY	REACTOME_ORGANELLE_BIOGENESIS_AND_MAINTENANCE	rs10413331	19	58203728	ZNF274	rs4870337	6	155312789	TFB1M	recessive_dominant	0.0210877	0.036626	1.20785	0.566619	protective	NA
KEGG_NEUROTROPHIN_SIGNALING_PATHWAY	REACTOME_ORGANELLE_BIOGENESIS_AND_MAINTENANCE	rs35104663	4	113417843	CAMK2D	rs57574050	17	76091089	EXOC7	recessive_dominant	0.00887902	0.0155383	1.20778	0.567589	protective	NA
KEGG_NEUROTROPHIN_SIGNALING_PATHWAY	REACTOME_ORGANELLE_BIOGENESIS_AND_MAINTENANCE	rs2612043	12	66183500	IRAK3	rs13061728	3	97786914	ARL6	recessive	0	0.00554939	1.20654	0	protective	NA
KEGG_NEUROTROPHIN_SIGNALING_PATHWAY	REACTOME_ORGANELLE_BIOGENESIS_AND_MAINTENANCE	rs36133170	6	166600960	RPS6KA2	rs13288249	9	78211618	CEP78	recessive_dominant	0	0.00554939	1.20654	0	protective	NA
KEGG_NEUROTROPHIN_SIGNALING_PATHWAY	REACTOME_ORGANELLE_BIOGENESIS_AND_MAINTENANCE	rs12070845	1	109261850	SORT1	rs4273371	3	108119071	IFT57	recessive_dominant	0	0.00554939	1.20654	0	protective	NA
KEGG_NEUROTROPHIN_SIGNALING_PATHWAY	REACTOME_ORGANELLE_BIOGENESIS_AND_MAINTENANCE	rs12070845	1	109261850	SORT1	rs56071638	16	53234175	CHD9	recessive_dominant	0	0.00554939	1.20654	0	protective	NA
KEGG_NEUROTROPHIN_SIGNALING_PATHWAY	REACTOME_ORGANELLE_BIOGENESIS_AND_MAINTENANCE	rs12070845	1	109261850	SORT1	rs7476037	10	5376275	TUBAL3	recessive_dominant	0	0.00554939	1.20654	0	protective	NA
KEGG_NEUROTROPHIN_SIGNALING_PATHWAY	REACTOME_ORGANELLE_BIOGENESIS_AND_MAINTENANCE	rs7076160	10	48473929	MAPK8	rs200502024	3	121820354	IQCB1	dominant	0.099889	0.129856	1.20635	0.743621	protective	NA
KEGG_NEUROTROPHIN_SIGNALING_PATHWAY	REACTOME_ORGANELLE_BIOGENESIS_AND_MAINTENANCE	rs3861824	1	58807217	JUN	rs1556034	1	6689319	DNAJC11	dominant	0.0887902	0.116537	1.20575	0.738704	protective	7.983e-05
KEGG_NEUROTROPHIN_SIGNALING_PATHWAY	REACTOME_ORGANELLE_BIOGENESIS_AND_MAINTENANCE	rs9759629	4	113743604	CAMK2D	rs10421830	19	45210634	MARK4	dominant	0.214206	0.250832	1.20565	0.814178	protective	NA
KEGG_NEUROTROPHIN_SIGNALING_PATHWAY	REACTOME_ORGANELLE_BIOGENESIS_AND_MAINTENANCE	rs1245510	10	73799959	CAMK2G	rs12819938	12	119702178	PRKAB1	recessive_dominant	0.160932	0.195339	1.20557	0.790081	protective	NA
KEGG_NEUROTROPHIN_SIGNALING_PATHWAY	REACTOME_ORGANELLE_BIOGENESIS_AND_MAINTENANCE	rs2859240	1	172624233	FASLG	rs277552	2	121632454	CLASP1	recessive	0.0310766	0.0510544	1.20528	0.596145	protective	NA
KEGG_NEUROTROPHIN_SIGNALING_PATHWAY	REACTOME_ORGANELLE_BIOGENESIS_AND_MAINTENANCE	rs998521	15	66407072	MAP2K1	rs4870337	6	155312789	TFB1M	dominant	0.0643729	0.0987791	1.20521	0.627721	protective	NA
KEGG_NEUROTROPHIN_SIGNALING_PATHWAY	REACTOME_ORGANELLE_BIOGENESIS_AND_MAINTENANCE	rs9947044	18	63263494	BCL2	rs71421442	14	57152633	EXOC5	recessive_dominant	0.0488346	0.0721421	1.20469	0.660336	protective	NA
KEGG_NEUROTROPHIN_SIGNALING_PATHWAY	REACTOME_ORGANELLE_BIOGENESIS_AND_MAINTENANCE	rs139443871	19	4165336	MAP2K2	rs2369963	3	132730101	NPHP3	recessive_dominant	0.103219	0.133185	1.20468	0.749103	protective	NA
KEGG_NEUROTROPHIN_SIGNALING_PATHWAY	REACTOME_ORGANELLE_BIOGENESIS_AND_MAINTENANCE	rs2087072	1	243829549	AKT3	rs10883462	10	102095122	PPRC1	recessive_dominant	0.123196	0.153163	1.20465	0.776857	protective	NA
KEGG_NEUROTROPHIN_SIGNALING_PATHWAY	REACTOME_ORGANELLE_BIOGENESIS_AND_MAINTENANCE	rs3844536	19	396948	SHC2	rs533119830	22	40656205	MCHR1	dominant	0.372919	0.412875	1.2045	0.845675	protective	NA
KEGG_NEUROTROPHIN_SIGNALING_PATHWAY	REACTOME_ORGANELLE_BIOGENESIS_AND_MAINTENANCE	rs13322072	3	179282730	PIK3CA	rs2212010	21	25811151	GABPA	dominant	0.337403	0.384018	1.20388	0.816801	protective	NA
KEGG_NEUROTROPHIN_SIGNALING_PATHWAY	REACTOME_ORGANELLE_BIOGENESIS_AND_MAINTENANCE	rs2087072	1	243829549	AKT3	rs2388229	16	53556997	RPGRIP1L	recessive_dominant	0.145394	0.176471	1.20388	0.793939	protective	NA
KEGG_NEUROTROPHIN_SIGNALING_PATHWAY	REACTOME_ORGANELLE_BIOGENESIS_AND_MAINTENANCE	rs201635960	5	180199887	MAPK9	rs4273371	3	108119071	IFT57	recessive	0.0133185	0.0266371	1.20355	0.493251	protective	NA
KEGG_NEUROTROPHIN_SIGNALING_PATHWAY	REACTOME_ORGANELLE_BIOGENESIS_AND_MAINTENANCE	rs12425324	12	111407697	SH2B3	rs9294982	6	169696898	TCTE3	recessive	0.0388457	0.0588235	1.20348	0.646651	protective	NA
KEGG_NEUROTROPHIN_SIGNALING_PATHWAY	REACTOME_ORGANELLE_BIOGENESIS_AND_MAINTENANCE	rs56002030	19	49073984	NTF4	rs4959880	6	442206	EXOC2	dominant	0.36404	0.408435	1.20313	0.829084	protective	NA
KEGG_NEUROTROPHIN_SIGNALING_PATHWAY	REACTOME_ORGANELLE_BIOGENESIS_AND_MAINTENANCE	rs1245510	10	73799959	CAMK2G	rs1917460	11	103527656	DYNC2H1	dominant	0.357381	0.398446	1.20307	0.839619	protective	NA
KEGG_NEUROTROPHIN_SIGNALING_PATHWAY	REACTOME_ORGANELLE_BIOGENESIS_AND_MAINTENANCE	rs11063604	12	5408423	NTF3	rs2555285	12	119688325	PRKAB1	recessive_dominant	0.0355161	0.0566038	1.20272	0.613732	protective	0.013
KEGG_NEUROTROPHIN_SIGNALING_PATHWAY	REACTOME_ORGANELLE_BIOGENESIS_AND_MAINTENANCE	rs2239798	6	36177857	MAPK13	rs10421830	19	45210634	MARK4	recessive_dominant	0.0110988	0.0244173	1.20224	0.448424	protective	NA
KEGG_NEUROTROPHIN_SIGNALING_PATHWAY	REACTOME_ORGANELLE_BIOGENESIS_AND_MAINTENANCE	rs201635960	5	180199887	MAPK9	rs6855480	4	23747576	PPARGC1A	dominant	0.134295	0.165372	1.20219	0.782929	protective	NA
KEGG_NEUROTROPHIN_SIGNALING_PATHWAY	REACTOME_ORGANELLE_BIOGENESIS_AND_MAINTENANCE	rs557328	19	7902965	MAP2K7	rs1611011	13	20695628	IFT88	recessive	0.00443951	0.0155383	1.2011	0.282529	protective	NA
KEGG_NEUROTROPHIN_SIGNALING_PATHWAY	REACTOME_ORGANELLE_BIOGENESIS_AND_MAINTENANCE	rs7805383	7	140908104	BRAF	rs10421830	19	45210634	MARK4	recessive_dominant	0.0710322	0.099889	1.20089	0.689022	protective	NA
KEGG_NEUROTROPHIN_SIGNALING_PATHWAY	REACTOME_ORGANELLE_BIOGENESIS_AND_MAINTENANCE	rs201635960	5	180199887	MAPK9	rs11668155	19	52247306	PPP2R1A	dominant	0.246393	0.283019	1.20085	0.828277	protective	NA
KEGG_NEUROTROPHIN_SIGNALING_PATHWAY	REACTOME_ORGANELLE_BIOGENESIS_AND_MAINTENANCE	rs3844536	19	396948	SHC2	rs4679312	3	126676788	CHCHD6	recessive_dominant	0.128746	0.159822	1.20044	0.776822	protective	NA
KEGG_NEUROTROPHIN_SIGNALING_PATHWAY	REACTOME_ORGANELLE_BIOGENESIS_AND_MAINTENANCE	rs10772805	12	14912466	ARHGDIB	rs16996724	22	36772774	IFT27	dominant	0.0799112	0.113208	1.19953	0.680338	protective	NA
KEGG_NEUROTROPHIN_SIGNALING_PATHWAY	REACTOME_ORGANELLE_BIOGENESIS_AND_MAINTENANCE	rs55967668	5	68241438	PIK3R1	rs7798741	7	33585000	BBS9	dominant	0.200888	0.235294	1.19939	0.817014	protective	NA
KEGG_NEUROTROPHIN_SIGNALING_PATHWAY	REACTOME_ORGANELLE_BIOGENESIS_AND_MAINTENANCE	rs531967415	1	114764150	NRAS	rs142436966	2	74351590	DCTN1	recessive_dominant	0.082131	0.110988	1.19936	0.716735	protective	NA
KEGG_NEUROTROPHIN_SIGNALING_PATHWAY	REACTOME_ORGANELLE_BIOGENESIS_AND_MAINTENANCE	rs4820983	22	31929654	YWHAH	rs10077397	5	88903298	MEF2C	recessive_dominant	0.0921199	0.118757	1.19888	0.752942	protective	NA
KEGG_NEUROTROPHIN_SIGNALING_PATHWAY	REACTOME_ORGANELLE_BIOGENESIS_AND_MAINTENANCE	rs6094276	20	44949946	YWHAB	rs6534321	4	122692023	BBS12	dominant	0.154273	0.188679	1.19828	0.784383	protective	NA
KEGG_NEUROTROPHIN_SIGNALING_PATHWAY	REACTOME_ORGANELLE_BIOGENESIS_AND_MAINTENANCE	rs4877972	9	88989455	SHC3	rs1917460	11	103527656	DYNC2H1	recessive_dominant	0.0677026	0.0943396	1.1973	0.697143	protective	NA
KEGG_NEUROTROPHIN_SIGNALING_PATHWAY	REACTOME_ORGANELLE_BIOGENESIS_AND_MAINTENANCE	rs55702801	14	73255495	PSEN1	rs142436966	2	74351590	DCTN1	dominant	0.140954	0.176471	1.19722	0.765719	protective	NA
KEGG_NEUROTROPHIN_SIGNALING_PATHWAY	REACTOME_ORGANELLE_BIOGENESIS_AND_MAINTENANCE	rs6916254	6	136738115	MAP3K5	rs553512184	1	153989995	CRTC2	recessive_dominant	0.00887902	0.0210877	1.19715	0.415866	protective	NA
KEGG_NEUROTROPHIN_SIGNALING_PATHWAY	REACTOME_ORGANELLE_BIOGENESIS_AND_MAINTENANCE	rs2612043	12	66183500	IRAK3	rs2018797	7	129210004	SMO	recessive_dominant	0.0144284	0.0288568	1.19565	0.49268	protective	NA
KEGG_NEUROTROPHIN_SIGNALING_PATHWAY	REACTOME_ORGANELLE_BIOGENESIS_AND_MAINTENANCE	rs147511193	3	119945039	GSK3B	rs2489138	1	156526564	MEF2D	recessive_dominant	0.0188679	0.0344062	1.19488	0.539702	protective	NA
KEGG_NEUROTROPHIN_SIGNALING_PATHWAY	REACTOME_ORGANELLE_BIOGENESIS_AND_MAINTENANCE	rs71166958	19	4089029	MAP2K2	rs1365962	2	218857832	PRKAG3	recessive_dominant	0.0577137	0.082131	1.19479	0.684494	protective	NA
KEGG_NEUROTROPHIN_SIGNALING_PATHWAY	REACTOME_ORGANELLE_BIOGENESIS_AND_MAINTENANCE	rs3844536	19	396948	SHC2	rs4726122	7	151675463	PRKAG2	dominant	0.386238	0.426193	1.19473	0.847254	protective	NA
KEGG_NEUROTROPHIN_SIGNALING_PATHWAY	REACTOME_ORGANELLE_BIOGENESIS_AND_MAINTENANCE	rs201635960	5	180199887	MAPK9	rs201143490	9	136452021	INPP5E	dominant	0.305216	0.345172	1.19472	0.833393	protective	NA
KEGG_NEUROTROPHIN_SIGNALING_PATHWAY	REACTOME_ORGANELLE_BIOGENESIS_AND_MAINTENANCE	rs139443871	19	4165336	MAP2K2	rs1821526	12	94388174	CEP83	recessive_dominant	0.0688124	0.0954495	1.19414	0.700308	protective	NA
KEGG_NEUROTROPHIN_SIGNALING_PATHWAY	REACTOME_ORGANELLE_BIOGENESIS_AND_MAINTENANCE	rs1245510	10	73799959	CAMK2G	rs2065994	1	243265536	SDCCAG8	dominant	0.445061	0.491676	1.19308	0.829156	protective	NA
KEGG_NEUROTROPHIN_SIGNALING_PATHWAY	REACTOME_ORGANELLE_BIOGENESIS_AND_MAINTENANCE	rs10413331	19	58203728	ZNF274	rs80256150	3	196318488	TCTEX1D2	recessive	0.00443951	0.0144284	1.19264	0.304605	protective	NA
KEGG_NEUROTROPHIN_SIGNALING_PATHWAY	REACTOME_ORGANELLE_BIOGENESIS_AND_MAINTENANCE	rs1018102	1	22041073	CDC42	rs37815	16	3455912	CLUAP1	recessive_dominant	0.0188679	0.0332963	1.19209	0.558333	protective	NA
KEGG_NEUROTROPHIN_SIGNALING_PATHWAY	REACTOME_ORGANELLE_BIOGENESIS_AND_MAINTENANCE	rs8078982	17	49485912	NGFR	rs11668155	19	52247306	PPP2R1A	recessive_dominant	0.0610433	0.0843507	1.19205	0.70572	protective	NA
KEGG_NEUROTROPHIN_SIGNALING_PATHWAY	REACTOME_ORGANELLE_BIOGENESIS_AND_MAINTENANCE	rs4791329	17	7693455	TP53	rs277552	2	121632454	CLASP1	recessive	0.0122087	0.0277469	1.19128	0.433079	protective	NA
KEGG_NEUROTROPHIN_SIGNALING_PATHWAY	REACTOME_ORGANELLE_BIOGENESIS_AND_MAINTENANCE	rs139443871	19	4165336	MAP2K2	rs11432188	9	34575985	DCTN3	recessive_dominant	0.0377358	0.0599334	1.19089	0.615105	protective	NA
KEGG_NEUROTROPHIN_SIGNALING_PATHWAY	REACTOME_ORGANELLE_BIOGENESIS_AND_MAINTENANCE	rs34137352	1	3694480	TP73	rs277552	2	121632454	CLASP1	recessive_dominant	0.0155383	0.0299667	1.19082	0.510919	protective	NA
KEGG_NEUROTROPHIN_SIGNALING_PATHWAY	REACTOME_ORGANELLE_BIOGENESIS_AND_MAINTENANCE	rs55702801	14	73255495	PSEN1	rs71421442	14	57152633	EXOC5	dominant	0.126526	0.160932	1.1904	0.755238	protective	8.826e-04
KEGG_NEUROTROPHIN_SIGNALING_PATHWAY	REACTOME_ORGANELLE_BIOGENESIS_AND_MAINTENANCE	rs7076160	10	48473929	MAPK8	rs11432188	9	34575985	DCTN3	dominant	0.102109	0.132075	1.19026	0.747307	protective	NA
KEGG_NEUROTROPHIN_SIGNALING_PATHWAY	REACTOME_ORGANELLE_BIOGENESIS_AND_MAINTENANCE	rs998521	15	66407072	MAP2K1	rs73916491	20	59046695	TUBB1	recessive_dominant	0.00221976	1	1.19011	0	protective	NA
KEGG_NEUROTROPHIN_SIGNALING_PATHWAY	REACTOME_ORGANELLE_BIOGENESIS_AND_MAINTENANCE	rs6916254	6	136738115	MAP3K5	rs17237706	11	6215571	CNGA4	recessive_dominant	0.00110988	0.00887902	1.18995	0.124028	protective	NA
KEGG_NEUROTROPHIN_SIGNALING_PATHWAY	REACTOME_ORGANELLE_BIOGENESIS_AND_MAINTENANCE	rs2612043	12	66183500	IRAK3	rs10077397	5	88903298	MEF2C	dominant	0.105438	0.134295	1.18983	0.759797	protective	NA
KEGG_NEUROTROPHIN_SIGNALING_PATHWAY	REACTOME_ORGANELLE_BIOGENESIS_AND_MAINTENANCE	rs1902716	10	48395086	MAPK8	rs11896513	2	219219183	TUBA4A/TUBA4B	recessive_dominant	0.00221976	0.0099889	1.1896	0.220492	protective	NA
KEGG_NEUROTROPHIN_SIGNALING_PATHWAY	REACTOME_ORGANELLE_BIOGENESIS_AND_MAINTENANCE	rs6072793	20	41185524	PLCG1	rs57574050	17	76091089	EXOC7	recessive_dominant	0.00554939	0.0155383	1.18923	0.353555	protective	NA
KEGG_NEUROTROPHIN_SIGNALING_PATHWAY	REACTOME_ORGANELLE_BIOGENESIS_AND_MAINTENANCE	rs2908290	7	44216137	CAMK2B	rs6961764	7	133131298	CHCHD3	recessive_dominant	0.140954	0.175361	1.18915	0.771604	protective	8.548e-06
KEGG_NEUROTROPHIN_SIGNALING_PATHWAY	REACTOME_ORGANELLE_BIOGENESIS_AND_MAINTENANCE	rs36133170	6	166600960	RPS6KA2	rs4936388	11	117440404	CEP164	recessive_dominant	0	0.00554939	1.18913	0	protective	NA
KEGG_NEUROTROPHIN_SIGNALING_PATHWAY	REACTOME_ORGANELLE_BIOGENESIS_AND_MAINTENANCE	rs2517	9	130855035	ABL1	rs11429505	8	70278596	NCOA2	dominant	0.244173	0.284129	1.1891	0.813945	protective	NA
KEGG_NEUROTROPHIN_SIGNALING_PATHWAY	REACTOME_ORGANELLE_BIOGENESIS_AND_MAINTENANCE	rs2239798	6	36177857	MAPK13	rs10883462	10	102095122	PPRC1	dominant	0.227525	0.26859	1.18899	0.802074	protective	NA
KEGG_NEUROTROPHIN_SIGNALING_PATHWAY	REACTOME_ORGANELLE_BIOGENESIS_AND_MAINTENANCE	rs66508783	19	18115826	PIK3R2	rs533119830	22	40656205	MCHR1	recessive	0.00221976	0.0122087	1.18896	0.179998	protective	NA
KEGG_NEUROTROPHIN_SIGNALING_PATHWAY	REACTOME_ORGANELLE_BIOGENESIS_AND_MAINTENANCE	rs13322072	3	179282730	PIK3CA	rs34144731	4	55921913	CEP135/EXOC1	recessive_dominant	0.00887902	0.0244173	1.18839	0.357935	protective	NA
KEGG_NEUROTROPHIN_SIGNALING_PATHWAY	REACTOME_ORGANELLE_BIOGENESIS_AND_MAINTENANCE	rs71166958	19	4089029	MAP2K2	rs2280545	11	204147	SIRT3	recessive_dominant	0.00776915	0.0199778	1.18838	0.384104	protective	NA
KEGG_NEUROTROPHIN_SIGNALING_PATHWAY	REACTOME_ORGANELLE_BIOGENESIS_AND_MAINTENANCE	rs7497619	15	49007401	SHC4	rs11287280	3	45836823	LZTFL1	dominant	0.0743618	0.100999	1.18802	0.715076	protective	NA
KEGG_NEUROTROPHIN_SIGNALING_PATHWAY	REACTOME_ORGANELLE_BIOGENESIS_AND_MAINTENANCE	rs2517	9	130855035	ABL1	rs17166570	5	132660439	KIF3A	dominant	0.0277469	0.0510544	1.18801	0.53045	protective	NA
KEGG_NEUROTROPHIN_SIGNALING_PATHWAY	REACTOME_ORGANELLE_BIOGENESIS_AND_MAINTENANCE	rs2803965	14	73098014	PSEN1	rs896806	2	19961843	WDR35	dominant	0.325194	0.36626	1.18741	0.833847	protective	NA
KEGG_NEUROTROPHIN_SIGNALING_PATHWAY	REACTOME_ORGANELLE_BIOGENESIS_AND_MAINTENANCE	rs2075076	7	44274642	CAMK2B	rs6961764	7	133131298	CHCHD3	recessive_dominant	0.0654828	0.0865705	1.18729	0.739342	protective	0.005
KEGG_NEUROTROPHIN_SIGNALING_PATHWAY	REACTOME_ORGANELLE_BIOGENESIS_AND_MAINTENANCE	rs2227485	12	68647713	RAP1B	rs12761305	10	92814031	EXOC6	recessive_dominant	0.126526	0.158713	1.1872	0.767827	protective	NA
KEGG_NEUROTROPHIN_SIGNALING_PATHWAY	REACTOME_ORGANELLE_BIOGENESIS_AND_MAINTENANCE	rs147511193	3	119945039	GSK3B	rs139876794	2	231758505	PDE6D	dominant	0.00776915	0.0188679	1.18715	0.407159	protective	NA
KEGG_NEUROTROPHIN_SIGNALING_PATHWAY	REACTOME_ORGANELLE_BIOGENESIS_AND_MAINTENANCE	rs71166958	19	4089029	MAP2K2	rs200502024	3	121820354	IQCB1	recessive_dominant	0.0099889	0.0221976	1.18697	0.444451	protective	NA
KEGG_NEUROTROPHIN_SIGNALING_PATHWAY	REACTOME_ORGANELLE_BIOGENESIS_AND_MAINTENANCE	rs4144887	6	166747512	RPS6KA2	rs113582339	7	151529654	PRKAG2	recessive_dominant	0.0133185	0.0266371	1.18687	0.493251	protective	NA
KEGG_NEUROTROPHIN_SIGNALING_PATHWAY	REACTOME_ORGANELLE_BIOGENESIS_AND_MAINTENANCE	rs13322072	3	179282730	PIK3CA	rs2130923	4	23781504	PPARGC1A	dominant	0.210877	0.253052	1.18545	0.788795	protective	NA
KEGG_NEUROTROPHIN_SIGNALING_PATHWAY	REACTOME_ORGANELLE_BIOGENESIS_AND_MAINTENANCE	rs2612043	12	66183500	IRAK3	rs1917460	11	103527656	DYNC2H1	dominant	0.153163	0.187569	1.18543	0.783392	protective	NA
KEGG_NEUROTROPHIN_SIGNALING_PATHWAY	REACTOME_ORGANELLE_BIOGENESIS_AND_MAINTENANCE	rs759228	22	20998186	CRKL	rs10883462	10	102095122	PPRC1	recessive_dominant	0.0221976	0.0399556	1.18507	0.545466	protective	NA
KEGG_NEUROTROPHIN_SIGNALING_PATHWAY	REACTOME_ORGANELLE_BIOGENESIS_AND_MAINTENANCE	rs2087072	1	243829549	AKT3	rs73916491	20	59046695	TUBB1	recessive_dominant	0.0110988	0.0255272	1.18461	0.428439	protective	NA
KEGG_NEUROTROPHIN_SIGNALING_PATHWAY	REACTOME_ORGANELLE_BIOGENESIS_AND_MAINTENANCE	rs2087072	1	243829549	AKT3	rs11996811	8	55744132	TGS1	recessive	0.0110988	0.0255272	1.18461	0.428439	protective	NA
KEGG_NEUROTROPHIN_SIGNALING_PATHWAY	REACTOME_ORGANELLE_BIOGENESIS_AND_MAINTENANCE	rs1007802	1	206735691	MAPKAPK2	rs73916491	20	59046695	TUBB1	recessive_dominant	0.0155383	0.0299667	1.18454	0.510919	protective	NA
KEGG_NEUROTROPHIN_SIGNALING_PATHWAY	REACTOME_ORGANELLE_BIOGENESIS_AND_MAINTENANCE	rs531967415	1	114764150	NRAS	rs11668155	19	52247306	PPP2R1A	recessive	0.00776915	0.0188679	1.18445	0.407159	protective	NA
KEGG_NEUROTROPHIN_SIGNALING_PATHWAY	REACTOME_ORGANELLE_BIOGENESIS_AND_MAINTENANCE	rs529025836	17	63636272	MAP3K3	rs11168720	12	49146750	TUBA1A/TUBA1B	recessive_dominant	0.0776915	0.104329	1.18428	0.723174	protective	NA
KEGG_NEUROTROPHIN_SIGNALING_PATHWAY	REACTOME_ORGANELLE_BIOGENESIS_AND_MAINTENANCE	rs55894401	16	81730962	PLCG2	rs7966731	12	96871649	NEDD1	recessive_dominant	0.0588235	0.0810211	1.18414	0.708904	protective	NA
KEGG_NEUROTROPHIN_SIGNALING_PATHWAY	REACTOME_ORGANELLE_BIOGENESIS_AND_MAINTENANCE	rs4144887	6	166747512	RPS6KA2	rs3806410	1	156337134	CCT3	recessive_dominant	0.0399556	0.0599334	1.18406	0.652794	protective	NA
KEGG_NEUROTROPHIN_SIGNALING_PATHWAY	REACTOME_ORGANELLE_BIOGENESIS_AND_MAINTENANCE	rs10413331	19	58203728	ZNF274	rs12359370	10	102181217	PPRC1	recessive_dominant	0.0244173	0.0410655	1.18379	0.584448	protective	NA
KEGG_NEUROTROPHIN_SIGNALING_PATHWAY	REACTOME_ORGANELLE_BIOGENESIS_AND_MAINTENANCE	rs4820983	22	31929654	YWHAH	rs12935211	16	58015332	CNGB1	recessive_dominant	0.139845	0.170921	1.18371	0.788622	protective	NA
KEGG_NEUROTROPHIN_SIGNALING_PATHWAY	REACTOME_ORGANELLE_BIOGENESIS_AND_MAINTENANCE	rs629608	1	111738116	RAP1A	rs11287280	3	45836823	LZTFL1	recessive_dominant	0.0155383	0.0310766	1.18322	0.492108	protective	NA
KEGG_NEUROTROPHIN_SIGNALING_PATHWAY	REACTOME_ORGANELLE_BIOGENESIS_AND_MAINTENANCE	rs629608	1	111738116	RAP1A	rs6751305	2	61876220	CCT4	recessive_dominant	0.123196	0.154273	1.18307	0.770258	protective	NA
KEGG_NEUROTROPHIN_SIGNALING_PATHWAY	REACTOME_ORGANELLE_BIOGENESIS_AND_MAINTENANCE	rs3128321	1	1953252	CALML6	rs528424379	16	23661801	PLK1	dominant	0.0577137	0.0810211	1.18182	0.694709	protective	NA
KEGG_NEUROTROPHIN_SIGNALING_PATHWAY	REACTOME_ORGANELLE_BIOGENESIS_AND_MAINTENANCE	rs2075076	7	44274642	CAMK2B	rs13288249	9	78211618	CEP78	recessive_dominant	0.0388457	0.0577137	1.18142	0.659864	protective	NA
KEGG_NEUROTROPHIN_SIGNALING_PATHWAY	REACTOME_ORGANELLE_BIOGENESIS_AND_MAINTENANCE	rs62315570	4	86331750	MAPK10	rs2655172	8	70154581	NCOA2	recessive_dominant	0.106548	0.146504	1.18135	0.694749	protective	NA
KEGG_NEUROTROPHIN_SIGNALING_PATHWAY	REACTOME_ORGANELLE_BIOGENESIS_AND_MAINTENANCE	rs325923	1	111691513	RAP1A	rs11432188	9	34575985	DCTN3	recessive_dominant	0.0610433	0.0854606	1.18099	0.695711	protective	NA
KEGG_NEUROTROPHIN_SIGNALING_PATHWAY	REACTOME_ORGANELLE_BIOGENESIS_AND_MAINTENANCE	rs11102837	1	115346655	NGF	rs200502024	3	121820354	IQCB1	recessive_dominant	0.0166482	0.0332963	1.18058	0.491535	protective	NA
KEGG_NEUROTROPHIN_SIGNALING_PATHWAY	REACTOME_ORGANELLE_BIOGENESIS_AND_MAINTENANCE	rs3861824	1	58807217	JUN	rs3806410	1	156337134	CCT3	dominant	0.0665927	0.09101	1.18032	0.712566	protective	0.002
KEGG_NEUROTROPHIN_SIGNALING_PATHWAY	REACTOME_ORGANELLE_BIOGENESIS_AND_MAINTENANCE	rs4144887	6	166747512	RPS6KA2	rs11707509	3	196346629	TCTEX1D2	recessive_dominant	0.0677026	0.0932297	1.17998	0.706307	protective	NA
KEGG_NEUROTROPHIN_SIGNALING_PATHWAY	REACTOME_ORGANELLE_BIOGENESIS_AND_MAINTENANCE	rs34137352	1	3694480	TP73	rs4821542	22	37252918	SSTR3	recessive_dominant	0.00665927	0.017758	1.17975	0.37081	protective	NA
KEGG_NEUROTROPHIN_SIGNALING_PATHWAY	REACTOME_ORGANELLE_BIOGENESIS_AND_MAINTENANCE	rs1245510	10	73799959	CAMK2G	rs28588283	4	55820993	EXOC1	recessive	0.0244173	0.0421754	1.17947	0.568409	protective	NA
KEGG_NEUROTROPHIN_SIGNALING_PATHWAY	REACTOME_ORGANELLE_BIOGENESIS_AND_MAINTENANCE	rs557328	19	7902965	MAP2K7	rs1365962	2	218857832	PRKAG3	recessive	0.0166482	0.0332963	1.17883	0.491535	protective	NA
KEGG_NEUROTROPHIN_SIGNALING_PATHWAY	REACTOME_ORGANELLE_BIOGENESIS_AND_MAINTENANCE	rs370589300	22	21718890	MAPK1	rs57156634	11	103446048	DYNC2H1	dominant	0.0099889	0.0221976	1.17839	0.444451	protective	NA
KEGG_NEUROTROPHIN_SIGNALING_PATHWAY	REACTOME_ORGANELLE_BIOGENESIS_AND_MAINTENANCE	rs370589300	22	21718890	MAPK1	rs6961764	7	133131298	CHCHD3	recessive_dominant	0.0244173	0.0421754	1.17818	0.568409	protective	NA
KEGG_NEUROTROPHIN_SIGNALING_PATHWAY	REACTOME_ORGANELLE_BIOGENESIS_AND_MAINTENANCE	rs9347129	6	166895934	RPS6KA2	rs62151837	2	73390396	ALMS1	recessive_dominant	0.0133185	0.0288568	1.17807	0.45427	protective	NA
KEGG_NEUROTROPHIN_SIGNALING_PATHWAY	REACTOME_ORGANELLE_BIOGENESIS_AND_MAINTENANCE	rs9786966	1	3623414	TP73	rs1396893	8	55779322	TGS1	recessive_dominant	0.0899001	0.122087	1.17763	0.710322	protective	NA
KEGG_NEUROTROPHIN_SIGNALING_PATHWAY	REACTOME_ORGANELLE_BIOGENESIS_AND_MAINTENANCE	rs2227485	12	68647713	RAP1B	rs746884	20	59067268	TUBB1	recessive	0.0188679	0.036626	1.17712	0.505828	protective	NA
KEGG_NEUROTROPHIN_SIGNALING_PATHWAY	REACTOME_ORGANELLE_BIOGENESIS_AND_MAINTENANCE	rs3861824	1	58807217	JUN	rs376270	16	57950057	CNGB1	dominant	0.0899001	0.116537	1.17611	0.74885	protective	NA
KEGG_NEUROTROPHIN_SIGNALING_PATHWAY	REACTOME_ORGANELLE_BIOGENESIS_AND_MAINTENANCE	rs2803965	14	73098014	PSEN1	rs2234182	19	6535080	TUBB4A	dominant	0.283019	0.322974	1.17597	0.827455	protective	NA
KEGG_NEUROTROPHIN_SIGNALING_PATHWAY	REACTOME_ORGANELLE_BIOGENESIS_AND_MAINTENANCE	rs17051913	9	89061524	SHC3	rs10812525	9	27084462	IFT74	dominant	0.230855	0.266371	1.17549	0.826647	protective	6.428e-04
KEGG_NEUROTROPHIN_SIGNALING_PATHWAY	REACTOME_ORGANELLE_BIOGENESIS_AND_MAINTENANCE	rs3128321	1	1953252	CALML6	rs7129263	11	248077	SIRT3	recessive	0	0.00554939	1.17498	0	protective	NA
KEGG_NEUROTROPHIN_SIGNALING_PATHWAY	REACTOME_ORGANELLE_BIOGENESIS_AND_MAINTENANCE	rs1245510	10	73799959	CAMK2G	rs10812525	9	27084462	IFT74	dominant	0.410655	0.45172	1.17466	0.845746	protective	NA
KEGG_NEUROTROPHIN_SIGNALING_PATHWAY	REACTOME_ORGANELLE_BIOGENESIS_AND_MAINTENANCE	rs8142362	22	20979079	CRKL	rs2369963	3	132730101	NPHP3	recessive_dominant	0.0799112	0.106548	1.17448	0.728287	protective	NA
KEGG_NEUROTROPHIN_SIGNALING_PATHWAY	REACTOME_ORGANELLE_BIOGENESIS_AND_MAINTENANCE	rs56002030	19	49073984	NTF4	rs1365962	2	218857832	PRKAG3	recessive_dominant	0.115427	0.146504	1.17426	0.760199	protective	NA
KEGG_NEUROTROPHIN_SIGNALING_PATHWAY	REACTOME_ORGANELLE_BIOGENESIS_AND_MAINTENANCE	rs13322072	3	179282730	PIK3CA	rs11429505	8	70278596	NCOA2	dominant	0.435072	0.482797	1.17403	0.825021	protective	NA
KEGG_NEUROTROPHIN_SIGNALING_PATHWAY	REACTOME_ORGANELLE_BIOGENESIS_AND_MAINTENANCE	rs4307417	9	89218258	SHC3	rs10421830	19	45210634	MARK4	recessive_dominant	0.0788013	0.104329	1.17364	0.734389	protective	NA
KEGG_NEUROTROPHIN_SIGNALING_PATHWAY	REACTOME_ORGANELLE_BIOGENESIS_AND_MAINTENANCE	rs200089036	19	38902723	NFKBIB	rs4726122	7	151675463	PRKAG2	recessive_dominant	0.105438	0.134295	1.17334	0.759797	protective	NA
KEGG_NEUROTROPHIN_SIGNALING_PATHWAY	REACTOME_ORGANELLE_BIOGENESIS_AND_MAINTENANCE	rs10772805	12	14912466	ARHGDIB	rs7966731	12	96871649	NEDD1	recessive	0.0299667	0.0488346	1.17316	0.601701	protective	0.002
KEGG_NEUROTROPHIN_SIGNALING_PATHWAY	REACTOME_ORGANELLE_BIOGENESIS_AND_MAINTENANCE	rs2803965	14	73098014	PSEN1	rs4329481	1	20658089	KIF17	dominant	0.263041	0.302997	1.173	0.821064	protective	NA
KEGG_NEUROTROPHIN_SIGNALING_PATHWAY	REACTOME_ORGANELLE_BIOGENESIS_AND_MAINTENANCE	rs12986190	19	40273038	AKT2	rs10402773	19	33004535	CEP89	dominant	0.284129	0.327414	1.17287	0.815325	protective	5.982e-05
KEGG_NEUROTROPHIN_SIGNALING_PATHWAY	REACTOME_ORGANELLE_BIOGENESIS_AND_MAINTENANCE	rs36133170	6	166600960	RPS6KA2	rs7783031	7	151590143	PRKAG2	recessive_dominant	0.00110988	0.00776915	1.17275	0.141905	protective	NA
KEGG_NEUROTROPHIN_SIGNALING_PATHWAY	REACTOME_ORGANELLE_BIOGENESIS_AND_MAINTENANCE	rs12070845	1	109261850	SORT1	rs2234182	19	6535080	TUBB4A	recessive_dominant	0	0.00554939	1.1724	0	protective	NA
KEGG_NEUROTROPHIN_SIGNALING_PATHWAY	REACTOME_ORGANELLE_BIOGENESIS_AND_MAINTENANCE	rs45596236	3	53220569	PRKCD	rs4655200	1	20672101	KIF17	recessive_dominant	0.0399556	0.0610433	1.17228	0.640168	protective	NA
KEGG_NEUROTROPHIN_SIGNALING_PATHWAY	REACTOME_ORGANELLE_BIOGENESIS_AND_MAINTENANCE	rs11102837	1	115346655	NGF	rs12819938	12	119702178	PRKAB1	recessive	0.0310766	0.0499445	1.17168	0.610106	protective	NA
KEGG_NEUROTROPHIN_SIGNALING_PATHWAY	REACTOME_ORGANELLE_BIOGENESIS_AND_MAINTENANCE	rs3844536	19	396948	SHC2	rs11429505	8	70278596	NCOA2	dominant	0.438402	0.479467	1.17111	0.847492	protective	NA
KEGG_NEUROTROPHIN_SIGNALING_PATHWAY	REACTOME_ORGANELLE_BIOGENESIS_AND_MAINTENANCE	rs2227485	12	68647713	RAP1B	rs4936388	11	117440404	CEP164	recessive_dominant	0.0188679	0.0344062	1.17019	0.539702	protective	NA
KEGG_NEUROTROPHIN_SIGNALING_PATHWAY	REACTOME_ORGANELLE_BIOGENESIS_AND_MAINTENANCE	rs36133170	6	166600960	RPS6KA2	rs12980154	19	18770119	CRTC1	recessive_dominant	0	0.00665927	1.16992	0	protective	NA
KEGG_NEUROTROPHIN_SIGNALING_PATHWAY	REACTOME_ORGANELLE_BIOGENESIS_AND_MAINTENANCE	rs8142362	22	20979079	CRKL	rs7247709	19	52240015	PPP2R1A	recessive_dominant	0.0854606	0.105438	1.16977	0.792821	protective	NA
KEGG_NEUROTROPHIN_SIGNALING_PATHWAY	REACTOME_ORGANELLE_BIOGENESIS_AND_MAINTENANCE	rs557328	19	7902965	MAP2K7	rs7247709	19	52240015	PPP2R1A	dominant	0.321865	0.36737	1.16935	0.817342	protective	1.593e-07
KEGG_NEUROTROPHIN_SIGNALING_PATHWAY	REACTOME_ORGANELLE_BIOGENESIS_AND_MAINTENANCE	rs56002030	19	49073984	NTF4	rs37815	16	3455912	CLUAP1	dominant	0.210877	0.247503	1.16924	0.812473	protective	NA
KEGG_NEUROTROPHIN_SIGNALING_PATHWAY	REACTOME_ORGANELLE_BIOGENESIS_AND_MAINTENANCE	rs557328	19	7902965	MAP2K7	rs6464184	7	151625412	PRKAG2	recessive_dominant	0.0532741	0.0754717	1.1689	0.689332	protective	NA
KEGG_NEUROTROPHIN_SIGNALING_PATHWAY	REACTOME_ORGANELLE_BIOGENESIS_AND_MAINTENANCE	rs4877972	9	88989455	SHC3	rs17017668	1	211694508	NEK2	dominant	0.103219	0.133185	1.16859	0.749103	protective	NA
KEGG_NEUROTROPHIN_SIGNALING_PATHWAY	REACTOME_ORGANELLE_BIOGENESIS_AND_MAINTENANCE	rs4307417	9	89218258	SHC3	rs6961764	7	133131298	CHCHD3	recessive	0.0499445	0.0721421	1.16849	0.676132	protective	NA
KEGG_NEUROTROPHIN_SIGNALING_PATHWAY	REACTOME_ORGANELLE_BIOGENESIS_AND_MAINTENANCE	rs10413331	19	58203728	ZNF274	rs2671332	11	103231440	DYNC2H1	recessive_dominant	0.0665927	0.0932297	1.1682	0.693902	protective	NA
KEGG_NEUROTROPHIN_SIGNALING_PATHWAY	REACTOME_ORGANELLE_BIOGENESIS_AND_MAINTENANCE	rs557328	19	7902965	MAP2K7	rs979802	11	103388805	DYNC2H1	dominant	0.322974	0.368479	1.1673	0.817593	protective	NA
KEGG_NEUROTROPHIN_SIGNALING_PATHWAY	REACTOME_ORGANELLE_BIOGENESIS_AND_MAINTENANCE	rs998521	15	66407072	MAP2K1	rs11625774	14	91957385	TRIP11	recessive	0.00665927	0.0166482	1.16639	0.395978	protective	NA
KEGG_NEUROTROPHIN_SIGNALING_PATHWAY	REACTOME_ORGANELLE_BIOGENESIS_AND_MAINTENANCE	rs201635960	5	180199887	MAPK9	rs4959880	6	442206	EXOC2	dominant	0.286349	0.328524	1.1656	0.820111	protective	NA
KEGG_NEUROTROPHIN_SIGNALING_PATHWAY	REACTOME_ORGANELLE_BIOGENESIS_AND_MAINTENANCE	rs6094276	20	44949946	YWHAB	rs77793021	14	22943872	HAUS4	recessive_dominant	0.0155383	0.0288568	1.16531	0.531177	protective	NA
KEGG_NEUROTROPHIN_SIGNALING_PATHWAY	REACTOME_ORGANELLE_BIOGENESIS_AND_MAINTENANCE	rs12337518	9	84884971	NTRK2	rs12679073	8	130222310	ASAP1	recessive_dominant	0.0110988	0.0233074	1.16525	0.470312	protective	NA
KEGG_NEUROTROPHIN_SIGNALING_PATHWAY	REACTOME_ORGANELLE_BIOGENESIS_AND_MAINTENANCE	rs7522448	1	109279791	SORT1	rs6593798	1	147135704	PRKAB2	recessive_dominant	0.0199778	0.036626	1.16464	0.536189	protective	0.007
KEGG_NEUROTROPHIN_SIGNALING_PATHWAY	REACTOME_ORGANELLE_BIOGENESIS_AND_MAINTENANCE	rs6916254	6	136738115	MAP3K5	rs890980	5	477303	EXOC3	recessive_dominant	0.0110988	0.0199778	1.16407	0.550567	protective	NA
KEGG_NEUROTROPHIN_SIGNALING_PATHWAY	REACTOME_ORGANELLE_BIOGENESIS_AND_MAINTENANCE	rs62315570	4	86331750	MAPK10	rs73916491	20	59046695	TUBB1	recessive_dominant	0.0122087	0.0255272	1.16375	0.471812	protective	NA
KEGG_NEUROTROPHIN_SIGNALING_PATHWAY	REACTOME_ORGANELLE_BIOGENESIS_AND_MAINTENANCE	rs2537850	14	90970875	RPS6KA5	rs11432188	9	34575985	DCTN3	dominant	0.148724	0.18202	1.16366	0.785115	protective	NA
KEGG_NEUROTROPHIN_SIGNALING_PATHWAY	REACTOME_ORGANELLE_BIOGENESIS_AND_MAINTENANCE	rs2169633	15	66467291	MAP2K1	rs9678422	2	169532214	BBS5	dominant	0.0510544	0.0732519	1.16316	0.680666	protective	NA
KEGG_NEUROTROPHIN_SIGNALING_PATHWAY	REACTOME_ORGANELLE_BIOGENESIS_AND_MAINTENANCE	rs2075076	7	44274642	CAMK2B	rs10402773	19	33004535	CEP89	dominant	0.336293	0.380688	1.16313	0.824293	protective	NA
KEGG_NEUROTROPHIN_SIGNALING_PATHWAY	REACTOME_ORGANELLE_BIOGENESIS_AND_MAINTENANCE	rs200089036	19	38902723	NFKBIB	rs2388229	16	53556997	RPGRIP1L	recessive_dominant	0.126526	0.155383	1.16291	0.787384	protective	NA
KEGG_NEUROTROPHIN_SIGNALING_PATHWAY	REACTOME_ORGANELLE_BIOGENESIS_AND_MAINTENANCE	rs139443871	19	4165336	MAP2K2	rs200118470	16	15672080	NDE1	dominant	0.112098	0.142064	1.1629	0.762432	protective	NA
KEGG_NEUROTROPHIN_SIGNALING_PATHWAY	REACTOME_ORGANELLE_BIOGENESIS_AND_MAINTENANCE	rs55894401	16	81730962	PLCG2	rs7848846	9	137151050	SSNA1	recessive_dominant	0.0410655	0.0688124	1.16226	0.579506	protective	NA
KEGG_NEUROTROPHIN_SIGNALING_PATHWAY	REACTOME_ORGANELLE_BIOGENESIS_AND_MAINTENANCE	rs72765496	5	56945800	MAP3K1	rs1611011	13	20695628	IFT88	recessive_dominant	0.017758	0.0321865	1.16171	0.54362	protective	NA
KEGG_NEUROTROPHIN_SIGNALING_PATHWAY	REACTOME_ORGANELLE_BIOGENESIS_AND_MAINTENANCE	rs629608	1	111738116	RAP1A	rs9348164	6	167071948	FGFR1OP	recessive	0.017758	0.0321865	1.16171	0.54362	protective	NA
KEGG_NEUROTROPHIN_SIGNALING_PATHWAY	REACTOME_ORGANELLE_BIOGENESIS_AND_MAINTENANCE	rs62315570	4	86331750	MAPK10	rs227911	17	64541343	POLG2	recessive	0.017758	0.0321865	1.16171	0.54362	protective	NA
KEGG_NEUROTROPHIN_SIGNALING_PATHWAY	REACTOME_ORGANELLE_BIOGENESIS_AND_MAINTENANCE	rs2537850	14	90970875	RPS6KA5	rs4821542	22	37252918	SSTR3	recessive_dominant	0.0221976	0.0377358	1.16162	0.578888	protective	NA
KEGG_NEUROTROPHIN_SIGNALING_PATHWAY	REACTOME_ORGANELLE_BIOGENESIS_AND_MAINTENANCE	rs11063604	12	5408423	NTF3	rs12672218	7	134088779	EXOC4	recessive_dominant	0.0155383	0.0310766	1.16152	0.492108	protective	NA
KEGG_NEUROTROPHIN_SIGNALING_PATHWAY	REACTOME_ORGANELLE_BIOGENESIS_AND_MAINTENANCE	rs545970	6	44239677	NFKBIE	rs7438356	4	15624770	CC2D2A	recessive_dominant	0.0799112	0.105438	1.16144	0.736868	protective	NA
KEGG_NEUROTROPHIN_SIGNALING_PATHWAY	REACTOME_ORGANELLE_BIOGENESIS_AND_MAINTENANCE	rs4307417	9	89218258	SHC3	rs12935211	16	58015332	CNGB1	recessive	0.0410655	0.0599334	1.16127	0.671704	protective	NA
KEGG_NEUROTROPHIN_SIGNALING_PATHWAY	REACTOME_ORGANELLE_BIOGENESIS_AND_MAINTENANCE	rs7222654	17	8932404	PIK3R5	rs227911	17	64541343	POLG2	recessive_dominant	0.0210877	0.036626	1.16087	0.566619	protective	0.001
KEGG_NEUROTROPHIN_SIGNALING_PATHWAY	REACTOME_ORGANELLE_BIOGENESIS_AND_MAINTENANCE	rs55894401	16	81730962	PLCG2	rs34782630	7	129593069	NRF1	dominant	0.130966	0.162042	1.16024	0.779317	protective	NA
KEGG_NEUROTROPHIN_SIGNALING_PATHWAY	REACTOME_ORGANELLE_BIOGENESIS_AND_MAINTENANCE	rs529025836	17	63636272	MAP3K3	rs7626359	3	126796501	CHCHD6	recessive_dominant	0.117647	0.149834	1.16006	0.756543	protective	NA
KEGG_NEUROTROPHIN_SIGNALING_PATHWAY	REACTOME_ORGANELLE_BIOGENESIS_AND_MAINTENANCE	rs56002030	19	49073984	NTF4	rs553512184	1	153989995	CRTC2	dominant	0.528302	0.569367	1.16006	0.847096	protective	NA
KEGG_NEUROTROPHIN_SIGNALING_PATHWAY	REACTOME_ORGANELLE_BIOGENESIS_AND_MAINTENANCE	rs9347129	6	166895934	RPS6KA2	rs4959880	6	442206	EXOC2	dominant	0.140954	0.176471	1.15995	0.765719	protective	1.142e-04
KEGG_NEUROTROPHIN_SIGNALING_PATHWAY	REACTOME_ORGANELLE_BIOGENESIS_AND_MAINTENANCE	rs1245510	10	73799959	CAMK2G	rs890980	5	477303	EXOC3	recessive_dominant	0.159822	0.194229	1.15974	0.78916	protective	NA
KEGG_NEUROTROPHIN_SIGNALING_PATHWAY	REACTOME_ORGANELLE_BIOGENESIS_AND_MAINTENANCE	rs56002030	19	49073984	NTF4	rs12679073	8	130222310	ASAP1	dominant	0.398446	0.439512	1.15962	0.844678	protective	NA
KEGG_NEUROTROPHIN_SIGNALING_PATHWAY	REACTOME_ORGANELLE_BIOGENESIS_AND_MAINTENANCE	rs139443871	19	4165336	MAP2K2	rs7833836	8	17935642	PCM1	recessive_dominant	0.109878	0.139845	1.15899	0.759263	protective	NA
KEGG_NEUROTROPHIN_SIGNALING_PATHWAY	REACTOME_ORGANELLE_BIOGENESIS_AND_MAINTENANCE	rs62044000	16	81927776	PLCG2	rs7438356	4	15624770	CC2D2A	recessive_dominant	0.00665927	0.0188679	1.15828	0.348603	protective	NA
KEGG_NEUROTROPHIN_SIGNALING_PATHWAY	REACTOME_ORGANELLE_BIOGENESIS_AND_MAINTENANCE	rs10413331	19	58203728	ZNF274	rs7966731	12	96871649	NEDD1	recessive_dominant	0.0599334	0.082131	1.1573	0.712499	protective	NA
KEGG_NEUROTROPHIN_SIGNALING_PATHWAY	REACTOME_ORGANELLE_BIOGENESIS_AND_MAINTENANCE	rs12070845	1	109261850	SORT1	rs11985061	8	130359659	ASAP1	recessive_dominant	0.00110988	0.00776915	1.15673	0.141905	protective	NA
KEGG_NEUROTROPHIN_SIGNALING_PATHWAY	REACTOME_ORGANELLE_BIOGENESIS_AND_MAINTENANCE	rs55894401	16	81730962	PLCG2	rs12930989	16	80562160	DYNLRB2	recessive_dominant	0.00443951	0.0144284	1.1558	0.304605	protective	1.492e-04
KEGG_NEUROTROPHIN_SIGNALING_PATHWAY	REACTOME_ORGANELLE_BIOGENESIS_AND_MAINTENANCE	rs2087072	1	243829549	AKT3	rs17237706	11	6215571	CNGA4	recessive_dominant	0.0510544	0.0743618	1.15535	0.669704	protective	NA
KEGG_NEUROTROPHIN_SIGNALING_PATHWAY	REACTOME_ORGANELLE_BIOGENESIS_AND_MAINTENANCE	rs12986190	19	40273038	AKT2	rs7798741	7	33585000	BBS9	dominant	0.285239	0.322974	1.15456	0.836535	protective	NA
KEGG_NEUROTROPHIN_SIGNALING_PATHWAY	REACTOME_ORGANELLE_BIOGENESIS_AND_MAINTENANCE	rs9786966	1	3623414	TP73	rs890980	5	477303	EXOC3	recessive_dominant	0.140954	0.174251	1.15447	0.777564	protective	NA
KEGG_NEUROTROPHIN_SIGNALING_PATHWAY	REACTOME_ORGANELLE_BIOGENESIS_AND_MAINTENANCE	rs8073151	17	1495834	CRK	rs979802	11	103388805	DYNC2H1	recessive_dominant	0.168701	0.200888	1.15404	0.807264	protective	NA
KEGG_NEUROTROPHIN_SIGNALING_PATHWAY	REACTOME_ORGANELLE_BIOGENESIS_AND_MAINTENANCE	rs529025836	17	63636272	MAP3K3	rs4936388	11	117440404	CEP164	recessive_dominant	0.0199778	0.0355161	1.15362	0.553582	protective	NA
KEGG_NEUROTROPHIN_SIGNALING_PATHWAY	REACTOME_ORGANELLE_BIOGENESIS_AND_MAINTENANCE	rs1018102	1	22041073	CDC42	rs4821542	22	37252918	SSTR3	recessive_dominant	0.0277469	0.0443951	1.15329	0.614298	protective	NA
KEGG_NEUROTROPHIN_SIGNALING_PATHWAY	REACTOME_ORGANELLE_BIOGENESIS_AND_MAINTENANCE	rs7076160	10	48473929	MAPK8	rs2021883	7	33122453	BBS9	dominant	0.261931	0.301887	1.15311	0.820677	protective	NA
KEGG_NEUROTROPHIN_SIGNALING_PATHWAY	REACTOME_ORGANELLE_BIOGENESIS_AND_MAINTENANCE	rs2169633	15	66467291	MAP2K1	rs10779788	1	5945990	NPHP4	dominant	0.324084	0.36293	1.15241	0.841646	protective	NA
KEGG_NEUROTROPHIN_SIGNALING_PATHWAY	REACTOME_ORGANELLE_BIOGENESIS_AND_MAINTENANCE	rs557328	19	7902965	MAP2K7	rs201143490	9	136452021	INPP5E	dominant	0.257492	0.300777	1.15204	0.806182	protective	NA
KEGG_NEUROTROPHIN_SIGNALING_PATHWAY	REACTOME_ORGANELLE_BIOGENESIS_AND_MAINTENANCE	rs200089036	19	38902723	NFKBIB	rs13061728	3	97786914	ARL6	recessive_dominant	0.127636	0.157603	1.15193	0.78204	protective	NA
KEGG_NEUROTROPHIN_SIGNALING_PATHWAY	REACTOME_ORGANELLE_BIOGENESIS_AND_MAINTENANCE	rs4791329	17	7693455	TP53	rs57574050	17	76091089	EXOC7	recessive_dominant	0.0299667	0.0499445	1.15186	0.587643	protective	5.816e-04
KEGG_NEUROTROPHIN_SIGNALING_PATHWAY	REACTOME_ORGANELLE_BIOGENESIS_AND_MAINTENANCE	rs4791329	17	7693455	TP53	rs2280545	11	204147	SIRT3	recessive_dominant	0.0299667	0.0499445	1.15186	0.587643	protective	NA
KEGG_NEUROTROPHIN_SIGNALING_PATHWAY	REACTOME_ORGANELLE_BIOGENESIS_AND_MAINTENANCE	rs7033070	9	131586374	RAPGEF1	rs17166570	5	132660439	KIF3A	dominant	0.0577137	0.0865705	1.1517	0.64625	protective	NA
KEGG_NEUROTROPHIN_SIGNALING_PATHWAY	REACTOME_ORGANELLE_BIOGENESIS_AND_MAINTENANCE	rs66508783	19	18115826	PIK3R2	rs74183366	19	35674986	HAUS5	recessive_dominant	0.0466149	0.0699223	1.151	0.650369	protective	9.402e-04
KEGG_NEUROTROPHIN_SIGNALING_PATHWAY	REACTOME_ORGANELLE_BIOGENESIS_AND_MAINTENANCE	rs4877972	9	88989455	SHC3	rs1396893	8	55779322	TGS1	recessive_dominant	0.082131	0.109878	1.15083	0.724879	protective	NA
KEGG_NEUROTROPHIN_SIGNALING_PATHWAY	REACTOME_ORGANELLE_BIOGENESIS_AND_MAINTENANCE	rs201635960	5	180199887	MAPK9	rs200118470	16	15672080	NDE1	dominant	0.0887902	0.115427	1.15083	0.746744	protective	NA
KEGG_NEUROTROPHIN_SIGNALING_PATHWAY	REACTOME_ORGANELLE_BIOGENESIS_AND_MAINTENANCE	rs4144887	6	166747512	RPS6KA2	rs12761305	10	92814031	EXOC6	dominant	0.295228	0.334073	1.15069	0.835012	protective	NA
KEGG_NEUROTROPHIN_SIGNALING_PATHWAY	REACTOME_ORGANELLE_BIOGENESIS_AND_MAINTENANCE	rs139443871	19	4165336	MAP2K2	rs7870489	9	121104485	CNTRL	recessive	0.0377358	0.0599334	1.15043	0.615105	protective	NA
KEGG_NEUROTROPHIN_SIGNALING_PATHWAY	REACTOME_ORGANELLE_BIOGENESIS_AND_MAINTENANCE	rs2908290	7	44216137	CAMK2B	rs1556034	1	6689319	DNAJC11	dominant	0.376249	0.418424	1.15041	0.838404	protective	NA
KEGG_NEUROTROPHIN_SIGNALING_PATHWAY	REACTOME_ORGANELLE_BIOGENESIS_AND_MAINTENANCE	rs2537850	14	90970875	RPS6KA5	rs201143490	9	136452021	INPP5E	dominant	0.264151	0.304107	1.15014	0.821449	protective	NA
KEGG_NEUROTROPHIN_SIGNALING_PATHWAY	REACTOME_ORGANELLE_BIOGENESIS_AND_MAINTENANCE	rs3844536	19	396948	SHC2	rs7798741	7	33585000	BBS9	dominant	0.419534	0.460599	1.14996	0.846405	protective	NA
KEGG_NEUROTROPHIN_SIGNALING_PATHWAY	REACTOME_ORGANELLE_BIOGENESIS_AND_MAINTENANCE	rs62315570	4	86331750	MAPK10	rs1361784	6	84090690	CEP162	recessive_dominant	0.0499445	0.0743618	1.14981	0.65438	protective	NA
KEGG_NEUROTROPHIN_SIGNALING_PATHWAY	REACTOME_ORGANELLE_BIOGENESIS_AND_MAINTENANCE	rs6072793	20	41185524	PLCG1	rs2489138	1	156526564	MEF2D	dominant	0.3596	0.407325	1.14923	0.817042	protective	NA
KEGG_NEUROTROPHIN_SIGNALING_PATHWAY	REACTOME_ORGANELLE_BIOGENESIS_AND_MAINTENANCE	rs557328	19	7902965	MAP2K7	rs9294982	6	169696898	TCTE3	recessive_dominant	0.0765816	0.100999	1.14886	0.738192	protective	NA
KEGG_NEUROTROPHIN_SIGNALING_PATHWAY	REACTOME_ORGANELLE_BIOGENESIS_AND_MAINTENANCE	rs62315570	4	86331750	MAPK10	rs34487560	4	56029268	CEP135	dominant	0.400666	0.440622	1.14829	0.848699	protective	0.001
KEGG_NEUROTROPHIN_SIGNALING_PATHWAY	REACTOME_ORGANELLE_BIOGENESIS_AND_MAINTENANCE	rs13322072	3	179282730	PIK3CA	rs7476037	10	5376275	TUBAL3	recessive_dominant	0.0854606	0.114317	1.14769	0.723984	protective	NA
KEGG_NEUROTROPHIN_SIGNALING_PATHWAY	REACTOME_ORGANELLE_BIOGENESIS_AND_MAINTENANCE	rs2537850	14	90970875	RPS6KA5	rs10812525	9	27084462	IFT74	recessive_dominant	0.0621532	0.0854606	1.1475	0.709198	protective	NA
KEGG_NEUROTROPHIN_SIGNALING_PATHWAY	REACTOME_ORGANELLE_BIOGENESIS_AND_MAINTENANCE	rs7805383	7	140908104	BRAF	rs2388229	16	53556997	RPGRIP1L	recessive_dominant	0.157603	0.193119	1.14743	0.781685	protective	NA
KEGG_NEUROTROPHIN_SIGNALING_PATHWAY	REACTOME_ORGANELLE_BIOGENESIS_AND_MAINTENANCE	rs325923	1	111691513	RAP1A	rs1396893	8	55779322	TGS1	recessive_dominant	0.0943396	0.120977	1.14717	0.756881	protective	NA
KEGG_NEUROTROPHIN_SIGNALING_PATHWAY	REACTOME_ORGANELLE_BIOGENESIS_AND_MAINTENANCE	rs201635960	5	180199887	MAPK9	rs76940793	3	160447833	IFT80	dominant	0.0510544	0.0732519	1.14656	0.680666	protective	NA
KEGG_NEUROTROPHIN_SIGNALING_PATHWAY	REACTOME_ORGANELLE_BIOGENESIS_AND_MAINTENANCE	rs4877972	9	88989455	SHC3	rs201143490	9	136452021	INPP5E	dominant	0.339623	0.379578	1.14573	0.840602	protective	0.003
KEGG_NEUROTROPHIN_SIGNALING_PATHWAY	REACTOME_ORGANELLE_BIOGENESIS_AND_MAINTENANCE	rs8073151	17	1495834	CRK	rs2021883	7	33122453	BBS9	recessive	0.0399556	0.0610433	1.14549	0.640168	protective	NA
KEGG_NEUROTROPHIN_SIGNALING_PATHWAY	REACTOME_ORGANELLE_BIOGENESIS_AND_MAINTENANCE	rs529025836	17	63636272	MAP3K3	rs12679073	8	130222310	ASAP1	recessive_dominant	0.119867	0.152053	1.14524	0.759492	protective	NA
KEGG_NEUROTROPHIN_SIGNALING_PATHWAY	REACTOME_ORGANELLE_BIOGENESIS_AND_MAINTENANCE	rs12986190	19	40273038	AKT2	rs2234182	19	6535080	TUBB4A	dominant	0.228635	0.266371	1.1452	0.816343	protective	1.216e-04
KEGG_NEUROTROPHIN_SIGNALING_PATHWAY	REACTOME_ORGANELLE_BIOGENESIS_AND_MAINTENANCE	rs56002030	19	49073984	NTF4	rs533119830	22	40656205	MCHR1	dominant	0.45283	0.493896	1.14514	0.848043	protective	NA
KEGG_NEUROTROPHIN_SIGNALING_PATHWAY	REACTOME_ORGANELLE_BIOGENESIS_AND_MAINTENANCE	rs2075076	7	44274642	CAMK2B	rs37815	16	3455912	CLUAP1	recessive_dominant	0.0110988	0.0244173	1.14499	0.448424	protective	NA
KEGG_NEUROTROPHIN_SIGNALING_PATHWAY	REACTOME_ORGANELLE_BIOGENESIS_AND_MAINTENANCE	rs531967415	1	114764150	NRAS	rs2847251	18	12751036	CEP76	recessive_dominant	0.0355161	0.0566038	1.14497	0.613732	protective	NA
KEGG_NEUROTROPHIN_SIGNALING_PATHWAY	REACTOME_ORGANELLE_BIOGENESIS_AND_MAINTENANCE	rs9347129	6	166895934	RPS6KA2	rs6961764	7	133131298	CHCHD3	dominant	0.216426	0.250832	1.14495	0.824945	protective	NA
KEGG_NEUROTROPHIN_SIGNALING_PATHWAY	REACTOME_ORGANELLE_BIOGENESIS_AND_MAINTENANCE	rs7033070	9	131586374	RAPGEF1	rs4531944	2	166001810	TTC21B	recessive_dominant	0.0299667	0.0466149	1.14486	0.631824	protective	NA
KEGG_NEUROTROPHIN_SIGNALING_PATHWAY	REACTOME_ORGANELLE_BIOGENESIS_AND_MAINTENANCE	rs13322072	3	179282730	PIK3CA	rs4726122	7	151675463	PRKAG2	dominant	0.385128	0.431743	1.14381	0.824404	protective	NA
KEGG_NEUROTROPHIN_SIGNALING_PATHWAY	REACTOME_ORGANELLE_BIOGENESIS_AND_MAINTENANCE	rs9759629	4	113743604	CAMK2D	rs12933372	16	80566189	DYNLRB2	recessive_dominant	0.0221976	0.0399556	1.14335	0.545466	protective	NA
KEGG_NEUROTROPHIN_SIGNALING_PATHWAY	REACTOME_ORGANELLE_BIOGENESIS_AND_MAINTENANCE	rs1245510	10	73799959	CAMK2G	rs2105847	4	2271113	HAUS3	dominant	0.380688	0.425083	1.14334	0.831363	protective	NA
KEGG_NEUROTROPHIN_SIGNALING_PATHWAY	REACTOME_ORGANELLE_BIOGENESIS_AND_MAINTENANCE	rs2224949	14	50096560	SOS2	rs890980	5	477303	EXOC3	recessive_dominant	0.143174	0.176471	1.14322	0.779793	protective	NA
KEGG_NEUROTROPHIN_SIGNALING_PATHWAY	REACTOME_ORGANELLE_BIOGENESIS_AND_MAINTENANCE	rs7482257	11	27755298	BDNF	rs553512184	1	153989995	CRTC2	recessive_dominant	0.134295	0.163152	1.1432	0.795692	protective	NA
KEGG_NEUROTROPHIN_SIGNALING_PATHWAY	REACTOME_ORGANELLE_BIOGENESIS_AND_MAINTENANCE	rs4820983	22	31929654	YWHAH	rs7833836	8	17935642	PCM1	recessive_dominant	0.133185	0.163152	1.14267	0.788105	protective	NA
KEGG_NEUROTROPHIN_SIGNALING_PATHWAY	REACTOME_ORGANELLE_BIOGENESIS_AND_MAINTENANCE	rs2239798	6	36177857	MAPK13	rs37815	16	3455912	CLUAP1	recessive_dominant	0.0133185	0.0288568	1.14264	0.45427	protective	NA
KEGG_NEUROTROPHIN_SIGNALING_PATHWAY	REACTOME_ORGANELLE_BIOGENESIS_AND_MAINTENANCE	rs4144887	6	166747512	RPS6KA2	rs7247709	19	52240015	PPP2R1A	dominant	0.314095	0.357381	1.14251	0.823419	protective	NA
KEGG_NEUROTROPHIN_SIGNALING_PATHWAY	REACTOME_ORGANELLE_BIOGENESIS_AND_MAINTENANCE	rs11862662	16	81975892	PLCG2	rs2072826	6	135253558	AHI1	recessive_dominant	0.0233074	0.0399556	1.14229	0.57339	protective	NA
KEGG_NEUROTROPHIN_SIGNALING_PATHWAY	REACTOME_ORGANELLE_BIOGENESIS_AND_MAINTENANCE	rs998521	15	66407072	MAP2K1	rs4921870	8	18023154	PCM1	dominant	0.18091	0.226415	1.14145	0.75463	protective	NA
KEGG_NEUROTROPHIN_SIGNALING_PATHWAY	REACTOME_ORGANELLE_BIOGENESIS_AND_MAINTENANCE	rs8073151	17	1495834	CRK	rs10421830	19	45210634	MARK4	recessive_dominant	0.0976693	0.125416	1.1409	0.754814	protective	NA
KEGG_NEUROTROPHIN_SIGNALING_PATHWAY	REACTOME_ORGANELLE_BIOGENESIS_AND_MAINTENANCE	rs55967668	5	68241438	PIK3R1	rs2790035	9	128439923	ODF2	recessive	0.00443951	0.0133185	1.14048	0.33036	protective	NA
KEGG_NEUROTROPHIN_SIGNALING_PATHWAY	REACTOME_ORGANELLE_BIOGENESIS_AND_MAINTENANCE	rs2859240	1	172624233	FASLG	rs6593798	1	147135704	PRKAB2	recessive_dominant	0.0277469	0.0499445	1.14006	0.542872	protective	0.004
KEGG_NEUROTROPHIN_SIGNALING_PATHWAY	REACTOME_ORGANELLE_BIOGENESIS_AND_MAINTENANCE	rs3844536	19	396948	SHC2	rs4761574	12	94503883	CEP83	dominant	0.445061	0.485017	1.14001	0.851551	protective	NA
KEGG_NEUROTROPHIN_SIGNALING_PATHWAY	REACTOME_ORGANELLE_BIOGENESIS_AND_MAINTENANCE	rs36133170	6	166600960	RPS6KA2	rs2234182	19	6535080	TUBB4A	recessive_dominant	0.00110988	0.00776915	1.13999	0.141905	protective	NA
KEGG_NEUROTROPHIN_SIGNALING_PATHWAY	REACTOME_ORGANELLE_BIOGENESIS_AND_MAINTENANCE	rs6924899	6	166476996	RPS6KA2	rs2388229	16	53556997	RPGRIP1L	recessive	0.0233074	0.0421754	1.13977	0.541956	protective	NA
KEGG_NEUROTROPHIN_SIGNALING_PATHWAY	REACTOME_ORGANELLE_BIOGENESIS_AND_MAINTENANCE	rs557328	19	7902965	MAP2K7	rs7798741	7	33585000	BBS9	dominant	0.338513	0.384018	1.13944	0.820863	protective	NA
KEGG_NEUROTROPHIN_SIGNALING_PATHWAY	REACTOME_ORGANELLE_BIOGENESIS_AND_MAINTENANCE	rs2075076	7	44274642	CAMK2B	rs979802	11	103388805	DYNC2H1	dominant	0.296337	0.338513	1.13893	0.82294	protective	NA
KEGG_NEUROTROPHIN_SIGNALING_PATHWAY	REACTOME_ORGANELLE_BIOGENESIS_AND_MAINTENANCE	rs55967668	5	68241438	PIK3R1	rs13061728	3	97786914	ARL6	recessive_dominant	0.0166482	0.0299667	1.13822	0.548031	protective	NA
KEGG_NEUROTROPHIN_SIGNALING_PATHWAY	REACTOME_ORGANELLE_BIOGENESIS_AND_MAINTENANCE	rs12425324	12	111407697	SH2B3	rs11429505	8	70278596	NCOA2	recessive_dominant	0.150943	0.18091	1.13797	0.804908	protective	NA
KEGG_NEUROTROPHIN_SIGNALING_PATHWAY	REACTOME_ORGANELLE_BIOGENESIS_AND_MAINTENANCE	rs1245510	10	73799959	CAMK2G	rs428183	7	158962061	WDR60	recessive	0.0443951	0.0654828	1.13772	0.663005	protective	NA
KEGG_NEUROTROPHIN_SIGNALING_PATHWAY	REACTOME_ORGANELLE_BIOGENESIS_AND_MAINTENANCE	rs9759629	4	113743604	CAMK2D	rs2234182	19	6535080	TUBB4A	dominant	0.335183	0.376249	1.13698	0.835828	protective	NA
KEGG_NEUROTROPHIN_SIGNALING_PATHWAY	REACTOME_ORGANELLE_BIOGENESIS_AND_MAINTENANCE	rs4791329	17	7693455	TP53	rs227018	14	22993908	HAUS4	recessive_dominant	0.0710322	0.0976693	1.13673	0.706419	protective	NA
KEGG_NEUROTROPHIN_SIGNALING_PATHWAY	REACTOME_ORGANELLE_BIOGENESIS_AND_MAINTENANCE	rs139443871	19	4165336	MAP2K2	rs11996811	8	55744132	TGS1	recessive_dominant	0.0799112	0.108768	1.13664	0.711652	protective	NA
KEGG_NEUROTROPHIN_SIGNALING_PATHWAY	REACTOME_ORGANELLE_BIOGENESIS_AND_MAINTENANCE	rs2803965	14	73098014	PSEN1	rs71626264	3	177098521	TBL1XR1	dominant	0.312986	0.352941	1.13584	0.835218	protective	NA
KEGG_NEUROTROPHIN_SIGNALING_PATHWAY	REACTOME_ORGANELLE_BIOGENESIS_AND_MAINTENANCE	rs13322072	3	179282730	PIK3CA	rs4917904	10	102447292	ACTR1A	dominant	0.226415	0.26859	1.13575	0.797017	protective	NA
KEGG_NEUROTROPHIN_SIGNALING_PATHWAY	REACTOME_ORGANELLE_BIOGENESIS_AND_MAINTENANCE	rs998521	15	66407072	MAP2K1	rs12935211	16	58015332	CNGB1	dominant	0.214206	0.261931	1.13538	0.768128	protective	NA
KEGG_NEUROTROPHIN_SIGNALING_PATHWAY	REACTOME_ORGANELLE_BIOGENESIS_AND_MAINTENANCE	rs3861824	1	58807217	JUN	rs12679073	8	130222310	ASAP1	dominant	0.0832408	0.108768	1.13514	0.743996	protective	NA
KEGG_NEUROTROPHIN_SIGNALING_PATHWAY	REACTOME_ORGANELLE_BIOGENESIS_AND_MAINTENANCE	rs4144887	6	166747512	RPS6KA2	rs2072826	6	135253558	AHI1	dominant	0.196448	0.229745	1.13446	0.819641	protective	0.002
KEGG_NEUROTROPHIN_SIGNALING_PATHWAY	REACTOME_ORGANELLE_BIOGENESIS_AND_MAINTENANCE	rs2075076	7	44274642	CAMK2B	rs2021883	7	33122453	BBS9	recessive_dominant	0.0599334	0.0832408	1.13444	0.702149	protective	2.321e-04
KEGG_NEUROTROPHIN_SIGNALING_PATHWAY	REACTOME_ORGANELLE_BIOGENESIS_AND_MAINTENANCE	rs2908290	7	44216137	CAMK2B	rs771795	3	101718657	CEP97	dominant	0.432852	0.475028	1.13443	0.843453	protective	NA
KEGG_NEUROTROPHIN_SIGNALING_PATHWAY	REACTOME_ORGANELLE_BIOGENESIS_AND_MAINTENANCE	rs3128321	1	1953252	CALML6	rs12819938	12	119702178	PRKAB1	recessive	0.00554939	0.0166482	1.1343	0.329613	protective	NA
KEGG_NEUROTROPHIN_SIGNALING_PATHWAY	REACTOME_ORGANELLE_BIOGENESIS_AND_MAINTENANCE	rs11102837	1	115346655	NGF	rs6593798	1	147135704	PRKAB2	recessive_dominant	0.0244173	0.0399556	1.13394	0.601378	protective	0.002
KEGG_NEUROTROPHIN_SIGNALING_PATHWAY	REACTOME_ORGANELLE_BIOGENESIS_AND_MAINTENANCE	rs12425324	12	111407697	SH2B3	rs76940793	3	160447833	IFT80	recessive_dominant	0.00110988	0.00443951	1.13342	0.249167	protective	NA
KEGG_NEUROTROPHIN_SIGNALING_PATHWAY	REACTOME_ORGANELLE_BIOGENESIS_AND_MAINTENANCE	rs36133170	6	166600960	RPS6KA2	rs10460000	18	12320551	TUBB6	recessive_dominant	0.00221976	0.00776915	1.13307	0.284125	protective	NA
KEGG_NEUROTROPHIN_SIGNALING_PATHWAY	REACTOME_ORGANELLE_BIOGENESIS_AND_MAINTENANCE	rs10806852	6	166864334	RPS6KA2	rs11419917	22	31576509	SFI1	recessive	0.00110988	0.00776915	1.13272	0.141905	protective	NA
KEGG_NEUROTROPHIN_SIGNALING_PATHWAY	REACTOME_ORGANELLE_BIOGENESIS_AND_MAINTENANCE	rs200089036	19	38902723	NFKBIB	rs6464184	7	151625412	PRKAG2	recessive_dominant	0.0865705	0.112098	1.13253	0.750695	protective	NA
KEGG_NEUROTROPHIN_SIGNALING_PATHWAY	REACTOME_ORGANELLE_BIOGENESIS_AND_MAINTENANCE	rs201635960	5	180199887	MAPK9	rs536327334	13	20581760	IFT88	dominant	0.411765	0.45172	1.13224	0.849631	protective	NA
KEGG_NEUROTROPHIN_SIGNALING_PATHWAY	REACTOME_ORGANELLE_BIOGENESIS_AND_MAINTENANCE	rs56002030	19	49073984	NTF4	rs1821526	12	94388174	CEP83	dominant	0.257492	0.295228	1.13203	0.827854	protective	NA
KEGG_NEUROTROPHIN_SIGNALING_PATHWAY	REACTOME_ORGANELLE_BIOGENESIS_AND_MAINTENANCE	rs112761996	7	6329248	RAC1	rs73916491	20	59046695	TUBB1	dominant	0.00665927	0.017758	1.13179	0.37081	protective	NA
KEGG_NEUROTROPHIN_SIGNALING_PATHWAY	REACTOME_ORGANELLE_BIOGENESIS_AND_MAINTENANCE	rs10772805	12	14912466	ARHGDIB	rs62151837	2	73390396	ALMS1	recessive_dominant	0.129856	0.160932	1.13176	0.778079	protective	NA
KEGG_NEUROTROPHIN_SIGNALING_PATHWAY	REACTOME_ORGANELLE_BIOGENESIS_AND_MAINTENANCE	rs10806852	6	166864334	RPS6KA2	rs200502024	3	121820354	IQCB1	dominant	0.0566038	0.0776915	1.13173	0.712286	protective	NA
KEGG_NEUROTROPHIN_SIGNALING_PATHWAY	REACTOME_ORGANELLE_BIOGENESIS_AND_MAINTENANCE	rs9786966	1	3623414	TP73	rs2072826	6	135253558	AHI1	recessive_dominant	0.0443951	0.0654828	1.1309	0.663005	protective	NA
KEGG_NEUROTROPHIN_SIGNALING_PATHWAY	REACTOME_ORGANELLE_BIOGENESIS_AND_MAINTENANCE	rs13322072	3	179282730	PIK3CA	rs2311600	2	121340676	CLASP1	dominant	0.398446	0.445061	1.13003	0.825887	protective	NA
KEGG_NEUROTROPHIN_SIGNALING_PATHWAY	REACTOME_ORGANELLE_BIOGENESIS_AND_MAINTENANCE	rs201635960	5	180199887	MAPK9	rs112830612	9	19007971	HAUS6	recessive_dominant	0	0.00665927	1.13001	0	protective	NA
KEGG_NEUROTROPHIN_SIGNALING_PATHWAY	REACTOME_ORGANELLE_BIOGENESIS_AND_MAINTENANCE	rs8142362	22	20979079	CRKL	rs34144731	4	55921913	CEP135/EXOC1	recessive_dominant	0.00665927	0.0188679	1.12976	0.348603	protective	NA
KEGG_NEUROTROPHIN_SIGNALING_PATHWAY	REACTOME_ORGANELLE_BIOGENESIS_AND_MAINTENANCE	rs2517	9	130855035	ABL1	rs201143490	9	136452021	INPP5E	dominant	0.17758	0.211987	1.12932	0.802651	protective	4.538e-06
KEGG_NEUROTROPHIN_SIGNALING_PATHWAY	REACTOME_ORGANELLE_BIOGENESIS_AND_MAINTENANCE	rs7805383	7	140908104	BRAF	rs1917460	11	103527656	DYNC2H1	recessive_dominant	0.126526	0.159822	1.12875	0.761489	protective	NA
KEGG_NEUROTROPHIN_SIGNALING_PATHWAY	REACTOME_ORGANELLE_BIOGENESIS_AND_MAINTENANCE	rs10413331	19	58203728	ZNF274	rs12679073	8	130222310	ASAP1	recessive_dominant	0.0510544	0.0710322	1.1287	0.703618	protective	NA
KEGG_NEUROTROPHIN_SIGNALING_PATHWAY	REACTOME_ORGANELLE_BIOGENESIS_AND_MAINTENANCE	rs759228	22	20998186	CRKL	rs11168720	12	49146750	TUBA1A/TUBA1B	recessive_dominant	0.00110988	0.00665927	1.1283	0.165741	protective	NA
KEGG_NEUROTROPHIN_SIGNALING_PATHWAY	REACTOME_ORGANELLE_BIOGENESIS_AND_MAINTENANCE	rs4877972	9	88989455	SHC3	rs2065994	1	243265536	SDCCAG8	dominant	0.432852	0.473918	1.12787	0.847216	protective	NA
KEGG_NEUROTROPHIN_SIGNALING_PATHWAY	REACTOME_ORGANELLE_BIOGENESIS_AND_MAINTENANCE	rs2169633	15	66467291	MAP2K1	rs6855480	4	23747576	PPARGC1A	dominant	0.147614	0.1798	1.12775	0.789987	protective	NA
KEGG_NEUROTROPHIN_SIGNALING_PATHWAY	REACTOME_ORGANELLE_BIOGENESIS_AND_MAINTENANCE	rs4791329	17	7693455	TP53	rs16996724	22	36772774	IFT27	dominant	0.0699223	0.102109	1.12769	0.661085	protective	NA
KEGG_NEUROTROPHIN_SIGNALING_PATHWAY	REACTOME_ORGANELLE_BIOGENESIS_AND_MAINTENANCE	rs7033070	9	131586374	RAPGEF1	rs1365962	2	218857832	PRKAG3	recessive_dominant	0.0854606	0.112098	1.12761	0.740171	protective	NA
KEGG_NEUROTROPHIN_SIGNALING_PATHWAY	REACTOME_ORGANELLE_BIOGENESIS_AND_MAINTENANCE	rs112761996	7	6329248	RAC1	rs6074138	20	10418801	MKKS	recessive_dominant	0	0.00332963	1.12742	0	protective	NA
KEGG_NEUROTROPHIN_SIGNALING_PATHWAY	REACTOME_ORGANELLE_BIOGENESIS_AND_MAINTENANCE	rs2537850	14	90970875	RPS6KA5	rs12302358	12	110239437	IFT81	recessive_dominant	0.0122087	0.0244173	1.12742	0.49382	protective	NA
KEGG_NEUROTROPHIN_SIGNALING_PATHWAY	REACTOME_ORGANELLE_BIOGENESIS_AND_MAINTENANCE	rs2803965	14	73098014	PSEN1	rs12761305	10	92814031	EXOC6	dominant	0.320755	0.36071	1.1272	0.836923	protective	NA
KEGG_NEUROTROPHIN_SIGNALING_PATHWAY	REACTOME_ORGANELLE_BIOGENESIS_AND_MAINTENANCE	rs12986190	19	40273038	AKT2	rs2130923	4	23781504	PPARGC1A	dominant	0.157603	0.189789	1.1267	0.798681	protective	NA
KEGG_NEUROTROPHIN_SIGNALING_PATHWAY	REACTOME_ORGANELLE_BIOGENESIS_AND_MAINTENANCE	rs10413331	19	58203728	ZNF274	rs11707509	3	196346629	TCTEX1D2	recessive	0.00776915	0.0210877	1.12655	0.363476	protective	NA
KEGG_NEUROTROPHIN_SIGNALING_PATHWAY	REACTOME_ORGANELLE_BIOGENESIS_AND_MAINTENANCE	rs55967668	5	68241438	PIK3R1	rs7247709	19	52240015	PPP2R1A	dominant	0.193119	0.231964	1.12638	0.792455	protective	NA
KEGG_NEUROTROPHIN_SIGNALING_PATHWAY	REACTOME_ORGANELLE_BIOGENESIS_AND_MAINTENANCE	rs8073151	17	1495834	CRK	rs7804751	7	151645370	PRKAG2	recessive_dominant	0.157603	0.200888	1.12633	0.744219	protective	NA
KEGG_NEUROTROPHIN_SIGNALING_PATHWAY	REACTOME_ORGANELLE_BIOGENESIS_AND_MAINTENANCE	rs2239798	6	36177857	MAPK13	rs1015410	7	107134828	PRKAR2B	recessive_dominant	0.017758	0.0321865	1.12623	0.54362	protective	NA
KEGG_NEUROTROPHIN_SIGNALING_PATHWAY	REACTOME_ORGANELLE_BIOGENESIS_AND_MAINTENANCE	rs9759629	4	113743604	CAMK2D	rs6751305	2	61876220	CCT4	recessive_dominant	0.152053	0.18424	1.1259	0.793974	protective	NA
KEGG_NEUROTROPHIN_SIGNALING_PATHWAY	REACTOME_ORGANELLE_BIOGENESIS_AND_MAINTENANCE	rs9786966	1	3623414	TP73	rs6432044	2	10041284	CYS1	recessive_dominant	0.0965594	0.130966	1.1257	0.70921	protective	NA
KEGG_NEUROTROPHIN_SIGNALING_PATHWAY	REACTOME_ORGANELLE_BIOGENESIS_AND_MAINTENANCE	rs10413331	19	58203728	ZNF274	rs10418927	19	16168734	RAB8A	recessive	0.0144284	0.0277469	1.12467	0.512973	protective	0.002
KEGG_NEUROTROPHIN_SIGNALING_PATHWAY	REACTOME_ORGANELLE_BIOGENESIS_AND_MAINTENANCE	rs10413331	19	58203728	ZNF274	rs6074138	20	10418801	MKKS	recessive	0.0144284	0.0277469	1.12467	0.512973	protective	NA
KEGG_NEUROTROPHIN_SIGNALING_PATHWAY	REACTOME_ORGANELLE_BIOGENESIS_AND_MAINTENANCE	rs4144887	6	166747512	RPS6KA2	rs7790557	7	129759641	NRF1	recessive_dominant	0.0188679	0.0332963	1.12464	0.558333	protective	NA
KEGG_NEUROTROPHIN_SIGNALING_PATHWAY	REACTOME_ORGANELLE_BIOGENESIS_AND_MAINTENANCE	rs62315570	4	86331750	MAPK10	rs2021883	7	33122453	BBS9	recessive	0.0188679	0.0332963	1.12464	0.558333	protective	NA
KEGG_NEUROTROPHIN_SIGNALING_PATHWAY	REACTOME_ORGANELLE_BIOGENESIS_AND_MAINTENANCE	rs2239798	6	36177857	MAPK13	rs6751305	2	61876220	CCT4	dominant	0.250832	0.287458	1.12463	0.829927	protective	NA
KEGG_NEUROTROPHIN_SIGNALING_PATHWAY	REACTOME_ORGANELLE_BIOGENESIS_AND_MAINTENANCE	rs7482257	11	27755298	BDNF	rs9678422	2	169532214	BBS5	recessive_dominant	0.0221976	0.0377358	1.12412	0.578888	protective	NA
KEGG_NEUROTROPHIN_SIGNALING_PATHWAY	REACTOME_ORGANELLE_BIOGENESIS_AND_MAINTENANCE	rs2803965	14	73098014	PSEN1	rs2105847	4	2271113	HAUS3	dominant	0.27414	0.312986	1.12383	0.829012	protective	NA
KEGG_NEUROTROPHIN_SIGNALING_PATHWAY	REACTOME_ORGANELLE_BIOGENESIS_AND_MAINTENANCE	rs139443871	19	4165336	MAP2K2	rs10812525	9	27084462	IFT74	recessive_dominant	0.099889	0.128746	1.12371	0.750989	protective	NA
KEGG_NEUROTROPHIN_SIGNALING_PATHWAY	REACTOME_ORGANELLE_BIOGENESIS_AND_MAINTENANCE	rs11102837	1	115346655	NGF	rs113582339	7	151529654	PRKAG2	recessive	0.00221976	0.0110988	1.12315	0.19822	protective	NA
KEGG_NEUROTROPHIN_SIGNALING_PATHWAY	REACTOME_ORGANELLE_BIOGENESIS_AND_MAINTENANCE	rs2087072	1	243829549	AKT3	rs9294982	6	169696898	TCTE3	recessive_dominant	0.122087	0.150943	1.12249	0.782238	protective	NA
KEGG_NEUROTROPHIN_SIGNALING_PATHWAY	REACTOME_ORGANELLE_BIOGENESIS_AND_MAINTENANCE	rs557328	19	7902965	MAP2K7	rs7129263	11	248077	SIRT3	recessive_dominant	0.0566038	0.0799112	1.12238	0.690833	protective	NA
KEGG_NEUROTROPHIN_SIGNALING_PATHWAY	REACTOME_ORGANELLE_BIOGENESIS_AND_MAINTENANCE	rs71166958	19	4089029	MAP2K2	rs12302358	12	110239437	IFT81	recessive_dominant	0.00443951	0.0133185	1.12195	0.33036	protective	NA
KEGG_NEUROTROPHIN_SIGNALING_PATHWAY	REACTOME_ORGANELLE_BIOGENESIS_AND_MAINTENANCE	rs2239798	6	36177857	MAPK13	rs11707509	3	196346629	TCTEX1D2	recessive	0.00554939	0.017758	1.12185	0.308664	protective	NA
KEGG_NEUROTROPHIN_SIGNALING_PATHWAY	REACTOME_ORGANELLE_BIOGENESIS_AND_MAINTENANCE	rs3861824	1	58807217	JUN	rs10416968	19	41407637	B9D2	dominant	0.0976693	0.125416	1.12183	0.754814	protective	NA
KEGG_NEUROTROPHIN_SIGNALING_PATHWAY	REACTOME_ORGANELLE_BIOGENESIS_AND_MAINTENANCE	rs557328	19	7902965	MAP2K7	rs12302358	12	110239437	IFT81	dominant	0.108768	0.143174	1.12179	0.730362	protective	NA
KEGG_NEUROTROPHIN_SIGNALING_PATHWAY	REACTOME_ORGANELLE_BIOGENESIS_AND_MAINTENANCE	rs55967668	5	68241438	PIK3R1	rs2369963	3	132730101	NPHP3	dominant	0.173141	0.205327	1.12073	0.810419	protective	NA
KEGG_NEUROTROPHIN_SIGNALING_PATHWAY	REACTOME_ORGANELLE_BIOGENESIS_AND_MAINTENANCE	rs17051913	9	89061524	SHC3	rs2489138	1	156526564	MEF2D	dominant	0.225305	0.26859	1.12069	0.791974	protective	NA
KEGG_NEUROTROPHIN_SIGNALING_PATHWAY	REACTOME_ORGANELLE_BIOGENESIS_AND_MAINTENANCE	rs55702801	14	73255495	PSEN1	rs55924499	7	151517706	PRKAG2	dominant	0.137625	0.172031	1.12049	0.768082	protective	NA
KEGG_NEUROTROPHIN_SIGNALING_PATHWAY	REACTOME_ORGANELLE_BIOGENESIS_AND_MAINTENANCE	rs2087072	1	243829549	AKT3	rs12761305	10	92814031	EXOC6	recessive_dominant	0.128746	0.159822	1.12023	0.776822	protective	NA
KEGG_NEUROTROPHIN_SIGNALING_PATHWAY	REACTOME_ORGANELLE_BIOGENESIS_AND_MAINTENANCE	rs759228	22	20998186	CRKL	rs2280545	11	204147	SIRT3	recessive_dominant	0	0.00554939	1.12019	0	protective	NA
KEGG_NEUROTROPHIN_SIGNALING_PATHWAY	REACTOME_ORGANELLE_BIOGENESIS_AND_MAINTENANCE	rs7033070	9	131586374	RAPGEF1	rs12302358	12	110239437	IFT81	dominant	0.158713	0.194229	1.12009	0.782646	protective	NA
KEGG_NEUROTROPHIN_SIGNALING_PATHWAY	REACTOME_ORGANELLE_BIOGENESIS_AND_MAINTENANCE	rs55967668	5	68241438	PIK3R1	rs7783031	7	151590143	PRKAG2	dominant	0.132075	0.162042	1.11981	0.786927	protective	NA
KEGG_NEUROTROPHIN_SIGNALING_PATHWAY	REACTOME_ORGANELLE_BIOGENESIS_AND_MAINTENANCE	rs3861824	1	58807217	JUN	rs2748246	5	149795273	PPARGC1B	dominant	0.0887902	0.117647	1.11959	0.730816	protective	NA
KEGG_NEUROTROPHIN_SIGNALING_PATHWAY	REACTOME_ORGANELLE_BIOGENESIS_AND_MAINTENANCE	rs2612043	12	66183500	IRAK3	rs10812525	9	27084462	IFT74	dominant	0.17869	0.210877	1.11951	0.814161	protective	NA
KEGG_NEUROTROPHIN_SIGNALING_PATHWAY	REACTOME_ORGANELLE_BIOGENESIS_AND_MAINTENANCE	rs71166958	19	4089029	MAP2K2	rs11287280	3	45836823	LZTFL1	recessive_dominant	0.00665927	0.017758	1.1191	0.37081	protective	NA
KEGG_NEUROTROPHIN_SIGNALING_PATHWAY	REACTOME_ORGANELLE_BIOGENESIS_AND_MAINTENANCE	rs56002030	19	49073984	NTF4	rs13288249	9	78211618	CEP78	recessive_dominant	0.0865705	0.120977	1.11895	0.688642	protective	NA
KEGG_NEUROTROPHIN_SIGNALING_PATHWAY	REACTOME_ORGANELLE_BIOGENESIS_AND_MAINTENANCE	rs7033070	9	131586374	RAPGEF1	rs7214893	17	76140308	EXOC7	dominant	0.308546	0.351831	1.1189	0.822073	protective	NA
KEGG_NEUROTROPHIN_SIGNALING_PATHWAY	REACTOME_ORGANELLE_BIOGENESIS_AND_MAINTENANCE	rs55894401	16	81730962	PLCG2	rs7798741	7	33585000	BBS9	recessive_dominant	0.0677026	0.0899001	1.11889	0.735156	protective	NA
KEGG_NEUROTROPHIN_SIGNALING_PATHWAY	REACTOME_ORGANELLE_BIOGENESIS_AND_MAINTENANCE	rs9347129	6	166895934	RPS6KA2	rs71421442	14	57152633	EXOC5	recessive_dominant	0.0099889	0.0233074	1.11882	0.422806	protective	NA
KEGG_NEUROTROPHIN_SIGNALING_PATHWAY	REACTOME_ORGANELLE_BIOGENESIS_AND_MAINTENANCE	rs557328	19	7902965	MAP2K7	rs7476037	10	5376275	TUBAL3	dominant	0.27081	0.314095	1.11876	0.811011	protective	NA
KEGG_NEUROTROPHIN_SIGNALING_PATHWAY	REACTOME_ORGANELLE_BIOGENESIS_AND_MAINTENANCE	rs1902716	10	48395086	MAPK8	rs34144731	4	55921913	CEP135/EXOC1	recessive_dominant	0.00554939	0.017758	1.1186	0.308664	protective	NA
KEGG_NEUROTROPHIN_SIGNALING_PATHWAY	REACTOME_ORGANELLE_BIOGENESIS_AND_MAINTENANCE	rs6094276	20	44949946	YWHAB	rs890980	5	477303	EXOC3	recessive_dominant	0.114317	0.145394	1.11847	0.758671	protective	NA
KEGG_NEUROTROPHIN_SIGNALING_PATHWAY	REACTOME_ORGANELLE_BIOGENESIS_AND_MAINTENANCE	rs2169633	15	66467291	MAP2K1	rs2671332	11	103231440	DYNC2H1	recessive	0.0244173	0.0421754	1.11821	0.568409	protective	NA
KEGG_NEUROTROPHIN_SIGNALING_PATHWAY	REACTOME_ORGANELLE_BIOGENESIS_AND_MAINTENANCE	rs7222654	17	8932404	PIK3R5	rs1709535	5	616781	CEP72	recessive	0.00665927	0.017758	1.11806	0.37081	protective	NA
KEGG_NEUROTROPHIN_SIGNALING_PATHWAY	REACTOME_ORGANELLE_BIOGENESIS_AND_MAINTENANCE	rs9759629	4	113743604	CAMK2D	rs1396893	8	55779322	TGS1	dominant	0.36626	0.405105	1.11798	0.848691	protective	NA
KEGG_NEUROTROPHIN_SIGNALING_PATHWAY	REACTOME_ORGANELLE_BIOGENESIS_AND_MAINTENANCE	rs2517	9	130855035	ABL1	rs9348164	6	167071948	FGFR1OP	recessive	0.00332963	0.0110988	1.11728	0.297661	protective	NA
KEGG_NEUROTROPHIN_SIGNALING_PATHWAY	REACTOME_ORGANELLE_BIOGENESIS_AND_MAINTENANCE	rs139443871	19	4165336	MAP2K2	rs6961764	7	133131298	CHCHD3	recessive_dominant	0.116537	0.146504	1.11721	0.768473	protective	NA
KEGG_NEUROTROPHIN_SIGNALING_PATHWAY	REACTOME_ORGANELLE_BIOGENESIS_AND_MAINTENANCE	rs6916254	6	136738115	MAP3K5	rs36222127	17	75876781	FBF1	recessive_dominant	0.00554939	0.0155383	1.11673	0.353555	protective	NA
KEGG_NEUROTROPHIN_SIGNALING_PATHWAY	REACTOME_ORGANELLE_BIOGENESIS_AND_MAINTENANCE	rs2537850	14	90970875	RPS6KA5	rs1821526	12	94388174	CEP83	recessive_dominant	0.0477248	0.0699223	1.11655	0.66663	protective	NA
KEGG_NEUROTROPHIN_SIGNALING_PATHWAY	REACTOME_ORGANELLE_BIOGENESIS_AND_MAINTENANCE	rs200089036	19	38902723	NFKBIB	rs10421830	19	45210634	MARK4	recessive_dominant	0.0554939	0.0776915	1.11652	0.697499	protective	7.787e-05
KEGG_NEUROTROPHIN_SIGNALING_PATHWAY	REACTOME_ORGANELLE_BIOGENESIS_AND_MAINTENANCE	rs998521	15	66407072	MAP2K1	rs2130923	4	23781504	PPARGC1A	recessive	0.00110988	0.00776915	1.1163	0.141905	protective	NA
KEGG_NEUROTROPHIN_SIGNALING_PATHWAY	REACTOME_ORGANELLE_BIOGENESIS_AND_MAINTENANCE	rs529025836	17	63636272	MAP3K3	rs2489138	1	156526564	MEF2D	recessive_dominant	0.144284	0.18313	1.11625	0.752113	protective	NA
KEGG_NEUROTROPHIN_SIGNALING_PATHWAY	REACTOME_ORGANELLE_BIOGENESIS_AND_MAINTENANCE	rs6916254	6	136738115	MAP3K5	rs10416968	19	41407637	B9D2	recessive_dominant	0.00887902	0.0199778	1.11623	0.439467	protective	NA
KEGG_NEUROTROPHIN_SIGNALING_PATHWAY	REACTOME_ORGANELLE_BIOGENESIS_AND_MAINTENANCE	rs2075076	7	44274642	CAMK2B	rs7438356	4	15624770	CC2D2A	recessive_dominant	0.0510544	0.0699223	1.11622	0.715641	protective	NA
KEGG_NEUROTROPHIN_SIGNALING_PATHWAY	REACTOME_ORGANELLE_BIOGENESIS_AND_MAINTENANCE	rs557328	19	7902965	MAP2K7	rs4273371	3	108119071	IFT57	recessive_dominant	0.0732519	0.0976693	1.11622	0.73024	protective	NA
KEGG_NEUROTROPHIN_SIGNALING_PATHWAY	REACTOME_ORGANELLE_BIOGENESIS_AND_MAINTENANCE	rs2075076	7	44274642	CAMK2B	rs9294982	6	169696898	TCTE3	recessive	0.0122087	0.0255272	1.11617	0.471812	protective	NA
KEGG_NEUROTROPHIN_SIGNALING_PATHWAY	REACTOME_ORGANELLE_BIOGENESIS_AND_MAINTENANCE	rs629608	1	111738116	RAP1A	rs2234182	19	6535080	TUBB4A	recessive	0.0122087	0.0255272	1.11558	0.471812	protective	NA
KEGG_NEUROTROPHIN_SIGNALING_PATHWAY	REACTOME_ORGANELLE_BIOGENESIS_AND_MAINTENANCE	rs12986190	19	40273038	AKT2	rs4287754	2	61906147	CCT4	dominant	0.0799112	0.105438	1.11535	0.736868	protective	NA
KEGG_NEUROTROPHIN_SIGNALING_PATHWAY	REACTOME_ORGANELLE_BIOGENESIS_AND_MAINTENANCE	rs1018102	1	22041073	CDC42	rs11432188	9	34575985	DCTN3	dominant	0.203108	0.239734	1.11533	0.808283	protective	NA
KEGG_NEUROTROPHIN_SIGNALING_PATHWAY	REACTOME_ORGANELLE_BIOGENESIS_AND_MAINTENANCE	rs10806852	6	166864334	RPS6KA2	rs1365962	2	218857832	PRKAG3	recessive_dominant	0.0466149	0.0688124	1.11513	0.661647	protective	NA
KEGG_NEUROTROPHIN_SIGNALING_PATHWAY	REACTOME_ORGANELLE_BIOGENESIS_AND_MAINTENANCE	rs629608	1	111738116	RAP1A	rs7966731	12	96871649	NEDD1	recessive	0.0355161	0.0532741	1.11485	0.654392	protective	NA
KEGG_NEUROTROPHIN_SIGNALING_PATHWAY	REACTOME_ORGANELLE_BIOGENESIS_AND_MAINTENANCE	rs112761996	7	6329248	RAC1	rs4870337	6	155312789	TFB1M	dominant	0.0199778	0.0355161	1.11464	0.553582	protective	NA
KEGG_NEUROTROPHIN_SIGNALING_PATHWAY	REACTOME_ORGANELLE_BIOGENESIS_AND_MAINTENANCE	rs8142362	22	20979079	CRKL	rs7438356	4	15624770	CC2D2A	recessive	0.0166482	0.0321865	1.11437	0.509068	protective	NA
KEGG_NEUROTROPHIN_SIGNALING_PATHWAY	REACTOME_ORGANELLE_BIOGENESIS_AND_MAINTENANCE	rs12425324	12	111407697	SH2B3	rs7129263	11	248077	SIRT3	recessive_dominant	0.0499445	0.0721421	1.11431	0.676132	protective	NA
KEGG_NEUROTROPHIN_SIGNALING_PATHWAY	REACTOME_ORGANELLE_BIOGENESIS_AND_MAINTENANCE	rs6072793	20	41185524	PLCG1	rs528424379	16	23661801	PLK1	dominant	0.107658	0.137625	1.11425	0.755988	protective	NA
KEGG_NEUROTROPHIN_SIGNALING_PATHWAY	REACTOME_ORGANELLE_BIOGENESIS_AND_MAINTENANCE	rs10413331	19	58203728	ZNF274	rs1611011	13	20695628	IFT88	recessive_dominant	0.0466149	0.0665927	1.11423	0.685332	protective	NA
KEGG_NEUROTROPHIN_SIGNALING_PATHWAY	REACTOME_ORGANELLE_BIOGENESIS_AND_MAINTENANCE	rs12425324	12	111407697	SH2B3	rs2790035	9	128439923	ODF2	recessive_dominant	0.150943	0.18313	1.11416	0.792997	protective	NA
KEGG_NEUROTROPHIN_SIGNALING_PATHWAY	REACTOME_ORGANELLE_BIOGENESIS_AND_MAINTENANCE	rs2087072	1	243829549	AKT3	rs10460000	18	12320551	TUBB6	recessive_dominant	0.0843507	0.110988	1.11415	0.737891	protective	NA
KEGG_NEUROTROPHIN_SIGNALING_PATHWAY	REACTOME_ORGANELLE_BIOGENESIS_AND_MAINTENANCE	rs55702801	14	73255495	PSEN1	rs2105847	4	2271113	HAUS3	dominant	0.138735	0.173141	1.11393	0.769272	protective	NA
KEGG_NEUROTROPHIN_SIGNALING_PATHWAY	REACTOME_ORGANELLE_BIOGENESIS_AND_MAINTENANCE	rs12425324	12	111407697	SH2B3	rs2388229	16	53556997	RPGRIP1L	recessive_dominant	0.146504	0.17758	1.11369	0.794961	protective	NA
KEGG_NEUROTROPHIN_SIGNALING_PATHWAY	REACTOME_ORGANELLE_BIOGENESIS_AND_MAINTENANCE	rs56002030	19	49073984	NTF4	rs11668155	19	52247306	PPP2R1A	dominant	0.311876	0.350721	1.113	0.839041	protective	0.005
KEGG_NEUROTROPHIN_SIGNALING_PATHWAY	REACTOME_ORGANELLE_BIOGENESIS_AND_MAINTENANCE	rs9347129	6	166895934	RPS6KA2	rs59972802	17	2672013	PAFAH1B1	recessive_dominant	0.0110988	0.0244173	1.11268	0.448424	protective	NA
KEGG_NEUROTROPHIN_SIGNALING_PATHWAY	REACTOME_ORGANELLE_BIOGENESIS_AND_MAINTENANCE	rs1902716	10	48395086	MAPK8	rs10460000	18	12320551	TUBB6	recessive_dominant	0.0421754	0.0643729	1.11144	0.639989	protective	NA
KEGG_NEUROTROPHIN_SIGNALING_PATHWAY	REACTOME_ORGANELLE_BIOGENESIS_AND_MAINTENANCE	rs7222654	17	8932404	PIK3R5	rs71421442	14	57152633	EXOC5	recessive_dominant	0.0321865	0.0510544	1.11133	0.618144	protective	NA
KEGG_NEUROTROPHIN_SIGNALING_PATHWAY	REACTOME_ORGANELLE_BIOGENESIS_AND_MAINTENANCE	rs12986190	19	40273038	AKT2	rs12819938	12	119702178	PRKAB1	recessive	0.0110988	0.0244173	1.11073	0.448424	protective	NA
KEGG_NEUROTROPHIN_SIGNALING_PATHWAY	REACTOME_ORGANELLE_BIOGENESIS_AND_MAINTENANCE	rs8078982	17	49485912	NGFR	rs11896513	2	219219183	TUBA4A/TUBA4B	recessive_dominant	0.00887902	0.0199778	1.10997	0.439467	protective	NA
KEGG_NEUROTROPHIN_SIGNALING_PATHWAY	REACTOME_ORGANELLE_BIOGENESIS_AND_MAINTENANCE	rs6094276	20	44949946	YWHAB	rs4531944	2	166001810	TTC21B	recessive_dominant	0.0288568	0.045505	1.10989	0.623275	protective	NA
KEGG_NEUROTROPHIN_SIGNALING_PATHWAY	REACTOME_ORGANELLE_BIOGENESIS_AND_MAINTENANCE	rs11063604	12	5408423	NTF3	rs73054883	19	52207932	PPP2R1A	recessive_dominant	0.00332963	0.0122087	1.10944	0.270298	protective	NA
KEGG_NEUROTROPHIN_SIGNALING_PATHWAY	REACTOME_ORGANELLE_BIOGENESIS_AND_MAINTENANCE	rs10806852	6	166864334	RPS6KA2	rs2018797	7	129210004	SMO	recessive_dominant	0.0499445	0.0699223	1.10937	0.699266	protective	NA
KEGG_NEUROTROPHIN_SIGNALING_PATHWAY	REACTOME_ORGANELLE_BIOGENESIS_AND_MAINTENANCE	rs10806852	6	166864334	RPS6KA2	rs28588283	4	55820993	EXOC1	recessive_dominant	0.0488346	0.0688124	1.10855	0.694772	protective	NA
KEGG_NEUROTROPHIN_SIGNALING_PATHWAY	REACTOME_ORGANELLE_BIOGENESIS_AND_MAINTENANCE	rs17051913	9	89061524	SHC3	rs4959880	6	442206	EXOC2	dominant	0.190899	0.228635	1.10837	0.79601	protective	NA
KEGG_NEUROTROPHIN_SIGNALING_PATHWAY	REACTOME_ORGANELLE_BIOGENESIS_AND_MAINTENANCE	rs4820983	22	31929654	YWHAH	rs896806	2	19961843	WDR35	recessive	0.036626	0.054384	1.10827	0.661055	protective	NA
KEGG_NEUROTROPHIN_SIGNALING_PATHWAY	REACTOME_ORGANELLE_BIOGENESIS_AND_MAINTENANCE	rs11063604	12	5408423	NTF3	rs2058594	14	76039214	IFT43	recessive_dominant	0.0166482	0.0321865	1.10814	0.509068	protective	NA
KEGG_NEUROTROPHIN_SIGNALING_PATHWAY	REACTOME_ORGANELLE_BIOGENESIS_AND_MAINTENANCE	rs9759629	4	113743604	CAMK2D	rs2388229	16	53556997	RPGRIP1L	dominant	0.422863	0.462819	1.10796	0.850415	protective	NA
KEGG_NEUROTROPHIN_SIGNALING_PATHWAY	REACTOME_ORGANELLE_BIOGENESIS_AND_MAINTENANCE	rs2908290	7	44216137	CAMK2B	rs4917904	10	102447292	ACTR1A	recessive_dominant	0.0421754	0.0654828	1.10755	0.628395	protective	NA
KEGG_NEUROTROPHIN_SIGNALING_PATHWAY	REACTOME_ORGANELLE_BIOGENESIS_AND_MAINTENANCE	rs13322072	3	179282730	PIK3CA	rs28716841	5	132733467	KIF3A	recessive_dominant	0.0133185	0.0288568	1.10752	0.45427	protective	NA
KEGG_NEUROTROPHIN_SIGNALING_PATHWAY	REACTOME_ORGANELLE_BIOGENESIS_AND_MAINTENANCE	rs6094276	20	44949946	YWHAB	rs10077397	5	88903298	MEF2C	recessive_dominant	0.0332963	0.0510544	1.10735	0.640194	protective	NA
KEGG_NEUROTROPHIN_SIGNALING_PATHWAY	REACTOME_ORGANELLE_BIOGENESIS_AND_MAINTENANCE	rs4820983	22	31929654	YWHAH	rs746884	20	59067268	TUBB1	recessive	0.0244173	0.0399556	1.10718	0.601378	protective	NA
KEGG_NEUROTROPHIN_SIGNALING_PATHWAY	REACTOME_ORGANELLE_BIOGENESIS_AND_MAINTENANCE	rs11102837	1	115346655	NGF	rs4726122	7	151675463	PRKAG2	dominant	0.374029	0.413984	1.10707	0.845816	protective	NA
KEGG_NEUROTROPHIN_SIGNALING_PATHWAY	REACTOME_ORGANELLE_BIOGENESIS_AND_MAINTENANCE	rs529025836	17	63636272	MAP3K3	rs6534321	4	122692023	BBS12	recessive_dominant	0.0654828	0.0921199	1.10696	0.690582	protective	NA
KEGG_NEUROTROPHIN_SIGNALING_PATHWAY	REACTOME_ORGANELLE_BIOGENESIS_AND_MAINTENANCE	rs1245510	10	73799959	CAMK2G	rs6961764	7	133131298	CHCHD3	recessive_dominant	0.148724	0.18091	1.10652	0.791003	protective	NA
KEGG_NEUROTROPHIN_SIGNALING_PATHWAY	REACTOME_ORGANELLE_BIOGENESIS_AND_MAINTENANCE	rs998521	15	66407072	MAP2K1	rs74183366	19	35674986	HAUS5	dominant	0.201998	0.248613	1.10646	0.765038	protective	NA
KEGG_NEUROTROPHIN_SIGNALING_PATHWAY	REACTOME_ORGANELLE_BIOGENESIS_AND_MAINTENANCE	rs7805383	7	140908104	BRAF	rs6464184	7	151625412	PRKAG2	dominant	0.354051	0.392897	1.10643	0.846938	protective	0.006
KEGG_NEUROTROPHIN_SIGNALING_PATHWAY	REACTOME_ORGANELLE_BIOGENESIS_AND_MAINTENANCE	rs55967668	5	68241438	PIK3R1	rs4726122	7	151675463	PRKAG2	recessive	0.00110988	0.00776915	1.10625	0.141905	protective	NA
KEGG_NEUROTROPHIN_SIGNALING_PATHWAY	REACTOME_ORGANELLE_BIOGENESIS_AND_MAINTENANCE	rs7482257	11	27755298	BDNF	rs7798741	7	33585000	BBS9	recessive_dominant	0.142064	0.172031	1.10617	0.796962	protective	NA
KEGG_NEUROTROPHIN_SIGNALING_PATHWAY	REACTOME_ORGANELLE_BIOGENESIS_AND_MAINTENANCE	rs629608	1	111738116	RAP1A	rs2369963	3	132730101	NPHP3	recessive	0.0332963	0.0532741	1.10533	0.612084	protective	NA
KEGG_NEUROTROPHIN_SIGNALING_PATHWAY	REACTOME_ORGANELLE_BIOGENESIS_AND_MAINTENANCE	rs7076160	10	48473929	MAPK8	rs746884	20	59067268	TUBB1	recessive_dominant	0.0510544	0.0743618	1.10525	0.669704	protective	NA
KEGG_NEUROTROPHIN_SIGNALING_PATHWAY	REACTOME_ORGANELLE_BIOGENESIS_AND_MAINTENANCE	rs7033070	9	131586374	RAPGEF1	rs113582339	7	151529654	PRKAG2	recessive_dominant	0.0210877	0.0355161	1.10524	0.584999	protective	NA
KEGG_NEUROTROPHIN_SIGNALING_PATHWAY	REACTOME_ORGANELLE_BIOGENESIS_AND_MAINTENANCE	rs7033070	9	131586374	RAPGEF1	rs72742147	9	78289116	CEP78	dominant	0.0765816	0.099889	1.10493	0.747316	protective	0.003
KEGG_NEUROTROPHIN_SIGNALING_PATHWAY	REACTOME_ORGANELLE_BIOGENESIS_AND_MAINTENANCE	rs557328	19	7902965	MAP2K7	rs7833836	8	17935642	PCM1	dominant	0.314095	0.358491	1.10472	0.819452	protective	NA
KEGG_NEUROTROPHIN_SIGNALING_PATHWAY	REACTOME_ORGANELLE_BIOGENESIS_AND_MAINTENANCE	rs4791329	17	7693455	TP53	rs11707509	3	196346629	TCTEX1D2	recessive_dominant	0.0854606	0.110988	1.10343	0.748507	protective	NA
KEGG_NEUROTROPHIN_SIGNALING_PATHWAY	REACTOME_ORGANELLE_BIOGENESIS_AND_MAINTENANCE	rs2169633	15	66467291	MAP2K1	rs6751305	2	61876220	CCT4	recessive_dominant	0.0954495	0.123196	1.1033	0.751009	protective	NA
KEGG_NEUROTROPHIN_SIGNALING_PATHWAY	REACTOME_ORGANELLE_BIOGENESIS_AND_MAINTENANCE	rs1902716	10	48395086	MAPK8	rs1558995	7	134041704	EXOC4	recessive	0.00554939	0.0155383	1.10309	0.353555	protective	NA
KEGG_NEUROTROPHIN_SIGNALING_PATHWAY	REACTOME_ORGANELLE_BIOGENESIS_AND_MAINTENANCE	rs629608	1	111738116	RAP1A	rs4655200	1	20672101	KIF17	recessive_dominant	0.0610433	0.0843507	1.10289	0.70572	protective	3.205e-05
KEGG_NEUROTROPHIN_SIGNALING_PATHWAY	REACTOME_ORGANELLE_BIOGENESIS_AND_MAINTENANCE	rs12986190	19	40273038	AKT2	rs13288249	9	78211618	CEP78	dominant	0.192009	0.226415	1.10267	0.811928	protective	NA
KEGG_NEUROTROPHIN_SIGNALING_PATHWAY	REACTOME_ORGANELLE_BIOGENESIS_AND_MAINTENANCE	rs7398141	12	69475910	FRS2	rs7438356	4	15624770	CC2D2A	recessive	0.0099889	0.0233074	1.10225	0.422806	protective	NA
[truncated: 4,818 more rows]
