# Supplementary material for: BridGE: a pathway-based analysis tool for detecting genetic interactions from GWAS
Source: Springer Nature journal article supplement (doi:10.1038/s41596-024-00954-8), 2024-03-21
Supplement: MOESM4 [file 41596_2024_954_MOESM4_ESM10.zip]

## Sheet: Sheet1
path1	path2	snp1	chr1	loc1	gene1	snp2	chr2	loc2	gene2	GI type	case frequency	control frequency	GI	OR	effect	LD
KEGG_SNARE_INTERACTIONS_IN_VESICULAR_TRANSPORT	REACTOME_L1CAM_INTERACTIONS	rs2286845	7	93994146	BET1	rs353116	2	165277122	SCN2A	dominant	0.352056	0.40346	5.85972	0.803365	protective	NA
KEGG_SNARE_INTERACTIONS_IN_VESICULAR_TRANSPORT	REACTOME_L1CAM_INTERACTIONS	rs25680	12	6445462	VAMP1	rs353116	2	165277122	SCN2A	dominant	0.231444	0.274072	5.07306	0.797627	protective	NA
KEGG_SNARE_INTERACTIONS_IN_VESICULAR_TRANSPORT	REACTOME_L1CAM_INTERACTIONS	rs2236359	1	227747743	SNAP47	rs28568406	1	158717373	SPTA1	dominant	0.382648	0.428786	4.74513	0.825703	protective	NA
KEGG_SNARE_INTERACTIONS_IN_VESICULAR_TRANSPORT	REACTOME_L1CAM_INTERACTIONS	rs1078004	2	85542588	VAMP5/VAMP8	rs1201689	15	41813720	SPTBN5	dominant	0.413741	0.459378	4.6249	0.830544	protective	NA
KEGG_SNARE_INTERACTIONS_IN_VESICULAR_TRANSPORT	REACTOME_L1CAM_INTERACTIONS	rs1078004	2	85542588	VAMP5/VAMP8	rs694739	11	64329761	RPS6KA4	dominant	0.399699	0.445336	4.61266	0.82929	protective	NA
KEGG_SNARE_INTERACTIONS_IN_VESICULAR_TRANSPORT	REACTOME_L1CAM_INTERACTIONS	rs2236359	1	227747743	SNAP47	rs694739	11	64329761	RPS6KA4	dominant	0.369358	0.414493	4.6022	0.82733	protective	NA
KEGG_SNARE_INTERACTIONS_IN_VESICULAR_TRANSPORT	REACTOME_L1CAM_INTERACTIONS	rs4908482	1	7817428	VAMP3	rs694739	11	64329761	RPS6KA4	dominant	0.335757	0.37989	4.54439	0.825107	protective	NA
KEGG_SNARE_INTERACTIONS_IN_VESICULAR_TRANSPORT	REACTOME_L1CAM_INTERACTIONS	rs2286845	7	93994146	BET1	rs694739	11	64329761	RPS6KA4	dominant	0.332999	0.37663	4.46142	0.826319	protective	NA
KEGG_SNARE_INTERACTIONS_IN_VESICULAR_TRANSPORT	REACTOME_L1CAM_INTERACTIONS	rs1078004	2	85542588	VAMP5/VAMP8	rs353116	2	165277122	SCN2A	dominant	0.425025	0.469659	4.42206	0.834715	protective	NA
KEGG_SNARE_INTERACTIONS_IN_VESICULAR_TRANSPORT	REACTOME_L1CAM_INTERACTIONS	rs3757840	7	44191617	YKT6	rs694739	11	64329761	RPS6KA4	dominant	0.417252	0.461133	4.26081	0.836704	protective	NA
KEGG_SNARE_INTERACTIONS_IN_VESICULAR_TRANSPORT	REACTOME_L1CAM_INTERACTIONS	rs11583530	1	171708037	VAMP4	rs11071896	15	66528912	MAP2K1	dominant	0.224674	0.261284	4.06728	0.819282	protective	NA
KEGG_SNARE_INTERACTIONS_IN_VESICULAR_TRANSPORT	REACTOME_L1CAM_INTERACTIONS	rs2286845	7	93994146	BET1	rs2293079	2	219236065	TUBA4A/TUBA4B	dominant	0.135657	0.16675	4.05213	0.784268	protective	NA
KEGG_SNARE_INTERACTIONS_IN_VESICULAR_TRANSPORT	REACTOME_L1CAM_INTERACTIONS	rs2286845	7	93994146	BET1	rs10810812	9	17586103	SH3GL2	dominant	0.358325	0.399699	4.04345	0.838683	protective	NA
KEGG_SNARE_INTERACTIONS_IN_VESICULAR_TRANSPORT	REACTOME_L1CAM_INTERACTIONS	rs11583530	1	171708037	VAMP4	rs2293079	2	219236065	TUBA4A/TUBA4B	dominant	0.108826	0.136911	3.92422	0.769822	protective	NA
KEGG_SNARE_INTERACTIONS_IN_VESICULAR_TRANSPORT	REACTOME_L1CAM_INTERACTIONS	rs4908482	1	7817428	VAMP3	rs28568406	1	158717373	SPTA1	dominant	0.351805	0.392177	3.90575	0.841188	protective	NA
KEGG_SNARE_INTERACTIONS_IN_VESICULAR_TRANSPORT	REACTOME_L1CAM_INTERACTIONS	rs1078004	2	85542588	VAMP5/VAMP8	rs28568406	1	158717373	SPTA1	dominant	0.421515	0.462387	3.80438	0.847196	protective	NA
KEGG_SNARE_INTERACTIONS_IN_VESICULAR_TRANSPORT	REACTOME_L1CAM_INTERACTIONS	rs2236359	1	227747743	SNAP47	rs2283125	9	133727220	VAV2	dominant	0.316449	0.356068	3.70382	0.837221	protective	NA
KEGG_SNARE_INTERACTIONS_IN_VESICULAR_TRANSPORT	REACTOME_L1CAM_INTERACTIONS	rs2236359	1	227747743	SNAP47	rs1201689	15	41813720	SPTBN5	dominant	0.38014	0.418756	3.58648	0.851232	protective	NA
KEGG_SNARE_INTERACTIONS_IN_VESICULAR_TRANSPORT	REACTOME_L1CAM_INTERACTIONS	rs2551799	17	9297594	STX8	rs28568406	1	158717373	SPTA1	dominant	0.37663	0.415246	3.54433	0.850819	protective	NA
KEGG_SNARE_INTERACTIONS_IN_VESICULAR_TRANSPORT	REACTOME_L1CAM_INTERACTIONS	rs2551799	17	9297594	STX8	rs62107586	19	6468320	TUBB4A	dominant	0.394433	0.434052	3.53927	0.849271	protective	NA
KEGG_SNARE_INTERACTIONS_IN_VESICULAR_TRANSPORT	REACTOME_L1CAM_INTERACTIONS	rs1078004	2	85542588	VAMP5/VAMP8	rs3018474	11	77504355	PAK1	dominant	0.450853	0.490221	3.53244	0.853761	protective	NA
KEGG_SNARE_INTERACTIONS_IN_VESICULAR_TRANSPORT	REACTOME_L1CAM_INTERACTIONS	rs11583530	1	171708037	VAMP4	rs7694725	4	113079800	ANK2	dominant	0.16324	0.193581	3.50571	0.812687	protective	NA
KEGG_SNARE_INTERACTIONS_IN_VESICULAR_TRANSPORT	REACTOME_L1CAM_INTERACTIONS	rs891203	19	17227073	USE1	rs286592	5	154996537	KIF4B	dominant	0.112588	0.138415	3.45418	0.789732	protective	NA
KEGG_SNARE_INTERACTIONS_IN_VESICULAR_TRANSPORT	REACTOME_L1CAM_INTERACTIONS	rs2286845	7	93994146	BET1	rs34789048	9	36169726	CLTA	dominant	0.0885155	0.112839	3.39938	0.763512	protective	NA
KEGG_SNARE_INTERACTIONS_IN_VESICULAR_TRANSPORT	REACTOME_L1CAM_INTERACTIONS	rs2551799	17	9297594	STX8	rs694739	11	64329761	RPS6KA4	dominant	0.359579	0.397944	3.38306	0.849461	protective	NA
KEGG_SNARE_INTERACTIONS_IN_VESICULAR_TRANSPORT	REACTOME_L1CAM_INTERACTIONS	rs2551799	17	9297594	STX8	rs353116	2	165277122	SCN2A	dominant	0.383149	0.421264	3.37237	0.853326	protective	NA
KEGG_SNARE_INTERACTIONS_IN_VESICULAR_TRANSPORT	REACTOME_L1CAM_INTERACTIONS	rs1078004	2	85542588	VAMP5/VAMP8	rs2300014	7	108297798	NRCAM	dominant	0.468656	0.50677	3.32554	0.858453	protective	NA
KEGG_SNARE_INTERACTIONS_IN_VESICULAR_TRANSPORT	REACTOME_L1CAM_INTERACTIONS	rs2236359	1	227747743	SNAP47	rs10956647	8	132190597	KCNQ3	dominant	0.313942	0.349298	3.24881	0.852461	protective	NA
KEGG_SNARE_INTERACTIONS_IN_VESICULAR_TRANSPORT	REACTOME_L1CAM_INTERACTIONS	rs2286845	7	93994146	BET1	rs1978973	3	105622370	ALCAM	dominant	0.0769809	0.0995486	3.23715	0.754393	protective	NA
KEGG_SNARE_INTERACTIONS_IN_VESICULAR_TRANSPORT	REACTOME_L1CAM_INTERACTIONS	rs1078004	2	85542588	VAMP5/VAMP8	rs805262	6	31660956	CSNK2B	dominant	0.50326	0.540622	3.21614	0.860874	protective	NA
KEGG_SNARE_INTERACTIONS_IN_VESICULAR_TRANSPORT	REACTOME_L1CAM_INTERACTIONS	rs11583530	1	171708037	VAMP4	rs10810812	9	17586103	SH3GL2	dominant	0.308676	0.344032	3.19719	0.851344	protective	NA
KEGG_SNARE_INTERACTIONS_IN_VESICULAR_TRANSPORT	REACTOME_L1CAM_INTERACTIONS	rs2236359	1	227747743	SNAP47	rs62107586	19	6468320	TUBB4A	dominant	0.408225	0.444835	3.18024	0.860927	protective	NA
KEGG_SNARE_INTERACTIONS_IN_VESICULAR_TRANSPORT	REACTOME_L1CAM_INTERACTIONS	rs1078004	2	85542588	VAMP5/VAMP8	rs62107586	19	6468320	TUBB4A	dominant	0.446339	0.48345	3.17196	0.861353	protective	NA
KEGG_SNARE_INTERACTIONS_IN_VESICULAR_TRANSPORT	REACTOME_L1CAM_INTERACTIONS	rs2286845	7	93994146	BET1	rs62107586	19	6468320	TUBB4A	dominant	0.369609	0.404965	3.11839	0.861504	protective	NA
KEGG_SNARE_INTERACTIONS_IN_VESICULAR_TRANSPORT	REACTOME_L1CAM_INTERACTIONS	rs2286845	7	93994146	BET1	rs303819	12	51821318	SCN8A	dominant	0.138164	0.165246	3.1093	0.809842	protective	NA
KEGG_SNARE_INTERACTIONS_IN_VESICULAR_TRANSPORT	REACTOME_L1CAM_INTERACTIONS	rs11583530	1	171708037	VAMP4	rs353116	2	165277122	SCN2A	dominant	0.312437	0.347793	3.10769	0.852147	protective	NA
KEGG_SNARE_INTERACTIONS_IN_VESICULAR_TRANSPORT	REACTOME_L1CAM_INTERACTIONS	rs2286845	7	93994146	BET1	rs584427	11	113233274	NCAM1	dominant	0.41675	0.45336	3.09415	0.861548	protective	NA
KEGG_SNARE_INTERACTIONS_IN_VESICULAR_TRANSPORT	REACTOME_L1CAM_INTERACTIONS	rs2286845	7	93994146	BET1	rs1201689	15	41813720	SPTBN5	dominant	0.347292	0.381896	3.05643	0.861177	protective	NA
KEGG_SNARE_INTERACTIONS_IN_VESICULAR_TRANSPORT	REACTOME_L1CAM_INTERACTIONS	rs3027232	17	8118747	VAMP2	rs2293079	2	219236065	TUBA4A/TUBA4B	dominant	0.084002	0.10657	3.03277	0.768815	protective	NA
KEGG_SNARE_INTERACTIONS_IN_VESICULAR_TRANSPORT	REACTOME_L1CAM_INTERACTIONS	rs2286845	7	93994146	BET1	rs7694725	4	113079800	ANK2	dominant	0.18656	0.215647	2.96758	0.834181	protective	NA
KEGG_SNARE_INTERACTIONS_IN_VESICULAR_TRANSPORT	REACTOME_L1CAM_INTERACTIONS	rs2551799	17	9297594	STX8	rs2293079	2	219236065	TUBA4A/TUBA4B	dominant	0.150702	0.177533	2.94594	0.822053	protective	NA
KEGG_SNARE_INTERACTIONS_IN_VESICULAR_TRANSPORT	REACTOME_L1CAM_INTERACTIONS	rs1078004	2	85542588	VAMP5/VAMP8	rs10810812	9	17586103	SH3GL2	dominant	0.433551	0.469157	2.94135	0.866016	protective	NA
KEGG_SNARE_INTERACTIONS_IN_VESICULAR_TRANSPORT	REACTOME_L1CAM_INTERACTIONS	rs25680	12	6445462	VAMP1	rs694739	11	64329761	RPS6KA4	dominant	0.214393	0.246489	2.93294	0.834251	protective	NA
KEGG_SNARE_INTERACTIONS_IN_VESICULAR_TRANSPORT	REACTOME_L1CAM_INTERACTIONS	rs10849451	12	6415513	VAMP1	rs71377306	17	47347921	ITGB3	dominant	0.0656971	0.0845035	2.91997	0.761799	protective	NA
KEGG_SNARE_INTERACTIONS_IN_VESICULAR_TRANSPORT	REACTOME_L1CAM_INTERACTIONS	rs1078004	2	85542588	VAMP5/VAMP8	rs10510181	3	149364	CHL1	dominant	0.367352	0.401956	2.88071	0.863923	protective	NA
KEGG_SNARE_INTERACTIONS_IN_VESICULAR_TRANSPORT	REACTOME_L1CAM_INTERACTIONS	rs2236359	1	227747743	SNAP47	rs353116	2	165277122	SCN2A	dominant	0.398947	0.434303	2.8764	0.864556	protective	NA
KEGG_SNARE_INTERACTIONS_IN_VESICULAR_TRANSPORT	REACTOME_L1CAM_INTERACTIONS	rs10462024	17	8148321	VAMP2	rs71377306	17	47347921	ITGB3	dominant	0.055667	0.0732197	2.82672	0.746142	protective	NA
KEGG_SNARE_INTERACTIONS_IN_VESICULAR_TRANSPORT	REACTOME_L1CAM_INTERACTIONS	rs25680	12	6445462	VAMP1	rs28568406	1	158717373	SPTA1	dominant	0.233952	0.264794	2.80709	0.84795	protective	NA
KEGG_SNARE_INTERACTIONS_IN_VESICULAR_TRANSPORT	REACTOME_L1CAM_INTERACTIONS	rs2286845	7	93994146	BET1	rs2403730	8	132079891	KCNQ3	dominant	0.314945	0.347292	2.80317	0.864039	protective	NA
KEGG_SNARE_INTERACTIONS_IN_VESICULAR_TRANSPORT	REACTOME_L1CAM_INTERACTIONS	rs4908482	1	7817428	VAMP3	rs303819	12	51821318	SCN8A	dominant	0.140923	0.165998	2.78724	0.824163	protective	NA
KEGG_SNARE_INTERACTIONS_IN_VESICULAR_TRANSPORT	REACTOME_L1CAM_INTERACTIONS	rs4908482	1	7817428	VAMP3	rs3018474	11	77504355	PAK1	dominant	0.377382	0.410732	2.78223	0.869588	protective	NA
KEGG_SNARE_INTERACTIONS_IN_VESICULAR_TRANSPORT	REACTOME_L1CAM_INTERACTIONS	rs25680	12	6445462	VAMP1	rs10810812	9	17586103	SH3GL2	dominant	0.239468	0.270311	2.74895	0.849973	protective	NA
KEGG_SNARE_INTERACTIONS_IN_VESICULAR_TRANSPORT	REACTOME_L1CAM_INTERACTIONS	rs4908482	1	7817428	VAMP3	rs10810812	9	17586103	SH3GL2	dominant	0.359829	0.39343	2.74739	0.866591	protective	NA
KEGG_SNARE_INTERACTIONS_IN_VESICULAR_TRANSPORT	REACTOME_L1CAM_INTERACTIONS	rs2236359	1	227747743	SNAP47	rs1531545	5	52897456	ITGA1	dominant	0.46665	0.500251	2.74601	0.874064	protective	NA
KEGG_SNARE_INTERACTIONS_IN_VESICULAR_TRANSPORT	REACTOME_L1CAM_INTERACTIONS	rs11583530	1	171708037	VAMP4	rs10510181	3	149364	CHL1	dominant	0.264794	0.295386	2.74156	0.859134	protective	NA
KEGG_SNARE_INTERACTIONS_IN_VESICULAR_TRANSPORT	REACTOME_L1CAM_INTERACTIONS	rs2236359	1	227747743	SNAP47	rs10510181	3	149364	CHL1	dominant	0.344534	0.37663	2.7082	0.869986	protective	NA
KEGG_SNARE_INTERACTIONS_IN_VESICULAR_TRANSPORT	REACTOME_L1CAM_INTERACTIONS	rs25680	12	6445462	VAMP1	rs1011731	1	172377408	DNM3	dominant	0.250502	0.280592	2.69375	0.85692	protective	NA
KEGG_SNARE_INTERACTIONS_IN_VESICULAR_TRANSPORT	REACTOME_L1CAM_INTERACTIONS	rs1078004	2	85542588	VAMP5/VAMP8	rs584427	11	113233274	NCAM1	dominant	0.499749	0.533852	2.69256	0.872305	protective	NA
KEGG_SNARE_INTERACTIONS_IN_VESICULAR_TRANSPORT	REACTOME_L1CAM_INTERACTIONS	rs25680	12	6445462	VAMP1	rs2283125	9	133727220	VAV2	dominant	0.192578	0.220662	2.68958	0.842372	protective	NA
KEGG_SNARE_INTERACTIONS_IN_VESICULAR_TRANSPORT	REACTOME_L1CAM_INTERACTIONS	rs10902112	11	244106	BET1L	rs694739	11	64329761	RPS6KA4	dominant	0.265797	0.298395	2.68887	0.851208	protective	NA
KEGG_SNARE_INTERACTIONS_IN_VESICULAR_TRANSPORT	REACTOME_L1CAM_INTERACTIONS	rs3757840	7	44191617	YKT6	rs10956647	8	132190597	KCNQ3	dominant	0.350552	0.382397	2.68864	0.87177	protective	NA
KEGG_SNARE_INTERACTIONS_IN_VESICULAR_TRANSPORT	REACTOME_L1CAM_INTERACTIONS	rs3757840	7	44191617	YKT6	rs10810812	9	17586103	SH3GL2	dominant	0.448345	0.482197	2.67151	0.872741	protective	NA
KEGG_SNARE_INTERACTIONS_IN_VESICULAR_TRANSPORT	REACTOME_L1CAM_INTERACTIONS	rs2286845	7	93994146	BET1	rs286592	5	154996537	KIF4B	dominant	0.314945	0.346289	2.6484	0.867873	protective	NA
KEGG_SNARE_INTERACTIONS_IN_VESICULAR_TRANSPORT	REACTOME_L1CAM_INTERACTIONS	rs2236359	1	227747743	SNAP47	rs1978973	3	105622370	ALCAM	dominant	0.0917753	0.112839	2.63541	0.794471	protective	NA
KEGG_SNARE_INTERACTIONS_IN_VESICULAR_TRANSPORT	REACTOME_L1CAM_INTERACTIONS	rs3757840	7	44191617	YKT6	rs3018474	11	77504355	PAK1	dominant	0.467904	0.500752	2.62132	0.876717	protective	NA
KEGG_SNARE_INTERACTIONS_IN_VESICULAR_TRANSPORT	REACTOME_L1CAM_INTERACTIONS	rs1078004	2	85542588	VAMP5/VAMP8	rs3827496	3	115622053	GAP43	dominant	0.509278	0.542879	2.61734	0.873872	protective	NA
KEGG_SNARE_INTERACTIONS_IN_VESICULAR_TRANSPORT	REACTOME_L1CAM_INTERACTIONS	rs1078004	2	85542588	VAMP5/VAMP8	rs2293079	2	219236065	TUBA4A/TUBA4B	dominant	0.16324	0.190321	2.61136	0.829948	protective	NA
KEGG_SNARE_INTERACTIONS_IN_VESICULAR_TRANSPORT	REACTOME_L1CAM_INTERACTIONS	rs2236359	1	227747743	SNAP47	rs11071896	15	66528912	MAP2K1	dominant	0.290622	0.320712	2.60784	0.867739	protective	NA
KEGG_SNARE_INTERACTIONS_IN_VESICULAR_TRANSPORT	REACTOME_L1CAM_INTERACTIONS	rs25680	12	6445462	VAMP1	rs2228479	16	89919532	TUBB3	dominant	0.0524072	0.0704614	2.6051	0.729601	protective	NA
KEGG_SNARE_INTERACTIONS_IN_VESICULAR_TRANSPORT	REACTOME_L1CAM_INTERACTIONS	rs3757840	7	44191617	YKT6	rs62107586	19	6468320	TUBB4A	dominant	0.461635	0.493731	2.60028	0.87925	protective	NA
KEGG_SNARE_INTERACTIONS_IN_VESICULAR_TRANSPORT	REACTOME_L1CAM_INTERACTIONS	rs1078004	2	85542588	VAMP5/VAMP8	rs11071896	15	66528912	MAP2K1	dominant	0.320461	0.352558	2.59854	0.866029	protective	NA
KEGG_SNARE_INTERACTIONS_IN_VESICULAR_TRANSPORT	REACTOME_L1CAM_INTERACTIONS	rs6026468	20	58715291	STX16	rs694739	11	64329761	RPS6KA4	dominant	0.368857	0.402959	2.58023	0.86591	protective	NA
KEGG_SNARE_INTERACTIONS_IN_VESICULAR_TRANSPORT	REACTOME_L1CAM_INTERACTIONS	rs1078004	2	85542588	VAMP5/VAMP8	rs9853984	3	38608689	SCN5A	dominant	0.445085	0.478435	2.57754	0.874383	protective	NA
KEGG_SNARE_INTERACTIONS_IN_VESICULAR_TRANSPORT	REACTOME_L1CAM_INTERACTIONS	rs1195569	12	130740926	STX2	rs71377306	17	47347921	ITGB3	dominant	0.0674524	0.0855065	2.56941	0.773584	protective	NA
KEGG_SNARE_INTERACTIONS_IN_VESICULAR_TRANSPORT	REACTOME_L1CAM_INTERACTIONS	rs1078004	2	85542588	VAMP5/VAMP8	rs286592	5	154996537	KIF4B	dominant	0.385406	0.418255	2.56521	0.872213	protective	NA
KEGG_SNARE_INTERACTIONS_IN_VESICULAR_TRANSPORT	REACTOME_L1CAM_INTERACTIONS	rs10849451	12	6415513	VAMP1	rs1978973	3	105622370	ALCAM	dominant	0.104564	0.125376	2.56371	0.814616	protective	NA
KEGG_SNARE_INTERACTIONS_IN_VESICULAR_TRANSPORT	REACTOME_L1CAM_INTERACTIONS	rs2551799	17	9297594	STX8	rs7694725	4	113079800	ANK2	dominant	0.205115	0.232447	2.55861	0.852075	protective	NA
KEGG_SNARE_INTERACTIONS_IN_VESICULAR_TRANSPORT	REACTOME_L1CAM_INTERACTIONS	rs11583530	1	171708037	VAMP4	rs314253	17	7188331	DLG4	dominant	0.277081	0.30667	2.55743	0.866535	protective	NA
KEGG_SNARE_INTERACTIONS_IN_VESICULAR_TRANSPORT	REACTOME_L1CAM_INTERACTIONS	rs2236359	1	227747743	SNAP47	rs10810812	9	17586103	SH3GL2	dominant	0.402207	0.435055	2.55175	0.873695	protective	NA
KEGG_SNARE_INTERACTIONS_IN_VESICULAR_TRANSPORT	REACTOME_L1CAM_INTERACTIONS	rs25680	12	6445462	VAMP1	rs62107586	19	6468320	TUBB4A	dominant	0.244233	0.27332	2.54679	0.859187	protective	NA
KEGG_SNARE_INTERACTIONS_IN_VESICULAR_TRANSPORT	REACTOME_L1CAM_INTERACTIONS	rs2551799	17	9297594	STX8	rs62244081	3	38771518	SCN10A	dominant	0.27006	0.299147	2.54229	0.866792	protective	NA
KEGG_SNARE_INTERACTIONS_IN_VESICULAR_TRANSPORT	REACTOME_L1CAM_INTERACTIONS	rs9676419	19	17256626	USE1	rs71377306	17	47347921	ITGB3	dominant	0.0330993	0.0471414	2.5412	0.691931	protective	NA
KEGG_SNARE_INTERACTIONS_IN_VESICULAR_TRANSPORT	REACTOME_L1CAM_INTERACTIONS	rs3757840	7	44191617	YKT6	rs7694725	4	113079800	ANK2	dominant	0.232698	0.260782	2.53821	0.859648	protective	NA
KEGG_SNARE_INTERACTIONS_IN_VESICULAR_TRANSPORT	REACTOME_L1CAM_INTERACTIONS	rs1078004	2	85542588	VAMP5/VAMP8	rs1531545	5	52897456	ITGA1	dominant	0.507523	0.540622	2.53607	0.875681	protective	NA
KEGG_SNARE_INTERACTIONS_IN_VESICULAR_TRANSPORT	REACTOME_L1CAM_INTERACTIONS	rs2286845	7	93994146	BET1	rs20559	1	183130425	LAMC1	dominant	0.0529087	0.0704614	2.53466	0.736973	protective	NA
KEGG_SNARE_INTERACTIONS_IN_VESICULAR_TRANSPORT	REACTOME_L1CAM_INTERACTIONS	rs1078004	2	85542588	VAMP5/VAMP8	rs177389	14	73260801	NUMB	dominant	0.492728	0.525827	2.53049	0.875911	protective	NA
KEGG_SNARE_INTERACTIONS_IN_VESICULAR_TRANSPORT	REACTOME_L1CAM_INTERACTIONS	rs11583530	1	171708037	VAMP4	rs11888208	2	166456941	SCN7A	dominant	0.134403	0.158225	2.52296	0.826068	protective	NA
KEGG_SNARE_INTERACTIONS_IN_VESICULAR_TRANSPORT	REACTOME_L1CAM_INTERACTIONS	rs10100935	8	142344359	TSNARE1	rs2293079	2	219236065	TUBA4A/TUBA4B	dominant	0.129388	0.15321	2.52037	0.82141	protective	NA
KEGG_SNARE_INTERACTIONS_IN_VESICULAR_TRANSPORT	REACTOME_L1CAM_INTERACTIONS	rs2551799	17	9297594	STX8	rs10510181	3	149364	CHL1	dominant	0.330742	0.361334	2.51616	0.873497	protective	NA
KEGG_SNARE_INTERACTIONS_IN_VESICULAR_TRANSPORT	REACTOME_L1CAM_INTERACTIONS	rs2286845	7	93994146	BET1	rs11071896	15	66528912	MAP2K1	dominant	0.266048	0.295386	2.5112	0.864677	protective	NA
KEGG_SNARE_INTERACTIONS_IN_VESICULAR_TRANSPORT	REACTOME_L1CAM_INTERACTIONS	rs10462024	17	8148321	VAMP2	rs11071896	15	66528912	MAP2K1	dominant	0.288867	0.319458	2.49144	0.86534	protective	NA
KEGG_SNARE_INTERACTIONS_IN_VESICULAR_TRANSPORT	REACTOME_L1CAM_INTERACTIONS	rs11583530	1	171708037	VAMP4	rs62107586	19	6468320	TUBB4A	dominant	0.32347	0.353561	2.48881	0.874202	protective	NA
KEGG_SNARE_INTERACTIONS_IN_VESICULAR_TRANSPORT	REACTOME_L1CAM_INTERACTIONS	rs25680	12	6445462	VAMP1	rs1531545	5	52897456	ITGA1	dominant	0.280843	0.310431	2.47893	0.867463	protective	NA
KEGG_SNARE_INTERACTIONS_IN_VESICULAR_TRANSPORT	REACTOME_L1CAM_INTERACTIONS	rs25680	12	6445462	VAMP1	rs6699312	1	171836182	DNM3	dominant	0.270812	0.30015	2.47283	0.865954	protective	NA
KEGG_SNARE_INTERACTIONS_IN_VESICULAR_TRANSPORT	REACTOME_L1CAM_INTERACTIONS	rs3736946	10	112409518	VTI1A	rs71377306	17	47347921	ITGB3	dominant	0.0157974	0.0265797	2.46912	0.587828	protective	NA
KEGG_SNARE_INTERACTIONS_IN_VESICULAR_TRANSPORT	REACTOME_L1CAM_INTERACTIONS	rs25680	12	6445462	VAMP1	rs2303361	7	6409865	RAC1	dominant	0.141174	0.165747	2.46739	0.827369	protective	NA
KEGG_SNARE_INTERACTIONS_IN_VESICULAR_TRANSPORT	REACTOME_L1CAM_INTERACTIONS	rs2286845	7	93994146	BET1	rs6066384	20	37443196	SRC	dominant	0.402207	0.434052	2.44921	0.877269	protective	NA
KEGG_SNARE_INTERACTIONS_IN_VESICULAR_TRANSPORT	REACTOME_L1CAM_INTERACTIONS	rs1078004	2	85542588	VAMP5/VAMP8	rs6764363	3	270666	CHL1	dominant	0.413741	0.446088	2.44679	0.876313	protective	NA
KEGG_SNARE_INTERACTIONS_IN_VESICULAR_TRANSPORT	REACTOME_L1CAM_INTERACTIONS	rs2286845	7	93994146	BET1	rs1531545	5	52897456	ITGA1	dominant	0.42327	0.454363	2.42397	0.881344	protective	NA
KEGG_SNARE_INTERACTIONS_IN_VESICULAR_TRANSPORT	REACTOME_L1CAM_INTERACTIONS	rs2236359	1	227747743	SNAP47	rs314253	17	7188331	DLG4	dominant	0.347793	0.377633	2.41455	0.878846	protective	NA
KEGG_SNARE_INTERACTIONS_IN_VESICULAR_TRANSPORT	REACTOME_L1CAM_INTERACTIONS	rs2236359	1	227747743	SNAP47	rs6598858	1	26583274	RPS6KA1	dominant	0.439819	0.470662	2.41178	0.88302	protective	NA
KEGG_SNARE_INTERACTIONS_IN_VESICULAR_TRANSPORT	REACTOME_L1CAM_INTERACTIONS	rs10849451	12	6415513	VAMP1	rs10510181	3	149364	CHL1	dominant	0.391675	0.422768	2.40806	0.879099	protective	NA
KEGG_SNARE_INTERACTIONS_IN_VESICULAR_TRANSPORT	REACTOME_L1CAM_INTERACTIONS	rs2286845	7	93994146	BET1	rs10510181	3	149364	CHL1	dominant	0.310431	0.34002	2.3932	0.873804	protective	NA
KEGG_SNARE_INTERACTIONS_IN_VESICULAR_TRANSPORT	REACTOME_L1CAM_INTERACTIONS	rs2286845	7	93994146	BET1	rs12357206	10	60030625	ANK3	dominant	0.42001	0.450853	2.38992	0.882051	protective	NA
KEGG_SNARE_INTERACTIONS_IN_VESICULAR_TRANSPORT	REACTOME_L1CAM_INTERACTIONS	rs10849451	12	6415513	VAMP1	rs694739	11	64329761	RPS6KA4	dominant	0.42327	0.456871	2.37981	0.872478	protective	NA
KEGG_SNARE_INTERACTIONS_IN_VESICULAR_TRANSPORT	REACTOME_L1CAM_INTERACTIONS	rs891203	19	17227073	USE1	rs303819	12	51821318	SCN8A	dominant	0.0488967	0.0644433	2.37797	0.746352	protective	NA
KEGG_SNARE_INTERACTIONS_IN_VESICULAR_TRANSPORT	REACTOME_L1CAM_INTERACTIONS	rs2286845	7	93994146	BET1	rs17346452	1	172084147	DNM3	dominant	0.270311	0.298897	2.37358	0.868934	protective	NA
KEGG_SNARE_INTERACTIONS_IN_VESICULAR_TRANSPORT	REACTOME_L1CAM_INTERACTIONS	rs11583530	1	171708037	VAMP4	rs694739	11	64329761	RPS6KA4	dominant	0.291876	0.32347	2.37279	0.862066	protective	NA
KEGG_SNARE_INTERACTIONS_IN_VESICULAR_TRANSPORT	REACTOME_L1CAM_INTERACTIONS	rs2286845	7	93994146	BET1	rs10956647	8	132190597	KCNQ3	dominant	0.284353	0.31319	2.36069	0.871342	protective	NA
KEGG_SNARE_INTERACTIONS_IN_VESICULAR_TRANSPORT	REACTOME_L1CAM_INTERACTIONS	rs3757840	7	44191617	YKT6	rs1201689	15	41813720	SPTBN5	dominant	0.432548	0.463139	2.35269	0.883597	protective	NA
KEGG_SNARE_INTERACTIONS_IN_VESICULAR_TRANSPORT	REACTOME_L1CAM_INTERACTIONS	rs25680	12	6445462	VAMP1	rs71377306	17	47347921	ITGB3	dominant	0.0305918	0.0448847	2.3486	0.671515	protective	NA
KEGG_SNARE_INTERACTIONS_IN_VESICULAR_TRANSPORT	REACTOME_L1CAM_INTERACTIONS	rs3757840	7	44191617	YKT6	rs28568406	1	158717373	SPTA1	dominant	0.435306	0.466901	2.34831	0.880167	protective	NA
KEGG_SNARE_INTERACTIONS_IN_VESICULAR_TRANSPORT	REACTOME_L1CAM_INTERACTIONS	rs891203	19	17227073	USE1	rs1531545	5	52897456	ITGA1	dominant	0.152959	0.175777	2.34465	0.846744	protective	NA
KEGG_SNARE_INTERACTIONS_IN_VESICULAR_TRANSPORT	REACTOME_L1CAM_INTERACTIONS	rs2286845	7	93994146	BET1	rs11888208	2	166456941	SCN7A	dominant	0.14995	0.174022	2.34439	0.83727	protective	NA
KEGG_SNARE_INTERACTIONS_IN_VESICULAR_TRANSPORT	REACTOME_L1CAM_INTERACTIONS	rs1078004	2	85542588	VAMP5/VAMP8	rs2721876	8	132515828	KCNQ3	dominant	0.35657	0.387663	2.34196	0.875345	protective	NA
KEGG_SNARE_INTERACTIONS_IN_VESICULAR_TRANSPORT	REACTOME_L1CAM_INTERACTIONS	rs891203	19	17227073	USE1	rs2283125	9	133727220	VAV2	dominant	0.108826	0.129137	2.33957	0.823512	protective	NA
KEGG_SNARE_INTERACTIONS_IN_VESICULAR_TRANSPORT	REACTOME_L1CAM_INTERACTIONS	rs2532500	12	6453644	VAMP1	rs71377306	17	47347921	ITGB3	dominant	0.0501505	0.0656971	2.33788	0.750865	protective	NA
KEGG_SNARE_INTERACTIONS_IN_VESICULAR_TRANSPORT	REACTOME_L1CAM_INTERACTIONS	rs3795504	1	180936312	STX6	rs12205572	6	166365976	RPS6KA2	dominant	0.0697091	0.0885155	2.33684	0.771615	protective	NA
KEGG_SNARE_INTERACTIONS_IN_VESICULAR_TRANSPORT	REACTOME_L1CAM_INTERACTIONS	rs6026468	20	58715291	STX16	rs353116	2	165277122	SCN2A	dominant	0.395436	0.427533	2.33321	0.875822	protective	NA
KEGG_SNARE_INTERACTIONS_IN_VESICULAR_TRANSPORT	REACTOME_L1CAM_INTERACTIONS	rs3757840	7	44191617	YKT6	rs20559	1	183130425	LAMC1	dominant	0.0694584	0.087011	2.32947	0.783213	protective	NA
KEGG_SNARE_INTERACTIONS_IN_VESICULAR_TRANSPORT	REACTOME_L1CAM_INTERACTIONS	rs11583530	1	171708037	VAMP4	rs41315701	1	145872994	ITGA10	dominant	0.173771	0.199599	2.32655	0.843388	protective	NA
KEGG_SNARE_INTERACTIONS_IN_VESICULAR_TRANSPORT	REACTOME_L1CAM_INTERACTIONS	rs1078004	2	85542588	VAMP5/VAMP8	rs2283125	9	133727220	VAV2	dominant	0.349799	0.380642	2.31693	0.875381	protective	NA
KEGG_SNARE_INTERACTIONS_IN_VESICULAR_TRANSPORT	REACTOME_L1CAM_INTERACTIONS	rs3757840	7	44191617	YKT6	rs353116	2	165277122	SCN2A	dominant	0.448847	0.481194	2.31344	0.878033	protective	NA
KEGG_SNARE_INTERACTIONS_IN_VESICULAR_TRANSPORT	REACTOME_L1CAM_INTERACTIONS	rs10849451	12	6415513	VAMP1	rs1201689	15	41813720	SPTBN5	dominant	0.439067	0.469408	2.31175	0.884769	protective	NA
KEGG_SNARE_INTERACTIONS_IN_VESICULAR_TRANSPORT	REACTOME_L1CAM_INTERACTIONS	rs1078004	2	85542588	VAMP5/VAMP8	rs8106478	19	46873129	AP2S1	dominant	0.433801	0.465396	2.3102	0.880099	protective	NA
KEGG_SNARE_INTERACTIONS_IN_VESICULAR_TRANSPORT	REACTOME_L1CAM_INTERACTIONS	rs4908482	1	7817428	VAMP3	rs314253	17	7188331	DLG4	dominant	0.316199	0.344534	2.303	0.879729	protective	NA
KEGG_SNARE_INTERACTIONS_IN_VESICULAR_TRANSPORT	REACTOME_L1CAM_INTERACTIONS	rs25680	12	6445462	VAMP1	rs1201689	15	41813720	SPTBN5	dominant	0.230943	0.258275	2.29921	0.862396	protective	NA
KEGG_SNARE_INTERACTIONS_IN_VESICULAR_TRANSPORT	REACTOME_L1CAM_INTERACTIONS	rs6026468	20	58715291	STX16	rs28568406	1	158717373	SPTA1	dominant	0.382397	0.41324	2.28898	0.879152	protective	NA
KEGG_SNARE_INTERACTIONS_IN_VESICULAR_TRANSPORT	REACTOME_L1CAM_INTERACTIONS	rs3757840	7	44191617	YKT6	rs11604757	11	1029320	AP2A2	dominant	0.152207	0.175025	2.28203	0.846221	protective	NA
KEGG_SNARE_INTERACTIONS_IN_VESICULAR_TRANSPORT	REACTOME_L1CAM_INTERACTIONS	rs3795504	1	180936312	STX6	rs353116	2	165277122	SCN2A	dominant	0.436309	0.468405	2.2814	0.87844	protective	NA
KEGG_SNARE_INTERACTIONS_IN_VESICULAR_TRANSPORT	REACTOME_L1CAM_INTERACTIONS	rs2551799	17	9297594	STX8	rs2300014	7	108297798	NRCAM	dominant	0.428034	0.457623	2.27519	0.886956	protective	NA
KEGG_SNARE_INTERACTIONS_IN_VESICULAR_TRANSPORT	REACTOME_L1CAM_INTERACTIONS	rs11583530	1	171708037	VAMP4	rs11604757	11	1029320	AP2A2	dominant	0.104814	0.125627	2.27118	0.814934	protective	NA
KEGG_SNARE_INTERACTIONS_IN_VESICULAR_TRANSPORT	REACTOME_L1CAM_INTERACTIONS	rs2236359	1	227747743	SNAP47	rs34789048	9	36169726	CLTA	dominant	0.0960381	0.115848	2.26893	0.810838	protective	NA
KEGG_SNARE_INTERACTIONS_IN_VESICULAR_TRANSPORT	REACTOME_L1CAM_INTERACTIONS	rs3757840	7	44191617	YKT6	rs2293079	2	219236065	TUBA4A/TUBA4B	dominant	0.170261	0.194835	2.25952	0.847993	protective	NA
KEGG_SNARE_INTERACTIONS_IN_VESICULAR_TRANSPORT	REACTOME_L1CAM_INTERACTIONS	rs1078004	2	85542588	VAMP5/VAMP8	rs17519184	18	6986715	LAMA1	dominant	0.406971	0.438064	2.25845	0.880311	protective	NA
KEGG_SNARE_INTERACTIONS_IN_VESICULAR_TRANSPORT	REACTOME_L1CAM_INTERACTIONS	rs718097	17	9212088	STX8	rs1978973	3	105622370	ALCAM	dominant	0.107322	0.127131	2.23299	0.825448	protective	NA
KEGG_SNARE_INTERACTIONS_IN_VESICULAR_TRANSPORT	REACTOME_L1CAM_INTERACTIONS	rs891203	19	17227073	USE1	rs177389	14	73260801	NUMB	dominant	0.143681	0.165246	2.23285	0.847603	protective	NA
KEGG_SNARE_INTERACTIONS_IN_VESICULAR_TRANSPORT	REACTOME_L1CAM_INTERACTIONS	rs11583530	1	171708037	VAMP4	rs3827496	3	115622053	GAP43	dominant	0.369107	0.398947	2.22559	0.881445	protective	NA
KEGG_SNARE_INTERACTIONS_IN_VESICULAR_TRANSPORT	REACTOME_L1CAM_INTERACTIONS	rs2286845	7	93994146	BET1	rs2283125	9	133727220	VAV2	dominant	0.293882	0.321966	2.21276	0.876469	protective	NA
KEGG_SNARE_INTERACTIONS_IN_VESICULAR_TRANSPORT	REACTOME_L1CAM_INTERACTIONS	rs891203	19	17227073	USE1	rs8106478	19	46873129	AP2S1	dominant	0.129639	0.150451	2.21007	0.841062	protective	NA
KEGG_SNARE_INTERACTIONS_IN_VESICULAR_TRANSPORT	REACTOME_L1CAM_INTERACTIONS	rs1078004	2	85542588	VAMP5/VAMP8	rs11888208	2	166456941	SCN7A	dominant	0.187813	0.213892	2.19356	0.849883	protective	NA
KEGG_SNARE_INTERACTIONS_IN_VESICULAR_TRANSPORT	REACTOME_L1CAM_INTERACTIONS	rs2551799	17	9297594	STX8	rs1201689	15	41813720	SPTBN5	dominant	0.375627	0.404714	2.19261	0.884891	protective	NA
KEGG_SNARE_INTERACTIONS_IN_VESICULAR_TRANSPORT	REACTOME_L1CAM_INTERACTIONS	rs11583530	1	171708037	VAMP4	rs2300014	7	108297798	NRCAM	dominant	0.346038	0.374373	2.18534	0.884265	protective	NA
KEGG_SNARE_INTERACTIONS_IN_VESICULAR_TRANSPORT	REACTOME_L1CAM_INTERACTIONS	rs2236359	1	227747743	SNAP47	rs2403730	8	132079891	KCNQ3	dominant	0.344032	0.372116	2.18079	0.884946	protective	NA
KEGG_SNARE_INTERACTIONS_IN_VESICULAR_TRANSPORT	REACTOME_L1CAM_INTERACTIONS	rs7024419	9	99862214	STX17	rs1978973	3	105622370	ALCAM	dominant	0.0937813	0.113591	2.17882	0.80756	protective	NA
KEGG_SNARE_INTERACTIONS_IN_VESICULAR_TRANSPORT	REACTOME_L1CAM_INTERACTIONS	rs10521157	17	9433053	STX8	rs2283125	9	133727220	VAV2	dominant	0.208877	0.2332	2.16576	0.868161	protective	NA
KEGG_SNARE_INTERACTIONS_IN_VESICULAR_TRANSPORT	REACTOME_L1CAM_INTERACTIONS	rs4908482	1	7817428	VAMP3	rs1201689	15	41813720	SPTBN5	dominant	0.350802	0.379388	2.16083	0.883938	protective	NA
KEGG_SNARE_INTERACTIONS_IN_VESICULAR_TRANSPORT	REACTOME_L1CAM_INTERACTIONS	rs2551799	17	9297594	STX8	rs3922844	3	38582762	SCN5A	dominant	0.32673	0.354313	2.15472	0.884372	protective	NA
KEGG_SNARE_INTERACTIONS_IN_VESICULAR_TRANSPORT	REACTOME_L1CAM_INTERACTIONS	rs11583530	1	171708037	VAMP4	rs34162626	6	13611846	RANBP9	dominant	0.0531595	0.0692076	2.15438	0.755097	protective	NA
KEGG_SNARE_INTERACTIONS_IN_VESICULAR_TRANSPORT	REACTOME_L1CAM_INTERACTIONS	rs3795504	1	180936312	STX6	rs694739	11	64329761	RPS6KA4	dominant	0.405968	0.438064	2.13108	0.876659	protective	NA
KEGG_SNARE_INTERACTIONS_IN_VESICULAR_TRANSPORT	REACTOME_L1CAM_INTERACTIONS	rs3757840	7	44191617	YKT6	rs2403730	8	132079891	KCNQ3	dominant	0.385908	0.413741	2.11892	0.890452	protective	NA
KEGG_SNARE_INTERACTIONS_IN_VESICULAR_TRANSPORT	REACTOME_L1CAM_INTERACTIONS	rs891203	19	17227073	USE1	rs2300014	7	108297798	NRCAM	dominant	0.13992	0.160732	2.11889	0.84945	protective	NA
KEGG_SNARE_INTERACTIONS_IN_VESICULAR_TRANSPORT	REACTOME_L1CAM_INTERACTIONS	rs4908482	1	7817428	VAMP3	rs746463	11	110125219	RDX	dominant	0.30015	0.327984	2.10899	0.878742	protective	NA
KEGG_SNARE_INTERACTIONS_IN_VESICULAR_TRANSPORT	REACTOME_L1CAM_INTERACTIONS	rs891203	19	17227073	USE1	rs694739	11	64329761	RPS6KA4	dominant	0.118355	0.142177	2.10898	0.809959	protective	NA
KEGG_SNARE_INTERACTIONS_IN_VESICULAR_TRANSPORT	REACTOME_L1CAM_INTERACTIONS	rs2532500	12	6453644	VAMP1	rs3816533	15	41841899	SPTBN5	dominant	0.131896	0.153711	2.10893	0.836512	protective	NA
KEGG_SNARE_INTERACTIONS_IN_VESICULAR_TRANSPORT	REACTOME_L1CAM_INTERACTIONS	rs2236359	1	227747743	SNAP47	rs584427	11	113233274	NCAM1	dominant	0.465396	0.493731	2.10625	0.89265	protective	NA
KEGG_SNARE_INTERACTIONS_IN_VESICULAR_TRANSPORT	REACTOME_L1CAM_INTERACTIONS	rs2286845	7	93994146	BET1	rs9853984	3	38608689	SCN5A	dominant	0.378385	0.406971	2.10547	0.887004	protective	NA
KEGG_SNARE_INTERACTIONS_IN_VESICULAR_TRANSPORT	REACTOME_L1CAM_INTERACTIONS	rs2286845	7	93994146	BET1	rs3018474	11	77504355	PAK1	dominant	0.3834	0.411986	2.09901	0.887471	protective	NA
KEGG_SNARE_INTERACTIONS_IN_VESICULAR_TRANSPORT	REACTOME_L1CAM_INTERACTIONS	rs9676419	19	17256626	USE1	rs694739	11	64329761	RPS6KA4	dominant	0.22342	0.251755	2.09777	0.85507	protective	NA
KEGG_SNARE_INTERACTIONS_IN_VESICULAR_TRANSPORT	REACTOME_L1CAM_INTERACTIONS	rs10100935	8	142344359	TSNARE1	rs28568406	1	158717373	SPTA1	dominant	0.339519	0.368606	2.09391	0.880524	protective	NA
KEGG_SNARE_INTERACTIONS_IN_VESICULAR_TRANSPORT	REACTOME_L1CAM_INTERACTIONS	rs1078004	2	85542588	VAMP5/VAMP8	rs16851669	2	166149820	SCN1A/SCN9A	dominant	0.414243	0.444333	2.09373	0.884389	protective	NA
KEGG_SNARE_INTERACTIONS_IN_VESICULAR_TRANSPORT	REACTOME_L1CAM_INTERACTIONS	rs2236359	1	227747743	SNAP47	rs286592	5	154996537	KIF4B	dominant	0.355817	0.3834	2.09205	0.88832	protective	NA
KEGG_SNARE_INTERACTIONS_IN_VESICULAR_TRANSPORT	REACTOME_L1CAM_INTERACTIONS	rs1545620	19	17192965	USE1	rs1978973	3	105622370	ALCAM	dominant	0.0915246	0.109579	2.08765	0.818642	protective	NA
KEGG_SNARE_INTERACTIONS_IN_VESICULAR_TRANSPORT	REACTOME_L1CAM_INTERACTIONS	rs7024419	9	99862214	STX17	rs34789048	9	36169726	CLTA	dominant	0.0905216	0.109829	2.08611	0.806703	protective	NA
KEGG_SNARE_INTERACTIONS_IN_VESICULAR_TRANSPORT	REACTOME_L1CAM_INTERACTIONS	rs11167136	8	142229454	TSNARE1	rs20559	1	183130425	LAMC1	dominant	0.0639418	0.0804915	2.06148	0.780348	protective	NA
KEGG_SNARE_INTERACTIONS_IN_VESICULAR_TRANSPORT	REACTOME_L1CAM_INTERACTIONS	rs25680	12	6445462	VAMP1	rs3922844	3	38582762	SCN5A	dominant	0.200853	0.225928	2.05546	0.861117	protective	NA
KEGG_SNARE_INTERACTIONS_IN_VESICULAR_TRANSPORT	REACTOME_L1CAM_INTERACTIONS	rs1078004	2	85542588	VAMP5/VAMP8	rs6598858	1	26583274	RPS6KA1	dominant	0.48345	0.513541	2.05267	0.886567	protective	NA
KEGG_SNARE_INTERACTIONS_IN_VESICULAR_TRANSPORT	REACTOME_L1CAM_INTERACTIONS	rs2551799	17	9297594	STX8	rs12357206	10	60030625	ANK3	dominant	0.451354	0.479188	2.05225	0.894131	protective	NA
KEGG_SNARE_INTERACTIONS_IN_VESICULAR_TRANSPORT	REACTOME_L1CAM_INTERACTIONS	rs10902112	11	244106	BET1L	rs28568406	1	158717373	SPTA1	dominant	0.273821	0.301404	2.04445	0.873978	protective	NA
KEGG_SNARE_INTERACTIONS_IN_VESICULAR_TRANSPORT	REACTOME_L1CAM_INTERACTIONS	rs1128349	7	73683324	STX1A	rs1201689	15	41813720	SPTBN5	dominant	0.407472	0.43681	2.04387	0.886648	protective	NA
KEGG_SNARE_INTERACTIONS_IN_VESICULAR_TRANSPORT	REACTOME_L1CAM_INTERACTIONS	rs2551799	17	9297594	STX8	rs3018474	11	77504355	PAK1	dominant	0.409478	0.437061	2.03783	0.893129	protective	NA
KEGG_SNARE_INTERACTIONS_IN_VESICULAR_TRANSPORT	REACTOME_L1CAM_INTERACTIONS	rs891203	19	17227073	USE1	rs10510181	3	149364	CHL1	dominant	0.111083	0.131394	2.03228	0.826103	protective	NA
KEGG_SNARE_INTERACTIONS_IN_VESICULAR_TRANSPORT	REACTOME_L1CAM_INTERACTIONS	rs2236359	1	227747743	SNAP47	rs11009235	10	33132620	NRP1	dominant	0.317452	0.344032	2.02991	0.886807	protective	NA
KEGG_SNARE_INTERACTIONS_IN_VESICULAR_TRANSPORT	REACTOME_L1CAM_INTERACTIONS	rs10521157	17	9433053	STX8	rs62244081	3	38771518	SCN10A	dominant	0.179789	0.202106	2.02921	0.865374	protective	NA
KEGG_SNARE_INTERACTIONS_IN_VESICULAR_TRANSPORT	REACTOME_L1CAM_INTERACTIONS	rs3027232	17	8118747	VAMP2	rs10810812	9	17586103	SH3GL2	dominant	0.231194	0.257773	2.02798	0.865879	protective	NA
KEGG_SNARE_INTERACTIONS_IN_VESICULAR_TRANSPORT	REACTOME_L1CAM_INTERACTIONS	rs2279008	19	17172493	USE1	rs353116	2	165277122	SCN2A	dominant	0.262788	0.290873	2.02216	0.869031	protective	NA
KEGG_SNARE_INTERACTIONS_IN_VESICULAR_TRANSPORT	REACTOME_L1CAM_INTERACTIONS	rs25680	12	6445462	VAMP1	rs177389	14	73260801	NUMB	dominant	0.274323	0.301153	2.01987	0.877229	protective	NA
KEGG_SNARE_INTERACTIONS_IN_VESICULAR_TRANSPORT	REACTOME_L1CAM_INTERACTIONS	rs2286845	7	93994146	BET1	rs267561	3	37533460	ITGA9	dominant	0.388917	0.417001	2.01981	0.889789	protective	NA
KEGG_SNARE_INTERACTIONS_IN_VESICULAR_TRANSPORT	REACTOME_L1CAM_INTERACTIONS	rs2286845	7	93994146	BET1	rs2300014	7	108297798	NRCAM	dominant	0.391174	0.419258	2.01728	0.889976	protective	NA
KEGG_SNARE_INTERACTIONS_IN_VESICULAR_TRANSPORT	REACTOME_L1CAM_INTERACTIONS	rs2551799	17	9297594	STX8	rs6066384	20	37443196	SRC	dominant	0.428536	0.457372	2.01691	0.889672	protective	NA
KEGG_SNARE_INTERACTIONS_IN_VESICULAR_TRANSPORT	REACTOME_L1CAM_INTERACTIONS	rs3757840	7	44191617	YKT6	rs6598858	1	26583274	RPS6KA1	dominant	0.502257	0.529589	2.0135	0.896312	protective	NA
KEGG_SNARE_INTERACTIONS_IN_VESICULAR_TRANSPORT	REACTOME_L1CAM_INTERACTIONS	rs3757840	7	44191617	YKT6	rs12357206	10	60030625	ANK3	dominant	0.519559	0.547643	2.01302	0.893261	protective	NA
KEGG_SNARE_INTERACTIONS_IN_VESICULAR_TRANSPORT	REACTOME_L1CAM_INTERACTIONS	rs3757840	7	44191617	YKT6	rs6066384	20	37443196	SRC	dominant	0.496489	0.531093	2.00297	0.870597	protective	NA
KEGG_SNARE_INTERACTIONS_IN_VESICULAR_TRANSPORT	REACTOME_L1CAM_INTERACTIONS	rs11583530	1	171708037	VAMP4	rs11129795	3	38547672	SCN5A	dominant	0.204865	0.228937	1.99854	0.867761	protective	NA
KEGG_SNARE_INTERACTIONS_IN_VESICULAR_TRANSPORT	REACTOME_L1CAM_INTERACTIONS	rs718097	17	9212088	STX8	rs20559	1	183130425	LAMC1	dominant	0.0702106	0.0855065	1.98435	0.807606	protective	NA
KEGG_SNARE_INTERACTIONS_IN_VESICULAR_TRANSPORT	REACTOME_L1CAM_INTERACTIONS	rs2551799	17	9297594	STX8	rs3759786	15	66337065	MAP2K1	dominant	0.153711	0.175276	1.98227	0.854621	protective	NA
KEGG_SNARE_INTERACTIONS_IN_VESICULAR_TRANSPORT	REACTOME_L1CAM_INTERACTIONS	rs11583530	1	171708037	VAMP4	rs746463	11	110125219	RDX	dominant	0.253511	0.278837	1.98193	0.878327	protective	NA
KEGG_SNARE_INTERACTIONS_IN_VESICULAR_TRANSPORT	REACTOME_L1CAM_INTERACTIONS	rs3757840	7	44191617	YKT6	rs34789048	9	36169726	CLTA	dominant	0.107823	0.12663	1.97658	0.833536	protective	NA
KEGG_SNARE_INTERACTIONS_IN_VESICULAR_TRANSPORT	REACTOME_L1CAM_INTERACTIONS	rs1128349	7	73683324	STX1A	rs10510181	3	149364	CHL1	dominant	0.363591	0.391174	1.97024	0.889202	protective	NA
KEGG_SNARE_INTERACTIONS_IN_VESICULAR_TRANSPORT	REACTOME_L1CAM_INTERACTIONS	rs3757840	7	44191617	YKT6	rs11888208	2	166456941	SCN7A	dominant	0.198596	0.221414	1.96445	0.871404	protective	NA
KEGG_SNARE_INTERACTIONS_IN_VESICULAR_TRANSPORT	REACTOME_L1CAM_INTERACTIONS	rs2236359	1	227747743	SNAP47	rs12019224	3	37473850	ITGA9	dominant	0.374875	0.405216	1.96232	0.880222	protective	NA
KEGG_SNARE_INTERACTIONS_IN_VESICULAR_TRANSPORT	REACTOME_L1CAM_INTERACTIONS	rs3757840	7	44191617	YKT6	rs805262	6	31660956	CSNK2B	dominant	0.520812	0.547643	1.96119	0.897759	protective	NA
KEGG_SNARE_INTERACTIONS_IN_VESICULAR_TRANSPORT	REACTOME_L1CAM_INTERACTIONS	rs1078004	2	85542588	VAMP5/VAMP8	rs7694725	4	113079800	ANK2	dominant	0.227432	0.253511	1.95123	0.866849	protective	NA
KEGG_SNARE_INTERACTIONS_IN_VESICULAR_TRANSPORT	REACTOME_L1CAM_INTERACTIONS	rs2286845	7	93994146	BET1	rs28568406	1	158717373	SPTA1	dominant	0.351555	0.37989	1.94809	0.884975	protective	NA
KEGG_SNARE_INTERACTIONS_IN_VESICULAR_TRANSPORT	REACTOME_L1CAM_INTERACTIONS	rs891203	19	17227073	USE1	rs9853984	3	38608689	SCN5A	dominant	0.131143	0.150953	1.94075	0.848963	protective	NA
KEGG_SNARE_INTERACTIONS_IN_VESICULAR_TRANSPORT	REACTOME_L1CAM_INTERACTIONS	rs1078004	2	85542588	VAMP5/VAMP8	rs267561	3	37533460	ITGA9	dominant	0.467402	0.49674	1.93818	0.889108	protective	NA
KEGG_SNARE_INTERACTIONS_IN_VESICULAR_TRANSPORT	REACTOME_L1CAM_INTERACTIONS	rs6026468	20	58715291	STX16	rs3922844	3	38582762	SCN5A	dominant	0.326981	0.354313	1.9378	0.885381	protective	NA
KEGG_SNARE_INTERACTIONS_IN_VESICULAR_TRANSPORT	REACTOME_L1CAM_INTERACTIONS	rs10849451	12	6415513	VAMP1	rs11604757	11	1029320	AP2A2	dominant	0.158726	0.179288	1.93558	0.863677	protective	NA
KEGG_SNARE_INTERACTIONS_IN_VESICULAR_TRANSPORT	REACTOME_L1CAM_INTERACTIONS	rs25680	12	6445462	VAMP1	rs10510181	3	149364	CHL1	dominant	0.209127	0.233701	1.9116	0.867045	protective	NA
KEGG_SNARE_INTERACTIONS_IN_VESICULAR_TRANSPORT	REACTOME_L1CAM_INTERACTIONS	rs4908482	1	7817428	VAMP3	rs286592	5	154996537	KIF4B	dominant	0.32347	0.349047	1.91031	0.891689	protective	NA
KEGG_SNARE_INTERACTIONS_IN_VESICULAR_TRANSPORT	REACTOME_L1CAM_INTERACTIONS	rs1078004	2	85542588	VAMP5/VAMP8	rs314253	17	7188331	DLG4	dominant	0.378134	0.40672	1.90753	0.886979	protective	NA
KEGG_SNARE_INTERACTIONS_IN_VESICULAR_TRANSPORT	REACTOME_L1CAM_INTERACTIONS	rs1042164	19	13153584	STX10	rs10956647	8	132190597	KCNQ3	dominant	0.131645	0.151204	1.89888	0.851036	protective	NA
KEGG_SNARE_INTERACTIONS_IN_VESICULAR_TRANSPORT	REACTOME_L1CAM_INTERACTIONS	rs4908482	1	7817428	VAMP3	rs3816533	15	41841899	SPTBN5	dominant	0.144684	0.165246	1.89853	0.85452	protective	NA
KEGG_SNARE_INTERACTIONS_IN_VESICULAR_TRANSPORT	REACTOME_L1CAM_INTERACTIONS	rs72878024	11	199492	BET1L	rs2281053	6	166447508	RPS6KA2	dominant	0.0115346	0.0183049	1.89373	0.625821	protective	NA
KEGG_SNARE_INTERACTIONS_IN_VESICULAR_TRANSPORT	REACTOME_L1CAM_INTERACTIONS	rs891203	19	17227073	USE1	rs28568406	1	158717373	SPTA1	dominant	0.124875	0.146439	1.88869	0.831727	protective	NA
KEGG_SNARE_INTERACTIONS_IN_VESICULAR_TRANSPORT	REACTOME_L1CAM_INTERACTIONS	rs2286845	7	93994146	BET1	rs6699312	1	171836182	DNM3	dominant	0.418756	0.446088	1.88386	0.894587	protective	NA
KEGG_SNARE_INTERACTIONS_IN_VESICULAR_TRANSPORT	REACTOME_L1CAM_INTERACTIONS	rs25680	12	6445462	VAMP1	rs1978973	3	105622370	ALCAM	dominant	0.0574223	0.0737212	1.88038	0.765443	protective	NA
KEGG_SNARE_INTERACTIONS_IN_VESICULAR_TRANSPORT	REACTOME_L1CAM_INTERACTIONS	rs11583530	1	171708037	VAMP4	rs177389	14	73260801	NUMB	dominant	0.360331	0.38666	1.87379	0.893549	protective	NA
KEGG_SNARE_INTERACTIONS_IN_VESICULAR_TRANSPORT	REACTOME_L1CAM_INTERACTIONS	rs2236359	1	227747743	SNAP47	rs6952125	7	6330563	RAC1	dominant	0.461886	0.488716	1.87101	0.897977	protective	NA
KEGG_SNARE_INTERACTIONS_IN_VESICULAR_TRANSPORT	REACTOME_L1CAM_INTERACTIONS	rs10100935	8	142344359	TSNARE1	rs353116	2	165277122	SCN2A	dominant	0.351805	0.380642	1.86916	0.883125	protective	NA
KEGG_SNARE_INTERACTIONS_IN_VESICULAR_TRANSPORT	REACTOME_L1CAM_INTERACTIONS	rs3757840	7	44191617	YKT6	rs2276635	2	219222719	TUBA4A/TUBA4B	dominant	0.122367	0.141424	1.86847	0.84646	protective	NA
KEGG_SNARE_INTERACTIONS_IN_VESICULAR_TRANSPORT	REACTOME_L1CAM_INTERACTIONS	rs1128349	7	73683324	STX1A	rs11071896	15	66528912	MAP2K1	dominant	0.311184	0.33676	1.86339	0.889739	protective	NA
KEGG_SNARE_INTERACTIONS_IN_VESICULAR_TRANSPORT	REACTOME_L1CAM_INTERACTIONS	rs4908482	1	7817428	VAMP3	rs10875943	12	49282227	TUBA1C	dominant	0.272066	0.296389	1.86165	0.887264	protective	NA
KEGG_SNARE_INTERACTIONS_IN_VESICULAR_TRANSPORT	REACTOME_L1CAM_INTERACTIONS	rs25680	12	6445462	VAMP1	rs62244081	3	38771518	SCN10A	dominant	0.166499	0.189318	1.85987	0.855393	protective	NA
KEGG_SNARE_INTERACTIONS_IN_VESICULAR_TRANSPORT	REACTOME_L1CAM_INTERACTIONS	rs6026468	20	58715291	STX16	rs71377306	17	47347921	ITGB3	dominant	0.0574223	0.0722166	1.85608	0.782659	protective	NA
KEGG_SNARE_INTERACTIONS_IN_VESICULAR_TRANSPORT	REACTOME_L1CAM_INTERACTIONS	rs499033	11	59713478	STX3	rs3759786	15	66337065	MAP2K1	dominant	0.0411234	0.0534102	1.8534	0.760087	protective	NA
KEGG_SNARE_INTERACTIONS_IN_VESICULAR_TRANSPORT	REACTOME_L1CAM_INTERACTIONS	rs2551799	17	9297594	STX8	rs1380453	10	60274597	ANK3	dominant	0.449599	0.476179	1.847	0.898585	protective	NA
KEGG_SNARE_INTERACTIONS_IN_VESICULAR_TRANSPORT	REACTOME_L1CAM_INTERACTIONS	rs11583530	1	171708037	VAMP4	rs1011731	1	172377408	DNM3	dominant	0.313942	0.339519	1.84545	0.890195	protective	NA
KEGG_SNARE_INTERACTIONS_IN_VESICULAR_TRANSPORT	REACTOME_L1CAM_INTERACTIONS	rs11167136	8	142229454	TSNARE1	rs2293079	2	219236065	TUBA4A/TUBA4B	dominant	0.15998	0.182297	1.84368	0.854264	protective	NA
KEGG_SNARE_INTERACTIONS_IN_VESICULAR_TRANSPORT	REACTOME_L1CAM_INTERACTIONS	rs2551799	17	9297594	STX8	rs11888208	2	166456941	SCN7A	dominant	0.167001	0.188315	1.84284	0.864127	protective	NA
KEGG_SNARE_INTERACTIONS_IN_VESICULAR_TRANSPORT	REACTOME_L1CAM_INTERACTIONS	rs2286845	7	93994146	BET1	rs723077	11	113323446	NCAM1	dominant	0.433551	0.460632	1.83854	0.89621	protective	NA
KEGG_SNARE_INTERACTIONS_IN_VESICULAR_TRANSPORT	REACTOME_L1CAM_INTERACTIONS	rs10521157	17	9433053	STX8	rs35710474	7	107959361	LAMB1	dominant	0.0453862	0.057673	1.83297	0.776828	protective	NA
KEGG_SNARE_INTERACTIONS_IN_VESICULAR_TRANSPORT	REACTOME_L1CAM_INTERACTIONS	rs1195569	12	130740926	STX2	rs353116	2	165277122	SCN2A	dominant	0.455366	0.484955	1.83103	0.887973	protective	NA
KEGG_SNARE_INTERACTIONS_IN_VESICULAR_TRANSPORT	REACTOME_L1CAM_INTERACTIONS	rs6026468	20	58715291	STX16	rs584427	11	113233274	NCAM1	dominant	0.45988	0.488465	1.83066	0.891651	protective	NA
KEGG_SNARE_INTERACTIONS_IN_VESICULAR_TRANSPORT	REACTOME_L1CAM_INTERACTIONS	rs11583530	1	171708037	VAMP4	rs2227983	7	55161562	EGFR	dominant	0.222919	0.246489	1.82741	0.876943	protective	NA
KEGG_SNARE_INTERACTIONS_IN_VESICULAR_TRANSPORT	REACTOME_L1CAM_INTERACTIONS	rs2236359	1	227747743	SNAP47	rs62244081	3	38771518	SCN10A	dominant	0.274072	0.298395	1.82628	0.887713	protective	NA
KEGG_SNARE_INTERACTIONS_IN_VESICULAR_TRANSPORT	REACTOME_L1CAM_INTERACTIONS	rs3795504	1	180936312	STX6	rs2293079	2	219236065	TUBA4A/TUBA4B	dominant	0.161986	0.184303	1.82546	0.855505	protective	NA
KEGG_SNARE_INTERACTIONS_IN_VESICULAR_TRANSPORT	REACTOME_L1CAM_INTERACTIONS	rs3027232	17	8118747	VAMP2	rs280371	12	41114842	CNTN1	dominant	0.0629388	0.0767302	1.8233	0.808189	protective	NA
KEGG_SNARE_INTERACTIONS_IN_VESICULAR_TRANSPORT	REACTOME_L1CAM_INTERACTIONS	rs2551799	17	9297594	STX8	rs11071896	15	66528912	MAP2K1	dominant	0.288114	0.312939	1.81697	0.888568	protective	NA
KEGG_SNARE_INTERACTIONS_IN_VESICULAR_TRANSPORT	REACTOME_L1CAM_INTERACTIONS	rs11246020	11	233067	BET1L	rs303819	12	51821318	SCN8A	dominant	0.0927783	0.109328	1.81457	0.833143	protective	NA
KEGG_SNARE_INTERACTIONS_IN_VESICULAR_TRANSPORT	REACTOME_L1CAM_INTERACTIONS	rs3027232	17	8118747	VAMP2	rs2300014	7	108297798	NRCAM	dominant	0.253511	0.277332	1.81273	0.884935	protective	NA
KEGG_SNARE_INTERACTIONS_IN_VESICULAR_TRANSPORT	REACTOME_L1CAM_INTERACTIONS	rs4908482	1	7817428	VAMP3	rs20559	1	183130425	LAMC1	dominant	0.0561685	0.0707121	1.80461	0.782086	protective	NA
KEGG_SNARE_INTERACTIONS_IN_VESICULAR_TRANSPORT	REACTOME_L1CAM_INTERACTIONS	rs1128349	7	73683324	STX1A	rs41273499	1	158562824	SPTA1	dominant	0.0937813	0.11008	1.80212	0.836614	protective	NA
KEGG_SNARE_INTERACTIONS_IN_VESICULAR_TRANSPORT	REACTOME_L1CAM_INTERACTIONS	rs2236359	1	227747743	SNAP47	rs7006290	8	41757620	ANK1	dominant	0.349047	0.374373	1.80111	0.896077	protective	NA
KEGG_SNARE_INTERACTIONS_IN_VESICULAR_TRANSPORT	REACTOME_L1CAM_INTERACTIONS	rs6026468	20	58715291	STX16	rs1201689	15	41813720	SPTBN5	dominant	0.379137	0.405466	1.79468	0.895412	protective	NA
KEGG_SNARE_INTERACTIONS_IN_VESICULAR_TRANSPORT	REACTOME_L1CAM_INTERACTIONS	rs2286845	7	93994146	BET1	rs1155741	3	37585621	ITGA9	dominant	0.347793	0.373872	1.78727	0.893053	protective	NA
KEGG_SNARE_INTERACTIONS_IN_VESICULAR_TRANSPORT	REACTOME_L1CAM_INTERACTIONS	rs1078004	2	85542588	VAMP5/VAMP8	rs3813563	14	73492108	NUMB	dominant	0.481194	0.509779	1.78725	0.891916	protective	NA
KEGG_SNARE_INTERACTIONS_IN_VESICULAR_TRANSPORT	REACTOME_L1CAM_INTERACTIONS	rs3757840	7	44191617	YKT6	rs3922844	3	38582762	SCN5A	dominant	0.373621	0.398696	1.78703	0.899593	protective	NA
KEGG_SNARE_INTERACTIONS_IN_VESICULAR_TRANSPORT	REACTOME_L1CAM_INTERACTIONS	rs2532500	12	6453644	VAMP1	rs7694725	4	113079800	ANK2	dominant	0.171765	0.193831	1.78359	0.862548	protective	NA
KEGG_SNARE_INTERACTIONS_IN_VESICULAR_TRANSPORT	REACTOME_L1CAM_INTERACTIONS	rs10849451	12	6415513	VAMP1	rs28568406	1	158717373	SPTA1	dominant	0.445336	0.47342	1.78061	0.893049	protective	NA
KEGG_SNARE_INTERACTIONS_IN_VESICULAR_TRANSPORT	REACTOME_L1CAM_INTERACTIONS	rs11246020	11	233067	BET1L	rs11071896	15	66528912	MAP2K1	dominant	0.185807	0.207874	1.78041	0.869623	protective	NA
KEGG_SNARE_INTERACTIONS_IN_VESICULAR_TRANSPORT	REACTOME_L1CAM_INTERACTIONS	rs3757840	7	44191617	YKT6	rs584427	11	113233274	NCAM1	dominant	0.520562	0.545888	1.77626	0.903232	protective	NA
KEGG_SNARE_INTERACTIONS_IN_VESICULAR_TRANSPORT	REACTOME_L1CAM_INTERACTIONS	rs3757840	7	44191617	YKT6	rs2300014	7	108297798	NRCAM	dominant	0.49323	0.518556	1.76511	0.903626	protective	NA
KEGG_SNARE_INTERACTIONS_IN_VESICULAR_TRANSPORT	REACTOME_L1CAM_INTERACTIONS	rs4908482	1	7817428	VAMP3	rs607230	18	6980524	LAMA1	dominant	0.282096	0.305918	1.76415	0.891533	protective	NA
KEGG_SNARE_INTERACTIONS_IN_VESICULAR_TRANSPORT	REACTOME_L1CAM_INTERACTIONS	rs25680	12	6445462	VAMP1	rs2804918	6	13584351	RANBP9	dominant	0.238215	0.262788	1.76286	0.877247	protective	NA
KEGG_SNARE_INTERACTIONS_IN_VESICULAR_TRANSPORT	REACTOME_L1CAM_INTERACTIONS	rs3757840	7	44191617	YKT6	rs10510181	3	149364	CHL1	dominant	0.388164	0.414243	1.7618	0.897106	protective	NA
KEGG_SNARE_INTERACTIONS_IN_VESICULAR_TRANSPORT	REACTOME_L1CAM_INTERACTIONS	rs10849451	12	6415513	VAMP1	rs3816533	15	41841899	SPTBN5	dominant	0.18656	0.206871	1.75907	0.879301	protective	NA
KEGG_SNARE_INTERACTIONS_IN_VESICULAR_TRANSPORT	REACTOME_L1CAM_INTERACTIONS	rs28494095	7	73683390	STX1A	rs34282046	19	19194090	NCAN	dominant	0.0110331	0.0178034	1.75881	0.615476	protective	NA
KEGG_SNARE_INTERACTIONS_IN_VESICULAR_TRANSPORT	REACTOME_L1CAM_INTERACTIONS	rs10521157	17	9433053	STX8	rs7694725	4	113079800	ANK2	dominant	0.1334	0.153711	1.74633	0.847522	protective	NA
KEGG_SNARE_INTERACTIONS_IN_VESICULAR_TRANSPORT	REACTOME_L1CAM_INTERACTIONS	rs3795504	1	180936312	STX6	rs303819	12	51821318	SCN8A	dominant	0.169509	0.190321	1.74526	0.868326	protective	NA
KEGG_SNARE_INTERACTIONS_IN_VESICULAR_TRANSPORT	REACTOME_L1CAM_INTERACTIONS	rs4908482	1	7817428	VAMP3	rs857725	1	158638145	SPTA1	dominant	0.258776	0.28335	1.74453	0.882997	protective	NA
KEGG_SNARE_INTERACTIONS_IN_VESICULAR_TRANSPORT	REACTOME_L1CAM_INTERACTIONS	rs3757840	7	44191617	YKT6	rs41273499	1	158562824	SPTA1	dominant	0.0980441	0.115095	1.73599	0.835748	protective	NA
KEGG_SNARE_INTERACTIONS_IN_VESICULAR_TRANSPORT	REACTOME_L1CAM_INTERACTIONS	rs4908482	1	7817428	VAMP3	rs805262	6	31660956	CSNK2B	dominant	0.424022	0.449097	1.73447	0.903061	protective	NA
KEGG_SNARE_INTERACTIONS_IN_VESICULAR_TRANSPORT	REACTOME_L1CAM_INTERACTIONS	rs11583530	1	171708037	VAMP4	rs2229866	1	205061988	CNTN2/NFASC	dominant	0.28335	0.307673	1.73357	0.889689	protective	NA
KEGG_SNARE_INTERACTIONS_IN_VESICULAR_TRANSPORT	REACTOME_L1CAM_INTERACTIONS	rs11583530	1	171708037	VAMP4	rs229587	14	64796582	SPTB	dominant	0.288114	0.312437	1.72093	0.890644	protective	NA
KEGG_SNARE_INTERACTIONS_IN_VESICULAR_TRANSPORT	REACTOME_L1CAM_INTERACTIONS	rs1128349	7	73683324	STX1A	rs2293079	2	219236065	TUBA4A/TUBA4B	dominant	0.161484	0.1833	1.71517	0.858065	protective	NA
KEGG_SNARE_INTERACTIONS_IN_VESICULAR_TRANSPORT	REACTOME_L1CAM_INTERACTIONS	rs4908482	1	7817428	VAMP3	rs2293079	2	219236065	TUBA4A/TUBA4B	dominant	0.138415	0.159228	1.70905	0.848293	protective	NA
KEGG_SNARE_INTERACTIONS_IN_VESICULAR_TRANSPORT	REACTOME_L1CAM_INTERACTIONS	rs2236359	1	227747743	SNAP47	rs607230	18	6980524	LAMA1	dominant	0.307422	0.331494	1.70844	0.895149	protective	NA
KEGG_SNARE_INTERACTIONS_IN_VESICULAR_TRANSPORT	REACTOME_L1CAM_INTERACTIONS	rs6026468	20	58715291	STX16	rs17346452	1	172084147	DNM3	dominant	0.294383	0.317703	1.70697	0.895975	protective	NA
KEGG_SNARE_INTERACTIONS_IN_VESICULAR_TRANSPORT	REACTOME_L1CAM_INTERACTIONS	rs11583530	1	171708037	VAMP4	rs6598858	1	26583274	RPS6KA1	dominant	0.350802	0.375878	1.7053	0.897241	protective	NA
KEGG_SNARE_INTERACTIONS_IN_VESICULAR_TRANSPORT	REACTOME_L1CAM_INTERACTIONS	rs2908290	7	44176538	YKT6	rs2228479	16	89919532	TUBB3	dominant	0.0882648	0.104062	1.69922	0.833496	protective	NA
KEGG_SNARE_INTERACTIONS_IN_VESICULAR_TRANSPORT	REACTOME_L1CAM_INTERACTIONS	rs362988	20	10300722	SNAP25	rs1978973	3	105622370	ALCAM	dominant	0.102558	0.121364	1.698	0.827333	protective	NA
KEGG_SNARE_INTERACTIONS_IN_VESICULAR_TRANSPORT	REACTOME_L1CAM_INTERACTIONS	rs891203	19	17227073	USE1	rs2403730	8	132079891	KCNQ3	dominant	0.11334	0.130893	1.69781	0.848759	protective	NA
KEGG_SNARE_INTERACTIONS_IN_VESICULAR_TRANSPORT	REACTOME_L1CAM_INTERACTIONS	rs2286845	7	93994146	BET1	rs7006290	8	41757620	ANK1	dominant	0.318455	0.343531	1.69664	0.892901	protective	NA
KEGG_SNARE_INTERACTIONS_IN_VESICULAR_TRANSPORT	REACTOME_L1CAM_INTERACTIONS	rs2551799	17	9297594	STX8	rs6952125	7	6330563	RAC1	dominant	0.452357	0.477432	1.69577	0.904096	protective	NA
KEGG_SNARE_INTERACTIONS_IN_VESICULAR_TRANSPORT	REACTOME_L1CAM_INTERACTIONS	rs41278952	1	7737443	VAMP3	rs286592	5	154996537	KIF4B	dominant	0.127131	0.144935	1.691	0.859272	protective	NA
KEGG_SNARE_INTERACTIONS_IN_VESICULAR_TRANSPORT	REACTOME_L1CAM_INTERACTIONS	rs1078004	2	85542588	VAMP5/VAMP8	rs1380453	10	60274597	ANK3	dominant	0.502508	0.530341	1.68882	0.894506	protective	NA
KEGG_SNARE_INTERACTIONS_IN_VESICULAR_TRANSPORT	REACTOME_L1CAM_INTERACTIONS	rs10849451	12	6415513	VAMP1	rs12205572	6	166365976	RPS6KA2	dominant	0.0772317	0.0915246	1.68682	0.830765	protective	NA
KEGG_SNARE_INTERACTIONS_IN_VESICULAR_TRANSPORT	REACTOME_L1CAM_INTERACTIONS	rs3757840	7	44191617	YKT6	rs71377306	17	47347921	ITGB3	dominant	0.0674524	0.0824975	1.68328	0.804438	protective	NA
KEGG_SNARE_INTERACTIONS_IN_VESICULAR_TRANSPORT	REACTOME_L1CAM_INTERACTIONS	rs2236359	1	227747743	SNAP47	rs805262	6	31660956	CSNK2B	dominant	0.467402	0.492477	1.68323	0.9044	protective	NA
KEGG_SNARE_INTERACTIONS_IN_VESICULAR_TRANSPORT	REACTOME_L1CAM_INTERACTIONS	rs28494095	7	73683390	STX1A	rs1978973	3	105622370	ALCAM	dominant	0.0210632	0.0310933	1.68237	0.670479	protective	NA
KEGG_SNARE_INTERACTIONS_IN_VESICULAR_TRANSPORT	REACTOME_L1CAM_INTERACTIONS	rs3757840	7	44191617	YKT6	rs177389	14	73260801	NUMB	dominant	0.514293	0.538867	1.68128	0.906111	protective	NA
KEGG_SNARE_INTERACTIONS_IN_VESICULAR_TRANSPORT	REACTOME_L1CAM_INTERACTIONS	rs1356732950	6	132538470	STX7	rs11604757	11	1029320	AP2A2	dominant	0.102056	0.119107	1.68096	0.840571	protective	NA
KEGG_SNARE_INTERACTIONS_IN_VESICULAR_TRANSPORT	REACTOME_L1CAM_INTERACTIONS	rs10521157	17	9433053	STX8	rs11604757	11	1029320	AP2A2	dominant	0.0910231	0.107322	1.68005	0.832923	protective	NA
KEGG_SNARE_INTERACTIONS_IN_VESICULAR_TRANSPORT	REACTOME_L1CAM_INTERACTIONS	rs28494095	7	73683390	STX1A	rs6764363	3	270666	CHL1	dominant	0.080993	0.0952859	1.67054	0.83678	protective	NA
KEGG_SNARE_INTERACTIONS_IN_VESICULAR_TRANSPORT	REACTOME_L1CAM_INTERACTIONS	rs3757840	7	44191617	YKT6	rs34162626	6	13611846	RANBP9	dominant	0.0752257	0.0905216	1.66976	0.81728	protective	NA
KEGG_SNARE_INTERACTIONS_IN_VESICULAR_TRANSPORT	REACTOME_L1CAM_INTERACTIONS	rs25680	12	6445462	VAMP1	rs805262	6	31660956	CSNK2B	dominant	0.284353	0.309428	1.66889	0.886764	protective	NA
KEGG_SNARE_INTERACTIONS_IN_VESICULAR_TRANSPORT	REACTOME_L1CAM_INTERACTIONS	rs4908482	1	7817428	VAMP3	rs2283125	9	133727220	VAV2	dominant	0.293129	0.316449	1.66874	0.895748	protective	NA
KEGG_SNARE_INTERACTIONS_IN_VESICULAR_TRANSPORT	REACTOME_L1CAM_INTERACTIONS	rs9676419	19	17256626	USE1	rs1805007	16	89919709	TUBB3	dominant	0.0448847	0.05667	1.66633	0.782262	protective	NA
KEGG_SNARE_INTERACTIONS_IN_VESICULAR_TRANSPORT	REACTOME_L1CAM_INTERACTIONS	rs1195569	12	130740926	STX2	rs694739	11	64329761	RPS6KA4	dominant	0.424774	0.454614	1.66576	0.885893	protective	NA
KEGG_SNARE_INTERACTIONS_IN_VESICULAR_TRANSPORT	REACTOME_L1CAM_INTERACTIONS	rs2286845	7	93994146	BET1	rs314253	17	7188331	DLG4	dominant	0.317202	0.342026	1.66226	0.893701	protective	NA
KEGG_SNARE_INTERACTIONS_IN_VESICULAR_TRANSPORT	REACTOME_L1CAM_INTERACTIONS	rs6026468	20	58715291	STX16	rs16915157	10	60586880	ANK3	dominant	0.215396	0.235707	1.66214	0.890174	protective	NA
KEGG_SNARE_INTERACTIONS_IN_VESICULAR_TRANSPORT	REACTOME_L1CAM_INTERACTIONS	rs2286845	7	93994146	BET1	rs11604757	11	1029320	AP2A2	dominant	0.122869	0.142177	1.65479	0.845174	protective	NA
KEGG_SNARE_INTERACTIONS_IN_VESICULAR_TRANSPORT	REACTOME_L1CAM_INTERACTIONS	rs6026468	20	58715291	STX16	rs2403730	8	132079891	KCNQ3	dominant	0.33676	0.359579	1.65007	0.90432	protective	NA
KEGG_SNARE_INTERACTIONS_IN_VESICULAR_TRANSPORT	REACTOME_L1CAM_INTERACTIONS	rs1078004	2	85542588	VAMP5/VAMP8	rs2403730	8	132079891	KCNQ3	dominant	0.372116	0.398947	1.64376	0.892889	protective	NA
KEGG_SNARE_INTERACTIONS_IN_VESICULAR_TRANSPORT	REACTOME_L1CAM_INTERACTIONS	rs4908482	1	7817428	VAMP3	rs6699312	1	171836182	DNM3	dominant	0.419007	0.44333	1.63991	0.905568	protective	NA
KEGG_SNARE_INTERACTIONS_IN_VESICULAR_TRANSPORT	REACTOME_L1CAM_INTERACTIONS	rs2236359	1	227747743	SNAP47	rs7694725	4	113079800	ANK2	dominant	0.212136	0.234704	1.63757	0.877956	protective	NA
KEGG_SNARE_INTERACTIONS_IN_VESICULAR_TRANSPORT	REACTOME_L1CAM_INTERACTIONS	rs4908482	1	7817428	VAMP3	rs62244081	3	38771518	SCN10A	dominant	0.252508	0.274824	1.63588	0.891364	protective	NA
KEGG_SNARE_INTERACTIONS_IN_VESICULAR_TRANSPORT	REACTOME_L1CAM_INTERACTIONS	rs3795504	1	180936312	STX6	rs3816533	15	41841899	SPTBN5	dominant	0.173019	0.192828	1.63178	0.875776	protective	NA
KEGG_SNARE_INTERACTIONS_IN_VESICULAR_TRANSPORT	REACTOME_L1CAM_INTERACTIONS	rs3757840	7	44191617	YKT6	rs303819	12	51821318	SCN8A	dominant	0.180291	0.200351	1.63123	0.877853	protective	NA
KEGG_SNARE_INTERACTIONS_IN_VESICULAR_TRANSPORT	REACTOME_L1CAM_INTERACTIONS	rs1078004	2	85542588	VAMP5/VAMP8	rs280371	12	41114842	CNTN1	dominant	0.117352	0.137663	1.62914	0.832843	protective	NA
KEGG_SNARE_INTERACTIONS_IN_VESICULAR_TRANSPORT	REACTOME_L1CAM_INTERACTIONS	rs25680	12	6445462	VAMP1	rs12019224	3	37473850	ITGA9	dominant	0.227683	0.251254	1.6291	0.878531	protective	NA
KEGG_SNARE_INTERACTIONS_IN_VESICULAR_TRANSPORT	REACTOME_L1CAM_INTERACTIONS	rs41278952	1	7737443	VAMP3	rs3816533	15	41841899	SPTBN5	dominant	0.0574223	0.0707121	1.62866	0.800607	protective	NA
KEGG_SNARE_INTERACTIONS_IN_VESICULAR_TRANSPORT	REACTOME_L1CAM_INTERACTIONS	rs1042164	19	13153584	STX10	rs1499280	5	52801055	ITGA1	dominant	0.0423771	0.054664	1.62843	0.765283	protective	NA
KEGG_SNARE_INTERACTIONS_IN_VESICULAR_TRANSPORT	REACTOME_L1CAM_INTERACTIONS	rs2236359	1	227747743	SNAP47	rs746463	11	110125219	RDX	dominant	0.33325	0.357071	1.62635	0.899942	protective	NA
KEGG_SNARE_INTERACTIONS_IN_VESICULAR_TRANSPORT	REACTOME_L1CAM_INTERACTIONS	rs6026468	20	58715291	STX16	rs6598858	1	26583274	RPS6KA1	dominant	0.439318	0.46339	1.62222	0.907348	protective	NA
KEGG_SNARE_INTERACTIONS_IN_VESICULAR_TRANSPORT	REACTOME_L1CAM_INTERACTIONS	rs25680	12	6445462	VAMP1	rs267561	3	37533460	ITGA9	dominant	0.260532	0.284855	1.62212	0.884529	protective	NA
KEGG_SNARE_INTERACTIONS_IN_VESICULAR_TRANSPORT	REACTOME_L1CAM_INTERACTIONS	rs2236359	1	227747743	SNAP47	rs723077	11	113323446	NCAM1	dominant	0.476931	0.501505	1.61851	0.906322	protective	NA
KEGG_SNARE_INTERACTIONS_IN_VESICULAR_TRANSPORT	REACTOME_L1CAM_INTERACTIONS	rs10462024	17	8148321	VAMP2	rs20559	1	183130425	LAMC1	dominant	0.0614343	0.0747242	1.61816	0.810506	protective	NA
KEGG_SNARE_INTERACTIONS_IN_VESICULAR_TRANSPORT	REACTOME_L1CAM_INTERACTIONS	rs3757840	7	44191617	YKT6	rs9853984	3	38608689	SCN5A	dominant	0.467151	0.491224	1.61126	0.908033	protective	NA
KEGG_SNARE_INTERACTIONS_IN_VESICULAR_TRANSPORT	REACTOME_L1CAM_INTERACTIONS	rs11583530	1	171708037	VAMP4	rs2776937	10	33317261	NRP1	dominant	0.217151	0.239218	1.60946	0.88217	protective	NA
KEGG_SNARE_INTERACTIONS_IN_VESICULAR_TRANSPORT	REACTOME_L1CAM_INTERACTIONS	rs2551799	17	9297594	STX8	rs29302	4	113303436	ANK2	dominant	0.419759	0.444082	1.60922	0.905606	protective	NA
KEGG_SNARE_INTERACTIONS_IN_VESICULAR_TRANSPORT	REACTOME_L1CAM_INTERACTIONS	rs891203	19	17227073	USE1	rs2229866	1	205061988	CNTN2/NFASC	dominant	0.117101	0.134403	1.609	0.854195	protective	NA
KEGG_SNARE_INTERACTIONS_IN_VESICULAR_TRANSPORT	REACTOME_L1CAM_INTERACTIONS	rs72878024	11	199492	BET1L	rs1801475	20	63406924	KCNQ2	dominant	0.0754764	0.0895186	1.60785	0.830331	protective	NA
KEGG_SNARE_INTERACTIONS_IN_VESICULAR_TRANSPORT	REACTOME_L1CAM_INTERACTIONS	rs1078004	2	85542588	VAMP5/VAMP8	rs17346452	1	172084147	DNM3	dominant	0.329739	0.355817	1.60567	0.890653	protective	NA
KEGG_SNARE_INTERACTIONS_IN_VESICULAR_TRANSPORT	REACTOME_L1CAM_INTERACTIONS	rs7216991	17	46974887	GOSR2	rs2293079	2	219236065	TUBA4A/TUBA4B	dominant	0.177031	0.201354	1.60429	0.853218	protective	NA
KEGG_SNARE_INTERACTIONS_IN_VESICULAR_TRANSPORT	REACTOME_L1CAM_INTERACTIONS	rs6026468	20	58715291	STX16	rs314253	17	7188331	DLG4	dominant	0.344534	0.366851	1.59964	0.90719	protective	NA
KEGG_SNARE_INTERACTIONS_IN_VESICULAR_TRANSPORT	REACTOME_L1CAM_INTERACTIONS	rs891203	19	17227073	USE1	rs1978973	3	105622370	ALCAM	dominant	0.029338	0.0403711	1.59915	0.718448	protective	NA
KEGG_SNARE_INTERACTIONS_IN_VESICULAR_TRANSPORT	REACTOME_L1CAM_INTERACTIONS	rs2551799	17	9297594	STX8	rs2403730	8	132079891	KCNQ3	dominant	0.335005	0.358576	1.5986	0.901151	protective	NA
KEGG_SNARE_INTERACTIONS_IN_VESICULAR_TRANSPORT	REACTOME_L1CAM_INTERACTIONS	rs1078004	2	85542588	VAMP5/VAMP8	rs10875943	12	49282227	TUBA1C	dominant	0.333751	0.359829	1.59705	0.891221	protective	NA
KEGG_SNARE_INTERACTIONS_IN_VESICULAR_TRANSPORT	REACTOME_L1CAM_INTERACTIONS	rs2236359	1	227747743	SNAP47	rs1011731	1	172377408	DNM3	dominant	0.427533	0.451856	1.59523	0.90597	protective	NA
KEGG_SNARE_INTERACTIONS_IN_VESICULAR_TRANSPORT	REACTOME_L1CAM_INTERACTIONS	rs10521157	17	9433053	STX8	rs177389	14	73260801	NUMB	dominant	0.29338	0.316951	1.59165	0.894757	protective	NA
KEGG_SNARE_INTERACTIONS_IN_VESICULAR_TRANSPORT	REACTOME_L1CAM_INTERACTIONS	rs1078004	2	85542588	VAMP5/VAMP8	rs3739609	9	36169601	CLTA	dominant	0.461384	0.488465	1.58629	0.897067	protective	NA
KEGG_SNARE_INTERACTIONS_IN_VESICULAR_TRANSPORT	REACTOME_L1CAM_INTERACTIONS	rs11583530	1	171708037	VAMP4	rs3018474	11	77504355	PAK1	dominant	0.333751	0.357823	1.58629	0.899026	protective	NA
KEGG_SNARE_INTERACTIONS_IN_VESICULAR_TRANSPORT	REACTOME_L1CAM_INTERACTIONS	rs28494095	7	73683390	STX1A	rs1201689	15	41813720	SPTBN5	dominant	0.081996	0.0985456	1.57928	0.817061	protective	NA
KEGG_SNARE_INTERACTIONS_IN_VESICULAR_TRANSPORT	REACTOME_L1CAM_INTERACTIONS	rs3795504	1	180936312	STX6	rs1201689	15	41813720	SPTBN5	dominant	0.422768	0.447844	1.57533	0.903001	protective	NA
KEGG_SNARE_INTERACTIONS_IN_VESICULAR_TRANSPORT	REACTOME_L1CAM_INTERACTIONS	rs1411478	1	180993146	STX6	rs34789048	9	36169726	CLTA	dominant	0.0992979	0.115848	1.57513	0.841394	protective	NA
KEGG_SNARE_INTERACTIONS_IN_VESICULAR_TRANSPORT	REACTOME_L1CAM_INTERACTIONS	rs3757840	7	44191617	YKT6	rs4916245	1	172236886	DNM3	dominant	0.5	0.525827	1.57353	0.901764	protective	NA
KEGG_SNARE_INTERACTIONS_IN_VESICULAR_TRANSPORT	REACTOME_L1CAM_INTERACTIONS	rs2236359	1	227747743	SNAP47	rs9853984	3	38608689	SCN5A	dominant	0.412487	0.43656	1.57112	0.906145	protective	NA
KEGG_SNARE_INTERACTIONS_IN_VESICULAR_TRANSPORT	REACTOME_L1CAM_INTERACTIONS	rs10902112	11	244106	BET1L	rs16915157	10	60586880	ANK3	dominant	0.152708	0.170762	1.56459	0.875218	protective	NA
KEGG_SNARE_INTERACTIONS_IN_VESICULAR_TRANSPORT	REACTOME_L1CAM_INTERACTIONS	rs25680	12	6445462	VAMP1	rs226441	17	35706053	AP2B1	dominant	0.275577	0.2999	1.5637	0.888044	protective	NA
KEGG_SNARE_INTERACTIONS_IN_VESICULAR_TRANSPORT	REACTOME_L1CAM_INTERACTIONS	rs2551799	17	9297594	STX8	rs607230	18	6980524	LAMA1	dominant	0.299398	0.322217	1.56297	0.89892	protective	NA
KEGG_SNARE_INTERACTIONS_IN_VESICULAR_TRANSPORT	REACTOME_L1CAM_INTERACTIONS	rs10521157	17	9433053	STX8	rs1531545	5	52897456	ITGA1	dominant	0.304162	0.325978	1.55878	0.903824	protective	NA
KEGG_SNARE_INTERACTIONS_IN_VESICULAR_TRANSPORT	REACTOME_L1CAM_INTERACTIONS	rs25680	12	6445462	VAMP1	rs11129795	3	38547672	SCN5A	dominant	0.153711	0.174524	1.55819	0.859087	protective	NA
KEGG_SNARE_INTERACTIONS_IN_VESICULAR_TRANSPORT	REACTOME_L1CAM_INTERACTIONS	rs2551799	17	9297594	STX8	rs9853984	3	38608689	SCN5A	dominant	0.399699	0.423521	1.55723	0.906303	protective	NA
KEGG_SNARE_INTERACTIONS_IN_VESICULAR_TRANSPORT	REACTOME_L1CAM_INTERACTIONS	rs718097	17	9212088	STX8	rs11071896	15	66528912	MAP2K1	dominant	0.342528	0.366349	1.55639	0.9011	protective	NA
KEGG_SNARE_INTERACTIONS_IN_VESICULAR_TRANSPORT	REACTOME_L1CAM_INTERACTIONS	rs2286845	7	93994146	BET1	rs177389	14	73260801	NUMB	dominant	0.419258	0.444333	1.55424	0.902825	protective	NA
KEGG_SNARE_INTERACTIONS_IN_VESICULAR_TRANSPORT	REACTOME_L1CAM_INTERACTIONS	rs11167136	8	142229454	TSNARE1	rs34789048	9	36169726	CLTA	dominant	0.10331	0.11986	1.55175	0.846017	protective	NA
KEGG_SNARE_INTERACTIONS_IN_VESICULAR_TRANSPORT	REACTOME_L1CAM_INTERACTIONS	rs10462024	17	8148321	VAMP2	rs2228479	16	89919532	TUBB3	dominant	0.0975426	0.112337	1.55166	0.854069	protective	NA
KEGG_SNARE_INTERACTIONS_IN_VESICULAR_TRANSPORT	REACTOME_L1CAM_INTERACTIONS	rs11583530	1	171708037	VAMP4	rs303819	12	51821318	SCN8A	dominant	0.126128	0.144684	1.54832	0.85324	protective	NA
KEGG_SNARE_INTERACTIONS_IN_VESICULAR_TRANSPORT	REACTOME_L1CAM_INTERACTIONS	rs11583530	1	171708037	VAMP4	rs2261033	6	31635814	CSNK2B	dominant	0.372116	0.397944	1.54278	0.896633	protective	NA
KEGG_SNARE_INTERACTIONS_IN_VESICULAR_TRANSPORT	REACTOME_L1CAM_INTERACTIONS	rs2551799	17	9297594	STX8	rs13164431	5	52868086	ITGA1	dominant	0.424524	0.448345	1.54218	0.907673	protective	NA
KEGG_SNARE_INTERACTIONS_IN_VESICULAR_TRANSPORT	REACTOME_L1CAM_INTERACTIONS	rs6026468	20	58715291	STX16	rs2293079	2	219236065	TUBA4A/TUBA4B	dominant	0.149198	0.169759	1.54115	0.857637	protective	NA
KEGG_SNARE_INTERACTIONS_IN_VESICULAR_TRANSPORT	REACTOME_L1CAM_INTERACTIONS	rs4908482	1	7817428	VAMP3	rs584427	11	113233274	NCAM1	dominant	0.426279	0.44985	1.54037	0.908672	protective	NA
KEGG_SNARE_INTERACTIONS_IN_VESICULAR_TRANSPORT	REACTOME_L1CAM_INTERACTIONS	rs11583530	1	171708037	VAMP4	rs286592	5	154996537	KIF4B	dominant	0.285858	0.308927	1.53907	0.895434	protective	NA
KEGG_SNARE_INTERACTIONS_IN_VESICULAR_TRANSPORT	REACTOME_L1CAM_INTERACTIONS	rs11583530	1	171708037	VAMP4	rs685870	11	64344456	RPS6KA4	dominant	0.258776	0.281344	1.53823	0.891782	protective	NA
KEGG_SNARE_INTERACTIONS_IN_VESICULAR_TRANSPORT	REACTOME_L1CAM_INTERACTIONS	rs25680	12	6445462	VAMP1	rs9853984	3	38608689	SCN5A	dominant	0.248495	0.272066	1.53502	0.884717	protective	NA
KEGG_SNARE_INTERACTIONS_IN_VESICULAR_TRANSPORT	REACTOME_L1CAM_INTERACTIONS	rs25680	12	6445462	VAMP1	rs4916245	1	172236886	DNM3	dominant	0.271565	0.295637	1.53313	0.888219	protective	NA
KEGG_SNARE_INTERACTIONS_IN_VESICULAR_TRANSPORT	REACTOME_L1CAM_INTERACTIONS	rs1042164	19	13153584	STX10	rs16951095	18	7042912	LAMA1	dominant	0.0315948	0.0413741	1.52909	0.755925	protective	NA
KEGG_SNARE_INTERACTIONS_IN_VESICULAR_TRANSPORT	REACTOME_L1CAM_INTERACTIONS	rs1078004	2	85542588	VAMP5/VAMP8	rs12357206	10	60030625	ANK3	dominant	0.505015	0.531846	1.52522	0.898082	protective	NA
KEGG_SNARE_INTERACTIONS_IN_VESICULAR_TRANSPORT	REACTOME_L1CAM_INTERACTIONS	rs10462024	17	8148321	VAMP2	rs1531545	5	52897456	ITGA1	dominant	0.469659	0.496991	1.5229	0.896303	protective	NA
KEGG_SNARE_INTERACTIONS_IN_VESICULAR_TRANSPORT	REACTOME_L1CAM_INTERACTIONS	rs10849451	12	6415513	VAMP1	rs1531545	5	52897456	ITGA1	dominant	0.534855	0.558676	1.51879	0.908332	protective	NA
KEGG_SNARE_INTERACTIONS_IN_VESICULAR_TRANSPORT	REACTOME_L1CAM_INTERACTIONS	rs2551799	17	9297594	STX8	rs1155741	3	37585621	ITGA9	dominant	0.372116	0.395436	1.51722	0.906077	protective	NA
KEGG_SNARE_INTERACTIONS_IN_VESICULAR_TRANSPORT	REACTOME_L1CAM_INTERACTIONS	rs2236359	1	227747743	SNAP47	rs11604757	11	1029320	AP2A2	dominant	0.137161	0.155466	1.51501	0.863541	protective	NA
KEGG_SNARE_INTERACTIONS_IN_VESICULAR_TRANSPORT	REACTOME_L1CAM_INTERACTIONS	rs3027232	17	8118747	VAMP2	rs10956647	8	132190597	KCNQ3	dominant	0.185557	0.204865	1.51442	0.88428	protective	NA
KEGG_SNARE_INTERACTIONS_IN_VESICULAR_TRANSPORT	REACTOME_L1CAM_INTERACTIONS	rs1078004	2	85542588	VAMP5/VAMP8	rs2298771	2	166036278	SCN1A	dominant	0.381394	0.407472	1.51292	0.896542	protective	NA
KEGG_SNARE_INTERACTIONS_IN_VESICULAR_TRANSPORT	REACTOME_L1CAM_INTERACTIONS	rs4908482	1	7817428	VAMP3	rs1531545	5	52897456	ITGA1	dominant	0.425276	0.448596	1.5084	0.909549	protective	NA
KEGG_SNARE_INTERACTIONS_IN_VESICULAR_TRANSPORT	REACTOME_L1CAM_INTERACTIONS	rs11583530	1	171708037	VAMP4	rs28568406	1	158717373	SPTA1	dominant	0.316951	0.342026	1.50612	0.892667	protective	NA
KEGG_SNARE_INTERACTIONS_IN_VESICULAR_TRANSPORT	REACTOME_L1CAM_INTERACTIONS	rs2286845	7	93994146	BET1	rs12019224	3	37473850	ITGA9	dominant	0.342026	0.366098	1.50425	0.900067	protective	NA
KEGG_SNARE_INTERACTIONS_IN_VESICULAR_TRANSPORT	REACTOME_L1CAM_INTERACTIONS	rs10100935	8	142344359	TSNARE1	rs303819	12	51821318	SCN8A	dominant	0.138415	0.155466	1.50321	0.872703	protective	NA
KEGG_SNARE_INTERACTIONS_IN_VESICULAR_TRANSPORT	REACTOME_L1CAM_INTERACTIONS	rs2236359	1	227747743	SNAP47	rs197770	3	37474336	ITGA9	dominant	0.16675	0.186058	1.49849	0.875459	protective	NA
KEGG_SNARE_INTERACTIONS_IN_VESICULAR_TRANSPORT	REACTOME_L1CAM_INTERACTIONS	rs2551799	17	9297594	STX8	rs1801475	20	63406924	KCNQ2	dominant	0.361083	0.384152	1.49699	0.906009	protective	NA
KEGG_SNARE_INTERACTIONS_IN_VESICULAR_TRANSPORT	REACTOME_L1CAM_INTERACTIONS	rs10100935	8	142344359	TSNARE1	rs11071896	15	66528912	MAP2K1	dominant	0.254012	0.276078	1.49158	0.892857	protective	NA
KEGG_SNARE_INTERACTIONS_IN_VESICULAR_TRANSPORT	REACTOME_L1CAM_INTERACTIONS	rs2286845	7	93994146	BET1	rs11129795	3	38547672	SCN5A	dominant	0.230692	0.252758	1.49066	0.886519	protective	NA
KEGG_SNARE_INTERACTIONS_IN_VESICULAR_TRANSPORT	REACTOME_L1CAM_INTERACTIONS	rs1078004	2	85542588	VAMP5/VAMP8	rs2977852	8	41631133	ANK1	dominant	0.490722	0.517302	1.49053	0.899109	protective	NA
KEGG_SNARE_INTERACTIONS_IN_VESICULAR_TRANSPORT	REACTOME_L1CAM_INTERACTIONS	rs6026468	20	58715291	STX16	rs3816533	15	41841899	SPTBN5	dominant	0.164243	0.182046	1.4902	0.882985	protective	NA
KEGG_SNARE_INTERACTIONS_IN_VESICULAR_TRANSPORT	REACTOME_L1CAM_INTERACTIONS	rs3027232	17	8118747	VAMP2	rs71377306	17	47347921	ITGB3	dominant	0.0320963	0.0433801	1.48549	0.731259	protective	NA
KEGG_SNARE_INTERACTIONS_IN_VESICULAR_TRANSPORT	REACTOME_L1CAM_INTERACTIONS	rs3795504	1	180936312	STX6	rs10956647	8	132190597	KCNQ3	dominant	0.345286	0.368857	1.48087	0.902397	protective	NA
KEGG_SNARE_INTERACTIONS_IN_VESICULAR_TRANSPORT	REACTOME_L1CAM_INTERACTIONS	rs11583530	1	171708037	VAMP4	rs10956647	8	132190597	KCNQ3	dominant	0.252508	0.274574	1.48072	0.892487	protective	NA
KEGG_SNARE_INTERACTIONS_IN_VESICULAR_TRANSPORT	REACTOME_L1CAM_INTERACTIONS	rs10521157	17	9433053	STX8	rs10956647	8	132190597	KCNQ3	dominant	0.202608	0.222166	1.48069	0.889595	protective	NA
KEGG_SNARE_INTERACTIONS_IN_VESICULAR_TRANSPORT	REACTOME_L1CAM_INTERACTIONS	rs10902112	11	244106	BET1L	rs10810812	9	17586103	SH3GL2	dominant	0.284604	0.309178	1.4777	0.888899	protective	NA
KEGG_SNARE_INTERACTIONS_IN_VESICULAR_TRANSPORT	REACTOME_L1CAM_INTERACTIONS	rs10521157	17	9433053	STX8	rs71377306	17	47347921	ITGB3	dominant	0.0393681	0.0514042	1.46712	0.756258	protective	NA
KEGG_SNARE_INTERACTIONS_IN_VESICULAR_TRANSPORT	REACTOME_L1CAM_INTERACTIONS	rs2551799	17	9297594	STX8	rs723077	11	113323446	NCAM1	dominant	0.466148	0.489468	1.46657	0.910755	protective	NA
KEGG_SNARE_INTERACTIONS_IN_VESICULAR_TRANSPORT	REACTOME_L1CAM_INTERACTIONS	rs2551799	17	9297594	STX8	rs2283125	9	133727220	VAV2	dominant	0.314945	0.337262	1.46565	0.903408	protective	NA
KEGG_SNARE_INTERACTIONS_IN_VESICULAR_TRANSPORT	REACTOME_L1CAM_INTERACTIONS	rs25680	12	6445462	VAMP1	rs9841329	3	38646312	SCN5A	dominant	0.265547	0.289117	1.46488	0.888997	protective	NA
KEGG_SNARE_INTERACTIONS_IN_VESICULAR_TRANSPORT	REACTOME_L1CAM_INTERACTIONS	rs6026468	20	58715291	STX16	rs3018474	11	77504355	PAK1	dominant	0.412738	0.434804	1.4643	0.913582	protective	NA
KEGG_SNARE_INTERACTIONS_IN_VESICULAR_TRANSPORT	REACTOME_L1CAM_INTERACTIONS	rs3757840	7	44191617	YKT6	rs11071896	15	66528912	MAP2K1	dominant	0.332497	0.355567	1.45915	0.902802	protective	NA
KEGG_SNARE_INTERACTIONS_IN_VESICULAR_TRANSPORT	REACTOME_L1CAM_INTERACTIONS	rs4908482	1	7817428	VAMP3	rs2300014	7	108297798	NRCAM	dominant	0.397693	0.420512	1.45833	0.909907	protective	NA
KEGG_SNARE_INTERACTIONS_IN_VESICULAR_TRANSPORT	REACTOME_L1CAM_INTERACTIONS	rs10462024	17	8148321	VAMP2	rs7694725	4	113079800	ANK2	dominant	0.210632	0.232197	1.45673	0.882346	protective	NA
KEGG_SNARE_INTERACTIONS_IN_VESICULAR_TRANSPORT	REACTOME_L1CAM_INTERACTIONS	rs3027232	17	8118747	VAMP2	rs314253	17	7188331	DLG4	dominant	0.201103	0.219659	1.4538	0.894261	protective	NA
KEGG_SNARE_INTERACTIONS_IN_VESICULAR_TRANSPORT	REACTOME_L1CAM_INTERACTIONS	rs4908482	1	7817428	VAMP3	rs12961939	18	6997819	LAMA1	dominant	0.268305	0.289619	1.4524	0.899421	protective	NA
KEGG_SNARE_INTERACTIONS_IN_VESICULAR_TRANSPORT	REACTOME_L1CAM_INTERACTIONS	rs10521157	17	9433053	STX8	rs2403730	8	132079891	KCNQ3	dominant	0.222417	0.241474	1.45149	0.898506	protective	NA
KEGG_SNARE_INTERACTIONS_IN_VESICULAR_TRANSPORT	REACTOME_L1CAM_INTERACTIONS	rs2286845	7	93994146	BET1	rs2977852	8	41631133	ANK1	dominant	0.415998	0.440321	1.44639	0.905413	protective	NA
KEGG_SNARE_INTERACTIONS_IN_VESICULAR_TRANSPORT	REACTOME_L1CAM_INTERACTIONS	rs11583530	1	171708037	VAMP4	rs3922844	3	38582762	SCN5A	dominant	0.264293	0.286359	1.4456	0.89526	protective	NA
KEGG_SNARE_INTERACTIONS_IN_VESICULAR_TRANSPORT	REACTOME_L1CAM_INTERACTIONS	rs4908482	1	7817428	VAMP3	rs62107586	19	6468320	TUBB4A	dominant	0.377884	0.400451	1.44178	0.909413	protective	NA
KEGG_SNARE_INTERACTIONS_IN_VESICULAR_TRANSPORT	REACTOME_L1CAM_INTERACTIONS	rs2551799	17	9297594	STX8	rs17346452	1	172084147	DNM3	dominant	0.292377	0.314193	1.44162	0.901878	protective	NA
KEGG_SNARE_INTERACTIONS_IN_VESICULAR_TRANSPORT	REACTOME_L1CAM_INTERACTIONS	rs1411478	1	180993146	STX6	rs20559	1	183130425	LAMC1	dominant	0.0631896	0.0759779	1.44103	0.82033	protective	NA
KEGG_SNARE_INTERACTIONS_IN_VESICULAR_TRANSPORT	REACTOME_L1CAM_INTERACTIONS	rs2551799	17	9297594	STX8	rs10956647	8	132190597	KCNQ3	dominant	0.310181	0.332247	1.44071	0.903721	protective	NA
KEGG_SNARE_INTERACTIONS_IN_VESICULAR_TRANSPORT	REACTOME_L1CAM_INTERACTIONS	rs1078004	2	85542588	VAMP5/VAMP8	rs1978973	3	105622370	ALCAM	dominant	0.103811	0.122618	1.43969	0.828859	protective	NA
KEGG_SNARE_INTERACTIONS_IN_VESICULAR_TRANSPORT	REACTOME_L1CAM_INTERACTIONS	rs2551799	17	9297594	STX8	rs2721876	8	132515828	KCNQ3	dominant	0.330742	0.353059	1.43963	0.905552	protective	NA
KEGG_SNARE_INTERACTIONS_IN_VESICULAR_TRANSPORT	REACTOME_L1CAM_INTERACTIONS	rs10100935	8	142344359	TSNARE1	rs62107586	19	6468320	TUBB4A	dominant	0.36008	0.382648	1.43866	0.907836	protective	NA
KEGG_SNARE_INTERACTIONS_IN_VESICULAR_TRANSPORT	REACTOME_L1CAM_INTERACTIONS	rs28494095	7	73683390	STX1A	rs12357206	10	60030625	ANK3	dominant	0.101053	0.115095	1.43573	0.864281	protective	NA
KEGG_SNARE_INTERACTIONS_IN_VESICULAR_TRANSPORT	REACTOME_L1CAM_INTERACTIONS	rs891203	19	17227073	USE1	rs13164431	5	52868086	ITGA1	dominant	0.138917	0.156219	1.4342	0.871378	protective	NA
KEGG_SNARE_INTERACTIONS_IN_VESICULAR_TRANSPORT	REACTOME_L1CAM_INTERACTIONS	rs3027232	17	8118747	VAMP2	rs1201689	15	41813720	SPTBN5	dominant	0.230943	0.252508	1.43388	0.888952	protective	NA
KEGG_SNARE_INTERACTIONS_IN_VESICULAR_TRANSPORT	REACTOME_L1CAM_INTERACTIONS	rs6026468	20	58715291	STX16	rs62107586	19	6468320	TUBB4A	dominant	0.411735	0.434052	1.43324	0.912598	protective	NA
KEGG_SNARE_INTERACTIONS_IN_VESICULAR_TRANSPORT	REACTOME_L1CAM_INTERACTIONS	rs72878024	11	199492	BET1L	rs1627354	7	108037539	LAMB1	dominant	0.0110331	0.0168004	1.42771	0.652887	protective	NA
KEGG_SNARE_INTERACTIONS_IN_VESICULAR_TRANSPORT	REACTOME_L1CAM_INTERACTIONS	rs7024419	9	99862214	STX17	rs10510181	3	149364	CHL1	dominant	0.340522	0.363842	1.42283	0.902811	protective	NA
KEGG_SNARE_INTERACTIONS_IN_VESICULAR_TRANSPORT	REACTOME_L1CAM_INTERACTIONS	rs1078004	2	85542588	VAMP5/VAMP8	rs303819	12	51821318	SCN8A	dominant	0.173019	0.194584	1.42245	0.865989	protective	NA
KEGG_SNARE_INTERACTIONS_IN_VESICULAR_TRANSPORT	REACTOME_L1CAM_INTERACTIONS	rs3757840	7	44191617	YKT6	rs607230	18	6980524	LAMA1	dominant	0.346289	0.368104	1.41831	0.909342	protective	NA
KEGG_SNARE_INTERACTIONS_IN_VESICULAR_TRANSPORT	REACTOME_L1CAM_INTERACTIONS	rs4908482	1	7817428	VAMP3	rs12357206	10	60030625	ANK3	dominant	0.424524	0.447091	1.4115	0.912287	protective	NA
KEGG_SNARE_INTERACTIONS_IN_VESICULAR_TRANSPORT	REACTOME_L1CAM_INTERACTIONS	rs2286845	7	93994146	BET1	rs10875943	12	49282227	TUBA1C	dominant	0.281344	0.303912	1.41038	0.896672	protective	NA
KEGG_SNARE_INTERACTIONS_IN_VESICULAR_TRANSPORT	REACTOME_L1CAM_INTERACTIONS	rs2908290	7	44176538	YKT6	rs41273499	1	158562824	SPTA1	dominant	0.0814945	0.0955366	1.41004	0.839977	protective	NA
KEGG_SNARE_INTERACTIONS_IN_VESICULAR_TRANSPORT	REACTOME_L1CAM_INTERACTIONS	rs11583530	1	171708037	VAMP4	rs11979158	7	55091656	EGFR	dominant	0.131394	0.149448	1.40677	0.86092	protective	NA
KEGG_SNARE_INTERACTIONS_IN_VESICULAR_TRANSPORT	REACTOME_L1CAM_INTERACTIONS	rs2236359	1	227747743	SNAP47	rs41273499	1	158562824	SPTA1	dominant	0.0865095	0.101805	1.40459	0.835525	protective	NA
KEGG_SNARE_INTERACTIONS_IN_VESICULAR_TRANSPORT	REACTOME_L1CAM_INTERACTIONS	rs1545620	19	17192965	USE1	rs353116	2	165277122	SCN2A	dominant	0.393932	0.420512	1.40382	0.895708	protective	NA
KEGG_SNARE_INTERACTIONS_IN_VESICULAR_TRANSPORT	REACTOME_L1CAM_INTERACTIONS	rs10521157	17	9433053	STX8	rs694739	11	64329761	RPS6KA4	dominant	0.242477	0.267803	1.40303	0.87516	protective	NA
KEGG_SNARE_INTERACTIONS_IN_VESICULAR_TRANSPORT	REACTOME_L1CAM_INTERACTIONS	rs1078004	2	85542588	VAMP5/VAMP8	rs62244081	3	38771518	SCN10A	dominant	0.297392	0.321715	1.40291	0.892395	protective	NA
KEGG_SNARE_INTERACTIONS_IN_VESICULAR_TRANSPORT	REACTOME_L1CAM_INTERACTIONS	rs2551799	17	9297594	STX8	rs10810812	9	17586103	SH3GL2	dominant	0.395687	0.421264	1.40224	0.899532	protective	NA
KEGG_SNARE_INTERACTIONS_IN_VESICULAR_TRANSPORT	REACTOME_L1CAM_INTERACTIONS	rs7024419	9	99862214	STX17	rs10810812	9	17586103	SH3GL2	dominant	0.396941	0.422518	1.40037	0.899622	protective	NA
KEGG_SNARE_INTERACTIONS_IN_VESICULAR_TRANSPORT	REACTOME_L1CAM_INTERACTIONS	rs1078004	2	85542588	VAMP5/VAMP8	rs2303361	7	6409865	RAC1	dominant	0.256269	0.27984	1.40027	0.886748	protective	NA
KEGG_SNARE_INTERACTIONS_IN_VESICULAR_TRANSPORT	REACTOME_L1CAM_INTERACTIONS	rs3757840	7	44191617	YKT6	rs314253	17	7188331	DLG4	dominant	0.395938	0.418004	1.3997	0.912609	protective	NA
KEGG_SNARE_INTERACTIONS_IN_VESICULAR_TRANSPORT	REACTOME_L1CAM_INTERACTIONS	rs2551799	17	9297594	STX8	rs3816533	15	41841899	SPTBN5	dominant	0.15672	0.175025	1.39732	0.875979	protective	NA
KEGG_SNARE_INTERACTIONS_IN_VESICULAR_TRANSPORT	REACTOME_L1CAM_INTERACTIONS	rs2236359	1	227747743	SNAP47	rs6066384	20	37443196	SRC	dominant	0.441825	0.464644	1.39542	0.912018	protective	NA
KEGG_SNARE_INTERACTIONS_IN_VESICULAR_TRANSPORT	REACTOME_L1CAM_INTERACTIONS	rs11583530	1	171708037	VAMP4	rs12939821	17	64001926	SCN4A	dominant	0.338014	0.360832	1.39493	0.904472	protective	NA
KEGG_SNARE_INTERACTIONS_IN_VESICULAR_TRANSPORT	REACTOME_L1CAM_INTERACTIONS	rs2286845	7	93994146	BET1	rs12205572	6	166365976	RPS6KA2	dominant	0.0594283	0.0737212	1.39211	0.793873	protective	NA
KEGG_SNARE_INTERACTIONS_IN_VESICULAR_TRANSPORT	REACTOME_L1CAM_INTERACTIONS	rs891203	19	17227073	USE1	rs3827496	3	115622053	GAP43	dominant	0.15321	0.170762	1.39181	0.878612	protective	NA
KEGG_SNARE_INTERACTIONS_IN_VESICULAR_TRANSPORT	REACTOME_L1CAM_INTERACTIONS	rs3027232	17	8118747	VAMP2	rs303819	12	51821318	SCN8A	dominant	0.0885155	0.102808	1.38945	0.847475	protective	NA
KEGG_SNARE_INTERACTIONS_IN_VESICULAR_TRANSPORT	REACTOME_L1CAM_INTERACTIONS	rs2532500	12	6453644	VAMP1	rs694739	11	64329761	RPS6KA4	dominant	0.305416	0.331996	1.38814	0.884736	protective	NA
KEGG_SNARE_INTERACTIONS_IN_VESICULAR_TRANSPORT	REACTOME_L1CAM_INTERACTIONS	rs25680	12	6445462	VAMP1	rs11888208	2	166456941	SCN7A	dominant	0.100552	0.118104	1.38734	0.834765	protective	NA
KEGG_SNARE_INTERACTIONS_IN_VESICULAR_TRANSPORT	REACTOME_L1CAM_INTERACTIONS	rs718097	17	9212088	STX8	rs3816533	15	41841899	SPTBN5	dominant	0.185306	0.203109	1.3872	0.892408	protective	NA
KEGG_SNARE_INTERACTIONS_IN_VESICULAR_TRANSPORT	REACTOME_L1CAM_INTERACTIONS	rs2286845	7	93994146	BET1	rs34083785	8	132513765	KCNQ3	dominant	0.325978	0.349047	1.38634	0.901944	protective	NA
KEGG_SNARE_INTERACTIONS_IN_VESICULAR_TRANSPORT	REACTOME_L1CAM_INTERACTIONS	rs10521157	17	9433053	STX8	rs20559	1	183130425	LAMC1	dominant	0.0418756	0.0529087	1.3857	0.782355	protective	NA
KEGG_SNARE_INTERACTIONS_IN_VESICULAR_TRANSPORT	REACTOME_L1CAM_INTERACTIONS	rs10462024	17	8148321	VAMP2	rs1978973	3	105622370	ALCAM	dominant	0.0967904	0.112337	1.38361	0.846777	protective	NA
KEGG_SNARE_INTERACTIONS_IN_VESICULAR_TRANSPORT	REACTOME_L1CAM_INTERACTIONS	rs6026468	20	58715291	STX16	rs11071896	15	66528912	MAP2K1	dominant	0.294634	0.3167	1.38335	0.901221	protective	NA
KEGG_SNARE_INTERACTIONS_IN_VESICULAR_TRANSPORT	REACTOME_L1CAM_INTERACTIONS	rs25680	12	6445462	VAMP1	rs2776937	10	33317261	NRP1	dominant	0.163741	0.184052	1.38287	0.868038	protective	NA
KEGG_SNARE_INTERACTIONS_IN_VESICULAR_TRANSPORT	REACTOME_L1CAM_INTERACTIONS	rs2551799	17	9297594	STX8	rs286592	5	154996537	KIF4B	dominant	0.349298	0.371364	1.38083	0.908684	protective	NA
KEGG_SNARE_INTERACTIONS_IN_VESICULAR_TRANSPORT	REACTOME_L1CAM_INTERACTIONS	rs1545620	19	17192965	USE1	rs11979158	7	55091656	EGFR	dominant	0.164493	0.182548	1.38035	0.881627	protective	NA
KEGG_SNARE_INTERACTIONS_IN_VESICULAR_TRANSPORT	REACTOME_L1CAM_INTERACTIONS	rs10462024	17	8148321	VAMP2	rs62587579	9	137216103	TUBB4B	dominant	0.05667	0.0674524	1.38008	0.830546	protective	NA
KEGG_SNARE_INTERACTIONS_IN_VESICULAR_TRANSPORT	REACTOME_L1CAM_INTERACTIONS	rs10521157	17	9433053	STX8	rs11979158	7	55091656	EGFR	dominant	0.105316	0.120361	1.37822	0.860286	protective	NA
KEGG_SNARE_INTERACTIONS_IN_VESICULAR_TRANSPORT	REACTOME_L1CAM_INTERACTIONS	rs2286845	7	93994146	BET1	rs6018027	20	37362389	SRC	dominant	0.265547	0.287613	1.37698	0.895539	protective	NA
KEGG_SNARE_INTERACTIONS_IN_VESICULAR_TRANSPORT	REACTOME_L1CAM_INTERACTIONS	rs3757840	7	44191617	YKT6	rs2521988	17	7252542	DLG4	dominant	0.177031	0.195336	1.37581	0.886132	protective	NA
KEGG_SNARE_INTERACTIONS_IN_VESICULAR_TRANSPORT	REACTOME_L1CAM_INTERACTIONS	rs10100935	8	142344359	TSNARE1	rs20559	1	183130425	LAMC1	dominant	0.0551655	0.0672016	1.37539	0.810438	protective	NA
KEGG_SNARE_INTERACTIONS_IN_VESICULAR_TRANSPORT	REACTOME_L1CAM_INTERACTIONS	rs10521157	17	9433053	STX8	rs2227983	7	55161562	EGFR	dominant	0.183801	0.201856	1.37428	0.890418	protective	NA
KEGG_SNARE_INTERACTIONS_IN_VESICULAR_TRANSPORT	REACTOME_L1CAM_INTERACTIONS	rs891203	19	17227073	USE1	rs62107586	19	6468320	TUBB4A	dominant	0.1334	0.150201	1.37217	0.870929	protective	NA
KEGG_SNARE_INTERACTIONS_IN_VESICULAR_TRANSPORT	REACTOME_L1CAM_INTERACTIONS	rs891203	19	17227073	USE1	rs267561	3	37533460	ITGA9	dominant	0.140923	0.157974	1.36988	0.874358	protective	NA
KEGG_SNARE_INTERACTIONS_IN_VESICULAR_TRANSPORT	REACTOME_L1CAM_INTERACTIONS	rs10849451	12	6415513	VAMP1	rs3759786	15	66337065	MAP2K1	dominant	0.1833	0.201103	1.36894	0.891602	protective	NA
KEGG_SNARE_INTERACTIONS_IN_VESICULAR_TRANSPORT	REACTOME_L1CAM_INTERACTIONS	rs3757840	7	44191617	YKT6	rs1978973	3	105622370	ALCAM	dominant	0.109077	0.125125	1.36299	0.856041	protective	NA
KEGG_SNARE_INTERACTIONS_IN_VESICULAR_TRANSPORT	REACTOME_L1CAM_INTERACTIONS	rs25680	12	6445462	VAMP1	rs11549015	15	41943118	SPTBN5	dominant	0.117352	0.135657	1.36283	0.847124	protective	NA
KEGG_SNARE_INTERACTIONS_IN_VESICULAR_TRANSPORT	REACTOME_L1CAM_INTERACTIONS	rs2236359	1	227747743	SNAP47	rs2293079	2	219236065	TUBA4A/TUBA4B	dominant	0.155717	0.175777	1.3613	0.864829	protective	NA
KEGG_SNARE_INTERACTIONS_IN_VESICULAR_TRANSPORT	REACTOME_L1CAM_INTERACTIONS	rs891203	19	17227073	USE1	rs382140	7	108141755	NRCAM	dominant	0.0702106	0.0845035	1.36085	0.818088	protective	NA
KEGG_SNARE_INTERACTIONS_IN_VESICULAR_TRANSPORT	REACTOME_L1CAM_INTERACTIONS	rs718097	17	9212088	STX8	rs10810812	9	17586103	SH3GL2	dominant	0.459629	0.485456	1.3601	0.901545	protective	NA
KEGG_SNARE_INTERACTIONS_IN_VESICULAR_TRANSPORT	REACTOME_L1CAM_INTERACTIONS	rs2551799	17	9297594	STX8	rs9347144	6	166665623	RPS6KA2	dominant	0.393932	0.417001	1.36002	0.90872	protective	NA
KEGG_SNARE_INTERACTIONS_IN_VESICULAR_TRANSPORT	REACTOME_L1CAM_INTERACTIONS	rs2236359	1	227747743	SNAP47	rs3922844	3	38582762	SCN5A	dominant	0.336008	0.357823	1.35745	0.908181	protective	NA
KEGG_SNARE_INTERACTIONS_IN_VESICULAR_TRANSPORT	REACTOME_L1CAM_INTERACTIONS	rs718097	17	9212088	STX8	rs2283125	9	133727220	VAV2	dominant	0.375878	0.401454	1.35656	0.89792	protective	NA
KEGG_SNARE_INTERACTIONS_IN_VESICULAR_TRANSPORT	REACTOME_L1CAM_INTERACTIONS	rs3757840	7	44191617	YKT6	rs1531545	5	52897456	ITGA1	dominant	0.532347	0.554162	1.35442	0.915821	protective	NA
KEGG_SNARE_INTERACTIONS_IN_VESICULAR_TRANSPORT	REACTOME_L1CAM_INTERACTIONS	rs11583530	1	171708037	VAMP4	rs6699312	1	171836182	DNM3	dominant	0.39995	0.423019	1.3482	0.909116	protective	NA
KEGG_SNARE_INTERACTIONS_IN_VESICULAR_TRANSPORT	REACTOME_L1CAM_INTERACTIONS	rs11583530	1	171708037	VAMP4	rs2058194	17	63942988	SCN4A	dominant	0.344283	0.366851	1.34767	0.906183	protective	NA
KEGG_SNARE_INTERACTIONS_IN_VESICULAR_TRANSPORT	REACTOME_L1CAM_INTERACTIONS	rs6026468	20	58715291	STX16	rs7694725	4	113079800	ANK2	dominant	0.205868	0.22668	1.33899	0.884384	protective	NA
KEGG_SNARE_INTERACTIONS_IN_VESICULAR_TRANSPORT	REACTOME_L1CAM_INTERACTIONS	rs10521157	17	9433053	STX8	rs1380453	10	60274597	ANK3	dominant	0.301404	0.323972	1.33759	0.900286	protective	NA
KEGG_SNARE_INTERACTIONS_IN_VESICULAR_TRANSPORT	REACTOME_L1CAM_INTERACTIONS	rs28494095	7	73683390	STX1A	rs29302	4	113303436	ANK2	dominant	0.0937813	0.107071	1.33527	0.863033	protective	NA
KEGG_SNARE_INTERACTIONS_IN_VESICULAR_TRANSPORT	REACTOME_L1CAM_INTERACTIONS	rs1128349	7	73683324	STX1A	rs62107586	19	6468320	TUBB4A	dominant	0.437312	0.459629	1.33521	0.91371	protective	NA
KEGG_SNARE_INTERACTIONS_IN_VESICULAR_TRANSPORT	REACTOME_L1CAM_INTERACTIONS	rs2551799	17	9297594	STX8	rs11599164	10	60072226	ANK3	dominant	0.12011	0.13666	1.33452	0.862368	protective	NA
KEGG_SNARE_INTERACTIONS_IN_VESICULAR_TRANSPORT	REACTOME_L1CAM_INTERACTIONS	rs1078004	2	85542588	VAMP5/VAMP8	rs11979158	7	55091656	EGFR	dominant	0.18004	0.201354	1.33307	0.870905	protective	NA
KEGG_SNARE_INTERACTIONS_IN_VESICULAR_TRANSPORT	REACTOME_L1CAM_INTERACTIONS	rs1078004	2	85542588	VAMP5/VAMP8	rs6066384	20	37443196	SRC	dominant	0.485206	0.510782	1.3323	0.902731	protective	NA
KEGG_SNARE_INTERACTIONS_IN_VESICULAR_TRANSPORT	REACTOME_L1CAM_INTERACTIONS	rs6026468	20	58715291	STX16	rs6764363	3	270666	CHL1	dominant	0.381896	0.40346	1.33205	0.913527	protective	NA
KEGG_SNARE_INTERACTIONS_IN_VESICULAR_TRANSPORT	REACTOME_L1CAM_INTERACTIONS	rs11246020	11	233067	BET1L	rs71377306	17	47347921	ITGB3	dominant	0.0356068	0.0468907	1.33166	0.750473	protective	NA
KEGG_SNARE_INTERACTIONS_IN_VESICULAR_TRANSPORT	REACTOME_L1CAM_INTERACTIONS	rs3795504	1	180936312	STX6	rs286592	5	154996537	KIF4B	dominant	0.387412	0.411986	1.33035	0.902631	protective	NA
KEGG_SNARE_INTERACTIONS_IN_VESICULAR_TRANSPORT	REACTOME_L1CAM_INTERACTIONS	rs2532500	12	6453644	VAMP1	rs3759786	15	66337065	MAP2K1	dominant	0.13666	0.153962	1.32808	0.869834	protective	NA
KEGG_SNARE_INTERACTIONS_IN_VESICULAR_TRANSPORT	REACTOME_L1CAM_INTERACTIONS	rs10462024	17	8148321	VAMP2	rs2283125	9	133727220	VAV2	dominant	0.324975	0.345035	1.32704	0.913871	protective	NA
KEGG_SNARE_INTERACTIONS_IN_VESICULAR_TRANSPORT	REACTOME_L1CAM_INTERACTIONS	rs25680	12	6445462	VAMP1	rs2233701	8	26508200	DPYSL2	dominant	0.0722166	0.0877633	1.32547	0.809069	protective	NA
KEGG_SNARE_INTERACTIONS_IN_VESICULAR_TRANSPORT	REACTOME_L1CAM_INTERACTIONS	rs718097	17	9212088	STX8	rs41273499	1	158562824	SPTA1	dominant	0.0995486	0.114092	1.32453	0.858435	protective	NA
KEGG_SNARE_INTERACTIONS_IN_VESICULAR_TRANSPORT	REACTOME_L1CAM_INTERACTIONS	rs25680	12	6445462	VAMP1	rs34282046	19	19194090	NCAN	dominant	0.0358576	0.0481444	1.32447	0.7353	protective	NA
KEGG_SNARE_INTERACTIONS_IN_VESICULAR_TRANSPORT	REACTOME_L1CAM_INTERACTIONS	rs3795504	1	180936312	STX6	rs11979158	7	55091656	EGFR	dominant	0.184554	0.201856	1.32369	0.894887	protective	NA
KEGG_SNARE_INTERACTIONS_IN_VESICULAR_TRANSPORT	REACTOME_L1CAM_INTERACTIONS	rs10100935	8	142344359	TSNARE1	rs694739	11	64329761	RPS6KA4	dominant	0.325476	0.352056	1.3228	0.888071	protective	NA
KEGG_SNARE_INTERACTIONS_IN_VESICULAR_TRANSPORT	REACTOME_L1CAM_INTERACTIONS	rs25680	12	6445462	VAMP1	rs17519184	18	6986715	LAMA1	dominant	0.224173	0.245988	1.32268	0.88569	protective	NA
KEGG_SNARE_INTERACTIONS_IN_VESICULAR_TRANSPORT	REACTOME_L1CAM_INTERACTIONS	rs3757840	7	44191617	YKT6	rs12019224	3	37473850	ITGA9	dominant	0.428034	0.449599	1.32173	0.916141	protective	NA
KEGG_SNARE_INTERACTIONS_IN_VESICULAR_TRANSPORT	REACTOME_L1CAM_INTERACTIONS	rs3795504	1	180936312	STX6	rs62107586	19	6468320	TUBB4A	dominant	0.449348	0.470913	1.32094	0.916838	protective	NA
KEGG_SNARE_INTERACTIONS_IN_VESICULAR_TRANSPORT	REACTOME_L1CAM_INTERACTIONS	rs11583530	1	171708037	VAMP4	rs7616103	3	105586965	ALCAM	dominant	0.339017	0.361334	1.31929	0.906559	protective	NA
KEGG_SNARE_INTERACTIONS_IN_VESICULAR_TRANSPORT	REACTOME_L1CAM_INTERACTIONS	rs6026468	20	58715291	STX16	rs177389	14	73260801	NUMB	dominant	0.453611	0.474423	1.31926	0.919711	protective	NA
KEGG_SNARE_INTERACTIONS_IN_VESICULAR_TRANSPORT	REACTOME_L1CAM_INTERACTIONS	rs11583530	1	171708037	VAMP4	rs280371	12	41114842	CNTN1	dominant	0.0885155	0.104062	1.31825	0.836094	protective	NA
KEGG_SNARE_INTERACTIONS_IN_VESICULAR_TRANSPORT	REACTOME_L1CAM_INTERACTIONS	rs891203	19	17227073	USE1	rs7694725	4	113079800	ANK2	dominant	0.0654463	0.07999	1.31453	0.805449	protective	NA
KEGG_SNARE_INTERACTIONS_IN_VESICULAR_TRANSPORT	REACTOME_L1CAM_INTERACTIONS	rs4908482	1	7817428	VAMP3	rs3826408	17	7197973	DLG4	dominant	0.416499	0.440321	1.3142	0.907283	protective	NA
KEGG_SNARE_INTERACTIONS_IN_VESICULAR_TRANSPORT	REACTOME_L1CAM_INTERACTIONS	rs10849451	12	6415513	VAMP1	rs3018474	11	77504355	PAK1	dominant	0.481695	0.502508	1.3138	0.920091	protective	NA
KEGG_SNARE_INTERACTIONS_IN_VESICULAR_TRANSPORT	REACTOME_L1CAM_INTERACTIONS	rs10462024	17	8148321	VAMP2	rs353116	2	165277122	SCN2A	dominant	0.39669	0.422768	1.31343	0.897757	protective	NA
KEGG_SNARE_INTERACTIONS_IN_VESICULAR_TRANSPORT	REACTOME_L1CAM_INTERACTIONS	rs12440118	15	42451896	SNAP23	rs11979158	7	55091656	EGFR	dominant	0.0689569	0.0817452	1.31099	0.831972	protective	NA
KEGG_SNARE_INTERACTIONS_IN_VESICULAR_TRANSPORT	REACTOME_L1CAM_INTERACTIONS	rs10849451	12	6415513	VAMP1	rs314253	17	7188331	DLG4	dominant	0.402207	0.423019	1.31009	0.917698	protective	NA
KEGG_SNARE_INTERACTIONS_IN_VESICULAR_TRANSPORT	REACTOME_L1CAM_INTERACTIONS	rs10849451	12	6415513	VAMP1	rs3922844	3	38582762	SCN5A	dominant	0.379137	0.401705	1.3094	0.909513	protective	NA
KEGG_SNARE_INTERACTIONS_IN_VESICULAR_TRANSPORT	REACTOME_L1CAM_INTERACTIONS	rs891203	19	17227073	USE1	rs20556	7	107953544	LAMB1	dominant	0.128134	0.144433	1.30904	0.870568	protective	NA
KEGG_SNARE_INTERACTIONS_IN_VESICULAR_TRANSPORT	REACTOME_L1CAM_INTERACTIONS	rs2908290	7	44176538	YKT6	rs1801106	5	53062927	ITGA2	dominant	0.104062	0.119358	1.30731	0.856964	protective	NA
KEGG_SNARE_INTERACTIONS_IN_VESICULAR_TRANSPORT	REACTOME_L1CAM_INTERACTIONS	rs2286845	7	93994146	BET1	rs6598858	1	26583274	RPS6KA1	dominant	0.407723	0.431043	1.30663	0.908656	protective	NA
KEGG_SNARE_INTERACTIONS_IN_VESICULAR_TRANSPORT	REACTOME_L1CAM_INTERACTIONS	rs2551799	17	9297594	STX8	rs6699312	1	171836182	DNM3	dominant	0.4501	0.472166	1.30541	0.915014	protective	NA
KEGG_SNARE_INTERACTIONS_IN_VESICULAR_TRANSPORT	REACTOME_L1CAM_INTERACTIONS	rs6026468	20	58715291	STX16	rs267561	3	37533460	ITGA9	dominant	0.42653	0.448596	1.30486	0.914225	protective	NA
KEGG_SNARE_INTERACTIONS_IN_VESICULAR_TRANSPORT	REACTOME_L1CAM_INTERACTIONS	rs11583530	1	171708037	VAMP4	rs10893053	11	123610273	SCN3B	dominant	0.260281	0.281344	1.30465	0.898791	protective	NA
KEGG_SNARE_INTERACTIONS_IN_VESICULAR_TRANSPORT	REACTOME_L1CAM_INTERACTIONS	rs11167136	8	142229454	TSNARE1	rs11071896	15	66528912	MAP2K1	dominant	0.313942	0.335757	1.30368	0.905294	protective	NA
KEGG_SNARE_INTERACTIONS_IN_VESICULAR_TRANSPORT	REACTOME_L1CAM_INTERACTIONS	rs4908482	1	7817428	VAMP3	rs2403730	8	132079891	KCNQ3	dominant	0.308425	0.329238	1.30277	0.908594	protective	NA
KEGG_SNARE_INTERACTIONS_IN_VESICULAR_TRANSPORT	REACTOME_L1CAM_INTERACTIONS	rs4908482	1	7817428	VAMP3	rs10956647	8	132190597	KCNQ3	dominant	0.290622	0.311184	1.30157	0.906854	protective	NA
KEGG_SNARE_INTERACTIONS_IN_VESICULAR_TRANSPORT	REACTOME_L1CAM_INTERACTIONS	rs2286845	7	93994146	BET1	rs41273499	1	158562824	SPTA1	dominant	0.082999	0.0985456	1.30018	0.82796	protective	NA
KEGG_SNARE_INTERACTIONS_IN_VESICULAR_TRANSPORT	REACTOME_L1CAM_INTERACTIONS	rs718097	17	9212088	STX8	rs2293079	2	219236065	TUBA4A/TUBA4B	dominant	0.175276	0.195838	1.296	0.872692	protective	NA
KEGG_SNARE_INTERACTIONS_IN_VESICULAR_TRANSPORT	REACTOME_L1CAM_INTERACTIONS	rs891203	19	17227073	USE1	rs2274616	1	145898994	ITGA10	dominant	0.060682	0.0734704	1.29406	0.814694	protective	NA
KEGG_SNARE_INTERACTIONS_IN_VESICULAR_TRANSPORT	REACTOME_L1CAM_INTERACTIONS	rs11583530	1	171708037	VAMP4	rs71377306	17	47347921	ITGB3	dominant	0.0473922	0.0599298	1.29361	0.780387	protective	NA
KEGG_SNARE_INTERACTIONS_IN_VESICULAR_TRANSPORT	REACTOME_L1CAM_INTERACTIONS	rs4908482	1	7817428	VAMP3	rs2228479	16	89919532	TUBB3	dominant	0.0865095	0.101053	1.29336	0.84245	protective	NA
KEGG_SNARE_INTERACTIONS_IN_VESICULAR_TRANSPORT	REACTOME_L1CAM_INTERACTIONS	rs25680	12	6445462	VAMP1	rs3827496	3	115622053	GAP43	dominant	0.285858	0.308927	1.29121	0.895434	protective	NA
KEGG_SNARE_INTERACTIONS_IN_VESICULAR_TRANSPORT	REACTOME_L1CAM_INTERACTIONS	rs10521157	17	9433053	STX8	rs2776937	10	33317261	NRP1	dominant	0.179539	0.195838	1.29079	0.898561	protective	NA
KEGG_SNARE_INTERACTIONS_IN_VESICULAR_TRANSPORT	REACTOME_L1CAM_INTERACTIONS	rs10100935	8	142344359	TSNARE1	rs314253	17	7188331	DLG4	dominant	0.300652	0.322467	1.28977	0.903265	protective	NA
KEGG_SNARE_INTERACTIONS_IN_VESICULAR_TRANSPORT	REACTOME_L1CAM_INTERACTIONS	rs2286845	7	93994146	BET1	rs16915157	10	60586880	ANK3	dominant	0.2001	0.22016	1.28842	0.886091	protective	NA
KEGG_SNARE_INTERACTIONS_IN_VESICULAR_TRANSPORT	REACTOME_L1CAM_INTERACTIONS	rs3027232	17	8118747	VAMP2	rs2721876	8	132515828	KCNQ3	dominant	0.196088	0.212638	1.28814	0.903186	protective	NA
KEGG_SNARE_INTERACTIONS_IN_VESICULAR_TRANSPORT	REACTOME_L1CAM_INTERACTIONS	rs2286845	7	93994146	BET1	rs3813563	14	73492108	NUMB	dominant	0.401204	0.424524	1.28783	0.908263	protective	NA
KEGG_SNARE_INTERACTIONS_IN_VESICULAR_TRANSPORT	REACTOME_L1CAM_INTERACTIONS	rs1195569	12	130740926	STX2	rs28568406	1	158717373	SPTA1	dominant	0.446088	0.471163	1.28733	0.90392	protective	NA
KEGG_SNARE_INTERACTIONS_IN_VESICULAR_TRANSPORT	REACTOME_L1CAM_INTERACTIONS	rs6026468	20	58715291	STX16	rs2233701	8	26508200	DPYSL2	dominant	0.127382	0.142177	1.287	0.880754	protective	NA
KEGG_SNARE_INTERACTIONS_IN_VESICULAR_TRANSPORT	REACTOME_L1CAM_INTERACTIONS	rs718097	17	9212088	STX8	rs28568406	1	158717373	SPTA1	dominant	0.447844	0.472919	1.28503	0.903972	protective	NA
KEGG_SNARE_INTERACTIONS_IN_VESICULAR_TRANSPORT	REACTOME_L1CAM_INTERACTIONS	rs2551799	17	9297594	STX8	rs751024	1	22817501	EPHB2	dominant	0.208124	0.227182	1.28314	0.894068	protective	NA
KEGG_SNARE_INTERACTIONS_IN_VESICULAR_TRANSPORT	REACTOME_L1CAM_INTERACTIONS	rs1195569	12	130740926	STX2	rs2293079	2	219236065	TUBA4A/TUBA4B	dominant	0.177031	0.197593	1.27935	0.873554	protective	NA
KEGG_SNARE_INTERACTIONS_IN_VESICULAR_TRANSPORT	REACTOME_L1CAM_INTERACTIONS	rs6026468	20	58715291	STX16	rs2228479	16	89919532	TUBB3	dominant	0.0937813	0.107071	1.27844	0.863033	protective	NA
KEGG_SNARE_INTERACTIONS_IN_VESICULAR_TRANSPORT	REACTOME_L1CAM_INTERACTIONS	rs2908290	7	44176538	YKT6	rs10956647	8	132190597	KCNQ3	dominant	0.293129	0.312939	1.27839	0.910449	protective	NA
KEGG_SNARE_INTERACTIONS_IN_VESICULAR_TRANSPORT	REACTOME_L1CAM_INTERACTIONS	rs10849451	12	6415513	VAMP1	rs9853984	3	38608689	SCN5A	dominant	0.47317	0.494233	1.27635	0.919105	protective	NA
KEGG_SNARE_INTERACTIONS_IN_VESICULAR_TRANSPORT	REACTOME_L1CAM_INTERACTIONS	rs11583530	1	171708037	VAMP4	rs9853984	3	38608689	SCN5A	dominant	0.322217	0.344032	1.27496	0.906443	protective	NA
KEGG_SNARE_INTERACTIONS_IN_VESICULAR_TRANSPORT	REACTOME_L1CAM_INTERACTIONS	rs10462024	17	8148321	VAMP2	rs34789048	9	36169726	CLTA	dominant	0.0972919	0.111836	1.2749	0.855939	protective	NA
KEGG_SNARE_INTERACTIONS_IN_VESICULAR_TRANSPORT	REACTOME_L1CAM_INTERACTIONS	rs2551799	17	9297594	STX8	rs177389	14	73260801	NUMB	dominant	0.44333	0.465145	1.27488	0.915749	protective	NA
KEGG_SNARE_INTERACTIONS_IN_VESICULAR_TRANSPORT	REACTOME_L1CAM_INTERACTIONS	rs10462024	17	8148321	VAMP2	rs10810812	9	17586103	SH3GL2	dominant	0.400702	0.425527	1.27416	0.902656	protective	NA
KEGG_SNARE_INTERACTIONS_IN_VESICULAR_TRANSPORT	REACTOME_L1CAM_INTERACTIONS	rs11583530	1	171708037	VAMP4	rs12357206	10	60030625	ANK3	dominant	0.371113	0.39343	1.27036	0.909802	protective	NA
KEGG_SNARE_INTERACTIONS_IN_VESICULAR_TRANSPORT	REACTOME_L1CAM_INTERACTIONS	rs4908482	1	7817428	VAMP3	rs267561	3	37533460	ITGA9	dominant	0.38992	0.411234	1.27001	0.915045	protective	NA
KEGG_SNARE_INTERACTIONS_IN_VESICULAR_TRANSPORT	REACTOME_L1CAM_INTERACTIONS	rs25680	12	6445462	VAMP1	rs6066384	20	37443196	SRC	dominant	0.268054	0.290622	1.26965	0.893909	protective	NA
KEGG_SNARE_INTERACTIONS_IN_VESICULAR_TRANSPORT	REACTOME_L1CAM_INTERACTIONS	rs28494095	7	73683390	STX1A	rs2276635	2	219222719	TUBA4A/TUBA4B	dominant	0.025326	0.0330993	1.26834	0.759049	protective	NA
KEGG_SNARE_INTERACTIONS_IN_VESICULAR_TRANSPORT	REACTOME_L1CAM_INTERACTIONS	rs2236359	1	227747743	SNAP47	rs2300014	7	108297798	NRCAM	dominant	0.435807	0.457623	1.26812	0.915505	protective	NA
KEGG_SNARE_INTERACTIONS_IN_VESICULAR_TRANSPORT	REACTOME_L1CAM_INTERACTIONS	rs4908482	1	7817428	VAMP3	rs71377306	17	47347921	ITGB3	dominant	0.0569208	0.0699599	1.26785	0.802371	protective	NA
KEGG_SNARE_INTERACTIONS_IN_VESICULAR_TRANSPORT	REACTOME_L1CAM_INTERACTIONS	rs41278952	1	7737443	VAMP3	rs11888208	2	166456941	SCN7A	dominant	0.0651956	0.0774824	1.26778	0.830364	protective	NA
KEGG_SNARE_INTERACTIONS_IN_VESICULAR_TRANSPORT	REACTOME_L1CAM_INTERACTIONS	rs2908290	7	44176538	YKT6	rs280371	12	41114842	CNTN1	dominant	0.10005	0.113089	1.26759	0.871882	protective	NA
KEGG_SNARE_INTERACTIONS_IN_VESICULAR_TRANSPORT	REACTOME_L1CAM_INTERACTIONS	rs41278952	1	7737443	VAMP3	rs11599164	10	60072226	ANK3	dominant	0.0403711	0.0493982	1.26319	0.809571	protective	NA
KEGG_SNARE_INTERACTIONS_IN_VESICULAR_TRANSPORT	REACTOME_L1CAM_INTERACTIONS	rs3757840	7	44191617	YKT6	rs3827496	3	115622053	GAP43	dominant	0.532598	0.553661	1.26258	0.918607	protective	NA
KEGG_SNARE_INTERACTIONS_IN_VESICULAR_TRANSPORT	REACTOME_L1CAM_INTERACTIONS	rs11583530	1	171708037	VAMP4	rs723077	11	113323446	NCAM1	dominant	0.378636	0.400953	1.26003	0.910423	protective	NA
KEGG_SNARE_INTERACTIONS_IN_VESICULAR_TRANSPORT	REACTOME_L1CAM_INTERACTIONS	rs1356732950	6	132538470	STX7	rs28568406	1	158717373	SPTA1	dominant	0.287613	0.310682	1.25877	0.895768	protective	NA
KEGG_SNARE_INTERACTIONS_IN_VESICULAR_TRANSPORT	REACTOME_L1CAM_INTERACTIONS	rs25680	12	6445462	VAMP1	rs2300014	7	108297798	NRCAM	dominant	0.259779	0.282096	1.25749	0.893125	protective	NA
KEGG_SNARE_INTERACTIONS_IN_VESICULAR_TRANSPORT	REACTOME_L1CAM_INTERACTIONS	rs2286845	7	93994146	BET1	rs3826408	17	7197973	DLG4	dominant	0.421515	0.444584	1.25528	0.910301	protective	NA
KEGG_SNARE_INTERACTIONS_IN_VESICULAR_TRANSPORT	REACTOME_L1CAM_INTERACTIONS	rs1078004	2	85542588	VAMP5/VAMP8	rs4916245	1	172236886	DNM3	dominant	0.483952	0.509027	1.25248	0.904542	protective	NA
KEGG_SNARE_INTERACTIONS_IN_VESICULAR_TRANSPORT	REACTOME_L1CAM_INTERACTIONS	rs4908482	1	7817428	VAMP3	rs9853984	3	38608689	SCN5A	dominant	0.376128	0.397192	1.24925	0.914998	protective	NA
KEGG_SNARE_INTERACTIONS_IN_VESICULAR_TRANSPORT	REACTOME_L1CAM_INTERACTIONS	rs11246020	11	233067	BET1L	rs2721876	8	132515828	KCNQ3	dominant	0.208877	0.227934	1.24875	0.894317	protective	NA
KEGG_SNARE_INTERACTIONS_IN_VESICULAR_TRANSPORT	REACTOME_L1CAM_INTERACTIONS	rs41278952	1	7737443	VAMP3	rs353116	2	165277122	SCN2A	dominant	0.140923	0.161234	1.24641	0.853364	protective	NA
KEGG_SNARE_INTERACTIONS_IN_VESICULAR_TRANSPORT	REACTOME_L1CAM_INTERACTIONS	rs718097	17	9212088	STX8	rs7694725	4	113079800	ANK2	dominant	0.244734	0.266048	1.24358	0.893927	protective	NA
KEGG_SNARE_INTERACTIONS_IN_VESICULAR_TRANSPORT	REACTOME_L1CAM_INTERACTIONS	rs33944211	3	94049424	STX19	rs11604757	11	1029320	AP2A2	dominant	0.0471414	0.058676	1.24242	0.793693	protective	NA
KEGG_SNARE_INTERACTIONS_IN_VESICULAR_TRANSPORT	REACTOME_L1CAM_INTERACTIONS	rs2286845	7	93994146	BET1	rs3922844	3	38582762	SCN5A	dominant	0.306169	0.327984	1.24117	0.904136	protective	NA
KEGG_SNARE_INTERACTIONS_IN_VESICULAR_TRANSPORT	REACTOME_L1CAM_INTERACTIONS	rs25680	12	6445462	VAMP1	rs6764363	3	270666	CHL1	dominant	0.232197	0.253761	1.23898	0.88932	protective	NA
KEGG_SNARE_INTERACTIONS_IN_VESICULAR_TRANSPORT	REACTOME_L1CAM_INTERACTIONS	rs17564	12	130821769	STX2	rs62244081	3	38771518	SCN10A	dominant	0.249749	0.268806	1.23847	0.905504	protective	NA
KEGG_SNARE_INTERACTIONS_IN_VESICULAR_TRANSPORT	REACTOME_L1CAM_INTERACTIONS	rs2286845	7	93994146	BET1	rs2229866	1	205061988	CNTN2/NFASC	dominant	0.327733	0.349799	1.23625	0.906165	protective	NA
KEGG_SNARE_INTERACTIONS_IN_VESICULAR_TRANSPORT	REACTOME_L1CAM_INTERACTIONS	rs9676419	19	17256626	USE1	rs751024	1	22817501	EPHB2	dominant	0.132648	0.147944	1.23403	0.880798	protective	NA
KEGG_SNARE_INTERACTIONS_IN_VESICULAR_TRANSPORT	REACTOME_L1CAM_INTERACTIONS	rs11583530	1	171708037	VAMP4	rs1531545	5	52897456	ITGA1	dominant	0.370612	0.392678	1.23339	0.910716	protective	NA
KEGG_SNARE_INTERACTIONS_IN_VESICULAR_TRANSPORT	REACTOME_L1CAM_INTERACTIONS	rs17564	12	130821769	STX2	rs7694725	4	113079800	ANK2	dominant	0.190321	0.21013	1.23228	0.883569	protective	NA
KEGG_SNARE_INTERACTIONS_IN_VESICULAR_TRANSPORT	REACTOME_L1CAM_INTERACTIONS	rs25680	12	6445462	VAMP1	rs7694725	4	113079800	ANK2	dominant	0.125125	0.14318	1.23174	0.855871	protective	NA
KEGG_SNARE_INTERACTIONS_IN_VESICULAR_TRANSPORT	REACTOME_L1CAM_INTERACTIONS	rs891203	19	17227073	USE1	rs3808755	9	17616195	SH3GL2	dominant	0.123119	0.139669	1.23017	0.864871	protective	NA
KEGG_SNARE_INTERACTIONS_IN_VESICULAR_TRANSPORT	REACTOME_L1CAM_INTERACTIONS	rs2236359	1	227747743	SNAP47	rs10893053	11	123610273	SCN3B	dominant	0.334754	0.355567	1.22805	0.912013	protective	NA
KEGG_SNARE_INTERACTIONS_IN_VESICULAR_TRANSPORT	REACTOME_L1CAM_INTERACTIONS	rs10902112	11	244106	BET1L	rs286592	5	154996537	KIF4B	dominant	0.255517	0.273821	1.2251	0.910206	protective	NA
KEGG_SNARE_INTERACTIONS_IN_VESICULAR_TRANSPORT	REACTOME_L1CAM_INTERACTIONS	rs1078004	2	85542588	VAMP5/VAMP8	rs29302	4	113303436	ANK2	dominant	0.468405	0.49323	1.22445	0.905322	protective	NA
KEGG_SNARE_INTERACTIONS_IN_VESICULAR_TRANSPORT	REACTOME_L1CAM_INTERACTIONS	rs718097	17	9212088	STX8	rs10956647	8	132190597	KCNQ3	dominant	0.364594	0.384654	1.22405	0.917925	protective	NA
KEGG_SNARE_INTERACTIONS_IN_VESICULAR_TRANSPORT	REACTOME_L1CAM_INTERACTIONS	rs2236359	1	227747743	SNAP47	rs2721876	8	132515828	KCNQ3	dominant	0.338014	0.358826	1.22364	0.912383	protective	NA
KEGG_SNARE_INTERACTIONS_IN_VESICULAR_TRANSPORT	REACTOME_L1CAM_INTERACTIONS	rs11246020	11	233067	BET1L	rs34789048	9	36169726	CLTA	dominant	0.0601805	0.0724674	1.22362	0.819593	protective	NA
KEGG_SNARE_INTERACTIONS_IN_VESICULAR_TRANSPORT	REACTOME_L1CAM_INTERACTIONS	rs28494095	7	73683390	STX1A	rs28568406	1	158717373	SPTA1	dominant	0.0855065	0.102056	1.22345	0.822675	protective	NA
KEGG_SNARE_INTERACTIONS_IN_VESICULAR_TRANSPORT	REACTOME_L1CAM_INTERACTIONS	rs4908482	1	7817428	VAMP3	rs11604757	11	1029320	AP2A2	dominant	0.127131	0.14318	1.22337	0.871591	protective	NA
KEGG_SNARE_INTERACTIONS_IN_VESICULAR_TRANSPORT	REACTOME_L1CAM_INTERACTIONS	rs2236359	1	227747743	SNAP47	rs11129795	3	38547672	SCN5A	dominant	0.26329	0.283099	1.22315	0.905019	protective	NA
KEGG_SNARE_INTERACTIONS_IN_VESICULAR_TRANSPORT	REACTOME_L1CAM_INTERACTIONS	rs2551799	17	9297594	STX8	rs267561	3	37533460	ITGA9	dominant	0.416249	0.437563	1.22285	0.916556	protective	NA
KEGG_SNARE_INTERACTIONS_IN_VESICULAR_TRANSPORT	REACTOME_L1CAM_INTERACTIONS	rs10902112	11	244106	BET1L	rs11599164	10	60072226	ANK3	dominant	0.0875125	0.0995486	1.22247	0.867498	protective	NA
KEGG_SNARE_INTERACTIONS_IN_VESICULAR_TRANSPORT	REACTOME_L1CAM_INTERACTIONS	rs1128349	7	73683324	STX1A	rs2303361	7	6409865	RAC1	dominant	0.245988	0.265547	1.22019	0.902317	protective	NA
KEGG_SNARE_INTERACTIONS_IN_VESICULAR_TRANSPORT	REACTOME_L1CAM_INTERACTIONS	rs10521157	17	9433053	STX8	rs10510181	3	149364	CHL1	dominant	0.224925	0.244985	1.21944	0.894354	protective	NA
KEGG_SNARE_INTERACTIONS_IN_VESICULAR_TRANSPORT	REACTOME_L1CAM_INTERACTIONS	rs2286845	7	93994146	BET1	rs3739609	9	36169601	CLTA	dominant	0.388415	0.410983	1.21821	0.910214	protective	NA
KEGG_SNARE_INTERACTIONS_IN_VESICULAR_TRANSPORT	REACTOME_L1CAM_INTERACTIONS	rs4908482	1	7817428	VAMP3	rs1380453	10	60274597	ANK3	dominant	0.426279	0.447342	1.21497	0.91793	protective	NA
KEGG_SNARE_INTERACTIONS_IN_VESICULAR_TRANSPORT	REACTOME_L1CAM_INTERACTIONS	rs2286845	7	93994146	BET1	rs17519184	18	6986715	LAMA1	dominant	0.341274	0.36334	1.21283	0.907805	protective	NA
KEGG_SNARE_INTERACTIONS_IN_VESICULAR_TRANSPORT	REACTOME_L1CAM_INTERACTIONS	rs4908482	1	7817428	VAMP3	rs11888208	2	166456941	SCN7A	dominant	0.157974	0.175025	1.21216	0.884301	protective	NA
KEGG_SNARE_INTERACTIONS_IN_VESICULAR_TRANSPORT	REACTOME_L1CAM_INTERACTIONS	rs6026468	20	58715291	STX16	rs805262	6	31660956	CSNK2B	dominant	0.466148	0.485206	1.2121	0.926428	protective	NA
KEGG_SNARE_INTERACTIONS_IN_VESICULAR_TRANSPORT	REACTOME_L1CAM_INTERACTIONS	rs3795504	1	180936312	STX6	rs7694725	4	113079800	ANK2	dominant	0.231444	0.252257	1.21064	0.892649	protective	NA
KEGG_SNARE_INTERACTIONS_IN_VESICULAR_TRANSPORT	REACTOME_L1CAM_INTERACTIONS	rs10521157	17	9433053	STX8	rs62107586	19	6468320	TUBB4A	dominant	0.267302	0.286359	1.21004	0.909171	protective	NA
KEGG_SNARE_INTERACTIONS_IN_VESICULAR_TRANSPORT	REACTOME_L1CAM_INTERACTIONS	rs10902112	11	244106	BET1L	rs2300014	7	108297798	NRCAM	dominant	0.309428	0.328736	1.20818	0.914949	protective	NA
KEGG_SNARE_INTERACTIONS_IN_VESICULAR_TRANSPORT	REACTOME_L1CAM_INTERACTIONS	rs28494095	7	73683390	STX1A	rs11888208	2	166456941	SCN7A	dominant	0.0361083	0.0458877	1.20794	0.778902	protective	NA
KEGG_SNARE_INTERACTIONS_IN_VESICULAR_TRANSPORT	REACTOME_L1CAM_INTERACTIONS	rs1195569	12	130740926	STX2	rs11604757	11	1029320	AP2A2	dominant	0.159478	0.176279	1.20783	0.886611	protective	NA
KEGG_SNARE_INTERACTIONS_IN_VESICULAR_TRANSPORT	REACTOME_L1CAM_INTERACTIONS	rs28494095	7	73683390	STX1A	rs3768781	2	186617108	ITGAV	dominant	0.0646941	0.0762287	1.20728	0.838218	protective	NA
KEGG_SNARE_INTERACTIONS_IN_VESICULAR_TRANSPORT	REACTOME_L1CAM_INTERACTIONS	rs11583530	1	171708037	VAMP4	rs11009235	10	33132620	NRP1	dominant	0.255266	0.275577	1.20436	0.901034	protective	NA
KEGG_SNARE_INTERACTIONS_IN_VESICULAR_TRANSPORT	REACTOME_L1CAM_INTERACTIONS	rs2551799	17	9297594	STX8	rs2261033	6	31635814	CSNK2B	dominant	0.457372	0.480943	1.20375	0.909681	protective	NA
KEGG_SNARE_INTERACTIONS_IN_VESICULAR_TRANSPORT	REACTOME_L1CAM_INTERACTIONS	rs2551799	17	9297594	STX8	rs12019224	3	37473850	ITGA9	dominant	0.364845	0.385657	1.20032	0.915035	protective	NA
KEGG_SNARE_INTERACTIONS_IN_VESICULAR_TRANSPORT	REACTOME_L1CAM_INTERACTIONS	rs2551799	17	9297594	STX8	rs2058194	17	63942988	SCN4A	dominant	0.424524	0.445838	1.19949	0.916927	protective	NA
KEGG_SNARE_INTERACTIONS_IN_VESICULAR_TRANSPORT	REACTOME_L1CAM_INTERACTIONS	rs6026468	20	58715291	STX16	rs11009235	10	33132620	NRP1	dominant	0.322718	0.341023	1.19842	0.920747	protective	NA
KEGG_SNARE_INTERACTIONS_IN_VESICULAR_TRANSPORT	REACTOME_L1CAM_INTERACTIONS	rs11583530	1	171708037	VAMP4	rs2303361	7	6409865	RAC1	dominant	0.180542	0.199097	1.19646	0.886268	protective	NA
KEGG_SNARE_INTERACTIONS_IN_VESICULAR_TRANSPORT	REACTOME_L1CAM_INTERACTIONS	rs2279008	19	17172493	USE1	rs1978973	3	105622370	ALCAM	dominant	0.0616851	0.0744734	1.19599	0.816994	protective	NA
KEGG_SNARE_INTERACTIONS_IN_VESICULAR_TRANSPORT	REACTOME_L1CAM_INTERACTIONS	rs2551799	17	9297594	STX8	rs1011731	1	172377408	DNM3	dominant	0.408475	0.429539	1.19539	0.917101	protective	NA
KEGG_SNARE_INTERACTIONS_IN_VESICULAR_TRANSPORT	REACTOME_L1CAM_INTERACTIONS	rs2551799	17	9297594	STX8	rs2776937	10	33317261	NRP1	dominant	0.264544	0.284102	1.19428	0.906393	protective	NA
KEGG_SNARE_INTERACTIONS_IN_VESICULAR_TRANSPORT	REACTOME_L1CAM_INTERACTIONS	rs3795504	1	180936312	STX6	rs11888208	2	166456941	SCN7A	dominant	0.190572	0.207121	1.19349	0.901284	protective	NA
KEGG_SNARE_INTERACTIONS_IN_VESICULAR_TRANSPORT	REACTOME_L1CAM_INTERACTIONS	rs2551799	17	9297594	STX8	rs7616103	3	105586965	ALCAM	dominant	0.412989	0.434052	1.19245	0.917332	protective	NA
KEGG_SNARE_INTERACTIONS_IN_VESICULAR_TRANSPORT	REACTOME_L1CAM_INTERACTIONS	rs10849451	12	6415513	VAMP1	rs62244081	3	38771518	SCN10A	dominant	0.318455	0.337763	1.19033	0.916126	protective	NA
KEGG_SNARE_INTERACTIONS_IN_VESICULAR_TRANSPORT	REACTOME_L1CAM_INTERACTIONS	rs891203	19	17227073	USE1	rs9347144	6	166665623	RPS6KA2	dominant	0.130391	0.146189	1.18897	0.875735	protective	NA
KEGG_SNARE_INTERACTIONS_IN_VESICULAR_TRANSPORT	REACTOME_L1CAM_INTERACTIONS	rs3027232	17	8118747	VAMP2	rs7006290	8	41757620	ANK1	dominant	0.204865	0.220662	1.18894	0.909964	protective	NA
KEGG_SNARE_INTERACTIONS_IN_VESICULAR_TRANSPORT	REACTOME_L1CAM_INTERACTIONS	rs25680	12	6445462	VAMP1	rs20556	7	107953544	LAMB1	dominant	0.23345	0.254764	1.18695	0.89086	protective	NA
KEGG_SNARE_INTERACTIONS_IN_VESICULAR_TRANSPORT	REACTOME_L1CAM_INTERACTIONS	rs2551799	17	9297594	STX8	rs71377306	17	47347921	ITGB3	dominant	0.0599298	0.0729689	1.18624	0.809914	protective	NA
KEGG_SNARE_INTERACTIONS_IN_VESICULAR_TRANSPORT	REACTOME_L1CAM_INTERACTIONS	rs4908482	1	7817428	VAMP3	rs7694725	4	113079800	ANK2	dominant	0.19007	0.209629	1.18558	0.884803	protective	NA
KEGG_SNARE_INTERACTIONS_IN_VESICULAR_TRANSPORT	REACTOME_L1CAM_INTERACTIONS	rs7216991	17	46974887	GOSR2	rs71377306	17	47347921	ITGB3	dominant	0.0667001	0.0802407	1.18232	0.81919	protective	NA
KEGG_SNARE_INTERACTIONS_IN_VESICULAR_TRANSPORT	REACTOME_L1CAM_INTERACTIONS	rs10521157	17	9433053	STX8	rs805262	6	31660956	CSNK2B	dominant	0.304915	0.322718	1.18059	0.920633	protective	NA
KEGG_SNARE_INTERACTIONS_IN_VESICULAR_TRANSPORT	REACTOME_L1CAM_INTERACTIONS	rs10849451	12	6415513	VAMP1	rs34789048	9	36169726	CLTA	dominant	0.112588	0.127382	1.1796	0.869123	protective	NA
KEGG_SNARE_INTERACTIONS_IN_VESICULAR_TRANSPORT	REACTOME_L1CAM_INTERACTIONS	rs72878024	11	199492	BET1L	rs12205572	6	166365976	RPS6KA2	dominant	0.0132899	0.0190572	1.17901	0.693292	protective	NA
KEGG_SNARE_INTERACTIONS_IN_VESICULAR_TRANSPORT	REACTOME_L1CAM_INTERACTIONS	rs6026468	20	58715291	STX16	rs6952125	7	6330563	RAC1	dominant	0.458124	0.479188	1.17715	0.918882	protective	NA
KEGG_SNARE_INTERACTIONS_IN_VESICULAR_TRANSPORT	REACTOME_L1CAM_INTERACTIONS	rs28494095	7	73683390	STX1A	rs2300014	7	108297798	NRCAM	dominant	0.0977934	0.110582	1.17513	0.871818	protective	NA
KEGG_SNARE_INTERACTIONS_IN_VESICULAR_TRANSPORT	REACTOME_L1CAM_INTERACTIONS	rs25680	12	6445462	VAMP1	rs723077	11	113323446	NCAM1	dominant	0.291123	0.313691	1.17393	0.898512	protective	NA
KEGG_SNARE_INTERACTIONS_IN_VESICULAR_TRANSPORT	REACTOME_L1CAM_INTERACTIONS	rs41278952	1	7737443	VAMP3	rs723077	11	113323446	NCAM1	dominant	0.171765	0.18681	1.17295	0.902761	protective	NA
KEGG_SNARE_INTERACTIONS_IN_VESICULAR_TRANSPORT	REACTOME_L1CAM_INTERACTIONS	rs4908482	1	7817428	VAMP3	rs2261033	6	31635814	CSNK2B	dominant	0.425025	0.448596	1.1704	0.908616	protective	NA
KEGG_SNARE_INTERACTIONS_IN_VESICULAR_TRANSPORT	REACTOME_L1CAM_INTERACTIONS	rs25680	12	6445462	VAMP1	rs11599164	10	60072226	ANK3	dominant	0.0737212	0.0887663	1.16835	0.817019	protective	NA
KEGG_SNARE_INTERACTIONS_IN_VESICULAR_TRANSPORT	REACTOME_L1CAM_INTERACTIONS	rs4908482	1	7817428	VAMP3	rs10893053	11	123610273	SCN3B	dominant	0.30993	0.329739	1.16804	0.912942	protective	NA
KEGG_SNARE_INTERACTIONS_IN_VESICULAR_TRANSPORT	REACTOME_L1CAM_INTERACTIONS	rs2286845	7	93994146	BET1	rs8106478	19	46873129	AP2S1	dominant	0.371615	0.393681	1.16689	0.910802	protective	NA
KEGG_SNARE_INTERACTIONS_IN_VESICULAR_TRANSPORT	REACTOME_L1CAM_INTERACTIONS	rs10521157	17	9433053	STX8	rs2303361	7	6409865	RAC1	dominant	0.156219	0.171264	1.16611	0.895888	protective	NA
KEGG_SNARE_INTERACTIONS_IN_VESICULAR_TRANSPORT	REACTOME_L1CAM_INTERACTIONS	rs25680	12	6445462	VAMP1	rs6598858	1	26583274	RPS6KA1	dominant	0.270812	0.292879	1.16458	0.896676	protective	NA
KEGG_SNARE_INTERACTIONS_IN_VESICULAR_TRANSPORT	REACTOME_L1CAM_INTERACTIONS	rs11583530	1	171708037	VAMP4	rs607230	18	6980524	LAMA1	dominant	0.242728	0.262538	1.16399	0.900361	protective	NA
KEGG_SNARE_INTERACTIONS_IN_VESICULAR_TRANSPORT	REACTOME_L1CAM_INTERACTIONS	rs3757840	7	44191617	YKT6	rs11599164	10	60072226	ANK3	dominant	0.13992	0.155717	1.16259	0.882047	protective	NA
KEGG_SNARE_INTERACTIONS_IN_VESICULAR_TRANSPORT	REACTOME_L1CAM_INTERACTIONS	rs891203	19	17227073	USE1	rs566655	18	7034509	LAMA1	dominant	0.0915246	0.105567	1.16095	0.853583	protective	NA
KEGG_SNARE_INTERACTIONS_IN_VESICULAR_TRANSPORT	REACTOME_L1CAM_INTERACTIONS	rs3757840	7	44191617	YKT6	rs2776937	10	33317261	NRP1	dominant	0.309178	0.328485	1.16061	0.914915	protective	NA
KEGG_SNARE_INTERACTIONS_IN_VESICULAR_TRANSPORT	REACTOME_L1CAM_INTERACTIONS	rs2551799	17	9297594	STX8	rs746463	11	110125219	RDX	dominant	0.321464	0.341525	1.15698	0.913435	protective	NA
KEGG_SNARE_INTERACTIONS_IN_VESICULAR_TRANSPORT	REACTOME_L1CAM_INTERACTIONS	rs1128349	7	73683324	STX1A	rs10810812	9	17586103	SH3GL2	dominant	0.42678	0.451103	1.15454	0.905937	protective	NA
KEGG_SNARE_INTERACTIONS_IN_VESICULAR_TRANSPORT	REACTOME_L1CAM_INTERACTIONS	rs1078004	2	85542588	VAMP5/VAMP8	rs28407527	9	137233633	TUBB4B	dominant	0.457623	0.481946	1.15439	0.90695	protective	NA
KEGG_SNARE_INTERACTIONS_IN_VESICULAR_TRANSPORT	REACTOME_L1CAM_INTERACTIONS	rs10849451	12	6415513	VAMP1	rs41273499	1	158562824	SPTA1	dominant	0.104313	0.118355	1.15345	0.867538	protective	NA
KEGG_SNARE_INTERACTIONS_IN_VESICULAR_TRANSPORT	REACTOME_L1CAM_INTERACTIONS	rs10902112	11	244106	BET1L	rs20559	1	183130425	LAMC1	dominant	0.0446339	0.0551655	1.15258	0.800172	protective	NA
KEGG_SNARE_INTERACTIONS_IN_VESICULAR_TRANSPORT	REACTOME_L1CAM_INTERACTIONS	rs718097	17	9212088	STX8	rs286592	5	154996537	KIF4B	dominant	0.410231	0.431043	1.1492	0.918131	protective	NA
KEGG_SNARE_INTERACTIONS_IN_VESICULAR_TRANSPORT	REACTOME_L1CAM_INTERACTIONS	rs1042164	19	13153584	STX10	rs1801475	20	63406924	KCNQ2	dominant	0.152708	0.168255	1.14815	0.890947	protective	NA
KEGG_SNARE_INTERACTIONS_IN_VESICULAR_TRANSPORT	REACTOME_L1CAM_INTERACTIONS	rs11583530	1	171708037	VAMP4	rs9841329	3	38646312	SCN5A	dominant	0.353561	0.374875	1.14654	0.912047	protective	NA
KEGG_SNARE_INTERACTIONS_IN_VESICULAR_TRANSPORT	REACTOME_L1CAM_INTERACTIONS	rs3795504	1	180936312	STX6	rs1531545	5	52897456	ITGA1	dominant	0.508024	0.529338	1.14463	0.918156	protective	NA
KEGG_SNARE_INTERACTIONS_IN_VESICULAR_TRANSPORT	REACTOME_L1CAM_INTERACTIONS	rs1128349	7	73683324	STX1A	rs280371	12	41114842	CNTN1	dominant	0.117101	0.13014	1.14032	0.886518	protective	NA
KEGG_SNARE_INTERACTIONS_IN_VESICULAR_TRANSPORT	REACTOME_L1CAM_INTERACTIONS	rs718097	17	9212088	STX8	rs280371	12	41114842	CNTN1	dominant	0.126128	0.139669	1.13978	0.889059	protective	NA
KEGG_SNARE_INTERACTIONS_IN_VESICULAR_TRANSPORT	REACTOME_L1CAM_INTERACTIONS	rs1545620	19	17192965	USE1	rs20559	1	183130425	LAMC1	dominant	0.0636911	0.0754764	1.13912	0.833232	protective	NA
KEGG_SNARE_INTERACTIONS_IN_VESICULAR_TRANSPORT	REACTOME_L1CAM_INTERACTIONS	rs3795504	1	180936312	STX6	rs2403730	8	132079891	KCNQ3	dominant	0.374624	0.396189	1.13828	0.912964	protective	NA
KEGG_SNARE_INTERACTIONS_IN_VESICULAR_TRANSPORT	REACTOME_L1CAM_INTERACTIONS	rs2236359	1	227747743	SNAP47	rs11888208	2	166456941	SCN7A	dominant	0.174273	0.191575	1.13695	0.890625	protective	NA
KEGG_SNARE_INTERACTIONS_IN_VESICULAR_TRANSPORT	REACTOME_L1CAM_INTERACTIONS	rs4908482	1	7817428	VAMP3	rs41315701	1	145872994	ITGA10	dominant	0.204614	0.222417	1.13681	0.899363	protective	NA
KEGG_SNARE_INTERACTIONS_IN_VESICULAR_TRANSPORT	REACTOME_L1CAM_INTERACTIONS	rs6026468	20	58715291	STX16	rs2227983	7	55161562	EGFR	dominant	0.279338	0.296891	1.13537	0.917962	protective	NA
KEGG_SNARE_INTERACTIONS_IN_VESICULAR_TRANSPORT	REACTOME_L1CAM_INTERACTIONS	rs11583530	1	171708037	VAMP4	rs6952125	7	6330563	RAC1	dominant	0.362839	0.384152	1.13179	0.912922	protective	NA
KEGG_SNARE_INTERACTIONS_IN_VESICULAR_TRANSPORT	REACTOME_L1CAM_INTERACTIONS	rs891203	19	17227073	USE1	rs12357206	10	60030625	ANK3	dominant	0.154213	0.170512	1.13117	0.886983	protective	NA
KEGG_SNARE_INTERACTIONS_IN_VESICULAR_TRANSPORT	REACTOME_L1CAM_INTERACTIONS	rs10462024	17	8148321	VAMP2	rs694739	11	64329761	RPS6KA4	dominant	0.374875	0.401204	1.13089	0.895021	protective	NA
KEGG_SNARE_INTERACTIONS_IN_VESICULAR_TRANSPORT	REACTOME_L1CAM_INTERACTIONS	rs2236359	1	227747743	SNAP47	rs6699312	1	171836182	DNM3	dominant	0.46339	0.484203	1.12736	0.919899	protective	NA
KEGG_SNARE_INTERACTIONS_IN_VESICULAR_TRANSPORT	REACTOME_L1CAM_INTERACTIONS	rs4908482	1	7817428	VAMP3	rs16915157	10	60586880	ANK3	dominant	0.197091	0.214644	1.12538	0.898151	protective	NA
KEGG_SNARE_INTERACTIONS_IN_VESICULAR_TRANSPORT	REACTOME_L1CAM_INTERACTIONS	rs2236359	1	227747743	SNAP47	rs3760238	17	63973168	SCN4A	dominant	0.475176	0.495988	1.12411	0.920046	protective	NA
KEGG_SNARE_INTERACTIONS_IN_VESICULAR_TRANSPORT	REACTOME_L1CAM_INTERACTIONS	rs11167136	8	142229454	TSNARE1	rs7694725	4	113079800	ANK2	dominant	0.21991	0.23997	1.12332	0.89284	protective	NA
KEGG_SNARE_INTERACTIONS_IN_VESICULAR_TRANSPORT	REACTOME_L1CAM_INTERACTIONS	rs1078004	2	85542588	VAMP5/VAMP8	rs751024	1	22817501	EPHB2	dominant	0.238465	0.26003	1.12302	0.891099	protective	NA
KEGG_SNARE_INTERACTIONS_IN_VESICULAR_TRANSPORT	REACTOME_L1CAM_INTERACTIONS	rs11583530	1	171708037	VAMP4	rs2502731	9	128214278	DNM1	dominant	0.288616	0.308927	1.12092	0.907579	protective	NA
KEGG_SNARE_INTERACTIONS_IN_VESICULAR_TRANSPORT	REACTOME_L1CAM_INTERACTIONS	rs2532500	12	6453644	VAMP1	rs10810812	9	17586103	SH3GL2	dominant	0.331494	0.354564	1.11817	0.902673	protective	NA
KEGG_SNARE_INTERACTIONS_IN_VESICULAR_TRANSPORT	REACTOME_L1CAM_INTERACTIONS	rs25680	12	6445462	VAMP1	rs11009235	10	33132620	NRP1	dominant	0.19985	0.21991	1.11749	0.885996	protective	NA
KEGG_SNARE_INTERACTIONS_IN_VESICULAR_TRANSPORT	REACTOME_L1CAM_INTERACTIONS	rs4908482	1	7817428	VAMP3	rs6764363	3	270666	CHL1	dominant	0.347543	0.367352	1.11685	0.917351	protective	NA
KEGG_SNARE_INTERACTIONS_IN_VESICULAR_TRANSPORT	REACTOME_L1CAM_INTERACTIONS	rs6026468	20	58715291	STX16	rs10810812	9	17586103	SH3GL2	dominant	0.398195	0.422016	1.11681	0.906204	protective	NA
KEGG_SNARE_INTERACTIONS_IN_VESICULAR_TRANSPORT	REACTOME_L1CAM_INTERACTIONS	rs718097	17	9212088	STX8	rs3018474	11	77504355	PAK1	dominant	0.477182	0.497242	1.11483	0.922836	protective	NA
KEGG_SNARE_INTERACTIONS_IN_VESICULAR_TRANSPORT	REACTOME_L1CAM_INTERACTIONS	rs891203	19	17227073	USE1	rs3813563	14	73492108	NUMB	dominant	0.148947	0.164995	1.11305	0.885713	protective	NA
KEGG_SNARE_INTERACTIONS_IN_VESICULAR_TRANSPORT	REACTOME_L1CAM_INTERACTIONS	rs3795504	1	180936312	STX6	rs2303361	7	6409865	RAC1	dominant	0.25326	0.270812	1.11275	0.913203	protective	NA
KEGG_SNARE_INTERACTIONS_IN_VESICULAR_TRANSPORT	REACTOME_L1CAM_INTERACTIONS	rs2551799	17	9297594	STX8	rs4916245	1	172236886	DNM3	dominant	0.439819	0.460381	1.11259	0.920272	protective	NA
KEGG_SNARE_INTERACTIONS_IN_VESICULAR_TRANSPORT	REACTOME_L1CAM_INTERACTIONS	rs891203	19	17227073	USE1	rs34789048	9	36169726	CLTA	dominant	0.030341	0.0398696	1.11224	0.753528	protective	NA
KEGG_SNARE_INTERACTIONS_IN_VESICULAR_TRANSPORT	REACTOME_L1CAM_INTERACTIONS	rs6026468	20	58715291	STX16	rs1380453	10	60274597	ANK3	dominant	0.45662	0.475677	1.1073	0.92627	protective	NA
KEGG_SNARE_INTERACTIONS_IN_VESICULAR_TRANSPORT	REACTOME_L1CAM_INTERACTIONS	rs3757840	7	44191617	YKT6	rs1380453	10	60274597	ANK3	dominant	0.525827	0.545637	1.10712	0.923435	protective	NA
KEGG_SNARE_INTERACTIONS_IN_VESICULAR_TRANSPORT	REACTOME_L1CAM_INTERACTIONS	rs25680	12	6445462	VAMP1	rs3816533	15	41841899	SPTBN5	dominant	0.0997994	0.116098	1.1071	0.844047	protective	NA
KEGG_SNARE_INTERACTIONS_IN_VESICULAR_TRANSPORT	REACTOME_L1CAM_INTERACTIONS	rs3757840	7	44191617	YKT6	rs6018027	20	37362389	SRC	dominant	0.326981	0.346038	1.1058	0.918171	protective	NA
KEGG_SNARE_INTERACTIONS_IN_VESICULAR_TRANSPORT	REACTOME_L1CAM_INTERACTIONS	rs2286845	7	93994146	BET1	rs6952125	7	6330563	RAC1	dominant	0.421765	0.443831	1.10458	0.914018	protective	NA
KEGG_SNARE_INTERACTIONS_IN_VESICULAR_TRANSPORT	REACTOME_L1CAM_INTERACTIONS	rs3027232	17	8118747	VAMP2	rs7911953	10	60031281	ANK3	dominant	0.0569208	0.0669509	1.1025	0.841145	protective	NA
KEGG_SNARE_INTERACTIONS_IN_VESICULAR_TRANSPORT	REACTOME_L1CAM_INTERACTIONS	rs28494095	7	73683390	STX1A	rs685870	11	64344456	RPS6KA4	dominant	0.0742227	0.0847543	1.09945	0.865777	protective	NA
KEGG_SNARE_INTERACTIONS_IN_VESICULAR_TRANSPORT	REACTOME_L1CAM_INTERACTIONS	rs891203	19	17227073	USE1	rs10956647	8	132190597	KCNQ3	dominant	0.103059	0.117352	1.09929	0.864211	protective	NA
KEGG_SNARE_INTERACTIONS_IN_VESICULAR_TRANSPORT	REACTOME_L1CAM_INTERACTIONS	rs4908482	1	7817428	VAMP3	rs34789048	9	36169726	CLTA	dominant	0.0852558	0.0987964	1.09825	0.85017	protective	NA
KEGG_SNARE_INTERACTIONS_IN_VESICULAR_TRANSPORT	REACTOME_L1CAM_INTERACTIONS	rs10100935	8	142344359	TSNARE1	rs3018474	11	77504355	PAK1	dominant	0.362588	0.381143	1.0977	0.923622	protective	NA
KEGG_SNARE_INTERACTIONS_IN_VESICULAR_TRANSPORT	REACTOME_L1CAM_INTERACTIONS	rs28494095	7	73683390	STX1A	rs607230	18	6980524	LAMA1	dominant	0.0694584	0.0794885	1.0972	0.864398	protective	NA
KEGG_SNARE_INTERACTIONS_IN_VESICULAR_TRANSPORT	REACTOME_L1CAM_INTERACTIONS	rs1078004	2	85542588	VAMP5/VAMP8	rs1801475	20	63406924	KCNQ2	dominant	0.402708	0.426279	1.09673	0.907425	protective	NA
KEGG_SNARE_INTERACTIONS_IN_VESICULAR_TRANSPORT	REACTOME_L1CAM_INTERACTIONS	rs3027232	17	8118747	VAMP2	rs10761482	10	60325579	ANK3	dominant	0.14669	0.162989	1.09604	0.882809	protective	NA
KEGG_SNARE_INTERACTIONS_IN_VESICULAR_TRANSPORT	REACTOME_L1CAM_INTERACTIONS	rs2236359	1	227747743	SNAP47	rs177389	14	73260801	NUMB	dominant	0.460381	0.480943	1.09535	0.920772	protective	NA
KEGG_SNARE_INTERACTIONS_IN_VESICULAR_TRANSPORT	REACTOME_L1CAM_INTERACTIONS	rs11583530	1	171708037	VAMP4	rs1969253	3	184158724	AP2M1	dominant	0.361836	0.387914	1.09505	0.894656	protective	NA
KEGG_SNARE_INTERACTIONS_IN_VESICULAR_TRANSPORT	REACTOME_L1CAM_INTERACTIONS	rs718097	17	9212088	STX8	rs9853984	3	38608689	SCN5A	dominant	0.470913	0.490471	1.09371	0.92463	protective	NA
KEGG_SNARE_INTERACTIONS_IN_VESICULAR_TRANSPORT	REACTOME_L1CAM_INTERACTIONS	rs28494095	7	73683390	STX1A	rs584427	11	113233274	NCAM1	dominant	0.104814	0.117352	1.0928	0.880653	protective	NA
KEGG_SNARE_INTERACTIONS_IN_VESICULAR_TRANSPORT	REACTOME_L1CAM_INTERACTIONS	rs41278952	1	7737443	VAMP3	rs3018474	11	77504355	PAK1	dominant	0.151956	0.167001	1.09012	0.893767	protective	NA
KEGG_SNARE_INTERACTIONS_IN_VESICULAR_TRANSPORT	REACTOME_L1CAM_INTERACTIONS	rs1078004	2	85542588	VAMP5/VAMP8	rs41273499	1	158562824	SPTA1	dominant	0.0930291	0.109829	1.08996	0.831342	protective	NA
KEGG_SNARE_INTERACTIONS_IN_VESICULAR_TRANSPORT	REACTOME_L1CAM_INTERACTIONS	rs1078004	2	85542588	VAMP5/VAMP8	rs7006290	8	41757620	ANK1	dominant	0.38014	0.40346	1.08833	0.906753	protective	NA
KEGG_SNARE_INTERACTIONS_IN_VESICULAR_TRANSPORT	REACTOME_L1CAM_INTERACTIONS	rs2236359	1	227747743	SNAP47	rs303819	12	51821318	SCN8A	dominant	0.158977	0.175527	1.08524	0.887892	protective	NA
KEGG_SNARE_INTERACTIONS_IN_VESICULAR_TRANSPORT	REACTOME_L1CAM_INTERACTIONS	rs1545620	19	17192965	USE1	rs11071896	15	66528912	MAP2K1	dominant	0.291625	0.311685	1.084	0.909144	protective	NA
KEGG_SNARE_INTERACTIONS_IN_VESICULAR_TRANSPORT	REACTOME_L1CAM_INTERACTIONS	rs41278952	1	7737443	VAMP3	rs3922844	3	38582762	SCN5A	dominant	0.11986	0.132899	1.08282	0.888526	protective	NA
KEGG_SNARE_INTERACTIONS_IN_VESICULAR_TRANSPORT	REACTOME_L1CAM_INTERACTIONS	rs10462024	17	8148321	VAMP2	rs2303361	7	6409865	RAC1	dominant	0.234955	0.251003	1.0825	0.916428	protective	NA
KEGG_SNARE_INTERACTIONS_IN_VESICULAR_TRANSPORT	REACTOME_L1CAM_INTERACTIONS	rs41278952	1	7737443	VAMP3	rs2977852	8	41631133	ANK1	dominant	0.158475	0.175777	1.08166	0.883033	protective	NA
KEGG_SNARE_INTERACTIONS_IN_VESICULAR_TRANSPORT	REACTOME_L1CAM_INTERACTIONS	rs25680	12	6445462	VAMP1	rs29302	4	113303436	ANK2	dominant	0.257523	0.278837	1.0807	0.897049	protective	NA
KEGG_SNARE_INTERACTIONS_IN_VESICULAR_TRANSPORT	REACTOME_L1CAM_INTERACTIONS	rs3795504	1	180936312	STX6	rs1978973	3	105622370	ALCAM	dominant	0.105567	0.120361	1.07932	0.862576	protective	NA
KEGG_SNARE_INTERACTIONS_IN_VESICULAR_TRANSPORT	REACTOME_L1CAM_INTERACTIONS	rs718097	17	9212088	STX8	rs2228479	16	89919532	TUBB3	dominant	0.112086	0.124373	1.07869	0.888739	protective	NA
KEGG_SNARE_INTERACTIONS_IN_VESICULAR_TRANSPORT	REACTOME_L1CAM_INTERACTIONS	rs4908482	1	7817428	VAMP3	rs1011731	1	172377408	DNM3	dominant	0.386409	0.406219	1.0782	0.920525	protective	NA
KEGG_SNARE_INTERACTIONS_IN_VESICULAR_TRANSPORT	REACTOME_L1CAM_INTERACTIONS	rs4908482	1	7817428	VAMP3	rs3922844	3	38582762	SCN5A	dominant	0.304413	0.32347	1.07781	0.915302	protective	NA
KEGG_SNARE_INTERACTIONS_IN_VESICULAR_TRANSPORT	REACTOME_L1CAM_INTERACTIONS	rs2551799	17	9297594	STX8	rs229587	14	64796582	SPTB	dominant	0.358576	0.378385	1.07748	0.918381	protective	NA
KEGG_SNARE_INTERACTIONS_IN_VESICULAR_TRANSPORT	REACTOME_L1CAM_INTERACTIONS	rs4908482	1	7817428	VAMP3	rs353116	2	165277122	SCN2A	dominant	0.367101	0.391424	1.07419	0.901817	protective	NA
KEGG_SNARE_INTERACTIONS_IN_VESICULAR_TRANSPORT	REACTOME_L1CAM_INTERACTIONS	rs2286845	7	93994146	BET1	rs71377306	17	47347921	ITGB3	dominant	0.0551655	0.0679539	1.07381	0.80082	protective	NA
KEGG_SNARE_INTERACTIONS_IN_VESICULAR_TRANSPORT	REACTOME_L1CAM_INTERACTIONS	rs891203	19	17227073	USE1	rs9347162	6	166858228	RPS6KA2	dominant	0.0945336	0.108325	1.07326	0.859393	protective	NA
KEGG_SNARE_INTERACTIONS_IN_VESICULAR_TRANSPORT	REACTOME_L1CAM_INTERACTIONS	rs41278952	1	7737443	VAMP3	rs597503	18	6939948	LAMA1	dominant	0.0496489	0.0624373	1.0732	0.78448	protective	NA
KEGG_SNARE_INTERACTIONS_IN_VESICULAR_TRANSPORT	REACTOME_L1CAM_INTERACTIONS	rs28494095	7	73683390	STX1A	rs10875943	12	49282227	TUBA1C	dominant	0.0667001	0.0764794	1.07232	0.862993	protective	NA
KEGG_SNARE_INTERACTIONS_IN_VESICULAR_TRANSPORT	REACTOME_L1CAM_INTERACTIONS	rs2236359	1	227747743	SNAP47	rs4916245	1	172236886	DNM3	dominant	0.451354	0.471665	1.06595	0.921512	protective	NA
KEGG_SNARE_INTERACTIONS_IN_VESICULAR_TRANSPORT	REACTOME_L1CAM_INTERACTIONS	rs10521157	17	9433053	STX8	rs3759786	15	66337065	MAP2K1	dominant	0.112086	0.124624	1.06524	0.886697	protective	NA
KEGG_SNARE_INTERACTIONS_IN_VESICULAR_TRANSPORT	REACTOME_L1CAM_INTERACTIONS	rs2286845	7	93994146	BET1	rs13164431	5	52868086	ITGA1	dominant	0.394433	0.415998	1.0629	0.914397	protective	NA
KEGG_SNARE_INTERACTIONS_IN_VESICULAR_TRANSPORT	REACTOME_L1CAM_INTERACTIONS	rs2236359	1	227747743	SNAP47	rs9347144	6	166665623	RPS6KA2	dominant	0.401705	0.421765	1.06231	0.920503	protective	NA
KEGG_SNARE_INTERACTIONS_IN_VESICULAR_TRANSPORT	REACTOME_L1CAM_INTERACTIONS	rs3027232	17	8118747	VAMP2	rs62107586	19	6468320	TUBB4A	dominant	0.245236	0.262788	1.06071	0.911504	protective	NA
KEGG_SNARE_INTERACTIONS_IN_VESICULAR_TRANSPORT	REACTOME_L1CAM_INTERACTIONS	rs4908482	1	7817428	VAMP3	rs17519184	18	6986715	LAMA1	dominant	0.340271	0.359579	1.0605	0.918609	protective	NA
KEGG_SNARE_INTERACTIONS_IN_VESICULAR_TRANSPORT	REACTOME_L1CAM_INTERACTIONS	rs10902112	11	244106	BET1L	rs12357206	10	60030625	ANK3	dominant	0.335005	0.354564	1.05969	0.917048	protective	NA
KEGG_SNARE_INTERACTIONS_IN_VESICULAR_TRANSPORT	REACTOME_L1CAM_INTERACTIONS	rs2236359	1	227747743	SNAP47	rs8106478	19	46873129	AP2S1	dominant	0.405968	0.426028	1.0592	0.920734	protective	NA
KEGG_SNARE_INTERACTIONS_IN_VESICULAR_TRANSPORT	REACTOME_L1CAM_INTERACTIONS	rs718097	17	9212088	STX8	rs62587579	9	137216103	TUBB4B	dominant	0.0661986	0.0762287	1.05759	0.859093	protective	NA
KEGG_SNARE_INTERACTIONS_IN_VESICULAR_TRANSPORT	REACTOME_L1CAM_INTERACTIONS	rs10902112	11	244106	BET1L	rs10956647	8	132190597	KCNQ3	dominant	0.223922	0.240973	1.05544	0.908824	protective	NA
KEGG_SNARE_INTERACTIONS_IN_VESICULAR_TRANSPORT	REACTOME_L1CAM_INTERACTIONS	rs718097	17	9212088	STX8	rs62244081	3	38771518	SCN10A	dominant	0.318205	0.33651	1.05437	0.920216	protective	NA
KEGG_SNARE_INTERACTIONS_IN_VESICULAR_TRANSPORT	REACTOME_L1CAM_INTERACTIONS	rs1078004	2	85542588	VAMP5/VAMP8	rs723077	11	113323446	NCAM1	dominant	0.525326	0.549398	1.05344	0.907693	protective	NA
KEGG_SNARE_INTERACTIONS_IN_VESICULAR_TRANSPORT	REACTOME_L1CAM_INTERACTIONS	rs3757840	7	44191617	YKT6	rs2721876	8	132515828	KCNQ3	dominant	0.381394	0.400451	1.05268	0.92307	protective	NA
KEGG_SNARE_INTERACTIONS_IN_VESICULAR_TRANSPORT	REACTOME_L1CAM_INTERACTIONS	rs1411478	1	180993146	STX6	rs28568406	1	158717373	SPTA1	dominant	0.410231	0.433551	1.05261	0.908798	protective	NA
KEGG_SNARE_INTERACTIONS_IN_VESICULAR_TRANSPORT	REACTOME_L1CAM_INTERACTIONS	rs499033	11	59713478	STX3	rs1805007	16	89919709	TUBB3	dominant	0.0195587	0.0258275	1.05156	0.75244	protective	NA
KEGG_SNARE_INTERACTIONS_IN_VESICULAR_TRANSPORT	REACTOME_L1CAM_INTERACTIONS	rs1356732950	6	132538470	STX7	rs20559	1	183130425	LAMC1	dominant	0.0456369	0.0559178	1.04947	0.807352	protective	NA
KEGG_SNARE_INTERACTIONS_IN_VESICULAR_TRANSPORT	REACTOME_L1CAM_INTERACTIONS	rs17564	12	130821769	STX2	rs353116	2	165277122	SCN2A	dominant	0.359328	0.3834	1.04843	0.902	protective	NA
KEGG_SNARE_INTERACTIONS_IN_VESICULAR_TRANSPORT	REACTOME_L1CAM_INTERACTIONS	rs11583530	1	171708037	VAMP4	rs662471	18	7008592	LAMA1	dominant	0.242979	0.262036	1.04792	0.90393	protective	NA
KEGG_SNARE_INTERACTIONS_IN_VESICULAR_TRANSPORT	REACTOME_L1CAM_INTERACTIONS	rs11583530	1	171708037	VAMP4	rs584427	11	113233274	NCAM1	dominant	0.368606	0.389418	1.04663	0.915354	protective	NA
KEGG_SNARE_INTERACTIONS_IN_VESICULAR_TRANSPORT	REACTOME_L1CAM_INTERACTIONS	rs7024419	9	99862214	STX17	rs11071896	15	66528912	MAP2K1	dominant	0.291374	0.311184	1.04609	0.910167	protective	NA
KEGG_SNARE_INTERACTIONS_IN_VESICULAR_TRANSPORT	REACTOME_L1CAM_INTERACTIONS	rs10521157	17	9433053	STX8	rs10810812	9	17586103	SH3GL2	dominant	0.26329	0.284855	1.04473	0.89724	protective	NA
KEGG_SNARE_INTERACTIONS_IN_VESICULAR_TRANSPORT	REACTOME_L1CAM_INTERACTIONS	rs3757840	7	44191617	YKT6	rs3816533	15	41841899	SPTBN5	dominant	0.185306	0.201605	1.04389	0.900765	protective	NA
KEGG_SNARE_INTERACTIONS_IN_VESICULAR_TRANSPORT	REACTOME_L1CAM_INTERACTIONS	rs891203	19	17227073	USE1	rs17346452	1	172084147	DNM3	dominant	0.0977934	0.111585	1.04062	0.863008	protective	NA
KEGG_SNARE_INTERACTIONS_IN_VESICULAR_TRANSPORT	REACTOME_L1CAM_INTERACTIONS	rs28365927	11	236091	BET1L	rs41273499	1	158562824	SPTA1	dominant	0.0348546	0.0446339	1.03994	0.772986	protective	NA
KEGG_SNARE_INTERACTIONS_IN_VESICULAR_TRANSPORT	REACTOME_L1CAM_INTERACTIONS	rs1411478	1	180993146	STX6	rs11071896	15	66528912	MAP2K1	dominant	0.312187	0.332247	1.03805	0.912218	protective	NA
KEGG_SNARE_INTERACTIONS_IN_VESICULAR_TRANSPORT	REACTOME_L1CAM_INTERACTIONS	rs33944211	3	94049424	STX19	rs11671653	19	10727810	DNM2	dominant	0.0308425	0.0391174	1.03783	0.78173	protective	NA
KEGG_SNARE_INTERACTIONS_IN_VESICULAR_TRANSPORT	REACTOME_L1CAM_INTERACTIONS	rs4908482	1	7817428	VAMP3	rs2721876	8	132515828	KCNQ3	dominant	0.309679	0.328485	1.03674	0.917065	protective	NA
KEGG_SNARE_INTERACTIONS_IN_VESICULAR_TRANSPORT	REACTOME_L1CAM_INTERACTIONS	rs28494095	7	73683390	STX1A	rs3759786	15	66337065	MAP2K1	dominant	0.0356068	0.0436309	1.03309	0.809302	protective	NA
KEGG_SNARE_INTERACTIONS_IN_VESICULAR_TRANSPORT	REACTOME_L1CAM_INTERACTIONS	rs9676419	19	17256626	USE1	rs17519184	18	6986715	LAMA1	dominant	0.231444	0.250752	1.03225	0.899812	protective	NA
KEGG_SNARE_INTERACTIONS_IN_VESICULAR_TRANSPORT	REACTOME_L1CAM_INTERACTIONS	rs891203	19	17227073	USE1	rs6699312	1	171836182	DNM3	dominant	0.153711	0.169509	1.03031	0.889878	protective	NA
KEGG_SNARE_INTERACTIONS_IN_VESICULAR_TRANSPORT	REACTOME_L1CAM_INTERACTIONS	rs4908482	1	7817428	VAMP3	rs4916245	1	172236886	DNM3	dominant	0.407974	0.427533	1.02891	0.922727	protective	NA
KEGG_SNARE_INTERACTIONS_IN_VESICULAR_TRANSPORT	REACTOME_L1CAM_INTERACTIONS	rs25680	12	6445462	VAMP1	rs12357206	10	60030625	ANK3	dominant	0.280843	0.302407	1.02626	0.900842	protective	NA
KEGG_SNARE_INTERACTIONS_IN_VESICULAR_TRANSPORT	REACTOME_L1CAM_INTERACTIONS	rs17851681	1	227766976	SNAP47	rs3816533	15	41841899	SPTBN5	dominant	0.0491474	0.059679	1.02572	0.814408	protective	NA
KEGG_SNARE_INTERACTIONS_IN_VESICULAR_TRANSPORT	REACTOME_L1CAM_INTERACTIONS	rs2286845	7	93994146	BET1	rs805262	6	31660956	CSNK2B	dominant	0.425025	0.44659	1.02486	0.916018	protective	NA
KEGG_SNARE_INTERACTIONS_IN_VESICULAR_TRANSPORT	REACTOME_L1CAM_INTERACTIONS	rs2286845	7	93994146	BET1	rs2298771	2	166036278	SCN1A	dominant	0.32322	0.343781	1.02429	0.911625	protective	NA
KEGG_SNARE_INTERACTIONS_IN_VESICULAR_TRANSPORT	REACTOME_L1CAM_INTERACTIONS	rs3027232	17	8118747	VAMP2	rs10510181	3	149364	CHL1	dominant	0.201605	0.21991	1.02339	0.895743	protective	NA
KEGG_SNARE_INTERACTIONS_IN_VESICULAR_TRANSPORT	REACTOME_L1CAM_INTERACTIONS	rs2532500	12	6453644	VAMP1	rs314253	17	7188331	DLG4	dominant	0.287613	0.305165	1.0228	0.91926	protective	NA
KEGG_SNARE_INTERACTIONS_IN_VESICULAR_TRANSPORT	REACTOME_L1CAM_INTERACTIONS	rs3757840	7	44191617	YKT6	rs723077	11	113323446	NCAM1	dominant	0.542126	0.561184	1.01891	0.925833	protective	NA
KEGG_SNARE_INTERACTIONS_IN_VESICULAR_TRANSPORT	REACTOME_L1CAM_INTERACTIONS	rs2286845	7	93994146	BET1	rs2261033	6	31635814	CSNK2B	dominant	0.43004	0.451605	1.01874	0.91622	protective	NA
KEGG_SNARE_INTERACTIONS_IN_VESICULAR_TRANSPORT	REACTOME_L1CAM_INTERACTIONS	rs891203	19	17227073	USE1	rs1801475	20	63406924	KCNQ2	dominant	0.125376	0.140171	1.01862	0.879325	protective	NA
KEGG_SNARE_INTERACTIONS_IN_VESICULAR_TRANSPORT	REACTOME_L1CAM_INTERACTIONS	rs3027232	17	8118747	VAMP2	rs20559	1	183130425	LAMC1	dominant	0.0346038	0.0438816	1.01854	0.780993	protective	NA
KEGG_SNARE_INTERACTIONS_IN_VESICULAR_TRANSPORT	REACTOME_L1CAM_INTERACTIONS	rs25680	12	6445462	VAMP1	rs3826408	17	7197973	DLG4	dominant	0.282598	0.304162	1.01841	0.901173	protective	NA
KEGG_SNARE_INTERACTIONS_IN_VESICULAR_TRANSPORT	REACTOME_L1CAM_INTERACTIONS	rs3027232	17	8118747	VAMP2	rs3759786	15	66337065	MAP2K1	dominant	0.0962889	0.107823	1.01786	0.881625	protective	NA
KEGG_SNARE_INTERACTIONS_IN_VESICULAR_TRANSPORT	REACTOME_L1CAM_INTERACTIONS	rs72878024	11	199492	BET1L	rs6598858	1	26583274	RPS6KA1	dominant	0.0937813	0.105567	1.01783	0.876808	protective	NA
KEGG_SNARE_INTERACTIONS_IN_VESICULAR_TRANSPORT	REACTOME_L1CAM_INTERACTIONS	rs10521157	17	9433053	STX8	rs11599164	10	60072226	ANK3	dominant	0.0822467	0.0932798	1.01777	0.871121	protective	NA
KEGG_SNARE_INTERACTIONS_IN_VESICULAR_TRANSPORT	REACTOME_L1CAM_INTERACTIONS	rs41278952	1	7737443	VAMP3	rs17180350	14	64782348	SPTB	dominant	0.0330993	0.0408726	1.01746	0.803306	protective	NA
KEGG_SNARE_INTERACTIONS_IN_VESICULAR_TRANSPORT	REACTOME_L1CAM_INTERACTIONS	rs718097	17	9212088	STX8	rs11604757	11	1029320	AP2A2	dominant	0.157723	0.173521	1.01434	0.891911	protective	NA
KEGG_SNARE_INTERACTIONS_IN_VESICULAR_TRANSPORT	REACTOME_L1CAM_INTERACTIONS	rs10521157	17	9433053	STX8	rs1201689	15	41813720	SPTBN5	dominant	0.256018	0.275326	1.01392	0.90574	protective	NA
KEGG_SNARE_INTERACTIONS_IN_VESICULAR_TRANSPORT	REACTOME_L1CAM_INTERACTIONS	rs41278952	1	7737443	VAMP3	rs2276635	2	219222719	TUBA4A/TUBA4B	dominant	0.0383651	0.0463892	1.01167	0.820126	protective	NA
KEGG_SNARE_INTERACTIONS_IN_VESICULAR_TRANSPORT	REACTOME_L1CAM_INTERACTIONS	rs718097	17	9212088	STX8	rs694739	11	64329761	RPS6KA4	dominant	0.430792	0.457372	1.01089	0.897904	protective	NA
KEGG_SNARE_INTERACTIONS_IN_VESICULAR_TRANSPORT	REACTOME_L1CAM_INTERACTIONS	rs3757840	7	44191617	YKT6	rs2229866	1	205061988	CNTN2/NFASC	dominant	0.400702	0.419509	1.01032	0.925196	protective	NA
KEGG_SNARE_INTERACTIONS_IN_VESICULAR_TRANSPORT	REACTOME_L1CAM_INTERACTIONS	rs11583530	1	171708037	VAMP4	rs3826408	17	7197973	DLG4	dominant	0.368355	0.388917	1.00878	0.916299	protective	NA
KEGG_SNARE_INTERACTIONS_IN_VESICULAR_TRANSPORT	REACTOME_L1CAM_INTERACTIONS	rs17564	12	130821769	STX2	rs11979158	7	55091656	EGFR	dominant	0.149448	0.163992	1.00765	0.895732	protective	NA
KEGG_SNARE_INTERACTIONS_IN_VESICULAR_TRANSPORT	REACTOME_L1CAM_INTERACTIONS	rs718097	17	9212088	STX8	rs12344583	9	133858398	VAV2	dominant	0.253511	0.272317	1.00749	0.907486	protective	NA
KEGG_SNARE_INTERACTIONS_IN_VESICULAR_TRANSPORT	REACTOME_L1CAM_INTERACTIONS	rs2236359	1	227747743	SNAP47	rs9841329	3	38646312	SCN5A	dominant	0.445336	0.465145	1.00311	0.923219	protective	NA
KEGG_SNARE_INTERACTIONS_IN_VESICULAR_TRANSPORT	REACTOME_L1CAM_INTERACTIONS	rs10100935	8	142344359	TSNARE1	rs3922844	3	38582762	SCN5A	dominant	0.29664	0.314443	1.00109	0.919502	protective	NA
KEGG_SNARE_INTERACTIONS_IN_VESICULAR_TRANSPORT	REACTOME_L1CAM_INTERACTIONS	rs2551799	17	9297594	STX8	rs314253	17	7188331	DLG4	dominant	0.34328	0.362337	0.997633	0.919912	protective	NA
KEGG_SNARE_INTERACTIONS_IN_VESICULAR_TRANSPORT	REACTOME_L1CAM_INTERACTIONS	rs1545620	19	17192965	USE1	rs694739	11	64329761	RPS6KA4	dominant	0.37337	0.398947	0.994225	0.89769	protective	NA
KEGG_SNARE_INTERACTIONS_IN_VESICULAR_TRANSPORT	REACTOME_L1CAM_INTERACTIONS	rs2551799	17	9297594	STX8	rs857725	1	158638145	SPTA1	dominant	0.281595	0.2999	0.990108	0.915038	protective	NA
KEGG_SNARE_INTERACTIONS_IN_VESICULAR_TRANSPORT	REACTOME_L1CAM_INTERACTIONS	rs4908482	1	7817428	VAMP3	rs2227983	7	55161562	EGFR	dominant	0.260782	0.278586	0.989763	0.913549	protective	NA
KEGG_SNARE_INTERACTIONS_IN_VESICULAR_TRANSPORT	REACTOME_L1CAM_INTERACTIONS	rs2236359	1	227747743	SNAP47	rs71377306	17	47347921	ITGB3	dominant	0.0641926	0.0769809	0.982969	0.822481	protective	NA
KEGG_SNARE_INTERACTIONS_IN_VESICULAR_TRANSPORT	REACTOME_L1CAM_INTERACTIONS	rs3027232	17	8118747	VAMP2	rs62244081	3	38771518	SCN10A	dominant	0.158225	0.17327	0.982657	0.896848	protective	NA
KEGG_SNARE_INTERACTIONS_IN_VESICULAR_TRANSPORT	REACTOME_L1CAM_INTERACTIONS	rs2279008	19	17172493	USE1	rs2303361	7	6409865	RAC1	dominant	0.15672	0.173019	0.980959	0.88829	protective	NA
KEGG_SNARE_INTERACTIONS_IN_VESICULAR_TRANSPORT	REACTOME_L1CAM_INTERACTIONS	rs3757840	7	44191617	YKT6	rs11979158	7	55091656	EGFR	dominant	0.193831	0.20988	0.980441	0.905152	protective	NA
KEGG_SNARE_INTERACTIONS_IN_VESICULAR_TRANSPORT	REACTOME_L1CAM_INTERACTIONS	rs7024419	9	99862214	STX17	rs2228479	16	89919532	TUBB3	dominant	0.0952859	0.108074	0.978893	0.869208	protective	NA
KEGG_SNARE_INTERACTIONS_IN_VESICULAR_TRANSPORT	REACTOME_L1CAM_INTERACTIONS	rs2236359	1	227747743	SNAP47	rs16915157	10	60586880	ANK3	dominant	0.220662	0.237964	0.978324	0.906705	protective	NA
KEGG_SNARE_INTERACTIONS_IN_VESICULAR_TRANSPORT	REACTOME_L1CAM_INTERACTIONS	rs1195569	12	130740926	STX2	rs3018474	11	77504355	PAK1	dominant	0.4832	0.502508	0.978185	0.925652	protective	NA
KEGG_SNARE_INTERACTIONS_IN_VESICULAR_TRANSPORT	REACTOME_L1CAM_INTERACTIONS	rs11583530	1	171708037	VAMP4	rs805262	6	31660956	CSNK2B	dominant	0.363842	0.384152	0.978108	0.916889	protective	NA
KEGG_SNARE_INTERACTIONS_IN_VESICULAR_TRANSPORT	REACTOME_L1CAM_INTERACTIONS	rs10849451	12	6415513	VAMP1	rs2293079	2	219236065	TUBA4A/TUBA4B	dominant	0.17653	0.195838	0.977577	0.880273	protective	NA
KEGG_SNARE_INTERACTIONS_IN_VESICULAR_TRANSPORT	REACTOME_L1CAM_INTERACTIONS	rs362988	20	10300722	SNAP25	rs11888208	2	166456941	SCN7A	dominant	0.189569	0.210381	0.976706	0.877933	protective	NA
KEGG_SNARE_INTERACTIONS_IN_VESICULAR_TRANSPORT	REACTOME_L1CAM_INTERACTIONS	rs1411478	1	180993146	STX6	rs353116	2	165277122	SCN2A	dominant	0.415496	0.439819	0.975553	0.905386	protective	NA
KEGG_SNARE_INTERACTIONS_IN_VESICULAR_TRANSPORT	REACTOME_L1CAM_INTERACTIONS	rs4908482	1	7817428	VAMP3	rs29302	4	113303436	ANK2	dominant	0.393932	0.412989	0.97417	0.923863	protective	NA
KEGG_SNARE_INTERACTIONS_IN_VESICULAR_TRANSPORT	REACTOME_L1CAM_INTERACTIONS	rs2551799	17	9297594	STX8	rs584427	11	113233274	NCAM1	dominant	0.454865	0.474423	0.972986	0.924374	protective	NA
KEGG_SNARE_INTERACTIONS_IN_VESICULAR_TRANSPORT	REACTOME_L1CAM_INTERACTIONS	rs4908482	1	7817428	VAMP3	rs1978973	3	105622370	ALCAM	dominant	0.0887663	0.102307	0.968879	0.854754	protective	NA
KEGG_SNARE_INTERACTIONS_IN_VESICULAR_TRANSPORT	REACTOME_L1CAM_INTERACTIONS	rs10902112	11	244106	BET1L	rs3816533	15	41841899	SPTBN5	dominant	0.115848	0.129137	0.966599	0.883603	protective	NA
KEGG_SNARE_INTERACTIONS_IN_VESICULAR_TRANSPORT	REACTOME_L1CAM_INTERACTIONS	rs72878024	11	199492	BET1L	rs314253	17	7188331	DLG4	dominant	0.0767302	0.0877633	0.966154	0.863838	protective	NA
KEGG_SNARE_INTERACTIONS_IN_VESICULAR_TRANSPORT	REACTOME_L1CAM_INTERACTIONS	rs891203	19	17227073	USE1	rs10875943	12	49282227	TUBA1C	dominant	0.100301	0.113842	0.962005	0.867797	protective	NA
KEGG_SNARE_INTERACTIONS_IN_VESICULAR_TRANSPORT	REACTOME_L1CAM_INTERACTIONS	rs4908482	1	7817428	VAMP3	rs226441	17	35706053	AP2B1	dominant	0.412237	0.431294	0.959986	0.924823	protective	NA
KEGG_SNARE_INTERACTIONS_IN_VESICULAR_TRANSPORT	REACTOME_L1CAM_INTERACTIONS	rs10462024	17	8148321	VAMP2	rs28568406	1	158717373	SPTA1	dominant	0.394433	0.417001	0.957572	0.910631	protective	NA
KEGG_SNARE_INTERACTIONS_IN_VESICULAR_TRANSPORT	REACTOME_L1CAM_INTERACTIONS	rs2551799	17	9297594	STX8	rs12205572	6	166365976	RPS6KA2	dominant	0.0661986	0.0782347	0.955615	0.835247	protective	NA
KEGG_SNARE_INTERACTIONS_IN_VESICULAR_TRANSPORT	REACTOME_L1CAM_INTERACTIONS	rs891203	19	17227073	USE1	rs2721876	8	132515828	KCNQ3	dominant	0.11334	0.127382	0.955532	0.875672	protective	NA
KEGG_SNARE_INTERACTIONS_IN_VESICULAR_TRANSPORT	REACTOME_L1CAM_INTERACTIONS	rs2286845	7	93994146	BET1	rs29302	4	113303436	ANK2	dominant	0.39343	0.414243	0.95273	0.91717	protective	NA
KEGG_SNARE_INTERACTIONS_IN_VESICULAR_TRANSPORT	REACTOME_L1CAM_INTERACTIONS	rs4908482	1	7817428	VAMP3	rs11071896	15	66528912	MAP2K1	dominant	0.267803	0.28661	0.949609	0.910384	protective	NA
KEGG_SNARE_INTERACTIONS_IN_VESICULAR_TRANSPORT	REACTOME_L1CAM_INTERACTIONS	rs3757840	7	44191617	YKT6	rs2261033	6	31635814	CSNK2B	dominant	0.531344	0.55015	0.94953	0.927059	protective	NA
KEGG_SNARE_INTERACTIONS_IN_VESICULAR_TRANSPORT	REACTOME_L1CAM_INTERACTIONS	rs2279008	19	17172493	USE1	rs1805007	16	89919709	TUBB3	dominant	0.0483952	0.0579238	0.949181	0.827132	protective	NA
KEGG_SNARE_INTERACTIONS_IN_VESICULAR_TRANSPORT	REACTOME_L1CAM_INTERACTIONS	rs11583530	1	171708037	VAMP4	rs3816533	15	41841899	SPTBN5	dominant	0.129639	0.145186	0.948561	0.876969	protective	NA
KEGG_SNARE_INTERACTIONS_IN_VESICULAR_TRANSPORT	REACTOME_L1CAM_INTERACTIONS	rs2236359	1	227747743	SNAP47	rs3018474	11	77504355	PAK1	dominant	0.427282	0.44659	0.947943	0.924511	protective	NA
KEGG_SNARE_INTERACTIONS_IN_VESICULAR_TRANSPORT	REACTOME_L1CAM_INTERACTIONS	rs2236359	1	227747743	SNAP47	rs240049	22	21906236	MAPK1	dominant	0.472919	0.492477	0.946299	0.924651	protective	NA
KEGG_SNARE_INTERACTIONS_IN_VESICULAR_TRANSPORT	REACTOME_L1CAM_INTERACTIONS	rs2908290	7	44176538	YKT6	rs28568406	1	158717373	SPTA1	dominant	0.35657	0.378636	0.945668	0.909426	protective	NA
KEGG_SNARE_INTERACTIONS_IN_VESICULAR_TRANSPORT	REACTOME_L1CAM_INTERACTIONS	rs1078004	2	85542588	VAMP5/VAMP8	rs2209440	9	17736344	SH3GL2	dominant	0.50677	0.53009	0.945223	0.910807	protective	NA
KEGG_SNARE_INTERACTIONS_IN_VESICULAR_TRANSPORT	REACTOME_L1CAM_INTERACTIONS	rs1128349	7	73683324	STX1A	rs20559	1	183130425	LAMC1	dominant	0.0664493	0.0777332	0.941692	0.844506	protective	NA
KEGG_SNARE_INTERACTIONS_IN_VESICULAR_TRANSPORT	REACTOME_L1CAM_INTERACTIONS	rs2286845	7	93994146	BET1	rs20556	7	107953544	LAMB1	dominant	0.350552	0.370863	0.941683	0.915672	protective	NA
KEGG_SNARE_INTERACTIONS_IN_VESICULAR_TRANSPORT	REACTOME_L1CAM_INTERACTIONS	rs2551799	17	9297594	STX8	rs41273499	1	158562824	SPTA1	dominant	0.0867603	0.0997994	0.940359	0.856934	protective	NA
KEGG_SNARE_INTERACTIONS_IN_VESICULAR_TRANSPORT	REACTOME_L1CAM_INTERACTIONS	rs2551799	17	9297594	STX8	rs240049	22	21906236	MAPK1	dominant	0.46013	0.47994	0.938945	0.923547	protective	NA
KEGG_SNARE_INTERACTIONS_IN_VESICULAR_TRANSPORT	REACTOME_L1CAM_INTERACTIONS	rs3795504	1	180936312	STX6	rs28568406	1	158717373	SPTA1	dominant	0.429539	0.452357	0.938516	0.911574	protective	NA
KEGG_SNARE_INTERACTIONS_IN_VESICULAR_TRANSPORT	REACTOME_L1CAM_INTERACTIONS	rs25680	12	6445462	VAMP1	rs3739609	9	36169601	CLTA	dominant	0.258275	0.278837	0.936427	0.900582	protective	NA
KEGG_SNARE_INTERACTIONS_IN_VESICULAR_TRANSPORT	REACTOME_L1CAM_INTERACTIONS	rs7024419	9	99862214	STX17	rs3816533	15	41841899	SPTBN5	dominant	0.165246	0.179789	0.936237	0.903094	protective	NA
KEGG_SNARE_INTERACTIONS_IN_VESICULAR_TRANSPORT	REACTOME_L1CAM_INTERACTIONS	rs7024419	9	99862214	STX17	rs11979158	7	55091656	EGFR	dominant	0.165998	0.180542	0.936122	0.903411	protective	NA
KEGG_SNARE_INTERACTIONS_IN_VESICULAR_TRANSPORT	REACTOME_L1CAM_INTERACTIONS	rs2908290	7	44176538	YKT6	rs11888208	2	166456941	SCN7A	dominant	0.160983	0.175276	0.934354	0.902809	protective	NA
KEGG_SNARE_INTERACTIONS_IN_VESICULAR_TRANSPORT	REACTOME_L1CAM_INTERACTIONS	rs25680	12	6445462	VAMP1	rs229587	14	64796582	SPTB	dominant	0.228435	0.248245	0.930987	0.896576	protective	NA
KEGG_SNARE_INTERACTIONS_IN_VESICULAR_TRANSPORT	REACTOME_L1CAM_INTERACTIONS	rs891203	19	17227073	USE1	rs226441	17	35706053	AP2B1	dominant	0.152959	0.168255	0.93004	0.892675	protective	NA
KEGG_SNARE_INTERACTIONS_IN_VESICULAR_TRANSPORT	REACTOME_L1CAM_INTERACTIONS	rs2532500	12	6453644	VAMP1	rs28568406	1	158717373	SPTA1	dominant	0.325727	0.347292	0.927773	0.90791	protective	NA
KEGG_SNARE_INTERACTIONS_IN_VESICULAR_TRANSPORT	REACTOME_L1CAM_INTERACTIONS	rs2551799	17	9297594	STX8	rs2303361	7	6409865	RAC1	dominant	0.230441	0.247492	0.926728	0.910474	protective	NA
KEGG_SNARE_INTERACTIONS_IN_VESICULAR_TRANSPORT	REACTOME_L1CAM_INTERACTIONS	rs4908482	1	7817428	VAMP3	rs17346452	1	172084147	DNM3	dominant	0.278084	0.295637	0.923051	0.917757	protective	NA
KEGG_SNARE_INTERACTIONS_IN_VESICULAR_TRANSPORT	REACTOME_L1CAM_INTERACTIONS	rs2236359	1	227747743	SNAP47	rs17519184	18	6986715	LAMA1	dominant	0.377633	0.396439	0.921392	0.923778	protective	NA
KEGG_SNARE_INTERACTIONS_IN_VESICULAR_TRANSPORT	REACTOME_L1CAM_INTERACTIONS	rs10521157	17	9433053	STX8	rs11888208	2	166456941	SCN7A	dominant	0.112337	0.125125	0.919408	0.884861	protective	NA
KEGG_SNARE_INTERACTIONS_IN_VESICULAR_TRANSPORT	REACTOME_L1CAM_INTERACTIONS	rs28494095	7	73683390	STX1A	rs314253	17	7188331	DLG4	dominant	0.0772317	0.088014	0.914942	0.86724	protective	NA
KEGG_SNARE_INTERACTIONS_IN_VESICULAR_TRANSPORT	REACTOME_L1CAM_INTERACTIONS	rs891203	19	17227073	USE1	rs2293079	2	219236065	TUBA4A/TUBA4B	dominant	0.0509027	0.0634403	0.914647	0.791772	protective	NA
KEGG_SNARE_INTERACTIONS_IN_VESICULAR_TRANSPORT	REACTOME_L1CAM_INTERACTIONS	rs9676419	19	17256626	USE1	rs11979158	7	55091656	EGFR	dominant	0.103561	0.116098	0.912303	0.879533	protective	NA
KEGG_SNARE_INTERACTIONS_IN_VESICULAR_TRANSPORT	REACTOME_L1CAM_INTERACTIONS	rs2286845	7	93994146	BET1	rs34162626	6	13611846	RANBP9	dominant	0.0644433	0.0772317	0.907925	0.82301	protective	NA
KEGG_SNARE_INTERACTIONS_IN_VESICULAR_TRANSPORT	REACTOME_L1CAM_INTERACTIONS	rs9676419	19	17256626	USE1	rs11604757	11	1029320	AP2A2	dominant	0.0845035	0.0970411	0.905878	0.858876	protective	NA
KEGG_SNARE_INTERACTIONS_IN_VESICULAR_TRANSPORT	REACTOME_L1CAM_INTERACTIONS	rs891203	19	17227073	USE1	rs3018474	11	77504355	PAK1	dominant	0.141174	0.155968	0.905131	0.889552	protective	NA
KEGG_SNARE_INTERACTIONS_IN_VESICULAR_TRANSPORT	REACTOME_L1CAM_INTERACTIONS	rs2286845	7	93994146	BET1	rs61759822	9	137252821	TUBB4B	dominant	0.123872	0.139418	0.901841	0.872723	protective	NA
KEGG_SNARE_INTERACTIONS_IN_VESICULAR_TRANSPORT	REACTOME_L1CAM_INTERACTIONS	rs11583530	1	171708037	VAMP4	rs1201689	15	41813720	SPTBN5	dominant	0.31319	0.332497	0.894436	0.915451	protective	NA
KEGG_SNARE_INTERACTIONS_IN_VESICULAR_TRANSPORT	REACTOME_L1CAM_INTERACTIONS	rs891203	19	17227073	USE1	rs6950826	7	55155483	EGFR	dominant	0.150702	0.165747	0.892384	0.893122	protective	NA
KEGG_SNARE_INTERACTIONS_IN_VESICULAR_TRANSPORT	REACTOME_L1CAM_INTERACTIONS	rs4908482	1	7817428	VAMP3	rs177389	14	73260801	NUMB	dominant	0.415496	0.434052	0.891264	0.926861	protective	NA
KEGG_SNARE_INTERACTIONS_IN_VESICULAR_TRANSPORT	REACTOME_L1CAM_INTERACTIONS	rs6026468	20	58715291	STX16	rs11979158	7	55091656	EGFR	dominant	0.167001	0.181294	0.889646	0.905356	protective	NA
KEGG_SNARE_INTERACTIONS_IN_VESICULAR_TRANSPORT	REACTOME_L1CAM_INTERACTIONS	rs25680	12	6445462	VAMP1	rs3018474	11	77504355	PAK1	dominant	0.258526	0.278837	0.888048	0.901761	protective	NA
KEGG_SNARE_INTERACTIONS_IN_VESICULAR_TRANSPORT	REACTOME_L1CAM_INTERACTIONS	rs4908482	1	7817428	VAMP3	rs2303361	7	6409865	RAC1	dominant	0.215647	0.231946	0.88696	0.91041	protective	NA
KEGG_SNARE_INTERACTIONS_IN_VESICULAR_TRANSPORT	REACTOME_L1CAM_INTERACTIONS	rs17564	12	130821769	STX2	rs10510181	3	149364	CHL1	dominant	0.309428	0.328736	0.88603	0.914949	protective	NA
KEGG_SNARE_INTERACTIONS_IN_VESICULAR_TRANSPORT	REACTOME_L1CAM_INTERACTIONS	rs1195569	12	130740926	STX2	rs314253	17	7188331	DLG4	dominant	0.399448	0.418506	0.885486	0.924176	protective	NA
KEGG_SNARE_INTERACTIONS_IN_VESICULAR_TRANSPORT	REACTOME_L1CAM_INTERACTIONS	rs10100935	8	142344359	TSNARE1	rs10810812	9	17586103	SH3GL2	dominant	0.349047	0.370863	0.882969	0.909635	protective	NA
KEGG_SNARE_INTERACTIONS_IN_VESICULAR_TRANSPORT	REACTOME_L1CAM_INTERACTIONS	rs4908482	1	7817428	VAMP3	rs3739609	9	36169601	CLTA	dominant	0.386409	0.404714	0.882544	0.926288	protective	NA
KEGG_SNARE_INTERACTIONS_IN_VESICULAR_TRANSPORT	REACTOME_L1CAM_INTERACTIONS	rs3795504	1	180936312	STX6	rs34789048	9	36169726	CLTA	dominant	0.105567	0.118857	0.881951	0.874989	protective	NA
KEGG_SNARE_INTERACTIONS_IN_VESICULAR_TRANSPORT	REACTOME_L1CAM_INTERACTIONS	rs1078004	2	85542588	VAMP5/VAMP8	rs10893053	11	123610273	SCN3B	dominant	0.363842	0.385657	0.880385	0.91108	protective	NA
KEGG_SNARE_INTERACTIONS_IN_VESICULAR_TRANSPORT	REACTOME_L1CAM_INTERACTIONS	rs25680	12	6445462	VAMP1	rs16851669	2	166149820	SCN1A/SCN9A	dominant	0.229689	0.249248	0.878491	0.898131	protective	NA
KEGG_SNARE_INTERACTIONS_IN_VESICULAR_TRANSPORT	REACTOME_L1CAM_INTERACTIONS	rs4908482	1	7817428	VAMP3	rs2233701	8	26508200	DPYSL2	dominant	0.118857	0.132648	0.878305	0.882006	protective	NA
KEGG_SNARE_INTERACTIONS_IN_VESICULAR_TRANSPORT	REACTOME_L1CAM_INTERACTIONS	rs2279008	19	17172493	USE1	rs694739	11	64329761	RPS6KA4	dominant	0.253761	0.27658	0.876489	0.889443	protective	NA
KEGG_SNARE_INTERACTIONS_IN_VESICULAR_TRANSPORT	REACTOME_L1CAM_INTERACTIONS	rs25680	12	6445462	VAMP1	rs6952125	7	6330563	RAC1	dominant	0.281846	0.302658	0.876418	0.904247	protective	NA
KEGG_SNARE_INTERACTIONS_IN_VESICULAR_TRANSPORT	REACTOME_L1CAM_INTERACTIONS	rs2236359	1	227747743	SNAP47	rs751024	1	22817501	EPHB2	dominant	0.218907	0.235456	0.87546	0.910014	protective	NA
KEGG_SNARE_INTERACTIONS_IN_VESICULAR_TRANSPORT	REACTOME_L1CAM_INTERACTIONS	rs3027232	17	8118747	VAMP2	rs7664927	4	113137217	ANK2	dominant	0.0423771	0.0504012	0.874713	0.833751	protective	NA
KEGG_SNARE_INTERACTIONS_IN_VESICULAR_TRANSPORT	REACTOME_L1CAM_INTERACTIONS	rs72878024	11	199492	BET1L	rs2283125	9	133727220	VAV2	dominant	0.0672016	0.0777332	0.874592	0.854755	protective	NA
KEGG_SNARE_INTERACTIONS_IN_VESICULAR_TRANSPORT	REACTOME_L1CAM_INTERACTIONS	rs3027232	17	8118747	VAMP2	rs12205572	6	166365976	RPS6KA2	dominant	0.0388666	0.0466399	0.873724	0.826594	protective	NA
KEGG_SNARE_INTERACTIONS_IN_VESICULAR_TRANSPORT	REACTOME_L1CAM_INTERACTIONS	rs25680	12	6445462	VAMP1	rs17121881	11	118210630	SCN2B	dominant	0.261785	0.282096	0.873258	0.902467	protective	NA
KEGG_SNARE_INTERACTIONS_IN_VESICULAR_TRANSPORT	REACTOME_L1CAM_INTERACTIONS	rs33944211	3	94049424	STX19	rs11979158	7	55091656	EGFR	dominant	0.051655	0.0614343	0.864249	0.832146	protective	NA
KEGG_SNARE_INTERACTIONS_IN_VESICULAR_TRANSPORT	REACTOME_L1CAM_INTERACTIONS	rs891203	19	17227073	USE1	rs11888208	2	166456941	SCN7A	dominant	0.055667	0.0664493	0.861617	0.828171	protective	NA
KEGG_SNARE_INTERACTIONS_IN_VESICULAR_TRANSPORT	REACTOME_L1CAM_INTERACTIONS	rs3027232	17	8118747	VAMP2	rs3816533	15	41841899	SPTBN5	dominant	0.0970411	0.109077	0.860979	0.877796	protective	NA
KEGG_SNARE_INTERACTIONS_IN_VESICULAR_TRANSPORT	REACTOME_L1CAM_INTERACTIONS	rs25680	12	6445462	VAMP1	rs314253	17	7188331	DLG4	dominant	0.213641	0.232698	0.860836	0.895853	protective	NA
KEGG_SNARE_INTERACTIONS_IN_VESICULAR_TRANSPORT	REACTOME_L1CAM_INTERACTIONS	rs11583530	1	171708037	VAMP4	rs6764363	3	270666	CHL1	dominant	0.305667	0.324473	0.860478	0.916524	protective	NA
KEGG_SNARE_INTERACTIONS_IN_VESICULAR_TRANSPORT	REACTOME_L1CAM_INTERACTIONS	rs3027232	17	8118747	VAMP2	rs9347144	6	166665623	RPS6KA2	dominant	0.23671	0.254263	0.854806	0.909558	protective	NA
KEGG_SNARE_INTERACTIONS_IN_VESICULAR_TRANSPORT	REACTOME_L1CAM_INTERACTIONS	rs2551799	17	9297594	STX8	rs34789048	9	36169726	CLTA	dominant	0.0967904	0.109829	0.853529	0.868556	protective	NA
KEGG_SNARE_INTERACTIONS_IN_VESICULAR_TRANSPORT	REACTOME_L1CAM_INTERACTIONS	rs11167136	8	142229454	TSNARE1	rs353116	2	165277122	SCN2A	dominant	0.432297	0.456118	0.852148	0.908004	protective	NA
KEGG_SNARE_INTERACTIONS_IN_VESICULAR_TRANSPORT	REACTOME_L1CAM_INTERACTIONS	rs2236359	1	227747743	SNAP47	rs1354680	4	112997421	ANK2	dominant	0.301153	0.318706	0.850099	0.921192	protective	NA
KEGG_SNARE_INTERACTIONS_IN_VESICULAR_TRANSPORT	REACTOME_L1CAM_INTERACTIONS	rs1078004	2	85542588	VAMP5/VAMP8	rs3759786	15	66337065	MAP2K1	dominant	0.173521	0.192076	0.849917	0.883112	protective	NA
KEGG_SNARE_INTERACTIONS_IN_VESICULAR_TRANSPORT	REACTOME_L1CAM_INTERACTIONS	rs11167136	8	142229454	TSNARE1	rs1201689	15	41813720	SPTBN5	dominant	0.423019	0.443079	0.849746	0.921532	protective	NA
KEGG_SNARE_INTERACTIONS_IN_VESICULAR_TRANSPORT	REACTOME_L1CAM_INTERACTIONS	rs2236359	1	227747743	SNAP47	rs267561	3	37533460	ITGA9	dominant	0.432297	0.450853	0.846883	0.927503	protective	NA
KEGG_SNARE_INTERACTIONS_IN_VESICULAR_TRANSPORT	REACTOME_L1CAM_INTERACTIONS	rs10849451	12	6415513	VAMP1	rs10810812	9	17586103	SH3GL2	dominant	0.461133	0.483952	0.846635	0.912501	protective	NA
KEGG_SNARE_INTERACTIONS_IN_VESICULAR_TRANSPORT	REACTOME_L1CAM_INTERACTIONS	rs1078004	2	85542588	VAMP5/VAMP8	rs2229866	1	205061988	CNTN2/NFASC	dominant	0.387663	0.409478	0.845645	0.912995	protective	NA
KEGG_SNARE_INTERACTIONS_IN_VESICULAR_TRANSPORT	REACTOME_L1CAM_INTERACTIONS	rs4908482	1	7817428	VAMP3	rs34162626	6	13611846	RANBP9	dominant	0.0651956	0.0764794	0.843848	0.842169	protective	NA
KEGG_SNARE_INTERACTIONS_IN_VESICULAR_TRANSPORT	REACTOME_L1CAM_INTERACTIONS	rs2908290	7	44176538	YKT6	rs1978973	3	105622370	ALCAM	dominant	0.0882648	0.101304	0.843538	0.858826	protective	NA
KEGG_SNARE_INTERACTIONS_IN_VESICULAR_TRANSPORT	REACTOME_L1CAM_INTERACTIONS	rs10902112	11	244106	BET1L	rs6066384	20	37443196	SRC	dominant	0.318205	0.335757	0.841253	0.923323	protective	NA
KEGG_SNARE_INTERACTIONS_IN_VESICULAR_TRANSPORT	REACTOME_L1CAM_INTERACTIONS	rs891203	19	17227073	USE1	rs3768781	2	186617108	ITGAV	dominant	0.0900201	0.102558	0.840852	0.865657	protective	NA
KEGG_SNARE_INTERACTIONS_IN_VESICULAR_TRANSPORT	REACTOME_L1CAM_INTERACTIONS	rs12440118	15	42451896	SNAP23	rs11604757	11	1029320	AP2A2	dominant	0.057673	0.0684554	0.836482	0.832851	protective	NA
KEGG_SNARE_INTERACTIONS_IN_VESICULAR_TRANSPORT	REACTOME_L1CAM_INTERACTIONS	rs10902112	11	244106	BET1L	rs71377306	17	47347921	ITGB3	dominant	0.0443831	0.0551655	0.836315	0.795468	protective	NA
KEGG_SNARE_INTERACTIONS_IN_VESICULAR_TRANSPORT	REACTOME_L1CAM_INTERACTIONS	rs6026468	20	58715291	STX16	rs41273499	1	158562824	SPTA1	dominant	0.0875125	0.0995486	0.835147	0.867498	protective	NA
KEGG_SNARE_INTERACTIONS_IN_VESICULAR_TRANSPORT	REACTOME_L1CAM_INTERACTIONS	rs1411478	1	180993146	STX6	rs1978973	3	105622370	ALCAM	dominant	0.0987964	0.112337	0.835069	0.86625	protective	NA
KEGG_SNARE_INTERACTIONS_IN_VESICULAR_TRANSPORT	REACTOME_L1CAM_INTERACTIONS	rs718097	17	9212088	STX8	rs16951095	18	7042912	LAMA1	dominant	0.084002	0.0957874	0.831302	0.86568	protective	NA
KEGG_SNARE_INTERACTIONS_IN_VESICULAR_TRANSPORT	REACTOME_L1CAM_INTERACTIONS	rs25680	12	6445462	VAMP1	rs3808564	8	26581030	DPYSL2	dominant	0.271063	0.291374	0.830457	0.904371	protective	NA
KEGG_SNARE_INTERACTIONS_IN_VESICULAR_TRANSPORT	REACTOME_L1CAM_INTERACTIONS	rs718097	17	9212088	STX8	rs2521988	17	7252542	DLG4	dominant	0.182798	0.198094	0.83015	0.905513	protective	NA
KEGG_SNARE_INTERACTIONS_IN_VESICULAR_TRANSPORT	REACTOME_L1CAM_INTERACTIONS	rs2236359	1	227747743	SNAP47	rs280371	12	41114842	CNTN1	dominant	0.111836	0.125376	0.826561	0.878401	protective	NA
KEGG_SNARE_INTERACTIONS_IN_VESICULAR_TRANSPORT	REACTOME_L1CAM_INTERACTIONS	rs1078004	2	85542588	VAMP5/VAMP8	rs13164431	5	52868086	ITGA1	dominant	0.466148	0.488465	0.826499	0.914418	protective	NA
KEGG_SNARE_INTERACTIONS_IN_VESICULAR_TRANSPORT	REACTOME_L1CAM_INTERACTIONS	rs10902112	11	244106	BET1L	rs11979158	7	55091656	EGFR	dominant	0.116851	0.129388	0.826082	0.89028	protective	NA
KEGG_SNARE_INTERACTIONS_IN_VESICULAR_TRANSPORT	REACTOME_L1CAM_INTERACTIONS	rs1078004	2	85542588	VAMP5/VAMP8	rs6699312	1	171836182	DNM3	dominant	0.503009	0.525577	0.823958	0.913602	protective	NA
KEGG_SNARE_INTERACTIONS_IN_VESICULAR_TRANSPORT	REACTOME_L1CAM_INTERACTIONS	rs11583530	1	171708037	VAMP4	rs17121881	11	118210630	SCN2B	dominant	0.344032	0.363089	0.823203	0.919987	protective	NA
KEGG_SNARE_INTERACTIONS_IN_VESICULAR_TRANSPORT	REACTOME_L1CAM_INTERACTIONS	rs2236359	1	227747743	SNAP47	rs12344583	9	133858398	VAV2	dominant	0.226429	0.242728	0.821326	0.913196	protective	NA
KEGG_SNARE_INTERACTIONS_IN_VESICULAR_TRANSPORT	REACTOME_L1CAM_INTERACTIONS	rs891203	19	17227073	USE1	rs850731	17	44376902	ITGA2B	dominant	0.146189	0.160732	0.817597	0.894024	protective	NA
KEGG_SNARE_INTERACTIONS_IN_VESICULAR_TRANSPORT	REACTOME_L1CAM_INTERACTIONS	rs891203	19	17227073	USE1	rs155409	3	1313582	CNTN6	dominant	0.054664	0.0651956	0.813496	0.829121	protective	NA
KEGG_SNARE_INTERACTIONS_IN_VESICULAR_TRANSPORT	REACTOME_L1CAM_INTERACTIONS	rs891203	19	17227073	USE1	rs11549015	15	41943118	SPTBN5	dominant	0.0589268	0.0697091	0.809136	0.835638	protective	NA
KEGG_SNARE_INTERACTIONS_IN_VESICULAR_TRANSPORT	REACTOME_L1CAM_INTERACTIONS	rs3795504	1	180936312	STX6	rs20559	1	183130425	LAMC1	dominant	0.0697091	0.0807422	0.808125	0.853115	protective	NA
KEGG_SNARE_INTERACTIONS_IN_VESICULAR_TRANSPORT	REACTOME_L1CAM_INTERACTIONS	rs10849451	12	6415513	VAMP1	rs353116	2	165277122	SCN2A	dominant	0.452106	0.475928	0.806653	0.908645	protective	NA
KEGG_SNARE_INTERACTIONS_IN_VESICULAR_TRANSPORT	REACTOME_L1CAM_INTERACTIONS	rs891203	19	17227073	USE1	rs11604757	11	1029320	AP2A2	dominant	0.0411234	0.050652	0.80321	0.803813	protective	NA
KEGG_SNARE_INTERACTIONS_IN_VESICULAR_TRANSPORT	REACTOME_L1CAM_INTERACTIONS	rs2286845	7	93994146	BET1	rs3816533	15	41841899	SPTBN5	dominant	0.148947	0.164744	0.800041	0.887327	protective	NA
KEGG_SNARE_INTERACTIONS_IN_VESICULAR_TRANSPORT	REACTOME_L1CAM_INTERACTIONS	rs891203	19	17227073	USE1	rs2298771	2	166036278	SCN1A	dominant	0.119609	0.133149	0.799883	0.884489	protective	NA
KEGG_SNARE_INTERACTIONS_IN_VESICULAR_TRANSPORT	REACTOME_L1CAM_INTERACTIONS	rs9676419	19	17256626	USE1	rs28568406	1	158717373	SPTA1	dominant	0.235707	0.255015	0.794157	0.900937	protective	NA
KEGG_SNARE_INTERACTIONS_IN_VESICULAR_TRANSPORT	REACTOME_L1CAM_INTERACTIONS	rs891203	19	17227073	USE1	rs4916245	1	172236886	DNM3	dominant	0.149699	0.164243	0.792969	0.895861	protective	NA
KEGG_SNARE_INTERACTIONS_IN_VESICULAR_TRANSPORT	REACTOME_L1CAM_INTERACTIONS	rs25680	12	6445462	VAMP1	rs7006290	8	41757620	ANK1	dominant	0.20988	0.228435	0.785395	0.897194	protective	NA
KEGG_SNARE_INTERACTIONS_IN_VESICULAR_TRANSPORT	REACTOME_L1CAM_INTERACTIONS	rs17851681	1	227766976	SNAP47	rs62587579	9	137216103	TUBB4B	dominant	0.0178034	0.025326	0.784136	0.697586	protective	NA
KEGG_SNARE_INTERACTIONS_IN_VESICULAR_TRANSPORT	REACTOME_L1CAM_INTERACTIONS	rs25680	12	6445462	VAMP1	rs607230	18	6980524	LAMA1	dominant	0.191575	0.209629	0.783143	0.893466	protective	NA
KEGG_SNARE_INTERACTIONS_IN_VESICULAR_TRANSPORT	REACTOME_L1CAM_INTERACTIONS	rs3736946	10	112409518	VTI1A	rs741842	14	73251012	NUMB	dominant	0.0466399	0.0554162	0.781863	0.833881	protective	NA
KEGG_SNARE_INTERACTIONS_IN_VESICULAR_TRANSPORT	REACTOME_L1CAM_INTERACTIONS	rs25680	12	6445462	VAMP1	rs6018027	20	37362389	SRC	dominant	0.174273	0.191825	0.781349	0.889185	protective	NA
KEGG_SNARE_INTERACTIONS_IN_VESICULAR_TRANSPORT	REACTOME_L1CAM_INTERACTIONS	rs25680	12	6445462	VAMP1	rs151361	20	59038947	TUBB1	dominant	0.150953	0.167753	0.77575	0.882045	protective	NA
KEGG_SNARE_INTERACTIONS_IN_VESICULAR_TRANSPORT	REACTOME_L1CAM_INTERACTIONS	rs362988	20	10300722	SNAP25	rs11979158	7	55091656	EGFR	dominant	0.179037	0.194082	0.773486	0.905575	protective	NA
KEGG_SNARE_INTERACTIONS_IN_VESICULAR_TRANSPORT	REACTOME_L1CAM_INTERACTIONS	rs1078004	2	85542588	VAMP5/VAMP8	rs2058194	17	63942988	SCN4A	dominant	0.476931	0.498997	0.77326	0.915458	protective	NA
KEGG_SNARE_INTERACTIONS_IN_VESICULAR_TRANSPORT	REACTOME_L1CAM_INTERACTIONS	rs891203	19	17227073	USE1	rs2209440	9	17736344	SH3GL2	dominant	0.154213	0.169759	0.772625	0.891722	protective	NA
KEGG_SNARE_INTERACTIONS_IN_VESICULAR_TRANSPORT	REACTOME_L1CAM_INTERACTIONS	rs2286845	7	93994146	BET1	rs746463	11	110125219	RDX	dominant	0.301153	0.319709	0.771475	0.91695	protective	NA
KEGG_SNARE_INTERACTIONS_IN_VESICULAR_TRANSPORT	REACTOME_L1CAM_INTERACTIONS	rs362988	20	10300722	SNAP25	rs34789048	9	36169726	CLTA	dominant	0.104313	0.117101	0.770649	0.878074	protective	NA
KEGG_SNARE_INTERACTIONS_IN_VESICULAR_TRANSPORT	REACTOME_L1CAM_INTERACTIONS	rs891203	19	17227073	USE1	rs11579366	1	145872788	ITGA10	dominant	0.131143	0.147944	0.769142	0.8693	protective	NA
KEGG_SNARE_INTERACTIONS_IN_VESICULAR_TRANSPORT	REACTOME_L1CAM_INTERACTIONS	rs11583530	1	171708037	VAMP4	rs3759786	15	66337065	MAP2K1	dominant	0.129137	0.143681	0.767855	0.883769	protective	NA
KEGG_SNARE_INTERACTIONS_IN_VESICULAR_TRANSPORT	REACTOME_L1CAM_INTERACTIONS	rs41278952	1	7737443	VAMP3	rs17183814	2	165295879	SCN2A	dominant	0.0285858	0.0353561	0.767294	0.802876	protective	NA
KEGG_SNARE_INTERACTIONS_IN_VESICULAR_TRANSPORT	REACTOME_L1CAM_INTERACTIONS	rs25680	12	6445462	VAMP1	rs2209440	9	17736344	SH3GL2	dominant	0.284353	0.304664	0.765957	0.906844	protective	NA
KEGG_SNARE_INTERACTIONS_IN_VESICULAR_TRANSPORT	REACTOME_L1CAM_INTERACTIONS	rs4908482	1	7817428	VAMP3	rs1801106	5	53062927	ITGA2	dominant	0.101304	0.113842	0.765612	0.877453	protective	NA
KEGG_SNARE_INTERACTIONS_IN_VESICULAR_TRANSPORT	REACTOME_L1CAM_INTERACTIONS	rs891203	19	17227073	USE1	rs59038848	3	197336197	DLG1	dominant	0.0980441	0.110582	0.764653	0.874297	protective	NA
KEGG_SNARE_INTERACTIONS_IN_VESICULAR_TRANSPORT	REACTOME_L1CAM_INTERACTIONS	rs1411478	1	180993146	STX6	rs1805007	16	89919709	TUBB3	dominant	0.0784855	0.0892678	0.761018	0.868926	protective	NA
KEGG_SNARE_INTERACTIONS_IN_VESICULAR_TRANSPORT	REACTOME_L1CAM_INTERACTIONS	rs41278952	1	7737443	VAMP3	rs28568406	1	158717373	SPTA1	dominant	0.140421	0.157222	0.759523	0.875686	protective	NA
KEGG_SNARE_INTERACTIONS_IN_VESICULAR_TRANSPORT	REACTOME_L1CAM_INTERACTIONS	rs3795504	1	180936312	STX6	rs11009235	10	33132620	NRP1	dominant	0.357823	0.376881	0.759307	0.921259	protective	NA
KEGG_SNARE_INTERACTIONS_IN_VESICULAR_TRANSPORT	REACTOME_L1CAM_INTERACTIONS	rs1195569	12	130740926	STX2	rs7694725	4	113079800	ANK2	dominant	0.241725	0.260532	0.759274	0.904804	protective	NA
KEGG_SNARE_INTERACTIONS_IN_VESICULAR_TRANSPORT	REACTOME_L1CAM_INTERACTIONS	rs2908290	7	44176538	YKT6	rs10810812	9	17586103	SH3GL2	dominant	0.372869	0.394183	0.75796	0.91378	protective	NA
KEGG_SNARE_INTERACTIONS_IN_VESICULAR_TRANSPORT	REACTOME_L1CAM_INTERACTIONS	rs891203	19	17227073	USE1	rs607230	18	6980524	LAMA1	dominant	0.105316	0.118104	0.755301	0.878974	protective	NA
KEGG_SNARE_INTERACTIONS_IN_VESICULAR_TRANSPORT	REACTOME_L1CAM_INTERACTIONS	rs2236359	1	227747743	SNAP47	rs34162626	6	13611846	RANBP9	dominant	0.0672016	0.0784855	0.754799	0.845872	protective	NA
KEGG_SNARE_INTERACTIONS_IN_VESICULAR_TRANSPORT	REACTOME_L1CAM_INTERACTIONS	rs11583530	1	171708037	VAMP4	rs240049	22	21906236	MAPK1	dominant	0.379388	0.398445	0.75465	0.922933	protective	NA
KEGG_SNARE_INTERACTIONS_IN_VESICULAR_TRANSPORT	REACTOME_L1CAM_INTERACTIONS	rs11583530	1	171708037	VAMP4	rs41273499	1	158562824	SPTA1	dominant	0.0659478	0.0777332	0.752284	0.837683	protective	NA
KEGG_SNARE_INTERACTIONS_IN_VESICULAR_TRANSPORT	REACTOME_L1CAM_INTERACTIONS	rs17564	12	130821769	STX2	rs2507941	3	37494565	ITGA9	dominant	0.055667	0.0651956	0.748719	0.845231	protective	NA
KEGG_SNARE_INTERACTIONS_IN_VESICULAR_TRANSPORT	REACTOME_L1CAM_INTERACTIONS	rs1195569	12	130740926	STX2	rs1201689	15	41813720	SPTBN5	dominant	0.445336	0.464895	0.747234	0.92415	protective	NA
KEGG_SNARE_INTERACTIONS_IN_VESICULAR_TRANSPORT	REACTOME_L1CAM_INTERACTIONS	rs25680	12	6445462	VAMP1	rs662471	18	7008592	LAMA1	dominant	0.189569	0.207372	0.746262	0.894066	protective	NA
KEGG_SNARE_INTERACTIONS_IN_VESICULAR_TRANSPORT	REACTOME_L1CAM_INTERACTIONS	rs891203	19	17227073	USE1	rs3739609	9	36169601	CLTA	dominant	0.141675	0.155717	0.743424	0.894938	protective	NA
KEGG_SNARE_INTERACTIONS_IN_VESICULAR_TRANSPORT	REACTOME_L1CAM_INTERACTIONS	rs1078004	2	85542588	VAMP5/VAMP8	rs3826408	17	7197973	DLG4	dominant	0.502508	0.524574	0.740777	0.915446	protective	NA
KEGG_SNARE_INTERACTIONS_IN_VESICULAR_TRANSPORT	REACTOME_L1CAM_INTERACTIONS	rs2908290	7	44176538	YKT6	rs2293079	2	219236065	TUBA4A/TUBA4B	dominant	0.140421	0.157222	0.739797	0.875686	protective	NA
KEGG_SNARE_INTERACTIONS_IN_VESICULAR_TRANSPORT	REACTOME_L1CAM_INTERACTIONS	rs4908482	1	7817428	VAMP3	rs41273499	1	158562824	SPTA1	dominant	0.07999	0.0915246	0.739737	0.863015	protective	NA
KEGG_SNARE_INTERACTIONS_IN_VESICULAR_TRANSPORT	REACTOME_L1CAM_INTERACTIONS	rs25680	12	6445462	VAMP1	rs3813563	14	73492108	NUMB	dominant	0.270812	0.290622	0.735071	0.906523	protective	NA
KEGG_SNARE_INTERACTIONS_IN_VESICULAR_TRANSPORT	REACTOME_L1CAM_INTERACTIONS	rs2532500	12	6453644	VAMP1	rs11071896	15	66528912	MAP2K1	dominant	0.246489	0.263541	0.734805	0.914135	protective	NA
KEGG_SNARE_INTERACTIONS_IN_VESICULAR_TRANSPORT	REACTOME_L1CAM_INTERACTIONS	rs25680	12	6445462	VAMP1	rs17346452	1	172084147	DNM3	dominant	0.182798	0.200351	0.734555	0.892793	protective	NA
KEGG_SNARE_INTERACTIONS_IN_VESICULAR_TRANSPORT	REACTOME_L1CAM_INTERACTIONS	rs891203	19	17227073	USE1	rs7296288	12	49086185	TUBA1B	dominant	0.151454	0.165747	0.726741	0.898376	protective	NA
KEGG_SNARE_INTERACTIONS_IN_VESICULAR_TRANSPORT	REACTOME_L1CAM_INTERACTIONS	rs11583530	1	171708037	VAMP4	rs1290018	11	123674468	SCN3B	dominant	0.335005	0.35331	0.726689	0.92209	protective	NA
KEGG_SNARE_INTERACTIONS_IN_VESICULAR_TRANSPORT	REACTOME_L1CAM_INTERACTIONS	rs10100935	8	142344359	TSNARE1	rs197770	3	37474336	ITGA9	dominant	0.147192	0.161234	0.726649	0.897877	protective	NA
KEGG_SNARE_INTERACTIONS_IN_VESICULAR_TRANSPORT	REACTOME_L1CAM_INTERACTIONS	rs10521157	17	9433053	STX8	rs34083785	8	132513765	KCNQ3	dominant	0.236459	0.253009	0.726376	0.914332	protective	NA
KEGG_SNARE_INTERACTIONS_IN_VESICULAR_TRANSPORT	REACTOME_L1CAM_INTERACTIONS	rs2286845	7	93994146	BET1	rs12939821	17	64001926	SCN4A	dominant	0.394684	0.413992	0.726272	0.922952	protective	NA
KEGG_SNARE_INTERACTIONS_IN_VESICULAR_TRANSPORT	REACTOME_L1CAM_INTERACTIONS	rs25680	12	6445462	VAMP1	rs28407527	9	137233633	TUBB4B	dominant	0.252758	0.272066	0.724945	0.905027	protective	NA
KEGG_SNARE_INTERACTIONS_IN_VESICULAR_TRANSPORT	REACTOME_L1CAM_INTERACTIONS	rs10462024	17	8148321	VAMP2	rs41273499	1	158562824	SPTA1	dominant	0.0915246	0.10331	0.724039	0.87443	protective	NA
KEGG_SNARE_INTERACTIONS_IN_VESICULAR_TRANSPORT	REACTOME_L1CAM_INTERACTIONS	rs11583530	1	171708037	VAMP4	rs151361	20	59038947	TUBB1	dominant	0.197342	0.21339	0.721565	0.906304	protective	NA
KEGG_SNARE_INTERACTIONS_IN_VESICULAR_TRANSPORT	REACTOME_L1CAM_INTERACTIONS	rs2551799	17	9297594	STX8	rs11604757	11	1029320	AP2A2	dominant	0.139669	0.15346	0.718467	0.895541	protective	NA
KEGG_SNARE_INTERACTIONS_IN_VESICULAR_TRANSPORT	REACTOME_L1CAM_INTERACTIONS	rs891203	19	17227073	USE1	rs597503	18	6939948	LAMA1	dominant	0.052658	0.0626881	0.716752	0.831106	protective	NA
KEGG_SNARE_INTERACTIONS_IN_VESICULAR_TRANSPORT	REACTOME_L1CAM_INTERACTIONS	rs10760706	9	99961410	STX17	rs34162626	6	13611846	RANBP9	dominant	0.060682	0.0717151	0.714572	0.836215	protective	NA
KEGG_SNARE_INTERACTIONS_IN_VESICULAR_TRANSPORT	REACTOME_L1CAM_INTERACTIONS	rs891203	19	17227073	USE1	rs16915157	10	60586880	ANK3	dominant	0.0752257	0.0865095	0.71457	0.858955	protective	NA
KEGG_SNARE_INTERACTIONS_IN_VESICULAR_TRANSPORT	REACTOME_L1CAM_INTERACTIONS	rs25680	12	6445462	VAMP1	rs9347144	6	166665623	RPS6KA2	dominant	0.244985	0.264042	0.71387	0.904406	protective	NA
KEGG_SNARE_INTERACTIONS_IN_VESICULAR_TRANSPORT	REACTOME_L1CAM_INTERACTIONS	rs1356732950	6	132538470	STX7	rs7911953	10	60031281	ANK3	dominant	0.0722166	0.0824975	0.713617	0.86568	protective	NA
KEGG_SNARE_INTERACTIONS_IN_VESICULAR_TRANSPORT	REACTOME_L1CAM_INTERACTIONS	rs891203	19	17227073	USE1	rs9288803	3	105413164	ALCAM	dominant	0.131645	0.145938	0.709954	0.887214	protective	NA
KEGG_SNARE_INTERACTIONS_IN_VESICULAR_TRANSPORT	REACTOME_L1CAM_INTERACTIONS	rs891203	19	17227073	USE1	rs12442525	15	41857308	SPTBN5	dominant	0.157472	0.172016	0.705564	0.899649	protective	NA
KEGG_SNARE_INTERACTIONS_IN_VESICULAR_TRANSPORT	REACTOME_L1CAM_INTERACTIONS	rs7216991	17	46974887	GOSR2	rs34789048	9	36169726	CLTA	dominant	0.115848	0.129137	0.704255	0.883603	protective	NA
KEGG_SNARE_INTERACTIONS_IN_VESICULAR_TRANSPORT	REACTOME_L1CAM_INTERACTIONS	rs10100935	8	142344359	TSNARE1	rs1201689	15	41813720	SPTBN5	dominant	0.343029	0.361334	0.703442	0.92289	protective	NA
KEGG_SNARE_INTERACTIONS_IN_VESICULAR_TRANSPORT	REACTOME_L1CAM_INTERACTIONS	rs2532500	12	6453644	VAMP1	rs1201689	15	41813720	SPTBN5	dominant	0.321214	0.339268	0.701855	0.921603	protective	NA
KEGG_SNARE_INTERACTIONS_IN_VESICULAR_TRANSPORT	REACTOME_L1CAM_INTERACTIONS	rs17564	12	130821769	STX2	rs20559	1	183130425	LAMC1	dominant	0.0549147	0.0646941	0.700119	0.840054	protective	NA
KEGG_SNARE_INTERACTIONS_IN_VESICULAR_TRANSPORT	REACTOME_L1CAM_INTERACTIONS	rs891203	19	17227073	USE1	rs11071896	15	66528912	MAP2K1	dominant	0.0992979	0.112337	0.699897	0.871132	protective	NA
KEGG_SNARE_INTERACTIONS_IN_VESICULAR_TRANSPORT	REACTOME_L1CAM_INTERACTIONS	rs2286845	7	93994146	BET1	rs4916245	1	172236886	DNM3	dominant	0.412487	0.431795	0.698429	0.92389	protective	NA
KEGG_SNARE_INTERACTIONS_IN_VESICULAR_TRANSPORT	REACTOME_L1CAM_INTERACTIONS	rs891203	19	17227073	USE1	rs12205572	6	166365976	RPS6KA2	dominant	0.0210632	0.028335	0.69725	0.737841	protective	NA
KEGG_SNARE_INTERACTIONS_IN_VESICULAR_TRANSPORT	REACTOME_L1CAM_INTERACTIONS	rs28494095	7	73683390	STX1A	rs10956647	8	132190597	KCNQ3	dominant	0.0699599	0.0802407	0.694943	0.862237	protective	NA
KEGG_SNARE_INTERACTIONS_IN_VESICULAR_TRANSPORT	REACTOME_L1CAM_INTERACTIONS	rs11583530	1	171708037	VAMP4	rs2298771	2	166036278	SCN1A	dominant	0.278586	0.295888	0.693886	0.918945	protective	NA
KEGG_SNARE_INTERACTIONS_IN_VESICULAR_TRANSPORT	REACTOME_L1CAM_INTERACTIONS	rs1195569	12	130740926	STX2	rs10510181	3	149364	CHL1	dominant	0.393932	0.412989	0.689755	0.923863	protective	NA
KEGG_SNARE_INTERACTIONS_IN_VESICULAR_TRANSPORT	REACTOME_L1CAM_INTERACTIONS	rs25680	12	6445462	VAMP1	rs11604757	11	1029320	AP2A2	dominant	0.086008	0.0997994	0.68799	0.848805	protective	NA
KEGG_SNARE_INTERACTIONS_IN_VESICULAR_TRANSPORT	REACTOME_L1CAM_INTERACTIONS	rs2908290	7	44176538	YKT6	rs1011731	1	172377408	DNM3	dominant	0.389669	0.40998	0.687773	0.918829	protective	NA
KEGG_SNARE_INTERACTIONS_IN_VESICULAR_TRANSPORT	REACTOME_L1CAM_INTERACTIONS	rs1042164	19	13153584	STX10	rs353116	2	165277122	SCN2A	dominant	0.171264	0.189819	0.687137	0.882044	protective	NA
KEGG_SNARE_INTERACTIONS_IN_VESICULAR_TRANSPORT	REACTOME_L1CAM_INTERACTIONS	rs10100935	8	142344359	TSNARE1	rs7694725	4	113079800	ANK2	dominant	0.184052	0.200853	0.686631	0.897487	protective	NA
KEGG_SNARE_INTERACTIONS_IN_VESICULAR_TRANSPORT	REACTOME_L1CAM_INTERACTIONS	rs891203	19	17227073	USE1	rs29302	4	113303436	ANK2	dominant	0.142177	0.155968	0.686595	0.89692	protective	NA
KEGG_SNARE_INTERACTIONS_IN_VESICULAR_TRANSPORT	REACTOME_L1CAM_INTERACTIONS	rs4908482	1	7817428	VAMP3	rs10510181	3	149364	CHL1	dominant	0.318455	0.33651	0.681277	0.92128	protective	NA
KEGG_SNARE_INTERACTIONS_IN_VESICULAR_TRANSPORT	REACTOME_L1CAM_INTERACTIONS	rs891203	19	17227073	USE1	rs61759822	9	137252821	TUBB4B	dominant	0.0436309	0.0529087	0.679276	0.816645	protective	NA
KEGG_SNARE_INTERACTIONS_IN_VESICULAR_TRANSPORT	REACTOME_L1CAM_INTERACTIONS	rs2286845	7	93994146	BET1	rs2721876	8	132515828	KCNQ3	dominant	0.311936	0.32999	0.677732	0.920485	protective	NA
KEGG_SNARE_INTERACTIONS_IN_VESICULAR_TRANSPORT	REACTOME_L1CAM_INTERACTIONS	rs2908290	7	44176538	YKT6	rs1201689	15	41813720	SPTBN5	dominant	0.360582	0.378887	0.677681	0.924443	protective	NA
KEGG_SNARE_INTERACTIONS_IN_VESICULAR_TRANSPORT	REACTOME_L1CAM_INTERACTIONS	rs1078004	2	85542588	VAMP5/VAMP8	rs2502731	9	128214278	DNM1	dominant	0.400953	0.421765	0.672417	0.917626	protective	NA
KEGG_SNARE_INTERACTIONS_IN_VESICULAR_TRANSPORT	REACTOME_L1CAM_INTERACTIONS	rs1545620	19	17192965	USE1	rs10810812	9	17586103	SH3GL2	dominant	0.397693	0.418756	0.671597	0.916489	protective	NA
KEGG_SNARE_INTERACTIONS_IN_VESICULAR_TRANSPORT	REACTOME_L1CAM_INTERACTIONS	rs11583530	1	171708037	VAMP4	rs2403730	8	132079891	KCNQ3	dominant	0.27332	0.290371	0.668233	0.919191	protective	NA
KEGG_SNARE_INTERACTIONS_IN_VESICULAR_TRANSPORT	REACTOME_L1CAM_INTERACTIONS	rs11246020	11	233067	BET1L	rs10510181	3	149364	CHL1	dominant	0.212387	0.228686	0.66759	0.909509	protective	NA
KEGG_SNARE_INTERACTIONS_IN_VESICULAR_TRANSPORT	REACTOME_L1CAM_INTERACTIONS	rs1128349	7	73683324	STX1A	rs694739	11	64329761	RPS6KA4	dominant	0.401204	0.425527	0.666999	0.904542	protective	NA
KEGG_SNARE_INTERACTIONS_IN_VESICULAR_TRANSPORT	REACTOME_L1CAM_INTERACTIONS	rs1078004	2	85542588	VAMP5/VAMP8	rs7616103	3	105586965	ALCAM	dominant	0.465396	0.48671	0.666412	0.918085	protective	NA
KEGG_SNARE_INTERACTIONS_IN_VESICULAR_TRANSPORT	REACTOME_L1CAM_INTERACTIONS	rs25680	12	6445462	VAMP1	rs2298771	2	166036278	SCN1A	dominant	0.215145	0.2332	0.666226	0.901358	protective	NA
KEGG_SNARE_INTERACTIONS_IN_VESICULAR_TRANSPORT	REACTOME_L1CAM_INTERACTIONS	rs891203	19	17227073	USE1	rs229587	14	64796582	SPTB	dominant	0.123872	0.136911	0.661797	0.891297	protective	NA
KEGG_SNARE_INTERACTIONS_IN_VESICULAR_TRANSPORT	REACTOME_L1CAM_INTERACTIONS	rs2286845	7	93994146	BET1	rs12344583	9	133858398	VAV2	dominant	0.205617	0.221916	0.661028	0.907543	protective	NA
KEGG_SNARE_INTERACTIONS_IN_VESICULAR_TRANSPORT	REACTOME_L1CAM_INTERACTIONS	rs891203	19	17227073	USE1	rs2804918	6	13584351	RANBP9	dominant	0.132397	0.145687	0.651526	0.894857	protective	NA
KEGG_SNARE_INTERACTIONS_IN_VESICULAR_TRANSPORT	REACTOME_L1CAM_INTERACTIONS	rs891203	19	17227073	USE1	rs6952125	7	6330563	RAC1	dominant	0.154714	0.168756	0.648169	0.901561	protective	NA
KEGG_SNARE_INTERACTIONS_IN_VESICULAR_TRANSPORT	REACTOME_L1CAM_INTERACTIONS	rs25680	12	6445462	VAMP1	rs10893053	11	123610273	SCN3B	dominant	0.199599	0.217151	0.648097	0.899011	protective	NA
KEGG_SNARE_INTERACTIONS_IN_VESICULAR_TRANSPORT	REACTOME_L1CAM_INTERACTIONS	rs891203	19	17227073	USE1	rs62244081	3	38771518	SCN10A	dominant	0.0930291	0.104814	0.645997	0.876027	protective	NA
KEGG_SNARE_INTERACTIONS_IN_VESICULAR_TRANSPORT	REACTOME_L1CAM_INTERACTIONS	rs2908290	7	44176538	YKT6	rs10510181	3	149364	CHL1	dominant	0.317954	0.335757	0.644782	0.922257	protective	NA
KEGG_SNARE_INTERACTIONS_IN_VESICULAR_TRANSPORT	REACTOME_L1CAM_INTERACTIONS	rs25680	12	6445462	VAMP1	rs584427	11	113233274	NCAM1	dominant	0.279338	0.298897	0.643371	0.9092	protective	NA
KEGG_SNARE_INTERACTIONS_IN_VESICULAR_TRANSPORT	REACTOME_L1CAM_INTERACTIONS	rs1078004	2	85542588	VAMP5/VAMP8	rs3816533	15	41841899	SPTBN5	dominant	0.178786	0.196339	0.641882	0.891137	protective	NA
KEGG_SNARE_INTERACTIONS_IN_VESICULAR_TRANSPORT	REACTOME_L1CAM_INTERACTIONS	rs1195569	12	130740926	STX2	rs34789048	9	36169726	CLTA	dominant	0.110331	0.122869	0.638529	0.885305	protective	NA
KEGG_SNARE_INTERACTIONS_IN_VESICULAR_TRANSPORT	REACTOME_L1CAM_INTERACTIONS	rs891203	19	17227073	USE1	rs280371	12	41114842	CNTN1	dominant	0.0358576	0.0443831	0.634148	0.800766	protective	NA
KEGG_SNARE_INTERACTIONS_IN_VESICULAR_TRANSPORT	REACTOME_L1CAM_INTERACTIONS	rs2551799	17	9297594	STX8	rs280371	12	41114842	CNTN1	dominant	0.108576	0.120863	0.633831	0.885958	protective	NA
KEGG_SNARE_INTERACTIONS_IN_VESICULAR_TRANSPORT	REACTOME_L1CAM_INTERACTIONS	rs3795504	1	180936312	STX6	rs11604757	11	1029320	AP2A2	dominant	0.151956	0.165747	0.632978	0.901883	protective	NA
KEGG_SNARE_INTERACTIONS_IN_VESICULAR_TRANSPORT	REACTOME_L1CAM_INTERACTIONS	rs10462024	17	8148321	VAMP2	rs10510181	3	149364	CHL1	dominant	0.345537	0.363591	0.628848	0.924128	protective	NA
KEGG_SNARE_INTERACTIONS_IN_VESICULAR_TRANSPORT	REACTOME_L1CAM_INTERACTIONS	rs718097	17	9212088	STX8	rs34789048	9	36169726	CLTA	dominant	0.111585	0.124122	0.623566	0.886303	protective	NA
KEGG_SNARE_INTERACTIONS_IN_VESICULAR_TRANSPORT	REACTOME_L1CAM_INTERACTIONS	rs6026468	20	58715291	STX16	rs34789048	9	36169726	CLTA	dominant	0.0960381	0.107823	0.612817	0.879085	protective	NA
KEGG_SNARE_INTERACTIONS_IN_VESICULAR_TRANSPORT	REACTOME_L1CAM_INTERACTIONS	rs891203	19	17227073	USE1	rs361557	22	18128456	TUBA8	dominant	0.0692076	0.0797392	0.608868	0.858104	protective	NA
KEGG_SNARE_INTERACTIONS_IN_VESICULAR_TRANSPORT	REACTOME_L1CAM_INTERACTIONS	rs25680	12	6445462	VAMP1	rs10956647	8	132190597	KCNQ3	dominant	0.189067	0.206118	0.606885	0.897988	protective	NA
KEGG_SNARE_INTERACTIONS_IN_VESICULAR_TRANSPORT	REACTOME_L1CAM_INTERACTIONS	rs2286845	7	93994146	BET1	rs1380453	10	60274597	ANK3	dominant	0.421264	0.44007	0.606397	0.926158	protective	NA
KEGG_SNARE_INTERACTIONS_IN_VESICULAR_TRANSPORT	REACTOME_L1CAM_INTERACTIONS	rs1078004	2	85542588	VAMP5/VAMP8	rs12344583	9	133858398	VAV2	dominant	0.243982	0.262538	0.605089	0.906513	protective	NA
KEGG_SNARE_INTERACTIONS_IN_VESICULAR_TRANSPORT	REACTOME_L1CAM_INTERACTIONS	rs1195569	12	130740926	STX2	rs20559	1	183130425	LAMC1	dominant	0.0762287	0.087011	0.604065	0.865855	protective	NA
KEGG_SNARE_INTERACTIONS_IN_VESICULAR_TRANSPORT	REACTOME_L1CAM_INTERACTIONS	rs11583530	1	171708037	VAMP4	rs17116710	5	155015898	KIF4B	dominant	0.162989	0.177533	0.603561	0.902127	protective	NA
KEGG_SNARE_INTERACTIONS_IN_VESICULAR_TRANSPORT	REACTOME_L1CAM_INTERACTIONS	rs891203	19	17227073	USE1	rs6598858	1	26583274	RPS6KA1	dominant	0.146189	0.159729	0.603393	0.900713	protective	NA
KEGG_SNARE_INTERACTIONS_IN_VESICULAR_TRANSPORT	REACTOME_L1CAM_INTERACTIONS	rs891203	19	17227073	USE1	rs2290647	19	35015825	SCN1B	dominant	0.125376	0.138164	0.597525	0.894173	protective	NA
KEGG_SNARE_INTERACTIONS_IN_VESICULAR_TRANSPORT	REACTOME_L1CAM_INTERACTIONS	rs362988	20	10300722	SNAP25	rs34282046	19	19194090	NCAN	dominant	0.0674524	0.0782347	0.597276	0.852211	protective	NA
KEGG_SNARE_INTERACTIONS_IN_VESICULAR_TRANSPORT	REACTOME_L1CAM_INTERACTIONS	rs1356732950	6	132538470	STX7	rs10510181	3	149364	CHL1	dominant	0.25326	0.269809	0.596606	0.917859	protective	NA
KEGG_SNARE_INTERACTIONS_IN_VESICULAR_TRANSPORT	REACTOME_L1CAM_INTERACTIONS	rs9676419	19	17256626	USE1	rs1978973	3	105622370	ALCAM	dominant	0.0559178	0.0661986	0.593416	0.835498	protective	NA
KEGG_SNARE_INTERACTIONS_IN_VESICULAR_TRANSPORT	REACTOME_L1CAM_INTERACTIONS	rs72878024	11	199492	BET1L	rs303819	12	51821318	SCN8A	dominant	0.0346038	0.0421264	0.578438	0.815028	protective	NA
KEGG_SNARE_INTERACTIONS_IN_VESICULAR_TRANSPORT	REACTOME_L1CAM_INTERACTIONS	rs72878024	11	199492	BET1L	rs361557	22	18128456	TUBA8	dominant	0.0463892	0.0549147	0.572991	0.837197	protective	NA
KEGG_SNARE_INTERACTIONS_IN_VESICULAR_TRANSPORT	REACTOME_L1CAM_INTERACTIONS	rs1078004	2	85542588	VAMP5/VAMP8	rs4733951	8	38512313	FGFR1	dominant	0.240471	0.258776	0.572805	0.906868	protective	NA
KEGG_SNARE_INTERACTIONS_IN_VESICULAR_TRANSPORT	REACTOME_L1CAM_INTERACTIONS	rs10849451	12	6415513	VAMP1	rs7694725	4	113079800	ANK2	dominant	0.23997	0.257773	0.564063	0.909127	protective	NA
KEGG_SNARE_INTERACTIONS_IN_VESICULAR_TRANSPORT	REACTOME_L1CAM_INTERACTIONS	rs1078004	2	85542588	VAMP5/VAMP8	rs10956647	8	132190597	KCNQ3	dominant	0.344784	0.364343	0.562187	0.91807	protective	NA
KEGG_SNARE_INTERACTIONS_IN_VESICULAR_TRANSPORT	REACTOME_L1CAM_INTERACTIONS	rs1411478	1	180993146	STX6	rs71377306	17	47347921	ITGB3	dominant	0.0631896	0.0747242	0.559407	0.835226	protective	NA
KEGG_SNARE_INTERACTIONS_IN_VESICULAR_TRANSPORT	REACTOME_L1CAM_INTERACTIONS	rs1078004	2	85542588	VAMP5/VAMP8	rs11129795	3	38547672	SCN5A	dominant	0.281846	0.300652	0.558594	0.912899	protective	NA
KEGG_SNARE_INTERACTIONS_IN_VESICULAR_TRANSPORT	REACTOME_L1CAM_INTERACTIONS	rs2286845	7	93994146	BET1	rs151361	20	59038947	TUBB1	dominant	0.228937	0.244985	0.557018	0.915044	protective	NA
KEGG_SNARE_INTERACTIONS_IN_VESICULAR_TRANSPORT	REACTOME_L1CAM_INTERACTIONS	rs3736946	10	112409518	VTI1A	rs10810812	9	17586103	SH3GL2	dominant	0.124875	0.140421	0.555872	0.873488	protective	NA
KEGG_SNARE_INTERACTIONS_IN_VESICULAR_TRANSPORT	REACTOME_L1CAM_INTERACTIONS	rs2286845	7	93994146	BET1	rs280371	12	41114842	CNTN1	dominant	0.104313	0.117352	0.549442	0.875949	protective	NA
KEGG_SNARE_INTERACTIONS_IN_VESICULAR_TRANSPORT	REACTOME_L1CAM_INTERACTIONS	rs10521157	17	9433053	STX8	rs1978973	3	105622370	ALCAM	dominant	0.0672016	0.077984	0.544946	0.851775	protective	NA
KEGG_SNARE_INTERACTIONS_IN_VESICULAR_TRANSPORT	REACTOME_L1CAM_INTERACTIONS	rs2286845	7	93994146	BET1	rs2303361	7	6409865	RAC1	dominant	0.219157	0.234955	0.543973	0.913893	protective	NA
KEGG_SNARE_INTERACTIONS_IN_VESICULAR_TRANSPORT	REACTOME_L1CAM_INTERACTIONS	rs2286845	7	93994146	BET1	rs1801106	5	53062927	ITGA2	dominant	0.105316	0.118355	0.542509	0.876862	protective	NA
KEGG_SNARE_INTERACTIONS_IN_VESICULAR_TRANSPORT	REACTOME_L1CAM_INTERACTIONS	rs4908482	1	7817428	VAMP3	rs62587579	9	137216103	TUBB4B	dominant	0.0531595	0.0624373	0.540148	0.843063	protective	NA
KEGG_SNARE_INTERACTIONS_IN_VESICULAR_TRANSPORT	REACTOME_L1CAM_INTERACTIONS	rs11583530	1	171708037	VAMP4	rs1805007	16	89919709	TUBB3	dominant	0.059679	0.0702106	0.53944	0.84048	protective	NA
KEGG_SNARE_INTERACTIONS_IN_VESICULAR_TRANSPORT	REACTOME_L1CAM_INTERACTIONS	rs25680	12	6445462	VAMP1	rs2293079	2	219236065	TUBA4A/TUBA4B	dominant	0.0930291	0.10682	0.534713	0.857649	protective	NA
KEGG_SNARE_INTERACTIONS_IN_VESICULAR_TRANSPORT	REACTOME_L1CAM_INTERACTIONS	rs2286845	7	93994146	BET1	rs2228479	16	89919532	TUBB3	dominant	0.0927783	0.105316	0.534252	0.868778	protective	NA
KEGG_SNARE_INTERACTIONS_IN_VESICULAR_TRANSPORT	REACTOME_L1CAM_INTERACTIONS	rs17564	12	130821769	STX2	rs10810812	9	17586103	SH3GL2	dominant	0.365848	0.385657	0.529994	0.919001	protective	NA
KEGG_SNARE_INTERACTIONS_IN_VESICULAR_TRANSPORT	REACTOME_L1CAM_INTERACTIONS	rs362988	20	10300722	SNAP25	rs20559	1	183130425	LAMC1	dominant	0.0682046	0.0782347	0.525602	0.862411	protective	NA
KEGG_SNARE_INTERACTIONS_IN_VESICULAR_TRANSPORT	REACTOME_L1CAM_INTERACTIONS	rs25680	12	6445462	VAMP1	rs3760238	17	63973168	SCN4A	dominant	0.28335	0.302407	0.521849	0.912066	protective	NA
KEGG_SNARE_INTERACTIONS_IN_VESICULAR_TRANSPORT	REACTOME_L1CAM_INTERACTIONS	rs2908290	7	44176538	YKT6	rs353116	2	165277122	SCN2A	dominant	0.366851	0.387914	0.52104	0.91424	protective	NA
KEGG_SNARE_INTERACTIONS_IN_VESICULAR_TRANSPORT	REACTOME_L1CAM_INTERACTIONS	rs1042164	19	13153584	STX10	rs71377306	17	47347921	ITGB3	dominant	0.0245737	0.0325978	0.519859	0.747645	protective	NA
KEGG_SNARE_INTERACTIONS_IN_VESICULAR_TRANSPORT	REACTOME_L1CAM_INTERACTIONS	rs17564	12	130821769	STX2	rs28568406	1	158717373	SPTA1	dominant	0.350802	0.37011	0.518517	0.919642	protective	NA
KEGG_SNARE_INTERACTIONS_IN_VESICULAR_TRANSPORT	REACTOME_L1CAM_INTERACTIONS	rs11583530	1	171708037	VAMP4	rs2276635	2	219222719	TUBA4A/TUBA4B	dominant	0.0885155	0.100301	0.517637	0.871089	protective	NA
KEGG_SNARE_INTERACTIONS_IN_VESICULAR_TRANSPORT	REACTOME_L1CAM_INTERACTIONS	rs6503235	17	9612460	STX8	rs41273499	1	158562824	SPTA1	dominant	0.0621866	0.0717151	0.517135	0.858322	protective	NA
KEGG_SNARE_INTERACTIONS_IN_VESICULAR_TRANSPORT	REACTOME_L1CAM_INTERACTIONS	rs1078004	2	85542588	VAMP5/VAMP8	rs229587	14	64796582	SPTB	dominant	0.401204	0.421013	0.516705	0.921423	protective	NA
KEGG_SNARE_INTERACTIONS_IN_VESICULAR_TRANSPORT	REACTOME_L1CAM_INTERACTIONS	rs25680	12	6445462	VAMP1	rs2502731	9	128214278	DNM1	dominant	0.217402	0.234704	0.51454	0.905804	protective	NA
KEGG_SNARE_INTERACTIONS_IN_VESICULAR_TRANSPORT	REACTOME_L1CAM_INTERACTIONS	rs10902112	11	244106	BET1L	rs353116	2	165277122	SCN2A	dominant	0.282347	0.302156	0.51359	0.908646	protective	NA
KEGG_SNARE_INTERACTIONS_IN_VESICULAR_TRANSPORT	REACTOME_L1CAM_INTERACTIONS	rs4908482	1	7817428	VAMP3	rs12205572	6	166365976	RPS6KA2	dominant	0.060682	0.0702106	0.508068	0.855518	protective	NA
KEGG_SNARE_INTERACTIONS_IN_VESICULAR_TRANSPORT	REACTOME_L1CAM_INTERACTIONS	rs10100935	8	142344359	TSNARE1	rs1978973	3	105622370	ALCAM	dominant	0.0837513	0.0952859	0.506025	0.867882	protective	NA
KEGG_SNARE_INTERACTIONS_IN_VESICULAR_TRANSPORT	REACTOME_L1CAM_INTERACTIONS	rs3027232	17	8118747	VAMP2	rs694739	11	64329761	RPS6KA4	dominant	0.217904	0.237964	0.497469	0.892214	protective	NA
KEGG_SNARE_INTERACTIONS_IN_VESICULAR_TRANSPORT	REACTOME_L1CAM_INTERACTIONS	rs72878024	11	199492	BET1L	rs28568406	1	158717373	SPTA1	dominant	0.0802407	0.0935306	0.496807	0.845513	protective	NA
KEGG_SNARE_INTERACTIONS_IN_VESICULAR_TRANSPORT	REACTOME_L1CAM_INTERACTIONS	rs41278952	1	7737443	VAMP3	rs41273499	1	158562824	SPTA1	dominant	0.0290873	0.0363591	0.496555	0.794008	protective	NA
KEGG_SNARE_INTERACTIONS_IN_VESICULAR_TRANSPORT	REACTOME_L1CAM_INTERACTIONS	rs1195569	12	130740926	STX2	rs10810812	9	17586103	SH3GL2	dominant	0.462638	0.48345	0.493415	0.919887	protective	NA
KEGG_SNARE_INTERACTIONS_IN_VESICULAR_TRANSPORT	REACTOME_L1CAM_INTERACTIONS	rs2908290	7	44176538	YKT6	rs71377306	17	47347921	ITGB3	dominant	0.0561685	0.0669509	0.491862	0.829367	protective	NA
KEGG_SNARE_INTERACTIONS_IN_VESICULAR_TRANSPORT	REACTOME_L1CAM_INTERACTIONS	rs72878024	11	199492	BET1L	rs10810812	9	17586103	SH3GL2	dominant	0.086008	0.0997994	0.491844	0.848805	protective	NA
KEGG_SNARE_INTERACTIONS_IN_VESICULAR_TRANSPORT	REACTOME_L1CAM_INTERACTIONS	rs362988	20	10300722	SNAP25	rs28568406	1	158717373	SPTA1	dominant	0.423019	0.443079	0.491381	0.921532	protective	NA
KEGG_SNARE_INTERACTIONS_IN_VESICULAR_TRANSPORT	REACTOME_L1CAM_INTERACTIONS	rs25680	12	6445462	VAMP1	rs1380453	10	60274597	ANK3	dominant	0.280592	0.299398	0.487097	0.912686	protective	NA
KEGG_SNARE_INTERACTIONS_IN_VESICULAR_TRANSPORT	REACTOME_L1CAM_INTERACTIONS	rs25680	12	6445462	VAMP1	rs11071896	15	66528912	MAP2K1	dominant	0.175777	0.191825	0.486149	0.898498	protective	NA
KEGG_SNARE_INTERACTIONS_IN_VESICULAR_TRANSPORT	REACTOME_L1CAM_INTERACTIONS	rs25680	12	6445462	VAMP1	rs3759786	15	66337065	MAP2K1	dominant	0.100301	0.113842	0.485126	0.867797	protective	NA
KEGG_SNARE_INTERACTIONS_IN_VESICULAR_TRANSPORT	REACTOME_L1CAM_INTERACTIONS	rs1078004	2	85542588	VAMP5/VAMP8	rs197770	3	37474336	ITGA9	dominant	0.184804	0.201605	0.483196	0.897775	protective	NA
KEGG_SNARE_INTERACTIONS_IN_VESICULAR_TRANSPORT	REACTOME_L1CAM_INTERACTIONS	rs1078004	2	85542588	VAMP5/VAMP8	rs12961939	18	6997819	LAMA1	dominant	0.32322	0.342026	0.48148	0.918755	protective	NA
KEGG_SNARE_INTERACTIONS_IN_VESICULAR_TRANSPORT	REACTOME_L1CAM_INTERACTIONS	rs1078004	2	85542588	VAMP5/VAMP8	rs9841329	3	38646312	SCN5A	dominant	0.481444	0.501755	0.480303	0.921937	protective	NA
KEGG_SNARE_INTERACTIONS_IN_VESICULAR_TRANSPORT	REACTOME_L1CAM_INTERACTIONS	rs891203	19	17227073	USE1	rs1201689	15	41813720	SPTBN5	dominant	0.130391	0.143681	0.478639	0.893635	protective	NA
KEGG_SNARE_INTERACTIONS_IN_VESICULAR_TRANSPORT	REACTOME_L1CAM_INTERACTIONS	rs25680	12	6445462	VAMP1	rs1969253	3	184158724	AP2M1	dominant	0.282347	0.301153	0.477146	0.912983	protective	NA
KEGG_SNARE_INTERACTIONS_IN_VESICULAR_TRANSPORT	REACTOME_L1CAM_INTERACTIONS	rs25680	12	6445462	VAMP1	rs10875943	12	49282227	TUBA1C	dominant	0.187061	0.20336	0.475193	0.90141	protective	NA
KEGG_SNARE_INTERACTIONS_IN_VESICULAR_TRANSPORT	REACTOME_L1CAM_INTERACTIONS	rs72878024	11	199492	BET1L	rs34789048	9	36169726	CLTA	dominant	0.0183049	0.0245737	0.463857	0.740141	protective	NA
KEGG_SNARE_INTERACTIONS_IN_VESICULAR_TRANSPORT	REACTOME_L1CAM_INTERACTIONS	rs1078004	2	85542588	VAMP5/VAMP8	rs685870	11	64344456	RPS6KA4	dominant	0.359579	0.378636	0.461762	0.921409	protective	NA
KEGG_SNARE_INTERACTIONS_IN_VESICULAR_TRANSPORT	REACTOME_L1CAM_INTERACTIONS	rs25680	12	6445462	VAMP1	rs8018102	14	91023104	RPS6KA5	dominant	0.285105	0.303912	0.461171	0.91344	protective	NA
KEGG_SNARE_INTERACTIONS_IN_VESICULAR_TRANSPORT	REACTOME_L1CAM_INTERACTIONS	rs17564	12	130821769	STX2	rs1978973	3	105622370	ALCAM	dominant	0.087011	0.0985456	0.460517	0.871797	protective	NA
KEGG_SNARE_INTERACTIONS_IN_VESICULAR_TRANSPORT	REACTOME_L1CAM_INTERACTIONS	rs11246020	11	233067	BET1L	rs28568406	1	158717373	SPTA1	dominant	0.240471	0.257773	0.448298	0.911629	protective	NA
KEGG_SNARE_INTERACTIONS_IN_VESICULAR_TRANSPORT	REACTOME_L1CAM_INTERACTIONS	rs362988	20	10300722	SNAP25	rs2293079	2	219236065	TUBA4A/TUBA4B	dominant	0.162237	0.178786	0.448041	0.889507	protective	NA
KEGG_SNARE_INTERACTIONS_IN_VESICULAR_TRANSPORT	REACTOME_L1CAM_INTERACTIONS	rs1078004	2	85542588	VAMP5/VAMP8	rs6952125	7	6330563	RAC1	dominant	0.501755	0.522066	0.446461	0.921916	protective	NA
KEGG_SNARE_INTERACTIONS_IN_VESICULAR_TRANSPORT	REACTOME_L1CAM_INTERACTIONS	rs25680	12	6445462	VAMP1	rs2403730	8	132079891	KCNQ3	dominant	0.214393	0.231194	0.434927	0.907501	protective	NA
KEGG_SNARE_INTERACTIONS_IN_VESICULAR_TRANSPORT	REACTOME_L1CAM_INTERACTIONS	rs10521157	17	9433053	STX8	rs353116	2	165277122	SCN2A	dominant	0.264544	0.283601	0.433166	0.908632	protective	NA
KEGG_SNARE_INTERACTIONS_IN_VESICULAR_TRANSPORT	REACTOME_L1CAM_INTERACTIONS	rs1356732950	6	132538470	STX7	rs1978973	3	105622370	ALCAM	dominant	0.0702106	0.0807422	0.431243	0.859716	protective	NA
KEGG_SNARE_INTERACTIONS_IN_VESICULAR_TRANSPORT	REACTOME_L1CAM_INTERACTIONS	rs2286845	7	93994146	BET1	rs11599164	10	60072226	ANK3	dominant	0.115848	0.128636	0.428837	0.887559	protective	NA
KEGG_SNARE_INTERACTIONS_IN_VESICULAR_TRANSPORT	REACTOME_L1CAM_INTERACTIONS	rs11583530	1	171708037	VAMP4	rs2281053	6	166447508	RPS6KA2	dominant	0.0463892	0.055667	0.42547	0.825226	protective	NA
KEGG_SNARE_INTERACTIONS_IN_VESICULAR_TRANSPORT	REACTOME_L1CAM_INTERACTIONS	rs891203	19	17227073	USE1	rs11979158	7	55091656	EGFR	dominant	0.0554162	0.0644433	0.420331	0.851704	protective	NA
KEGG_SNARE_INTERACTIONS_IN_VESICULAR_TRANSPORT	REACTOME_L1CAM_INTERACTIONS	rs1411478	1	180993146	STX6	rs7694725	4	113079800	ANK2	dominant	0.222668	0.239218	0.416165	0.911	protective	NA
KEGG_SNARE_INTERACTIONS_IN_VESICULAR_TRANSPORT	REACTOME_L1CAM_INTERACTIONS	rs1078004	2	85542588	VAMP5/VAMP8	rs2776937	10	33317261	NRP1	dominant	0.296891	0.314945	0.410789	0.91847	protective	NA
KEGG_SNARE_INTERACTIONS_IN_VESICULAR_TRANSPORT	REACTOME_L1CAM_INTERACTIONS	rs9676419	19	17256626	USE1	rs10810812	9	17586103	SH3GL2	dominant	0.239218	0.25652	0.407037	0.911343	protective	NA
KEGG_SNARE_INTERACTIONS_IN_VESICULAR_TRANSPORT	REACTOME_L1CAM_INTERACTIONS	rs3795504	1	180936312	STX6	rs71377306	17	47347921	ITGB3	dominant	0.0654463	0.0767302	0.397658	0.842643	protective	NA
KEGG_SNARE_INTERACTIONS_IN_VESICULAR_TRANSPORT	REACTOME_L1CAM_INTERACTIONS	rs1078004	2	85542588	VAMP5/VAMP8	rs34789048	9	36169726	CLTA	dominant	0.104564	0.118857	0.394623	0.865704	protective	NA
KEGG_SNARE_INTERACTIONS_IN_VESICULAR_TRANSPORT	REACTOME_L1CAM_INTERACTIONS	rs10760706	9	99961410	STX17	rs694739	11	64329761	RPS6KA4	dominant	0.313942	0.335256	0.386906	0.907333	protective	NA
KEGG_SNARE_INTERACTIONS_IN_VESICULAR_TRANSPORT	REACTOME_L1CAM_INTERACTIONS	rs1078004	2	85542588	VAMP5/VAMP8	rs607230	18	6980524	LAMA1	dominant	0.337262	0.355567	0.380785	0.922321	protective	NA
KEGG_SNARE_INTERACTIONS_IN_VESICULAR_TRANSPORT	REACTOME_L1CAM_INTERACTIONS	rs17564	12	130821769	STX2	rs2293079	2	219236065	TUBA4A/TUBA4B	dominant	0.140171	0.155466	0.380289	0.885574	protective	NA
KEGG_SNARE_INTERACTIONS_IN_VESICULAR_TRANSPORT	REACTOME_L1CAM_INTERACTIONS	rs3795504	1	180936312	STX6	rs10810812	9	17586103	SH3GL2	dominant	0.438315	0.458124	0.378896	0.923017	protective	NA
KEGG_SNARE_INTERACTIONS_IN_VESICULAR_TRANSPORT	REACTOME_L1CAM_INTERACTIONS	rs362988	20	10300722	SNAP25	rs3759786	15	66337065	MAP2K1	dominant	0.178034	0.193581	0.376918	0.902294	protective	NA
KEGG_SNARE_INTERACTIONS_IN_VESICULAR_TRANSPORT	REACTOME_L1CAM_INTERACTIONS	rs1078004	2	85542588	VAMP5/VAMP8	rs226441	17	35706053	AP2B1	dominant	0.495486	0.515296	0.373078	0.923802	protective	NA
KEGG_SNARE_INTERACTIONS_IN_VESICULAR_TRANSPORT	REACTOME_L1CAM_INTERACTIONS	rs25680	12	6445462	VAMP1	rs1155741	3	37585621	ITGA9	dominant	0.227432	0.244233	0.371926	0.910961	protective	NA
KEGG_SNARE_INTERACTIONS_IN_VESICULAR_TRANSPORT	REACTOME_L1CAM_INTERACTIONS	rs10760706	9	99961410	STX17	rs28568406	1	158717373	SPTA1	dominant	0.329238	0.347292	0.363511	0.922498	protective	NA
KEGG_SNARE_INTERACTIONS_IN_VESICULAR_TRANSPORT	REACTOME_L1CAM_INTERACTIONS	rs72878024	11	199492	BET1L	rs11604757	11	1029320	AP2A2	dominant	0.029338	0.0363591	0.352617	0.80106	protective	NA
KEGG_SNARE_INTERACTIONS_IN_VESICULAR_TRANSPORT	REACTOME_L1CAM_INTERACTIONS	rs1411478	1	180993146	STX6	rs10810812	9	17586103	SH3GL2	dominant	0.41324	0.432548	0.351774	0.923925	protective	NA
KEGG_SNARE_INTERACTIONS_IN_VESICULAR_TRANSPORT	REACTOME_L1CAM_INTERACTIONS	rs72878024	11	199492	BET1L	rs20559	1	183130425	LAMC1	dominant	0.0117854	0.0168004	0.349402	0.697933	protective	NA
KEGG_SNARE_INTERACTIONS_IN_VESICULAR_TRANSPORT	REACTOME_L1CAM_INTERACTIONS	rs1078004	2	85542588	VAMP5/VAMP8	rs2804918	6	13584351	RANBP9	dominant	0.436058	0.455115	0.348353	0.925749	protective	NA
KEGG_SNARE_INTERACTIONS_IN_VESICULAR_TRANSPORT	REACTOME_L1CAM_INTERACTIONS	rs1078004	2	85542588	VAMP5/VAMP8	rs12019224	3	37473850	ITGA9	dominant	0.410231	0.429037	0.347755	0.925676	protective	NA
KEGG_SNARE_INTERACTIONS_IN_VESICULAR_TRANSPORT	REACTOME_L1CAM_INTERACTIONS	rs2532500	12	6453644	VAMP1	rs353116	2	165277122	SCN2A	dominant	0.331996	0.351555	0.347578	0.916715	protective	NA
KEGG_SNARE_INTERACTIONS_IN_VESICULAR_TRANSPORT	REACTOME_L1CAM_INTERACTIONS	rs6503235	17	9612460	STX8	rs353116	2	165277122	SCN2A	dominant	0.265296	0.283852	0.344861	0.911024	protective	NA
KEGG_SNARE_INTERACTIONS_IN_VESICULAR_TRANSPORT	REACTOME_L1CAM_INTERACTIONS	rs28494095	7	73683390	STX1A	rs34789048	9	36169726	CLTA	dominant	0.0213139	0.0275827	0.343625	0.767778	protective	NA
KEGG_SNARE_INTERACTIONS_IN_VESICULAR_TRANSPORT	REACTOME_L1CAM_INTERACTIONS	rs11246020	11	233067	BET1L	rs1354680	4	112997421	ANK2	dominant	0.190822	0.208375	0.342311	0.895899	protective	NA
KEGG_SNARE_INTERACTIONS_IN_VESICULAR_TRANSPORT	REACTOME_L1CAM_INTERACTIONS	rs1078004	2	85542588	VAMP5/VAMP8	rs12939821	17	64001926	SCN4A	dominant	0.468154	0.487462	0.337641	0.925525	protective	NA
KEGG_SNARE_INTERACTIONS_IN_VESICULAR_TRANSPORT	REACTOME_L1CAM_INTERACTIONS	rs1078004	2	85542588	VAMP5/VAMP8	rs1155741	3	37585621	ITGA9	dominant	0.418506	0.437312	0.335412	0.926045	protective	NA
KEGG_SNARE_INTERACTIONS_IN_VESICULAR_TRANSPORT	REACTOME_L1CAM_INTERACTIONS	rs11246020	11	233067	BET1L	rs2293079	2	219236065	TUBA4A/TUBA4B	dominant	0.0940321	0.107071	0.334684	0.86558	protective	NA
KEGG_SNARE_INTERACTIONS_IN_VESICULAR_TRANSPORT	REACTOME_L1CAM_INTERACTIONS	rs11246020	11	233067	BET1L	rs226441	17	35706053	AP2B1	dominant	0.27683	0.294634	0.334608	0.916443	protective	NA
KEGG_SNARE_INTERACTIONS_IN_VESICULAR_TRANSPORT	REACTOME_L1CAM_INTERACTIONS	rs25680	12	6445462	VAMP1	rs751024	1	22817501	EPHB2	dominant	0.127131	0.140923	0.3314	0.887881	protective	NA
KEGG_SNARE_INTERACTIONS_IN_VESICULAR_TRANSPORT	REACTOME_L1CAM_INTERACTIONS	rs25680	12	6445462	VAMP1	rs10483853	14	73289591	NUMB	dominant	0.135155	0.149198	0.329815	0.891174	protective	NA
KEGG_SNARE_INTERACTIONS_IN_VESICULAR_TRANSPORT	REACTOME_L1CAM_INTERACTIONS	rs10100935	8	142344359	TSNARE1	rs17116710	5	155015898	KIF4B	dominant	0.180792	0.197342	0.323234	0.897629	protective	NA
KEGG_SNARE_INTERACTIONS_IN_VESICULAR_TRANSPORT	REACTOME_L1CAM_INTERACTIONS	rs2551799	17	9297594	STX8	rs1978973	3	105622370	ALCAM	dominant	0.0970411	0.108576	0.317724	0.882347	protective	NA
KEGG_SNARE_INTERACTIONS_IN_VESICULAR_TRANSPORT	REACTOME_L1CAM_INTERACTIONS	rs1078004	2	85542588	VAMP5/VAMP8	rs11009235	10	33132620	NRP1	dominant	0.355567	0.373621	0.313449	0.925016	protective	NA
KEGG_SNARE_INTERACTIONS_IN_VESICULAR_TRANSPORT	REACTOME_L1CAM_INTERACTIONS	rs25680	12	6445462	VAMP1	rs197770	3	37474336	ITGA9	dominant	0.102558	0.115346	0.303227	0.876461	protective	NA
KEGG_SNARE_INTERACTIONS_IN_VESICULAR_TRANSPORT	REACTOME_L1CAM_INTERACTIONS	rs1078004	2	85542588	VAMP5/VAMP8	rs3808755	9	17616195	SH3GL2	dominant	0.413992	0.432548	0.302987	0.926795	protective	NA
KEGG_SNARE_INTERACTIONS_IN_VESICULAR_TRANSPORT	REACTOME_L1CAM_INTERACTIONS	rs25680	12	6445462	VAMP1	rs2977852	8	41631133	ANK1	dominant	0.277583	0.295386	0.30292	0.916569	protective	NA
KEGG_SNARE_INTERACTIONS_IN_VESICULAR_TRANSPORT	REACTOME_L1CAM_INTERACTIONS	rs1042164	19	13153584	STX10	rs1978973	3	105622370	ALCAM	dominant	0.0408726	0.0491474	0.300684	0.824458	protective	NA
KEGG_SNARE_INTERACTIONS_IN_VESICULAR_TRANSPORT	REACTOME_L1CAM_INTERACTIONS	rs25680	12	6445462	VAMP1	rs9288803	3	105413164	ALCAM	dominant	0.241976	0.258776	0.300035	0.914353	protective	NA
KEGG_SNARE_INTERACTIONS_IN_VESICULAR_TRANSPORT	REACTOME_L1CAM_INTERACTIONS	rs10462024	17	8148321	VAMP2	rs16851669	2	166149820	SCN1A/SCN9A	dominant	0.387914	0.406469	0.273348	0.925418	protective	NA
KEGG_SNARE_INTERACTIONS_IN_VESICULAR_TRANSPORT	REACTOME_L1CAM_INTERACTIONS	rs1356732950	6	132538470	STX7	rs10810812	9	17586103	SH3GL2	dominant	0.298897	0.316199	0.266005	0.921954	protective	NA
KEGG_SNARE_INTERACTIONS_IN_VESICULAR_TRANSPORT	REACTOME_L1CAM_INTERACTIONS	rs25680	12	6445462	VAMP1	rs746463	11	110125219	RDX	dominant	0.200853	0.216399	0.265267	0.910101	protective	NA
KEGG_SNARE_INTERACTIONS_IN_VESICULAR_TRANSPORT	REACTOME_L1CAM_INTERACTIONS	rs891203	19	17227073	USE1	rs6983315	8	38441901	FGFR1	dominant	0.144684	0.158977	0.259883	0.894886	protective	NA
KEGG_SNARE_INTERACTIONS_IN_VESICULAR_TRANSPORT	REACTOME_L1CAM_INTERACTIONS	rs1078004	2	85542588	VAMP5/VAMP8	rs2261033	6	31635814	CSNK2B	dominant	0.513541	0.532849	0.250696	0.925512	protective	NA
KEGG_SNARE_INTERACTIONS_IN_VESICULAR_TRANSPORT	REACTOME_L1CAM_INTERACTIONS	rs2286845	7	93994146	BET1	rs7831590	8	41689868	ANK1	dominant	0.0539117	0.0634403	0.249847	0.841244	protective	NA
KEGG_SNARE_INTERACTIONS_IN_VESICULAR_TRANSPORT	REACTOME_L1CAM_INTERACTIONS	rs25680	12	6445462	VAMP1	rs12344583	9	133858398	VAV2	dominant	0.133651	0.147192	0.239512	0.893815	protective	NA
KEGG_SNARE_INTERACTIONS_IN_VESICULAR_TRANSPORT	REACTOME_L1CAM_INTERACTIONS	rs1078004	2	85542588	VAMP5/VAMP8	rs11604757	11	1029320	AP2A2	dominant	0.154965	0.169759	0.22694	0.896869	protective	NA
KEGG_SNARE_INTERACTIONS_IN_VESICULAR_TRANSPORT	REACTOME_L1CAM_INTERACTIONS	rs718097	17	9212088	STX8	rs71377306	17	47347921	ITGB3	dominant	0.0679539	0.078987	0.218645	0.850133	protective	NA
KEGG_SNARE_INTERACTIONS_IN_VESICULAR_TRANSPORT	REACTOME_L1CAM_INTERACTIONS	rs25680	12	6445462	VAMP1	rs2290647	19	35015825	SCN1B	dominant	0.222166	0.237964	0.208257	0.914653	protective	NA
KEGG_SNARE_INTERACTIONS_IN_VESICULAR_TRANSPORT	REACTOME_L1CAM_INTERACTIONS	rs11246020	11	233067	BET1L	rs353116	2	165277122	SCN2A	dominant	0.252257	0.269809	0.207765	0.912997	protective	NA
KEGG_SNARE_INTERACTIONS_IN_VESICULAR_TRANSPORT	REACTOME_L1CAM_INTERACTIONS	rs2286845	7	93994146	BET1	rs6983315	8	38441901	FGFR1	dominant	0.388415	0.407472	0.207307	0.923528	protective	NA
BIOCARTA_RANKL_PATHWAY	REACTOME_COPI_MEDIATED_ANTEROGRADE_TRANSPORT	rs12895416	14	75291419	FOS	rs7694725	4	113079800	ANK2	dominant	0.178034	0.216399	4.84621	0.784312	protective	NA
BIOCARTA_RANKL_PATHWAY	REACTOME_COPI_MEDIATED_ANTEROGRADE_TRANSPORT	rs1051393	21	33241950	IFNAR2	rs11603023	11	118615352	ARCN1	dominant	0.35331	0.39669	4.40541	0.8309	protective	NA
BIOCARTA_RANKL_PATHWAY	REACTOME_COPI_MEDIATED_ANTEROGRADE_TRANSPORT	rs1051393	21	33241950	IFNAR2	rs2074404	17	46788073	NSF	dominant	0.22317	0.258275	3.80263	0.82503	protective	NA
BIOCARTA_RANKL_PATHWAY	REACTOME_COPI_MEDIATED_ANTEROGRADE_TRANSPORT	rs12895416	14	75291419	FOS	rs2286845	7	93994146	BET1	dominant	0.330241	0.369358	3.70612	0.841874	protective	NA
BIOCARTA_RANKL_PATHWAY	REACTOME_COPI_MEDIATED_ANTEROGRADE_TRANSPORT	rs12607917	18	62428753	TNFRSF11A	rs6356	11	2169721	INS	dominant	0.296389	0.330491	3.02973	0.853347	protective	NA
BIOCARTA_RANKL_PATHWAY	REACTOME_COPI_MEDIATED_ANTEROGRADE_TRANSPORT	rs1051393	21	33241950	IFNAR2	rs7694725	4	113079800	ANK2	dominant	0.171515	0.19985	3.02024	0.828866	protective	NA
BIOCARTA_RANKL_PATHWAY	REACTOME_COPI_MEDIATED_ANTEROGRADE_TRANSPORT	rs12895416	14	75291419	FOS	rs2723088	2	65072164	RAB1A	dominant	0.134152	0.159729	2.93775	0.815065	protective	NA
BIOCARTA_RANKL_PATHWAY	REACTOME_COPI_MEDIATED_ANTEROGRADE_TRANSPORT	rs1051393	21	33241950	IFNAR2	rs3016311	11	66324343	RAB1B	dominant	0.0912738	0.113089	2.76751	0.78772	protective	NA
BIOCARTA_RANKL_PATHWAY	REACTOME_COPI_MEDIATED_ANTEROGRADE_TRANSPORT	rs2866413	4	102635920	NFKB1	rs2293079	2	219236065	TUBA4A/TUBA4B	dominant	0.175527	0.202608	2.75494	0.83788	protective	NA
BIOCARTA_RANKL_PATHWAY	REACTOME_COPI_MEDIATED_ANTEROGRADE_TRANSPORT	rs12607917	18	62428753	TNFRSF11A	rs2274285	13	45529800	COG3	dominant	0.211635	0.240221	2.74185	0.849057	protective	NA
BIOCARTA_RANKL_PATHWAY	REACTOME_COPI_MEDIATED_ANTEROGRADE_TRANSPORT	rs3825584	14	24118430	IRF9	rs41273499	1	158562824	SPTA1	dominant	0.0646941	0.0822467	2.6197	0.771824	protective	NA
BIOCARTA_RANKL_PATHWAY	REACTOME_COPI_MEDIATED_ANTEROGRADE_TRANSPORT	rs34256674	18	62361984	TNFRSF11A	rs2723088	2	65072164	RAB1A	dominant	0.165998	0.192076	2.61869	0.837206	protective	NA
BIOCARTA_RANKL_PATHWAY	REACTOME_COPI_MEDIATED_ANTEROGRADE_TRANSPORT	rs12895416	14	75291419	FOS	rs1586861	3	139339654	COPB2	dominant	0.105065	0.126128	2.55792	0.813396	protective	NA
BIOCARTA_RANKL_PATHWAY	REACTOME_COPI_MEDIATED_ANTEROGRADE_TRANSPORT	rs12895416	14	75291419	FOS	rs3816533	15	41841899	SPTBN5	dominant	0.13992	0.16324	2.55553	0.833903	protective	NA
BIOCARTA_RANKL_PATHWAY	REACTOME_COPI_MEDIATED_ANTEROGRADE_TRANSPORT	rs1051393	21	33241950	IFNAR2	rs28568406	1	158717373	SPTA1	dominant	0.337011	0.368857	2.5431	0.869778	protective	NA
BIOCARTA_RANKL_PATHWAY	REACTOME_COPI_MEDIATED_ANTEROGRADE_TRANSPORT	rs12801636	11	65623846	RELA	rs13119659	4	75799732	USO1	dominant	0.209629	0.236961	2.54113	0.854064	protective	NA
BIOCARTA_RANKL_PATHWAY	REACTOME_COPI_MEDIATED_ANTEROGRADE_TRANSPORT	rs1051393	21	33241950	IFNAR2	rs8089027	18	10597877	NAPG	dominant	0.372367	0.404463	2.51628	0.873564	protective	NA
BIOCARTA_RANKL_PATHWAY	REACTOME_COPI_MEDIATED_ANTEROGRADE_TRANSPORT	rs12607917	18	62428753	TNFRSF11A	rs2286845	7	93994146	BET1	dominant	0.297643	0.327733	2.5101	0.869278	protective	NA
BIOCARTA_RANKL_PATHWAY	REACTOME_COPI_MEDIATED_ANTEROGRADE_TRANSPORT	rs12895416	14	75291419	FOS	rs2023685	7	107527890	COG5	dominant	0.152457	0.177031	2.46837	0.83622	protective	NA
BIOCARTA_RANKL_PATHWAY	REACTOME_COPI_MEDIATED_ANTEROGRADE_TRANSPORT	rs1051393	21	33241950	IFNAR2	rs1201689	15	41813720	SPTBN5	dominant	0.337262	0.367603	2.44574	0.87546	protective	NA
BIOCARTA_RANKL_PATHWAY	REACTOME_COPI_MEDIATED_ANTEROGRADE_TRANSPORT	rs12801636	11	65623846	RELA	rs6356	11	2169721	INS	dominant	0.227432	0.256269	2.44367	0.85435	protective	NA
BIOCARTA_RANKL_PATHWAY	REACTOME_COPI_MEDIATED_ANTEROGRADE_TRANSPORT	rs2866413	4	102635920	NFKB1	rs6356	11	2169721	INS	dominant	0.424774	0.45662	2.35901	0.878757	protective	NA
BIOCARTA_RANKL_PATHWAY	REACTOME_COPI_MEDIATED_ANTEROGRADE_TRANSPORT	rs1051393	21	33241950	IFNAR2	rs2023685	7	107527890	COG5	dominant	0.149198	0.172768	2.28839	0.839646	protective	NA
BIOCARTA_RANKL_PATHWAY	REACTOME_COPI_MEDIATED_ANTEROGRADE_TRANSPORT	rs1051393	21	33241950	IFNAR2	rs29302	4	113303436	ANK2	dominant	0.366851	0.397693	2.28397	0.877511	protective	NA
BIOCARTA_RANKL_PATHWAY	REACTOME_COPI_MEDIATED_ANTEROGRADE_TRANSPORT	rs2866413	4	102635920	NFKB1	rs41273499	1	158562824	SPTA1	dominant	0.0985456	0.117101	2.23555	0.824219	protective	NA
BIOCARTA_RANKL_PATHWAY	REACTOME_COPI_MEDIATED_ANTEROGRADE_TRANSPORT	rs12607917	18	62428753	TNFRSF11A	rs3757840	7	44191617	YKT6	dominant	0.373621	0.401956	2.19929	0.88746	protective	NA
BIOCARTA_RANKL_PATHWAY	REACTOME_COPI_MEDIATED_ANTEROGRADE_TRANSPORT	rs7589485	2	28422253	FOSL2	rs11603023	11	118615352	ARCN1	dominant	0.450351	0.480441	2.1925	0.886054	protective	NA
BIOCARTA_RANKL_PATHWAY	REACTOME_COPI_MEDIATED_ANTEROGRADE_TRANSPORT	rs7589485	2	28422253	FOSL2	rs2286845	7	93994146	BET1	dominant	0.400702	0.43004	2.18867	0.886164	protective	NA
BIOCARTA_RANKL_PATHWAY	REACTOME_COPI_MEDIATED_ANTEROGRADE_TRANSPORT	rs12895416	14	75291419	FOS	rs2274285	13	45529800	COG3	dominant	0.237212	0.262287	2.18048	0.874667	protective	NA
BIOCARTA_RANKL_PATHWAY	REACTOME_COPI_MEDIATED_ANTEROGRADE_TRANSPORT	rs2866413	4	102635920	NFKB1	rs3757840	7	44191617	YKT6	dominant	0.535356	0.564193	2.16059	0.889999	protective	NA
BIOCARTA_RANKL_PATHWAY	REACTOME_COPI_MEDIATED_ANTEROGRADE_TRANSPORT	rs7589485	2	28422253	FOSL2	rs2293079	2	219236065	TUBA4A/TUBA4B	dominant	0.16324	0.187061	2.15383	0.847811	protective	NA
BIOCARTA_RANKL_PATHWAY	REACTOME_COPI_MEDIATED_ANTEROGRADE_TRANSPORT	rs1051393	21	33241950	IFNAR2	rs62107586	19	6468320	TUBB4A	dominant	0.348796	0.376881	2.14728	0.885569	protective	NA
BIOCARTA_RANKL_PATHWAY	REACTOME_COPI_MEDIATED_ANTEROGRADE_TRANSPORT	rs12607917	18	62428753	TNFRSF11A	rs1201689	15	41813720	SPTBN5	dominant	0.310431	0.338265	2.14045	0.880674	protective	NA
BIOCARTA_RANKL_PATHWAY	REACTOME_COPI_MEDIATED_ANTEROGRADE_TRANSPORT	rs1051393	21	33241950	IFNAR2	rs11558606	1	230678922	COG2	dominant	0.0549147	0.0709629	2.12706	0.760711	protective	NA
BIOCARTA_RANKL_PATHWAY	REACTOME_COPI_MEDIATED_ANTEROGRADE_TRANSPORT	rs1051393	21	33241950	IFNAR2	rs2286845	7	93994146	BET1	dominant	0.317954	0.345787	2.10808	0.881983	protective	NA
BIOCARTA_RANKL_PATHWAY	REACTOME_COPI_MEDIATED_ANTEROGRADE_TRANSPORT	rs34256674	18	62361984	TNFRSF11A	rs2023685	7	107527890	COG5	dominant	0.199097	0.223671	2.108	0.862823	protective	NA
BIOCARTA_RANKL_PATHWAY	REACTOME_COPI_MEDIATED_ANTEROGRADE_TRANSPORT	rs2866413	4	102635920	NFKB1	rs1201689	15	41813720	SPTBN5	dominant	0.44659	0.475426	2.09907	0.8904	protective	NA
BIOCARTA_RANKL_PATHWAY	REACTOME_COPI_MEDIATED_ANTEROGRADE_TRANSPORT	rs1051393	21	33241950	IFNAR2	rs13119659	4	75799732	USO1	dominant	0.294634	0.321464	2.08827	0.881674	protective	NA
BIOCARTA_RANKL_PATHWAY	REACTOME_COPI_MEDIATED_ANTEROGRADE_TRANSPORT	rs1051393	21	33241950	IFNAR2	rs3808869	9	34622392	DCTN3	dominant	0.403962	0.432046	2.08049	0.890942	protective	NA
BIOCARTA_RANKL_PATHWAY	REACTOME_COPI_MEDIATED_ANTEROGRADE_TRANSPORT	rs12801636	11	65623846	RELA	rs2293079	2	219236065	TUBA4A/TUBA4B	dominant	0.0947844	0.114594	2.05124	0.809033	protective	NA
BIOCARTA_RANKL_PATHWAY	REACTOME_COPI_MEDIATED_ANTEROGRADE_TRANSPORT	rs1051393	21	33241950	IFNAR2	rs3828102	1	19305838	CAPZB	dominant	0.371113	0.398696	2.04348	0.889992	protective	NA
BIOCARTA_RANKL_PATHWAY	REACTOME_COPI_MEDIATED_ANTEROGRADE_TRANSPORT	rs12607917	18	62428753	TNFRSF11A	rs7006290	8	41757620	ANK1	dominant	0.276078	0.303159	2.0335	0.876603	protective	NA
BIOCARTA_RANKL_PATHWAY	REACTOME_COPI_MEDIATED_ANTEROGRADE_TRANSPORT	rs1051393	21	33241950	IFNAR2	rs6356	11	2169721	INS	dominant	0.318205	0.34679	2.02144	0.879099	protective	NA
BIOCARTA_RANKL_PATHWAY	REACTOME_COPI_MEDIATED_ANTEROGRADE_TRANSPORT	rs2295322	14	24210671	IRF9	rs41273499	1	158562824	SPTA1	dominant	0.0977934	0.115095	1.98678	0.833379	protective	NA
BIOCARTA_RANKL_PATHWAY	REACTOME_COPI_MEDIATED_ANTEROGRADE_TRANSPORT	rs1051393	21	33241950	IFNAR2	rs872808	20	63247598	ARFGAP1	dominant	0.322718	0.349298	1.98328	0.887647	protective	NA
BIOCARTA_RANKL_PATHWAY	REACTOME_COPI_MEDIATED_ANTEROGRADE_TRANSPORT	rs7589485	2	28422253	FOSL2	rs11191274	10	102380593	GBF1	dominant	0.14995	0.17001	1.97479	0.861192	protective	NA
BIOCARTA_RANKL_PATHWAY	REACTOME_COPI_MEDIATED_ANTEROGRADE_TRANSPORT	rs34256674	18	62361984	TNFRSF11A	rs7694725	4	113079800	ANK2	dominant	0.239218	0.264293	1.97318	0.875291	protective	NA
BIOCARTA_RANKL_PATHWAY	REACTOME_COPI_MEDIATED_ANTEROGRADE_TRANSPORT	rs2866413	4	102635920	NFKB1	rs11603023	11	118615352	ARCN1	dominant	0.484955	0.513541	1.96395	0.891924	protective	NA
BIOCARTA_RANKL_PATHWAY	REACTOME_COPI_MEDIATED_ANTEROGRADE_TRANSPORT	rs1051393	21	33241950	IFNAR2	rs699	1	230710048	COG2	dominant	0.359829	0.38666	1.95344	0.891606	protective	NA
BIOCARTA_RANKL_PATHWAY	REACTOME_COPI_MEDIATED_ANTEROGRADE_TRANSPORT	rs1051393	21	33241950	IFNAR2	rs831606	11	33695594	CD59	dominant	0.247743	0.272568	1.94024	0.878929	protective	NA
BIOCARTA_RANKL_PATHWAY	REACTOME_COPI_MEDIATED_ANTEROGRADE_TRANSPORT	rs12607917	18	62428753	TNFRSF11A	rs11603023	11	118615352	ARCN1	dominant	0.342026	0.369358	1.9124	0.887536	protective	NA
BIOCARTA_RANKL_PATHWAY	REACTOME_COPI_MEDIATED_ANTEROGRADE_TRANSPORT	rs12895416	14	75291419	FOS	rs3757840	7	44191617	YKT6	dominant	0.411484	0.437813	1.90606	0.897815	protective	NA
BIOCARTA_RANKL_PATHWAY	REACTOME_COPI_MEDIATED_ANTEROGRADE_TRANSPORT	rs2866413	4	102635920	NFKB1	rs28568406	1	158717373	SPTA1	dominant	0.451103	0.47994	1.89793	0.890538	protective	NA
BIOCARTA_RANKL_PATHWAY	REACTOME_COPI_MEDIATED_ANTEROGRADE_TRANSPORT	rs1051393	21	33241950	IFNAR2	rs1004446	11	2148913	INS	dominant	0.320963	0.34679	1.87929	0.890321	protective	NA
BIOCARTA_RANKL_PATHWAY	REACTOME_COPI_MEDIATED_ANTEROGRADE_TRANSPORT	rs1805034	18	62360008	TNFRSF11A	rs41273499	1	158562824	SPTA1	dominant	0.102056	0.119609	1.87752	0.83657	protective	NA
BIOCARTA_RANKL_PATHWAY	REACTOME_COPI_MEDIATED_ANTEROGRADE_TRANSPORT	rs12895416	14	75291419	FOS	rs62107586	19	6468320	TUBB4A	dominant	0.369609	0.395186	1.86741	0.897332	protective	NA
BIOCARTA_RANKL_PATHWAY	REACTOME_COPI_MEDIATED_ANTEROGRADE_TRANSPORT	rs12895416	14	75291419	FOS	rs11191274	10	102380593	GBF1	dominant	0.124875	0.14343	1.84212	0.852169	protective	NA
BIOCARTA_RANKL_PATHWAY	REACTOME_COPI_MEDIATED_ANTEROGRADE_TRANSPORT	rs12607917	18	62428753	TNFRSF11A	rs11191274	10	102380593	GBF1	dominant	0.115848	0.133651	1.83799	0.849338	protective	NA
BIOCARTA_RANKL_PATHWAY	REACTOME_COPI_MEDIATED_ANTEROGRADE_TRANSPORT	rs7589485	2	28422253	FOSL2	rs1586861	3	139339654	COPB2	dominant	0.12663	0.144433	1.82232	0.858864	protective	NA
BIOCARTA_RANKL_PATHWAY	REACTOME_COPI_MEDIATED_ANTEROGRADE_TRANSPORT	rs1051393	21	33241950	IFNAR2	rs12357206	10	60030625	ANK3	dominant	0.399699	0.425777	1.80525	0.89797	protective	NA
BIOCARTA_RANKL_PATHWAY	REACTOME_COPI_MEDIATED_ANTEROGRADE_TRANSPORT	rs3825584	14	24118430	IRF9	rs2723088	2	65072164	RAB1A	dominant	0.110582	0.12989	1.78609	0.83287	protective	NA
BIOCARTA_RANKL_PATHWAY	REACTOME_COPI_MEDIATED_ANTEROGRADE_TRANSPORT	rs2295322	14	24210671	IRF9	rs28568406	1	158717373	SPTA1	dominant	0.443581	0.471665	1.78207	0.892989	protective	NA
BIOCARTA_RANKL_PATHWAY	REACTOME_COPI_MEDIATED_ANTEROGRADE_TRANSPORT	rs35211496	18	62354528	TNFRSF11A	rs61729639	17	73236851	COG1	dominant	0.0295888	0.0393681	1.78081	0.744018	protective	NA
BIOCARTA_RANKL_PATHWAY	REACTOME_COPI_MEDIATED_ANTEROGRADE_TRANSPORT	rs1051393	21	33241950	IFNAR2	rs3757840	7	44191617	YKT6	dominant	0.396439	0.422267	1.77289	0.898662	protective	NA
BIOCARTA_RANKL_PATHWAY	REACTOME_COPI_MEDIATED_ANTEROGRADE_TRANSPORT	rs2866413	4	102635920	NFKB1	rs11191274	10	102380593	GBF1	dominant	0.160732	0.179789	1.75847	0.873703	protective	NA
BIOCARTA_RANKL_PATHWAY	REACTOME_COPI_MEDIATED_ANTEROGRADE_TRANSPORT	rs34256674	18	62361984	TNFRSF11A	rs13119659	4	75799732	USO1	dominant	0.38992	0.415496	1.73151	0.8991	protective	NA
BIOCARTA_RANKL_PATHWAY	REACTOME_COPI_MEDIATED_ANTEROGRADE_TRANSPORT	rs12895416	14	75291419	FOS	rs2074404	17	46788073	NSF	dominant	0.238716	0.261535	1.72002	0.885393	protective	NA
BIOCARTA_RANKL_PATHWAY	REACTOME_COPI_MEDIATED_ANTEROGRADE_TRANSPORT	rs2866413	4	102635920	NFKB1	rs2274285	13	45529800	COG3	dominant	0.303661	0.326479	1.70621	0.899629	protective	NA
BIOCARTA_RANKL_PATHWAY	REACTOME_COPI_MEDIATED_ANTEROGRADE_TRANSPORT	rs7589485	2	28422253	FOSL2	rs3816533	15	41841899	SPTBN5	dominant	0.171264	0.190572	1.70512	0.877747	protective	NA
BIOCARTA_RANKL_PATHWAY	REACTOME_COPI_MEDIATED_ANTEROGRADE_TRANSPORT	rs7589485	2	28422253	FOSL2	rs2723088	2	65072164	RAB1A	dominant	0.157472	0.178536	1.69747	0.859972	protective	NA
BIOCARTA_RANKL_PATHWAY	REACTOME_COPI_MEDIATED_ANTEROGRADE_TRANSPORT	rs34256674	18	62361984	TNFRSF11A	rs28568406	1	158717373	SPTA1	dominant	0.444584	0.471916	1.65931	0.895723	protective	NA
BIOCARTA_RANKL_PATHWAY	REACTOME_COPI_MEDIATED_ANTEROGRADE_TRANSPORT	rs1051393	21	33241950	IFNAR2	rs4760600	12	48921211	ARF3	dominant	0.347793	0.372367	1.65422	0.898815	protective	NA
BIOCARTA_RANKL_PATHWAY	REACTOME_COPI_MEDIATED_ANTEROGRADE_TRANSPORT	rs12607917	18	62428753	TNFRSF11A	rs2723088	2	65072164	RAB1A	dominant	0.1166	0.135657	1.65105	0.840977	protective	NA
BIOCARTA_RANKL_PATHWAY	REACTOME_COPI_MEDIATED_ANTEROGRADE_TRANSPORT	rs2295322	14	24210671	IRF9	rs3757840	7	44191617	YKT6	dominant	0.517553	0.543631	1.64951	0.900568	protective	NA
BIOCARTA_RANKL_PATHWAY	REACTOME_COPI_MEDIATED_ANTEROGRADE_TRANSPORT	rs34256674	18	62361984	TNFRSF11A	rs2074404	17	46788073	NSF	dominant	0.293631	0.316951	1.64297	0.895839	protective	NA
BIOCARTA_RANKL_PATHWAY	REACTOME_COPI_MEDIATED_ANTEROGRADE_TRANSPORT	rs12895416	14	75291419	FOS	rs11603023	11	118615352	ARCN1	dominant	0.369609	0.395436	1.64226	0.896391	protective	NA
BIOCARTA_RANKL_PATHWAY	REACTOME_COPI_MEDIATED_ANTEROGRADE_TRANSPORT	rs35211496	18	62354528	TNFRSF11A	rs3757840	7	44191617	YKT6	dominant	0.242477	0.264293	1.63598	0.891036	protective	NA
BIOCARTA_RANKL_PATHWAY	REACTOME_COPI_MEDIATED_ANTEROGRADE_TRANSPORT	rs7589485	2	28422253	FOSL2	rs1201689	15	41813720	SPTBN5	dominant	0.415246	0.440572	1.61662	0.901695	protective	NA
BIOCARTA_RANKL_PATHWAY	REACTOME_COPI_MEDIATED_ANTEROGRADE_TRANSPORT	rs2866413	4	102635920	NFKB1	rs13119659	4	75799732	USO1	dominant	0.39995	0.424524	1.60557	0.903532	protective	NA
BIOCARTA_RANKL_PATHWAY	REACTOME_COPI_MEDIATED_ANTEROGRADE_TRANSPORT	rs3825584	14	24118430	IRF9	rs1805007	16	89919709	TUBB3	dominant	0.0551655	0.0672016	1.60388	0.810438	protective	NA
BIOCARTA_RANKL_PATHWAY	REACTOME_COPI_MEDIATED_ANTEROGRADE_TRANSPORT	rs12895416	14	75291419	FOS	rs3808869	9	34622392	DCTN3	dominant	0.427031	0.4501	1.59952	0.910548	protective	NA
BIOCARTA_RANKL_PATHWAY	REACTOME_COPI_MEDIATED_ANTEROGRADE_TRANSPORT	rs12607917	18	62428753	TNFRSF11A	rs1274971	3	39119973	GORASP1	dominant	0.282096	0.303661	1.58011	0.901079	protective	NA
BIOCARTA_RANKL_PATHWAY	REACTOME_COPI_MEDIATED_ANTEROGRADE_TRANSPORT	rs2866413	4	102635920	NFKB1	rs2023685	7	107527890	COG5	dominant	0.203109	0.225176	1.57731	0.877028	protective	NA
BIOCARTA_RANKL_PATHWAY	REACTOME_COPI_MEDIATED_ANTEROGRADE_TRANSPORT	rs12607917	18	62428753	TNFRSF11A	rs2023685	7	107527890	COG5	dominant	0.139418	0.159228	1.57461	0.855436	protective	NA
BIOCARTA_RANKL_PATHWAY	REACTOME_COPI_MEDIATED_ANTEROGRADE_TRANSPORT	rs35211496	18	62354528	TNFRSF11A	rs72878024	11	199492	BET1L	dominant	0.0446339	0.055667	1.57206	0.792542	protective	NA
BIOCARTA_RANKL_PATHWAY	REACTOME_COPI_MEDIATED_ANTEROGRADE_TRANSPORT	rs12895416	14	75291419	FOS	rs13119659	4	75799732	USO1	dominant	0.303661	0.326981	1.56575	0.89758	protective	NA
BIOCARTA_RANKL_PATHWAY	REACTOME_COPI_MEDIATED_ANTEROGRADE_TRANSPORT	rs1051393	21	33241950	IFNAR2	rs9311651	3	57542776	ARF4	dominant	0.138917	0.157974	1.56444	0.859903	protective	NA
BIOCARTA_RANKL_PATHWAY	REACTOME_COPI_MEDIATED_ANTEROGRADE_TRANSPORT	rs12607917	18	62428753	TNFRSF11A	rs28568406	1	158717373	SPTA1	dominant	0.31319	0.338516	1.55548	0.891069	protective	NA
BIOCARTA_RANKL_PATHWAY	REACTOME_COPI_MEDIATED_ANTEROGRADE_TRANSPORT	rs35211496	18	62354528	TNFRSF11A	rs2274285	13	45529800	COG3	dominant	0.141424	0.159228	1.5487	0.869772	protective	NA
BIOCARTA_RANKL_PATHWAY	REACTOME_COPI_MEDIATED_ANTEROGRADE_TRANSPORT	rs12895416	14	75291419	FOS	rs1201689	15	41813720	SPTBN5	dominant	0.351555	0.375878	1.54748	0.900208	protective	NA
BIOCARTA_RANKL_PATHWAY	REACTOME_COPI_MEDIATED_ANTEROGRADE_TRANSPORT	rs12895416	14	75291419	FOS	rs138457	22	38502046	KDELR3	dominant	0.342778	0.364845	1.53973	0.907975	protective	NA
BIOCARTA_RANKL_PATHWAY	REACTOME_COPI_MEDIATED_ANTEROGRADE_TRANSPORT	rs1805034	18	62360008	TNFRSF11A	rs872808	20	63247598	ARFGAP1	dominant	0.42001	0.448596	1.52021	0.890131	protective	NA
BIOCARTA_RANKL_PATHWAY	REACTOME_COPI_MEDIATED_ANTEROGRADE_TRANSPORT	rs2866413	4	102635920	NFKB1	rs16915157	10	60586880	ANK3	dominant	0.251003	0.270812	1.50489	0.902339	protective	NA
BIOCARTA_RANKL_PATHWAY	REACTOME_COPI_MEDIATED_ANTEROGRADE_TRANSPORT	rs1051393	21	33241950	IFNAR2	rs62587579	9	137216103	TUBB4B	dominant	0.0463892	0.0594283	1.49779	0.769917	protective	NA
BIOCARTA_RANKL_PATHWAY	REACTOME_COPI_MEDIATED_ANTEROGRADE_TRANSPORT	rs35211496	18	62354528	TNFRSF11A	rs11603023	11	118615352	ARCN1	dominant	0.221916	0.244233	1.48484	0.882563	protective	NA
BIOCARTA_RANKL_PATHWAY	REACTOME_COPI_MEDIATED_ANTEROGRADE_TRANSPORT	rs12895416	14	75291419	FOS	rs1026128	17	73200670	COG1	dominant	0.409729	0.433049	1.47872	0.90877	protective	NA
BIOCARTA_RANKL_PATHWAY	REACTOME_COPI_MEDIATED_ANTEROGRADE_TRANSPORT	rs12895416	14	75291419	FOS	rs375481719	11	66312315	RAB1B	dominant	0.430291	0.452859	1.47608	0.912527	protective	NA
BIOCARTA_RANKL_PATHWAY	REACTOME_COPI_MEDIATED_ANTEROGRADE_TRANSPORT	rs1805034	18	62360008	TNFRSF11A	rs13119659	4	75799732	USO1	dominant	0.390171	0.413741	1.47275	0.906581	protective	NA
BIOCARTA_RANKL_PATHWAY	REACTOME_COPI_MEDIATED_ANTEROGRADE_TRANSPORT	rs7589485	2	28422253	FOSL2	rs872808	20	63247598	ARFGAP1	dominant	0.404213	0.42678	1.46992	0.911245	protective	NA
BIOCARTA_RANKL_PATHWAY	REACTOME_COPI_MEDIATED_ANTEROGRADE_TRANSPORT	rs2866413	4	102635920	NFKB1	rs2074404	17	46788073	NSF	dominant	0.305667	0.327984	1.46636	0.902003	protective	NA
BIOCARTA_RANKL_PATHWAY	REACTOME_COPI_MEDIATED_ANTEROGRADE_TRANSPORT	rs2834167	21	33268483	IFNAR2	rs3016311	11	66324343	RAB1B	dominant	0.0812437	0.0945336	1.46628	0.846985	protective	NA
BIOCARTA_RANKL_PATHWAY	REACTOME_COPI_MEDIATED_ANTEROGRADE_TRANSPORT	rs35211496	18	62354528	TNFRSF11A	rs1201689	15	41813720	SPTBN5	dominant	0.20336	0.224423	1.46394	0.882187	protective	NA
BIOCARTA_RANKL_PATHWAY	REACTOME_COPI_MEDIATED_ANTEROGRADE_TRANSPORT	rs2957128	18	62393502	TNFRSF11A	rs2074404	17	46788073	NSF	dominant	0.263039	0.285858	1.44967	0.891684	protective	NA
BIOCARTA_RANKL_PATHWAY	REACTOME_COPI_MEDIATED_ANTEROGRADE_TRANSPORT	rs2866413	4	102635920	NFKB1	rs7694725	4	113079800	ANK2	dominant	0.242477	0.264794	1.44734	0.888742	protective	NA
BIOCARTA_RANKL_PATHWAY	REACTOME_COPI_MEDIATED_ANTEROGRADE_TRANSPORT	rs2866413	4	102635920	NFKB1	rs699	1	230710048	COG2	dominant	0.48997	0.513039	1.44481	0.911837	protective	NA
BIOCARTA_RANKL_PATHWAY	REACTOME_COPI_MEDIATED_ANTEROGRADE_TRANSPORT	rs1805034	18	62360008	TNFRSF11A	rs2286845	7	93994146	BET1	dominant	0.421264	0.445587	1.44174	0.90568	protective	NA
BIOCARTA_RANKL_PATHWAY	REACTOME_COPI_MEDIATED_ANTEROGRADE_TRANSPORT	rs12895416	14	75291419	FOS	rs3828102	1	19305838	CAPZB	dominant	0.394433	0.415998	1.43834	0.914397	protective	NA
BIOCARTA_RANKL_PATHWAY	REACTOME_COPI_MEDIATED_ANTEROGRADE_TRANSPORT	rs1021188	13	42541997	TNFSF11	rs7694725	4	113079800	ANK2	dominant	0.0970411	0.114092	1.43443	0.834488	protective	NA
BIOCARTA_RANKL_PATHWAY	REACTOME_COPI_MEDIATED_ANTEROGRADE_TRANSPORT	rs35211496	18	62354528	TNFRSF11A	rs1274971	3	39119973	GORASP1	dominant	0.186309	0.204614	1.42927	0.890056	protective	NA
BIOCARTA_RANKL_PATHWAY	REACTOME_COPI_MEDIATED_ANTEROGRADE_TRANSPORT	rs3825584	14	24118430	IRF9	rs1274971	3	39119973	GORASP1	dominant	0.265296	0.285607	1.41512	0.903206	protective	NA
BIOCARTA_RANKL_PATHWAY	REACTOME_COPI_MEDIATED_ANTEROGRADE_TRANSPORT	rs7589485	2	28422253	FOSL2	rs13119659	4	75799732	USO1	dominant	0.378887	0.401956	1.41342	0.907598	protective	NA
BIOCARTA_RANKL_PATHWAY	REACTOME_COPI_MEDIATED_ANTEROGRADE_TRANSPORT	rs2866413	4	102635920	NFKB1	rs2478516	1	230732906	COG2	dominant	0.198847	0.21665	1.41248	0.897428	protective	NA
BIOCARTA_RANKL_PATHWAY	REACTOME_COPI_MEDIATED_ANTEROGRADE_TRANSPORT	rs11550452	14	24184317	IRF9	rs3742424	14	101925240	DYNC1H1	dominant	0.0769809	0.0900201	1.40977	0.843073	protective	NA
BIOCARTA_RANKL_PATHWAY	REACTOME_COPI_MEDIATED_ANTEROGRADE_TRANSPORT	rs12895416	14	75291419	FOS	rs872808	20	63247598	ARFGAP1	dominant	0.335507	0.357071	1.40842	0.909114	protective	NA
BIOCARTA_RANKL_PATHWAY	REACTOME_COPI_MEDIATED_ANTEROGRADE_TRANSPORT	rs12895416	14	75291419	FOS	rs28568406	1	158717373	SPTA1	dominant	0.352808	0.377633	1.38965	0.898427	protective	NA
BIOCARTA_RANKL_PATHWAY	REACTOME_COPI_MEDIATED_ANTEROGRADE_TRANSPORT	rs12801636	11	65623846	RELA	rs138457	22	38502046	KDELR3	dominant	0.236961	0.256269	1.35891	0.90126	protective	NA
BIOCARTA_RANKL_PATHWAY	REACTOME_COPI_MEDIATED_ANTEROGRADE_TRANSPORT	rs12801636	11	65623846	RELA	rs3816533	15	41841899	SPTBN5	dominant	0.102056	0.116851	1.35736	0.859001	protective	NA
BIOCARTA_RANKL_PATHWAY	REACTOME_COPI_MEDIATED_ANTEROGRADE_TRANSPORT	rs12607917	18	62428753	TNFRSF11A	rs375481719	11	66312315	RAB1B	dominant	0.38666	0.407723	1.35377	0.915772	protective	NA
BIOCARTA_RANKL_PATHWAY	REACTOME_COPI_MEDIATED_ANTEROGRADE_TRANSPORT	rs2295322	14	24210671	IRF9	rs831606	11	33695594	CD59	dominant	0.325978	0.34679	1.34925	0.910961	protective	NA
BIOCARTA_RANKL_PATHWAY	REACTOME_COPI_MEDIATED_ANTEROGRADE_TRANSPORT	rs2866413	4	102635920	NFKB1	rs2276635	2	219222719	TUBA4A/TUBA4B	dominant	0.128385	0.14343	1.34788	0.879654	protective	NA
BIOCARTA_RANKL_PATHWAY	REACTOME_COPI_MEDIATED_ANTEROGRADE_TRANSPORT	rs3825584	14	24118430	IRF9	rs28568406	1	158717373	SPTA1	dominant	0.286108	0.309679	1.34417	0.893382	protective	NA
BIOCARTA_RANKL_PATHWAY	REACTOME_COPI_MEDIATED_ANTEROGRADE_TRANSPORT	rs11550452	14	24184317	IRF9	rs11603023	11	118615352	ARCN1	dominant	0.347793	0.371364	1.34415	0.902683	protective	NA
BIOCARTA_RANKL_PATHWAY	REACTOME_COPI_MEDIATED_ANTEROGRADE_TRANSPORT	rs12895416	14	75291419	FOS	rs12357206	10	60030625	ANK3	dominant	0.422016	0.442828	1.34261	0.918685	protective	NA
BIOCARTA_RANKL_PATHWAY	REACTOME_COPI_MEDIATED_ANTEROGRADE_TRANSPORT	rs11550452	14	24184317	IRF9	rs6356	11	2169721	INS	dominant	0.307924	0.332247	1.34234	0.89422	protective	NA
BIOCARTA_RANKL_PATHWAY	REACTOME_COPI_MEDIATED_ANTEROGRADE_TRANSPORT	rs12895416	14	75291419	FOS	rs29302	4	113303436	ANK2	dominant	0.385155	0.406469	1.33721	0.914715	protective	NA
BIOCARTA_RANKL_PATHWAY	REACTOME_COPI_MEDIATED_ANTEROGRADE_TRANSPORT	rs12607917	18	62428753	TNFRSF11A	rs3808869	9	34622392	DCTN3	dominant	0.377382	0.397693	1.33463	0.917972	protective	NA
BIOCARTA_RANKL_PATHWAY	REACTOME_COPI_MEDIATED_ANTEROGRADE_TRANSPORT	rs2834167	21	33268483	IFNAR2	rs3742424	14	101925240	DYNC1H1	dominant	0.0697091	0.081996	1.33002	0.838924	protective	NA
BIOCARTA_RANKL_PATHWAY	REACTOME_COPI_MEDIATED_ANTEROGRADE_TRANSPORT	rs1051393	21	33241950	IFNAR2	rs2228479	16	89919532	TUBB3	dominant	0.081996	0.0970411	1.3218	0.831113	protective	NA
BIOCARTA_RANKL_PATHWAY	REACTOME_COPI_MEDIATED_ANTEROGRADE_TRANSPORT	rs1805034	18	62360008	TNFRSF11A	rs3016311	11	66324343	RAB1B	dominant	0.117101	0.133902	1.32126	0.857891	protective	NA
BIOCARTA_RANKL_PATHWAY	REACTOME_COPI_MEDIATED_ANTEROGRADE_TRANSPORT	rs12801636	11	65623846	RELA	rs1406961	20	63264568	ARFGAP1	dominant	0.0724674	0.085005	1.31467	0.840984	protective	NA
BIOCARTA_RANKL_PATHWAY	REACTOME_COPI_MEDIATED_ANTEROGRADE_TRANSPORT	rs35211496	18	62354528	TNFRSF11A	rs2286845	7	93994146	BET1	dominant	0.194333	0.214393	1.31391	0.883864	protective	NA
BIOCARTA_RANKL_PATHWAY	REACTOME_COPI_MEDIATED_ANTEROGRADE_TRANSPORT	rs2295322	14	24210671	IRF9	rs1274971	3	39119973	GORASP1	dominant	0.397944	0.418756	1.28555	0.917449	protective	NA
BIOCARTA_RANKL_PATHWAY	REACTOME_COPI_MEDIATED_ANTEROGRADE_TRANSPORT	rs34256674	18	62361984	TNFRSF11A	rs831606	11	33695594	CD59	dominant	0.324975	0.345286	1.28297	0.912857	protective	NA
BIOCARTA_RANKL_PATHWAY	REACTOME_COPI_MEDIATED_ANTEROGRADE_TRANSPORT	rs2866413	4	102635920	NFKB1	rs2286845	7	93994146	BET1	dominant	0.432548	0.455868	1.28228	0.909851	protective	NA
BIOCARTA_RANKL_PATHWAY	REACTOME_COPI_MEDIATED_ANTEROGRADE_TRANSPORT	rs3825584	14	24118430	IRF9	rs16915157	10	60586880	ANK3	dominant	0.157723	0.173521	1.277	0.891911	protective	NA
BIOCARTA_RANKL_PATHWAY	REACTOME_COPI_MEDIATED_ANTEROGRADE_TRANSPORT	rs2295322	14	24210671	IRF9	rs62107586	19	6468320	TUBB4A	dominant	0.469157	0.490221	1.26742	0.919059	protective	NA
BIOCARTA_RANKL_PATHWAY	REACTOME_COPI_MEDIATED_ANTEROGRADE_TRANSPORT	rs35211496	18	62354528	TNFRSF11A	rs2023685	7	107527890	COG5	dominant	0.0902708	0.106319	1.2673	0.834079	protective	NA
BIOCARTA_RANKL_PATHWAY	REACTOME_COPI_MEDIATED_ANTEROGRADE_TRANSPORT	rs3825584	14	24118430	IRF9	rs1201689	15	41813720	SPTBN5	dominant	0.29012	0.311685	1.26577	0.902536	protective	NA
BIOCARTA_RANKL_PATHWAY	REACTOME_COPI_MEDIATED_ANTEROGRADE_TRANSPORT	rs12895416	14	75291419	FOS	rs16915157	10	60586880	ANK3	dominant	0.195336	0.212638	1.25396	0.89888	protective	NA
BIOCARTA_RANKL_PATHWAY	REACTOME_COPI_MEDIATED_ANTEROGRADE_TRANSPORT	rs12607917	18	62428753	TNFRSF11A	rs229587	14	64796582	SPTB	dominant	0.295386	0.315697	1.24457	0.908692	protective	NA
BIOCARTA_RANKL_PATHWAY	REACTOME_COPI_MEDIATED_ANTEROGRADE_TRANSPORT	rs12895416	14	75291419	FOS	rs8089027	18	10597877	NAPG	dominant	0.395436	0.415246	1.23622	0.921091	protective	NA
BIOCARTA_RANKL_PATHWAY	REACTOME_COPI_MEDIATED_ANTEROGRADE_TRANSPORT	rs1051393	21	33241950	IFNAR2	rs4762	1	230710231	COG2	dominant	0.120612	0.137161	1.23511	0.862793	protective	NA
BIOCARTA_RANKL_PATHWAY	REACTOME_COPI_MEDIATED_ANTEROGRADE_TRANSPORT	rs2834167	21	33268483	IFNAR2	rs41273499	1	158562824	SPTA1	dominant	0.0672016	0.0797392	1.2329	0.83144	protective	NA
BIOCARTA_RANKL_PATHWAY	REACTOME_COPI_MEDIATED_ANTEROGRADE_TRANSPORT	rs1021188	13	42541997	TNFSF11	rs3742424	14	101925240	DYNC1H1	dominant	0.0486459	0.0591775	1.23253	0.812934	protective	NA
BIOCARTA_RANKL_PATHWAY	REACTOME_COPI_MEDIATED_ANTEROGRADE_TRANSPORT	rs1805034	18	62360008	TNFRSF11A	rs2276635	2	219222719	TUBA4A/TUBA4B	dominant	0.122367	0.138164	1.23198	0.869721	protective	NA
BIOCARTA_RANKL_PATHWAY	REACTOME_COPI_MEDIATED_ANTEROGRADE_TRANSPORT	rs7589485	2	28422253	FOSL2	rs9311651	3	57542776	ARF4	dominant	0.174022	0.189318	1.22852	0.902183	protective	NA
BIOCARTA_RANKL_PATHWAY	REACTOME_COPI_MEDIATED_ANTEROGRADE_TRANSPORT	rs2957128	18	62393502	TNFRSF11A	rs3816533	15	41841899	SPTBN5	dominant	0.169509	0.187813	1.22377	0.882644	protective	NA
BIOCARTA_RANKL_PATHWAY	REACTOME_COPI_MEDIATED_ANTEROGRADE_TRANSPORT	rs2834167	21	33268483	IFNAR2	rs62107586	19	6468320	TUBB4A	dominant	0.295135	0.314694	1.22212	0.911825	protective	NA
BIOCARTA_RANKL_PATHWAY	REACTOME_COPI_MEDIATED_ANTEROGRADE_TRANSPORT	rs2866413	4	102635920	NFKB1	rs3828102	1	19305838	CAPZB	dominant	0.508024	0.527583	1.21408	0.924646	protective	NA
BIOCARTA_RANKL_PATHWAY	REACTOME_COPI_MEDIATED_ANTEROGRADE_TRANSPORT	rs12607917	18	62428753	TNFRSF11A	rs3828102	1	19305838	CAPZB	dominant	0.355316	0.374122	1.20733	0.922027	protective	NA
BIOCARTA_RANKL_PATHWAY	REACTOME_COPI_MEDIATED_ANTEROGRADE_TRANSPORT	rs12801636	11	65623846	RELA	rs11246020	11	233067	BET1L	dominant	0.155717	0.171013	1.19875	0.894061	protective	NA
BIOCARTA_RANKL_PATHWAY	REACTOME_COPI_MEDIATED_ANTEROGRADE_TRANSPORT	rs2295322	14	24210671	IRF9	rs7694725	4	113079800	ANK2	dominant	0.234203	0.255015	1.19715	0.893428	protective	NA
BIOCARTA_RANKL_PATHWAY	REACTOME_COPI_MEDIATED_ANTEROGRADE_TRANSPORT	rs2866413	4	102635920	NFKB1	rs375481719	11	66312315	RAB1B	dominant	0.553159	0.572718	1.18438	0.923573	protective	NA
BIOCARTA_RANKL_PATHWAY	REACTOME_COPI_MEDIATED_ANTEROGRADE_TRANSPORT	rs2295322	14	24210671	IRF9	rs3742424	14	101925240	DYNC1H1	dominant	0.108826	0.122116	1.18305	0.877881	protective	NA
BIOCARTA_RANKL_PATHWAY	REACTOME_COPI_MEDIATED_ANTEROGRADE_TRANSPORT	rs1805034	18	62360008	TNFRSF11A	rs831606	11	33695594	CD59	dominant	0.324223	0.343781	1.182	0.915811	protective	NA
BIOCARTA_RANKL_PATHWAY	REACTOME_COPI_MEDIATED_ANTEROGRADE_TRANSPORT	rs2866413	4	102635920	NFKB1	rs1026128	17	73200670	COG1	dominant	0.534353	0.558927	1.17874	0.905581	protective	NA
BIOCARTA_RANKL_PATHWAY	REACTOME_COPI_MEDIATED_ANTEROGRADE_TRANSPORT	rs35211496	18	62354528	TNFRSF11A	rs138457	22	38502046	KDELR3	dominant	0.201103	0.218154	1.17609	0.902164	protective	NA
BIOCARTA_RANKL_PATHWAY	REACTOME_COPI_MEDIATED_ANTEROGRADE_TRANSPORT	rs2866413	4	102635920	NFKB1	rs7006290	8	41757620	ANK1	dominant	0.406219	0.424774	1.17305	0.926432	protective	NA
BIOCARTA_RANKL_PATHWAY	REACTOME_COPI_MEDIATED_ANTEROGRADE_TRANSPORT	rs12607917	18	62428753	TNFRSF11A	rs72878024	11	199492	BET1L	dominant	0.0714644	0.0832497	1.16536	0.847538	protective	NA
BIOCARTA_RANKL_PATHWAY	REACTOME_COPI_MEDIATED_ANTEROGRADE_TRANSPORT	rs7589485	2	28422253	FOSL2	rs3757840	7	44191617	YKT6	dominant	0.499248	0.519559	1.1629	0.921932	protective	NA
BIOCARTA_RANKL_PATHWAY	REACTOME_COPI_MEDIATED_ANTEROGRADE_TRANSPORT	rs7589485	2	28422253	FOSL2	rs1274971	3	39119973	GORASP1	dominant	0.379137	0.398195	1.16226	0.922915	protective	NA
BIOCARTA_RANKL_PATHWAY	REACTOME_COPI_MEDIATED_ANTEROGRADE_TRANSPORT	rs7589485	2	28422253	FOSL2	rs2023685	7	107527890	COG5	dominant	0.186058	0.205617	1.16194	0.883134	protective	NA
BIOCARTA_RANKL_PATHWAY	REACTOME_COPI_MEDIATED_ANTEROGRADE_TRANSPORT	rs7589485	2	28422253	FOSL2	rs62107586	19	6468320	TUBB4A	dominant	0.446088	0.466148	1.14894	0.922309	protective	NA
BIOCARTA_RANKL_PATHWAY	REACTOME_COPI_MEDIATED_ANTEROGRADE_TRANSPORT	rs7589485	2	28422253	FOSL2	rs41273499	1	158562824	SPTA1	dominant	0.0930291	0.10657	1.14837	0.859909	protective	NA
BIOCARTA_RANKL_PATHWAY	REACTOME_COPI_MEDIATED_ANTEROGRADE_TRANSPORT	rs12801636	11	65623846	RELA	rs11549015	15	41943118	SPTBN5	dominant	0.110832	0.123621	1.14599	0.883657	protective	NA
BIOCARTA_RANKL_PATHWAY	REACTOME_COPI_MEDIATED_ANTEROGRADE_TRANSPORT	rs12895416	14	75291419	FOS	rs41273499	1	158562824	SPTA1	dominant	0.0777332	0.0905216	1.14554	0.846818	protective	NA
BIOCARTA_RANKL_PATHWAY	REACTOME_COPI_MEDIATED_ANTEROGRADE_TRANSPORT	rs34256674	18	62361984	TNFRSF11A	rs62107586	19	6468320	TUBB4A	dominant	0.46991	0.48997	1.14518	0.922765	protective	NA
BIOCARTA_RANKL_PATHWAY	REACTOME_COPI_MEDIATED_ANTEROGRADE_TRANSPORT	rs2866413	4	102635920	NFKB1	rs62107586	19	6468320	TUBB4A	dominant	0.478686	0.498746	1.14484	0.922846	protective	NA
BIOCARTA_RANKL_PATHWAY	REACTOME_COPI_MEDIATED_ANTEROGRADE_TRANSPORT	rs2229207	21	33241945	IFNAR2	rs4762	1	230710231	COG2	dominant	0.0325978	0.0403711	1.14457	0.800965	protective	NA
BIOCARTA_RANKL_PATHWAY	REACTOME_COPI_MEDIATED_ANTEROGRADE_TRANSPORT	rs34256674	18	62361984	TNFRSF11A	rs1586861	3	139339654	COPB2	dominant	0.132648	0.146941	1.13429	0.887855	protective	NA
BIOCARTA_RANKL_PATHWAY	REACTOME_COPI_MEDIATED_ANTEROGRADE_TRANSPORT	rs3825584	14	24118430	IRF9	rs6356	11	2169721	INS	dominant	0.278335	0.300903	1.13353	0.896074	protective	NA
BIOCARTA_RANKL_PATHWAY	REACTOME_COPI_MEDIATED_ANTEROGRADE_TRANSPORT	rs1051393	21	33241950	IFNAR2	rs1380453	10	60274597	ANK3	dominant	0.398195	0.419509	1.13243	0.915576	protective	NA
BIOCARTA_RANKL_PATHWAY	REACTOME_COPI_MEDIATED_ANTEROGRADE_TRANSPORT	rs2834167	21	33268483	IFNAR2	rs2074404	17	46788073	NSF	dominant	0.192828	0.210883	1.13214	0.893935	protective	NA
BIOCARTA_RANKL_PATHWAY	REACTOME_COPI_MEDIATED_ANTEROGRADE_TRANSPORT	rs2834167	21	33268483	IFNAR2	rs3757840	7	44191617	YKT6	dominant	0.332999	0.352307	1.12893	0.917835	protective	NA
BIOCARTA_RANKL_PATHWAY	REACTOME_COPI_MEDIATED_ANTEROGRADE_TRANSPORT	rs2866413	4	102635920	NFKB1	rs11552421	11	118559804	ARCN1	dominant	0.171013	0.185807	1.11817	0.903952	protective	NA
BIOCARTA_RANKL_PATHWAY	REACTOME_COPI_MEDIATED_ANTEROGRADE_TRANSPORT	rs12801636	11	65623846	RELA	rs1004446	11	2148913	INS	dominant	0.230692	0.24674	1.11439	0.915456	protective	NA
BIOCARTA_RANKL_PATHWAY	REACTOME_COPI_MEDIATED_ANTEROGRADE_TRANSPORT	rs3825584	14	24118430	IRF9	rs2074404	17	46788073	NSF	dominant	0.197342	0.215396	1.1139	0.895574	protective	NA
BIOCARTA_RANKL_PATHWAY	REACTOME_COPI_MEDIATED_ANTEROGRADE_TRANSPORT	rs2834167	21	33268483	IFNAR2	rs16915157	10	60586880	ANK3	dominant	0.157723	0.172016	1.11385	0.90135	protective	NA
BIOCARTA_RANKL_PATHWAY	REACTOME_COPI_MEDIATED_ANTEROGRADE_TRANSPORT	rs7589485	2	28422253	FOSL2	rs28568406	1	158717373	SPTA1	dominant	0.42327	0.447091	1.11364	0.907615	protective	NA
BIOCARTA_RANKL_PATHWAY	REACTOME_COPI_MEDIATED_ANTEROGRADE_TRANSPORT	rs11550452	14	24184317	IRF9	rs7694725	4	113079800	ANK2	dominant	0.169509	0.188064	1.11344	0.881195	protective	NA
BIOCARTA_RANKL_PATHWAY	REACTOME_COPI_MEDIATED_ANTEROGRADE_TRANSPORT	rs2866413	4	102635920	NFKB1	rs1805007	16	89919709	TUBB3	dominant	0.0857573	0.0975426	1.11307	0.867844	protective	NA
BIOCARTA_RANKL_PATHWAY	REACTOME_COPI_MEDIATED_ANTEROGRADE_TRANSPORT	rs1051393	21	33241950	IFNAR2	rs138457	22	38502046	KDELR3	dominant	0.333501	0.354062	1.11043	0.912868	protective	NA
BIOCARTA_RANKL_PATHWAY	REACTOME_COPI_MEDIATED_ANTEROGRADE_TRANSPORT	rs35211496	18	62354528	TNFRSF11A	rs7006290	8	41757620	ANK1	dominant	0.181043	0.196088	1.11024	0.906312	protective	NA
BIOCARTA_RANKL_PATHWAY	REACTOME_COPI_MEDIATED_ANTEROGRADE_TRANSPORT	rs12801636	11	65623846	RELA	rs872808	20	63247598	ARFGAP1	dominant	0.237212	0.255015	1.10167	0.908476	protective	NA
BIOCARTA_RANKL_PATHWAY	REACTOME_COPI_MEDIATED_ANTEROGRADE_TRANSPORT	rs12801636	11	65623846	RELA	rs375481719	11	66312315	RAB1B	dominant	0.29012	0.307673	1.10012	0.919635	protective	NA
BIOCARTA_RANKL_PATHWAY	REACTOME_COPI_MEDIATED_ANTEROGRADE_TRANSPORT	rs12607917	18	62428753	TNFRSF11A	rs2074404	17	46788073	NSF	dominant	0.213139	0.231444	1.09517	0.899487	protective	NA
BIOCARTA_RANKL_PATHWAY	REACTOME_COPI_MEDIATED_ANTEROGRADE_TRANSPORT	rs12895416	14	75291419	FOS	rs9311651	3	57542776	ARF4	dominant	0.144433	0.159228	1.09466	0.891401	protective	NA
BIOCARTA_RANKL_PATHWAY	REACTOME_COPI_MEDIATED_ANTEROGRADE_TRANSPORT	rs12895416	14	75291419	FOS	rs1274971	3	39119973	GORASP1	dominant	0.318957	0.337011	1.09409	0.921339	protective	NA
BIOCARTA_RANKL_PATHWAY	REACTOME_COPI_MEDIATED_ANTEROGRADE_TRANSPORT	rs12895416	14	75291419	FOS	rs1380453	10	60274597	ANK3	dominant	0.414995	0.433551	1.08488	0.926839	protective	NA
BIOCARTA_RANKL_PATHWAY	REACTOME_COPI_MEDIATED_ANTEROGRADE_TRANSPORT	rs2834167	21	33268483	IFNAR2	rs872808	20	63247598	ARFGAP1	dominant	0.277583	0.295888	1.08308	0.914365	protective	NA
BIOCARTA_RANKL_PATHWAY	REACTOME_COPI_MEDIATED_ANTEROGRADE_TRANSPORT	rs11550452	14	24184317	IRF9	rs1805007	16	89919709	TUBB3	dominant	0.0629388	0.0727182	1.07362	0.856485	protective	NA
BIOCARTA_RANKL_PATHWAY	REACTOME_COPI_MEDIATED_ANTEROGRADE_TRANSPORT	rs7589485	2	28422253	FOSL2	rs7572857	2	65069664	RAB1A	dominant	0.21339	0.229438	1.06784	0.91108	protective	NA
BIOCARTA_RANKL_PATHWAY	REACTOME_COPI_MEDIATED_ANTEROGRADE_TRANSPORT	rs2957128	18	62393502	TNFRSF11A	rs11603023	11	118615352	ARCN1	dominant	0.424022	0.446339	1.06346	0.913191	protective	NA
BIOCARTA_RANKL_PATHWAY	REACTOME_COPI_MEDIATED_ANTEROGRADE_TRANSPORT	rs3825584	14	24118430	IRF9	rs2023685	7	107527890	COG5	dominant	0.12989	0.146941	1.06066	0.866637	protective	NA
BIOCARTA_RANKL_PATHWAY	REACTOME_COPI_MEDIATED_ANTEROGRADE_TRANSPORT	rs1051393	21	33241950	IFNAR2	rs1026128	17	73200670	COG1	dominant	0.40321	0.424022	1.05421	0.917754	protective	NA
BIOCARTA_RANKL_PATHWAY	REACTOME_COPI_MEDIATED_ANTEROGRADE_TRANSPORT	rs1051393	21	33241950	IFNAR2	rs41273499	1	158562824	SPTA1	dominant	0.0764794	0.0900201	1.05382	0.837126	protective	NA
BIOCARTA_RANKL_PATHWAY	REACTOME_COPI_MEDIATED_ANTEROGRADE_TRANSPORT	rs12895416	14	75291419	FOS	rs1805007	16	89919709	TUBB3	dominant	0.0667001	0.077984	1.04814	0.844965	protective	NA
BIOCARTA_RANKL_PATHWAY	REACTOME_COPI_MEDIATED_ANTEROGRADE_TRANSPORT	rs1021188	13	42541997	TNFSF11	rs831606	11	33695594	CD59	dominant	0.138164	0.15321	1.04777	0.886058	protective	NA
BIOCARTA_RANKL_PATHWAY	REACTOME_COPI_MEDIATED_ANTEROGRADE_TRANSPORT	rs1805034	18	62360008	TNFRSF11A	rs28568406	1	158717373	SPTA1	dominant	0.44007	0.463641	1.04599	0.909206	protective	NA
BIOCARTA_RANKL_PATHWAY	REACTOME_COPI_MEDIATED_ANTEROGRADE_TRANSPORT	rs2957128	18	62393502	TNFRSF11A	rs2286845	7	93994146	BET1	dominant	0.379388	0.400702	1.04596	0.914292	protective	NA
BIOCARTA_RANKL_PATHWAY	REACTOME_COPI_MEDIATED_ANTEROGRADE_TRANSPORT	rs12607917	18	62428753	TNFRSF11A	rs17030613	1	112648185	CAPZA1	dominant	0.189569	0.205115	1.03876	0.906476	protective	NA
BIOCARTA_RANKL_PATHWAY	REACTOME_COPI_MEDIATED_ANTEROGRADE_TRANSPORT	rs1805034	18	62360008	TNFRSF11A	rs712701	7	127611134	ARF5	dominant	0.249498	0.269057	1.03621	0.90314	protective	NA
BIOCARTA_RANKL_PATHWAY	REACTOME_COPI_MEDIATED_ANTEROGRADE_TRANSPORT	rs1805034	18	62360008	TNFRSF11A	rs9311651	3	57542776	ARF4	dominant	0.184052	0.200602	1.03124	0.898891	protective	NA
BIOCARTA_RANKL_PATHWAY	REACTOME_COPI_MEDIATED_ANTEROGRADE_TRANSPORT	rs35211496	18	62354528	TNFRSF11A	rs62107586	19	6468320	TUBB4A	dominant	0.215898	0.232698	1.03117	0.907922	protective	NA
BIOCARTA_RANKL_PATHWAY	REACTOME_COPI_MEDIATED_ANTEROGRADE_TRANSPORT	rs1051393	21	33241950	IFNAR2	rs2274285	13	45529800	COG3	dominant	0.226931	0.245236	1.01692	0.903447	protective	NA
BIOCARTA_RANKL_PATHWAY	REACTOME_COPI_MEDIATED_ANTEROGRADE_TRANSPORT	rs1805034	18	62360008	TNFRSF11A	rs2293079	2	219236065	TUBA4A/TUBA4B	dominant	0.172768	0.192076	1.0165	0.878484	protective	NA
BIOCARTA_RANKL_PATHWAY	REACTOME_COPI_MEDIATED_ANTEROGRADE_TRANSPORT	rs34256674	18	62361984	TNFRSF11A	rs2478516	1	230732906	COG2	dominant	0.200602	0.217151	1.01364	0.904663	protective	NA
BIOCARTA_RANKL_PATHWAY	REACTOME_COPI_MEDIATED_ANTEROGRADE_TRANSPORT	rs2295322	14	24210671	IRF9	rs1004446	11	2148913	INS	dominant	0.421515	0.440572	1.00718	0.925226	protective	NA
BIOCARTA_RANKL_PATHWAY	REACTOME_COPI_MEDIATED_ANTEROGRADE_TRANSPORT	rs2834167	21	33268483	IFNAR2	rs2023685	7	107527890	COG5	dominant	0.124373	0.140923	1.00061	0.865882	protective	NA
BIOCARTA_RANKL_PATHWAY	REACTOME_COPI_MEDIATED_ANTEROGRADE_TRANSPORT	rs2295322	14	24210671	IRF9	rs2286845	7	93994146	BET1	dominant	0.42653	0.447844	0.984819	0.91701	protective	NA
BIOCARTA_RANKL_PATHWAY	REACTOME_COPI_MEDIATED_ANTEROGRADE_TRANSPORT	rs12607917	18	62428753	TNFRSF11A	rs2977852	8	41631133	ANK1	dominant	0.3666	0.384905	0.98269	0.924918	protective	NA
BIOCARTA_RANKL_PATHWAY	REACTOME_COPI_MEDIATED_ANTEROGRADE_TRANSPORT	rs12607917	18	62428753	TNFRSF11A	rs62107586	19	6468320	TUBB4A	dominant	0.339268	0.357322	0.977341	0.92353	protective	NA
BIOCARTA_RANKL_PATHWAY	REACTOME_COPI_MEDIATED_ANTEROGRADE_TRANSPORT	rs12607917	18	62428753	TNFRSF11A	rs7911953	10	60031281	ANK3	dominant	0.0769809	0.088014	0.963186	0.864189	protective	NA
BIOCARTA_RANKL_PATHWAY	REACTOME_COPI_MEDIATED_ANTEROGRADE_TRANSPORT	rs2229207	21	33241945	IFNAR2	rs2023685	7	107527890	COG5	dominant	0.0401204	0.0514042	0.953751	0.771313	protective	NA
BIOCARTA_RANKL_PATHWAY	REACTOME_COPI_MEDIATED_ANTEROGRADE_TRANSPORT	rs11550452	14	24184317	IRF9	rs41273499	1	158562824	SPTA1	dominant	0.0694584	0.080993	0.938144	0.846955	protective	NA
BIOCARTA_RANKL_PATHWAY	REACTOME_COPI_MEDIATED_ANTEROGRADE_TRANSPORT	rs7589485	2	28422253	FOSL2	rs1026128	17	73200670	COG1	dominant	0.492728	0.511535	0.934976	0.927525	protective	NA
BIOCARTA_RANKL_PATHWAY	REACTOME_COPI_MEDIATED_ANTEROGRADE_TRANSPORT	rs2866413	4	102635920	NFKB1	rs831606	11	33695594	CD59	dominant	0.331996	0.349799	0.930084	0.923809	protective	NA
BIOCARTA_RANKL_PATHWAY	REACTOME_COPI_MEDIATED_ANTEROGRADE_TRANSPORT	rs12895416	14	75291419	FOS	rs2293079	2	219236065	TUBA4A/TUBA4B	dominant	0.139418	0.156971	0.929698	0.870063	protective	NA
BIOCARTA_RANKL_PATHWAY	REACTOME_COPI_MEDIATED_ANTEROGRADE_TRANSPORT	rs1051393	21	33241950	IFNAR2	rs3795820	1	112620420	CAPZA1	dominant	0.24674	0.264794	0.925524	0.909484	protective	NA
BIOCARTA_RANKL_PATHWAY	REACTOME_COPI_MEDIATED_ANTEROGRADE_TRANSPORT	rs1051393	21	33241950	IFNAR2	rs3816533	15	41841899	SPTBN5	dominant	0.135155	0.150451	0.905074	0.882445	protective	NA
BIOCARTA_RANKL_PATHWAY	REACTOME_COPI_MEDIATED_ANTEROGRADE_TRANSPORT	rs2866413	4	102635920	NFKB1	rs1586861	3	139339654	COPB2	dominant	0.139418	0.152708	0.904275	0.898873	protective	NA
BIOCARTA_RANKL_PATHWAY	REACTOME_COPI_MEDIATED_ANTEROGRADE_TRANSPORT	rs2295322	14	24210671	IRF9	rs11603023	11	118615352	ARCN1	dominant	0.475176	0.49674	0.899027	0.917282	protective	NA
BIOCARTA_RANKL_PATHWAY	REACTOME_COPI_MEDIATED_ANTEROGRADE_TRANSPORT	rs3825584	14	24118430	IRF9	rs62266876	3	129257608	COPG1	dominant	0.0925276	0.103811	0.885426	0.880222	protective	NA
BIOCARTA_RANKL_PATHWAY	REACTOME_COPI_MEDIATED_ANTEROGRADE_TRANSPORT	rs2229207	21	33241945	IFNAR2	rs62107586	19	6468320	TUBB4A	dominant	0.0932798	0.105567	0.86285	0.871637	protective	NA
BIOCARTA_RANKL_PATHWAY	REACTOME_COPI_MEDIATED_ANTEROGRADE_TRANSPORT	rs35211496	18	62354528	TNFRSF11A	rs2074404	17	46788073	NSF	dominant	0.143932	0.158977	0.851725	0.889451	protective	NA
BIOCARTA_RANKL_PATHWAY	REACTOME_COPI_MEDIATED_ANTEROGRADE_TRANSPORT	rs3825584	14	24118430	IRF9	rs1586861	3	139339654	COPB2	dominant	0.087011	0.0982949	0.849806	0.874264	protective	NA
BIOCARTA_RANKL_PATHWAY	REACTOME_COPI_MEDIATED_ANTEROGRADE_TRANSPORT	rs1805034	18	62360008	TNFRSF11A	rs7694725	4	113079800	ANK2	dominant	0.235206	0.254263	0.846995	0.901999	protective	NA
BIOCARTA_RANKL_PATHWAY	REACTOME_COPI_MEDIATED_ANTEROGRADE_TRANSPORT	rs12895416	14	75291419	FOS	rs1354680	4	112997421	ANK2	dominant	0.274323	0.292879	0.837715	0.912694	protective	NA
BIOCARTA_RANKL_PATHWAY	REACTOME_COPI_MEDIATED_ANTEROGRADE_TRANSPORT	rs12607917	18	62428753	TNFRSF11A	rs7694725	4	113079800	ANK2	dominant	0.172768	0.189819	0.800415	0.891411	protective	NA
BIOCARTA_RANKL_PATHWAY	REACTOME_COPI_MEDIATED_ANTEROGRADE_TRANSPORT	rs12801636	11	65623846	RELA	rs3742424	14	101925240	DYNC1H1	dominant	0.0561685	0.0654463	0.798167	0.849801	protective	NA
BIOCARTA_RANKL_PATHWAY	REACTOME_COPI_MEDIATED_ANTEROGRADE_TRANSPORT	rs12607917	18	62428753	TNFRSF11A	rs61729639	17	73236851	COG1	dominant	0.0471414	0.055667	0.785925	0.83927	protective	NA
BIOCARTA_RANKL_PATHWAY	REACTOME_COPI_MEDIATED_ANTEROGRADE_TRANSPORT	rs2834167	21	33268483	IFNAR2	rs6356	11	2169721	INS	dominant	0.27006	0.290371	0.779624	0.904173	protective	NA
BIOCARTA_RANKL_PATHWAY	REACTOME_COPI_MEDIATED_ANTEROGRADE_TRANSPORT	rs12895416	14	75291419	FOS	rs61729639	17	73236851	COG1	dominant	0.0498997	0.0589268	0.775871	0.838763	protective	NA
BIOCARTA_RANKL_PATHWAY	REACTOME_COPI_MEDIATED_ANTEROGRADE_TRANSPORT	rs1805034	18	62360008	TNFRSF11A	rs6356	11	2169721	INS	dominant	0.421264	0.443581	0.745519	0.913068	protective	NA
BIOCARTA_RANKL_PATHWAY	REACTOME_COPI_MEDIATED_ANTEROGRADE_TRANSPORT	rs2295322	14	24210671	IRF9	rs1201689	15	41813720	SPTBN5	dominant	0.44007	0.459378	0.71634	0.924936	protective	NA
BIOCARTA_RANKL_PATHWAY	REACTOME_COPI_MEDIATED_ANTEROGRADE_TRANSPORT	rs1051393	21	33241950	IFNAR2	rs6847598	4	75829203	USO1	dominant	0.407974	0.42653	0.713839	0.926517	protective	NA
BIOCARTA_RANKL_PATHWAY	REACTOME_COPI_MEDIATED_ANTEROGRADE_TRANSPORT	rs1805034	18	62360008	TNFRSF11A	rs2074404	17	46788073	NSF	dominant	0.295888	0.31319	0.694541	0.921541	protective	NA
BIOCARTA_RANKL_PATHWAY	REACTOME_COPI_MEDIATED_ANTEROGRADE_TRANSPORT	rs34256674	18	62361984	TNFRSF11A	rs11603023	11	118615352	ARCN1	dominant	0.483701	0.504012	0.692138	0.921947	protective	NA
BIOCARTA_RANKL_PATHWAY	REACTOME_COPI_MEDIATED_ANTEROGRADE_TRANSPORT	rs34256674	18	62361984	TNFRSF11A	rs699	1	230710048	COG2	dominant	0.480441	0.502257	0.690805	0.9164	protective	NA
BIOCARTA_RANKL_PATHWAY	REACTOME_COPI_MEDIATED_ANTEROGRADE_TRANSPORT	rs12607917	18	62428753	TNFRSF11A	rs2293079	2	219236065	TUBA4A/TUBA4B	dominant	0.122116	0.137914	0.690767	0.869521	protective	NA
BIOCARTA_RANKL_PATHWAY	REACTOME_COPI_MEDIATED_ANTEROGRADE_TRANSPORT	rs1051393	21	33241950	IFNAR2	rs11191274	10	102380593	GBF1	dominant	0.120863	0.134403	0.672727	0.885403	protective	NA
BIOCARTA_RANKL_PATHWAY	REACTOME_COPI_MEDIATED_ANTEROGRADE_TRANSPORT	rs2834167	21	33268483	IFNAR2	rs11603023	11	118615352	ARCN1	dominant	0.308927	0.327482	0.671834	0.918009	protective	NA
BIOCARTA_RANKL_PATHWAY	REACTOME_COPI_MEDIATED_ANTEROGRADE_TRANSPORT	rs2229207	21	33241945	IFNAR2	rs2074404	17	46788073	NSF	dominant	0.0619358	0.0727182	0.667703	0.841934	protective	NA
BIOCARTA_RANKL_PATHWAY	REACTOME_COPI_MEDIATED_ANTEROGRADE_TRANSPORT	rs2295322	14	24210671	IRF9	rs2023685	7	107527890	COG5	dominant	0.196841	0.214393	0.644884	0.898063	protective	NA
BIOCARTA_RANKL_PATHWAY	REACTOME_COPI_MEDIATED_ANTEROGRADE_TRANSPORT	rs35211496	18	62354528	TNFRSF11A	rs2293079	2	219236065	TUBA4A/TUBA4B	dominant	0.0812437	0.0947844	0.628637	0.84451	protective	NA
BIOCARTA_RANKL_PATHWAY	REACTOME_COPI_MEDIATED_ANTEROGRADE_TRANSPORT	rs34256674	18	62361984	TNFRSF11A	rs2293079	2	219236065	TUBA4A/TUBA4B	dominant	0.176028	0.193831	0.604056	0.888528	protective	NA
BIOCARTA_RANKL_PATHWAY	REACTOME_COPI_MEDIATED_ANTEROGRADE_TRANSPORT	rs1805034	18	62360008	TNFRSF11A	rs2023685	7	107527890	COG5	dominant	0.19659	0.213892	0.59054	0.899315	protective	NA
BIOCARTA_RANKL_PATHWAY	REACTOME_COPI_MEDIATED_ANTEROGRADE_TRANSPORT	rs34256674	18	62361984	TNFRSF11A	rs41273499	1	158562824	SPTA1	dominant	0.102558	0.114343	0.589135	0.885151	protective	NA
BIOCARTA_RANKL_PATHWAY	REACTOME_COPI_MEDIATED_ANTEROGRADE_TRANSPORT	rs2957128	18	62393502	TNFRSF11A	rs2293079	2	219236065	TUBA4A/TUBA4B	dominant	0.158225	0.175025	0.554379	0.885969	protective	NA
BIOCARTA_RANKL_PATHWAY	REACTOME_COPI_MEDIATED_ANTEROGRADE_TRANSPORT	rs1051393	21	33241950	IFNAR2	rs1586861	3	139339654	COPB2	dominant	0.102558	0.114845	0.553139	0.880787	protective	NA
BIOCARTA_RANKL_PATHWAY	REACTOME_COPI_MEDIATED_ANTEROGRADE_TRANSPORT	rs1021188	13	42541997	TNFSF11	rs4906172	14	101988596	DYNC1H1	dominant	0.109328	0.121364	0.538092	0.888653	protective	NA
BIOCARTA_RANKL_PATHWAY	REACTOME_COPI_MEDIATED_ANTEROGRADE_TRANSPORT	rs2295322	14	24210671	IRF9	rs6356	11	2169721	INS	dominant	0.422768	0.443831	0.517614	0.917784	protective	NA
BIOCARTA_RANKL_PATHWAY	REACTOME_COPI_MEDIATED_ANTEROGRADE_TRANSPORT	rs35211496	18	62354528	TNFRSF11A	rs6356	11	2169721	INS	dominant	0.196088	0.21339	0.507894	0.899142	protective	NA
BIOCARTA_RANKL_PATHWAY	REACTOME_COPI_MEDIATED_ANTEROGRADE_TRANSPORT	rs2957128	18	62393502	TNFRSF11A	rs6356	11	2169721	INS	dominant	0.379639	0.39995	0.503198	0.918138	protective	NA
BIOCARTA_RANKL_PATHWAY	REACTOME_COPI_MEDIATED_ANTEROGRADE_TRANSPORT	rs11550452	14	24184317	IRF9	rs2723088	2	65072164	RAB1A	dominant	0.119609	0.133902	0.497236	0.878757	protective	NA
BIOCARTA_RANKL_PATHWAY	REACTOME_COPI_MEDIATED_ANTEROGRADE_TRANSPORT	rs12895416	14	75291419	FOS	rs6356	11	2169721	INS	dominant	0.338014	0.357573	0.479645	0.917372	protective	NA
BIOCARTA_RANKL_PATHWAY	REACTOME_COPI_MEDIATED_ANTEROGRADE_TRANSPORT	rs34256674	18	62361984	TNFRSF11A	rs6356	11	2169721	INS	dominant	0.422267	0.443079	0.473973	0.918696	protective	NA
BIOCARTA_RANKL_PATHWAY	REACTOME_COPI_MEDIATED_ANTEROGRADE_TRANSPORT	rs1051393	21	33241950	IFNAR2	rs1802608	11	72139678	FOLR1	dominant	0.058676	0.0687061	0.471418	0.844915	protective	NA
BIOCARTA_RANKL_PATHWAY	REACTOME_COPI_MEDIATED_ANTEROGRADE_TRANSPORT	rs7589485	2	28422253	FOSL2	rs6356	11	2169721	INS	dominant	0.399448	0.419258	0.363163	0.921324	protective	NA
BIOCARTA_RANKL_PATHWAY	REACTOME_COPI_MEDIATED_ANTEROGRADE_TRANSPORT	rs1805034	18	62360008	TNFRSF11A	rs2723088	2	65072164	RAB1A	dominant	0.168756	0.184554	0.350967	0.897024	protective	NA
BIOCARTA_RANKL_PATHWAY	REACTOME_COPI_MEDIATED_ANTEROGRADE_TRANSPORT	rs11550452	14	24184317	IRF9	rs2023685	7	107527890	COG5	dominant	0.143932	0.157974	0.293458	0.896166	protective	NA
BIOCARTA_RANKL_PATHWAY	REACTOME_COPI_MEDIATED_ANTEROGRADE_TRANSPORT	rs2957128	18	62393502	TNFRSF11A	rs28568406	1	158717373	SPTA1	dominant	0.401956	0.420512	0.288723	0.926215	protective	NA
BIOCARTA_RANKL_PATHWAY	REACTOME_COPI_MEDIATED_ANTEROGRADE_TRANSPORT	rs35211496	18	62354528	TNFRSF11A	rs28568406	1	158717373	SPTA1	dominant	0.204112	0.219659	0.259669	0.911073	protective	NA
BIOCARTA_RANKL_PATHWAY	REACTOME_COPI_MEDIATED_ANTEROGRADE_TRANSPORT	rs1021188	13	42541997	TNFSF11	rs6356	11	2169721	INS	dominant	0.179037	0.194584	0.258902	0.902679	protective	NA
BIOCARTA_RANKL_PATHWAY	REACTOME_COPI_MEDIATED_ANTEROGRADE_TRANSPORT	rs3825584	14	24118430	IRF9	rs2293079	2	219236065	TUBA4A/TUBA4B	dominant	0.116851	0.130391	0.202795	0.882414	protective	NA
PID_MYC_PATHWAY	REACTOME_L1CAM_INTERACTIONS	rs4758443	11	6627193	TAF10	rs10810812	9	17586103	SH3GL2	dominant	0.364343	0.41324	5.17072	0.813854	protective	NA
PID_MYC_PATHWAY	REACTOME_L1CAM_INTERACTIONS	rs2084385	3	196826996	PAK2	rs1978973	3	105622370	ALCAM	dominant	0.0280843	0.0461384	4.62031	0.597389	protective	NA
PID_MYC_PATHWAY	REACTOME_L1CAM_INTERACTIONS	rs4977749	9	21927328	CDKN2A	rs10810812	9	17586103	SH3GL2	dominant	0.200853	0.237713	4.2527	0.805964	protective	NA
PID_MYC_PATHWAY	REACTOME_L1CAM_INTERACTIONS	rs2303100	19	9857758	PIN1	rs694739	11	64329761	RPS6KA4	dominant	0.403962	0.445587	3.87295	0.843272	protective	NA
PID_MYC_PATHWAY	REACTOME_L1CAM_INTERACTIONS	rs2303100	19	9857758	PIN1	rs353116	2	165277122	SCN2A	dominant	0.434052	0.47317	3.46841	0.853925	protective	NA
PID_MYC_PATHWAY	REACTOME_L1CAM_INTERACTIONS	rs4758443	11	6627193	TAF10	rs694739	11	64329761	RPS6KA4	dominant	0.352056	0.38992	3.31366	0.850132	protective	NA
PID_MYC_PATHWAY	REACTOME_L1CAM_INTERACTIONS	rs2303100	19	9857758	PIN1	rs28568406	1	158717373	SPTA1	dominant	0.429037	0.46665	3.30273	0.858832	protective	NA
PID_MYC_PATHWAY	REACTOME_L1CAM_INTERACTIONS	rs3799977	6	44869619	SUPT3H	rs353116	2	165277122	SCN2A	dominant	0.404213	0.442076	3.29154	0.856242	protective	NA
PID_MYC_PATHWAY	REACTOME_L1CAM_INTERACTIONS	rs2303100	19	9857758	PIN1	rs1201689	15	41813720	SPTBN5	dominant	0.416499	0.45336	3.26874	0.860659	protective	NA
PID_MYC_PATHWAY	REACTOME_L1CAM_INTERACTIONS	rs3194151	16	370140	AXIN1	rs34162626	6	13611846	RANBP9	dominant	0.0295888	0.0441324	3.12086	0.660406	protective	NA
PID_MYC_PATHWAY	REACTOME_L1CAM_INTERACTIONS	rs2303100	19	9857758	PIN1	rs10510181	3	149364	CHL1	dominant	0.375125	0.40998	3.05454	0.863948	protective	NA
PID_MYC_PATHWAY	REACTOME_L1CAM_INTERACTIONS	rs848210	1	15933318	ZBTB17	rs28568406	1	158717373	SPTA1	dominant	0.406469	0.442076	3.0081	0.864296	protective	NA
PID_MYC_PATHWAY	REACTOME_L1CAM_INTERACTIONS	rs4466998	14	65008822	MAX	rs353116	2	165277122	SCN2A	dominant	0.443079	0.480191	2.94858	0.861229	protective	NA
PID_MYC_PATHWAY	REACTOME_L1CAM_INTERACTIONS	rs2303100	19	9857758	PIN1	rs62107586	19	6468320	TUBB4A	dominant	0.447593	0.482447	2.92959	0.869217	protective	NA
PID_MYC_PATHWAY	REACTOME_L1CAM_INTERACTIONS	rs7189020	16	254804	AXIN1	rs11604757	11	1029320	AP2A2	dominant	0.131896	0.158225	2.92149	0.808315	protective	NA
PID_MYC_PATHWAY	REACTOME_L1CAM_INTERACTIONS	rs1185246	5	69419483	TAF9	rs694739	11	64329761	RPS6KA4	dominant	0.425025	0.462889	2.90972	0.857736	protective	NA
PID_MYC_PATHWAY	REACTOME_L1CAM_INTERACTIONS	rs2303100	19	9857758	PIN1	rs3018474	11	77504355	PAK1	dominant	0.454112	0.489218	2.88825	0.868548	protective	NA
PID_MYC_PATHWAY	REACTOME_L1CAM_INTERACTIONS	rs9642880	8	127705823	MYC	rs353116	2	165277122	SCN2A	dominant	0.428034	0.463641	2.88221	0.865729	protective	NA
PID_MYC_PATHWAY	REACTOME_L1CAM_INTERACTIONS	rs848210	1	15933318	ZBTB17	rs34789048	9	36169726	CLTA	dominant	0.0962889	0.117603	2.76871	0.799453	protective	NA
PID_MYC_PATHWAY	REACTOME_L1CAM_INTERACTIONS	rs3799977	6	44869619	SUPT3H	rs11979158	7	55091656	EGFR	dominant	0.163741	0.189569	2.70905	0.83708	protective	NA
PID_MYC_PATHWAY	REACTOME_L1CAM_INTERACTIONS	rs2303100	19	9857758	PIN1	rs2293079	2	219236065	TUBA4A/TUBA4B	dominant	0.168756	0.195336	2.70743	0.836303	protective	NA
PID_MYC_PATHWAY	REACTOME_L1CAM_INTERACTIONS	rs848210	1	15933318	ZBTB17	rs353116	2	165277122	SCN2A	dominant	0.403711	0.438064	2.70036	0.868486	protective	NA
PID_MYC_PATHWAY	REACTOME_L1CAM_INTERACTIONS	rs3799977	6	44869619	SUPT3H	rs28568406	1	158717373	SPTA1	dominant	0.401454	0.434554	2.61789	0.872744	protective	NA
PID_MYC_PATHWAY	REACTOME_L1CAM_INTERACTIONS	rs9642880	8	127705823	MYC	rs2293079	2	219236065	TUBA4A/TUBA4B	dominant	0.161234	0.187061	2.61492	0.83539	protective	NA
PID_MYC_PATHWAY	REACTOME_L1CAM_INTERACTIONS	rs2303100	19	9857758	PIN1	rs7694725	4	113079800	ANK2	dominant	0.227182	0.255517	2.61056	0.856508	protective	NA
PID_MYC_PATHWAY	REACTOME_L1CAM_INTERACTIONS	rs9642880	8	127705823	MYC	rs28568406	1	158717373	SPTA1	dominant	0.419759	0.452859	2.57649	0.874036	protective	NA
PID_MYC_PATHWAY	REACTOME_L1CAM_INTERACTIONS	rs400037	16	286396	AXIN1	rs62107586	19	6468320	TUBB4A	dominant	0.217402	0.244985	2.57046	0.856134	protective	NA
PID_MYC_PATHWAY	REACTOME_L1CAM_INTERACTIONS	rs4977749	9	21927328	CDKN2A	rs1011731	1	172377408	DNM3	dominant	0.218154	0.245988	2.54437	0.855279	protective	NA
PID_MYC_PATHWAY	REACTOME_L1CAM_INTERACTIONS	rs3194151	16	370140	AXIN1	rs2227983	7	55161562	EGFR	dominant	0.1334	0.157472	2.53552	0.823602	protective	NA
PID_MYC_PATHWAY	REACTOME_L1CAM_INTERACTIONS	rs4758443	11	6627193	TAF10	rs1531545	5	52897456	ITGA1	dominant	0.435055	0.467151	2.53154	0.878384	protective	NA
PID_MYC_PATHWAY	REACTOME_L1CAM_INTERACTIONS	rs2303100	19	9857758	PIN1	rs17519184	18	6986715	LAMA1	dominant	0.405717	0.439067	2.52027	0.872188	protective	NA
PID_MYC_PATHWAY	REACTOME_L1CAM_INTERACTIONS	rs4977749	9	21927328	CDKN2A	rs1531545	5	52897456	ITGA1	dominant	0.241224	0.268806	2.51937	0.864767	protective	NA
PID_MYC_PATHWAY	REACTOME_L1CAM_INTERACTIONS	rs1185246	5	69419483	TAF9	rs2293079	2	219236065	TUBA4A/TUBA4B	dominant	0.171515	0.199097	2.50492	0.83278	protective	NA
PID_MYC_PATHWAY	REACTOME_L1CAM_INTERACTIONS	rs4758443	11	6627193	TAF10	rs9853984	3	38608689	SCN5A	dominant	0.382397	0.412989	2.48641	0.880062	protective	NA
PID_MYC_PATHWAY	REACTOME_L1CAM_INTERACTIONS	rs4977749	9	21927328	CDKN2A	rs314253	17	7188331	DLG4	dominant	0.175527	0.200602	2.48209	0.848388	protective	NA
PID_MYC_PATHWAY	REACTOME_L1CAM_INTERACTIONS	rs3194151	16	370140	AXIN1	rs3922844	3	38582762	SCN5A	dominant	0.154213	0.178034	2.47213	0.841801	protective	NA
PID_MYC_PATHWAY	REACTOME_L1CAM_INTERACTIONS	rs3194151	16	370140	AXIN1	rs746463	11	110125219	RDX	dominant	0.152708	0.177533	2.43548	0.834968	protective	NA
PID_MYC_PATHWAY	REACTOME_L1CAM_INTERACTIONS	rs4977749	9	21927328	CDKN2A	rs353116	2	165277122	SCN2A	dominant	0.204363	0.232698	2.39862	0.846956	protective	NA
PID_MYC_PATHWAY	REACTOME_L1CAM_INTERACTIONS	rs3799977	6	44869619	SUPT3H	rs9853984	3	38608689	SCN5A	dominant	0.421515	0.452859	2.3865	0.880354	protective	NA
PID_MYC_PATHWAY	REACTOME_L1CAM_INTERACTIONS	rs3194151	16	370140	AXIN1	rs694739	11	64329761	RPS6KA4	dominant	0.175527	0.20336	2.36624	0.833993	protective	NA
PID_MYC_PATHWAY	REACTOME_L1CAM_INTERACTIONS	rs7189020	16	254804	AXIN1	rs694739	11	64329761	RPS6KA4	dominant	0.365848	0.398696	2.35867	0.870079	protective	NA
PID_MYC_PATHWAY	REACTOME_L1CAM_INTERACTIONS	rs2303100	19	9857758	PIN1	rs10810812	9	17586103	SH3GL2	dominant	0.439569	0.471414	2.35599	0.879462	protective	NA
PID_MYC_PATHWAY	REACTOME_L1CAM_INTERACTIONS	rs4977749	9	21927328	CDKN2A	rs607230	18	6980524	LAMA1	dominant	0.157222	0.180792	2.35477	0.845304	protective	NA
PID_MYC_PATHWAY	REACTOME_L1CAM_INTERACTIONS	rs6776064	3	196708663	PAK2	rs11979158	7	55091656	EGFR	dominant	0.141675	0.164995	2.32077	0.835333	protective	NA
PID_MYC_PATHWAY	REACTOME_L1CAM_INTERACTIONS	rs4758443	11	6627193	TAF10	rs1201689	15	41813720	SPTBN5	dominant	0.363089	0.392929	2.32049	0.880766	protective	NA
PID_MYC_PATHWAY	REACTOME_L1CAM_INTERACTIONS	rs2166799	3	196820667	PAK2	rs71377306	17	47347921	ITGB3	dominant	0.0621866	0.0787362	2.30797	0.775871	protective	NA
PID_MYC_PATHWAY	REACTOME_L1CAM_INTERACTIONS	rs3799977	6	44869619	SUPT3H	rs11604757	11	1029320	AP2A2	dominant	0.141174	0.162989	2.29762	0.844152	protective	NA
PID_MYC_PATHWAY	REACTOME_L1CAM_INTERACTIONS	rs4977749	9	21927328	CDKN2A	rs2977852	8	41631133	ANK1	dominant	0.228435	0.257272	2.29035	0.854729	protective	NA
PID_MYC_PATHWAY	REACTOME_L1CAM_INTERACTIONS	rs2303100	19	9857758	PIN1	rs1531545	5	52897456	ITGA1	dominant	0.512538	0.542126	2.28472	0.888034	protective	NA
PID_MYC_PATHWAY	REACTOME_L1CAM_INTERACTIONS	rs4758443	11	6627193	TAF10	rs2403730	8	132079891	KCNQ3	dominant	0.323972	0.352056	2.25693	0.881999	protective	NA
PID_MYC_PATHWAY	REACTOME_L1CAM_INTERACTIONS	rs753307	19	49015227	RUVBL2	rs71377306	17	47347921	ITGB3	dominant	0.0677031	0.0845035	2.25206	0.786749	protective	NA
PID_MYC_PATHWAY	REACTOME_L1CAM_INTERACTIONS	rs3765148	19	48944456	RUVBL2	rs4733951	8	38512313	FGFR1	dominant	0.0396189	0.0529087	2.25111	0.738453	protective	NA
PID_MYC_PATHWAY	REACTOME_L1CAM_INTERACTIONS	rs2303100	19	9857758	PIN1	rs1011731	1	172377408	DNM3	dominant	0.460381	0.491725	2.22388	0.881874	protective	NA
PID_MYC_PATHWAY	REACTOME_L1CAM_INTERACTIONS	rs6776064	3	196708663	PAK2	rs7694725	4	113079800	ANK2	dominant	0.172518	0.196841	2.21907	0.850671	protective	NA
PID_MYC_PATHWAY	REACTOME_L1CAM_INTERACTIONS	rs2303100	19	9857758	PIN1	rs11071896	15	66528912	MAP2K1	dominant	0.323972	0.351805	2.18259	0.882969	protective	NA
PID_MYC_PATHWAY	REACTOME_L1CAM_INTERACTIONS	rs4758443	11	6627193	TAF10	rs7694725	4	113079800	ANK2	dominant	0.192076	0.216901	2.17531	0.85834	protective	NA
PID_MYC_PATHWAY	REACTOME_L1CAM_INTERACTIONS	rs3799977	6	44869619	SUPT3H	rs71377306	17	47347921	ITGB3	dominant	0.0581745	0.0739719	2.17112	0.77325	protective	NA
PID_MYC_PATHWAY	REACTOME_L1CAM_INTERACTIONS	rs743580	15	74035775	PML	rs353116	2	165277122	SCN2A	dominant	0.458124	0.490221	2.1697	0.879173	protective	NA
PID_MYC_PATHWAY	REACTOME_L1CAM_INTERACTIONS	rs4758443	11	6627193	TAF10	rs3816533	15	41841899	SPTBN5	dominant	0.152207	0.174273	2.16077	0.850649	protective	NA
PID_MYC_PATHWAY	REACTOME_L1CAM_INTERACTIONS	rs848210	1	15933318	ZBTB17	rs71377306	17	47347921	ITGB3	dominant	0.0619358	0.077984	2.15155	0.780625	protective	NA
PID_MYC_PATHWAY	REACTOME_L1CAM_INTERACTIONS	rs3194151	16	370140	AXIN1	rs2300014	7	108297798	NRCAM	dominant	0.207623	0.231695	2.14873	0.86888	protective	NA
PID_MYC_PATHWAY	REACTOME_L1CAM_INTERACTIONS	rs3799977	6	44869619	SUPT3H	rs3018474	11	77504355	PAK1	dominant	0.431795	0.460883	2.11505	0.888927	protective	NA
PID_MYC_PATHWAY	REACTOME_L1CAM_INTERACTIONS	rs3765148	19	48944456	RUVBL2	rs11979158	7	55091656	EGFR	dominant	0.0275827	0.0391174	2.09813	0.696764	protective	NA
PID_MYC_PATHWAY	REACTOME_L1CAM_INTERACTIONS	rs4466998	14	65008822	MAX	rs34789048	9	36169726	CLTA	dominant	0.107322	0.126881	2.08787	0.827317	protective	NA
PID_MYC_PATHWAY	REACTOME_L1CAM_INTERACTIONS	rs2084385	3	196826996	PAK2	rs11979158	7	55091656	EGFR	dominant	0.0551655	0.0699599	2.07716	0.776184	protective	NA
PID_MYC_PATHWAY	REACTOME_L1CAM_INTERACTIONS	rs11040923	11	6563777	TAF10	rs1978973	3	105622370	ALCAM	dominant	0.10682	0.126379	2.07226	0.826729	protective	NA
PID_MYC_PATHWAY	REACTOME_L1CAM_INTERACTIONS	rs4758443	11	6627193	TAF10	rs2283125	9	133727220	VAV2	dominant	0.2999	0.325978	2.06836	0.885731	protective	NA
PID_MYC_PATHWAY	REACTOME_L1CAM_INTERACTIONS	rs3799977	6	44869619	SUPT3H	rs62244081	3	38771518	SCN10A	dominant	0.284102	0.309178	2.01853	0.886711	protective	NA
PID_MYC_PATHWAY	REACTOME_L1CAM_INTERACTIONS	rs3799977	6	44869619	SUPT3H	rs3759786	15	66337065	MAP2K1	dominant	0.172518	0.194584	2.01448	0.862955	protective	NA
PID_MYC_PATHWAY	REACTOME_L1CAM_INTERACTIONS	rs3194151	16	370140	AXIN1	rs7694725	4	113079800	ANK2	dominant	0.0980441	0.117603	2.01368	0.81561	protective	NA
PID_MYC_PATHWAY	REACTOME_L1CAM_INTERACTIONS	rs2084385	3	196826996	PAK2	rs7694725	4	113079800	ANK2	dominant	0.0682046	0.0855065	2.0075	0.782843	protective	NA
PID_MYC_PATHWAY	REACTOME_L1CAM_INTERACTIONS	rs848210	1	15933318	ZBTB17	rs7694725	4	113079800	ANK2	dominant	0.213641	0.238215	2.00222	0.868816	protective	NA
PID_MYC_PATHWAY	REACTOME_L1CAM_INTERACTIONS	rs2166799	3	196820667	PAK2	rs2293079	2	219236065	TUBA4A/TUBA4B	dominant	0.168004	0.191324	1.99966	0.8535	protective	NA
PID_MYC_PATHWAY	REACTOME_L1CAM_INTERACTIONS	rs3799977	6	44869619	SUPT3H	rs2721876	8	132515828	KCNQ3	dominant	0.342277	0.374122	1.99469	0.870583	protective	NA
PID_MYC_PATHWAY	REACTOME_L1CAM_INTERACTIONS	rs3799977	6	44869619	SUPT3H	rs1201689	15	41813720	SPTBN5	dominant	0.394183	0.422016	1.99116	0.891133	protective	NA
PID_MYC_PATHWAY	REACTOME_L1CAM_INTERACTIONS	rs4977749	9	21927328	CDKN2A	rs1201689	15	41813720	SPTBN5	dominant	0.199097	0.22317	1.98923	0.865321	protective	NA
PID_MYC_PATHWAY	REACTOME_L1CAM_INTERACTIONS	rs4977749	9	21927328	CDKN2A	rs10510181	3	149364	CHL1	dominant	0.177031	0.2001	1.95835	0.859912	protective	NA
PID_MYC_PATHWAY	REACTOME_L1CAM_INTERACTIONS	rs1185246	5	69419483	TAF9	rs353116	2	165277122	SCN2A	dominant	0.456118	0.486209	1.91782	0.886211	protective	NA
PID_MYC_PATHWAY	REACTOME_L1CAM_INTERACTIONS	rs2303100	19	9857758	PIN1	rs1801475	20	63406924	KCNQ2	dominant	0.402207	0.428786	1.91781	0.896305	protective	NA
PID_MYC_PATHWAY	REACTOME_L1CAM_INTERACTIONS	rs4977749	9	21927328	CDKN2A	rs1801475	20	63406924	KCNQ2	dominant	0.188566	0.210883	1.91525	0.869581	protective	NA
PID_MYC_PATHWAY	REACTOME_L1CAM_INTERACTIONS	rs2303100	19	9857758	PIN1	rs16915157	10	60586880	ANK3	dominant	0.235958	0.259779	1.90802	0.879982	protective	NA
PID_MYC_PATHWAY	REACTOME_L1CAM_INTERACTIONS	rs6776064	3	196708663	PAK2	rs2228479	16	89919532	TUBB3	dominant	0.0777332	0.0935306	1.89994	0.816863	protective	NA
PID_MYC_PATHWAY	REACTOME_L1CAM_INTERACTIONS	rs4977749	9	21927328	CDKN2A	rs584427	11	113233274	NCAM1	dominant	0.242728	0.266299	1.89071	0.883117	protective	NA
PID_MYC_PATHWAY	REACTOME_L1CAM_INTERACTIONS	rs3799977	6	44869619	SUPT3H	rs62587579	9	137216103	TUBB4B	dominant	0.0591775	0.0732197	1.88775	0.796156	protective	NA
PID_MYC_PATHWAY	REACTOME_L1CAM_INTERACTIONS	rs2303100	19	9857758	PIN1	rs723077	11	113323446	NCAM1	dominant	0.522317	0.548646	1.87399	0.899538	protective	NA
PID_MYC_PATHWAY	REACTOME_L1CAM_INTERACTIONS	rs3194151	16	370140	AXIN1	rs607230	18	6980524	LAMA1	dominant	0.153711	0.173771	1.86131	0.863593	protective	NA
PID_MYC_PATHWAY	REACTOME_L1CAM_INTERACTIONS	rs4758443	11	6627193	TAF10	rs10510181	3	149364	CHL1	dominant	0.323972	0.35005	1.86076	0.8898	protective	NA
PID_MYC_PATHWAY	REACTOME_L1CAM_INTERACTIONS	rs848210	1	15933318	ZBTB17	rs286592	5	154996537	KIF4B	dominant	0.368104	0.395687	1.85029	0.889684	protective	NA
PID_MYC_PATHWAY	REACTOME_L1CAM_INTERACTIONS	rs3765148	19	48944456	RUVBL2	rs2403730	8	132079891	KCNQ3	dominant	0.059679	0.0737212	1.84539	0.797435	protective	NA
PID_MYC_PATHWAY	REACTOME_L1CAM_INTERACTIONS	rs11040923	11	6563777	TAF10	rs7694725	4	113079800	ANK2	dominant	0.237212	0.261535	1.84459	0.878078	protective	NA
PID_MYC_PATHWAY	REACTOME_L1CAM_INTERACTIONS	rs4977749	9	21927328	CDKN2A	rs6598858	1	26583274	RPS6KA1	dominant	0.2332	0.256269	1.84245	0.882604	protective	NA
PID_MYC_PATHWAY	REACTOME_L1CAM_INTERACTIONS	rs2166799	3	196820667	PAK2	rs41273499	1	158562824	SPTA1	dominant	0.0960381	0.113089	1.83916	0.833205	protective	NA
PID_MYC_PATHWAY	REACTOME_L1CAM_INTERACTIONS	rs2303100	19	9857758	PIN1	rs34789048	9	36169726	CLTA	dominant	0.102307	0.120361	1.83515	0.832905	protective	NA
PID_MYC_PATHWAY	REACTOME_L1CAM_INTERACTIONS	rs2303100	19	9857758	PIN1	rs177389	14	73260801	NUMB	dominant	0.503761	0.52984	1.83241	0.900816	protective	NA
PID_MYC_PATHWAY	REACTOME_L1CAM_INTERACTIONS	rs2303100	19	9857758	PIN1	rs2300014	7	108297798	NRCAM	dominant	0.481946	0.508024	1.82652	0.900913	protective	NA
PID_MYC_PATHWAY	REACTOME_L1CAM_INTERACTIONS	rs3799977	6	44869619	SUPT3H	rs62107586	19	6468320	TUBB4A	dominant	0.427533	0.453109	1.82109	0.901397	protective	NA
PID_MYC_PATHWAY	REACTOME_L1CAM_INTERACTIONS	rs739999	16	269512	AXIN1	rs10875943	12	49282227	TUBA1C	dominant	0.0837513	0.100552	1.82016	0.817645	protective	NA
PID_MYC_PATHWAY	REACTOME_L1CAM_INTERACTIONS	rs743580	15	74035775	PML	rs2293079	2	219236065	TUBA4A/TUBA4B	dominant	0.17653	0.199348	1.81418	0.860996	protective	NA
PID_MYC_PATHWAY	REACTOME_L1CAM_INTERACTIONS	rs11040923	11	6563777	TAF10	rs41273499	1	158562824	SPTA1	dominant	0.0982949	0.115848	1.81325	0.831968	protective	NA
PID_MYC_PATHWAY	REACTOME_L1CAM_INTERACTIONS	rs3799977	6	44869619	SUPT3H	rs694739	11	64329761	RPS6KA4	dominant	0.382146	0.412237	1.81196	0.881861	protective	NA
PID_MYC_PATHWAY	REACTOME_L1CAM_INTERACTIONS	rs2303100	19	9857758	PIN1	rs2283125	9	133727220	VAV2	dominant	0.359077	0.384403	1.80622	0.897205	protective	NA
PID_MYC_PATHWAY	REACTOME_L1CAM_INTERACTIONS	rs4977749	9	21927328	CDKN2A	rs3922844	3	38582762	SCN5A	dominant	0.177282	0.198596	1.80541	0.86955	protective	NA
PID_MYC_PATHWAY	REACTOME_L1CAM_INTERACTIONS	rs3194151	16	370140	AXIN1	rs62107586	19	6468320	TUBB4A	dominant	0.195085	0.21665	1.79607	0.876338	protective	NA
PID_MYC_PATHWAY	REACTOME_L1CAM_INTERACTIONS	rs4758443	11	6627193	TAF10	rs2303361	7	6409865	RAC1	dominant	0.216399	0.238465	1.78201	0.881912	protective	NA
PID_MYC_PATHWAY	REACTOME_L1CAM_INTERACTIONS	rs3765148	19	48944456	RUVBL2	rs13164431	5	52868086	ITGA1	dominant	0.0737212	0.0885155	1.77854	0.819559	protective	NA
PID_MYC_PATHWAY	REACTOME_L1CAM_INTERACTIONS	rs2303100	19	9857758	PIN1	rs805262	6	31660956	CSNK2B	dominant	0.509779	0.535356	1.77165	0.902544	protective	NA
PID_MYC_PATHWAY	REACTOME_L1CAM_INTERACTIONS	rs4758443	11	6627193	TAF10	rs11071896	15	66528912	MAP2K1	dominant	0.277332	0.301655	1.76996	0.888425	protective	NA
PID_MYC_PATHWAY	REACTOME_L1CAM_INTERACTIONS	rs4758443	11	6627193	TAF10	rs177389	14	73260801	NUMB	dominant	0.43004	0.455115	1.76869	0.903333	protective	NA
PID_MYC_PATHWAY	REACTOME_L1CAM_INTERACTIONS	rs3799977	6	44869619	SUPT3H	rs20559	1	183130425	LAMC1	dominant	0.0649448	0.078987	1.76683	0.809875	protective	NA
PID_MYC_PATHWAY	REACTOME_L1CAM_INTERACTIONS	rs2084385	3	196826996	PAK2	rs73009507	19	10850348	DNM2	dominant	0.0240722	0.0338516	1.76069	0.703985	protective	NA
PID_MYC_PATHWAY	REACTOME_L1CAM_INTERACTIONS	rs3194151	16	370140	AXIN1	rs2281053	6	166447508	RPS6KA2	dominant	0.026329	0.0366098	1.7597	0.711584	protective	NA
PID_MYC_PATHWAY	REACTOME_L1CAM_INTERACTIONS	rs4466998	14	65008822	MAX	rs28568406	1	158717373	SPTA1	dominant	0.439067	0.466901	1.74556	0.893725	protective	NA
PID_MYC_PATHWAY	REACTOME_L1CAM_INTERACTIONS	rs4758443	11	6627193	TAF10	rs6699312	1	171836182	DNM3	dominant	0.43681	0.461635	1.72633	0.904517	protective	NA
PID_MYC_PATHWAY	REACTOME_L1CAM_INTERACTIONS	rs6776064	3	196708663	PAK2	rs694739	11	64329761	RPS6KA4	dominant	0.315446	0.344032	1.72498	0.878621	protective	NA
PID_MYC_PATHWAY	REACTOME_L1CAM_INTERACTIONS	rs7189020	16	254804	AXIN1	rs20559	1	183130425	LAMC1	dominant	0.0604313	0.0739719	1.70986	0.805176	protective	NA
PID_MYC_PATHWAY	REACTOME_L1CAM_INTERACTIONS	rs1122326	17	42122855	KAT2A	rs34789048	9	36169726	CLTA	dominant	0.0569208	0.0707121	1.70621	0.793193	protective	NA
PID_MYC_PATHWAY	REACTOME_L1CAM_INTERACTIONS	rs2303100	19	9857758	PIN1	rs11129795	3	38547672	SCN5A	dominant	0.282598	0.305918	1.68898	0.893742	protective	NA
PID_MYC_PATHWAY	REACTOME_L1CAM_INTERACTIONS	rs4758443	11	6627193	TAF10	rs11979158	7	55091656	EGFR	dominant	0.158726	0.178285	1.68829	0.869597	protective	NA
PID_MYC_PATHWAY	REACTOME_L1CAM_INTERACTIONS	rs4758443	11	6627193	TAF10	rs805262	6	31660956	CSNK2B	dominant	0.43656	0.460883	1.68174	0.906335	protective	NA
PID_MYC_PATHWAY	REACTOME_L1CAM_INTERACTIONS	rs7189020	16	254804	AXIN1	rs1978973	3	105622370	ALCAM	dominant	0.0892678	0.105567	1.67694	0.830472	protective	NA
PID_MYC_PATHWAY	REACTOME_L1CAM_INTERACTIONS	rs2303100	19	9857758	PIN1	rs584427	11	113233274	NCAM1	dominant	0.508526	0.53335	1.67614	0.905296	protective	NA
PID_MYC_PATHWAY	REACTOME_L1CAM_INTERACTIONS	rs2303100	19	9857758	PIN1	rs746463	11	110125219	RDX	dominant	0.361334	0.385657	1.67458	0.901249	protective	NA
PID_MYC_PATHWAY	REACTOME_L1CAM_INTERACTIONS	rs4758443	11	6627193	TAF10	rs11604757	11	1029320	AP2A2	dominant	0.130642	0.148947	1.67395	0.858636	protective	NA
PID_MYC_PATHWAY	REACTOME_L1CAM_INTERACTIONS	rs2303100	19	9857758	PIN1	rs2303361	7	6409865	RAC1	dominant	0.252006	0.274574	1.67068	0.890117	protective	NA
PID_MYC_PATHWAY	REACTOME_L1CAM_INTERACTIONS	rs2084385	3	196826996	PAK2	rs2776937	10	33317261	NRP1	dominant	0.0910231	0.10657	1.66479	0.839509	protective	NA
PID_MYC_PATHWAY	REACTOME_L1CAM_INTERACTIONS	rs4758443	11	6627193	TAF10	rs62107586	19	6468320	TUBB4A	dominant	0.390923	0.414995	1.66	0.904764	protective	NA
PID_MYC_PATHWAY	REACTOME_L1CAM_INTERACTIONS	rs400037	16	286396	AXIN1	rs805262	6	31660956	CSNK2B	dominant	0.248997	0.270562	1.65793	0.893871	protective	NA
PID_MYC_PATHWAY	REACTOME_L1CAM_INTERACTIONS	rs9642880	8	127705823	MYC	rs20559	1	183130425	LAMC1	dominant	0.0672016	0.080993	1.65704	0.817454	protective	NA
PID_MYC_PATHWAY	REACTOME_L1CAM_INTERACTIONS	rs4977749	9	21927328	CDKN2A	rs3826408	17	7197973	DLG4	dominant	0.239468	0.262788	1.65549	0.883318	protective	NA
PID_MYC_PATHWAY	REACTOME_L1CAM_INTERACTIONS	rs3799977	6	44869619	SUPT3H	rs41273499	1	158562824	SPTA1	dominant	0.0920261	0.107573	1.64529	0.84083	protective	NA
PID_MYC_PATHWAY	REACTOME_L1CAM_INTERACTIONS	rs3765148	19	48944456	RUVBL2	rs10956647	8	132190597	KCNQ3	dominant	0.0561685	0.0697091	1.64291	0.794196	protective	NA
PID_MYC_PATHWAY	REACTOME_L1CAM_INTERACTIONS	rs7189020	16	254804	AXIN1	rs62244081	3	38771518	SCN10A	dominant	0.27683	0.2999	1.63921	0.893631	protective	NA
PID_MYC_PATHWAY	REACTOME_L1CAM_INTERACTIONS	rs3765148	19	48944456	RUVBL2	rs2300014	7	108297798	NRCAM	dominant	0.0757272	0.0897693	1.63427	0.830759	protective	NA
PID_MYC_PATHWAY	REACTOME_L1CAM_INTERACTIONS	rs400037	16	286396	AXIN1	rs11071896	15	66528912	MAP2K1	dominant	0.15346	0.173521	1.63122	0.863436	protective	NA
PID_MYC_PATHWAY	REACTOME_L1CAM_INTERACTIONS	rs4977749	9	21927328	CDKN2A	rs11604757	11	1029320	AP2A2	dominant	0.0687061	0.0837513	1.63007	0.807106	protective	NA
PID_MYC_PATHWAY	REACTOME_L1CAM_INTERACTIONS	rs4977749	9	21927328	CDKN2A	rs723077	11	113323446	NCAM1	dominant	0.249749	0.271815	1.62979	0.891795	protective	NA
PID_MYC_PATHWAY	REACTOME_L1CAM_INTERACTIONS	rs9642880	8	127705823	MYC	rs7694725	4	113079800	ANK2	dominant	0.233701	0.25677	1.62809	0.882756	protective	NA
PID_MYC_PATHWAY	REACTOME_L1CAM_INTERACTIONS	rs3194151	16	370140	AXIN1	rs20559	1	183130425	LAMC1	dominant	0.0260782	0.0361083	1.62623	0.714784	protective	NA
PID_MYC_PATHWAY	REACTOME_L1CAM_INTERACTIONS	rs3194151	16	370140	AXIN1	rs6699312	1	171836182	DNM3	dominant	0.219659	0.239719	1.62359	0.892762	protective	NA
PID_MYC_PATHWAY	REACTOME_L1CAM_INTERACTIONS	rs35599968	11	6623196	TAF10	rs1201689	15	41813720	SPTBN5	dominant	0.0722166	0.0882648	1.62325	0.804029	protective	NA
PID_MYC_PATHWAY	REACTOME_L1CAM_INTERACTIONS	rs4977749	9	21927328	CDKN2A	rs7006290	8	41757620	ANK1	dominant	0.183551	0.203862	1.597	0.87797	protective	NA
PID_MYC_PATHWAY	REACTOME_L1CAM_INTERACTIONS	rs848210	1	15933318	ZBTB17	rs280371	12	41114842	CNTN1	dominant	0.113089	0.128636	1.59462	0.863732	protective	NA
PID_MYC_PATHWAY	REACTOME_L1CAM_INTERACTIONS	rs3799977	6	44869619	SUPT3H	rs1531545	5	52897456	ITGA1	dominant	0.480191	0.503511	1.59084	0.910901	protective	NA
PID_MYC_PATHWAY	REACTOME_L1CAM_INTERACTIONS	rs3194151	16	370140	AXIN1	rs805262	6	31660956	CSNK2B	dominant	0.221916	0.241725	1.58587	0.894677	protective	NA
PID_MYC_PATHWAY	REACTOME_L1CAM_INTERACTIONS	rs4758443	11	6627193	TAF10	rs303819	12	51821318	SCN8A	dominant	0.149198	0.167753	1.58317	0.86999	protective	NA
PID_MYC_PATHWAY	REACTOME_L1CAM_INTERACTIONS	rs848210	1	15933318	ZBTB17	rs2293079	2	219236065	TUBA4A/TUBA4B	dominant	0.157222	0.178285	1.58089	0.859817	protective	NA
PID_MYC_PATHWAY	REACTOME_L1CAM_INTERACTIONS	rs4977749	9	21927328	CDKN2A	rs62244081	3	38771518	SCN10A	dominant	0.142929	0.161735	1.57763	0.86433	protective	NA
PID_MYC_PATHWAY	REACTOME_L1CAM_INTERACTIONS	rs4466998	14	65008822	MAX	rs7694725	4	113079800	ANK2	dominant	0.234704	0.257523	1.57672	0.884218	protective	NA
PID_MYC_PATHWAY	REACTOME_L1CAM_INTERACTIONS	rs9642880	8	127705823	MYC	rs694739	11	64329761	RPS6KA4	dominant	0.403711	0.432798	1.57258	0.887291	protective	NA
PID_MYC_PATHWAY	REACTOME_L1CAM_INTERACTIONS	rs4977749	9	21927328	CDKN2A	rs3827496	3	115622053	GAP43	dominant	0.243731	0.265296	1.56597	0.892518	protective	NA
PID_MYC_PATHWAY	REACTOME_L1CAM_INTERACTIONS	rs739999	16	269512	AXIN1	rs20559	1	183130425	LAMC1	dominant	0.0130391	0.0208124	1.55998	0.621572	protective	NA
PID_MYC_PATHWAY	REACTOME_L1CAM_INTERACTIONS	rs4758443	11	6627193	TAF10	rs2776937	10	33317261	NRP1	dominant	0.263039	0.284604	1.55856	0.897185	protective	NA
PID_MYC_PATHWAY	REACTOME_L1CAM_INTERACTIONS	rs2303100	19	9857758	PIN1	rs303819	12	51821318	SCN8A	dominant	0.172518	0.192076	1.54395	0.876943	protective	NA
PID_MYC_PATHWAY	REACTOME_L1CAM_INTERACTIONS	rs848210	1	15933318	ZBTB17	rs2283125	9	133727220	VAV2	dominant	0.332999	0.355065	1.53991	0.906826	protective	NA
PID_MYC_PATHWAY	REACTOME_L1CAM_INTERACTIONS	rs3765148	19	48944456	RUVBL2	rs8478	3	184182044	AP2M1	dominant	0.0368606	0.0476429	1.53927	0.765023	protective	NA
PID_MYC_PATHWAY	REACTOME_L1CAM_INTERACTIONS	rs3799977	6	44869619	SUPT3H	rs7694725	4	113079800	ANK2	dominant	0.21339	0.235456	1.53714	0.88086	protective	NA
PID_MYC_PATHWAY	REACTOME_L1CAM_INTERACTIONS	rs2166799	3	196820667	PAK2	rs694739	11	64329761	RPS6KA4	dominant	0.419007	0.448094	1.5351	0.888272	protective	NA
PID_MYC_PATHWAY	REACTOME_L1CAM_INTERACTIONS	rs4758443	11	6627193	TAF10	rs584427	11	113233274	NCAM1	dominant	0.44007	0.463139	1.52921	0.911042	protective	NA
PID_MYC_PATHWAY	REACTOME_L1CAM_INTERACTIONS	rs6776064	3	196708663	PAK2	rs12344583	9	133858398	VAV2	dominant	0.180792	0.201354	1.5281	0.875347	protective	NA
PID_MYC_PATHWAY	REACTOME_L1CAM_INTERACTIONS	rs848210	1	15933318	ZBTB17	rs9853984	3	38608689	SCN5A	dominant	0.423521	0.44659	1.52537	0.910393	protective	NA
PID_MYC_PATHWAY	REACTOME_L1CAM_INTERACTIONS	rs3194151	16	370140	AXIN1	rs10810812	9	17586103	SH3GL2	dominant	0.190321	0.212889	1.51965	0.869075	protective	NA
PID_MYC_PATHWAY	REACTOME_L1CAM_INTERACTIONS	rs3799977	6	44869619	SUPT3H	rs12357206	10	60030625	ANK3	dominant	0.478435	0.502758	1.51473	0.907242	protective	NA
PID_MYC_PATHWAY	REACTOME_L1CAM_INTERACTIONS	rs3765148	19	48944456	RUVBL2	rs10510181	3	149364	CHL1	dominant	0.0591775	0.0737212	1.51112	0.790312	protective	NA
PID_MYC_PATHWAY	REACTOME_L1CAM_INTERACTIONS	rs4977749	9	21927328	CDKN2A	rs28568406	1	158717373	SPTA1	dominant	0.2001	0.222668	1.50329	0.873295	protective	NA
PID_MYC_PATHWAY	REACTOME_L1CAM_INTERACTIONS	rs4758443	11	6627193	TAF10	rs1380453	10	60274597	ANK3	dominant	0.439569	0.462387	1.49888	0.911944	protective	NA
PID_MYC_PATHWAY	REACTOME_L1CAM_INTERACTIONS	rs2166799	3	196820667	PAK2	rs353116	2	165277122	SCN2A	dominant	0.443831	0.471414	1.49461	0.894797	protective	NA
PID_MYC_PATHWAY	REACTOME_L1CAM_INTERACTIONS	rs4977749	9	21927328	CDKN2A	rs694739	11	64329761	RPS6KA4	dominant	0.192076	0.216399	1.48476	0.86088	protective	NA
PID_MYC_PATHWAY	REACTOME_L1CAM_INTERACTIONS	rs3799977	6	44869619	SUPT3H	rs1011731	1	172377408	DNM3	dominant	0.432798	0.457623	1.48373	0.904361	protective	NA
PID_MYC_PATHWAY	REACTOME_L1CAM_INTERACTIONS	rs848210	1	15933318	ZBTB17	rs62587579	9	137216103	TUBB4B	dominant	0.0616851	0.0734704	1.48187	0.829045	protective	NA
PID_MYC_PATHWAY	REACTOME_L1CAM_INTERACTIONS	rs4758443	11	6627193	TAF10	rs2300014	7	108297798	NRCAM	dominant	0.408475	0.431043	1.47872	0.91149	protective	NA
PID_MYC_PATHWAY	REACTOME_L1CAM_INTERACTIONS	rs2084385	3	196826996	PAK2	rs34789048	9	36169726	CLTA	dominant	0.0330993	0.0438816	1.47648	0.745874	protective	NA
PID_MYC_PATHWAY	REACTOME_L1CAM_INTERACTIONS	rs4758443	11	6627193	TAF10	rs353116	2	165277122	SCN2A	dominant	0.378887	0.405717	1.47449	0.893528	protective	NA
PID_MYC_PATHWAY	REACTOME_L1CAM_INTERACTIONS	rs4466998	14	65008822	MAX	rs11071896	15	66528912	MAP2K1	dominant	0.324473	0.347543	1.47353	0.901739	protective	NA
PID_MYC_PATHWAY	REACTOME_L1CAM_INTERACTIONS	rs4977749	9	21927328	CDKN2A	rs2229866	1	205061988	CNTN2/NFASC	dominant	0.183551	0.203109	1.46737	0.882055	protective	NA
PID_MYC_PATHWAY	REACTOME_L1CAM_INTERACTIONS	rs1122326	17	42122855	KAT2A	rs1805007	16	89919709	TUBB3	dominant	0.0443831	0.0554162	1.46665	0.791658	protective	NA
PID_MYC_PATHWAY	REACTOME_L1CAM_INTERACTIONS	rs2303100	19	9857758	PIN1	rs11604757	11	1029320	AP2A2	dominant	0.14995	0.168255	1.46626	0.872016	protective	NA
PID_MYC_PATHWAY	REACTOME_L1CAM_INTERACTIONS	rs3765148	19	48944456	RUVBL2	rs805262	6	31660956	CSNK2B	dominant	0.0827482	0.0962889	1.46368	0.846689	protective	NA
PID_MYC_PATHWAY	REACTOME_L1CAM_INTERACTIONS	rs3765148	19	48944456	RUVBL2	rs723077	11	113323446	NCAM1	dominant	0.0855065	0.0990471	1.46284	0.850509	protective	NA
PID_MYC_PATHWAY	REACTOME_L1CAM_INTERACTIONS	rs3799977	6	44869619	SUPT3H	rs10956647	8	132190597	KCNQ3	dominant	0.323721	0.345286	1.45938	0.90765	protective	NA
PID_MYC_PATHWAY	REACTOME_L1CAM_INTERACTIONS	rs4977749	9	21927328	CDKN2A	rs2276635	2	219222719	TUBA4A/TUBA4B	dominant	0.0549147	0.0682046	1.45776	0.793825	protective	NA
PID_MYC_PATHWAY	REACTOME_L1CAM_INTERACTIONS	rs2303100	19	9857758	PIN1	rs12357206	10	60030625	ANK3	dominant	0.508526	0.531595	1.45488	0.911702	protective	NA
PID_MYC_PATHWAY	REACTOME_L1CAM_INTERACTIONS	rs1185246	5	69419483	TAF9	rs10510181	3	149364	CHL1	dominant	0.394684	0.419759	1.45263	0.901312	protective	NA
PID_MYC_PATHWAY	REACTOME_L1CAM_INTERACTIONS	rs9472414	6	44978769	SUPT3H	rs20559	1	183130425	LAMC1	dominant	0.0343531	0.0456369	1.45192	0.743951	protective	NA
PID_MYC_PATHWAY	REACTOME_L1CAM_INTERACTIONS	rs3799977	6	44869619	SUPT3H	rs11599164	10	60072226	ANK3	dominant	0.125376	0.141174	1.44452	0.872059	protective	NA
PID_MYC_PATHWAY	REACTOME_L1CAM_INTERACTIONS	rs4758443	11	6627193	TAF10	rs6598858	1	26583274	RPS6KA1	dominant	0.420261	0.442578	1.44318	0.913021	protective	NA
PID_MYC_PATHWAY	REACTOME_L1CAM_INTERACTIONS	rs4758443	11	6627193	TAF10	rs3759786	15	66337065	MAP2K1	dominant	0.15321	0.171013	1.43528	0.877059	protective	NA
PID_MYC_PATHWAY	REACTOME_L1CAM_INTERACTIONS	rs9642880	8	127705823	MYC	rs1201689	15	41813720	SPTBN5	dominant	0.419759	0.443831	1.43423	0.906526	protective	NA
PID_MYC_PATHWAY	REACTOME_L1CAM_INTERACTIONS	rs2303100	19	9857758	PIN1	rs71377306	17	47347921	ITGB3	dominant	0.0672016	0.0814945	1.43243	0.81198	protective	NA
PID_MYC_PATHWAY	REACTOME_L1CAM_INTERACTIONS	rs2303100	19	9857758	PIN1	rs10956647	8	132190597	KCNQ3	dominant	0.352056	0.374373	1.43171	0.907999	protective	NA
PID_MYC_PATHWAY	REACTOME_L1CAM_INTERACTIONS	rs4758443	11	6627193	TAF10	rs751024	1	22817501	EPHB2	dominant	0.203862	0.22317	1.43018	0.891329	protective	NA
PID_MYC_PATHWAY	REACTOME_L1CAM_INTERACTIONS	rs7189020	16	254804	AXIN1	rs41273499	1	158562824	SPTA1	dominant	0.085005	0.0992979	1.42691	0.842688	protective	NA
PID_MYC_PATHWAY	REACTOME_L1CAM_INTERACTIONS	rs4758443	11	6627193	TAF10	rs41273499	1	158562824	SPTA1	dominant	0.0827482	0.0972919	1.42685	0.83703	protective	NA
PID_MYC_PATHWAY	REACTOME_L1CAM_INTERACTIONS	rs3799977	6	44869619	SUPT3H	rs723077	11	113323446	NCAM1	dominant	0.491224	0.512788	1.42541	0.917343	protective	NA
PID_MYC_PATHWAY	REACTOME_L1CAM_INTERACTIONS	rs2303100	19	9857758	PIN1	rs6066384	20	37443196	SRC	dominant	0.486961	0.509779	1.41934	0.912752	protective	NA
PID_MYC_PATHWAY	REACTOME_L1CAM_INTERACTIONS	rs3799977	6	44869619	SUPT3H	rs11009235	10	33132620	NRP1	dominant	0.336259	0.357573	1.4183	0.910195	protective	NA
PID_MYC_PATHWAY	REACTOME_L1CAM_INTERACTIONS	rs4977749	9	21927328	CDKN2A	rs34083785	8	132513765	KCNQ3	dominant	0.185306	0.204614	1.41568	0.884174	protective	NA
PID_MYC_PATHWAY	REACTOME_L1CAM_INTERACTIONS	rs400037	16	286396	AXIN1	rs2228479	16	89919532	TUBB3	dominant	0.0491474	0.0601805	1.41363	0.807191	protective	NA
PID_MYC_PATHWAY	REACTOME_L1CAM_INTERACTIONS	rs3194151	16	370140	AXIN1	rs16915157	10	60586880	ANK3	dominant	0.104564	0.119609	1.41135	0.859525	protective	NA
PID_MYC_PATHWAY	REACTOME_L1CAM_INTERACTIONS	rs4977749	9	21927328	CDKN2A	rs12019224	3	37473850	ITGA9	dominant	0.195587	0.215145	1.41116	0.886987	protective	NA
PID_MYC_PATHWAY	REACTOME_L1CAM_INTERACTIONS	rs9642880	8	127705823	MYC	rs11071896	15	66528912	MAP2K1	dominant	0.317452	0.34002	1.41099	0.902759	protective	NA
PID_MYC_PATHWAY	REACTOME_L1CAM_INTERACTIONS	rs400037	16	286396	AXIN1	rs11604757	11	1029320	AP2A2	dominant	0.0729689	0.087011	1.40662	0.825914	protective	NA
PID_MYC_PATHWAY	REACTOME_L1CAM_INTERACTIONS	rs743580	15	74035775	PML	rs694739	11	64329761	RPS6KA4	dominant	0.431545	0.46013	1.40564	0.890712	protective	NA
PID_MYC_PATHWAY	REACTOME_L1CAM_INTERACTIONS	rs739999	16	269512	AXIN1	rs11604757	11	1029320	AP2A2	dominant	0.0386158	0.0498997	1.40237	0.764786	protective	NA
PID_MYC_PATHWAY	REACTOME_L1CAM_INTERACTIONS	rs4758443	11	6627193	TAF10	rs7911953	10	60031281	ANK3	dominant	0.0892678	0.104062	1.40129	0.843896	protective	NA
PID_MYC_PATHWAY	REACTOME_L1CAM_INTERACTIONS	rs3194151	16	370140	AXIN1	rs3827496	3	115622053	GAP43	dominant	0.225426	0.243982	1.39665	0.901813	protective	NA
PID_MYC_PATHWAY	REACTOME_L1CAM_INTERACTIONS	rs848210	1	15933318	ZBTB17	rs62107586	19	6468320	TUBB4A	dominant	0.429288	0.451354	1.39542	0.914337	protective	NA
PID_MYC_PATHWAY	REACTOME_L1CAM_INTERACTIONS	rs2303100	19	9857758	PIN1	rs751024	1	22817501	EPHB2	dominant	0.238465	0.258776	1.39395	0.896934	protective	NA
PID_MYC_PATHWAY	REACTOME_L1CAM_INTERACTIONS	rs9642880	8	127705823	MYC	rs10810812	9	17586103	SH3GL2	dominant	0.435557	0.461384	1.38877	0.900826	protective	NA
PID_MYC_PATHWAY	REACTOME_L1CAM_INTERACTIONS	rs3765148	19	48944456	RUVBL2	rs7616103	3	105586965	ALCAM	dominant	0.0774824	0.0905216	1.3863	0.843857	protective	NA
PID_MYC_PATHWAY	REACTOME_L1CAM_INTERACTIONS	rs9642880	8	127705823	MYC	rs1978973	3	105622370	ALCAM	dominant	0.102056	0.117854	1.38203	0.850723	protective	NA
PID_MYC_PATHWAY	REACTOME_L1CAM_INTERACTIONS	rs2303100	19	9857758	PIN1	rs314253	17	7188331	DLG4	dominant	0.380391	0.402457	1.36985	0.911511	protective	NA
PID_MYC_PATHWAY	REACTOME_L1CAM_INTERACTIONS	rs2303100	19	9857758	PIN1	rs2227983	7	55161562	EGFR	dominant	0.310431	0.331745	1.36496	0.906829	protective	NA
PID_MYC_PATHWAY	REACTOME_L1CAM_INTERACTIONS	rs3194151	16	370140	AXIN1	rs6066384	20	37443196	SRC	dominant	0.210381	0.228435	1.36491	0.899909	protective	NA
PID_MYC_PATHWAY	REACTOME_L1CAM_INTERACTIONS	rs3799977	6	44869619	SUPT3H	rs177389	14	73260801	NUMB	dominant	0.470662	0.491976	1.36442	0.918156	protective	NA
PID_MYC_PATHWAY	REACTOME_L1CAM_INTERACTIONS	rs1185246	5	69419483	TAF9	rs10810812	9	17586103	SH3GL2	dominant	0.456871	0.482698	1.36332	0.901485	protective	NA
PID_MYC_PATHWAY	REACTOME_L1CAM_INTERACTIONS	rs3799977	6	44869619	SUPT3H	rs2776937	10	33317261	NRP1	dominant	0.27984	0.2999	1.3631	0.907118	protective	NA
PID_MYC_PATHWAY	REACTOME_L1CAM_INTERACTIONS	rs4758443	11	6627193	TAF10	rs1011731	1	172377408	DNM3	dominant	0.399198	0.420762	1.36204	0.914695	protective	NA
PID_MYC_PATHWAY	REACTOME_L1CAM_INTERACTIONS	rs2166799	3	196820667	PAK2	rs3816533	15	41841899	SPTBN5	dominant	0.182798	0.201103	1.36131	0.888617	protective	NA
PID_MYC_PATHWAY	REACTOME_L1CAM_INTERACTIONS	rs3194151	16	370140	AXIN1	rs11671653	19	10727810	DNM2	dominant	0.0421264	0.0529087	1.35702	0.787246	protective	NA
PID_MYC_PATHWAY	REACTOME_L1CAM_INTERACTIONS	rs3194151	16	370140	AXIN1	rs2507941	3	37494565	ITGA9	dominant	0.0258275	0.0348546	1.35646	0.734141	protective	NA
PID_MYC_PATHWAY	REACTOME_L1CAM_INTERACTIONS	rs4977749	9	21927328	CDKN2A	rs41273499	1	158562824	SPTA1	dominant	0.0423771	0.0541625	1.35211	0.772778	protective	NA
PID_MYC_PATHWAY	REACTOME_L1CAM_INTERACTIONS	rs2084385	3	196826996	PAK2	rs1805007	16	89919709	TUBB3	dominant	0.0268305	0.0348546	1.35194	0.763437	protective	NA
PID_MYC_PATHWAY	REACTOME_L1CAM_INTERACTIONS	rs7189020	16	254804	AXIN1	rs2283125	9	133727220	VAV2	dominant	0.322969	0.344032	1.35175	0.909569	protective	NA
PID_MYC_PATHWAY	REACTOME_L1CAM_INTERACTIONS	rs3194151	16	370140	AXIN1	rs4916245	1	172236886	DNM3	dominant	0.212136	0.230191	1.34999	0.900451	protective	NA
PID_MYC_PATHWAY	REACTOME_L1CAM_INTERACTIONS	rs400037	16	286396	AXIN1	rs314253	17	7188331	DLG4	dominant	0.183801	0.201103	1.34581	0.894591	protective	NA
PID_MYC_PATHWAY	REACTOME_L1CAM_INTERACTIONS	rs3799977	6	44869619	SUPT3H	rs2281053	6	166447508	RPS6KA2	dominant	0.0609328	0.0727182	1.34009	0.827415	protective	NA
PID_MYC_PATHWAY	REACTOME_L1CAM_INTERACTIONS	rs1122326	17	42122855	KAT2A	rs34282046	19	19194090	NCAN	dominant	0.0386158	0.0483952	1.33921	0.789811	protective	NA
PID_MYC_PATHWAY	REACTOME_L1CAM_INTERACTIONS	rs2166799	3	196820667	PAK2	rs28568406	1	158717373	SPTA1	dominant	0.438064	0.46339	1.33903	0.90274	protective	NA
PID_MYC_PATHWAY	REACTOME_L1CAM_INTERACTIONS	rs743580	15	74035775	PML	rs28568406	1	158717373	SPTA1	dominant	0.443079	0.468405	1.33266	0.902915	protective	NA
PID_MYC_PATHWAY	REACTOME_L1CAM_INTERACTIONS	rs739999	16	269512	AXIN1	rs10956647	8	132190597	KCNQ3	dominant	0.0917753	0.106319	1.33097	0.849385	protective	NA
PID_MYC_PATHWAY	REACTOME_L1CAM_INTERACTIONS	rs3799977	6	44869619	SUPT3H	rs10510181	3	149364	CHL1	dominant	0.355316	0.378134	1.32477	0.906396	protective	NA
PID_MYC_PATHWAY	REACTOME_L1CAM_INTERACTIONS	rs7189020	16	254804	AXIN1	rs1201689	15	41813720	SPTBN5	dominant	0.388164	0.411234	1.32141	0.908313	protective	NA
PID_MYC_PATHWAY	REACTOME_L1CAM_INTERACTIONS	rs2303100	19	9857758	PIN1	rs62244081	3	38771518	SCN10A	dominant	0.301655	0.322467	1.31525	0.90758	protective	NA
PID_MYC_PATHWAY	REACTOME_L1CAM_INTERACTIONS	rs2303100	19	9857758	PIN1	rs62587579	9	137216103	TUBB4B	dominant	0.0636911	0.0769809	1.31487	0.815618	protective	NA
PID_MYC_PATHWAY	REACTOME_L1CAM_INTERACTIONS	rs7189020	16	254804	AXIN1	rs10510181	3	149364	CHL1	dominant	0.339519	0.362086	1.31348	0.905634	protective	NA
PID_MYC_PATHWAY	REACTOME_L1CAM_INTERACTIONS	rs4977749	9	21927328	CDKN2A	rs229587	14	64796582	SPTB	dominant	0.188816	0.207623	1.31331	0.888336	protective	NA
PID_MYC_PATHWAY	REACTOME_L1CAM_INTERACTIONS	rs4758443	11	6627193	TAF10	rs34789048	9	36169726	CLTA	dominant	0.0930291	0.107573	1.31092	0.850934	protective	NA
PID_MYC_PATHWAY	REACTOME_L1CAM_INTERACTIONS	rs4758443	11	6627193	TAF10	rs12344583	9	133858398	VAV2	dominant	0.207623	0.226179	1.30887	0.896464	protective	NA
PID_MYC_PATHWAY	REACTOME_L1CAM_INTERACTIONS	rs6776064	3	196708663	PAK2	rs3018474	11	77504355	PAK1	dominant	0.357823	0.378636	1.30438	0.914405	protective	NA
PID_MYC_PATHWAY	REACTOME_L1CAM_INTERACTIONS	rs4758443	11	6627193	TAF10	rs12205572	6	166365976	RPS6KA2	dominant	0.0641926	0.0769809	1.30036	0.822481	protective	NA
PID_MYC_PATHWAY	REACTOME_L1CAM_INTERACTIONS	rs848210	1	15933318	ZBTB17	rs741842	14	73251012	NUMB	dominant	0.143932	0.161234	1.30011	0.874648	protective	NA
PID_MYC_PATHWAY	REACTOME_L1CAM_INTERACTIONS	rs848210	1	15933318	ZBTB17	rs584427	11	113233274	NCAM1	dominant	0.474423	0.49674	1.29871	0.914519	protective	NA
PID_MYC_PATHWAY	REACTOME_L1CAM_INTERACTIONS	rs400037	16	286396	AXIN1	rs12357206	10	60030625	ANK3	dominant	0.246991	0.264544	1.29165	0.911886	protective	NA
PID_MYC_PATHWAY	REACTOME_L1CAM_INTERACTIONS	rs2303100	19	9857758	PIN1	rs11888208	2	166456941	SCN7A	dominant	0.194333	0.212889	1.28844	0.891815	protective	NA
PID_MYC_PATHWAY	REACTOME_L1CAM_INTERACTIONS	rs7189020	16	254804	AXIN1	rs16951095	18	7042912	LAMA1	dominant	0.0709629	0.0842528	1.2803	0.830213	protective	NA
PID_MYC_PATHWAY	REACTOME_L1CAM_INTERACTIONS	rs2084385	3	196826996	PAK2	rs3816533	15	41841899	SPTBN5	dominant	0.0594283	0.0714644	1.28029	0.820938	protective	NA
PID_MYC_PATHWAY	REACTOME_L1CAM_INTERACTIONS	rs4758443	11	6627193	TAF10	rs28568406	1	158717373	SPTA1	dominant	0.369358	0.393681	1.2802	0.902031	protective	NA
PID_MYC_PATHWAY	REACTOME_L1CAM_INTERACTIONS	rs2303100	19	9857758	PIN1	rs2403730	8	132079891	KCNQ3	dominant	0.378385	0.399699	1.27828	0.914215	protective	NA
PID_MYC_PATHWAY	REACTOME_L1CAM_INTERACTIONS	rs3799977	6	44869619	SUPT3H	rs17346452	1	172084147	DNM3	dominant	0.314694	0.333751	1.27761	0.91668	protective	NA
PID_MYC_PATHWAY	REACTOME_L1CAM_INTERACTIONS	rs3799977	6	44869619	SUPT3H	rs6764363	3	270666	CHL1	dominant	0.397442	0.417753	1.27446	0.919312	protective	NA
PID_MYC_PATHWAY	REACTOME_L1CAM_INTERACTIONS	rs2303100	19	9857758	PIN1	rs2298771	2	166036278	SCN1A	dominant	0.385657	0.406971	1.27201	0.914751	protective	NA
PID_MYC_PATHWAY	REACTOME_L1CAM_INTERACTIONS	rs4977749	9	21927328	CDKN2A	rs28407527	9	137233633	TUBB4B	dominant	0.219408	0.239218	1.27196	0.893915	protective	NA
PID_MYC_PATHWAY	REACTOME_L1CAM_INTERACTIONS	rs848210	1	15933318	ZBTB17	rs2721876	8	132515828	KCNQ3	dominant	0.347543	0.371113	1.27102	0.902655	protective	NA
PID_MYC_PATHWAY	REACTOME_L1CAM_INTERACTIONS	rs2303100	19	9857758	PIN1	rs8106478	19	46873129	AP2S1	dominant	0.443581	0.465145	1.2697	0.916679	protective	NA
PID_MYC_PATHWAY	REACTOME_L1CAM_INTERACTIONS	rs4758443	11	6627193	TAF10	rs267561	3	37533460	ITGA9	dominant	0.40346	0.424273	1.26837	0.917768	protective	NA
PID_MYC_PATHWAY	REACTOME_L1CAM_INTERACTIONS	rs4466998	14	65008822	MAX	rs20559	1	183130425	LAMC1	dominant	0.0694584	0.081996	1.26186	0.835682	protective	NA
PID_MYC_PATHWAY	REACTOME_L1CAM_INTERACTIONS	rs4977749	9	21927328	CDKN2A	rs2303361	7	6409865	RAC1	dominant	0.115848	0.131896	1.26154	0.862385	protective	NA
PID_MYC_PATHWAY	REACTOME_L1CAM_INTERACTIONS	rs2303100	19	9857758	PIN1	rs10893053	11	123610273	SCN3B	dominant	0.368606	0.389669	1.25636	0.914389	protective	NA
PID_MYC_PATHWAY	REACTOME_L1CAM_INTERACTIONS	rs4758443	11	6627193	TAF10	rs12357206	10	60030625	ANK3	dominant	0.442578	0.46339	1.25425	0.919427	protective	NA
PID_MYC_PATHWAY	REACTOME_L1CAM_INTERACTIONS	rs4758443	11	6627193	TAF10	rs10956647	8	132190597	KCNQ3	dominant	0.300401	0.320211	1.25353	0.911573	protective	NA
PID_MYC_PATHWAY	REACTOME_L1CAM_INTERACTIONS	rs7189020	16	254804	AXIN1	rs314253	17	7188331	DLG4	dominant	0.342277	0.363591	1.25262	0.910873	protective	NA
PID_MYC_PATHWAY	REACTOME_L1CAM_INTERACTIONS	rs3799977	6	44869619	SUPT3H	rs607230	18	6980524	LAMA1	dominant	0.317954	0.337763	1.25093	0.91401	protective	NA
PID_MYC_PATHWAY	REACTOME_L1CAM_INTERACTIONS	rs3799977	6	44869619	SUPT3H	rs2300014	7	108297798	NRCAM	dominant	0.450602	0.47016	1.24603	0.924281	protective	NA
PID_MYC_PATHWAY	REACTOME_L1CAM_INTERACTIONS	rs848210	1	15933318	ZBTB17	rs805262	6	31660956	CSNK2B	dominant	0.479188	0.500251	1.23966	0.919155	protective	NA
PID_MYC_PATHWAY	REACTOME_L1CAM_INTERACTIONS	rs4977749	9	21927328	CDKN2A	rs197770	3	37474336	ITGA9	dominant	0.087011	0.101555	1.23857	0.843142	protective	NA
PID_MYC_PATHWAY	REACTOME_L1CAM_INTERACTIONS	rs4977749	9	21927328	CDKN2A	rs1978973	3	105622370	ALCAM	dominant	0.0496489	0.0616851	1.23684	0.794684	protective	NA
PID_MYC_PATHWAY	REACTOME_L1CAM_INTERACTIONS	rs3194151	16	370140	AXIN1	rs280371	12	41114842	CNTN1	dominant	0.050652	0.0616851	1.23628	0.811595	protective	NA
PID_MYC_PATHWAY	REACTOME_L1CAM_INTERACTIONS	rs4977749	9	21927328	CDKN2A	rs2403730	8	132079891	KCNQ3	dominant	0.177783	0.195838	1.23549	0.887877	protective	NA
PID_MYC_PATHWAY	REACTOME_L1CAM_INTERACTIONS	rs4758443	11	6627193	TAF10	rs9347144	6	166665623	RPS6KA2	dominant	0.384403	0.407974	1.23178	0.906148	protective	NA
PID_MYC_PATHWAY	REACTOME_L1CAM_INTERACTIONS	rs3799977	6	44869619	SUPT3H	rs2403730	8	132079891	KCNQ3	dominant	0.355567	0.374624	1.23043	0.921062	protective	NA
PID_MYC_PATHWAY	REACTOME_L1CAM_INTERACTIONS	rs3765148	19	48944456	RUVBL2	rs6952125	7	6330563	RAC1	dominant	0.0812437	0.0930291	1.22802	0.862113	protective	NA
PID_MYC_PATHWAY	REACTOME_L1CAM_INTERACTIONS	rs4466998	14	65008822	MAX	rs9853984	3	38608689	SCN5A	dominant	0.460883	0.4832	1.22784	0.914331	protective	NA
PID_MYC_PATHWAY	REACTOME_L1CAM_INTERACTIONS	rs848210	1	15933318	ZBTB17	rs34162626	6	13611846	RANBP9	dominant	0.0707121	0.0817452	1.2231	0.85476	protective	NA
PID_MYC_PATHWAY	REACTOME_L1CAM_INTERACTIONS	rs11040923	11	6563777	TAF10	rs20559	1	183130425	LAMC1	dominant	0.0719659	0.0845035	1.2216	0.840127	protective	NA
PID_MYC_PATHWAY	REACTOME_L1CAM_INTERACTIONS	rs2303100	19	9857758	PIN1	rs41273499	1	158562824	SPTA1	dominant	0.0975426	0.112337	1.22121	0.854069	protective	NA
PID_MYC_PATHWAY	REACTOME_L1CAM_INTERACTIONS	rs400037	16	286396	AXIN1	rs17519184	18	6986715	LAMA1	dominant	0.199348	0.215396	1.21592	0.906944	protective	NA
PID_MYC_PATHWAY	REACTOME_L1CAM_INTERACTIONS	rs4977749	9	21927328	CDKN2A	rs240049	22	21906236	MAPK1	dominant	0.244734	0.265045	1.21397	0.898536	protective	NA
PID_MYC_PATHWAY	REACTOME_L1CAM_INTERACTIONS	rs4466998	14	65008822	MAX	rs10956647	8	132190597	KCNQ3	dominant	0.354564	0.374875	1.21362	0.916056	protective	NA
PID_MYC_PATHWAY	REACTOME_L1CAM_INTERACTIONS	rs3765148	19	48944456	RUVBL2	rs2804918	6	13584351	RANBP9	dominant	0.0689569	0.0817452	1.21153	0.831972	protective	NA
PID_MYC_PATHWAY	REACTOME_L1CAM_INTERACTIONS	rs4466998	14	65008822	MAX	rs71377306	17	47347921	ITGB3	dominant	0.0656971	0.0792377	1.20875	0.817098	protective	NA
PID_MYC_PATHWAY	REACTOME_L1CAM_INTERACTIONS	rs2303100	19	9857758	PIN1	rs9853984	3	38608689	SCN5A	dominant	0.455617	0.47668	1.20443	0.918831	protective	NA
PID_MYC_PATHWAY	REACTOME_L1CAM_INTERACTIONS	rs2303100	19	9857758	PIN1	rs1380453	10	60274597	ANK3	dominant	0.508024	0.529087	1.2015	0.919081	protective	NA
PID_MYC_PATHWAY	REACTOME_L1CAM_INTERACTIONS	rs9642880	8	127705823	MYC	rs34789048	9	36169726	CLTA	dominant	0.104814	0.119358	1.19589	0.863884	protective	NA
PID_MYC_PATHWAY	REACTOME_L1CAM_INTERACTIONS	rs2303100	19	9857758	PIN1	rs3922844	3	38582762	SCN5A	dominant	0.369107	0.389669	1.19367	0.916361	protective	NA
PID_MYC_PATHWAY	REACTOME_L1CAM_INTERACTIONS	rs3765148	19	48944456	RUVBL2	rs9347144	6	166665623	RPS6KA2	dominant	0.0732197	0.0847543	1.19296	0.853153	protective	NA
PID_MYC_PATHWAY	REACTOME_L1CAM_INTERACTIONS	rs3765148	19	48944456	RUVBL2	rs17346452	1	172084147	DNM3	dominant	0.0521565	0.0624373	1.19221	0.826281	protective	NA
PID_MYC_PATHWAY	REACTOME_L1CAM_INTERACTIONS	rs3765148	19	48944456	RUVBL2	rs857725	1	158638145	SPTA1	dominant	0.0498997	0.0599298	1.19195	0.823846	protective	NA
PID_MYC_PATHWAY	REACTOME_L1CAM_INTERACTIONS	rs4758443	11	6627193	TAF10	rs723077	11	113323446	NCAM1	dominant	0.448847	0.469157	1.19168	0.921451	protective	NA
PID_MYC_PATHWAY	REACTOME_L1CAM_INTERACTIONS	rs848210	1	15933318	ZBTB17	rs6598858	1	26583274	RPS6KA1	dominant	0.45662	0.475677	1.19047	0.92627	protective	NA
PID_MYC_PATHWAY	REACTOME_L1CAM_INTERACTIONS	rs400037	16	286396	AXIN1	rs3922844	3	38582762	SCN5A	dominant	0.178285	0.193831	1.18854	0.902391	protective	NA
PID_MYC_PATHWAY	REACTOME_L1CAM_INTERACTIONS	rs743580	15	74035775	PML	rs11071896	15	66528912	MAP2K1	dominant	0.334504	0.355817	1.18665	0.90999	protective	NA
PID_MYC_PATHWAY	REACTOME_L1CAM_INTERACTIONS	rs3194151	16	370140	AXIN1	rs2721876	8	132515828	KCNQ3	dominant	0.154714	0.170261	1.18248	0.891976	protective	NA
PID_MYC_PATHWAY	REACTOME_L1CAM_INTERACTIONS	rs848210	1	15933318	ZBTB17	rs17346452	1	172084147	DNM3	dominant	0.312187	0.32999	1.17182	0.921561	protective	NA
PID_MYC_PATHWAY	REACTOME_L1CAM_INTERACTIONS	rs7189020	16	254804	AXIN1	rs2293079	2	219236065	TUBA4A/TUBA4B	dominant	0.150953	0.17001	1.17123	0.867976	protective	NA
PID_MYC_PATHWAY	REACTOME_L1CAM_INTERACTIONS	rs2303100	19	9857758	PIN1	rs6952125	7	6330563	RAC1	dominant	0.509027	0.52984	1.16988	0.919994	protective	NA
PID_MYC_PATHWAY	REACTOME_L1CAM_INTERACTIONS	rs2303100	19	9857758	PIN1	rs7616103	3	105586965	ALCAM	dominant	0.475426	0.496239	1.16982	0.920049	protective	NA
PID_MYC_PATHWAY	REACTOME_L1CAM_INTERACTIONS	rs848210	1	15933318	ZBTB17	rs3816533	15	41841899	SPTBN5	dominant	0.171013	0.187061	1.1681	0.896511	protective	NA
PID_MYC_PATHWAY	REACTOME_L1CAM_INTERACTIONS	rs7189020	16	254804	AXIN1	rs28568406	1	158717373	SPTA1	dominant	0.390672	0.414493	1.16476	0.905681	protective	NA
PID_MYC_PATHWAY	REACTOME_L1CAM_INTERACTIONS	rs4977749	9	21927328	CDKN2A	rs9853984	3	38608689	SCN5A	dominant	0.216399	0.234955	1.15853	0.899215	protective	NA
PID_MYC_PATHWAY	REACTOME_L1CAM_INTERACTIONS	rs400037	16	286396	AXIN1	rs2298771	2	166036278	SCN1A	dominant	0.182798	0.198847	1.15596	0.901241	protective	NA
PID_MYC_PATHWAY	REACTOME_L1CAM_INTERACTIONS	rs3194151	16	370140	AXIN1	rs34282046	19	19194090	NCAN	dominant	0.0290873	0.0378636	1.15358	0.761268	protective	NA
PID_MYC_PATHWAY	REACTOME_L1CAM_INTERACTIONS	rs739999	16	269512	AXIN1	rs2293079	2	219236065	TUBA4A/TUBA4B	dominant	0.0426279	0.0551655	1.15308	0.762608	protective	NA
PID_MYC_PATHWAY	REACTOME_L1CAM_INTERACTIONS	rs4758443	11	6627193	TAF10	rs1155741	3	37585621	ITGA9	dominant	0.355567	0.375125	1.15212	0.919093	protective	NA
PID_MYC_PATHWAY	REACTOME_L1CAM_INTERACTIONS	rs848210	1	15933318	ZBTB17	rs11979158	7	55091656	EGFR	dominant	0.175276	0.191324	1.15197	0.898294	protective	NA
PID_MYC_PATHWAY	REACTOME_L1CAM_INTERACTIONS	rs6776064	3	196708663	PAK2	rs59763899	11	1029135	AP2A2	dominant	0.052658	0.0631896	1.15134	0.824069	protective	NA
PID_MYC_PATHWAY	REACTOME_L1CAM_INTERACTIONS	rs3194151	16	370140	AXIN1	rs12357206	10	60030625	ANK3	dominant	0.223671	0.240471	1.14947	0.910007	protective	NA
PID_MYC_PATHWAY	REACTOME_L1CAM_INTERACTIONS	rs4977749	9	21927328	CDKN2A	rs2261033	6	31635814	CSNK2B	dominant	0.243731	0.262788	1.14929	0.904109	protective	NA
PID_MYC_PATHWAY	REACTOME_L1CAM_INTERACTIONS	rs35599968	11	6623196	TAF10	rs3759786	15	66337065	MAP2K1	dominant	0.0333501	0.0416249	1.14802	0.794346	protective	NA
PID_MYC_PATHWAY	REACTOME_L1CAM_INTERACTIONS	rs848210	1	15933318	ZBTB17	rs694739	11	64329761	RPS6KA4	dominant	0.385406	0.411986	1.14797	0.895026	protective	NA
PID_MYC_PATHWAY	REACTOME_L1CAM_INTERACTIONS	rs2084385	3	196826996	PAK2	rs8106478	19	46873129	AP2S1	dominant	0.142929	0.157472	1.14785	0.892242	protective	NA
PID_MYC_PATHWAY	REACTOME_L1CAM_INTERACTIONS	rs6776064	3	196708663	PAK2	rs34789048	9	36169726	CLTA	dominant	0.0822467	0.0955366	1.14739	0.848426	protective	NA
PID_MYC_PATHWAY	REACTOME_L1CAM_INTERACTIONS	rs4758443	11	6627193	TAF10	rs3739609	9	36169601	CLTA	dominant	0.402959	0.422768	1.14688	0.921519	protective	NA
PID_MYC_PATHWAY	REACTOME_L1CAM_INTERACTIONS	rs3799977	6	44869619	SUPT3H	rs751024	1	22817501	EPHB2	dominant	0.225426	0.241976	1.14614	0.911701	protective	NA
PID_MYC_PATHWAY	REACTOME_L1CAM_INTERACTIONS	rs753307	19	49015227	RUVBL2	rs62244081	3	38771518	SCN10A	dominant	0.322718	0.342778	1.1461	0.913592	protective	NA
PID_MYC_PATHWAY	REACTOME_L1CAM_INTERACTIONS	rs11040923	11	6563777	TAF10	rs3816533	15	41841899	SPTBN5	dominant	0.18681	0.203109	1.14215	0.901318	protective	NA
PID_MYC_PATHWAY	REACTOME_L1CAM_INTERACTIONS	rs848210	1	15933318	ZBTB17	rs34282046	19	19194090	NCAN	dominant	0.0699599	0.0804915	1.13965	0.859317	protective	NA
PID_MYC_PATHWAY	REACTOME_L1CAM_INTERACTIONS	rs3765148	19	48944456	RUVBL2	rs1201689	15	41813720	SPTBN5	dominant	0.0677031	0.0814945	1.13503	0.81848	protective	NA
PID_MYC_PATHWAY	REACTOME_L1CAM_INTERACTIONS	rs400037	16	286396	AXIN1	rs9267546	6	31705659	CSNK2B	dominant	0.055667	0.0659478	1.13207	0.834917	protective	NA
PID_MYC_PATHWAY	REACTOME_L1CAM_INTERACTIONS	rs3765148	19	48944456	RUVBL2	rs59038848	3	197336197	DLG1	dominant	0.0531595	0.0634403	1.12977	0.828846	protective	NA
PID_MYC_PATHWAY	REACTOME_L1CAM_INTERACTIONS	rs6776064	3	196708663	PAK2	rs1801106	5	53062927	ITGA2	dominant	0.0985456	0.111083	1.12727	0.874795	protective	NA
PID_MYC_PATHWAY	REACTOME_L1CAM_INTERACTIONS	rs2303100	19	9857758	PIN1	rs16851669	2	166149820	SCN1A/SCN9A	dominant	0.418004	0.438315	1.12685	0.92038	protective	NA
PID_MYC_PATHWAY	REACTOME_L1CAM_INTERACTIONS	rs1185246	5	69419483	TAF9	rs1978973	3	105622370	ALCAM	dominant	0.107071	0.122116	1.12653	0.862023	protective	NA
PID_MYC_PATHWAY	REACTOME_L1CAM_INTERACTIONS	rs400037	16	286396	AXIN1	rs7006290	8	41757620	ANK1	dominant	0.1833	0.198345	1.12641	0.907122	protective	NA
PID_MYC_PATHWAY	REACTOME_L1CAM_INTERACTIONS	rs2303100	19	9857758	PIN1	rs12939821	17	64001926	SCN4A	dominant	0.469157	0.490722	1.12337	0.917217	protective	NA
PID_MYC_PATHWAY	REACTOME_L1CAM_INTERACTIONS	rs3194151	16	370140	AXIN1	rs177389	14	73260801	NUMB	dominant	0.219157	0.235707	1.12275	0.910081	protective	NA
PID_MYC_PATHWAY	REACTOME_L1CAM_INTERACTIONS	rs4758443	11	6627193	TAF10	rs9841329	3	38646312	SCN5A	dominant	0.414243	0.434303	1.12159	0.921146	protective	NA
PID_MYC_PATHWAY	REACTOME_L1CAM_INTERACTIONS	rs3765148	19	48944456	RUVBL2	rs197770	3	37474336	ITGA9	dominant	0.0305918	0.0388666	1.1208	0.780378	protective	NA
PID_MYC_PATHWAY	REACTOME_L1CAM_INTERACTIONS	rs848210	1	15933318	ZBTB17	rs1805007	16	89919709	TUBB3	dominant	0.0767302	0.0875125	1.12068	0.866551	protective	NA
PID_MYC_PATHWAY	REACTOME_L1CAM_INTERACTIONS	rs3799977	6	44869619	SUPT3H	rs3827496	3	115622053	GAP43	dominant	0.487964	0.507773	1.1199	0.923809	protective	NA
PID_MYC_PATHWAY	REACTOME_L1CAM_INTERACTIONS	rs7189020	16	254804	AXIN1	rs34162626	6	13611846	RANBP9	dominant	0.0739719	0.0842528	1.11873	0.868229	protective	NA
PID_MYC_PATHWAY	REACTOME_L1CAM_INTERACTIONS	rs848210	1	15933318	ZBTB17	rs2276635	2	219222719	TUBA4A/TUBA4B	dominant	0.111836	0.124122	1.11527	0.888546	protective	NA
PID_MYC_PATHWAY	REACTOME_L1CAM_INTERACTIONS	rs3194151	16	370140	AXIN1	rs685870	11	64344456	RPS6KA4	dominant	0.153962	0.169007	1.10575	0.894779	protective	NA
PID_MYC_PATHWAY	REACTOME_L1CAM_INTERACTIONS	rs4977749	9	21927328	CDKN2A	rs3739609	9	36169601	CLTA	dominant	0.220411	0.238716	1.10153	0.90164	protective	NA
PID_MYC_PATHWAY	REACTOME_L1CAM_INTERACTIONS	rs3765148	19	48944456	RUVBL2	rs11129795	3	38547672	SCN5A	dominant	0.0441324	0.0534102	1.09641	0.818271	protective	NA
PID_MYC_PATHWAY	REACTOME_L1CAM_INTERACTIONS	rs6776064	3	196708663	PAK2	rs10956647	8	132190597	KCNQ3	dominant	0.266299	0.284353	1.09577	0.913463	protective	NA
PID_MYC_PATHWAY	REACTOME_L1CAM_INTERACTIONS	rs400037	16	286396	AXIN1	rs10510181	3	149364	CHL1	dominant	0.184303	0.202608	1.09415	0.88924	protective	NA
PID_MYC_PATHWAY	REACTOME_L1CAM_INTERACTIONS	rs4977749	9	21927328	CDKN2A	rs671871	18	6977845	LAMA1	dominant	0.106319	0.121113	1.09361	0.863315	protective	NA
PID_MYC_PATHWAY	REACTOME_L1CAM_INTERACTIONS	rs3799977	6	44869619	SUPT3H	rs10810812	9	17586103	SH3GL2	dominant	0.41324	0.437061	1.09318	0.907111	protective	NA
PID_MYC_PATHWAY	REACTOME_L1CAM_INTERACTIONS	rs9642880	8	127705823	MYC	rs2303361	7	6409865	RAC1	dominant	0.253761	0.270812	1.09303	0.915626	protective	NA
PID_MYC_PATHWAY	REACTOME_L1CAM_INTERACTIONS	rs4758443	11	6627193	TAF10	rs11009235	10	33132620	NRP1	dominant	0.304162	0.322718	1.09034	0.917369	protective	NA
PID_MYC_PATHWAY	REACTOME_L1CAM_INTERACTIONS	rs848210	1	15933318	ZBTB17	rs3018474	11	77504355	PAK1	dominant	0.433551	0.452357	1.08943	0.926605	protective	NA
PID_MYC_PATHWAY	REACTOME_L1CAM_INTERACTIONS	rs3799977	6	44869619	SUPT3H	rs2521988	17	7252542	DLG4	dominant	0.167503	0.182297	1.08883	0.902516	protective	NA
PID_MYC_PATHWAY	REACTOME_L1CAM_INTERACTIONS	rs6776064	3	196708663	PAK2	rs314253	17	7188331	DLG4	dominant	0.297141	0.314443	1.08774	0.921714	protective	NA
PID_MYC_PATHWAY	REACTOME_L1CAM_INTERACTIONS	rs4977749	9	21927328	CDKN2A	rs10956647	8	132190597	KCNQ3	dominant	0.172768	0.189819	1.08529	0.891411	protective	NA
PID_MYC_PATHWAY	REACTOME_L1CAM_INTERACTIONS	rs2166799	3	196820667	PAK2	rs62107586	19	6468320	TUBB4A	dominant	0.461133	0.480692	1.08505	0.924492	protective	NA
PID_MYC_PATHWAY	REACTOME_L1CAM_INTERACTIONS	rs3765148	19	48944456	RUVBL2	rs1805007	16	89919709	TUBB3	dominant	0.0127884	0.0188064	1.08441	0.675855	protective	NA
PID_MYC_PATHWAY	REACTOME_L1CAM_INTERACTIONS	rs4466998	14	65008822	MAX	rs2283125	9	133727220	VAV2	dominant	0.368857	0.388666	1.08351	0.919245	protective	NA
PID_MYC_PATHWAY	REACTOME_L1CAM_INTERACTIONS	rs9642880	8	127705823	MYC	rs2276635	2	219222719	TUBA4A/TUBA4B	dominant	0.114845	0.127633	1.08191	0.886804	protective	NA
PID_MYC_PATHWAY	REACTOME_L1CAM_INTERACTIONS	rs743580	15	74035775	PML	rs11888208	2	166456941	SCN7A	dominant	0.202357	0.224423	1.08067	0.876732	protective	NA
PID_MYC_PATHWAY	REACTOME_L1CAM_INTERACTIONS	rs3194151	16	370140	AXIN1	rs584427	11	113233274	NCAM1	dominant	0.222417	0.238716	1.07828	0.912193	protective	NA
PID_MYC_PATHWAY	REACTOME_L1CAM_INTERACTIONS	rs2303100	19	9857758	PIN1	rs29302	4	113303436	ANK2	dominant	0.475928	0.495988	1.07627	0.922826	protective	NA
PID_MYC_PATHWAY	REACTOME_L1CAM_INTERACTIONS	rs2166799	3	196820667	PAK2	rs2228479	16	89919532	TUBB3	dominant	0.108826	0.121615	1.07146	0.882004	protective	NA
PID_MYC_PATHWAY	REACTOME_L1CAM_INTERACTIONS	rs3194151	16	370140	AXIN1	rs3826408	17	7197973	DLG4	dominant	0.225426	0.242477	1.06467	0.909214	protective	NA
PID_MYC_PATHWAY	REACTOME_L1CAM_INTERACTIONS	rs3194151	16	370140	AXIN1	rs3018474	11	77504355	PAK1	dominant	0.200351	0.216399	1.06011	0.907259	protective	NA
PID_MYC_PATHWAY	REACTOME_L1CAM_INTERACTIONS	rs3194151	16	370140	AXIN1	rs2403730	8	132079891	KCNQ3	dominant	0.165747	0.180792	1.05757	0.900249	protective	NA
PID_MYC_PATHWAY	REACTOME_L1CAM_INTERACTIONS	rs753307	19	49015227	RUVBL2	rs9853984	3	38608689	SCN5A	dominant	0.47994	0.5	1.05645	0.922854	protective	NA
PID_MYC_PATHWAY	REACTOME_L1CAM_INTERACTIONS	rs3765148	19	48944456	RUVBL2	rs3827496	3	115622053	GAP43	dominant	0.0897693	0.101053	1.05269	0.877325	protective	NA
PID_MYC_PATHWAY	REACTOME_L1CAM_INTERACTIONS	rs2166799	3	196820667	PAK2	rs1978973	3	105622370	ALCAM	dominant	0.107823	0.122618	1.05097	0.864764	protective	NA
PID_MYC_PATHWAY	REACTOME_L1CAM_INTERACTIONS	rs4466998	14	65008822	MAX	rs34162626	6	13611846	RANBP9	dominant	0.0769809	0.0877633	1.0508	0.866896	protective	NA
PID_MYC_PATHWAY	REACTOME_L1CAM_INTERACTIONS	rs4466998	14	65008822	MAX	rs303819	12	51821318	SCN8A	dominant	0.179539	0.195085	1.04917	0.90287	protective	NA
PID_MYC_PATHWAY	REACTOME_L1CAM_INTERACTIONS	rs4466998	14	65008822	MAX	rs3759786	15	66337065	MAP2K1	dominant	0.183049	0.200853	1.04888	0.8915	protective	NA
PID_MYC_PATHWAY	REACTOME_L1CAM_INTERACTIONS	rs1185246	5	69419483	TAF9	rs3816533	15	41841899	SPTBN5	dominant	0.186309	0.20336	1.04777	0.896955	protective	NA
PID_MYC_PATHWAY	REACTOME_L1CAM_INTERACTIONS	rs2303100	19	9857758	PIN1	rs1978973	3	105622370	ALCAM	dominant	0.10331	0.117854	1.04179	0.862378	protective	NA
PID_MYC_PATHWAY	REACTOME_L1CAM_INTERACTIONS	rs3799977	6	44869619	SUPT3H	rs2283125	9	133727220	VAV2	dominant	0.337763	0.355567	1.04116	0.924392	protective	NA
PID_MYC_PATHWAY	REACTOME_L1CAM_INTERACTIONS	rs7189020	16	254804	AXIN1	rs7911953	10	60031281	ANK3	dominant	0.0980441	0.109829	1.03901	0.88103	protective	NA
PID_MYC_PATHWAY	REACTOME_L1CAM_INTERACTIONS	rs400037	16	286396	AXIN1	rs16851669	2	166149820	SCN1A/SCN9A	dominant	0.202608	0.218907	1.03616	0.906626	protective	NA
PID_MYC_PATHWAY	REACTOME_L1CAM_INTERACTIONS	rs848210	1	15933318	ZBTB17	rs1801475	20	63406924	KCNQ2	dominant	0.38014	0.398445	1.02966	0.925885	protective	NA
PID_MYC_PATHWAY	REACTOME_L1CAM_INTERACTIONS	rs4466998	14	65008822	MAX	rs2293079	2	219236065	TUBA4A/TUBA4B	dominant	0.171765	0.191073	1.02669	0.877994	protective	NA
PID_MYC_PATHWAY	REACTOME_L1CAM_INTERACTIONS	rs3765148	19	48944456	RUVBL2	rs2058194	17	63942988	SCN4A	dominant	0.0774824	0.0882648	1.01929	0.867581	protective	NA
PID_MYC_PATHWAY	REACTOME_L1CAM_INTERACTIONS	rs11040923	11	6563777	TAF10	rs10810812	9	17586103	SH3GL2	dominant	0.461635	0.485456	1.01798	0.908853	protective	NA
PID_MYC_PATHWAY	REACTOME_L1CAM_INTERACTIONS	rs3194151	16	370140	AXIN1	rs7831590	8	41689868	ANK1	dominant	0.0285858	0.0368606	1.01703	0.768904	protective	NA
PID_MYC_PATHWAY	REACTOME_L1CAM_INTERACTIONS	rs848210	1	15933318	ZBTB17	rs1011731	1	172377408	DNM3	dominant	0.438064	0.457623	1.01596	0.923942	protective	NA
PID_MYC_PATHWAY	REACTOME_L1CAM_INTERACTIONS	rs7189020	16	254804	AXIN1	rs34789048	9	36169726	CLTA	dominant	0.0932798	0.10657	1.01562	0.862465	protective	NA
PID_MYC_PATHWAY	REACTOME_L1CAM_INTERACTIONS	rs3799977	6	44869619	SUPT3H	rs2276635	2	219222719	TUBA4A/TUBA4B	dominant	0.118104	0.130893	1.014	0.889215	protective	NA
PID_MYC_PATHWAY	REACTOME_L1CAM_INTERACTIONS	rs2084385	3	196826996	PAK2	rs12019224	3	37473850	ITGA9	dominant	0.131645	0.145687	1.01327	0.889002	protective	NA
PID_MYC_PATHWAY	REACTOME_L1CAM_INTERACTIONS	rs739999	16	269512	AXIN1	rs3768781	2	186617108	ITGAV	dominant	0.077984	0.0902708	1.01261	0.852377	protective	NA
PID_MYC_PATHWAY	REACTOME_L1CAM_INTERACTIONS	rs3194151	16	370140	AXIN1	rs1531545	5	52897456	ITGA1	dominant	0.22668	0.242728	1.00988	0.914504	protective	NA
PID_MYC_PATHWAY	REACTOME_L1CAM_INTERACTIONS	rs2084385	3	196826996	PAK2	rs229587	14	64796582	SPTB	dominant	0.128636	0.141926	1.00853	0.892537	protective	NA
PID_MYC_PATHWAY	REACTOME_L1CAM_INTERACTIONS	rs2303100	19	9857758	PIN1	rs1155741	3	37585621	ITGA9	dominant	0.424273	0.443581	1.00077	0.924396	protective	NA
PID_MYC_PATHWAY	REACTOME_L1CAM_INTERACTIONS	rs753307	19	49015227	RUVBL2	rs2293079	2	219236065	TUBA4A/TUBA4B	dominant	0.180291	0.19985	1.00017	0.880608	protective	NA
PID_MYC_PATHWAY	REACTOME_L1CAM_INTERACTIONS	rs400037	16	286396	AXIN1	rs16915157	10	60586880	ANK3	dominant	0.113842	0.126128	0.999089	0.89007	protective	NA
PID_MYC_PATHWAY	REACTOME_L1CAM_INTERACTIONS	rs4977749	9	21927328	CDKN2A	rs11009235	10	33132620	NRP1	dominant	0.172768	0.189318	0.99788	0.894326	protective	NA
PID_MYC_PATHWAY	REACTOME_L1CAM_INTERACTIONS	rs2084385	3	196826996	PAK2	rs61759822	9	137252821	TUBB4B	dominant	0.0491474	0.0584253	0.996423	0.832994	protective	NA
PID_MYC_PATHWAY	REACTOME_L1CAM_INTERACTIONS	rs753307	19	49015227	RUVBL2	rs62107586	19	6468320	TUBB4A	dominant	0.478435	0.497242	0.990251	0.927485	protective	NA
PID_MYC_PATHWAY	REACTOME_L1CAM_INTERACTIONS	rs2166799	3	196820667	PAK2	rs10810812	9	17586103	SH3GL2	dominant	0.453611	0.477182	0.98844	0.909596	protective	NA
PID_MYC_PATHWAY	REACTOME_L1CAM_INTERACTIONS	rs4758443	11	6627193	TAF10	rs314253	17	7188331	DLG4	dominant	0.33676	0.354814	0.987544	0.923281	protective	NA
PID_MYC_PATHWAY	REACTOME_L1CAM_INTERACTIONS	rs3799977	6	44869619	SUPT3H	rs2228479	16	89919532	TUBB3	dominant	0.102307	0.114343	0.98585	0.88274	protective	NA
PID_MYC_PATHWAY	REACTOME_L1CAM_INTERACTIONS	rs3194151	16	370140	AXIN1	rs41273499	1	158562824	SPTA1	dominant	0.0436309	0.053661	0.983517	0.804557	protective	NA
PID_MYC_PATHWAY	REACTOME_L1CAM_INTERACTIONS	rs3765148	19	48944456	RUVBL2	rs10761482	10	60325579	ANK3	dominant	0.0393681	0.0478937	0.98343	0.814694	protective	NA
PID_MYC_PATHWAY	REACTOME_L1CAM_INTERACTIONS	rs4977749	9	21927328	CDKN2A	rs6699312	1	171836182	DNM3	dominant	0.242227	0.260281	0.982397	0.908463	protective	NA
PID_MYC_PATHWAY	REACTOME_L1CAM_INTERACTIONS	rs3194151	16	370140	AXIN1	rs2303361	7	6409865	RAC1	dominant	0.113591	0.12663	0.981238	0.883834	protective	NA
PID_MYC_PATHWAY	REACTOME_L1CAM_INTERACTIONS	rs3194151	16	370140	AXIN1	rs12939821	17	64001926	SCN4A	dominant	0.207874	0.223671	0.979148	0.910838	protective	NA
PID_MYC_PATHWAY	REACTOME_L1CAM_INTERACTIONS	rs4758443	11	6627193	TAF10	rs2058194	17	63942988	SCN4A	dominant	0.413992	0.432798	0.978576	0.925849	protective	NA
PID_MYC_PATHWAY	REACTOME_L1CAM_INTERACTIONS	rs3765148	19	48944456	RUVBL2	rs10893053	11	123610273	SCN3B	dominant	0.0604313	0.0702106	0.978452	0.851756	protective	NA
PID_MYC_PATHWAY	REACTOME_L1CAM_INTERACTIONS	rs848210	1	15933318	ZBTB17	rs10956647	8	132190597	KCNQ3	dominant	0.322718	0.340522	0.974942	0.922805	protective	NA
PID_MYC_PATHWAY	REACTOME_L1CAM_INTERACTIONS	rs3194151	16	370140	AXIN1	rs3739609	9	36169601	CLTA	dominant	0.203611	0.218907	0.974803	0.912261	protective	NA
PID_MYC_PATHWAY	REACTOME_L1CAM_INTERACTIONS	rs1185246	5	69419483	TAF9	rs34282046	19	19194090	NCAN	dominant	0.0732197	0.0862588	0.974182	0.836895	protective	NA
PID_MYC_PATHWAY	REACTOME_L1CAM_INTERACTIONS	rs4466998	14	65008822	MAX	rs10510181	3	149364	CHL1	dominant	0.388164	0.408977	0.973524	0.916826	protective	NA
PID_MYC_PATHWAY	REACTOME_L1CAM_INTERACTIONS	rs1122326	17	42122855	KAT2A	rs2293079	2	219236065	TUBA4A/TUBA4B	dominant	0.0935306	0.109077	0.971132	0.842765	protective	NA
PID_MYC_PATHWAY	REACTOME_L1CAM_INTERACTIONS	rs11040923	11	6563777	TAF10	rs11604757	11	1029320	AP2A2	dominant	0.156469	0.172016	0.970517	0.892856	protective	NA
PID_MYC_PATHWAY	REACTOME_L1CAM_INTERACTIONS	rs4977749	9	21927328	CDKN2A	rs9347144	6	166665623	RPS6KA2	dominant	0.210381	0.227683	0.968509	0.903762	protective	NA
PID_MYC_PATHWAY	REACTOME_L1CAM_INTERACTIONS	rs3765148	19	48944456	RUVBL2	rs1011731	1	172377408	DNM3	dominant	0.078987	0.0895186	0.964723	0.872263	protective	NA
PID_MYC_PATHWAY	REACTOME_L1CAM_INTERACTIONS	rs3194151	16	370140	AXIN1	rs59038848	3	197336197	DLG1	dominant	0.140923	0.154714	0.962184	0.896236	protective	NA
PID_MYC_PATHWAY	REACTOME_L1CAM_INTERACTIONS	rs7189020	16	254804	AXIN1	rs17519184	18	6986715	LAMA1	dominant	0.373119	0.393681	0.962116	0.916684	protective	NA
PID_MYC_PATHWAY	REACTOME_L1CAM_INTERACTIONS	rs753307	19	49015227	RUVBL2	rs11604757	11	1029320	AP2A2	dominant	0.157974	0.173521	0.961032	0.893595	protective	NA
PID_MYC_PATHWAY	REACTOME_L1CAM_INTERACTIONS	rs739999	16	269512	AXIN1	rs1201689	15	41813720	SPTBN5	dominant	0.11334	0.128636	0.959619	0.865892	protective	NA
PID_MYC_PATHWAY	REACTOME_L1CAM_INTERACTIONS	rs4977749	9	21927328	CDKN2A	rs177389	14	73260801	NUMB	dominant	0.236961	0.254764	0.957459	0.908416	protective	NA
PID_MYC_PATHWAY	REACTOME_L1CAM_INTERACTIONS	rs2303100	19	9857758	PIN1	rs2229866	1	205061988	CNTN2/NFASC	dominant	0.394433	0.41324	0.957348	0.924848	protective	NA
PID_MYC_PATHWAY	REACTOME_L1CAM_INTERACTIONS	rs7189020	16	254804	AXIN1	rs2521988	17	7252542	DLG4	dominant	0.158475	0.172518	0.955183	0.903276	protective	NA
PID_MYC_PATHWAY	REACTOME_L1CAM_INTERACTIONS	rs4758443	11	6627193	TAF10	rs1978973	3	105622370	ALCAM	dominant	0.0902708	0.103811	0.948501	0.856622	protective	NA
PID_MYC_PATHWAY	REACTOME_L1CAM_INTERACTIONS	rs3765148	19	48944456	RUVBL2	rs584427	11	113233274	NCAM1	dominant	0.0832497	0.0940321	0.948445	0.87492	protective	NA
PID_MYC_PATHWAY	REACTOME_L1CAM_INTERACTIONS	rs2303100	19	9857758	PIN1	rs20559	1	183130425	LAMC1	dominant	0.0687061	0.0807422	0.948054	0.839934	protective	NA
PID_MYC_PATHWAY	REACTOME_L1CAM_INTERACTIONS	rs4758443	11	6627193	TAF10	rs11888208	2	166456941	SCN7A	dominant	0.166249	0.181294	0.946539	0.900465	protective	NA
PID_MYC_PATHWAY	REACTOME_L1CAM_INTERACTIONS	rs2303100	19	9857758	PIN1	rs3826408	17	7197973	DLG4	dominant	0.511284	0.530341	0.946491	0.926473	protective	NA
PID_MYC_PATHWAY	REACTOME_L1CAM_INTERACTIONS	rs2084385	3	196826996	PAK2	rs13164431	5	52868086	ITGA1	dominant	0.152959	0.167001	0.942639	0.900732	protective	NA
PID_MYC_PATHWAY	REACTOME_L1CAM_INTERACTIONS	rs3194151	16	370140	AXIN1	rs34083785	8	132513765	KCNQ3	dominant	0.177031	0.191575	0.939857	0.907753	protective	NA
PID_MYC_PATHWAY	REACTOME_L1CAM_INTERACTIONS	rs2166799	3	196820667	PAK2	rs2403730	8	132079891	KCNQ3	dominant	0.380391	0.401454	0.939376	0.915322	protective	NA
PID_MYC_PATHWAY	REACTOME_L1CAM_INTERACTIONS	rs6776064	3	196708663	PAK2	rs1201689	15	41813720	SPTBN5	dominant	0.329238	0.349047	0.939129	0.91539	protective	NA
PID_MYC_PATHWAY	REACTOME_L1CAM_INTERACTIONS	rs1185246	5	69419483	TAF9	rs11979158	7	55091656	EGFR	dominant	0.193079	0.208375	0.931564	0.90903	protective	NA
PID_MYC_PATHWAY	REACTOME_L1CAM_INTERACTIONS	rs3765148	19	48944456	RUVBL2	rs3808755	9	17616195	SH3GL2	dominant	0.0689569	0.080993	0.927966	0.840387	protective	NA
PID_MYC_PATHWAY	REACTOME_L1CAM_INTERACTIONS	rs4977749	9	21927328	CDKN2A	rs29302	4	113303436	ANK2	dominant	0.221414	0.238716	0.927237	0.906909	protective	NA
PID_MYC_PATHWAY	REACTOME_L1CAM_INTERACTIONS	rs3765148	19	48944456	RUVBL2	rs7006290	8	41757620	ANK1	dominant	0.059679	0.0692076	0.926927	0.853581	protective	NA
PID_MYC_PATHWAY	REACTOME_L1CAM_INTERACTIONS	rs4977749	9	21927328	CDKN2A	rs6952125	7	6330563	RAC1	dominant	0.246239	0.264042	0.924812	0.910547	protective	NA
PID_MYC_PATHWAY	REACTOME_L1CAM_INTERACTIONS	rs753307	19	49015227	RUVBL2	rs41273499	1	158562824	SPTA1	dominant	0.102558	0.115597	0.91819	0.874311	protective	NA
PID_MYC_PATHWAY	REACTOME_L1CAM_INTERACTIONS	rs4758443	11	6627193	TAF10	rs20559	1	183130425	LAMC1	dominant	0.0591775	0.0699599	0.915662	0.836184	protective	NA
PID_MYC_PATHWAY	REACTOME_L1CAM_INTERACTIONS	rs4466998	14	65008822	MAX	rs41273499	1	158562824	SPTA1	dominant	0.102808	0.115848	0.915396	0.874548	protective	NA
PID_MYC_PATHWAY	REACTOME_L1CAM_INTERACTIONS	rs753307	19	49015227	RUVBL2	rs34789048	9	36169726	CLTA	dominant	0.114594	0.128385	0.911035	0.878675	protective	NA
PID_MYC_PATHWAY	REACTOME_L1CAM_INTERACTIONS	rs9472414	6	44978769	SUPT3H	rs34789048	9	36169726	CLTA	dominant	0.0589268	0.0699599	0.907334	0.832419	protective	NA
PID_MYC_PATHWAY	REACTOME_L1CAM_INTERACTIONS	rs400037	16	286396	AXIN1	rs34083785	8	132513765	KCNQ3	dominant	0.191073	0.207874	0.903504	0.90009	protective	NA
PID_MYC_PATHWAY	REACTOME_L1CAM_INTERACTIONS	rs2166799	3	196820667	PAK2	rs314253	17	7188331	DLG4	dominant	0.396439	0.415747	0.902785	0.923054	protective	NA
PID_MYC_PATHWAY	REACTOME_L1CAM_INTERACTIONS	rs739999	16	269512	AXIN1	rs73009507	19	10850348	DNM2	dominant	0.0230692	0.029338	0.898589	0.781279	protective	NA
PID_MYC_PATHWAY	REACTOME_L1CAM_INTERACTIONS	rs4977749	9	21927328	CDKN2A	rs850731	17	44376902	ITGA2B	dominant	0.227934	0.245236	0.897574	0.908619	protective	NA
PID_MYC_PATHWAY	REACTOME_L1CAM_INTERACTIONS	rs4977749	9	21927328	CDKN2A	rs11549015	15	41943118	SPTBN5	dominant	0.0942828	0.107573	0.894965	0.863596	protective	NA
PID_MYC_PATHWAY	REACTOME_L1CAM_INTERACTIONS	rs9642880	8	127705823	MYC	rs2300014	7	108297798	NRCAM	dominant	0.475928	0.494734	0.892498	0.927466	protective	NA
PID_MYC_PATHWAY	REACTOME_L1CAM_INTERACTIONS	rs753307	19	49015227	RUVBL2	rs11071896	15	66528912	MAP2K1	dominant	0.344534	0.364092	0.889143	0.918045	protective	NA
PID_MYC_PATHWAY	REACTOME_L1CAM_INTERACTIONS	rs6776064	3	196708663	PAK2	rs3816533	15	41841899	SPTBN5	dominant	0.138666	0.152207	0.88282	0.896716	protective	NA
PID_MYC_PATHWAY	REACTOME_L1CAM_INTERACTIONS	rs3194151	16	370140	AXIN1	rs671871	18	6977845	LAMA1	dominant	0.101555	0.113591	0.880671	0.882063	protective	NA
PID_MYC_PATHWAY	REACTOME_L1CAM_INTERACTIONS	rs2166799	3	196820667	PAK2	rs3759786	15	66337065	MAP2K1	dominant	0.18681	0.201856	0.866734	0.908343	protective	NA
PID_MYC_PATHWAY	REACTOME_L1CAM_INTERACTIONS	rs3765148	19	48944456	RUVBL2	rs11708996	3	38592432	SCN5A	dominant	0.0315948	0.0391174	0.866437	0.801418	protective	NA
PID_MYC_PATHWAY	REACTOME_L1CAM_INTERACTIONS	rs4977749	9	21927328	CDKN2A	rs11071896	15	66528912	MAP2K1	dominant	0.155216	0.171013	0.861443	0.890652	protective	NA
PID_MYC_PATHWAY	REACTOME_L1CAM_INTERACTIONS	rs4977749	9	21927328	CDKN2A	rs7565062	2	166477575	SCN7A	dominant	0.183801	0.19985	0.861373	0.901616	protective	NA
PID_MYC_PATHWAY	REACTOME_L1CAM_INTERACTIONS	rs739999	16	269512	AXIN1	rs17116710	5	155015898	KIF4B	dominant	0.055667	0.0651956	0.856943	0.845231	protective	NA
PID_MYC_PATHWAY	REACTOME_L1CAM_INTERACTIONS	rs3194151	16	370140	AXIN1	rs1499280	5	52801055	ITGA1	dominant	0.0478937	0.0571715	0.856934	0.829556	protective	NA
PID_MYC_PATHWAY	REACTOME_L1CAM_INTERACTIONS	rs3194151	16	370140	AXIN1	rs2521988	17	7252542	DLG4	dominant	0.0747242	0.0855065	0.856548	0.863717	protective	NA
PID_MYC_PATHWAY	REACTOME_L1CAM_INTERACTIONS	rs3799977	6	44869619	SUPT3H	rs11071896	15	66528912	MAP2K1	dominant	0.307924	0.32673	0.852991	0.916831	protective	NA
PID_MYC_PATHWAY	REACTOME_L1CAM_INTERACTIONS	rs6776064	3	196708663	PAK2	rs1011731	1	172377408	DNM3	dominant	0.355567	0.375627	0.849655	0.917129	protective	NA
PID_MYC_PATHWAY	REACTOME_L1CAM_INTERACTIONS	rs4977749	9	21927328	CDKN2A	rs746463	11	110125219	RDX	dominant	0.177031	0.192828	0.847614	0.900452	protective	NA
PID_MYC_PATHWAY	REACTOME_L1CAM_INTERACTIONS	rs3799977	6	44869619	SUPT3H	rs2977852	8	41631133	ANK1	dominant	0.46339	0.48997	0.846636	0.898907	protective	NA
PID_MYC_PATHWAY	REACTOME_L1CAM_INTERACTIONS	rs3194151	16	370140	AXIN1	rs12520591	5	52933915	ITGA1	dominant	0.029338	0.0371113	0.846197	0.78421	protective	NA
PID_MYC_PATHWAY	REACTOME_L1CAM_INTERACTIONS	rs4977749	9	21927328	CDKN2A	rs12357206	10	60030625	ANK3	dominant	0.243982	0.261284	0.844993	0.912411	protective	NA
PID_MYC_PATHWAY	REACTOME_L1CAM_INTERACTIONS	rs4977749	9	21927328	CDKN2A	rs151361	20	59038947	TUBB1	dominant	0.127633	0.141926	0.837952	0.884559	protective	NA
PID_MYC_PATHWAY	REACTOME_L1CAM_INTERACTIONS	rs3194151	16	370140	AXIN1	rs353116	2	165277122	SCN2A	dominant	0.189569	0.209378	0.837015	0.883259	protective	NA
PID_MYC_PATHWAY	REACTOME_L1CAM_INTERACTIONS	rs2166799	3	196820667	PAK2	rs1201689	15	41813720	SPTBN5	dominant	0.434303	0.454363	0.836372	0.921955	protective	NA
PID_MYC_PATHWAY	REACTOME_L1CAM_INTERACTIONS	rs2071915	16	376432	AXIN1	rs1978973	3	105622370	ALCAM	dominant	0.0987964	0.112337	0.835069	0.86625	protective	NA
PID_MYC_PATHWAY	REACTOME_L1CAM_INTERACTIONS	rs7189020	16	254804	AXIN1	rs10810812	9	17586103	SH3GL2	dominant	0.398947	0.421013	0.832133	0.912799	protective	NA
PID_MYC_PATHWAY	REACTOME_L1CAM_INTERACTIONS	rs2084385	3	196826996	PAK2	rs353116	2	165277122	SCN2A	dominant	0.139669	0.157974	0.828437	0.865316	protective	NA
PID_MYC_PATHWAY	REACTOME_L1CAM_INTERACTIONS	rs4977749	9	21927328	CDKN2A	rs7296288	12	49086185	TUBA1B	dominant	0.239218	0.256269	0.818581	0.912542	protective	NA
PID_MYC_PATHWAY	REACTOME_L1CAM_INTERACTIONS	rs739999	16	269512	AXIN1	rs41273499	1	158562824	SPTA1	dominant	0.022317	0.0298395	0.81582	0.742145	protective	NA
PID_MYC_PATHWAY	REACTOME_L1CAM_INTERACTIONS	rs3799977	6	44869619	SUPT3H	rs34789048	9	36169726	CLTA	dominant	0.100552	0.11334	0.812054	0.874554	protective	NA
PID_MYC_PATHWAY	REACTOME_L1CAM_INTERACTIONS	rs3194151	16	370140	AXIN1	rs11604757	11	1029320	AP2A2	dominant	0.0684554	0.0797392	0.805346	0.848092	protective	NA
PID_MYC_PATHWAY	REACTOME_L1CAM_INTERACTIONS	rs3194151	16	370140	AXIN1	rs28568406	1	158717373	SPTA1	dominant	0.186058	0.204363	0.804596	0.889955	protective	NA
PID_MYC_PATHWAY	REACTOME_L1CAM_INTERACTIONS	rs3194151	16	370140	AXIN1	rs11979158	7	55091656	EGFR	dominant	0.0804915	0.0915246	0.802273	0.8689	protective	NA
PID_MYC_PATHWAY	REACTOME_L1CAM_INTERACTIONS	rs400037	16	286396	AXIN1	rs34162626	6	13611846	RANBP9	dominant	0.0336008	0.0408726	0.797412	0.8159	protective	NA
PID_MYC_PATHWAY	REACTOME_L1CAM_INTERACTIONS	rs4977749	9	21927328	CDKN2A	rs286592	5	154996537	KIF4B	dominant	0.189067	0.204865	0.795877	0.90491	protective	NA
PID_MYC_PATHWAY	REACTOME_L1CAM_INTERACTIONS	rs3194151	16	370140	AXIN1	rs35710474	7	107959361	LAMB1	dominant	0.031344	0.0391174	0.794115	0.794852	protective	NA
PID_MYC_PATHWAY	REACTOME_L1CAM_INTERACTIONS	rs753307	19	49015227	RUVBL2	rs1978973	3	105622370	ALCAM	dominant	0.112086	0.126128	0.790478	0.874614	protective	NA
PID_MYC_PATHWAY	REACTOME_L1CAM_INTERACTIONS	rs3194151	16	370140	AXIN1	rs1741487	14	64779244	SPTB	dominant	0.122367	0.137412	0.786297	0.875245	protective	NA
PID_MYC_PATHWAY	REACTOME_L1CAM_INTERACTIONS	rs4758443	11	6627193	TAF10	rs741842	14	73251012	NUMB	dominant	0.133651	0.14669	0.771354	0.897398	protective	NA
PID_MYC_PATHWAY	REACTOME_L1CAM_INTERACTIONS	rs3765148	19	48944456	RUVBL2	rs11888208	2	166456941	SCN7A	dominant	0.0308425	0.0386158	0.770434	0.792295	protective	NA
PID_MYC_PATHWAY	REACTOME_L1CAM_INTERACTIONS	rs4977749	9	21927328	CDKN2A	rs2300014	7	108297798	NRCAM	dominant	0.231946	0.248495	0.758134	0.913288	protective	NA
PID_MYC_PATHWAY	REACTOME_L1CAM_INTERACTIONS	rs6776064	3	196708663	PAK2	rs353116	2	165277122	SCN2A	dominant	0.339268	0.361334	0.754508	0.907574	protective	NA
PID_MYC_PATHWAY	REACTOME_L1CAM_INTERACTIONS	rs400037	16	286396	AXIN1	rs41273499	1	158562824	SPTA1	dominant	0.0476429	0.0571715	0.75394	0.824996	protective	NA
PID_MYC_PATHWAY	REACTOME_L1CAM_INTERACTIONS	rs3194151	16	370140	AXIN1	rs10510181	3	149364	CHL1	dominant	0.165747	0.181545	0.753933	0.895695	protective	NA
PID_MYC_PATHWAY	REACTOME_L1CAM_INTERACTIONS	rs739999	16	269512	AXIN1	rs1978973	3	105622370	ALCAM	dominant	0.025326	0.0336008	0.752619	0.747332	protective	NA
PID_MYC_PATHWAY	REACTOME_L1CAM_INTERACTIONS	rs11040923	11	6563777	TAF10	rs34789048	9	36169726	CLTA	dominant	0.112839	0.125878	0.738488	0.883239	protective	NA
PID_MYC_PATHWAY	REACTOME_L1CAM_INTERACTIONS	rs11040923	11	6563777	TAF10	rs11071896	15	66528912	MAP2K1	dominant	0.341023	0.359579	0.735058	0.921691	protective	NA
PID_MYC_PATHWAY	REACTOME_L1CAM_INTERACTIONS	rs6776064	3	196708663	PAK2	rs1978973	3	105622370	ALCAM	dominant	0.0832497	0.0955366	0.713531	0.859712	protective	NA
PID_MYC_PATHWAY	REACTOME_L1CAM_INTERACTIONS	rs73177903	3	120072200	GSK3B	rs151361	20	59038947	TUBB1	dominant	0.0351053	0.0433801	0.712115	0.802309	protective	NA
PID_MYC_PATHWAY	REACTOME_L1CAM_INTERACTIONS	rs2303100	19	9857758	PIN1	rs11599164	10	60072226	ANK3	dominant	0.135406	0.148696	0.704946	0.896627	protective	NA
PID_MYC_PATHWAY	REACTOME_L1CAM_INTERACTIONS	rs4466998	14	65008822	MAX	rs11604757	11	1029320	AP2A2	dominant	0.157222	0.171515	0.702554	0.901121	protective	NA
PID_MYC_PATHWAY	REACTOME_L1CAM_INTERACTIONS	rs6776064	3	196708663	PAK2	rs11071896	15	66528912	MAP2K1	dominant	0.246991	0.263791	0.694463	0.915422	protective	NA
PID_MYC_PATHWAY	REACTOME_L1CAM_INTERACTIONS	rs1185246	5	69419483	TAF9	rs28568406	1	158717373	SPTA1	dominant	0.445085	0.466399	0.655024	0.917647	protective	NA
PID_MYC_PATHWAY	REACTOME_L1CAM_INTERACTIONS	rs400037	16	286396	AXIN1	rs34789048	9	36169726	CLTA	dominant	0.0544132	0.0641926	0.644237	0.83889	protective	NA
PID_MYC_PATHWAY	REACTOME_L1CAM_INTERACTIONS	rs400037	16	286396	AXIN1	rs2293079	2	219236065	TUBA4A/TUBA4B	dominant	0.0804915	0.0940321	0.63952	0.843395	protective	NA
PID_MYC_PATHWAY	REACTOME_L1CAM_INTERACTIONS	rs848210	1	15933318	ZBTB17	rs10810812	9	17586103	SH3GL2	dominant	0.414995	0.436058	0.638903	0.91743	protective	NA
PID_MYC_PATHWAY	REACTOME_L1CAM_INTERACTIONS	rs4977749	9	21927328	CDKN2A	rs1805007	16	89919709	TUBB3	dominant	0.0366098	0.0453862	0.627505	0.799282	protective	NA
PID_MYC_PATHWAY	REACTOME_L1CAM_INTERACTIONS	rs3799977	6	44869619	SUPT3H	rs2293079	2	219236065	TUBA4A/TUBA4B	dominant	0.157472	0.174524	0.623863	0.884038	protective	NA
PID_MYC_PATHWAY	REACTOME_L1CAM_INTERACTIONS	rs400037	16	286396	AXIN1	rs71377306	17	47347921	ITGB3	dominant	0.0318455	0.0408726	0.613721	0.771876	protective	NA
PID_MYC_PATHWAY	REACTOME_L1CAM_INTERACTIONS	rs743580	15	74035775	PML	rs10510181	3	149364	CHL1	dominant	0.395938	0.414493	0.605866	0.92589	protective	NA
PID_MYC_PATHWAY	REACTOME_L1CAM_INTERACTIONS	rs6776064	3	196708663	PAK2	rs28568406	1	158717373	SPTA1	dominant	0.332748	0.352307	0.595042	0.916799	protective	NA
PID_MYC_PATHWAY	REACTOME_L1CAM_INTERACTIONS	rs3194151	16	370140	AXIN1	rs1201689	15	41813720	SPTBN5	dominant	0.187312	0.202608	0.593579	0.907105	protective	NA
PID_MYC_PATHWAY	REACTOME_L1CAM_INTERACTIONS	rs4977749	9	21927328	CDKN2A	rs34789048	9	36169726	CLTA	dominant	0.0488967	0.0584253	0.589412	0.828525	protective	NA
PID_MYC_PATHWAY	REACTOME_L1CAM_INTERACTIONS	rs848208	1	15929149	ZBTB17	rs10510181	3	149364	CHL1	dominant	0.0915246	0.104062	0.588966	0.86738	protective	NA
PID_MYC_PATHWAY	REACTOME_L1CAM_INTERACTIONS	rs11040923	11	6563777	TAF10	rs10510181	3	149364	CHL1	dominant	0.391174	0.409478	0.57616	0.926575	protective	NA
PID_MYC_PATHWAY	REACTOME_L1CAM_INTERACTIONS	rs4758443	11	6627193	TAF10	rs71377306	17	47347921	ITGB3	dominant	0.05667	0.0677031	0.567269	0.827247	protective	NA
PID_MYC_PATHWAY	REACTOME_L1CAM_INTERACTIONS	rs73177903	3	120072200	GSK3B	rs11888208	2	166456941	SCN7A	dominant	0.0278335	0.0346038	0.556942	0.798746	protective	NA
PID_MYC_PATHWAY	REACTOME_L1CAM_INTERACTIONS	rs400037	16	286396	AXIN1	rs1978973	3	105622370	ALCAM	dominant	0.0511535	0.0609328	0.538135	0.830854	protective	NA
PID_MYC_PATHWAY	REACTOME_L1CAM_INTERACTIONS	rs753307	19	49015227	RUVBL2	rs10810812	9	17586103	SH3GL2	dominant	0.463892	0.484955	0.53453	0.918984	protective	NA
PID_MYC_PATHWAY	REACTOME_L1CAM_INTERACTIONS	rs3194151	16	370140	AXIN1	rs1978973	3	105622370	ALCAM	dominant	0.0443831	0.053661	0.52763	0.819073	protective	NA
PID_MYC_PATHWAY	REACTOME_L1CAM_INTERACTIONS	rs400037	16	286396	AXIN1	rs694739	11	64329761	RPS6KA4	dominant	0.20336	0.22317	0.513192	0.888577	protective	NA
PID_MYC_PATHWAY	REACTOME_L1CAM_INTERACTIONS	rs739999	16	269512	AXIN1	rs2804918	6	13584351	RANBP9	dominant	0.112086	0.125376	0.509543	0.880619	protective	NA
PID_MYC_PATHWAY	REACTOME_L1CAM_INTERACTIONS	rs3765148	19	48944456	RUVBL2	rs303819	12	51821318	SCN8A	dominant	0.028335	0.0351053	0.505746	0.801519	protective	NA
PID_MYC_PATHWAY	REACTOME_L1CAM_INTERACTIONS	rs4758443	11	6627193	TAF10	rs2293079	2	219236065	TUBA4A/TUBA4B	dominant	0.145687	0.161735	0.504282	0.883854	protective	NA
PID_MYC_PATHWAY	REACTOME_L1CAM_INTERACTIONS	rs3731211	9	21986848	CDKN2A	rs34789048	9	36169726	CLTA	dominant	0.0692076	0.0792377	0.494628	0.864006	protective	NA
PID_MYC_PATHWAY	REACTOME_L1CAM_INTERACTIONS	rs4466998	14	65008822	MAX	rs694739	11	64329761	RPS6KA4	dominant	0.422267	0.446088	0.488605	0.907568	protective	NA
PID_MYC_PATHWAY	REACTOME_L1CAM_INTERACTIONS	rs4977749	9	21927328	CDKN2A	rs20559	1	183130425	LAMC1	dominant	0.0333501	0.0413741	0.488006	0.79937	protective	NA
PID_MYC_PATHWAY	REACTOME_L1CAM_INTERACTIONS	rs400037	16	286396	AXIN1	rs10810812	9	17586103	SH3GL2	dominant	0.214644	0.231946	0.478576	0.905018	protective	NA
PID_MYC_PATHWAY	REACTOME_L1CAM_INTERACTIONS	rs3194151	16	370140	AXIN1	rs34789048	9	36169726	CLTA	dominant	0.0443831	0.0529087	0.473102	0.831379	protective	NA
PID_MYC_PATHWAY	REACTOME_L1CAM_INTERACTIONS	rs2084385	3	196826996	PAK2	rs10510181	3	149364	CHL1	dominant	0.125125	0.137914	0.41895	0.894011	protective	NA
PID_MYC_PATHWAY	REACTOME_L1CAM_INTERACTIONS	rs753307	19	49015227	RUVBL2	rs7694725	4	113079800	ANK2	dominant	0.246991	0.264293	0.410778	0.913062	protective	NA
PID_MYC_PATHWAY	REACTOME_L1CAM_INTERACTIONS	rs1122326	17	42122855	KAT2A	rs7694725	4	113079800	ANK2	dominant	0.127884	0.141424	0.389293	0.890216	protective	NA
PID_MYC_PATHWAY	REACTOME_L1CAM_INTERACTIONS	rs35599968	11	6623196	TAF10	rs41273499	1	158562824	SPTA1	dominant	0.0173019	0.0230692	0.374482	0.745598	protective	NA
PID_MYC_PATHWAY	REACTOME_L1CAM_INTERACTIONS	rs2166799	3	196820667	PAK2	rs1801475	20	63406924	KCNQ2	dominant	0.409228	0.429789	0.371606	0.919019	protective	NA
PID_MYC_PATHWAY	REACTOME_L1CAM_INTERACTIONS	rs739999	16	269512	AXIN1	rs10810812	9	17586103	SH3GL2	dominant	0.116349	0.130642	0.352967	0.87619	protective	NA
PID_MYC_PATHWAY	REACTOME_L1CAM_INTERACTIONS	rs753307	19	49015227	RUVBL2	rs353116	2	165277122	SCN2A	dominant	0.467151	0.488716	0.340135	0.91719	protective	NA
PID_MYC_PATHWAY	REACTOME_L1CAM_INTERACTIONS	rs2071915	16	376432	AXIN1	rs62244081	3	38771518	SCN10A	dominant	0.2999	0.319208	0.333518	0.913602	protective	NA
PID_MYC_PATHWAY	REACTOME_L1CAM_INTERACTIONS	rs4977749	9	21927328	CDKN2A	rs2293079	2	219236065	TUBA4A/TUBA4B	dominant	0.07999	0.0922768	0.32195	0.855271	protective	NA
PID_MYC_PATHWAY	REACTOME_L1CAM_INTERACTIONS	rs1122326	17	42122855	KAT2A	rs28568406	1	158717373	SPTA1	dominant	0.241976	0.258526	0.321112	0.915549	protective	NA
PID_MYC_PATHWAY	REACTOME_L1CAM_INTERACTIONS	rs2084385	3	196826996	PAK2	rs10810812	9	17586103	SH3GL2	dominant	0.141174	0.155968	0.312619	0.889552	protective	NA
PID_MYC_PATHWAY	REACTOME_L1CAM_INTERACTIONS	rs7189020	16	254804	AXIN1	rs353116	2	165277122	SCN2A	dominant	0.397944	0.418004	0.272475	0.920289	protective	NA
PID_MYC_PATHWAY	REACTOME_L1CAM_INTERACTIONS	rs4977749	9	21927328	CDKN2A	rs34162626	6	13611846	RANBP9	dominant	0.0341023	0.0413741	0.258872	0.818037	protective	NA
PID_MYC_PATHWAY	REACTOME_L1CAM_INTERACTIONS	rs9472414	6	44978769	SUPT3H	rs71377306	17	47347921	ITGB3	dominant	0.0371113	0.0456369	0.243541	0.805987	protective	NA
PID_MYC_PATHWAY	REACTOME_L1CAM_INTERACTIONS	rs11040923	11	6563777	TAF10	rs2293079	2	219236065	TUBA4A/TUBA4B	dominant	0.176028	0.192327	0.212574	0.89715	protective	NA
REACTOME_PURINE_SALVAGE	REACTOME_L1CAM_INTERACTIONS	rs11001034	10	74420577	ADK	rs10810812	9	17586103	SH3GL2	dominant	0.359328	0.403711	4.51721	0.828402	protective	NA
REACTOME_PURINE_SALVAGE	REACTOME_L1CAM_INTERACTIONS	rs729421	14	24267755	GMPR2	rs71377306	17	47347921	ITGB3	dominant	0.0514042	0.0722166	4.03927	0.696188	protective	NA
REACTOME_PURINE_SALVAGE	REACTOME_L1CAM_INTERACTIONS	rs1130409	14	20456995	PNP	rs353116	2	165277122	SCN2A	dominant	0.423771	0.464895	3.81859	0.846489	protective	NA
REACTOME_PURINE_SALVAGE	REACTOME_L1CAM_INTERACTIONS	rs837763	16	88787321	APRT	rs694739	11	64329761	RPS6KA4	dominant	0.376881	0.417753	3.79426	0.842985	protective	NA
REACTOME_PURINE_SALVAGE	REACTOME_L1CAM_INTERACTIONS	rs837763	16	88787321	APRT	rs10510181	3	149364	CHL1	dominant	0.339519	0.379137	3.75301	0.841786	protective	NA
REACTOME_PURINE_SALVAGE	REACTOME_L1CAM_INTERACTIONS	rs11001034	10	74420577	ADK	rs694739	11	64329761	RPS6KA4	dominant	0.337513	0.37663	3.59444	0.843225	protective	NA
REACTOME_PURINE_SALVAGE	REACTOME_L1CAM_INTERACTIONS	rs11001034	10	74420577	ADK	rs1201689	15	41813720	SPTBN5	dominant	0.354313	0.390171	3.23265	0.857667	protective	NA
REACTOME_PURINE_SALVAGE	REACTOME_L1CAM_INTERACTIONS	rs11042836	11	10482189	AMPD3	rs2293079	2	219236065	TUBA4A/TUBA4B	dominant	0.0268305	0.0423771	3.21413	0.623022	protective	NA
REACTOME_PURINE_SALVAGE	REACTOME_L1CAM_INTERACTIONS	rs11001034	10	74420577	ADK	rs7694725	4	113079800	ANK2	dominant	0.18656	0.216399	3.17259	0.830484	protective	NA
REACTOME_PURINE_SALVAGE	REACTOME_L1CAM_INTERACTIONS	rs837763	16	88787321	APRT	rs2293079	2	219236065	TUBA4A/TUBA4B	dominant	0.148445	0.176028	3.13969	0.815989	protective	NA
REACTOME_PURINE_SALVAGE	REACTOME_L1CAM_INTERACTIONS	rs837763	16	88787321	APRT	rs10810812	9	17586103	SH3GL2	dominant	0.401705	0.438064	3.11426	0.861273	protective	NA
REACTOME_PURINE_SALVAGE	REACTOME_L1CAM_INTERACTIONS	rs837763	16	88787321	APRT	rs28568406	1	158717373	SPTA1	dominant	0.390672	0.42653	3.07113	0.862031	protective	NA
REACTOME_PURINE_SALVAGE	REACTOME_L1CAM_INTERACTIONS	rs11042836	11	10482189	AMPD3	rs11071896	15	66528912	MAP2K1	dominant	0.0584253	0.0777332	2.97809	0.7362	protective	NA
REACTOME_PURINE_SALVAGE	REACTOME_L1CAM_INTERACTIONS	rs179993	6	16321561	GMPR	rs28568406	1	158717373	SPTA1	dominant	0.367101	0.401705	2.9153	0.863892	protective	NA
REACTOME_PURINE_SALVAGE	REACTOME_L1CAM_INTERACTIONS	rs2295322	14	24210671	GMPR2	rs694739	11	64329761	RPS6KA4	dominant	0.421515	0.457874	2.89159	0.86273	protective	NA
REACTOME_PURINE_SALVAGE	REACTOME_L1CAM_INTERACTIONS	rs1721240	2	73900162	DGUOK	rs2293079	2	219236065	TUBA4A/TUBA4B	dominant	0.167001	0.194333	2.88393	0.831158	protective	NA
REACTOME_PURINE_SALVAGE	REACTOME_L1CAM_INTERACTIONS	rs179993	6	16321561	GMPR	rs11071896	15	66528912	MAP2K1	dominant	0.275577	0.306921	2.81461	0.859027	protective	NA
REACTOME_PURINE_SALVAGE	REACTOME_L1CAM_INTERACTIONS	rs837763	16	88787321	APRT	rs34789048	9	36169726	CLTA	dominant	0.0960381	0.117352	2.73442	0.79908	protective	NA
REACTOME_PURINE_SALVAGE	REACTOME_L1CAM_INTERACTIONS	rs11001034	10	74420577	ADK	rs17519184	18	6986715	LAMA1	dominant	0.342528	0.376881	2.6502	0.861361	protective	NA
REACTOME_PURINE_SALVAGE	REACTOME_L1CAM_INTERACTIONS	rs1130409	14	20456995	PNP	rs694739	11	64329761	RPS6KA4	dominant	0.404965	0.439819	2.64161	0.866819	protective	NA
REACTOME_PURINE_SALVAGE	REACTOME_L1CAM_INTERACTIONS	rs1721240	2	73900162	DGUOK	rs1201689	15	41813720	SPTBN5	dominant	0.419509	0.452608	2.63306	0.87402	protective	NA
REACTOME_PURINE_SALVAGE	REACTOME_L1CAM_INTERACTIONS	rs1130409	14	20456995	PNP	rs10810812	9	17586103	SH3GL2	dominant	0.435306	0.468656	2.59873	0.873983	protective	NA
REACTOME_PURINE_SALVAGE	REACTOME_L1CAM_INTERACTIONS	rs1047730	11	10514751	AMPD3	rs3816533	15	41841899	SPTBN5	dominant	0.0504012	0.0664493	2.57536	0.745672	protective	NA
REACTOME_PURINE_SALVAGE	REACTOME_L1CAM_INTERACTIONS	rs179993	6	16321561	GMPR	rs694739	11	64329761	RPS6KA4	dominant	0.35682	0.390171	2.47399	0.867105	protective	NA
REACTOME_PURINE_SALVAGE	REACTOME_L1CAM_INTERACTIONS	rs179993	6	16321561	GMPR	rs1201689	15	41813720	SPTBN5	dominant	0.365346	0.396189	2.46207	0.877338	protective	NA
REACTOME_PURINE_SALVAGE	REACTOME_L1CAM_INTERACTIONS	rs729421	14	24267755	GMPR2	rs41273499	1	158562824	SPTA1	dominant	0.0797392	0.0980441	2.45162	0.797122	protective	NA
REACTOME_PURINE_SALVAGE	REACTOME_L1CAM_INTERACTIONS	rs179993	6	16321561	GMPR	rs303819	12	51821318	SCN8A	dominant	0.149198	0.172016	2.38958	0.844085	protective	NA
REACTOME_PURINE_SALVAGE	REACTOME_L1CAM_INTERACTIONS	rs11001034	10	74420577	ADK	rs11979158	7	55091656	EGFR	dominant	0.155968	0.179539	2.38879	0.844455	protective	NA
REACTOME_PURINE_SALVAGE	REACTOME_L1CAM_INTERACTIONS	rs11001034	10	74420577	ADK	rs3018474	11	77504355	PAK1	dominant	0.382397	0.412237	2.37563	0.882798	protective	NA
REACTOME_PURINE_SALVAGE	REACTOME_L1CAM_INTERACTIONS	rs729421	14	24267755	GMPR2	rs28568406	1	158717373	SPTA1	dominant	0.367603	0.398696	2.35426	0.87668	protective	NA
REACTOME_PURINE_SALVAGE	REACTOME_L1CAM_INTERACTIONS	rs11001034	10	74420577	ADK	rs1978973	3	105622370	ALCAM	dominant	0.0872618	0.106319	2.34064	0.803618	protective	NA
REACTOME_PURINE_SALVAGE	REACTOME_L1CAM_INTERACTIONS	rs11001034	10	74420577	ADK	rs62244081	3	38771518	SCN10A	dominant	0.253511	0.280341	2.32045	0.871791	protective	NA
REACTOME_PURINE_SALVAGE	REACTOME_L1CAM_INTERACTIONS	rs11001034	10	74420577	ADK	rs20559	1	183130425	LAMC1	dominant	0.0551655	0.0712136	2.31821	0.76149	protective	NA
REACTOME_PURINE_SALVAGE	REACTOME_L1CAM_INTERACTIONS	rs1130409	14	20456995	PNP	rs34789048	9	36169726	CLTA	dominant	0.104062	0.123621	2.31548	0.823408	protective	NA
REACTOME_PURINE_SALVAGE	REACTOME_L1CAM_INTERACTIONS	rs1047730	11	10514751	AMPD3	rs9853984	3	38608689	SCN5A	dominant	0.142427	0.164744	2.29289	0.842038	protective	NA
REACTOME_PURINE_SALVAGE	REACTOME_L1CAM_INTERACTIONS	rs1047730	11	10514751	AMPD3	rs6598858	1	26583274	RPS6KA1	dominant	0.157974	0.180542	2.27997	0.851549	protective	NA
REACTOME_PURINE_SALVAGE	REACTOME_L1CAM_INTERACTIONS	rs2295322	14	24210671	GMPR2	rs10810812	9	17586103	SH3GL2	dominant	0.450602	0.481946	2.26932	0.881622	protective	NA
REACTOME_PURINE_SALVAGE	REACTOME_L1CAM_INTERACTIONS	rs1130409	14	20456995	PNP	rs1201689	15	41813720	SPTBN5	dominant	0.42327	0.453109	2.25119	0.885813	protective	NA
REACTOME_PURINE_SALVAGE	REACTOME_L1CAM_INTERACTIONS	rs1047730	11	10514751	AMPD3	rs12019224	3	37473850	ITGA9	dominant	0.134654	0.157974	2.24807	0.82941	protective	NA
REACTOME_PURINE_SALVAGE	REACTOME_L1CAM_INTERACTIONS	rs1047730	11	10514751	AMPD3	rs10810812	9	17586103	SH3GL2	dominant	0.14343	0.167753	2.24599	0.830729	protective	NA
REACTOME_PURINE_SALVAGE	REACTOME_L1CAM_INTERACTIONS	rs1721240	2	73900162	DGUOK	rs20559	1	183130425	LAMC1	dominant	0.0659478	0.0817452	2.23083	0.793104	protective	NA
REACTOME_PURINE_SALVAGE	REACTOME_L1CAM_INTERACTIONS	rs1721240	2	73900162	DGUOK	rs10510181	3	149364	CHL1	dominant	0.376128	0.405216	2.21281	0.884941	protective	NA
REACTOME_PURINE_SALVAGE	REACTOME_L1CAM_INTERACTIONS	rs729421	14	24267755	GMPR2	rs34789048	9	36169726	CLTA	dominant	0.0895186	0.107573	2.2048	0.815667	protective	NA
REACTOME_PURINE_SALVAGE	REACTOME_L1CAM_INTERACTIONS	rs11042836	11	10482189	AMPD3	rs2300014	7	108297798	NRCAM	dominant	0.088014	0.105567	2.17422	0.817683	protective	NA
REACTOME_PURINE_SALVAGE	REACTOME_L1CAM_INTERACTIONS	rs1130409	14	20456995	PNP	rs286592	5	154996537	KIF4B	dominant	0.386409	0.415496	2.16592	0.885908	protective	NA
REACTOME_PURINE_SALVAGE	REACTOME_L1CAM_INTERACTIONS	rs11001034	10	74420577	ADK	rs62107586	19	6468320	TUBB4A	dominant	0.384654	0.412738	2.16581	0.889422	protective	NA
REACTOME_PURINE_SALVAGE	REACTOME_L1CAM_INTERACTIONS	rs11001034	10	74420577	ADK	rs3759786	15	66337065	MAP2K1	dominant	0.146439	0.168255	2.15948	0.848098	protective	NA
REACTOME_PURINE_SALVAGE	REACTOME_L1CAM_INTERACTIONS	rs837763	16	88787321	APRT	rs1201689	15	41813720	SPTBN5	dominant	0.391926	0.420762	2.13616	0.887293	protective	NA
REACTOME_PURINE_SALVAGE	REACTOME_L1CAM_INTERACTIONS	rs7541738	1	114625979	AMPD1	rs694739	11	64329761	RPS6KA4	dominant	0.281595	0.311685	2.13356	0.865618	protective	NA
REACTOME_PURINE_SALVAGE	REACTOME_L1CAM_INTERACTIONS	rs837763	16	88787321	APRT	rs1978973	3	105622370	ALCAM	dominant	0.0927783	0.111083	2.13015	0.818362	protective	NA
REACTOME_PURINE_SALVAGE	REACTOME_L1CAM_INTERACTIONS	rs179993	6	16321561	GMPR	rs286592	5	154996537	KIF4B	dominant	0.338766	0.367101	2.11065	0.88327	protective	NA
REACTOME_PURINE_SALVAGE	REACTOME_L1CAM_INTERACTIONS	rs11001034	10	74420577	ADK	rs11888208	2	166456941	SCN7A	dominant	0.157974	0.18004	2.10842	0.854443	protective	NA
REACTOME_PURINE_SALVAGE	REACTOME_L1CAM_INTERACTIONS	rs1130409	14	20456995	PNP	rs1978973	3	105622370	ALCAM	dominant	0.104062	0.122869	2.10066	0.829161	protective	NA
REACTOME_PURINE_SALVAGE	REACTOME_L1CAM_INTERACTIONS	rs837763	16	88787321	APRT	rs1531545	5	52897456	ITGA1	dominant	0.475426	0.50326	2.0976	0.894569	protective	NA
REACTOME_PURINE_SALVAGE	REACTOME_L1CAM_INTERACTIONS	rs244076	20	44624274	ADA	rs10956647	8	132190597	KCNQ3	dominant	0.147442	0.169258	2.07946	0.848821	protective	NA
REACTOME_PURINE_SALVAGE	REACTOME_L1CAM_INTERACTIONS	rs179993	6	16321561	GMPR	rs751024	1	22817501	EPHB2	dominant	0.205366	0.229689	2.06411	0.866737	protective	NA
REACTOME_PURINE_SALVAGE	REACTOME_L1CAM_INTERACTIONS	rs729421	14	24267755	GMPR2	rs11604757	11	1029320	AP2A2	dominant	0.129388	0.149198	2.00937	0.847494	protective	NA
REACTOME_PURINE_SALVAGE	REACTOME_L1CAM_INTERACTIONS	rs11042836	11	10482189	AMPD3	rs11549015	15	41943118	SPTBN5	dominant	0.0383651	0.0509027	2.00697	0.743868	protective	NA
REACTOME_PURINE_SALVAGE	REACTOME_L1CAM_INTERACTIONS	rs7541738	1	114625979	AMPD1	rs2293079	2	219236065	TUBA4A/TUBA4B	dominant	0.113842	0.134654	2.00659	0.825582	protective	NA
REACTOME_PURINE_SALVAGE	REACTOME_L1CAM_INTERACTIONS	rs244076	20	44624274	ADA	rs303819	12	51821318	SCN8A	dominant	0.0729689	0.0890171	2.00406	0.805528	protective	NA
REACTOME_PURINE_SALVAGE	REACTOME_L1CAM_INTERACTIONS	rs2295322	14	24210671	GMPR2	rs71377306	17	47347921	ITGB3	dominant	0.0684554	0.0845035	1.99276	0.796133	protective	NA
REACTOME_PURINE_SALVAGE	REACTOME_L1CAM_INTERACTIONS	rs2295322	14	24210671	GMPR2	rs41273499	1	158562824	SPTA1	dominant	0.0977934	0.115095	1.98678	0.833379	protective	NA
REACTOME_PURINE_SALVAGE	REACTOME_L1CAM_INTERACTIONS	rs837763	16	88787321	APRT	rs353116	2	165277122	SCN2A	dominant	0.402457	0.432548	1.98416	0.883581	protective	NA
REACTOME_PURINE_SALVAGE	REACTOME_L1CAM_INTERACTIONS	rs11001034	10	74420577	ADK	rs28568406	1	158717373	SPTA1	dominant	0.355817	0.384403	1.97932	0.884561	protective	NA
REACTOME_PURINE_SALVAGE	REACTOME_L1CAM_INTERACTIONS	rs1721240	2	73900162	DGUOK	rs1978973	3	105622370	ALCAM	dominant	0.0995486	0.117603	1.97577	0.82951	protective	NA
REACTOME_PURINE_SALVAGE	REACTOME_L1CAM_INTERACTIONS	rs11001034	10	74420577	ADK	rs41273499	1	158562824	SPTA1	dominant	0.0787362	0.0955366	1.97345	0.809118	protective	NA
REACTOME_PURINE_SALVAGE	REACTOME_L1CAM_INTERACTIONS	rs2295322	14	24210671	GMPR2	rs34789048	9	36169726	CLTA	dominant	0.105817	0.123621	1.94116	0.838941	protective	NA
REACTOME_PURINE_SALVAGE	REACTOME_L1CAM_INTERACTIONS	rs244076	20	44624274	ADA	rs2228479	16	89919532	TUBB3	dominant	0.0431294	0.0554162	1.93299	0.768287	protective	NA
REACTOME_PURINE_SALVAGE	REACTOME_L1CAM_INTERACTIONS	rs1047730	11	10514751	AMPD3	rs7694725	4	113079800	ANK2	dominant	0.0717151	0.0890171	1.92659	0.790618	protective	NA
REACTOME_PURINE_SALVAGE	REACTOME_L1CAM_INTERACTIONS	rs11001034	10	74420577	ADK	rs10956647	8	132190597	KCNQ3	dominant	0.288616	0.31344	1.92528	0.888668	protective	NA
REACTOME_PURINE_SALVAGE	REACTOME_L1CAM_INTERACTIONS	rs1130409	14	20456995	PNP	rs41273499	1	158562824	SPTA1	dominant	0.0962889	0.11334	1.92382	0.833528	protective	NA
REACTOME_PURINE_SALVAGE	REACTOME_L1CAM_INTERACTIONS	rs12136548	1	114625476	AMPD1	rs71377306	17	47347921	ITGB3	dominant	0.0421264	0.055667	1.91792	0.746059	protective	NA
REACTOME_PURINE_SALVAGE	REACTOME_L1CAM_INTERACTIONS	rs11042836	11	10482189	AMPD3	rs29302	4	113303436	ANK2	dominant	0.086008	0.102056	1.91443	0.827955	protective	NA
REACTOME_PURINE_SALVAGE	REACTOME_L1CAM_INTERACTIONS	rs837763	16	88787321	APRT	rs2283125	9	133727220	VAV2	dominant	0.325727	0.350802	1.89846	0.89399	protective	NA
REACTOME_PURINE_SALVAGE	REACTOME_L1CAM_INTERACTIONS	rs11001034	10	74420577	ADK	rs1531545	5	52897456	ITGA1	dominant	0.432798	0.458877	1.89524	0.899805	protective	NA
REACTOME_PURINE_SALVAGE	REACTOME_L1CAM_INTERACTIONS	rs1721240	2	73900162	DGUOK	rs694739	11	64329761	RPS6KA4	dominant	0.410732	0.441575	1.88712	0.881469	protective	NA
REACTOME_PURINE_SALVAGE	REACTOME_L1CAM_INTERACTIONS	rs11042836	11	10482189	AMPD3	rs7694725	4	113079800	ANK2	dominant	0.0423771	0.05667	1.87982	0.736627	protective	NA
REACTOME_PURINE_SALVAGE	REACTOME_L1CAM_INTERACTIONS	rs11001034	10	74420577	ADK	rs286592	5	154996537	KIF4B	dominant	0.330993	0.356068	1.86798	0.894736	protective	NA
REACTOME_PURINE_SALVAGE	REACTOME_L1CAM_INTERACTIONS	rs11042836	11	10482189	AMPD3	rs34083785	8	132513765	KCNQ3	dominant	0.0752257	0.0915246	1.86341	0.807432	protective	NA
REACTOME_PURINE_SALVAGE	REACTOME_L1CAM_INTERACTIONS	rs837763	16	88787321	APRT	rs34162626	6	13611846	RANBP9	dominant	0.0687061	0.084002	1.85864	0.804477	protective	NA
REACTOME_PURINE_SALVAGE	REACTOME_L1CAM_INTERACTIONS	rs11042836	11	10482189	AMPD3	rs662471	18	7008592	LAMA1	dominant	0.0631896	0.0774824	1.84958	0.803091	protective	NA
REACTOME_PURINE_SALVAGE	REACTOME_L1CAM_INTERACTIONS	rs729421	14	24267755	GMPR2	rs584427	11	113233274	NCAM1	dominant	0.445587	0.47342	1.8451	0.893956	protective	NA
REACTOME_PURINE_SALVAGE	REACTOME_L1CAM_INTERACTIONS	rs179993	6	16321561	GMPR	rs62107586	19	6468320	TUBB4A	dominant	0.395687	0.421264	1.84094	0.899532	protective	NA
REACTOME_PURINE_SALVAGE	REACTOME_L1CAM_INTERACTIONS	rs729421	14	24267755	GMPR2	rs10810812	9	17586103	SH3GL2	dominant	0.378887	0.406971	1.82779	0.888896	protective	NA
REACTOME_PURINE_SALVAGE	REACTOME_L1CAM_INTERACTIONS	rs1721240	2	73900162	DGUOK	rs34789048	9	36169726	CLTA	dominant	0.100802	0.117854	1.82515	0.8391	protective	NA
REACTOME_PURINE_SALVAGE	REACTOME_L1CAM_INTERACTIONS	rs1130409	14	20456995	PNP	rs10510181	3	149364	CHL1	dominant	0.374373	0.400702	1.8142	0.894974	protective	NA
REACTOME_PURINE_SALVAGE	REACTOME_L1CAM_INTERACTIONS	rs1130409	14	20456995	PNP	rs2293079	2	219236065	TUBA4A/TUBA4B	dominant	0.16349	0.185807	1.81194	0.856418	protective	NA
REACTOME_PURINE_SALVAGE	REACTOME_L1CAM_INTERACTIONS	rs1130409	14	20456995	PNP	rs751024	1	22817501	EPHB2	dominant	0.233701	0.256018	1.8085	0.886246	protective	NA
REACTOME_PURINE_SALVAGE	REACTOME_L1CAM_INTERACTIONS	rs1721240	2	73900162	DGUOK	rs28568406	1	158717373	SPTA1	dominant	0.430291	0.458375	1.79408	0.892455	protective	NA
REACTOME_PURINE_SALVAGE	REACTOME_L1CAM_INTERACTIONS	rs11042836	11	10482189	AMPD3	rs685870	11	64344456	RPS6KA4	dominant	0.0664493	0.0807422	1.78864	0.810381	protective	NA
REACTOME_PURINE_SALVAGE	REACTOME_L1CAM_INTERACTIONS	rs1721240	2	73900162	DGUOK	rs62107586	19	6468320	TUBB4A	dominant	0.447342	0.472668	1.78452	0.903049	protective	NA
REACTOME_PURINE_SALVAGE	REACTOME_L1CAM_INTERACTIONS	rs2295322	14	24210671	GMPR2	rs28568406	1	158717373	SPTA1	dominant	0.443581	0.471665	1.78207	0.892989	protective	NA
REACTOME_PURINE_SALVAGE	REACTOME_L1CAM_INTERACTIONS	rs11042836	11	10482189	AMPD3	rs805262	6	31660956	CSNK2B	dominant	0.100802	0.117101	1.7796	0.845211	protective	NA
REACTOME_PURINE_SALVAGE	REACTOME_L1CAM_INTERACTIONS	rs1130409	14	20456995	PNP	rs2228479	16	89919532	TUBB3	dominant	0.105065	0.121866	1.77605	0.845955	protective	NA
REACTOME_PURINE_SALVAGE	REACTOME_L1CAM_INTERACTIONS	rs837763	16	88787321	APRT	rs6699312	1	171836182	DNM3	dominant	0.461133	0.487212	1.76501	0.90067	protective	NA
REACTOME_PURINE_SALVAGE	REACTOME_L1CAM_INTERACTIONS	rs11001034	10	74420577	ADK	rs3827496	3	115622053	GAP43	dominant	0.435807	0.463641	1.76425	0.893596	protective	NA
REACTOME_PURINE_SALVAGE	REACTOME_L1CAM_INTERACTIONS	rs2295322	14	24210671	GMPR2	rs353116	2	165277122	SCN2A	dominant	0.448345	0.477432	1.75148	0.889561	protective	NA
REACTOME_PURINE_SALVAGE	REACTOME_L1CAM_INTERACTIONS	rs837763	16	88787321	APRT	rs286592	5	154996537	KIF4B	dominant	0.362588	0.386911	1.74964	0.901375	protective	NA
REACTOME_PURINE_SALVAGE	REACTOME_L1CAM_INTERACTIONS	rs837763	16	88787321	APRT	rs751024	1	22817501	EPHB2	dominant	0.222919	0.244734	1.74864	0.88529	protective	NA
REACTOME_PURINE_SALVAGE	REACTOME_L1CAM_INTERACTIONS	rs11042836	11	10482189	AMPD3	rs12939821	17	64001926	SCN4A	dominant	0.0905216	0.107573	1.74791	0.825715	protective	NA
REACTOME_PURINE_SALVAGE	REACTOME_L1CAM_INTERACTIONS	rs1721240	2	73900162	DGUOK	rs1531545	5	52897456	ITGA1	dominant	0.508275	0.534855	1.74505	0.898937	protective	NA
REACTOME_PURINE_SALVAGE	REACTOME_L1CAM_INTERACTIONS	rs1047730	11	10514751	AMPD3	rs8106478	19	46873129	AP2S1	dominant	0.142427	0.160732	1.72835	0.867201	protective	NA
REACTOME_PURINE_SALVAGE	REACTOME_L1CAM_INTERACTIONS	rs1047730	11	10514751	AMPD3	rs62107586	19	6468320	TUBB4A	dominant	0.145938	0.165246	1.72443	0.863191	protective	NA
REACTOME_PURINE_SALVAGE	REACTOME_L1CAM_INTERACTIONS	rs729421	14	24267755	GMPR2	rs805262	6	31660956	CSNK2B	dominant	0.443581	0.469408	1.72043	0.901115	protective	NA
REACTOME_PURINE_SALVAGE	REACTOME_L1CAM_INTERACTIONS	rs1721240	2	73900162	DGUOK	rs62244081	3	38771518	SCN10A	dominant	0.30015	0.32322	1.71666	0.898016	protective	NA
REACTOME_PURINE_SALVAGE	REACTOME_L1CAM_INTERACTIONS	rs11001034	10	74420577	ADK	rs353116	2	165277122	SCN2A	dominant	0.363842	0.391926	1.71606	0.88736	protective	NA
REACTOME_PURINE_SALVAGE	REACTOME_L1CAM_INTERACTIONS	rs1130409	14	20456995	PNP	rs2303361	7	6409865	RAC1	dominant	0.253009	0.274824	1.71579	0.893734	protective	NA
REACTOME_PURINE_SALVAGE	REACTOME_L1CAM_INTERACTIONS	rs729421	14	24267755	GMPR2	rs3816533	15	41841899	SPTBN5	dominant	0.15346	0.172267	1.71542	0.871039	protective	NA
REACTOME_PURINE_SALVAGE	REACTOME_L1CAM_INTERACTIONS	rs6537837	1	109577110	AMPD2	rs751024	1	22817501	EPHB2	dominant	0.110582	0.127131	1.7134	0.853637	protective	NA
REACTOME_PURINE_SALVAGE	REACTOME_L1CAM_INTERACTIONS	rs11001034	10	74420577	ADK	rs584427	11	113233274	NCAM1	dominant	0.425276	0.44985	1.71311	0.904952	protective	NA
REACTOME_PURINE_SALVAGE	REACTOME_L1CAM_INTERACTIONS	rs11001034	10	74420577	ADK	rs6764363	3	270666	CHL1	dominant	0.350802	0.374875	1.71038	0.901087	protective	NA
REACTOME_PURINE_SALVAGE	REACTOME_L1CAM_INTERACTIONS	rs1130409	14	20456995	PNP	rs3922844	3	38582762	SCN5A	dominant	0.358576	0.382899	1.70712	0.900965	protective	NA
REACTOME_PURINE_SALVAGE	REACTOME_L1CAM_INTERACTIONS	rs6537837	1	109577110	AMPD2	rs34162626	6	13611846	RANBP9	dominant	0.0338516	0.0438816	1.69134	0.76342	protective	NA
REACTOME_PURINE_SALVAGE	REACTOME_L1CAM_INTERACTIONS	rs11001034	10	74420577	ADK	rs723077	11	113323446	NCAM1	dominant	0.442076	0.466399	1.67906	0.906527	protective	NA
REACTOME_PURINE_SALVAGE	REACTOME_L1CAM_INTERACTIONS	rs7541738	1	114625979	AMPD1	rs62587579	9	137216103	TUBB4B	dominant	0.0426279	0.0539117	1.66924	0.781378	protective	NA
REACTOME_PURINE_SALVAGE	REACTOME_L1CAM_INTERACTIONS	rs179993	6	16321561	GMPR	rs10810812	9	17586103	SH3GL2	dominant	0.379639	0.40672	1.66696	0.892668	protective	NA
REACTOME_PURINE_SALVAGE	REACTOME_L1CAM_INTERACTIONS	rs837763	16	88787321	APRT	rs62244081	3	38771518	SCN10A	dominant	0.284604	0.307172	1.66527	0.897303	protective	NA
REACTOME_PURINE_SALVAGE	REACTOME_L1CAM_INTERACTIONS	rs11042836	11	10482189	AMPD3	rs3808564	8	26581030	DPYSL2	dominant	0.0955366	0.112588	1.66224	0.832555	protective	NA
REACTOME_PURINE_SALVAGE	REACTOME_L1CAM_INTERACTIONS	rs11001034	10	74420577	ADK	rs10510181	3	149364	CHL1	dominant	0.318205	0.342778	1.64996	0.894851	protective	NA
REACTOME_PURINE_SALVAGE	REACTOME_L1CAM_INTERACTIONS	rs11001034	10	74420577	ADK	rs805262	6	31660956	CSNK2B	dominant	0.433049	0.457121	1.64974	0.907116	protective	NA
REACTOME_PURINE_SALVAGE	REACTOME_L1CAM_INTERACTIONS	rs1953225	14	20429517	PNP	rs11599164	10	60072226	ANK3	dominant	0.057673	0.0717151	1.64836	0.792212	protective	NA
REACTOME_PURINE_SALVAGE	REACTOME_L1CAM_INTERACTIONS	rs837763	16	88787321	APRT	rs267561	3	37533460	ITGA9	dominant	0.433801	0.458626	1.64373	0.904401	protective	NA
REACTOME_PURINE_SALVAGE	REACTOME_L1CAM_INTERACTIONS	rs837763	16	88787321	APRT	rs41273499	1	158562824	SPTA1	dominant	0.0910231	0.10682	1.63161	0.837304	protective	NA
REACTOME_PURINE_SALVAGE	REACTOME_L1CAM_INTERACTIONS	rs1130409	14	20456995	PNP	rs805262	6	31660956	CSNK2B	dominant	0.501003	0.525075	1.62862	0.908125	protective	NA
REACTOME_PURINE_SALVAGE	REACTOME_L1CAM_INTERACTIONS	rs179993	6	16321561	GMPR	rs34162626	6	13611846	RANBP9	dominant	0.0664493	0.0797392	1.62833	0.82147	protective	NA
REACTOME_PURINE_SALVAGE	REACTOME_L1CAM_INTERACTIONS	rs729421	14	24267755	GMPR2	rs11979158	7	55091656	EGFR	dominant	0.154213	0.172518	1.62398	0.874549	protective	NA
REACTOME_PURINE_SALVAGE	REACTOME_L1CAM_INTERACTIONS	rs729421	14	24267755	GMPR2	rs694739	11	64329761	RPS6KA4	dominant	0.35331	0.381896	1.6097	0.884253	protective	NA
REACTOME_PURINE_SALVAGE	REACTOME_L1CAM_INTERACTIONS	rs11042836	11	10482189	AMPD3	rs75532475	15	66540128	MAP2K1	dominant	0.0188064	0.0275827	1.60173	0.67572	protective	NA
REACTOME_PURINE_SALVAGE	REACTOME_L1CAM_INTERACTIONS	rs179993	6	16321561	GMPR	rs9853984	3	38608689	SCN5A	dominant	0.397192	0.420762	1.60037	0.90707	protective	NA
REACTOME_PURINE_SALVAGE	REACTOME_L1CAM_INTERACTIONS	rs1130409	14	20456995	PNP	rs12357206	10	60030625	ANK3	dominant	0.504514	0.53009	1.59743	0.902621	protective	NA
REACTOME_PURINE_SALVAGE	REACTOME_L1CAM_INTERACTIONS	rs11550452	14	24184317	GMPR2	rs10810812	9	17586103	SH3GL2	dominant	0.332748	0.358826	1.59697	0.891081	protective	NA
REACTOME_PURINE_SALVAGE	REACTOME_L1CAM_INTERACTIONS	rs1721240	2	73900162	DGUOK	rs41273499	1	158562824	SPTA1	dominant	0.0965396	0.112086	1.59517	0.846476	protective	NA
REACTOME_PURINE_SALVAGE	REACTOME_L1CAM_INTERACTIONS	rs11001034	10	74420577	ADK	rs11604757	11	1029320	AP2A2	dominant	0.128636	0.146439	1.59229	0.860477	protective	NA
REACTOME_PURINE_SALVAGE	REACTOME_L1CAM_INTERACTIONS	rs11001034	10	74420577	ADK	rs13164431	5	52868086	ITGA1	dominant	0.397693	0.423771	1.58833	0.897829	protective	NA
REACTOME_PURINE_SALVAGE	REACTOME_L1CAM_INTERACTIONS	rs837763	16	88787321	APRT	rs62107586	19	6468320	TUBB4A	dominant	0.418756	0.442327	1.58121	0.908321	protective	NA
REACTOME_PURINE_SALVAGE	REACTOME_L1CAM_INTERACTIONS	rs837763	16	88787321	APRT	rs805262	6	31660956	CSNK2B	dominant	0.475426	0.498746	1.57775	0.910866	protective	NA
REACTOME_PURINE_SALVAGE	REACTOME_L1CAM_INTERACTIONS	rs729421	14	24267755	GMPR2	rs2293079	2	219236065	TUBA4A/TUBA4B	dominant	0.146189	0.16675	1.57081	0.855579	protective	NA
REACTOME_PURINE_SALVAGE	REACTOME_L1CAM_INTERACTIONS	rs1130409	14	20456995	PNP	rs10956647	8	132190597	KCNQ3	dominant	0.339769	0.362337	1.56752	0.905664	protective	NA
REACTOME_PURINE_SALVAGE	REACTOME_L1CAM_INTERACTIONS	rs729421	14	24267755	GMPR2	rs286592	5	154996537	KIF4B	dominant	0.347292	0.369609	1.56737	0.907493	protective	NA
REACTOME_PURINE_SALVAGE	REACTOME_L1CAM_INTERACTIONS	rs11042836	11	10482189	AMPD3	rs597503	18	6939948	LAMA1	dominant	0.031344	0.0418756	1.56631	0.740365	protective	NA
REACTOME_PURINE_SALVAGE	REACTOME_L1CAM_INTERACTIONS	rs12136548	1	114625476	AMPD1	rs11888208	2	166456941	SCN7A	dominant	0.125125	0.142678	1.56454	0.859382	protective	NA
REACTOME_PURINE_SALVAGE	REACTOME_L1CAM_INTERACTIONS	rs1130409	14	20456995	PNP	rs7694725	4	113079800	ANK2	dominant	0.227182	0.249749	1.56417	0.883075	protective	NA
REACTOME_PURINE_SALVAGE	REACTOME_L1CAM_INTERACTIONS	rs837763	16	88787321	APRT	rs723077	11	113323446	NCAM1	dominant	0.485206	0.508275	1.5507	0.911834	protective	NA
REACTOME_PURINE_SALVAGE	REACTOME_L1CAM_INTERACTIONS	rs1130409	14	20456995	PNP	rs6598858	1	26583274	RPS6KA1	dominant	0.4832	0.505767	1.54853	0.91366	protective	NA
REACTOME_PURINE_SALVAGE	REACTOME_L1CAM_INTERACTIONS	rs1721240	2	73900162	DGUOK	rs353116	2	165277122	SCN2A	dominant	0.438064	0.465898	1.54685	0.893686	protective	NA
REACTOME_PURINE_SALVAGE	REACTOME_L1CAM_INTERACTIONS	rs1047730	11	10514751	AMPD3	rs3739609	9	36169601	CLTA	dominant	0.147944	0.166249	1.54561	0.870777	protective	NA
REACTOME_PURINE_SALVAGE	REACTOME_L1CAM_INTERACTIONS	rs1721240	2	73900162	DGUOK	rs62587579	9	137216103	TUBB4B	dominant	0.0629388	0.0752257	1.54224	0.825696	protective	NA
REACTOME_PURINE_SALVAGE	REACTOME_L1CAM_INTERACTIONS	rs2295322	14	24210671	GMPR2	rs10510181	3	149364	CHL1	dominant	0.38666	0.411234	1.54204	0.902573	protective	NA
REACTOME_PURINE_SALVAGE	REACTOME_L1CAM_INTERACTIONS	rs837763	16	88787321	APRT	rs1380453	10	60274597	ANK3	dominant	0.470913	0.495236	1.54018	0.907172	protective	NA
REACTOME_PURINE_SALVAGE	REACTOME_L1CAM_INTERACTIONS	rs11042836	11	10482189	AMPD3	rs3018474	11	77504355	PAK1	dominant	0.0892678	0.104313	1.53667	0.841632	protective	NA
REACTOME_PURINE_SALVAGE	REACTOME_L1CAM_INTERACTIONS	rs179993	6	16321561	GMPR	rs71377306	17	47347921	ITGB3	dominant	0.05667	0.0704614	1.53485	0.792512	protective	NA
REACTOME_PURINE_SALVAGE	REACTOME_L1CAM_INTERACTIONS	rs179993	6	16321561	GMPR	rs12205572	6	166365976	RPS6KA2	dominant	0.0656971	0.0784855	1.5333	0.825603	protective	NA
REACTOME_PURINE_SALVAGE	REACTOME_L1CAM_INTERACTIONS	rs11042836	11	10482189	AMPD3	rs1531545	5	52897456	ITGA1	dominant	0.100552	0.116098	1.52925	0.851121	protective	NA
REACTOME_PURINE_SALVAGE	REACTOME_L1CAM_INTERACTIONS	rs1721240	2	73900162	DGUOK	rs751024	1	22817501	EPHB2	dominant	0.237713	0.258275	1.5193	0.895562	protective	NA
REACTOME_PURINE_SALVAGE	REACTOME_L1CAM_INTERACTIONS	rs2278857	15	43340351	ADAL	rs41273499	1	158562824	SPTA1	dominant	0.0739719	0.088014	1.51638	0.827711	protective	NA
REACTOME_PURINE_SALVAGE	REACTOME_L1CAM_INTERACTIONS	rs11550452	14	24184317	GMPR2	rs12205572	6	166365976	RPS6KA2	dominant	0.0483952	0.059679	1.51	0.801309	protective	NA
REACTOME_PURINE_SALVAGE	REACTOME_L1CAM_INTERACTIONS	rs1721240	2	73900162	DGUOK	rs10810812	9	17586103	SH3GL2	dominant	0.437563	0.464142	1.50919	0.898182	protective	NA
REACTOME_PURINE_SALVAGE	REACTOME_L1CAM_INTERACTIONS	rs179993	6	16321561	GMPR	rs11979158	7	55091656	EGFR	dominant	0.160231	0.178034	1.50792	0.88092	protective	NA
REACTOME_PURINE_SALVAGE	REACTOME_L1CAM_INTERACTIONS	rs11042836	11	10482189	AMPD3	rs9853984	3	38608689	SCN5A	dominant	0.0890171	0.104313	1.50581	0.839037	protective	NA
REACTOME_PURINE_SALVAGE	REACTOME_L1CAM_INTERACTIONS	rs1130409	14	20456995	PNP	rs584427	11	113233274	NCAM1	dominant	0.497994	0.52006	1.49933	0.915479	protective	NA
REACTOME_PURINE_SALVAGE	REACTOME_L1CAM_INTERACTIONS	rs729421	14	24267755	GMPR2	rs7006290	8	41757620	ANK1	dominant	0.336259	0.358325	1.49582	0.907221	protective	NA
REACTOME_PURINE_SALVAGE	REACTOME_L1CAM_INTERACTIONS	rs12136548	1	114625476	AMPD1	rs353116	2	165277122	SCN2A	dominant	0.286108	0.311685	1.49378	0.885053	protective	NA
REACTOME_PURINE_SALVAGE	REACTOME_L1CAM_INTERACTIONS	rs12147450	14	20489274	PNP	rs2233701	8	26508200	DPYSL2	dominant	0.0631896	0.077984	1.49208	0.797493	protective	NA
REACTOME_PURINE_SALVAGE	REACTOME_L1CAM_INTERACTIONS	rs12147450	14	20489274	PNP	rs280371	12	41114842	CNTN1	dominant	0.0584253	0.0704614	1.48699	0.818582	protective	NA
REACTOME_PURINE_SALVAGE	REACTOME_L1CAM_INTERACTIONS	rs729421	14	24267755	GMPR2	rs9853984	3	38608689	SCN5A	dominant	0.391174	0.413741	1.48345	0.910409	protective	NA
REACTOME_PURINE_SALVAGE	REACTOME_L1CAM_INTERACTIONS	rs480727	16	88805821	APRT	rs34789048	9	36169726	CLTA	dominant	0.0947844	0.11008	1.48268	0.846498	protective	NA
REACTOME_PURINE_SALVAGE	REACTOME_L1CAM_INTERACTIONS	rs729421	14	24267755	GMPR2	rs34282046	19	19194090	NCAN	dominant	0.0619358	0.0744734	1.4816	0.820534	protective	NA
[truncated: 8,354 more rows]
