# Supplementary material for: BridGE: a pathway-based analysis tool for detecting genetic interactions from GWAS
Source: Springer Nature journal article supplement (doi:10.1038/s41596-024-00954-8), 2024-03-21
Supplement: MOESM4 [file 41596_2024_954_MOESM4_ESM10.zip]

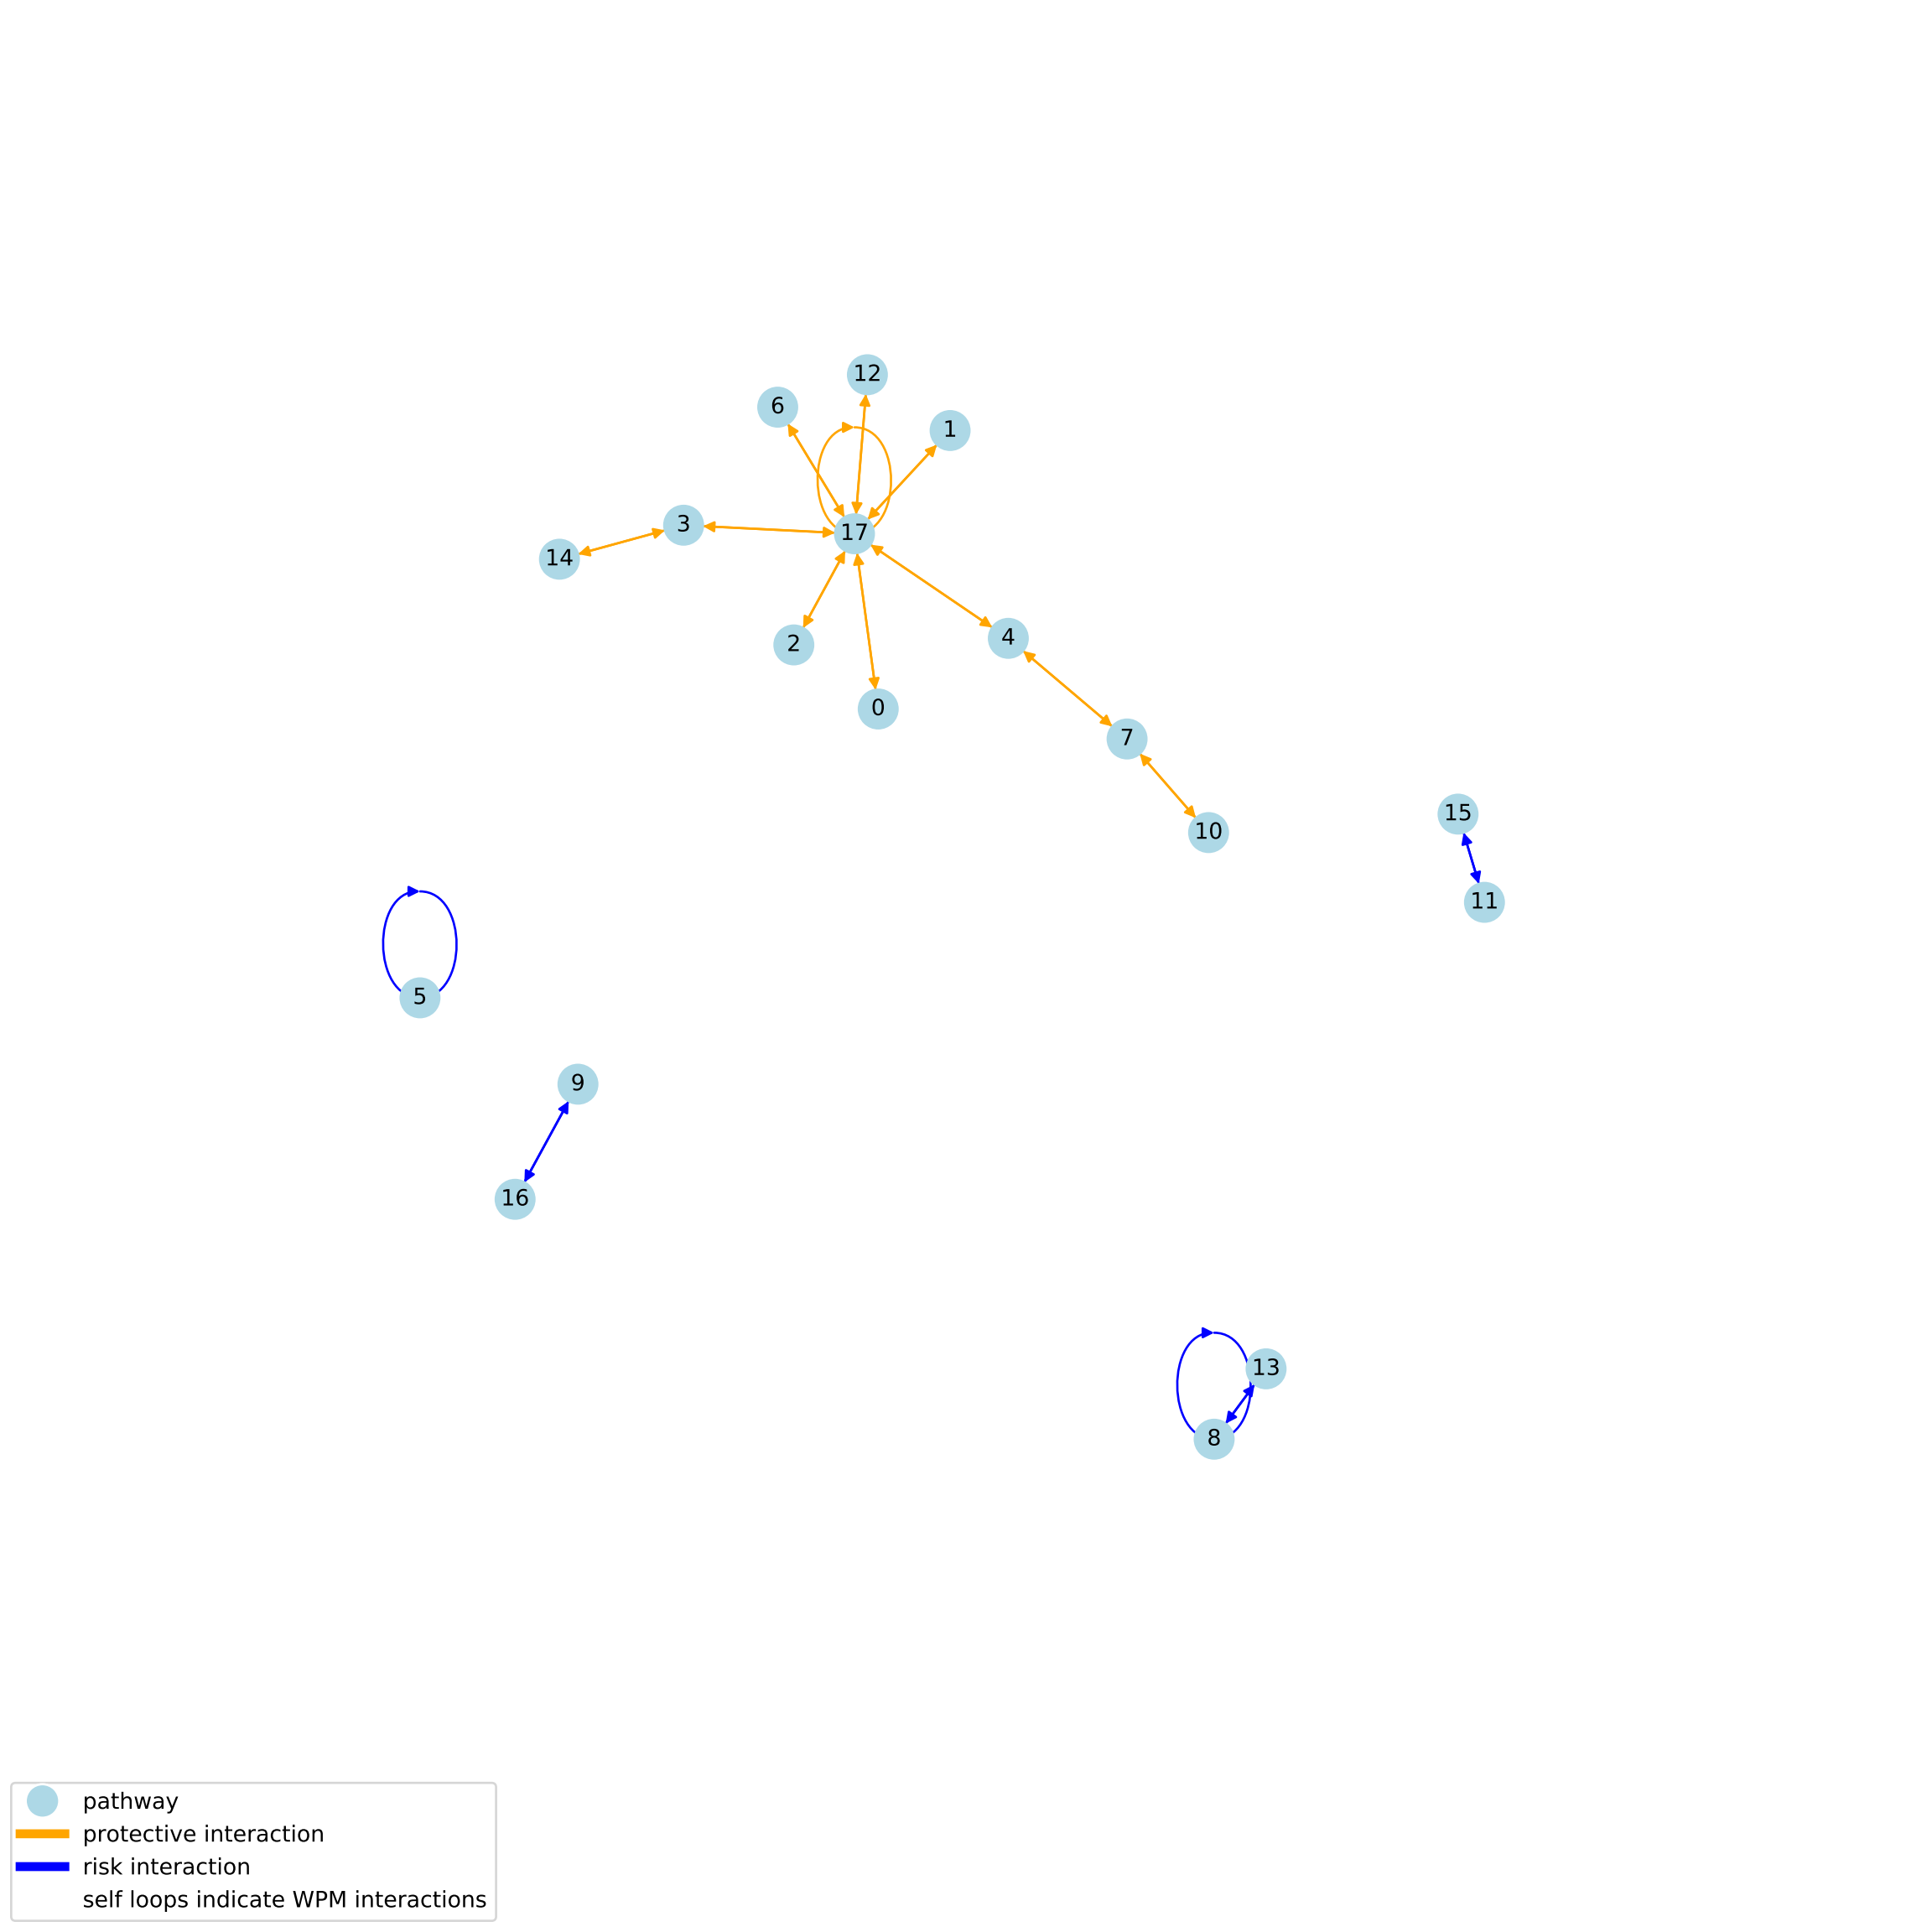

0: PARKINSONS\_DISEASE\_DRUG\_TARGETS  
1: PID\_MYC\_PATHWAY  
2: REACTOME\_DCC\_MEDIATED\_ATTRACTIVE\_SIGNALING  
3: REACTOME\_COPII\_MEDIATED\_VESICLE\_TRANSPORT  
4: REACTOME\_ROLE\_OF\_SECOND\_MESSENGERS\_IN\_NETRIN\_1\_SIGNALING  
5: KEGG\_CELL\_CYCLE  
6: KEGG\_SNARE\_INTERACTIONS\_IN\_VESICULAR\_TRANSPORT  
7: REACTOME\_COPI\_MEDIATED\_ANTEROGRADE\_TRANSPORT  
8: KEGG\_NATURAL\_KILLER\_CELL\_MEDIATED\_CYTOTOXICITY  
9: REACTOME\_CYCLIN\_D\_ASSOCIATED\_EVENTS\_IN\_G1  
10: BIOCARTA\_RANKL\_PATHWAY  
11: BIOCARTA\_AGPCR\_PATHWAY  
12: REACTOME\_PURINE\_SALVAGE  
13: REACTOME\_INTEGRATION\_OF\_ENERGY\_METABOLISM  
14: REACTOME\_VOLTAGE\_GATED\_POTASSIUM\_CHANNELS  
15: REACTOME\_IL\_6\_TYPE\_CYTOKINE\_RECEPTOR\_LIGAND\_INTERACTIONS  
16: BIOCARTA\_PPARA\_PATHWAY  
17: REACTOME\_L1CAM\_INTERACTIONS
